# Supplementary material for: Reactive Oxygen Species Mediate Transcriptional Responses to Dopamine and Cocaine in Human Cerebral Organoids
Source: MDPI journal article supplement (doi:10.3390/ijms242216474), 2023-11-18
Supplement: s1 [file s1]

## **Supplemental Material**

Thomas Rudibaugh, *et al.*

### **Reactive Oxygen Species Mediate Transcriptional Responses to Dopamine and Cocaine in Human Cerebral Organoids**

This file includes:

Figures S1-S4

Tables S1-S3

Not Included:

Supplemental Excel Files 1-7

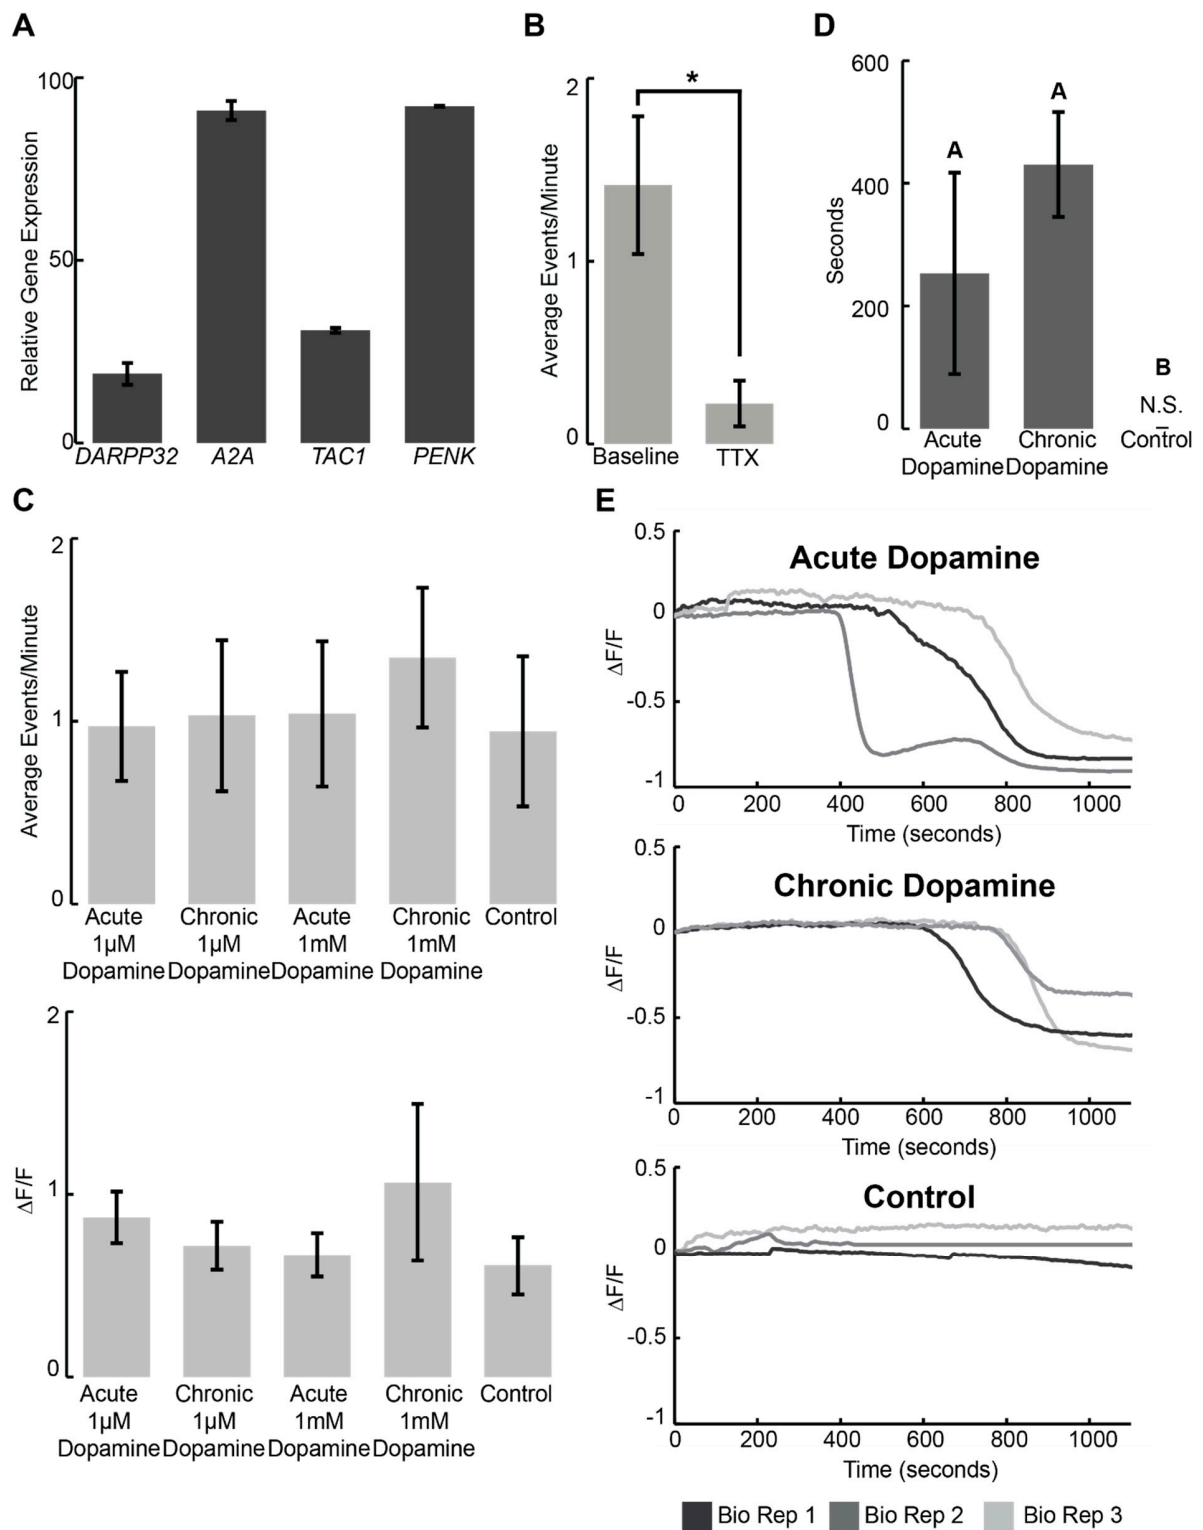

Figure S1, Related to Figure 1; *Ventral forebrain organoids exhibit  $\text{Ca}^{2+}$  and intracellular cAMP responses to dopamine*

**A)** RT-qPCR of D90 organoids for MSN markers DARPP32, A2A, TAC1, and PENK. Gene expression was compared to the reference gene GAPDH, and  $\Delta\Delta\text{Cq}$  values were found by comparing against undifferentiated stem cell controls. **B)**  $\text{Ca}^{2+}$  imaging of D90 organoids shows transients knocked down by TTX. Average transients/minute were measured for active cells (defined as any cell exhibiting at least one  $\text{Ca}^{2+}$  transient during the measurement period). **C)** Frequency and amplitude of  $\text{Ca}^{2+}$  transients following acute or chronic 1 $\mu\text{M}$  or 1mM dopamine exposure. Measurements were averaged across all active cells. **D)** Response time of intracellular cAMP increase following acute or chronic 1 $\mu\text{M}$  dopamine exposure. **E)** Representative response curves of intracellular cAMP increase related to Figure 1F and Figure S1D. **A)** Error bars represent 95% confidence for n=5 replicates. **B-D)** Error bars represent 95% confidence for n=3 replicates. **B-C)** Error bars refer to the mean frequency and amplitude across all cells within an individual biological replicate that display at least 1 calcium transient during the imaging period. **B)** \*  $p < 0.05$ , paired t-test. **C)** Statistics:  $p < 0.05$ , one-way ANOVA with Tukey Kramer post hoc analysis. Conditions sharing the same superscript letters are not statistically significant from each other. Therefore if two bars do not share the same lettering, they are statistically significant from each other.

**A**

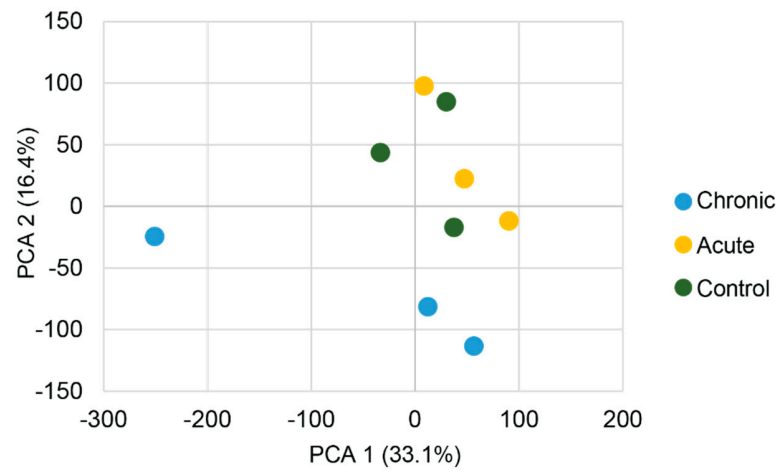

**B**

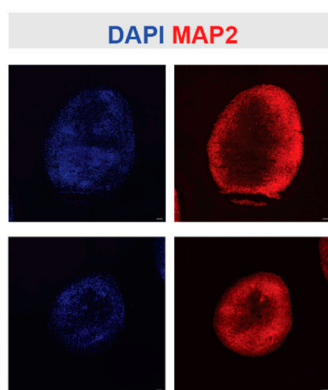

**C**

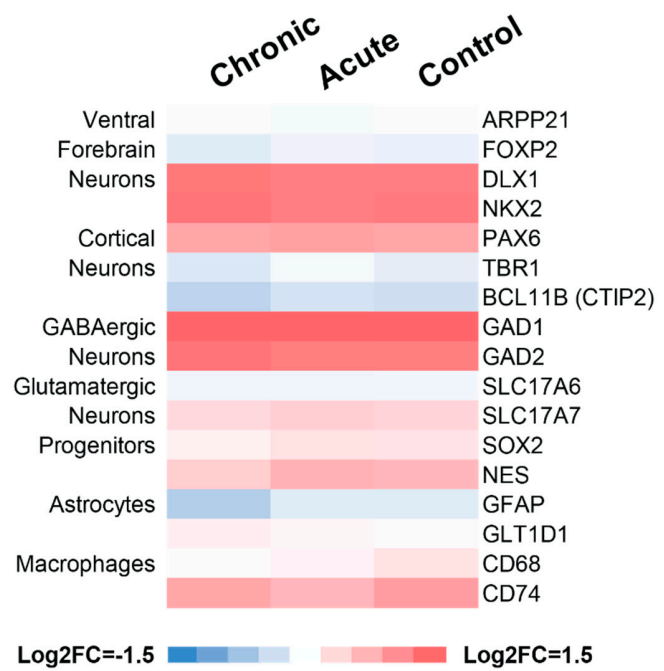

Figure S2, Related to Figure 2- ***Transcriptional analysis reveals immune-related response to acute and chronic dopamine***

**A)** Principal component analysis of the three biological replicates for the three different conditions: chronic dopamine, acute dopamine, and vehicle control. **B)** Immunostaining images of D90 organoids demonstrating neural marker *MAP2* expression around organoid periphery, but not in organoid core. **C)** Heat map of select genes relative to 12 pcw striatal transcriptome.

**A**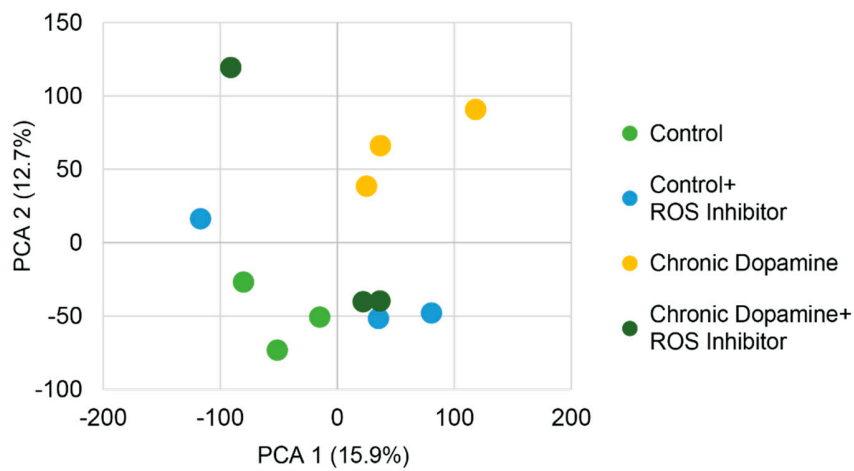**B**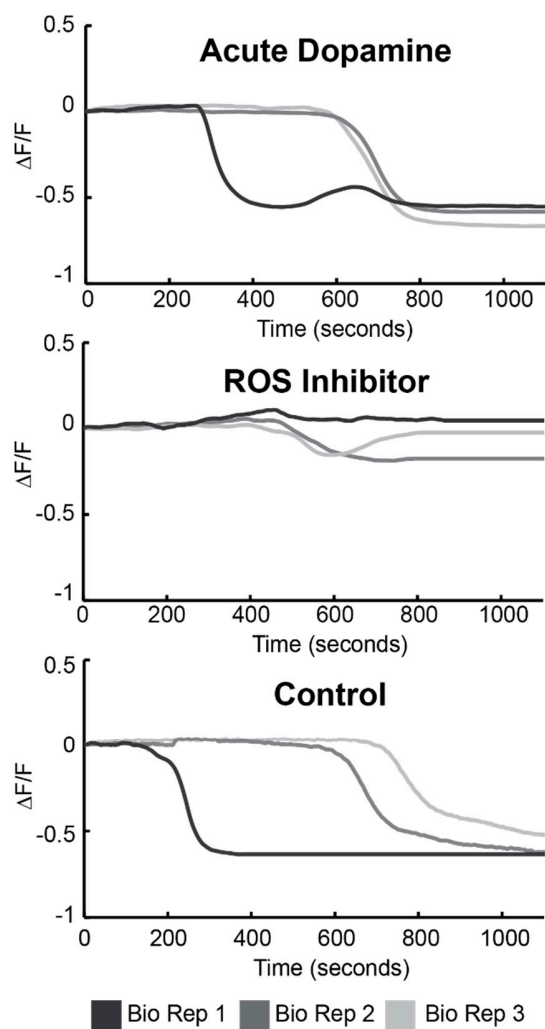

Figure S3; Related to Figure 3- *Organoid response to dopamine driven by reactive oxygen species*

**A)** Principal component analysis showing the three replicates for the four conditions: control, control dosed with an ROS inhibitor, chronic dopamine dosed, and chronic dopamine dosed with an ROS inhibitor. **B)** Representative response curves of intracellular cAMP increase related to Figure 3B.

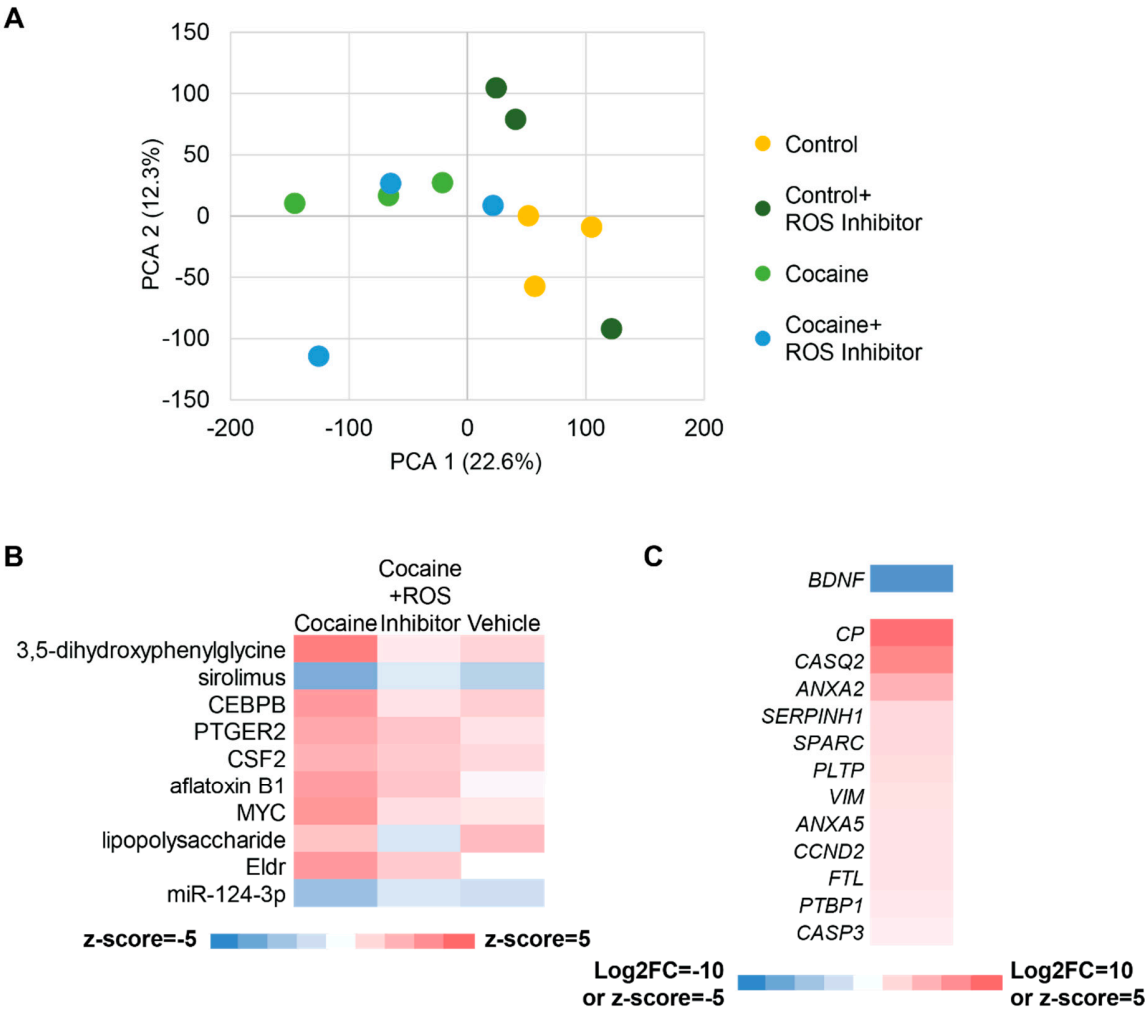

Figure S4; Related to Figure 4- *ROS also mediates the transcriptomic response to cocaine*

**A)** Principal component analysis of the three biological replicates for the four dosing conditions: vehicle controls, vehicle controls with an ROS inhibitor, chronic cocaine, and chronic cocaine with an ROS inhibitor. **B)** Heat map of the top regulated upstream regulators by z-score identified using GSEA following dopamine or cocaine exposure with or without an ROS inhibitor. **C)** Heat map of BDNF predicted z-score and Log2FC of genes associated with BDNF downregulation based on Ingenuity Pathway Analysis (IPA) database.

**Table S1**  
**Related to Figure 1, Primary Antibodies**

| Antigen | Species | Company       | Catalog | RRID        | Dilution |
|---------|---------|---------------|---------|-------------|----------|
| DARPP32 | Rabbit  | Abcam         | Ab40801 | AB_731843   | 1:50     |
| MAP2    | Mouse   | Sigma-Aldrich | M1406   | AB_477171   | 1:250    |
| GABA    | Rabbit  | Sigma-Aldrich | A2052   | AB_477652   | 1:200    |
| CTIP2   | Rat     | Abcam         | Ab18465 | AB_2064130  | 1:250    |
| GSX2    | Rabbit  | Millipore     | Abn162  | AB_11203296 | 1:500    |
| SOX2    | Goat    | R&D Systems   | AF2018  | AB_355110   | 1:100    |

**Table S2**  
**Related to Figure 1, Secondary Antibodies**

| Species | Fluorophore | Company                | Catalog   | RRID       | Dilution |
|---------|-------------|------------------------|-----------|------------|----------|
| Rabbit  | 488         | Life Technologies      | A21206    | AB_2535792 | 1:250    |
| Mouse   | 546         | ThermoFisher           | A10036    | AB_2534012 | 1:250    |
| Rat     | 647         | Jackson Immunoresearch | 712605150 | AB_2340693 | 1:125    |
| Goat    | 647         | Jackson Immunoresearch | 705605003 | AB_2340436 | 1:125    |

**Table S3**  
**Relative to Figure S1, qPCR Primers**

| Gene Symbol | Gene ID | Forward Primer        | Reverse Primer       |
|-------------|---------|-----------------------|----------------------|
| DARPP32     | 84152   | TTGGAAAATCCAGAAAACCG  | CTGGTAGAAGCCGGTGAGAG |
| A2A         | 135     | AGGCAGCAAGAACCTTTCAA  | CTAAGGAGCTCCACGTCTGG |
| PENK        | 5179    | GCTGTCCAAACCAGAGCTTC  | TCTGGCTCCATGGGATAAAG |
| TAC1        | 6863    | TGGGGTTGAAAATTCAAAAAG | GGAGTTTCCTTCCTTTTCCG |
| GAPDH       | 2597    | ATGACATCAAGAAGGTGGTG  | CATACCAGGAAATGAGCTTG |
