# Supplementary material for: Reactive Oxygen Species Mediate Transcriptional Responses to Dopamine and Cocaine in Human Cerebral Organoids
Source: Int J Mol Sci. 2023 Nov 18;24(22):16474. doi: 10.3390/ijms242216474 (PMC10671319; doi:10.3390/ijms242216474)
Supplement: Supplementary file 1 [file ijms-24-16474-s001.zip]

Archive with 8 entries (8 files):
- Supplemental Excel File S1.xlsx
- Supplemental Excel File S2.xlsx
- Supplemental Excel File S3.xlsx
- Supplemental Excel File S4.xlsx
- Supplemental Excel File S5.xlsx
- Supplemental Excel File S6.xlsx
- Supplemental Excel File S7.xlsx
- Supplemental Material 20231113.pdf
