# Supplementary material for: Reactive Oxygen Species Mediate Transcriptional Responses to Dopamine and Cocaine in Human Cerebral Organoids
Source: Int J Mol Sci. 2023 Nov 18;24(22):16474. doi: 10.3390/ijms242216474 (PMC10671319; doi:10.3390/ijms242216474)
Supplement: Supplementary file 1 [file ijms-24-16474-s001.zip › Supplemental Excel File S1.xlsx]

## Sheet: Information
Supplemental Excel File 1
	This file contains flourescence intensity measurements related to Figures 1E, S1B-C
	ROI- refers to region of Interest. In this case an individual cell

## Sheet: Figure 1E&S1C 1uM Chronic 1
	Baseline																																										Following dopamine exposure
Seconds	ROI 1	ROI 2	ROI 3	ROI 4	ROI 5	ROI 6	ROI 7	ROI 8	ROI 9	ROI 10	ROI 11	ROI 12	ROI 13	ROI 14	ROI 15	ROI 16	ROI 17	ROI 18	ROI 19	ROI 20	ROI 21	ROI 22	ROI 23	ROI 24	ROI 25	ROI 26	ROI 27	ROI 28	ROI 29	ROI 30	ROI 31	ROI 32	ROI 33	ROI 34	ROI 35	ROI 36	ROI 37	ROI 38	ROI 39	ROI 40		Seconds	ROI 1	ROI 2	ROI 3	ROI 4	ROI 5	ROI 6	ROI 7
1.90476	22.448	14.352	17.681	9.517	12.703	14.948	11.763	11.121	12.08	11.245	14.25	19.315	13.279	18.131	16.099	15.283	12.827	12.91	14.958	15.206	24.685	12.815	16.297	11.291	22.646	12.802	23.439	17.055	13.174	42.768	29.125	25.825	21.305	20.413	12.952	12.469	12.344	15.669	15.448	12.436		1.90476	15.825	15.921	14.092	9.357	11.782	12.729	13.19
3.80952	21.224	14.584	16.284	9.179	13.122	14.913	11.981	10.688	12.502	11.88	14.97	18.749	12.685	18.517	15.872	15.439	13.149	12.455	13.683	14.864	24.258	11.548	15.82	11.1	22.737	12.719	24.412	15.985	13.94	39.804	29.281	25.252	21.017	20.15	12.422	12.662	12.305	15.289	15.98	13.006		3.80952	15.961	17.968	14.12	9.571	12.902	12.036	12.677
5.71429	19.698	14.813	16.207	9.079	13.027	14.931	12.678	10.872	12.817	11.302	15.19	19.95	12.288	17.862	16.23	15.15	13.743	12.287	13.611	15.121	23.766	12.2	16.919	10.861	23.177	12.215	23.374	15.97	13.872	39.036	27.688	24.874	20.849	20.4	12.633	12.324	11.746	15.398	15.577	13.33		5.71429	16.074	16.368	14.212	9.714	13.119	12.263	12.042
7.61905	18.914	14.808	17.733	9.517	12.561	15.208	13.066	10.957	12.385	10.208	14.31	19.717	12.234	17.159	15.745	14.046	13.139	12	13.551	14.654	23.988	13.267	17.297	10.765	23.126	12.19	23.07	16.2	13.187	39.75	27.477	25.357	20.826	18.906	12.88	12.262	11.437	15.319	16.184	13.274		7.61905	15.728	13.896	13.949	9.884	12.798	12.421	12.159
9.52381	18.953	14.79	17.647	9.861	12.595	14.978	12.948	10.83	12.775	10.677	14.262	18.753	12.378	16.614	16.465	14.335	13.475	11.467	14.132	14.379	24.149	12.563	16.036	11.139	22.309	12	22.567	15	12.455	39.464	29.008	25.462	20.567	19.4	12.418	12.103	11.301	14.801	16.03	13.028		9.52381	15.296	14.061	13.664	10.714	13.772	12.17	12.989
11.4286	19.297	16.425	16.741	10.053	13.216	14.632	12.379	10.745	13.019	11.312	14.732	20.105	12.505	16.841	18.066	15.179	13.851	11.389	15.192	15.103	24.661	11.741	14.703	11.83	22.863	11.24	22.952	14.84	12.102	38.893	28.828	23.909	20.819	21.062	12.673	11.959	11.835	15.464	15.08	11.95		11.4286	15.054	14.643	13.359	10.455	13.705	12.781	12.968
13.3333	20.198	16.918	16.629	9.596	13.351	14.468	12.275	10.603	12.047	11.62	21.679	20.379	12.937	17.062	17.959	14.792	13.371	11.443	14.335	15.467	23.79	11.363	14.297	13.548	22.246	10.496	23.396	16.69	12.587	38.411	28.547	22.797	21.225	21.15	12.661	12.276	12.05	15.861	15.756	12.302		13.3333	15.016	14.532	12.968	9.679	12.829	13.13	12.614
15.2381	20.405	16.027	17.647	9.325	13.277	14.723	11.825	10.908	12.498	11.698	27.929	20.087	13.144	15.821	17.848	15.37	13.584	11.778	13.455	14.701	23.323	11.067	14.514	16.165	21.429	11.959	22.727	16.985	12.991	38.964	29.641	24.615	20.507	19.631	11.673	12.414	11.717	14.976	16.478	12.173		15.2381	15.545	14.118	13.069	9.545	11.58	12.547	13.153
17.1429	20.573	15.484	17.276	9.735	12.419	15.234	11.659	11.433	13.183	11.583	24.536	19.813	13.541	16.014	17.667	15.855	13.505	12.874	14.665	13.897	23.831	11.644	14.306	16.283	22.794	12.364	23.38	16.26	12.834	38.786	29.312	25.056	19.815	18.244	12.1	11.959	11.932	13.795	16.02	12.542		17.1429	16.043	14.696	13.622	9.527	11.285	13.17	12.974
19.0476	20.444	15.279	17.483	9.907	11.811	14.974	11.919	11.553	13.202	11.005	20.815	17.776	13.658	16.986	16.683	16.023	13.52	13.269	17.347	14.505	24.069	11.622	14.847	14.57	22.703	11.769	23.797	16.665	12.349	36.768	27.766	24.538	20.641	17.862	12.502	12.517	12.409	14.277	15.851	12.849		19.0476	15.638	17.025	13.341	9.42	11.839	13.377	12.323
20.9524	23.879	15.265	18.276	9.689	12.419	14.693	11.796	11.284	13.169	11.161	20.22	16.525	12.423	16.793	16	15.595	13.347	12.389	18.533	15.061	23.927	11.719	14.802	13.048	22.291	11.752	23.401	16.295	12.4	37.054	27.383	25.762	20.826	16.906	12.255	12.193	12.957	15.018	15.995	12.034		20.9524	14.973	16.129	13.336	9.375	12.052	12.579	11.857
22.8571	26.634	15.717	18.138	9.887	12.824	14.727	12.128	11.142	12.854	11.146	20.19	16.553	12.144	16.717	16.218	15.231	12.342	11.772	18.802	15.033	23.681	11.852	14.315	12.917	23.011	11.711	23.733	15.575	13.328	39.268	29.023	26.427	20.631	17.019	12.247	11.614	12.946	14.452	15.557	12.43		22.8571	15.366	13.646	13.802	10.33	11.938	12.887	11.958
24.7619	24.853	16.406	17.724	10.497	12.257	15.238	12.318	12.014	12.85	10.828	20.25	16.174	13.297	18.048	15.658	15.081	12.54	11.551	19.419	14.79	23.883	11.896	15.054	12.917	23.457	11.479	24.401	15.04	13.787	39.482	29.32	25.916	21.312	16.694	12.721	12.09	12.513	15.343	15.055	12.983		24.7619	15.529	14.196	12.71	10.152	11.492	12.737	12.021
26.6667	24.828	15.731	17.526	10.318	12.905	15.71	12.024	11.596	13.113	11.38	22.274	15.493	13.171	17.8	15.185	14.555	12.876	12	19.731	14.285	23.23	12.719	15.018	11.391	22.983	11.818	24.497	14.185	13.566	38.643	28.539	24.573	21.5	14.981	12.677	12.703	12.563	17.036	14.791	12.927		26.6667	15.237	13.954	12.134	9.348	12.86	12.279	11.836
28.5714	23.539	15.753	17.569	10.616	13.041	14.97	11.976	12.177	12.62	11.396	24.321	14.703	12.117	16.372	15.218	13.295	12.946	12.407	20.036	14.257	22.867	12.511	14.784	9.443	22.337	12.099	23.588	13.355	13.179	39.911	28.977	24.762	20.732	13.775	11.673	12.241	12.484	15.928	15.005	12.229		28.5714	15.14	13.532	13.318	9.366	14.409	12.599	12.815
30.4762	21.435	15.922	16.578	10.623	12.858	14.987	12.156	15.05	12.869	10.99	22.744	14.712	12.775	15.559	14.794	12.486	13.436	13.198	20.539	14.285	23.081	11.859	15.568	9.439	21.834	11.686	21.882	13.7	12.413	39.625	29.672	25.196	20.111	12.9	11.59	12.007	11.781	14.753	15.02	11.894		30.4762	15.315	12.986	13.857	8.848	13.456	12.874	12.635
32.381	22.767	14.721	15.716	10.02	13.061	15.19	12.147	15.624	12.634	11.292	19.137	15.502	12.793	16.517	15.037	12.017	13.703	13.856	20.09	14.304	22.694	11.163	15.928	9.722	21.28	11.612	21.396	13.96	12.06	37.429	28.68	25.133	20.695	13.031	12.143	11.759	11.735	14.946	14.96	12.33		32.381	15.105	15.879	13.802	8.705	11.876	12.895	12.275
34.2857	25.375	14.767	15.888	9.821	12.095	15.017	10.91	14.851	11.563	11.344	16.589	14.479	11.595	15.703	15.366	11.04	12.96	12.389	18.707	13.897	23	10.348	15.667	9.552	21.811	11.223	21.861	13.05	12.766	53.554	27.25	24.762	20.06	14.019	11.873	11.124	12.172	14.289	14.965	12.385		34.2857	14.669	18.232	13.129	8.821	11.539	12.502	12.55
36.1905	25.664	15.119	16.026	9.642	11.419	15.004	10.706	14.149	11.634	10.495	16.988	13.557	12.586	15.221	14.737	11.364	13.272	12.096	19.222	13.804	23.315	10.533	15.198	10.691	22	12.289	21.722	13.06	12.745	54	28.438	24.825	20.326	13.669	11.394	11.917	11.645	14.066	14.711	12.637		36.1905	15.195	14.979	13.152	8.536	11.497	12.579	11.81
38.0952	24.582	14.963	16.569	9.689	11.635	14.883	11.493	12.851	12.108	10.625	16.685	14.228	14.171	16.6	15.045	11.728	13.738	13.15	19.749	14.308	23.581	11.489	15.369	10.613	21.806	12.38	22.139	13.215	13.119	39.411	29.336	24.636	20.342	12.725	10.92	11.848	11.86	13.94	14.363	12.911		38.0952	15.222	13.661	12.963	8.902	12.031	12.692	12.503
40	22.621	15.196	16.578	9.57	11.804	14.368	12.1	11.936	12.718	10.719	15.363	14.799	13.766	15.641	15.885	11.185	13.03	11.832	19.168	14.061	23.5	11.644	16.91	9.53	21.926	10.777	23.246	13.31	13.472	38.446	28.242	24.035	19.406	12.5	11.052	11.448	12.717	13.831	14.821	12.777		40	15.027	15.111	12.641	9.884	11.788	12.721	13.212
41.9048	20.884	14.941	16.353	9.596	12.169	14.446	12.227	11.922	12.385	10.526	15.274	17.416	12.793	15.524	15.584	11.046	12.733	10.557	17.832	13.963	23.081	10.896	17.117	10.191	22.257	10.769	23.455	14.085	13.528	39.679	27.727	24.329	20.252	12.587	11.602	11.931	12.631	14.717	15.259	13.603		41.9048	15.027	17.475	12.728	9.393	10.855	12.737	12.608
43.8095	20.371	14.95	16.457	9.815	12.865	15.074	11.512	12.106	12.338	10.844	15.107	19.603	13.198	15.703	15.095	13.855	13.223	11.078	18.701	13.883	23.565	11.178	16.946	10.774	22.223	10.711	22.364	13.59	13.302	42.554	27.523	24.042	21.456	13.281	11.912	11.821	11.975	15.187	15.632	13.598		43.8095	14.887	16.961	13.327	8.536	10.938	11.98	12.423
45.7143	21.789	15.785	15.56	9.444	13.324	15.32	11.171	11.532	12.516	11.005	15.22	19.265	13.721	15.4	15.206	17.636	13.743	11.784	18.94	14.21	23.94	12.185	15.928	12.922	22.377	11.157	21.524	13.59	13.306	41.732	28.086	24.35	20.789	13.231	12.721	11.49	12.025	14.494	15.428	12.531		45.7143	14.568	15.068	14.203	7.911	11.176	12.028	12.069
47.619	23.944	15.845	15.802	9.689	13.088	15.519	11.526	11.447	12.38	11.328	14.839	19.26	13.198	15.51	14.844	16.936	13.248	12.928	16.533	15.276	24.129	12.23	15.162	15.743	22.577	11.835	21.005	15.625	13.332	40.411	27.992	24.909	20.379	13.613	13.227	11.386	11.832	13.916	15.403	11.67		47.619	14.082	16.007	13.641	8.188	10.725	11.935	11.503
49.5238	22.819	15.32	17.259	10.04	12.973	14.848	11.488	12.369	12.446	11.302	14.333	18.543	13.036	15.876	14.761	14.393	12.376	13.527	17.323	14.766	23.952	11.83	14.973	15.122	22.617	12.091	21.882	17.91	13.089	39.036	27.555	25.063	20.748	13.969	12.777	11.91	11.835	14.964	15.08	11.458		49.5238	14.467	16.761	12.604	9.018	11.456	11.753	11.873
51.4286	20.435	14.635	17.94	9.616	12.52	14.307	11.815	11.766	12.554	10.755	15.702	17.804	12.225	15.759	15.588	13.295	12.525	12.814	19.03	13.967	23.347	11.326	14.468	13.335	22.503	11.934	22.524	17.64	13.004	38.196	28.148	25.874	19.856	13.688	12.741	12.414	12.491	15.41	14.945	12.542		51.4286	14.51	16.093	12.876	8.92	11.394	11.85	11.989
53.3333	19.888	16.046	16.966	9.258	12.277	14.939	12.474	11.454	12.915	10.87	16.292	16.904	11.351	16.152	16.79	12.422	13.599	12.527	19.766	13.888	23.597	10.667	15.288	12.439	21.686	12.554	21.316	17.305	12.974	39.339	27.758	26.308	19.789	13.369	12.43	12.097	12.29	14.41	15.632	12.821		53.3333	15.097	16.089	14.286	9.188	10.917	11.713	11.698
55.2381	18.849	16.776	15.552	9.265	12.378	14.948	11.758	11.532	12.718	10.849	16.994	15.607	11.279	14.759	16.309	11.838	13.594	12.461	18.737	13.416	23.286	10.533	15.784	11.826	21.954	12.76	21.075	19.52	13.311	42.714	27.297	25.51	20.376	16.644	11.992	12.041	12.111	15.114	15.831	12.346		55.2381	15.233	16.218	14.212	9.429	11.192	11.571	12.524
57.1429	17.866	15.279	15.853	9.788	11.824	14.255	11.645	10.206	12.056	10.786	25.28	15	12.036	12.566	15.366	11.647	13.035	11.796	17.114	13.098	22.806	11.341	15.775	11.765	22.726	12.595	22.46	21.26	12.851	43.464	26.883	24.462	20.708	19.231	12.928	11.834	12.151	15.633	15.642	12.469		57.1429	14.191	16.554	13.806	9.438	10.637	11.773	12.915
59.0476	17.983	15.1	17.017	9.927	11.946	13.866	12.152	9.738	11.69	10.604	27.798	14.849	12.054	14.731	15.313	11.347	12.876	11.772	18.048	13.304	22.94	11.556	15.423	11.474	22.669	13.083	22.701	20.41	13.085	42.554	28.43	25.042	20.423	18.919	12.9	12.2	12.014	14.62	15.234	12.486		59.0476	14.848	16.768	14.184	9.018	11.326	12.263	12.72
60.9524	19.241	15.525	16.793	10.119	12.912	14.87	12.445	11.284	12.207	11.188	23.536	14.804	12.036	15.897	15.543	11.578	13.119	12.066	19.078	14.294	23.593	11.748	16.099	11.687	21.863	12.537	21.701	19.47	13.617	42.661	28.969	25.175	19.983	19.231	11.888	12.669	11.319	14.422	15.527	12.615		60.9524	15.685	16.207	14.055	8.741	12.642	12.502	12.534
62.8571	18.957	16.384	17.078	9.921	13.034	16.364	11.867	12.142	12.948	12.016	21.083	15.365	13.505	13.772	15.403	15.942	13.886	12.401	18.599	15.206	24.524	12.363	16.162	11.948	22.063	12.496	21.433	19.15	13.162	41.25	29.141	23.818	19.866	19.138	12	12.517	11.086	14.747	15.532	12.894		62.8571	15.066	17.364	13.908	9.188	13.275	13.036	12.915
64.7619	19.203	16.484	17.966	9.55	13.385	15.84	11.299	11.766	12.817	12.177	18.28	15.685	13.225	14.579	15.613	17.89	13.658	12.335	18.126	14.21	24.093	12.222	14.414	11.343	22.914	12.992	21.888	18.465	12.664	41.179	30.211	24.517	19.849	18.438	12.454	12.2	11.627	14.705	15.104	12.916		64.7619	14.946	17.132	13.29	9.634	13.554	13.737	12.931
66.6667	20.047	16.338	16.914	10.49	13.98	14.732	12.104	11.865	12.897	12.349	17.024	16.648	12.775	16.662	16.881	15.913	13.861	12	17.952	13.678	23.399	11.919	14.568	11.087	23.469	13.446	21.92	18.565	12.187	41.268	29.148	24.51	20.51	16.975	12.47	11.538	11.932	14.892	15.408	12.352		66.6667	14.837	15.229	13.401	9.607	12.845	12.794	12.296
68.5714	19.164	16.731	15.966	10.397	13.365	14.9	12.787	11.128	12.366	11.74	16.524	18.594	12.694	14.752	16.934	17.468	13.866	12.18	17.299	15.028	24.032	11.696	14.577	10.996	23.623	13.289	22.048	17.5	12.694	40.179	29.82	24.916	20.909	17.219	12.713	11.724	12.211	15.265	15.453	12.413		68.5714	15.035	15.168	14.636	9.464	12.218	12.453	11.974
70.4762	19.224	16.58	15.603	9.742	13.372	15.13	12.834	10.823	12.592	11.531	16.56	19.479	13.306	13.945	16.802	18.185	13.812	12.76	17.611	14.738	24.613	12.393	15.153	10.574	23.12	12.851	22.46	17.15	13.294	41.768	29.867	25.483	20.735	16.237	12.131	12.428	12.194	15.06	15.398	11.849		70.4762	15.953	15.846	15.346	9.911	13.093	13.13	12.169
72.381	22.866	16.059	16.69	9.755	12.838	14.835	12.81	11.901	13.343	11.828	16.03	17.598	13.604	15.421	16.469	15.324	13.584	13.138	18.521	13.799	24.605	12.244	16.225	10.609	23.423	12.537	22.455	17.735	13.157	44.75	28.375	23.692	20.809	15.231	11.606	12.6	11.81	15.12	15.751	11.57		72.381	15.969	15.964	15.35	9.286	13.212	12.615	12.365
74.2857	25.431	15.913	18.129	10.245	12.541	14.788	12.427	14.369	13.324	11.469	15.554	15.872	12.973	13.917	15.905	14.318	13.668	12.204	19.275	14.201	24.258	11.563	15.099	11.37	24.434	12.033	22.668	17.635	12.894	45.232	28.469	23.93	20.849	15.319	12.255	11.986	12.09	15.205	16.333	13.011		74.2857	16.066	15.614	14.783	8.875	12.218	12.81	12.19
76.1905	24.487	16.224	17.362	11.026	12.601	15.268	12.005	16.135	13.282	11.13	14.97	16.557	13.171	15.779	15.51	17.098	13.639	11.749	18.814	14.509	23.552	11.296	16.045	12.678	24.309	12.149	22.353	18.235	12.613	44.018	29.547	24.469	20.534	15.487	12.733	11.49	12.545	14.855	16.557	13.391		76.1905	15.891	16.514	14.401	9.438	11.99	12.595	11.825
78.0952	23.909	16.247	16.629	11.013	11.642	15.71	12.706	14.22	13.296	10.74	13.655	17.32	13.18	16.269	15.481	17.266	13.124	12.79	18.581	14.939	23.871	10.741	16.604	13.991	22.937	12.488	22.316	18.085	12.698	41.964	29	23.629	20.121	16.25	12.426	11.352	12.943	14.735	16.453	12.508		78.0952	16.195	17.375	14.028	9.625	13.005	12.19	12.423
80	21.409	16.338	16.293	10.967	11.919	15.407	13.261	12.95	13.235	10.286	14.304	17.087	12.739	13.083	15.173	13.584	12.975	12.539	18.347	14.907	23.153	10.111	15.64	14.774	22.64	12.529	22.027	16.785	12.6	41.679	28.203	24	20.225	16.656	12.044	11.303	12.735	14.687	16.333	12.19		80	16.268	16.711	13.419	9.509	13.617	12.826	12.45
81.9048	19.405	15.384	15.914	11.384	12.77	14.926	12.915	12.255	13.188	10.698	16.363	17.831	12.243	13.51	14.889	12.249	12.762	12.281	16.988	14.444	22.359	9.756	15.216	14.613	22.817	12.826	22.011	15.81	13.217	41.893	29.227	25.147	19.866	16.819	12.116	11.593	12.652	15.012	16.05	12.732		81.9048	15.65	16.461	14.521	9.759	12.13	12.741	12.386
83.8095	19.879	14.47	16.517	11.629	12.601	15.03	12.825	11.071	13.61	11.766	18.22	18.525	12.829	15.517	15.111	12.491	13.223	12.784	17.03	15.037	23.976	10.978	16.054	13.939	23.04	12.793	22.385	14.725	13.766	41.071	28.922	25.503	20.144	16.531	12.633	11.986	12.746	14.458	15.159	13.151		83.8095	15.249	16.35	14.742	10.696	11.171	13.17	12.651
85.7143	19.017	14.927	17.112	11.715	12.372	14.939	11.754	10.943	13.207	11.188	24.815	18.219	13.342	14.938	15.272	14.682	13.277	12.263	17.413	15.682	24.601	11.533	16.153	12.813	22.303	11.702	21.524	13.97	13.085	40.982	27.984	24.727	20.262	15.644	12.096	12.172	11.907	14.217	15.1	12.57		85.7143	14.428	15.307	13.369	10.241	12.269	13.308	12.365
87.619	18.341	14.142	16.81	11.735	12.547	15.221	11.512	11.397	12.526	11.203	29.571	18.712	12.315	13.09	15.107	17.711	12.926	12.12	16.796	14.841	23.343	10.556	14.91	11.952	21.474	10.942	21.77	13.955	13.064	41.607	26.836	23.874	19.493	15.388	11.434	11.786	11.95	14.904	15.09	12.408		87.619	14.518	15.636	13.811	8.929	11.705	12.587	12.524
89.5238	18.418	14.374	16.983	10.921	11.932	15.177	12.009	11.411	13.216	11.583	26.315	18.909	12.162	15.345	15	17.197	13.668	12.802	16	13.486	23.351	10.022	15.324	11.97	20.766	11.397	22.246	13.32	13.426	42.982	26.117	23.979	19.527	16.269	11.944	11.386	12.824	15.151	15.134	12.123		89.5238	15.584	16.664	14.571	9.107	10.736	12.725	12.54
91.4286	18.237	15.543	17.164	11.417	12.27	14.649	11.483	10.73	13.714	11.453	21.911	19.658	13.279	15.869	15.514	15.509	13.98	12.754	16.263	14.206	23.94	10.741	16.829	11.852	21.189	12.231	21.647	13.105	13.523	43.089	26.648	25.483	19.661	16.631	12.219	12.124	12.616	15.024	16.09	12.497		91.4286	16.3	17.043	14.143	9.821	10.679	12.988	12.407
93.3333	18.892	15.247	17.371	12.834	13.466	14.939	11.076	10.355	13.225	11.604	19.524	20.169	13.45	14.131	15.374	15.006	13.322	12.605	18.246	15.257	23.77	11.733	16.793	11.696	21.926	12.76	21.754	13.535	13.489	43.554	28.125	25.35	20.225	15.381	12.47	12.786	12.011	14.572	15.816	12.408		93.3333	15.498	16.8	14.005	10.116	10.28	12.753	11.413
95.2381	19.203	14.808	16.983	12.331	12.635	14.463	10.995	10.695	12.366	11.828	20.024	19.457	12.928	16.345	14.942	16.682	13.693	12.359	18.521	15.042	23.649	12.333	15.847	11.022	21.611	12.744	20.674	13.935	13.153	44	29.383	24.308	20.681	13.756	11.924	13.007	11.971	14.367	14.94	12.575		95.2381	15.054	16.2	13.696	9.732	10.316	12.563	11.55
97.1429	18.621	14.219	16.75	11.96	12.236	14.714	11.9	11.433	12.296	12.026	21.565	18.909	13.342	15.586	15.56	18.104	13.673	12.15	18.844	14.715	23.06	12.785	15.243	10.626	22.069	12.413	20.84	14.195	12.962	43.268	30.617	24.825	20.779	13.444	11.554	12.593	12.541	14.295	15.259	13.385		97.1429	15.584	15.396	13.687	10.018	10.855	12.931	12.058
99.0476	18.241	14.014	16.25	11.43	13.216	15.372	12.616	10.624	13.019	10.74	22.845	18.658	13.009	12.034	14.897	16.52	13.441	12.126	18.377	13.995	22.879	11.941	15.523	10.935	21.297	12.041	21.102	13.73	12.613	41.179	30.359	25.587	20.211	12.275	11.797	12.117	12.086	14.843	15.119	12.989		99.0476	15.588	14.407	13.29	9.795	10.679	12.7	11.148
100.952	18.815	14.584	15.974	10.377	12.547	14.857	12.062	10.248	12.521	10.885	24.125	19.091	11.369	11.297	13.942	15.225	13.886	12.126	16.006	13.589	23.25	11.622	16.135	12.178	21.183	12.521	21.134	13.225	12.57	40.25	28.719	25.301	19.023	11.8	11.012	12.648	11.649	14.916	14.224	12.503		100.952	16.047	14.414	12.59	9.705	10.912	12.279	12.106
102.857	21.97	14.781	16.457	11.06	11.777	14.688	11.299	9.887	11.836	11.281	22.607	19.132	11.919	14.448	14.667	14.803	13.535	12.12	16.868	13.883	23.964	11.933	17.414	13.317	21.834	19.041	22.15	12.485	13.128	39.625	28.891	23.601	18.597	12.369	10.614	12.283	11.789	14.608	13.905	12.235		102.857	15.996	16.139	13.364	9.946	10.922	12.903	12.921
104.762	23.366	15.986	17.56	11.417	12.899	15.039	11.455	10.39	12.676	12.109	20.94	17.858	13.18	16.131	15.066	17.572	13.698	12.072	17.665	14.229	25.403	11.207	17.901	13.643	21.989	26.934	22.203	12.53	13.294	37.768	28.609	23.559	19.208	12.256	11.614	11.407	11.416	14.054	14.383	11.983		104.762	15.872	17.157	14.217	9.259	10.756	13.713	12.603
106.667	23.06	16.932	17.957	11.351	13.642	14.628	11.564	12.021	12.995	12.703	19.756	17.114	13.297	14.11	14.449	17.705	13.589	12.198	16.527	13.794	26.722	11.526	16.18	13.965	23.434	27.496	21.979	13.525	12.962	37.589	28.586	24.441	19.936	11.863	11.96	11.724	11.828	13.639	15.214	12.838		106.667	15.545	16.129	14.392	9.634	11.839	13.462	12.354
108.571	23.836	16.489	16.81	11.563	12.905	14.022	11.744	11.801	12.498	11.729	19.583	16.849	13.126	15.69	15.033	15.301	12.916	12.198	16.467	13.631	28.609	12.496	16.658	13.065	23.777	24.322	21.16	13.895	12.66	37.554	28.5	24.769	19.953	12.081	11.402	12.2	12.258	14.434	15.662	13.168		108.571	16.171	15.996	14.475	10.223	13.425	12.964	12.286
110.476	23.595	15.936	16.897	11.921	13.277	14.766	11.976	11.156	12.418	11.271	19.595	16.438	13.072	15.793	16.469	16.052	13.168	12.599	17.838	14.196	30.323	12.141	16.874	11.165	23	20.008	20.866	13.445	12.574	39.107	27.836	25.455	19.765	12.656	11.255	12.303	12.065	14.765	15.279	12.251		110.476	16.339	16.889	14.419	9.973	14.026	12.704	12.201
112.381	22.698	15.146	17.474	11.377	13.48	14.775	11.645	11.177	12.77	11.286	18.363	16.466	14.162	13.966	15.728	17.058	13.663	12.527	18.269	14.692	32.097	10.756	16.225	10.809	23.451	15.826	21.888	13.4	12.664	39.446	28.289	24.531	19.96	12.931	11.538	11.979	12.075	14.867	14.97	12.128		112.381	15.475	16.2	14.253	9.634	13.275	12.648	12.677
114.286	21.203	15.146	16.845	10.536	12.764	14.571	11.389	11.418	12.615	11.615	16.726	16.342	14.901	15.793	14.975	16.746	14.074	11.647	18.994	14.776	33.754	10.859	16.865	10.717	23.651	14.058	22.037	13.665	13.06	38.554	27.836	23.734	19.275	13.219	11.793	12.29	12.656	14.958	15.174	12.274		114.286	16.047	16.2	14.516	9.045	12.44	13.494	12.968
116.19	20.737	15.059	16.328	10.768	13.088	14.974	11.332	11.085	12.845	11.052	15.518	15.735	13.486	15.745	15.379	15.208	12.955	11.94	19.299	14.229	42.556	10.741	15.946	10.513	23.931	14.455	21.091	13.36	12.753	40.071	26.875	25.105	19.218	12.675	11.673	12.338	12.875	14.843	15.313	12.039		116.19	15.84	16.411	14.553	9.143	11.725	13.105	12.365
118.095	20.621	15.183	16.638	10.411	13.73	14.779	11.327	10.39	13.183	10.49	15.542	14.858	13.243	16.138	15.745	16.277	12.025	12.335	18.467	14.668	60.476	10.207	15.126	10.865	25.394	14.017	21.642	13.22	12.57	44.714	27.102	24.35	19.477	12.75	12.1	12.448	12.771	14.849	16.114	12.944		118.095	14.708	15.639	14.032	9.223	11.824	12.279	12.709
120	19.832	15.817	16.94	10.166	13.736	14.913	11.796	10.986	12.521	10.917	14.714	15.247	13.64	16.297	15.926	18.387	13.287	12.263	16.91	14.388	68.931	9.77	16	11.061	26.023	12.314	22.396	13.68	12.86	43.429	27.609	23.14	19.198	13.694	12.661	13.138	12.022	14.114	15.96	13.726		120	14.568	15.614	13.267	8.83	12.13	12.081	12.534
121.905	19.422	16.521	17.069	10.576	13.264	15.225	11.844	11.333	12.648	11.271	14.631	15.822	13.288	14.966	16.086	16.855	14.01	11.982	17.347	14.402	66.407	11.23	17.468	10.517	25.571	11.636	22.358	14.16	13.272	39.696	27.789	24.804	19.453	12.962	12.562	12.441	12.376	14.181	15.488	12.648		121.905	14.7	15.775	14.12	9.179	11.637	12.567	12.37
123.81	19.073	16.027	16.414	10.185	13.345	15.268	11.607	10.319	12.789	11.891	14.524	15.457	12.297	15.703	15.827	13.572	13.723	11.515	18.21	14.215	61.645	17.504	16.892	10.109	28.2	11.917	20.604	14.02	12.834	41.661	27.484	25.266	19.282	12.294	11.753	12.8	12.688	15.193	15.786	12.721		123.81	15.179	16.132	14.567	8.723	11.088	12.717	13.159
125.714	18.466	15.763	16.69	10.338	13.601	14.537	12.028	10.369	12.582	11.635	14.065	16.621	11.973	14.779	15.193	12.283	13.678	11.946	16.725	12.967	56.855	21.63	15.036	9.63	29.16	11.967	20.037	16.145	12.123	40.786	28.641	25.056	19.104	12.331	11.159	12.759	12.416	14.127	14.677	12.827		125.714	15.595	16.314	14.18	8.545	11.358	12.3	13.159
127.619	17.806	15.388	16.784	10.695	13.507	14.364	11.953	10.532	12.362	10.745	14.042	17.374	13.64	15.662	14.745	13.913	13.609	11.647	16.138	12.715	50.766	20.815	15.874	9.448	27.354	12.124	21.31	18.685	12.511	38.964	28.352	25.413	19.648	12.262	12.044	11.876	12.398	13.747	14.015	12.117		127.619	15.086	16.439	14.774	9.366	11.912	12.599	12.471
129.524	17.556	14.612	16.422	10.616	12.926	14.749	11.559	10.34	12.357	10.807	13.899	15.986	13.613	16.152	14.963	17.457	13.158	11.922	17.293	13.458	45.286	20.37	16.937	10.039	26.486	12.256	21.037	18.585	13.026	37.893	26.711	25.413	19.221	12.062	12.422	11.862	12.251	14.325	14.647	12.235		129.524	14.767	17.411	14.373	9.616	12.078	12.121	12.889
131.429	17.707	15.32	16.621	10.596	12.622	13.805	11.754	10.582	12.174	10.865	13.298	14.881	12.64	15.972	14.848	17.532	12.554	12.521	17.725	13.921	41.698	20.015	16.622	10.343	27.246	11.884	20.519	17.64	12.404	38.143	26.039	24.238	19.396	11.944	11.538	11.545	11.892	14.452	14.164	12.43		131.429	15.008	16.821	14.065	9.429	11.404	11.765	12.899
133.333	18.125	15.073	16.069	9.735	12.791	13.061	11.308	10.496	12.136	10.771	13.351	14.986	12.144	15.648	13.971	15.775	12.619	12.186	17.012	13.673	36.927	18.215	16.297	9.896	28.743	11.793	19.957	16.27	11.791	42.357	26.016	23.182	19.983	14.969	10.542	11.034	11.556	13.771	13.915	12.078		133.333	15.117	15.593	14.714	9.625	11.492	12.781	12.307
135.238	18.621	14.521	16.767	10.046	13.23	13.558	11.626	10.461	12.15	11.151	13.994	14.963	12.387	14.676	14.984	16.364	12.98	11.659	16.91	14.341	34.504	16.452	16.694	10.283	28.731	11.471	19.652	15.71	12.009	41.661	26.305	24.273	20.007	18.5	10.948	10.945	12.186	14	15.1	12.19		135.238	15.237	16.882	15.217	9.42	11.326	13.364	12.159
137.143	23.103	14.621	16.957	11.437	13.385	13.948	12.379	11.184	12.376	11.75	14.119	15.306	13.144	15.172	15.959	17.11	13.277	11.964	16.281	14.603	31.359	14.311	17.342	11.109	26.377	10.76	21.021	16.34	12.421	39.964	25.547	24.35	19.53	18.806	11.924	11.497	11.968	14.789	15.413	11.983		137.143	15.109	17.196	14.396	8.875	10.518	12.389	12.407
139.048	24.72	14.735	16.353	10.861	13.209	13.857	11.265	10.993	12.779	11.078	14.625	15.735	12.288	15.469	15.914	16.491	13.347	12.401	16.695	14.556	28.306	11.889	16.541	13.391	24.897	10.512	21.706	16.03	12.489	41.286	26.406	24.776	19.151	18.862	11.482	12.021	11.011	14.958	15.264	11.771		139.048	15.035	16.382	13.77	8.92	10.912	11.757	12.566
140.952	21.112	15.498	16.172	9.483	12.568	14.043	10.967	10.574	12.277	10.568	13.649	15.26	11.514	15.297	15.556	15.78	12.985	11.659	17.593	14.364	27.601	10.422	14.793	15.857	26.257	11.339	20.273	15.72	12.213	42.232	28.227	25.245	19.762	18.681	10.697	12.8	10.978	14.729	15.368	12.274		140.952	14.981	15.136	14.765	10.036	11.041	12.47	12.73
142.857	20.565	14.909	16.086	10.503	12.27	14.069	11.63	11.05	12.164	10.609	13.708	16.169	12.054	14.455	15.572	15.798	12.906	11.677	17.126	13.528	26.181	10.015	15.009	14.17	25.749	11.983	20.225	15.73	11.911	41.714	28.477	24.21	19.46	19.131	11.096	12.759	11.613	13.765	15.363	12.05		142.857	14.665	14.05	14.654	10.446	11.42	12.502	12.455
144.762	19.888	14.269	16.698	11.523	12.534	14.108	11.877	10.915	12.939	10.531	14.613	16.306	12.423	14.503	15.934	16.549	12.05	12.97	16.353	13.785	24.673	10.696	16.054	12.265	24.269	13.207	21.043	15.195	12.06	38.393	26.289	25.035	19.554	19.9	11.693	12.11	12.125	13.747	14.915	12.715		144.762	14.883	14.354	14.866	9.607	11.264	12.32	12.101
146.667	18.724	14.712	16.155	10.589	12.426	13.827	11.82	10.362	12.859	11.083	14.577	15.064	12.252	15.545	15.539	17.092	11.673	12.892	16.263	14.313	24.815	11.267	15.649	11.091	22.103	13.107	21.321	14.5	12.515	39.589	25.875	24.755	20.178	18.819	11.849	11.993	12.176	14.639	13.831	12.553		146.667	15.132	15.911	16.309	9.321	11	12.462	12.582
148.571	18.147	15.055	15.819	10.51	12.5	13.961	11.853	10.298	12.507	11.703	15.119	14.42	12.315	16.324	15.535	16.272	12.396	11.377	15.665	14.626	24.137	11.096	15.838	9.935	20.6	12.033	21.497	13.815	12.774	41.589	26.078	24.629	19.574	18.044	11.661	10.869	11.477	14.536	13.96	11.715		148.571	15.358	16.389	15.272	9.562	11.104	12.814	12.958
150.476	18.341	15.005	17.052	10.709	12.75	14.307	12.175	10.95	13.3	11.583	18.131	15.315	12.928	17.021	15.152	15.919	13.257	11.784	16.563	14.958	24.246	12.148	17.315	10.213	21.646	12.289	20.38	13.255	12.753	40.679	25.758	24.063	19.359	18.119	11.681	11.041	11.039	14.114	14.458	12.078		150.476	15.284	15.254	14.097	9.241	10.912	13.364	13.233
152.381	19.211	14.621	17.233	10.748	12.541	14.61	12.223	12.298	13.446	11.208	28.161	15.986	12.775	16.614	14.733	16.341	13.738	12.97	18.677	15.248	25.415	13.496	19.414	9.917	22.109	12.264	20.358	13.285	12.923	39.089	28.258	23.035	20.027	18.506	12.151	12.048	11.237	14.663	14.97	11.81		152.381	14.735	14.643	13.922	8.786	11.415	13.126	12.159
154.286	18.297	14.598	16.621	11.258	11.838	15.887	12.659	13.348	13.535	10.911	30.47	15.242	13.171	16.669	14.374	17.439	13.46	13.138	17.952	14.869	23.859	12.807	17.685	9.735	22.531	12.364	21	13.59	12.932	37.893	29.992	23.664	20.46	18.788	12.251	11.662	11.559	15.223	15.517	12.33		154.286	14.953	14.936	14.198	9.339	12.073	12.838	10.847
156.19	18.819	14.078	16.207	10.689	12.473	15.706	12.341	14.078	13.239	11.005	22.738	15.918	13.36	17.614	15.267	17.087	13.762	13.479	16.563	14.636	22.831	12.163	16.577	10.504	23.331	12.645	20.567	13.475	13.468	39.321	28.203	23.825	19.708	19.587	12.04	11.317	11.774	15.614	15.562	13.302		156.19	15.136	15.886	14.41	9.232	11.404	12.113	11.011
158.095	20.155	13.954	16.259	10.596	12.541	15.074	12.009	15.319	11.803	11.536	19.423	17.452	13.171	17.572	16.3	16.064	13.658	12.641	16.006	14.593	23.262	11.548	18.955	9.904	21.291	12.306	20.332	13.34	12.681	40.571	27.008	24.224	19.171	19.306	12.574	11.703	11.333	15.783	15.642	12.682		158.095	15.335	15.507	13.53	8.714	10.622	11.615	12.127
160	18.263	14.562	16.871	10.477	11.858	14.589	11.796	14.277	11.324	11.245	17.923	16.84	13.108	16.876	15.399	15.659	13.337	11.707	16.725	13.617	23.185	11.541	19.072	9.361	20.417	11.826	20.556	13.425	12.085	39.964	27.133	23.713	19.859	18.7	12.227	12.186	11.118	14.964	14.9	11.732		160	15.86	15.396	13.548	8.911	10.819	12.271	13.159
161.905	17.159	14.831	16.103	10	11.878	14.312	11.128	13.043	11.385	10.906	16.798	15.466	12.108	16.062	14.741	14.006	13.332	11.904	16.677	12.86	22.935	11.437	17.171	9.5	20.566	11.256	20.209	13.355	12.545	39.536	26.352	23.678	19.574	18.913	11.622	11.676	10.86	13.855	14.154	11.14		161.905	14.911	16.025	14.673	8.884	11.554	12.3	12.714
163.81	17.802	15.041	15.948	10.735	12.703	14.727	11.19	13.688	11.606	10.24	16.804	15.128	12.099	14.669	15.502	13.705	13.371	12.623	15.844	13.009	23.371	10.57	15.162	10.091	20.869	11.372	20.07	13.56	12.421	41.625	26.633	24.308	19.386	18.231	12.155	12.221	10.728	13.578	15.413	11.693		163.81	14.576	15.55	14.885	9.705	12.145	12.846	12.212
165.714	21.935	16.16	16.241	10.675	13.973	13.589	11.118	12.922	12.178	9.802	16.964	15.215	13.171	13.724	15.889	15.717	13.495	12.389	15.689	13.603	23.355	10.622	16.423	11.148	22.017	11.686	20.567	13.71	12.481	43.696	26.953	24.524	19.671	18.319	11.622	12.621	11.602	14.247	15.473	12.341		165.714	14.654	15.411	14.101	9.848	12.653	13.223	12.016
167.619	24.017	15.726	15.879	10.623	14.054	13.017	11.251	12.355	12.507	10.38	17.625	15.434	13.568	16.021	15.259	16.451	12.955	12.222	16.455	14.14	22.762	10.926	19.18	10.726	21.754	12.116	20.604	13.485	13.145	42.482	26.391	24.566	19.866	19.181	12	12.538	11.566	14.807	14.562	12.313		167.619	15.125	16.114	13.627	8.973	13.036	12.765	12.46
169.524	22.078	14.877	15.871	10.51	14.223	13.519	11.455	12.27	12.319	10.458	17.899	14.411	13.09	16.09	15.148	14.41	13.178	12.168	17.281	13.771	22.891	11.444	19.532	10.404	21.326	11.455	20.283	13.155	13.379	42.679	26.109	24.573	19.191	17.956	11.741	11.759	11.333	14.12	15	12.212		169.524	15.521	16.664	13.341	8.393	12.56	12.741	12.608
171.429	22.121	15.374	15.397	10.795	15.088	13.19	11.336	11.794	11.897	10.505	18.524	14.731	12.577	13.276	15.626	11.994	13.213	11.311	16.952	13.579	22.403	11.8	18.081	11.383	22.206	10.769	20.086	12.605	12.383	43	25.594	24.608	18.299	16.369	10.558	11	11.473	13.229	13.861	11.654		171.429	15.393	16.075	14.189	8.92	12.316	12.644	11.757
173.333	22.75	15.584	15.534	10.755	14.243	13.303	11.137	11.34	11.695	11.438	20.899	15.612	12.477	14.972	15.185	10.884	12.653	12.168	16.653	14.145	22.415	10.815	17.775	13.13	24.246	11.463	19.765	12.19	11.421	41.196	26.008	24.51	18.762	16.7	11.088	11.759	11.473	12.512	14.254	11.575		173.333	14.763	15.35	13.866	9.554	12.637	12.166	11.635
175.238	22.453	15.315	15.664	10.629	14.446	13.784	11.028	11.759	11.845	11.146	21.72	15.37	12.477	15.917	15.029	10.734	12.609	12.898	15.431	13.879	22.891	10.222	16.901	13.839	23.434	11.124	20.326	12.515	11.115	41.304	26.938	24.168	19.584	15.906	11.59	11.655	11.122	13.367	15.453	12.291		175.238	14.595	15.457	13.207	8.946	12.71	12.271	12.497
177.143	21.267	15.47	15.94	10.861	15.426	14.143	11.133	12.255	12.423	10.391	22.714	15.676	13.459	14.028	15.416	11.509	12.629	12.701	13.79	13.925	22.823	11.459	14.91	12.761	22.703	11.471	21.037	12.65	11.766	40.929	26.445	23.175	19.97	16.138	11.594	11.648	10.348	14.831	14.95	12.899		177.143	14.988	15.421	13.857	8.562	12.176	12.15	12.788
179.048	20.427	15.402	16	9.768	14.696	13.714	11.408	10.801	12.376	10.797	23.339	15.607	12.414	14.386	14.77	11.786	12.49	12.449	12.749	13.925	23.323	11.422	15.351	11.926	23.697	12.405	20.187	12.405	12.14	39.411	26.344	23.392	19.372	17.425	11.546	12.269	10.832	14.548	14.91	13.168		179.048	14.432	15.564	14.115	9.205	11.409	12.251	12.974
180.952	19.349	14.374	15.905	9.715	13.932	13.861	11.81	11.596	12.07	11	21.173	14.671	10.829	15.138	14.263	12.52	12.322	12.198	12.737	13.916	23.919	10.193	16.82	11.539	23.017	11.736	20	12.59	11.655	38.554	26.484	23.804	19.037	16.644	11.586	12.021	11.136	13.958	15.01	13.156		180.952	14.856	15.843	14.415	9.054	11.389	12.267	12.503
182.857	19.069	14.265	16.776	9.874	13.615	14.216	11.559	12.312	12.005	11.375	18.839	15.087	12.649	16.269	14.531	16.879	12.446	12.144	12.916	13.869	23.081	11.193	16.919	10.878	22.274	11.612	19.882	13.15	12.613	40.179	26.281	24.028	19.174	15.413	11.721	11.862	10.986	14.211	14.607	12.609		182.857	15.813	15.196	14.106	9.562	11.969	12.943	11.931
184.762	18.017	15.16	16.267	9.397	13.953	13.905	11.806	11.518	12.052	11.333	17.399	15.342	13.306	16.331	14.848	17.318	12.896	11.677	12.683	13.327	21.935	12.007	16.018	10.817	22.76	11.719	19.332	13.37	12.655	41.768	26.367	23.594	19.097	14.744	11.558	12.441	11.398	14.729	14.02	12.251		184.762	16.012	14.561	13.756	10	12.28	12.968	12.243
186.667	17.297	14.274	16.086	8.921	13.615	14.463	11.417	12.894	12.366	10.573	16.762	14.854	12.135	14.048	14.222	14.445	12.327	11.467	12.234	12.944	21.762	11.348	15.82	10.722	22.257	10.628	20.016	13.615	12	39.661	26.711	23.545	19.802	14.706	11.645	11.91	11.376	15.169	14.323	12.542		186.667	15.463	15	13.816	9.196	11.788	11.96	12.048
188.571	17.72	13.356	16.569	9.43	13.122	14.468	10.953	13.823	12.892	10.047	15.988	16.215	12.063	12.766	14.449	13.405	12.139	11.778	12.03	13.271	22.5	10.511	15.667	10.096	21.686	11.471	20.005	14.155	12.438	40	26.844	24.371	19.685	13.837	11.554	11.09	11.369	14.578	15.358	12.927		188.571	14.685	15.514	13.853	8.643	11.259	12.255	12.222
190.476	17.159	14.1	15.974	9.636	12.466	13.723	12.019	13.539	12.531	9.302	14.613	16.763	12.459	13.566	15.506	15.017	12.698	11.88	12.677	13.28	22.867	10.689	15.108	9.478	21.863	12.198	19.642	13.51	12.587	41.875	26.164	24.084	18.926	13.019	11.06	11.614	11.29	13.548	15.06	12.754		190.476	14.693	16.286	13.972	8.545	11.632	12.98	12.667
192.381	17.625	14.155	16.328	9.192	12.203	12.853	12.223	12.872	12.286	9.562	14.131	16.014	11.459	14.207	15.198	16.717	13.03	12.048	13.407	13.449	22.036	10.881	15.964	9.63	21.726	11.504	20.679	13.255	12.596	39.768	25.867	23.923	19.406	13.144	11.47	11.428	11.412	13.506	14.124	12.754		192.381	15.019	15.932	13.77	8.911	11.922	12.769	13.238
194.286	18.345	14.635	16.612	9.503	12.189	16.805	11.929	12.915	12.521	10.453	14.464	15.329	10.342	13.359	15.07	15.613	13.074	12.329	13.036	14.402	21.976	10.363	15.91	10.648	20.269	10.95	20.481	13.22	12.472	38.857	26.555	24.252	19.795	13.031	12.028	11.359	11.541	13.982	14.393	12.531		194.286	15.482	14.818	14.023	8.696	11.249	11.858	13.312
196.19	21.875	14.584	15.81	9.709	12.182	21.022	11.488	13.525	12.582	10.333	13.911	14.858	11.333	14.193	15.321	14.48	13.733	13.222	13.012	14.313	22.907	10.563	14.324	10.713	19.366	11.628	20.182	13.745	12.779	38.357	26.719	24.378	19.651	12.488	11.904	11.738	11.097	15.693	14.592	12.654		196.19	15.677	15.218	14.986	8.795	10.995	12.648	12.921
198.095	23.672	15.461	15.379	9.954	11.865	21.606	11.839	12.993	12.746	10.995	13.542	15.151	12.396	14.669	15.572	13.879	14.163	12.743	14.024	14.065	22.129	10.111	14.018	10.796	19.72	11.678	19.829	13.9	12.545	36.893	26.477	25.329	19.839	12.244	11.044	12.241	11.194	16.898	14.781	12.899		198.095	15.545	15.511	14.834	9.25	11.689	13.494	13.026
200	20.922	15.968	15.948	10.351	11.432	23.736	12.564	13.95	12.178	11.276	13	15.146	12.676	13.69	15.56	13.717	13.356	11.599	15.683	14.192	21.177	10.185	14.18	10.691	19.577	10.942	19.861	14.585	12.085	39.107	27.188	24.545	19.765	11.719	10.745	12.4	11.211	14.795	14.791	11.95		200	15.14	15.05	14.267	9.098	11.244	12.923	13.254
201.905	20.81	14.991	16.353	10.351	11.932	24.264	12.213	14.83	11.873	10.385	13.107	14.804	13.018	14.393	14.909	14.873	13.495	11.749	17.078	14.093	21.476	10.822	14.883	12.261	20.251	10.736	19.781	16.945	11.757	39.625	26.75	24.175	19.077	11.894	11.275	11.214	11.409	12.97	14.279	11.302		201.905	15.043	14.843	13.157	8.973	11.321	12.316	12.598
203.81	22.043	15.986	16.276	9.927	11.804	21.537	12.109	14.064	12.122	10.26	13.161	14.799	13.577	14.566	14.243	16.532	12.995	11.922	18.251	13.706	21.238	10.489	15.919	14.835	21.731	9.802	19.059	18.155	11.791	38.5	26.219	24.811	19.597	12.506	11.821	11.241	12.075	13.41	14.423	12.391		203.81	14.805	14.764	13.714	9.098	11.119	12.741	12.328
205.714	21.948	16.123	16.233	9.709	11.581	18.476	12.019	13.17	12.117	10.464	12.619	14.977	12.829	14.793	14.617	16.451	12.559	11.557	18.18	13.332	21.661	10.185	14.595	14.548	24.491	10.355	19.77	19.035	12.298	42.161	26.367	24.545	20.242	11.875	11.964	12.262	11.731	13.861	14.517	12.888		205.714	14.35	15.393	15.327	9.795	11.57	13.441	12.45
207.619	21.065	15.306	16.164	10.06	11.716	16.511	11.867	14.128	12.263	10.396	14.125	16.292	11.901	14.848	15.263	15.699	13.054	11.407	18.186	13.07	21.79	10.496	14.459	12.922	25.434	11.256	21.037	18.285	12.898	41.929	27.18	24.895	20.268	11.55	11.837	12.49	11.746	13.663	14.97	12.151		207.619	14.922	16.096	14.783	9.955	12.389	12.964	12.201
209.524	20.181	15.178	16.112	9.894	11.98	15.255	11.436	15.348	12.681	10.24	14.655	16.032	12.541	13.91	14.984	15.208	13.168	12.269	18.778	13.187	22.177	10.659	16.045	12.23	24.811	11.669	21.203	17.3	12.987	39.357	26.539	25.154	20.366	12.738	11.948	11.966	12.122	14.096	15.08	11.989		209.524	15.296	16.589	14.258	9.339	11.601	12.227	12.243
211.429	19.405	15.589	16.871	9.397	12.284	14.472	10.573	14.326	12.352	10.12	14.268	14.995	12.063	14.379	14.84	14.728	13.421	11.886	18.892	13.696	22.258	10.393	16.973	11.639	24.914	11.901	20.134	18.08	12.749	40.607	25.625	25.245	20.359	14	12.183	12.752	11.824	14.241	14.657	12.469		211.429	15.607	15.625	14.088	8.714	10.922	12.919	11.926
213.333	18.142	15.781	16.267	9.503	12.75	14.251	10.938	13.362	12.286	9.714	14.131	15.393	11.955	14.483	15.074	15.983	13.03	11.473	18.868	13.771	21.411	10.193	17.495	10.53	24.2	11.57	20.551	18.11	12.404	41.429	26.328	24.252	20.604	13.494	11.534	12.648	11.473	14.018	15.035	12.587		213.333	15.078	14.868	13.94	8.42	10.756	12.87	12.783
215.238	17.125	14.589	16.431	9.159	13.054	14.264	11.175	14.319	12.704	10.349	13.673	16.064	12.45	13.814	15.708	17.179	13.649	12.545	18.952	14.084	21.468	10.681	15.991	10.278	23.091	12.19	21.043	16.595	12.417	40.036	26.336	24.042	20.158	12.681	11.641	11.345	11.616	14.434	15.308	12.374		215.238	15.21	15.482	13.995	7.759	11.244	12.134	13.159
217.143	17.013	13.196	16.448	8.364	12.696	13.983	11.062	13.426	12.343	10.516	13.405	15.795	12.55	13.407	16.16	15.185	14.119	12.461	18.826	14.14	22.024	10.948	13.766	10.261	22.76	13.694	21.021	15.725	13.102	38.429	26.688	25.217	20.097	12.35	12.363	11.772	12.093	15.102	15.085	12.52		217.143	15.611	15.104	13.959	7.768	12.016	12.077	12.323
219.048	16.422	13.187	15.448	8.901	12.77	13.541	11.185	12.688	12.211	10.495	14.47	15.306	12.514	13.855	15.712	13.659	14.203	12.329	18.138	13.612	22.633	10.896	14.505	10.035	21.663	13.537	20.829	16.58	12.26	40.625	26.93	25.385	20.584	12.4	12.359	12.579	11.925	15.084	14.254	12.631		219.048	15.424	15	13.935	9.768	11.886	12.587	13.159
220.952	17.052	14.584	16.103	9.199	15	13.61	11.09	14.333	12.606	10.333	16.423	14.831	12.703	13.49	14.864	13.069	16.351	12.731	17.653	13.252	22.274	11.141	14.955	10.065	20.331	12.488	20.497	16.59	11.506	41.089	27.523	24.902	20.644	13.125	12.251	12.952	11.559	14.952	14.751	12.536		220.952	15.016	14.964	14.143	9.768	11.083	12.907	12.82
222.857	17.457	15.037	17.207	8.735	22.527	13.632	11.341	14.248	12.052	10.562	23.589	14.644	12.432	12.945	14.486	12.994	17.728	12.922	16.731	13.126	21.452	10.726	15.856	9.87	19.777	11.149	20.46	13.865	12.034	39.804	27.914	25.084	19.725	13.788	11.45	12.434	11.115	14.289	14.507	11.67		222.857	14.607	14.707	14.276	8.616	11.036	11.899	11.683
224.762	17.651	14.749	17.784	9.457	29.128	13.684	11.223	13.433	11.728	11.349	27.423	15.511	12.216	14.593	15.44	14.723	17.371	12.701	17.246	13.098	21.504	10.807	15.892	10.17	19.794	10.736	20.209	12.275	12.549	40.161	26.375	23.469	19.742	17.163	11.124	12.524	10.692	14.139	13.627	11.335		224.762	14.533	15.536	14.157	8.42	12.176	12.077	11.608
226.667	19.634	13.95	18.026	9.629	30.635	14.147	11.427	13.106	12.352	10.854	22.405	16.457	12.054	14.434	16.025	15.353	17.693	12.737	17.443	13.724	21.75	11.704	14.748	10.578	20.886	11.942	20.711	13.105	12.6	40.696	25.844	23.007	20.577	19.481	11.821	12.966	11.172	14.789	14.438	12.587		226.667	14.623	15.646	14.046	7.902	13.145	12.769	11.862
228.571	21.802	13.877	18.216	9.623	31.297	14.437	11.09	14.326	12.563	10.74	21.952	16.534	11.117	13.6	15.877	14.613	17.485	13.509	18.431	14.804	21.952	11.163	15.559	11.117	20.714	12.025	20.358	12.92	12.485	40.179	28.234	24.783	20.312	19.013	12.247	12.807	11.835	14.639	14.741	12.771		228.571	15.008	14.6	13.028	8.366	12.86	12.449	12.048
230.476	23.078	15.612	16.129	10.079	29.905	13.922	10.82	14.149	12.451	10.589	25.393	15.927	11.063	15.186	15.568	14.393	15.545	13.126	18.323	14.299	21.605	10.17	16.09	13.148	19.36	10.959	19.508	13.16	12.196	40.821	28.5	24.748	20.218	18.106	11.733	12.745	11.667	14.404	15	11.978		230.476	14.564	14.443	13.226	8.482	12.047	12.583	12.053
232.381	22.784	15.909	15.207	9.755	28.284	13.879	11.123	13.142	12.413	9.74	24.506	15.365	11.252	14.848	15.449	15.173	14.084	12.174	15.707	13.294	21.46	10.222	15.351	14.804	19.434	11.893	19.818	13.625	11.621	42.304	26.141	24.657	20.406	17.55	11.363	12.11	11.215	14.795	14.915	12.101		232.381	15.447	15.221	13.88	8.375	11.611	12.862	12.28
234.286	21.931	15.242	16.405	9.735	26.507	14.19	10.701	13.929	12.671	10.12	22.423	14.868	11.946	12.703	15.934	17.428	13.99	12.192	14.485	13.355	22.306	10.089	15.126	13.461	19.606	12.38	19.936	13.085	11.749	39.464	26.602	24.189	20.255	18.406	12.052	11.986	11.763	15.229	14.448	12.503		234.286	16.377	16.289	14.014	8.062	11.782	12.988	12.36
236.19	21.237	15.877	16.267	9.483	23.493	14.312	10.877	13.759	12.498	11.516	22.351	14.79	11.964	13.214	16.037	16.873	14.015	12.713	13.976	13.808	22.48	10.319	15.847	12.409	20.286	11.562	19.519	13.365	12.732	38.554	26.5	23.524	20.258	18.65	12.008	12.221	12.728	14.904	15.234	12.117		236.19	15.284	16.114	13.29	8.545	12.829	13.142	12.439
238.095	21.03	15.47	15.81	8.841	21.162	13.996	11.033	13.418	12.202	11.276	20.863	15.196	11.604	14.317	15.967	14.798	14.054	12.527	12.539	13.636	22.395	9.889	15.486	12.713	21.309	11.455	20.31	14.77	12.638	39.214	26.469	22.874	20.594	18.456	11.789	12.2	11.857	14.886	15.781	12.508		238.095	14.412	14.771	12.945	9.446	12.788	12.081	12.64
240	21.724	15.603	15.75	9.079	19.014	13.442	11.19	13.319	12.798	10.094	20.75	15.858	11.468	14.29	15.584	14.11	13.337	12.377	12.162	13.818	21.859	9.844	16.315	11.917	21.331	11.455	20.588	15.185	12.374	38.393	27.812	23.49	20.305	18.444	12.048	12.297	11.487	15.066	14.925	13.173		240	14.689	14.436	13.7	9.179	12.788	11.47	12.434
241.905	21.741	17.041	16.767	9.775	18.581	13.346	11.602	13.234	12.915	10.344	21.768	16.667	11.333	15.876	15.914	14.341	13.119	12.287	12.701	13.818	21.556	11.119	15.658	11.252	21.28	11.331	20.663	15.865	12.8	36.75	27.227	24.315	20.047	17.9	11.873	12.283	12.014	14.777	14.234	12.564		241.905	15.475	14.689	13.788	9.366	12.969	11.765	11.757
243.81	20.22	17.037	17.517	10.026	17.899	13.212	11.062	13.085	12.601	11.307	21.274	16.913	11.676	16.414	15.984	14.168	13.366	11.814	13.03	13.682	22.056	10.496	14.36	10.861	20.783	11.628	20.219	17.125	12.613	34.286	26.609	22.853	20.356	17.544	11.956	11.786	11.437	14.5	14.771	12.33		243.81	15.607	15.396	14.24	8.866	12.487	12.603	11.206
245.714	19.138	16.347	16.422	10.013	16.818	13.078	11.009	13.596	13.085	11.203	20.464	16.493	12.712	13.959	14.724	12.821	13.252	12.359	12.808	13.888	22.149	10.081	16.613	10.643	20.417	11.099	19.235	17.23	12.374	34.696	26.906	23.371	19.477	16.431	11.693	11.993	11.072	14.542	14.393	12.179		245.714	15.626	14.964	14.387	8.777	12.741	13.097	11.608
247.619	18.116	15.137	15.638	9.98	16.122	13.056	11.351	13.028	12.92	10.172	17.911	14.968	12.09	12.966	14.428	12.272	12.401	11.928	11.814	13.318	21.351	10.052	16.126	9.857	19.36	11.149	19.487	15.8	11.864	37.643	27.016	23.916	18.121	15.331	11.191	12.186	11.62	14.639	13.826	11.223		247.619	15.51	14.536	14.065	9.607	12.264	13.368	12.487
249.524	18.246	14.63	16.095	9.748	15.932	13.216	11.175	12.262	11.69	10.125	16.196	14.479	11.261	13.021	15.132	13.064	11.683	11.695	11.257	13.037	20.871	10.37	13.991	9.826	19.629	11.57	19.535	15.025	11.519	37.214	28.539	23.105	18.379	15.087	11.191	12.034	11.849	14.151	13.96	11.335		249.524	15.44	15.421	13.931	9.277	11.389	13.271	12.661
251.429	18.284	14.699	15.862	9.358	17.682	13.61	11.493	13.638	11.587	10.255	17.173	15.575	12.369	13.855	15.222	14.884	12.332	12.407	12.311	13.341	21.306	11.133	15.252	9.97	20.457	10.496	19.123	15.56	11.366	35.982	28.125	23.867	19.181	14.456	11.088	11.959	11.789	13.53	13.861	12.184		251.429	15.054	15.871	14.088	9.259	10.933	12.709	12.323
253.333	16.953	14.521	15.81	8.801	18.439	13.472	10.768	13.39	12.352	10.115	16.452	15.763	12.793	13.483	15.152	16.341	13.173	11.545	16.377	13.682	21.097	10.163	15.441	9.652	19.406	10.62	18.914	15.46	11.03	37.357	25.297	24.098	18.916	14.119	10.928	12.041	11.538	13.416	14.199	11.721		253.333	15.451	15.879	14.046	9.321	10.466	13.227	12.037
255.238	17.254	14.863	15.759	8.464	17.297	13.658	10	12.759	12.136	10.859	15.185	15.05	13.045	13.407	14.881	15.237	12.832	11.311	17.76	13.523	21.605	10.022	14.937	9.526	19.554	10.959	19.519	15.64	11.366	38.196	24.984	23.378	18.238	14.831	11.785	12.103	11.165	14.133	15.005	11.369		255.238	16.023	15.557	13.585	9.366	9.793	13.13	13.063
257.143	16.974	14.986	15.664	8.43	16.223	13.823	11.014	11.787	12.108	10.74	14.649	14.498	12.441	13.724	14.449	13.376	12.777	11.731	15.527	13.846	22.27	10.304	15.396	9.591	20.989	10.983	20.369	17.315	11.311	37.607	26.727	23.867	18.973	15.056	12.474	11.772	11.244	14.994	15.189	11.955		257.143	16.035	15.754	13.659	9.321	10.249	12.393	13.354
259.048	16.935	15.16	15.241	8.689	16.081	13.13	11.754	11.574	12.488	11.13	17.565	14.84	11.91	12.979	14.811	13.642	15.97	10.874	16.425	13.696	21.569	9.741	15.541	10.796	19.897	10.95	20.294	18.68	11.157	35.536	27.289	23.692	20.013	14.325	12	11.524	11.007	14.494	14.945	12.369		259.048	14.938	15.729	13.848	8.509	10.803	12.83	12.794
260.952	19.224	14.995	15.353	9.179	15.432	13.723	12.147	11.681	12.662	11.568	21.774	15.575	11.613	14.876	15.63	13.85	17.644	11.323	17.455	13.495	21.435	10	14.252	12.448	19.503	11.074	20.663	18.065	11.498	36.571	26.164	23.42	20.372	14.175	11.944	12.076	11.022	14.922	15.194	12.352		260.952	13.938	15.204	13.839	8.143	10.684	13.255	13.381
262.857	22.496	13.927	16.207	8.987	15.243	14.091	12.128	10.106	12.136	10.818	21.506	15.895	11.027	14.648	15.066	13.052	16.312	11.892	16.844	14.131	21.919	10.6	14.261	14.096	20.971	11.074	19.337	18.04	11.728	35.375	26.172	23.105	20.581	13.719	11.789	11.876	11.387	14.524	14.94	12.145		262.857	14.665	14.264	14.092	8.009	10.886	12.356	13.19
264.762	21.862	13.288	16.198	8.053	16.236	13.489	11.033	9.66	11.93	10.302	19.435	15.352	11.45	14.752	14.16	11.948	16.045	11.467	15.958	14.061	22.077	9.815	14.685	14.461	20.166	11.008	17.904	17.945	11.63	35.893	26.82	23.063	19.54	13.569	11.665	10.966	11.297	13.904	14.184	12.128		264.762	14.911	14.786	14.636	9.161	10.865	12.385	12.968
266.667	19.935	13.74	15.293	7.934	16.108	13.615	11.014	10.376	12.221	9.943	19.137	15.05	11.36	15.097	14.811	11.249	15.723	11.144	14.251	13.78	21.738	9.933	14.09	14.687	20.074	10.884	18.92	16.075	10.787	40.161	25.797	23.923	18.319	13.119	11.904	11.786	10.624	14.627	13.642	12.709		266.667	14.86	16.196	14.415	9.518	10.979	12.267	12.37
268.571	20.315	15.046	14.716	8.185	15.203	13.706	11.152	9.986	12.014	9.859	18.071	14.909	11.234	12.572	15.202	11.249	13.99	11.228	15.144	12.822	20.98	10.956	14.324	13.552	20.589	10.612	19.722	14.39	11.162	37.732	23.922	24.322	18.433	12.5	11.327	12.159	10.444	13.873	14.537	12.335		268.571	14.984	15.264	13.641	8.875	11.218	12.053	12.005
270.476	20.435	16.689	15.31	8.351	14.601	12.853	10.981	10.014	12.366	10.141	16.667	14.858	11.883	12.855	15.189	11.497	13.55	11.072	16.629	13.168	20.649	11	14.568	11.574	19.309	10.769	19.743	14.995	11.536	36.821	24.57	23.986	19.366	13.006	10.837	10.966	11.007	14.566	15.144	11.453		270.476	14.72	13.832	14.23	8.732	10.653	13.101	12.212
272.381	19.621	16.215	15.009	8.417	15.824	13.035	10.905	10.05	12.38	10.161	15.869	14.817	11.468	13.228	14.774	12.116	13.822	10.581	14.641	13.28	21.02	10.659	14.559	10.23	18.943	9.942	18.93	15.85	11.272	41.768	25.305	23.678	19.302	12.7	11.116	10.71	11.108	15.151	14.652	11.039		272.381	15.261	13.471	14.286	8.393	10.052	12.304	11.688
274.286	17.866	15.374	14.957	7.629	17.791	13.312	11.46	9.397	12.239	9.974	15.083	14.447	12.306	12.8	14.095	13.173	13.45	11.084	13.425	13.089	21.585	10.148	13.811	9.578	19.446	9.752	19.027	15.845	11.8	42.393	24.961	23.14	18.322	12.756	11.219	11.248	11.086	14.307	14.299	10.927		274.286	15.809	14.825	13.502	8.616	10.368	11.947	12.238
276.19	17.401	15.58	15.534	7.861	17.824	13.026	11.384	9.957	11.934	10.193	14.798	15.667	13.045	13.6	14.296	15.046	12.847	12.036	11.665	14.023	21.903	10.207	13.91	9.891	19.891	10.843	19.578	15.25	11.63	39.286	24.758	23.182	18.215	13.081	11.231	11.517	10.742	14.09	14.249	11.285		276.19	15.482	15.882	13.134	8.607	11.358	12.907	12.704
278.095	17.539	15.653	16.397	8.47	16.75	13.468	10.768	10.915	11.732	10.375	13.821	16.498	11.604	14.269	14.58	15.734	12.757	12.461	10.647	13.752	22.766	9.956	15.739	9.53	19.709	11.744	19.578	13.7	11.132	38.839	25.281	23.413	18.148	12.194	11.243	12.303	10.491	13.904	14.811	11.715		278.095	14.938	14.868	13.281	8.277	11.57	12.433	12.376
280	17.168	15.726	16.388	8.603	16.459	13.584	11.227	10.83	12.183	9.812	13.542	15.731	11.054	14.717	14.07	15.445	14.381	12.521	11.611	13.201	22.29	10.785	15.252	9.326	18.88	11.207	19.39	12.775	11.587	37.196	25.445	23.657	18.154	13.056	11.191	12.331	10.523	13.627	14.423	11.777		280	14.619	14.771	13.014	8.938	10.933	12.462	12.143
281.905	17.496	15.091	15.155	8.589	16.358	12.636	10.863	10.397	12.324	9.776	14.25	15.817	11.874	14.669	13.926	15.815	14.411	12.635	12.204	13.154	20.911	10.733	14.297	8.974	19.846	11.24	19.011	14.09	11.332	36.518	25.727	23.245	18.131	14.875	11.657	11.448	10.401	13.283	14.199	11.24		281.905	14.167	15.268	13.677	9.33	11.135	12.036	12.508
283.81	18.211	14.922	15.379	8.437	17.061	11.883	10.152	10.39	12.714	10.823	15.226	15.735	11.946	13.759	14.605	16.035	14.564	11.868	11.898	13.318	21.012	9.711	15.162	8.596	20.606	11.562	18.861	14.25	11.094	37.089	26.938	22.741	18.104	16.094	12.223	11.083	11.068	13.964	14.403	11.492		283.81	14.638	15.418	14.065	9.036	12.679	11.923	12.106
285.714	18.504	15.324	16.793	8.768	17.682	13.091	10.673	11.801	12.484	11.557	17.131	15.484	12.171	14.662	15.086	15.682	16.406	11.928	11.677	13.636	21.327	10.607	15.279	8.674	19.811	11.636	19.385	13.285	11.477	36.929	27.227	23.692	19.161	15.888	11.92	11.228	11.71	13.717	13.677	11.307		285.714	15.362	15.282	13.834	8.616	12.803	12.874	11.556
287.619	17.547	15.283	17.276	9.172	16.932	13.706	11.299	12.915	12.146	10.87	18.238	15.571	12.216	15.497	14.584	15.364	16.495	11.892	12.455	13.444	21.399	10.378	14.955	9.322	20.057	10.901	19.283	13.755	11.451	37.464	27.344	23.608	19.43	14.887	11.482	11.655	11.703	13.542	13.975	11.263		287.619	14.716	14.921	13.35	8.455	12.161	12.798	12.132
289.524	21.28	15.758	15.828	9.205	16.514	13.29	10.393	12.957	11.643	10.188	20	15.018	11.685	14.517	14.288	15.861	16.386	11.641	12.257	13.888	21.343	10.459	14.315	10.426	19.869	10.587	19.193	13.905	11.06	35.929	26.203	23.601	18.55	14.169	11.673	11.738	11.154	14.012	14.493	11.665		289.524	14.767	14.7	13.249	9.071	12.026	12.271	12.603
291.429	24.272	16.406	14.095	8.695	16.534	13.225	10.336	11.865	11.531	10.411	21.732	13.895	11.991	14.434	13.93	16.017	16.639	11.988	11.275	14.173	21.181	10.793	13.559	10.687	19.297	11.256	19.203	14.65	11.323	36.304	25.289	24.14	18.574	14.975	12.482	11.69	10.455	13.524	14.129	11.117		291.429	14.93	14.314	13.931	8.973	11.544	11.761	11.968
293.333	20.784	17.068	14.293	8.483	15.912	13.238	11.498	11.936	11.93	10.635	21.113	14.388	12.135	14.497	13.695	15.908	15.827	11.305	14.713	13.701	21.282	9.874	13.991	12.822	19.6	10.876	19.332	15.25	12.345	40.357	25.406	22.427	18.574	15.975	12.637	11.91	10.814	13.994	14.025	11.743		293.333	14.767	14.736	13.613	8.446	12.073	11.854	11.915
295.238	20.224	16.822	15.94	8.179	15.405	13.835	11.223	12.624	11.376	10.625	19.506	15.11	12.081	13.021	13.226	14.96	14.243	11.653	16.389	13.444	22.048	9.681	15.55	14.57	19.634	11.008	19.401	15.35	12.064	39.339	25.773	21.853	18.319	17.925	12.124	11.807	11.452	14.096	14.294	12.391		295.238	15.101	15.589	13.696	8.357	12.86	11.98	12.598
297.143	21.177	15.699	17.112	8.563	16.318	13.143	10.327	11.298	11.911	10.281	17.899	15.443	12.126	12.579	12.753	14.168	13.703	12.407	14.796	13.126	22.778	10.03	15.541	13.57	19.931	11.149	19.267	15.28	11.017	38.929	26.492	23.797	18.255	19.419	12.351	10.986	11.014	13.584	14.398	10.782		297.143	15.576	15.661	13.871	8.152	12.161	11.996	12.201
299.048	20.496	15.123	17.491	8.649	15.858	12.416	9.848	10.27	11.826	10.641	17.226	14.621	11.135	14.145	14.165	13.908	13.817	11.91	15.994	13.542	22.028	10.044	15.234	13.5	19.754	10.769	20.273	14.75	11.021	38.768	25.828	23.287	17.795	18.869	12.131	10.745	10.068	13.428	14.617	10.57		299.048	15.265	14.996	14.065	8.357	11.005	11.583	11.852
300.952	19.03	16.356	16.897	7.98	14.446	12.563	10.047	10.348	11.592	10.776	16.405	13.785	11.757	14	14.679	14.121	13.208	11.581	15.557	13.551	20.774	10.007	14.91	12.796	18.829	10.14	20.909	14.165	11.409	37.143	25.898	21.748	17.966	19.675	12.175	11.869	10.358	13.145	15.05	12.006		300.952	14.84	14.946	14.023	8.143	10.363	11.769	11.635
302.857	17.358	16.735	15.509	8.073	12.845	12.242	10.948	10.468	12.235	10.13	15.125	15.064	12.712	14	14.494	14.491	13.114	11.629	14.479	13.346	20.597	10.185	13.793	11.248	19.703	10.091	20.733	13.415	10.753	36.625	25.859	22.406	18.725	20.188	11.932	12.234	10.323	13.211	14.98	11.994		302.857	15.311	14.914	13.631	8.045	10.088	12.421	11.148
304.762	17.172	15.594	15.147	8.159	11.372	12.9	11.431	9.745	11.427	10.089	14.304	15.502	11.649	13.91	15.041	16.058	12.703	11.251	16.066	13.5	21.435	9.904	14.234	10.657	20.811	10.488	22.294	14.515	10.745	36.071	24.969	23.161	18.856	20.263	11.968	11.938	10.362	14.09	14.463	11.888		304.762	15.307	14.604	13.35	8.134	10.451	12.036	11.577
306.667	16.892	17.228	15.078	8.272	12.007	12.913	11.431	10.035	11.347	10.646	14.345	14.763	11.955	14.034	14.687	17.116	12.713	10.844	16.455	13.706	22.387	10.104	15.982	10.648	20.554	10.322	24.38	14.96	11.481	37.929	26.492	24.273	18.44	20.225	11.809	11.924	11.251	14.536	14.214	11.145		306.667	15.058	13.686	12.65	7.884	10.332	11.976	11.804
308.571	16.405	17.562	15.75	8.338	12.709	12.242	10.82	10.333	11.671	10.37	14.792	14.247	13.027	14.372	13.909	15.618	13.391	11.491	14.557	14.154	22.621	10.607	16.55	9.909	19.88	10.802	23.941	14.8	11.072	38.696	25.852	23.762	18.121	19.319	11.781	12.11	10.817	14.205	13.94	11.436		308.571	14.576	13.604	12.272	8.482	10.539	11.676	12.407
310.476	16.871	15.37	16.819	7.821	12.155	12.481	10.64	10.128	11.751	11.062	14.655	14.301	13.144	13.31	13.436	14.96	12.713	12.132	15.048	14.252	22.069	10.719	16.441	9.361	19.326	11.57	23.299	15.61	11.523	40.089	25.242	22.343	18.433	18.987	12.175	12.062	10.47	14.325	13.851	11.838		310.476	14.661	14.129	13.332	8.705	10.793	11.53	12.794
312.381	17.401	16.137	17.095	7.901	12.784	13.069	11.825	10.915	12.967	12.276	15.101	14.274	13.072	12.717	13.753	14.942	13.03	11.838	15.431	13.925	22.028	11.4	15.667	9.548	19.48	11.207	24.636	14.395	12.366	40.036	26.281	22.308	17.94	19.856	11.829	11.51	11.176	14.639	14.294	11.43		312.381	15.245	14.464	13.995	8.518	10.264	12.202	11.302
314.286	18.078	17.658	16.784	8.649	13.5	13.13	12.45	12.624	12.54	12.099	15.077	15.105	12.541	13.393	14.609	14.965	13.743	12.186	14.24	13.808	23.093	11.296	15.054	9.557	20.171	10.802	24.872	14.035	12.323	40.143	26.82	23.238	17.936	19.85	11.769	11.766	11.538	14.765	14.975	12.106		314.286	14.957	15.025	13.903	8.741	10.482	12.259	11.243
316.19	18.155	16.795	16.707	9	13.122	13.446	11.957	13.553	11.54	11.12	14.512	15.717	11.441	14.607	14.704	14.353	13.495	12.707	14.287	14.117	23.766	10.526	16.252	9.296	20	11.488	24.353	14.235	12.209	39.857	27.656	23.573	17.789	18.606	11.606	11.207	10.724	14.62	14.672	11.626		316.19	14.848	14.514	13.581	9.259	10.575	12.291	11.937
318.095	21.474	15.763	16.216	9.166	13.534	13.823	11.284	13.645	11.69	10.052	19.167	15.717	11.207	14.434	14.823	15.116	13.198	12.036	15.731	13.388	22.524	10.222	16.081	8.726	20.269	11.579	25.134	14.265	12.128	37.5	26.266	22.406	17.916	18.181	11.749	11.379	10.491	14.349	14.09	11.682		318.095	14.327	14.325	13.129	9.366	10.446	12.178	11.926
320	22.767	15.269	15.466	9.344	14.946	13.823	10.972	12.936	11.948	10.016	24.101	15.205	11.459	13.821	15.321	17.202	13.134	11.635	16.389	13.28	21.44	9.933	14.613	8.939	20.703	10.62	26.487	14.69	12.26	39.179	25.914	23.469	18.688	19.169	11.805	12.386	11.079	14.373	14.164	12.011		320	13.852	14.461	12.816	8.848	10.601	11.838	12.021
321.905	20.625	15.356	16.345	9.04	16.02	14.247	11.427	12.872	11.981	10.766	21.94	14.493	11.946	14.407	14.885	16.942	13.5	11.737	15.689	14.098	21.964	9.415	16.712	8.804	20.971	10.24	27.834	14.54	11.851	39.286	26.602	23.699	18.403	18.269	11.375	11.71	11.125	14.783	14.214	11.547		321.905	13.914	14.321	12.903	8.312	9.969	12.51	12.429
323.81	21.134	15.169	16.086	8.106	17.014	14.087	11.498	12.525	12.056	10.906	19.107	14.119	11.595	13.634	13.844	14.827	13.272	11.569	14.533	13.467	22.302	10.059	16.486	8.987	21.029	9.934	28.979	14.4	11.562	37.625	25.734	22.888	18	17.119	11.39	11.531	11.362	15.187	14.03	11.542		323.81	14.175	13.811	13.47	8.589	9.984	13.02	12.513
325.714	19.948	14.648	16.172	7.96	16.716	13.589	11.777	11.851	12.075	10.13	17.667	14.21	11.171	12.855	14.222	13.306	13.198	11.216	14.15	12.888	21.935	10.704	14.613	9.73	20.886	10.347	28.668	14.135	11.426	37.607	25.727	23.664	17.708	17.85	12.032	11.634	11.14	14.518	13.731	11.274		325.714	14.84	13.896	13.968	8.732	9.933	12.385	12.328
327.619	18.565	15.795	17.595	7.848	15.764	13.784	12.303	12.234	12.099	10.01	17.155	14.046	11.739	12.986	15.021	13.954	13.723	11.545	14.826	13.808	21.593	10.6	18.18	9.835	20.777	11.686	28.182	14.49	12.387	34.339	26.109	23.881	18.426	18.319	12.542	11.186	11.333	14.482	13.955	11.425		327.619	15.502	13.686	14.092	8.679	10.124	11.903	12.185
329.524	18.004	16.74	16.466	7.185	16.297	14.307	12.133	12.064	11.915	11.297	18.03	14.155	12.036	14.248	14.638	14.116	13.356	11.856	15	14.285	22.093	10.681	18.829	10.465	20.617	12	29.176	14.87	12.566	33.679	26.469	23.783	18.97	17.975	12.534	11.717	11.398	14.904	14.483	12.268		329.524	15.008	14.036	13.069	8.714	10.694	11.891	12.111
331.429	17.155	15.79	15.621	7.636	16.169	14.273	11.763	11.511	11.554	11.865	18.857	14.616	12.468	15.91	14.761	12.925	12.619	11.659	14.533	13.5	21.778	9.859	17.09	12.357	20.629	10.669	30.444	14.03	11.711	35.893	27.141	23.42	18.174	16.612	12.279	11.883	10.581	14.518	14.697	11.642		331.429	15.035	15.389	12.507	8.839	10.404	12.158	12.302
333.333	17.116	15.452	16.483	8.159	15.797	13.762	11.37	11.851	11.831	11.214	19.125	14.333	12.514	15.4	14.971	12.168	12.772	12.575	14.066	13.238	22.286	9.807	16.586	13.848	19.897	10.661	35.267	13.305	11.749	35.375	26.539	22.608	18.097	16.487	11.729	11.952	10.746	14.096	14.488	11.089		333.333	15.58	15.393	12.613	8.848	10.161	12.186	11.942
335.238	17.043	14.612	16.819	8.132	16.405	12.861	11.095	12.638	11.948	10.995	19.113	14.425	11.802	14.228	14.152	12.428	13.55	12.659	12.749	13.402	22.431	9.911	14.387	13.443	19.749	11.223	41.556	13.695	12.026	36.071	25.781	23.832	17.926	16.288	11.769	11.655	11.265	13.735	14.617	11		335.238	14.977	14.961	12.917	8.116	10.021	12.364	11.577
337.143	16.664	13.242	16.905	8.192	16.27	12.602	11.545	12.035	11.737	10.255	19.274	14.018	11.333	14.09	14.774	14.601	14.619	12.539	11.515	12.939	20.327	9.185	13.45	12.9	19.954	10.711	46.214	14.465	12.519	36.893	25.734	24.797	17.329	15.619	12.131	11.055	11.229	14.554	14.388	11.196		337.143	14.42	15.082	13.548	8.089	10.933	12.567	11.799
339.048	17.349	13.087	16.362	7.722	13.824	12.823	11.754	11.631	11.911	9.651	19.179	13.589	11.027	13.2	14.198	16.908	15.431	12.198	11.15	12.986	20.569	10.43	13.613	12.23	19.88	10.388	51.984	13.825	11.587	36.893	25.422	23.552	18.403	16.094	12.343	11.331	11.452	15.048	13.577	10.581		339.048	14.673	15.796	14.147	9.429	11.363	12.138	12.884
340.952	17.504	14.562	15.388	8.464	12.095	13.312	11.597	11.028	12.399	10.188	20.518	14.219	11.216	12.945	13.436	16.052	14.5	11.838	11.263	13.22	21.52	11.378	13.811	10.909	19.32	10.174	57.005	13.81	11.098	38.143	24.844	22.448	18.872	16.431	11.968	11.393	11.151	14.078	13.095	10.045		340.952	14.786	15.421	14.415	9.152	11.145	12.215	12.894
342.857	17	15.466	16.25	8.795	11.48	13.255	11.389	11.567	11.732	10.198	20.601	14.539	11.559	14.055	14.708	14.202	13.03	11.509	11.443	13.014	20.411	10.97	15.027	10.165	17.914	9.992	59.176	14.37	11.94	36.321	25	22.734	18.664	17.013	11.024	10.959	11.14	13.602	13.746	10.43		342.857	14.518	14.429	13.853	8.545	11.725	12.401	12.524
344.762	20.099	14.635	16.405	8.404	12.047	13.216	10.986	13.156	11.906	10.255	19.393	15.174	12.18	15.028	14.222	13.382	13.252	11.192	11.473	12.93	20.802	11.148	15.748	9.709	18.434	9.711	58.69	13.045	11.928	33.518	26.227	22.678	18.456	17.188	10.765	11.255	10.853	14.283	14.532	10.503		344.762	15.436	14.218	13.253	8.848	12.078	12.692	12.259
346.667	22.241	15.438	15.086	9.623	13.284	12.874	11.322	12.56	12.343	10.349	19.554	15.753	11.964	15.517	13.267	12.572	13.49	10.545	11.389	13.121	22.036	11.326	15.649	9.252	19.206	10.488	53.727	12.035	11.353	36.339	26.461	22.65	17.419	16.944	11.797	12.131	9.907	14.898	14.159	11.307		346.667	15.704	14.3	13.166	8.08	10.99	12.668	11.254
348.571	21.004	16.995	15.422	9.51	13.074	12.433	10.929	10.759	11.939	9.932	18.857	15.594	11.631	14.214	14.749	12.399	12.653	11.156	13.132	13.103	22.125	10.941	15.288	9.083	18.697	10.909	45.246	11.11	11.047	38.589	26.719	23.392	17.185	16.575	12.112	11.793	9.957	14.825	13.284	11.492		348.571	15.37	15.039	13.249	7.67	11.523	12.563	12.079
350.476	21.733	16.534	16.534	8.053	12.655	12.861	10.531	10.383	11.728	11.177	16.387	15.511	11.622	12.938	15.609	12.584	12.97	11.647	15.844	13.318	22.198	10.089	14.982	9.43	19.771	10.777	36.497	11.64	11.081	37.375	26.641	23.958	17.634	16.525	12.247	11.021	10.093	15.169	13.179	11.872		350.476	15.035	15.382	13.018	8.223	12.254	12.773	13.243
352.381	21.138	14.205	15.905	8.53	12.48	13.238	10.81	11.043	11.366	11.724	15.185	15.502	11.333	14.262	14.399	13.266	13.272	10.665	16.401	13.369	21.319	9.837	15.162	9.061	19.029	10.636	28.545	12.375	11.519	37.786	25.844	23.503	17.215	15.269	12.41	10.662	9.939	14.428	13.905	11.279		352.381	14.537	14.421	13.442	8.259	11.466	12.004	11.968
354.286	18.858	13.749	15.578	8.45	12.48	12.619	10.64	11.532	11.803	10.854	14.589	14.922	11.937	14.545	13.877	15.497	14.856	11.359	16.186	13.037	20.754	9.556	15.694	8.687	18.846	9.678	23.513	12.67	11.366	36.643	25.031	22.538	17.151	14.762	11.873	10.324	10.054	14.325	14.507	10.486		354.286	14.7	13.843	13.562	8.438	11.601	12.194	10.529
356.19	18.151	14.26	15.974	7.675	13.757	12.446	10.427	12.27	11.953	10.974	13.185	14.242	11.955	13.724	13.765	17.237	15.307	11.647	16.341	13.397	21.149	10.141	15.838	9.409	20.08	10.347	22.037	12.585	11.191	35.946	24.758	22.503	17.725	15.281	11.873	11.097	10.699	15.151	14.587	11.168		356.19	14.288	13.896	12.825	8.929	11.29	12.968	11.402
358.095	17.297	13.808	15.112	7.662	15.095	12.727	10.156	11.652	10.991	10.667	12.458	14.096	11.586	13.441	14.399	14.694	14.653	10.784	16.156	13.379	20.956	10.022	15.486	10.113	19.617	11.322	21.171	12.86	11.468	37.518	25	22.566	17.52	14.4	12.239	11.91	11.305	13.946	14.254	11.721		358.095	14.969	14.1	12.94	8.795	10.896	12.267	12.503
360	16.569	14.731	15.172	8.285	15.858	12.567	10.758	11.333	11.005	10.271	12.268	14.721	11.009	13.538	14.037	12.006	15.639	11.096	16.263	12.706	21.024	9.607	14.369	9.652	19.486	11.661	19.77	13.53	11.506	36.232	24.992	22.86	17.265	14.4	12.733	11.993	10.839	13.729	13.985	11.782		360	15.311	14.229	14.023	8.741	11.503	11.486	12.365
361.905	16.457	15.826	15.371	8.391	16.703	12.649	11.498	11.496	11.653	9.802	11.696	14.521	10.73	14.234	12.881	11.723	15.158	11.551	16.329	12.766	21.327	9.963	14.252	9.283	19.417	11.479	18.588	14.035	11.438	36.232	24.852	22.608	17.651	13.881	13.151	11.607	10.832	14.036	13.448	11.235		361.905	15.323	13.721	14.576	8.884	11.44	11.688	12.069
363.81	15.703	15.352	15.422	7.96	16.432	12.407	10.943	11.532	11.671	9.328	12.089	13.566	10.297	14.662	13.276	11.312	14.114	10.838	15.599	12.71	21.278	9.852	15.351	9.361	18.863	10.496	18.85	14.235	11.668	34.821	24.688	22.524	18.05	12.712	13.538	11.007	11.154	14.464	13.602	10.877		363.81	15.319	13.539	14.12	9.536	11.326	12.506	12.73
365.714	15.642	15.913	14.991	8.497	14.804	12.684	10.768	11.206	11.239	9.354	13.821	14.215	10.586	14.483	13.827	11.896	13.767	10.892	14.749	12.654	21.286	9.644	14.694	9.165	19.183	9.893	18.979	13.405	11.86	34.946	25.773	24.063	17.456	12.438	12.753	10.352	10.685	14.627	13.851	10.425		365.714	14.241	14.304	14.083	9.92	11	12.709	12.725
367.619	20.56	15.795	15.267	8.185	14.622	12.844	11.071	10.518	11.005	9.87	14.101	15.301	11.613	13.552	14.222	12.179	15.381	11.216	16.096	12.986	21.359	9.6	13.847	10.152	19.531	10.273	19.155	13.5	11.928	35.821	25.57	24.182	16.886	14.225	11.777	10.607	10.513	13.5	13.368	11.447		367.619	13.825	14.536	13.779	8.866	10.197	12.04	11.968
369.524	22.483	14.753	15.793	7.444	15.764	12.649	11.147	10.83	11.873	10.031	13.357	14.717	10.955	13.179	13.453	10.983	15.45	12.03	15.922	13.687	20.685	10.274	13.982	12.809	19.611	10.736	19.198	13.39	11.847	34.536	24.07	22.993	16.859	16.156	12.351	11.641	10.735	13.048	13.816	11.709		369.524	14.179	14.989	13.949	8.607	9.948	11.895	11.503
371.429	20.185	15.32	14.879	7.795	15.865	12.84	11.014	10.447	11.92	9.76	13.506	13.968	10.459	12.897	13.218	10.59	13.411	12.174	14.647	13.724	21.141	10.985	13.919	14.683	20.023	10.529	18.845	13.255	12.86	36.589	24.102	22.559	17.097	16.556	13.418	11.903	11.48	14.223	14.418	11.162		371.429	14.751	15.032	14.604	8.875	9.358	12.085	11.698
373.333	21.009	15.603	14.776	8.649	16.095	13.416	11.469	9.589	11.808	10.193	17.238	14.721	11.36	12.6	15.173	12.15	12.723	11.91	14.928	13.215	21.819	10.785	12.91	13.052	19.52	10.521	18.128	13.78	15.715	37.018	25.156	22.161	17.98	16.431	13.932	11.862	11.892	15.217	14.388	11.587		373.333	14.623	13.732	14.442	8.259	8.694	11.939	12.312
375.238	20.845	15.361	15.216	8.682	16.291	13.277	11.882	10.021	12.315	9.87	22.601	15.434	11.937	14.034	15.79	13.549	14.045	11.749	15.707	13.023	21.173	10.585	12.784	11.552	18.914	10.545	17.749	13.025	19.047	37.161	25.406	22.937	17.711	15.962	14.438	11.248	11.315	14.325	13.881	10.961		375.238	14.086	14.186	13.659	7.973	9.218	11.826	12.212
377.143	19.078	15.329	16.181	8.291	15.791	12.537	11.46	10.27	11.507	9.573	22.827	15.461	11.505	14.903	15.041	16.763	14.49	11.934	15.509	13.341	21.004	9.978	13.766	12.474	18.983	10.488	18.679	12.18	22.077	35.321	24.805	23.175	16.453	14.738	14.016	10.634	10.792	13.928	13.393	10.626		377.143	14.463	15.132	13.7	8.679	9.964	12.591	12.36
379.048	18.022	15.21	16.034	7.51	16.054	12.563	11.773	9.716	11.92	10.927	20.887	15.539	11.505	14.241	13.893	18.815	13.505	11.737	13.994	13.304	21	9.874	14.405	12.557	20.057	10.413	19.706	12.47	23.362	34.143	24.609	23.462	16.631	14.5	13.506	10.834	10.939	14.066	14.403	11.084		379.048	14.946	15.129	13.779	8.723	10.368	12.87	12.762
380.952	17.052	16.137	15.31	7.377	15.899	13.134	12.052	10.206	12.38	11.901	19.762	15.58	11.568	13.255	13.765	16.156	13.955	11.096	13.88	13.224	21.21	10.244	15.009	12.239	20.314	10.785	19.775	12.88	21.251	36.018	24.664	23.629	17.383	15.544	13.817	11.662	11.728	13.831	14.96	11.089		380.952	14.63	15.632	12.76	8.545	10.87	11.915	12.81
382.857	16.806	16.516	16.129	7.49	15.716	13.095	11.559	10.78	11.803	11.005	17.988	15.279	11.468	12.531	14.556	13.179	14.386	11.353	14.617	13.411	21.48	10.363	14.712	11.957	19.051	11.256	19.08	12.945	18.545	34.696	25.031	22.21	17.57	15.138	13.506	10.952	11.918	14.572	14.488	11.592		382.857	13.716	14.825	12.779	8.545	10.187	11.441	12.508
384.762	16.767	15.653	15.698	7.364	16.135	12.944	10.886	10.333	11.967	10.208	16.583	14.516	11.396	12.579	14.337	12.821	13.53	11.563	14.641	13.547	20.883	10.363	14.288	10.574	18.566	10.975	18.84	12.985	16.557	34.768	26.57	21.748	17.295	14.663	13.745	10.345	11.849	14.819	14.284	11.318		384.762	13.724	14.011	13.839	8.205	10.352	11.866	11.931
386.667	16.871	15.89	14.466	8.079	15.176	13.251	11.128	10.426	11.939	10.87	16.107	14.9	12.081	13.193	14.593	14.197	13.376	12.03	14.485	13.486	21.5	10.089	14.532	9.313	19.011	10.388	19.358	13.425	14.898	35.268	26.375	22.497	17.215	15.531	14.307	11.455	11.95	14.042	13.796	11.525		386.667	14.809	15.014	14.986	8.027	11.005	12.32	11.704
388.571	17.134	15.548	15.017	7.874	15.014	13.584	11.597	10.248	12.3	11.083	16.077	15.105	12.82	15.297	14.786	16.173	13.292	12.024	14.006	12.86	21.964	10.511	14.55	9.187	18.537	10.851	20.037	13.635	14.191	34.929	25.625	22.503	17.315	16.2	13.566	11.352	11.609	13.735	14.209	11.838		388.571	14.844	15.604	14.885	8.312	11.13	12.494	12.37
390.476	17.466	15.064	15.698	7.868	15.108	13.45	11.251	10.553	12.629	10.312	15.107	14.868	13.144	16.648	14.556	17.855	12.465	11.725	11.79	12.902	21.145	11.193	14.631	9.43	18.377	10.909	19.449	13.245	12.77	36.768	25.18	22.839	17.362	16.206	13.482	10.738	11.194	14.12	13.642	11.665		390.476	14.385	15	13.673	8.652	11.207	12.243	13.101
392.381	16.582	15.817	15.198	8.371	14.642	12.784	11.194	10.681	12.127	10.255	14.238	15.269	12.036	15.193	14.214	17.098	12.594	11.892	11.551	13.098	21.355	10.733	15.108	9.057	19.531	10.347	18.963	13.2	11.664	42.946	24.625	23.14	17.279	16.056	13.972	11.317	10.667	14.084	13.189	12.022		392.381	14.634	14.775	13.424	8.5	10.601	11.891	12.466
394.286	15.931	15.205	14.172	8.311	14.243	12.342	11.943	10.241	11.723	10.797	14.518	14.963	10.523	13.345	14.469	16.058	13.05	11.988	12.311	13.495	22.161	10.341	14.946	9.174	19.177	10.967	19.027	12.965	12.166	42.304	26.008	23.154	17.453	16.019	13.693	10.972	10.251	14.319	13.856	12.173		394.286	14.506	14.536	13.604	8.696	10.699	11.704	12.037
396.19	17.651	14.429	14.31	8.205	13.764	12.835	11.872	11.035	12.099	10.708	14.518	14.301	10.757	13.283	14.93	16.22	13.282	11.605	12.018	13.173	22.044	10.356	14.757	9.526	19.029	11.413	19.369	13.33	12.587	37.286	25.789	23.196	18.262	16.275	14.1	10.793	10.154	14.602	14.358	12.022		396.19	14.564	14.075	12.94	8.768	10.788	12.065	12.042
398.095	20.409	14.968	15.431	7.808	13.845	13.355	11.555	11.369	12.526	10.729	13.768	14.502	12.459	13.214	14.3	16.179	14.223	11.287	12.725	12.519	21.661	10.422	14.604	8.991	19.531	10.893	19.856	13.63	12.17	37.411	25.766	22.706	17.983	15.894	13.701	10.945	10.366	14.566	14.567	11.201		398.095	14.409	14.425	13.332	8.571	10.819	12.15	11.783
400	20.944	14.84	15.5	8.106	13.547	13.433	11.758	11.142	12.432	11.312	13.512	15.082	12.423	13.655	14.724	16.306	15.267	12.018	12.988	13.43	21.952	10.022	14.36	8.926	19.309	10.463	19.813	13.26	12.145	35.393	25.398	23.385	17.047	14.15	12.785	11.166	11.022	14.217	14.587	11.268		400	13.763	14.632	14.161	8.804	11.342	11.862	12.021
401.905	19.043	14.795	14.422	8.305	12.939	13.887	11.483	10.865	12.225	11.13	13.524	15.132	10.811	14.055	14.041	17.173	15.054	11.85	12.814	14.243	22.097	9.867	14.514	9.661	20.634	10.488	19.198	12.715	12.217	34.393	24.461	23.629	17.386	13.756	13.08	12.283	10.961	14.313	15.02	11.81		401.905	14.089	14.225	13.359	8.991	10.974	12.097	12.265
403.81	19.31	15.932	14.362	8.682	11.899	14.16	11.488	11.135	11.592	11.406	14.036	15.886	11.36	14.186	13.72	16.647	13.812	10.994	12.563	13.547	22.302	10.644	14.099	10.13	21.709	10.785	18.567	12.2	11.804	35.839	24.445	22.65	17.389	13.506	13.179	11.979	10.706	14.169	14.194	11.559		403.81	14.51	13.214	13.548	8.545	10.233	11.874	11.974
405.714	19.905	15.594	14.94	9.113	12.014	13.433	11.469	12.333	11.16	11.401	14.482	15.726	12.243	13.71	14.922	15.353	12.748	11.407	11.892	13.21	22.149	10.452	12.721	9.717	20.257	10.678	18.39	12.93	11.579	38.75	25.094	21.301	17.426	12.144	12.936	10.697	10.674	13.976	14.134	11.564		405.714	14.63	13.814	13.972	8.259	10.326	12.202	11.63
407.619	18.884	14.731	15.603	8.066	12.128	13.182	11.791	12.348	11.671	11.333	15.03	15.447	12.297	12.862	14.457	15.341	13.188	11.826	11.856	13.626	22.657	9.815	13.667	11.204	20.789	10.438	18.647	13.475	11.634	37.911	25.922	22.615	17.711	12.275	13.637	10.69	10.663	13.952	14.856	11.726		407.619	14.755	15.104	13.018	8.696	10.601	11.692	12.317
409.524	18.246	15.142	15.707	8.159	12.101	13.398	11.791	10.823	11.803	10.885	17.827	15.539	13.306	13.607	14.128	17.208	13.386	12.335	11.521	13.332	22.323	10.459	14.378	14.235	23.177	10.612	18.829	12.53	12.489	35.446	25.812	24.217	17.56	13.206	13.546	11.145	10.91	14.036	14.582	11.52		409.524	14.447	14.739	12.857	9.161	10.166	10.996	11.931
411.429	18.841	16.639	15.319	8.841	12.493	13.307	11.521	11.213	11.624	9.677	24.929	15.708	13.405	13.648	14.827	17.896	12.97	12.329	11.431	13.201	21.347	11.03	12.973	13.504	24.251	10.149	18.551	12.165	12.706	38.446	25.047	23.49	17.339	12.65	12.478	11.028	10.824	13.946	14.512	11.341		411.429	14.062	13.711	13.281	8.411	10.088	11.721	11.608
413.333	19.853	17.087	15.414	8.232	11.264	12.58	11.91	11.809	12.089	10.542	26.399	16.187	13.622	13.931	14.971	17.069	13.272	11.563	13.066	13.262	21	10.837	13.117	12.3	25.771	10.207	18.872	12.32	12.791	39.536	24.18	21.853	17.05	11.887	12.151	11.545	10.878	13.331	14.498	11.207		413.333	14.397	13.607	13.728	7.696	10.187	12.138	11.873
415.238	18.918	14.699	15.069	7.669	11.034	12.81	11.758	10.298	11.962	11.26	20.798	15.79	13.153	15.179	14.169	15.861	12.946	11.551	14.862	13.042	21.319	9.889	13.36	13.404	27.109	9.934	18.749	11.27	12.383	35.982	24.023	21.811	16.56	12.35	12.657	11.593	10.434	13.404	14.065	11.385		415.238	14.615	14.318	14.046	8.179	10.093	11.955	11.243
417.143	17.953	15.283	15.431	6.967	12.878	13.117	11.256	11.255	11.596	11.146	18.107	14.575	12.171	14.89	13.527	15.202	12.718	11.611	15.695	13.098	21.589	9.504	14.108	12.748	26.571	10.124	18.679	11.965	11.749	36.143	24.414	22.881	16.869	16.081	13.08	11.166	9.534	13.602	14.488	11.531		417.143	15.105	14.054	13.945	8.634	9.767	11.915	11.857
419.048	17.793	17.068	17.25	6.338	14.52	12.346	11.095	12.482	11.399	10.891	17.167	13.858	12.468	15.007	13.835	17.434	13.248	11.168	16.359	13.051	21.488	10.141	16.27	11.783	26.549	10.975	19.134	13.115	12.247	37.536	25.586	22.552	17.54	19.344	13.187	11.579	9.513	13.777	14.985	11.698		419.048	15.113	14.007	14.138	8.759	9.767	11.729	13.053
420.952	16.806	16.082	17.716	7.099	15.378	12.403	11.427	11.206	11.329	10.51	15.679	14.598	12.225	13.979	13.819	18.127	12.995	11.012	16.808	12.636	21.25	9.807	17.928	10.796	25.303	10.008	18.433	12.84	12.145	36.607	25.07	21.441	17.225	17.263	12.785	11.628	10.022	14.627	14.358	11.184		420.952	14.821	14.696	13.834	8.884	10.036	11.441	12.762
422.857	16.728	14.137	17.586	7.437	15.514	12.117	12	11.248	12.211	10.406	14.351	14.781	12.144	13.007	14.292	16.549	12.688	11.156	15.108	12.682	20.863	9.652	19.144	9.496	22.657	9.967	18.337	12.445	12.306	35.161	24.75	21.573	16.134	16.15	12.45	11.138	10.864	14.271	13.637	10.24		422.857	14.883	14.621	13.018	9.375	9.933	11.462	11.571
424.762	16.5	13.493	19.388	6.728	14.338	11.623	12.038	10.752	11.606	9.448	13.982	14.315	11.739	12.572	14.222	15.838	12.134	11.641	14.701	12.612	21.653	9.889	19.252	8.748	21.166	10.62	18.701	12.275	12.468	34.821	24.727	22.301	15.966	16.331	12.733	10.69	10.62	13.518	12.771	10.413		424.762	14.385	13.95	12.816	9.214	10.57	11.85	11.624
426.667	15.716	15.493	24.112	6.993	13.385	11.463	11.322	9.199	10.399	9.422	13.19	13.854	11.225	12.848	13.926	16.237	11.733	12.024	14.407	12.206	22.121	9.481	16.18	8.548	20.309	10.091	18.332	12.115	11.711	37.482	23.852	22.063	16.359	15.487	12.904	11.103	9.52	13.494	13.154	10.704		426.667	14.089	13.518	13.442	9.241	11.073	12.032	11.349
428.571	16.065	16.137	28.828	7.781	14.088	12.147	10.877	9.518	10.718	10.307	13.637	14.16	10.505	14.779	14.016	16.618	12.802	11.814	13.593	12.243	22.177	10.059	15.739	8.783	20.269	10.066	17.765	12.755	11.174	38.464	25.039	22.182	16.617	16.263	13.291	11.103	10.072	14.193	14.562	10.581		428.571	14.198	13.329	13.668	8.598	11.036	11.656	11.058
430.476	16.034	14.096	30.491	7.96	14.601	12.641	11.114	9.965	11.005	10.615	13.946	14.799	9.622	14.786	14.387	15.514	15.015	11.964	13.862	12.883	21.923	10.696	17.243	9.083	19.314	11.017	17.604	13.215	10.889	38.214	26.617	22.678	16.738	16.112	12.936	10.559	10.781	14.078	14.433	11.095		430.476	14.311	13.214	13.341	8	10.762	11.915	11.926
432.381	15.845	13.21	31.009	7.841	14.399	12.926	11.076	9.468	11.099	10.703	13.167	15.073	10.27	13.814	14.737	15.202	15.757	12.689	14.024	13.36	21.145	10.37	17.613	9.317	18.64	10.727	17.759	13.05	10.821	39.482	26.492	22.07	16.721	15.469	12.355	10.572	10.047	13.229	13.711	11.67		432.381	13.992	14.079	12.889	8.741	10.316	12.401	11.497
434.286	17.017	13.169	29.207	7.437	14.007	13.723	10.498	9.489	10.77	11.333	13.018	14.607	11.189	12.503	13.399	15.618	14.594	12.701	14.479	12.981	21.085	9.881	17.414	8.983	18.166	9.678	17.829	12.88	10.851	38.232	25.359	21.014	16.829	15.263	12.474	11.138	10.111	13.771	13.711	11.687		434.286	14.206	15.089	12.834	8.714	10.301	12.316	11.18
436.19	18.547	12.84	26.25	7.199	13.182	13.195	10.701	9.234	11.028	10.885	13.536	14.174	11.423	13.31	13.564	16.884	14.515	11.539	13.413	12.495	21.036	9.133	15.306	8.696	18.491	9.19	17.342	12.115	11.4	36.268	26.383	21.007	16.654	14.712	12.311	11.421	10.681	13.88	13.274	11.335		436.19	14.572	14.996	13.76	8.357	10.218	12.312	11.386
438.095	19.272	12.913	25.052	7.444	12.514	12.827	10.929	8.475	11.441	10.224	14.387	14.288	11.477	14.938	14.391	16.231	14.777	11.808	13.311	12.056	20.806	9.044	14.117	8.683	19.314	9.628	17.989	12.215	11.715	38.821	27.992	21.615	17	15.806	13.47	10.862	10.384	13.139	13.498	11.196		438.095	14.603	14.736	13.954	8.491	10.508	11.996	12.074
440	19.267	15.196	24.741	8.02	13.02	12.805	10.744	9.78	11.507	10.479	14.256	15.196	11.063	14.793	14.498	13.936	14.47	12.497	13.407	12.846	20.964	9.6	14.36	8.826	19.634	10.826	18.455	12.78	11.536	40.554	27.297	22.252	17.403	16.112	13.717	11.021	10.405	12.813	13.945	11.464		440	14.615	15.107	13.217	8.33	11.223	12.486	11.921
441.905	19.19	16.457	22.216	7.788	12.986	12.645	11.275	10.489	11.77	10.38	14.274	15.566	10.486	15.124	14.798	14.462	13.797	11.928	13.868	13.687	21.315	10.541	14.297	9.765	19.737	11.107	18.396	12.745	12.404	38.964	27.352	22.322	17.185	15.556	13.323	12.234	10.616	13.428	13.682	11.788		441.905	15	14.964	13.654	8.473	11.197	13.081	11.577
443.81	18.603	15.201	19.56	7.192	12.243	12.883	11.393	9.596	11.761	10.286	14.44	14.333	11.108	15.503	14.333	16.439	13.218	11.88	14.21	13.397	21.565	10.281	13.568	10.77	19.286	11.132	18.92	12.7	12.864	38.25	27.188	22.692	17.523	15.431	13.251	12.179	10.48	14.114	14.522	12.212		443.81	15.93	14.471	13.793	9.027	10.648	12.66	11.698
445.714	17.513	14.799	18.448	7.815	12.662	13.307	11.393	9.915	11.484	10.036	14.554	14.658	12.072	14.703	14.535	17.405	12.782	11.635	14.251	13.173	21.802	10.067	13.297	12.33	18.526	10.116	18.658	12.68	11.779	37.393	26.406	22.657	17.577	14.562	13.191	11.09	10.466	14.006	14.383	11.352		445.714	15.043	14.118	13.903	9.625	11.083	13.178	12.063
447.619	17.241	15.429	17.086	8.848	12.966	12.835	12.043	12.369	12.197	10.057	15.387	15.667	11.748	13.848	14.605	16.283	12.614	11.509	14.347	13.159	21.54	10.63	13.874	13.53	17.897	9.463	18.07	12.985	11.043	36.893	26	21.888	16.631	12.65	12.96	10.786	10.082	13.771	12.811	10.67		447.619	14.708	14.046	13.65	9.241	12.016	13.32	12.36
449.524	17.315	16.196	15.448	8.477	13.318	12.234	12.242	13.511	12.737	9.901	17.44	14.817	11.396	13.6	14.494	15.954	13.02	11.868	15.186	13.449	21.306	10.096	14.685	13.13	18.966	10.058	18.604	13.36	11.068	37.804	25.609	21.35	16.648	12.106	12.446	10.8	10.104	13.819	12.692	10.749		449.524	15.607	14.618	12.825	8.857	11.927	12.648	11.471
451.429	18.668	14.644	14.819	8.272	13.182	12.926	11.796	11.277	12.028	11.047	23.042	14.959	10.586	14.124	14.63	16.064	12.5	11.317	15.946	12.907	20.863	9.459	14.153	12.296	19.989	9.264	19.508	12.45	11.702	35.804	25.336	21.287	16.587	12.094	12.566	11.021	10.656	14.699	12.493	10.799		451.429	15.222	14.896	13.06	9.429	10.922	12.17	12.138
453.333	19.082	13.498	15.207	8.868	14.304	12.931	11.512	11.801	12.202	12.099	26.976	15.174	10.937	14.559	14.691	16.74	12.243	11.425	14.677	13.061	21.641	10.296	14.252	11.7	19.297	8.727	19.043	11.435	12.485	34.518	24.211	22.091	16.607	11.75	12.127	11.117	10.878	14.59	13.07	11.799		453.333	14.84	14.718	13.392	9.527	10.824	11.964	12.487
455.238	17.177	14.566	15.534	9.04	16.041	13.013	11.787	12.489	12.648	11.146	24.72	14.913	11.622	14.883	14.16	16.486	13.579	12.832	13.305	13.64	22.355	10.533	15.82	11.361	19.457	9.686	18.385	12.005	11.872	35.821	23.719	22.105	17.114	12.238	11.853	11.276	10.785	13.873	14.01	11.827		455.238	14.296	13.932	14.636	8.929	11.301	12.101	12.37
457.143	16.94	16.087	15.802	10.576	15.047	13.541	11.853	11.816	12.099	10.417	21.452	15.639	12.072	14.945	13.835	15.503	14.426	12.467	12.407	13.393	22.286	9.815	16.135	10.043	19.954	10.868	18.722	11.905	11.515	38.375	23.961	22.748	17.262	12.331	12.701	11.366	11.093	14.44	14.025	11.385		457.143	14.677	13.707	14.396	8.652	10.782	11.972	12.608
459.048	17.022	15.594	16.043	11.185	14.365	13.602	11.716	12.22	11.54	10.068	19.637	16.384	12.667	13.952	14.28	16.145	13.198	11.653	11.617	12.935	22.681	9.926	17.514	9.27	20.017	10.339	18.936	11.01	11.677	40.589	25.078	23.629	17.205	12.681	12.948	11.441	10.918	14.765	14.323	11.966		459.048	15.572	14.271	13.055	8.768	10.124	11.644	11.503
460.952	16.164	14.256	15.733	9.808	14.98	13.312	11.758	11.461	11.568	10.318	18.131	16.237	11.595	13.731	14.654	16.815	12.228	11.485	11.246	13.238	22.238	9.859	16.946	9.739	18.914	10.628	18.829	11.78	12	41.143	26.914	23.455	17.164	12.994	12.865	11.862	10.767	14.096	14.209	12.19		460.952	15.101	14.929	12.677	9.018	10.036	11.198	11.598
462.857	16.677	14.845	14.871	8.98	15.209	13.437	11.521	10.681	11.638	10.276	16.179	15.251	11.712	12.91	14.403	16.699	12.797	11.491	11.82	13.304	22.173	9.919	14.387	9.487	18.137	11.81	18.332	12.9	12.26	39.964	25.539	23.252	17.336	13.025	13.458	11.697	10.968	14.771	13.527	11.922		462.857	14.066	14.825	12.41	8.955	10.166	11.267	12.201
464.762	17.414	16.416	14.198	9.132	15.331	14.052	11.237	10.603	11.869	10.141	15.137	15.215	12.541	12.476	14.412	17.89	13.386	11.982	12.359	13.785	21.863	10.163	14.081	9.322	19.097	11.322	18.818	13.18	12.102	36.054	24.141	22.671	17.762	13.2	13.486	11.228	10.853	15.639	13.876	11.603		464.762	14.233	14.146	12.949	8.589	9.948	12.332	12.905
466.667	16.75	16.361	14.466	9.464	14.635	13.429	11.327	10.518	11.901	10.323	15.274	15.813	12.604	13.8	14.189	17.035	13.995	12.467	11.617	13.659	21.339	10.378	13.937	9.587	18.463	11.207	20.374	13.33	11.94	36.214	24.562	23.168	17.638	12.644	12.43	11.028	11.409	14.675	13.637	11.43		466.667	14.506	13.954	13.862	8.732	10.907	12.53	13.333
468.571	16.108	14.315	14.293	9.735	14.196	13.121	11.555	10.433	12.033	10.771	14.5	16.137	12.802	13.676	14.317	16.168	13.401	11.467	11.449	12.766	21.698	10.289	13.622	9.4	18.291	11.256	19.283	12.995	11.23	39.75	24.617	23.007	16.839	12.163	11.578	11.228	11.233	13.831	12.886	11.654		468.571	14.607	13.964	13.507	9.295	11.435	12.287	12.55
470.476	16.19	14.087	12.948	8.894	13.858	13.026	11.545	9.262	12.451	11.073	13.25	15.132	12.072	13.731	14.56	17.399	12.411	9.988	11.707	12.537	20.952	10.385	13.459	8.6	18.383	10.678	18.064	11.985	11.17	38.446	23.773	21.503	16.889	12.281	11.821	11.2	10.552	13.392	13.403	11.229		470.476	14.907	14.225	13.323	10.071	10.865	12.372	11.952
472.381	18.638	14.644	13.578	8.185	12.662	12.762	11.825	10.099	12.38	10.88	13.458	14.534	11.225	15.166	14.226	16.78	12.252	10.79	11.701	12.645	20.516	10.104	14.658	8.578	18.023	9.934	17.834	11.325	11.37	38.25	24.062	21.427	17.329	11.731	11.964	10.841	10.143	13.018	13.373	10.52		472.381	14.891	14.875	13.313	9.214	11.326	11.336	12.063
474.286	20.522	15.813	14.603	7.815	12.345	12.632	11.483	11.206	12.315	10.859	13.911	14.831	12.045	15.738	14.469	15.769	12.391	12.12	11.838	13.425	21.738	9.556	15.09	9.174	18.097	10.314	17.989	12.19	11.064	37.411	24.586	22.371	17.007	11.788	12.61	11.297	10.211	12.813	13.413	11.358		474.286	14.992	15.546	13.424	8.83	11.746	11.239	11.926
476.19	19.793	16.621	14.284	7.695	13.007	12.394	10.938	10.404	12.099	10.995	13.583	15.023	12.712	14.524	14.477	15.399	13.218	12.15	11.97	13.949	21.419	10.17	14.937	9.217	18.491	11.678	18.551	13.38	11.447	35.161	23.93	23.343	16.282	11.913	12.498	11.407	10.771	12.753	12.841	12.022		476.19	14.747	15.129	14.005	9.062	11.104	12.04	11.704
478.095	19.047	15.639	14.397	8.132	12.622	12.212	10.967	10.128	11.399	11.068	13.744	15.397	12.369	12.786	14.815	15.855	13.361	11.419	12.24	13.238	19.758	10.489	14.423	9.404	18.406	11.017	18.797	12.98	11.626	35.393	22.625	23.07	16.094	11.962	11.478	10.745	10.337	12.958	12.861	11.559		478.095	14.253	14.339	13.447	8.857	10.114	11.543	12.212
480	17.159	14.95	14.784	8.099	11.703	12.182	10.844	10.525	10.822	10.214	13.298	14.703	12.063	12.545	14.185	16.445	13.421	10.964	11.97	12.757	20.782	10.156	12.784	10.87	17.417	9.826	19.235	12.415	11.081	36.321	22.875	22.35	15.987	12.469	10.92	10.138	10.039	13.247	13.871	11		480	14.066	13.471	13.12	8.705	10	11.567	12.841
481.905	15.961	15.091	13.034	8.013	11.716	11.974	10.863	10.511	11.3	10.01	12.744	13.813	11.441	13.559	13.37	15.803	12.842	11.156	11.413	12.43	21.298	9.933	12.288	12	17.486	10.521	18.706	13.615	11.009	36.536	24.727	22.455	15.913	12.256	11.092	9.662	10.208	12.994	13.358	11.128		481.905	14.79	13.882	13.705	8.536	10.181	12.053	12.704
483.81	15.853	15.251	13.871	8.199	11.838	11.831	13.682	9.745	12.394	10.135	13.732	14.685	11.162	13.303	13.539	15.462	12.361	11.737	11.144	12.028	21.56	9.896	14.054	11.87	18.154	10.562	17.219	13.92	10.157	33.946	24.609	22.196	15.789	11.25	11.06	10.193	10.179	12.681	12.821	11.134		483.81	14.226	15.061	13.645	9.08	10.642	11.866	12.069
485.714	15.56	14.717	14.759	8.205	12.155	12.693	17.517	9.759	11.901	9.062	14.077	14.799	11.018	13.021	14.033	15.855	12.337	11.437	10.946	11.995	21.706	10.059	13.955	11.861	18.263	10.802	17.342	13.605	10.319	34.214	23.102	21.098	15.883	11.55	11.582	11.462	10.33	13.187	12.965	10.832		485.714	13.385	14.186	13.465	8.875	10.648	12.02	12.095
487.619	15.241	14.055	13.647	7.967	12.608	13.052	18.91	9.596	11.554	9.307	15.137	14.233	11.495	12.648	14.218	15.688	12.564	10.976	13.653	11.86	20.234	9.556	17.198	11.404	18.223	11.397	17.561	13.94	11.026	35.857	24.062	21.126	16.852	12.694	12.442	11.138	10.559	13.898	12.97	11.017		487.619	14.027	13.346	14.014	8.777	10.264	11.628	12.259
489.524	16.444	14.694	14.293	7.881	13.892	12.623	18.777	9.603	12.31	10.135	18.625	14.804	11.964	12.366	14.996	15.694	12.267	11.467	15.222	12.579	20.185	9.993	18.036	10.439	17.851	11.215	17.193	14.015	10.298	37.304	25.117	22.462	16.993	12.7	11.781	10.538	10.065	13.482	13.418	11.508		489.524	13.911	13.343	13.512	8.42	10.596	11.19	12.243
491.429	17.147	16.247	13.638	7.788	15.595	12.593	17.398	10.376	11.798	10.208	23.554	14.913	11.216	12.124	15.753	16.006	11.901	11.09	14.473	13.421	19.637	10.096	14.712	9.665	18.143	10.545	17.717	14.44	10.302	37.071	24.25	21.79	16.171	12.663	11.008	10.448	9.95	12.386	13	11.43		491.429	14	13.164	12.977	7.616	10.016	11.437	11.561
493.333	16.103	15.973	13.966	8.172	15.642	12.515	15.768	10.426	11.451	10.99	25.31	15.073	11.279	12.517	16.021	16.249	12.025	11.719	15.132	13.467	20.012	9.733	14.369	9.609	18.354	10.306	18.16	15.12	11.064	34.714	23.695	20.895	16.839	14.906	11.47	10.966	10.742	13.554	12.701	10.927		493.333	14.004	13.85	12.972	7.902	9.658	11.381	11.09
495.238	15.996	14.242	15.233	8.325	15.243	12.792	14.265	10.596	11.751	11.464	23.018	15.361	11.874	13.49	16.737	16.566	11.96	12.114	15.257	12.724	20.867	10.548	13.613	9.991	18.891	10.446	18.364	15.225	10.919	36.232	24.156	22.035	17.315	16.962	11.984	11.462	10.548	14.12	12.99	10.955		495.238	13.837	14.282	13.069	8.402	10.29	11.599	12.28
497.143	16.332	13.169	15.431	8.146	15.189	12.983	13.123	10.894	11.906	10.99	20.375	15.553	12.234	13.738	16.988	17.272	12.842	12.06	15.102	13.075	21.226	11.274	14.838	9.7	18.497	10.058	18.465	15.205	10.519	38.107	25.977	22.126	17.144	16.025	12.096	10.759	10.165	13.62	13.095	11.324		497.143	13.918	13.786	13.378	8.464	10.275	11.559	12.444
499.048	15.815	14.119	15.353	8.556	14.986	12.922	13.322	10.319	11.61	10.406	19.065	15.913	11.766	13.069	17.403	17.613	13.03	12.18	15.359	13.014	20.552	10.437	15.667	9.517	18.526	9.628	18.299	14.355	11.051	38.196	25.602	22.371	17.527	16.094	11.645	10.324	10.663	14.253	14.005	11.196		499.048	14.393	13.829	13.18	8.009	10.71	11.17	11.646
500.952	15.69	16.53	14.871	8.848	15.649	13.156	12.848	9.901	11.887	11.656	18.196	16.073	11.874	11.862	17.148	16.41	12.837	11.156	13.85	12.411	20.875	9.23	14.486	8.957	18.594	10.339	17.893	14.06	11.191	38.286	25.344	23.406	17.007	16.462	11.036	10.414	10.577	14.036	14.209	10.503		500.952	15.171	14.3	13.023	8.473	11.223	11.032	11.772
502.857	15.961	16.265	15.207	8.854	15.318	14.152	11.313	9.716	11.873	12.224	15.429	15.982	12.063	12.91	16.486	15.37	12.861	11.731	13.305	13.949	21.19	8.978	14.847	8.674	18.543	11.182	18.54	15.135	11.587	36.054	24.93	23.14	16.594	15.669	11.283	11.028	10.258	14.289	13.881	10.832		502.857	14.817	14.55	12.456	9.027	10.689	11.008	11.915
504.762	15.927	14.662	15.216	9.457	14.608	13.701	11.806	9.922	11.54	10.328	14.607	15.393	11.207	14.338	17.016	15.555	12.649	12.275	13.659	13.995	20.685	9.044	14.414	9.978	19.017	12.025	19.011	15.265	11.949	34.911	23.938	22.49	17.523	16.206	11.323	11.986	10.251	14.476	13.602	11.497		504.762	13.988	13.957	12.548	9.071	10.332	11.089	11.614
506.667	16.875	15.251	14.871	9.768	15.162	13.325	12.588	10.631	12.052	9.74	15.131	15.9	11.207	14.772	17.115	16.168	12.614	12.048	13.455	13.537	21.472	9.644	14.126	10.291	18.977	11.843	19.209	14.09	11.213	37.125	24.266	22.944	17.554	16.906	11.06	11.821	10.735	13.313	13.244	11.816		506.667	14.074	13.789	13.276	8.991	10.119	10.899	11.46
508.571	18.392	15.913	15.207	9.06	14.459	13.459	11.455	10.128	11.512	10.318	13.536	16.014	11.559	15.041	16.646	15.231	12.946	12.042	14.359	13.93	21.194	9.563	15.189	11.548	18.354	11.24	18.342	13.615	11.434	40.5	24.25	22.958	17.386	16.444	11.108	11.331	10.756	12.307	12.597	12.291		508.571	14.374	14.304	13.009	8.196	9.979	12.227	11.81
510.476	19.039	14.767	15.603	8.669	13.791	12.519	10.981	10.191	11.296	10.521	12.036	14.621	10.856	13.966	16.206	15.272	12.317	12.138	13.653	13.435	20.944	9.4	16.378	13.43	18.423	11.231	17.508	13.96	11.621	40.661	24.094	21.762	17.285	15.538	11.104	10.966	10.1	12.596	12.682	11.743		510.476	14.584	15.186	12.935	8.134	9.927	12.822	11.466
512.381	19.147	14.205	15.078	8.543	13.419	12.853	11.322	11.291	11.854	11.24	12.268	14.461	11.135	12.552	16.214	15.919	11.861	12.192	13.186	13.379	21.052	10.496	17.838	13.322	18.897	10.306	17.342	13.755	11.362	38.643	23.344	21.217	17.02	14.2	10.853	10.359	10.337	13.771	14.005	11.486		512.381	14.63	15.257	13.249	8.455	10.088	12.126	11.296
514.286	19.168	14.543	14.017	8.013	13.304	12.719	11.858	10.95	11.465	11.734	13.173	15.384	11.73	12.117	16.621	15.214	11.96	12.425	13.281	13.042	21.04	10.719	15.207	12.057	18.697	10.463	16.422	14.3	11.183	38.339	22.961	20.538	16.916	12.619	10.912	9.772	10.452	14.229	13.169	11.531		514.286	14.444	14.643	13.24	8.357	10.606	12.421	11.661
516.19	18.095	15.434	13.879	7.96	14.122	12.714	11.697	10.355	11.761	11.333	14.048	15.648	11.261	12.531	16.671	16.306	12.134	12.898	12.719	13.36	20.609	9.607	13.613	11.674	18.291	10.868	17.385	14.085	11.094	37.571	23.391	20.678	17.178	11.788	11	9.869	10.81	13.361	12.119	11.631		516.19	13.767	14.868	13.06	9.125	10.617	12.202	12.132
518.095	16.905	16.292	14.362	8.49	13.838	12.719	11.156	11	12.362	10.812	14.238	15.361	11.775	13.407	17.663	16.329	12.302	12.545	13.587	14.262	20.512	9.711	14.973	12.196	18.571	11.347	17.722	13.545	11.145	35.518	22.961	22.154	18.638	12.369	11.163	11.262	10.695	13.705	12.945	11.955		518.095	14.195	14.464	13.23	9.062	9.922	12.15	11.571
520	16.121	14.731	15.181	8.192	13.595	12.939	11.289	10.745	12.291	10.729	14.78	15.187	12.667	14.234	17.683	14.936	12.069	12.299	14.461	14.565	20.948	10.2	14.874	11.883	19.011	10.678	17.513	13.015	10.711	35.696	22.68	21.462	18.389	12.706	11.434	11.234	10	14.235	14.09	11.933		520	14.65	13.707	13.401	9	9.637	12.211	10.81
521.905	16.341	13.169	14.517	7.781	13.595	13.784	11.152	9.894	11.859	10.089	14.798	15.059	12.847	14.034	16.251	15.324	12.322	11.808	14.144	13.631	20.282	9.956	14.126	11.317	18.611	10.256	18.064	12.14	10.97	34.875	23.148	21.79	17.564	12.113	11.012	10.186	10.276	13.596	14.124	11.827		521.905	14.339	13.725	13.009	8.777	9.482	11.522	11.386
523.81	16.142	12.932	14.078	8.026	12.669	12.84	10.9	9.844	10.939	9.807	14.024	14.447	11.541	13.248	16.058	15.087	12.282	10.916	13.701	12.626	20.044	9.585	14.586	11.757	19.16	10.107	17.503	11.785	11.064	33.536	24.109	23.308	17.302	11.706	10.964	11.338	10.695	13.271	13.015	11.33		523.81	14.813	14.254	13.419	8.384	9.409	11.611	12.016
525.714	15.586	14.041	14.328	8.483	13.426	12.377	10.768	10.27	11.08	11.01	13.732	14.708	11.432	12.738	15.749	15.006	12.386	11	12.653	13.112	20.008	9.704	14.468	11.37	19.046	10.066	17.021	11.92	10.638	37.5	23.586	21.455	17.138	11.431	11.032	11.89	10.803	13.325	12.264	11.43		525.714	14.93	14.739	13.899	8.446	9.736	11.664	12.148
527.619	16.009	16.676	13.716	7.98	13.75	13.143	10.891	10.901	11.624	11.875	13.06	15.142	11.55	12.421	14.798	16.78	12.604	11.856	12.371	13.565	20.387	10.459	14.721	10.448	18.726	10.917	17.567	12.01	11.115	37.893	23.602	20.378	17.477	11.2	10.614	10.807	11.473	13.018	12.507	11.726		527.619	14.397	14.525	13.005	8.411	9.85	11.057	12.212
529.524	16.142	16.452	13.293	8.152	13.27	13.273	11.223	10.468	11.404	10.297	13.399	14.932	11.243	12.834	15.255	16.665	12.767	11.946	12.216	13.654	20.903	10.356	14.396	10.387	19.126	10.223	17.925	11.68	11.272	37.321	23.812	21.608	17.151	11.062	10.359	10.8	11.108	12.873	13.627	11.039		529.524	13.564	13.961	12.581	9.045	9.451	11.008	11.212
531.429	15.931	13.918	12.931	8.576	13.176	12.762	11.616	10.113	11.418	9.13	13.911	14.731	11.423	13.421	16.243	15.803	12.624	11.359	10.994	12.743	20.569	9.393	13.964	10.07	18.2	9.752	17.578	11.46	11.051	39.071	22.227	21.993	17.185	11.619	10.422	10.614	10.394	13.343	13.677	10.441		531.429	13.397	13.671	12.226	9.402	9.793	10.85	11.519
533.333	15.78	13.648	13.741	7.768	12.682	13.342	11.483	10.326	11.075	9.854	14.31	14.356	11.369	13.772	16.387	16.277	12.337	11.677	10.76	12.379	20.129	9.652	14.351	10.404	18.64	10.62	17.824	11.59	11.089	39.232	21.984	21.867	17.315	11.781	11.096	10.069	10.885	13.554	13.617	11.302		533.333	13.626	13.382	12.184	9.089	10.228	10.652	11.688
535.238	15.681	13.626	14.543	7.311	13	13.597	11.057	9.22	10.962	10.115	16.518	13.845	10.847	14.752	16.062	17.37	11.678	12.371	11.461	12.35	20.351	10.044	15.342	11.122	19.794	11.248	17.781	12.035	10.813	38.893	21.25	22.035	17.171	12.219	10.944	9.869	10.398	14.283	13.672	10.961		535.238	13.128	13.411	12.111	9.143	9.87	10.899	10.794
537.143	16.039	13.758	14.698	7.57	13.101	12.779	11.853	9.326	11.178	10.062	22.696	14.543	11.126	14.303	15.835	17.231	11.361	12.976	11.15	12.551	20.867	9.756	15.108	10.965	19.097	10.554	17.492	12.38	10.902	35.482	20.492	21.65	17.614	13.031	10.51	10.352	9.763	13.819	13.662	9.855		537.143	13.21	12.971	12.548	9.375	9.917	11.219	11.101
539.048	16.427	15.831	14.379	8.238	13.628	12.784	11.773	10.482	10.995	10.188	27.327	15.589	11.459	12.697	15.893	15.682	11.896	12.455	11.94	12.93	20.548	9.926	13.676	11.022	20.023	9.992	17.278	13.345	10.953	35.625	21.633	21.944	17.497	11.863	10.737	11.186	10.19	12.729	13.716	10.497		539.048	14.268	13.425	12.862	8.884	9.446	10.955	11.132
540.952	16.599	15.895	13.716	8.278	14.993	13.022	11.109	10.759	11.16	10.146	24.393	15.447	11.423	13.207	15.449	14.74	12.559	12.126	13.162	13.271	20.823	9.43	14	11.004	21.217	10.157	17.198	13.2	10.723	37.732	22.039	21.294	16.315	11.325	10.88	10.952	10.158	13.289	13.721	11.179		540.952	14.397	13.639	12.433	8.589	9.041	10.757	11.481
542.857	16.75	14.046	13.293	7.377	14.399	12.584	11.085	10.674	11.31	9.854	20.101	15.991	11.099	13.814	14.959	13.942	12.426	12.485	13.659	13.799	20.867	9.763	13.811	11.461	22.52	10.231	17.064	12.17	11.034	35.571	21.086	20.559	16.232	14.356	10.789	10.993	10.527	13.952	13.746	11.475		542.857	13.646	12.821	12.41	8.795	9.658	10.713	11.794
544.762	19.332	13.457	13.621	7.199	14.128	12.667	10.962	10.56	11.263	10.005	17.488	16.703	11.189	14.428	14.984	13.919	11.856	12.419	14.084	13.407	20.137	10.644	14.514	13.109	24.309	10.752	16.92	12.68	10.638	34.875	22.273	21.503	17.396	16.619	11.131	10.455	10.706	14.657	13.214	11.559		544.762	13.163	12.779	12.323	8.839	9.865	10.595	11.069
546.667	20.832	13.767	14	7.974	13.703	13.113	10.834	10.844	11.221	11.302	15.804	15.817	11.351	14.779	14.658	14.341	12.178	12.066	13.036	12.935	19.831	9.956	14.802	13.065	24.183	10.909	17.604	13.35	10.766	36.411	23.664	22.098	17.326	16.606	11.414	9.559	10.197	14.398	13.204	11.346		546.667	13.607	13.675	12.115	8.277	8.855	10.814	10.921
548.571	20.177	14.489	14.716	8.417	12.338	13.377	11.209	10.553	10.948	11.953	15.958	16.023	11.559	13.697	14.251	13.694	12.267	11.91	13.533	13.196	19.976	9.97	13.982	11.904	23.44	10.025	18.369	12.6	11.34	36.589	22.789	21.706	16.584	16.206	11.092	10.821	10.265	13.723	13.095	11.654		548.571	13.883	14.25	12.498	8.161	9.104	11.174	11.857
550.476	19.582	16.123	15.259	7.907	11.932	12.693	11.379	10.213	11.258	11.172	15.512	16.306	12.577	13.069	13.593	14.665	11.708	11.868	14.036	12.897	20.367	10.007	13.802	11.035	22.68	10.198	18.096	12.515	11.217	36.375	22.414	21.573	16.477	15.663	10.976	11.607	9.986	13.054	12.866	11.464		550.476	14.253	14.243	13.774	8.83	10.295	11.749	12.333
552.381	18.349	15.397	13.664	7.709	11.514	12.277	10.934	11	10.991	11.193	14.286	15.315	12.009	13.455	13.239	15.803	11.842	11.868	12.461	12.57	20.625	10.081	12.928	10.035	21.223	10.438	17.679	12.78	11.204	36.196	21.969	22.483	16.101	15.138	11.08	11.317	9.627	13.096	13.353	10.609		552.381	14.28	13.814	13.585	8.357	9.632	11.919	11.868
554.286	17.134	13.443	13.862	8.417	11.108	12.403	10.896	11.489	10.995	10.661	14.744	15.146	11.036	14.469	13.679	15.237	11.614	11.737	11.497	13.388	20.407	10.622	13.072	9.483	21.183	9.777	17.219	12.63	11.413	34.571	22.383	21.077	15.946	14.669	11.124	11.538	9.448	14.193	14.09	10.754		554.286	13.307	13.136	12.783	8.205	9.238	11.219	11.46
556.19	15.815	13.365	15.052	8.583	10.73	12.675	10.919	10.496	11.911	9.318	14.756	15.548	10.73	14.593	14.144	14.087	11.658	11.844	12.257	13.715	20.399	11.089	12.514	8.835	20.703	10.388	16.957	12.885	11.417	35.196	23.648	20.678	16.238	14.962	10.857	11.248	9.509	14.036	14.428	11.469		556.19	13.572	13.189	12.719	8.205	9.881	10.717	11.19
558.095	16.289	13.324	14.526	9.106	10.75	13.558	10.668	10.17	11.69	9.396	13.167	14.721	10.045	13.414	14.128	14.486	11.861	12.096	11.76	13.206	20.605	10.867	11.865	8.743	19.554	11.215	16.578	12.145	11.038	35.375	22.484	21.909	16.849	14.494	11	11.379	9.717	13.41	13.169	11.011		558.095	13.681	13.779	12.083	8.286	10.052	10.15	11.455
560	16.03	14.256	13.724	8.927	11.02	13.498	10.507	9.553	11.577	9.203	12.268	13.927	9.865	12.51	14.016	14.908	11.545	11.078	10.647	12.037	20.456	10.333	12.865	8.8	19.549	10.835	16.102	11.19	10.617	34.964	21.391	21.168	17.03	14.188	10.494	11.476	10.276	12.807	12.706	10.743		560	13.903	14.121	12.065	7.875	9.85	10.543	11.587
561.905	15.246	14.667	13.457	8.305	10.73	13.532	10.626	9.901	11.427	9.453	12.196	14.402	9.91	12.662	14.362	13.78	12.411	11.419	11.539	11.762	20.738	9.896	12.64	8.613	19.617	10	16.096	11.505	10.847	36.946	22.062	21	16.956	14.262	10.454	10.641	10.846	12.904	14.08	11.196		561.905	13.922	13.393	11.82	7.893	9.995	11.223	11.328
563.81	15.216	13.562	13.216	8.715	11.02	14.043	9.948	10.794	11.319	9.63	12.53	14.744	10.117	13.407	14.309	15.116	11.53	11.407	11.784	12.369	20.246	9.43	12.505	8.561	18.943	10.058	17	11.06	11.417	37.321	22.938	21.413	17.151	14.731	11.327	10.628	11.219	13.193	13.637	11.246		563.81	13.381	13.004	10.935	8.509	9.725	10.757	10.725
565.714	15.026	12.539	12.328	8.848	11.48	12.957	9.569	10.809	11.211	8.844	12.161	14.799	10.072	12.414	14.247	15.867	11.03	10.665	10.635	12.056	19.399	8.8	12.847	8.561	18.366	10.421	17.663	11	11.66	37.857	23.023	21.007	15.946	14.35	10.486	11.131	11.24	12.392	12.06	10.447		565.714	13.992	12.864	11.963	8.098	9.466	10.583	10.593
567.619	14.703	12.169	12.845	8.775	13.25	12.147	9.919	10.631	10.784	8.958	11.863	14.936	9.793	12.421	15.358	15.191	12.267	11.449	10.641	12.935	20.935	8.756	14.252	8.739	18.114	9.81	17.567	11.14	10.621	36.054	22	20.497	15.117	14.169	9.518	10.462	10.154	12.38	11.801	10.291		567.619	14.136	12.821	12.641	8.616	9.891	10.66	10.915
569.524	14.504	13.215	13.922	8.238	13.919	12.688	10.479	9.752	10.995	10.672	12.655	15.712	10.694	13.248	16.21	15.121	12.252	11.587	11.18	12.855	21.169	9.963	13.739	8.491	18.206	9.719	17.615	10.95	10.021	34.714	22.117	19.084	15.463	14.4	10.339	10.324	9.853	12.958	12.06	10.86		569.524	13.65	13.3	11.931	9.25	10.047	10.466	11.122
571.429	15.147	15.224	13.44	8.377	13.689	12.848	10.445	9.723	11.592	10.714	13.411	16.014	11.387	13.952	16.506	14.497	12.139	12.102	11.725	11.748	20.327	11.141	14.766	8.957	18.891	10.603	17.262	11.705	10.843	37.214	22.891	19.483	16.054	13.594	12.418	11.317	10.29	13.229	12.627	11.268		571.429	13.607	13.182	12.083	9.429	10.15	10.7	11.317
573.333	15.435	15.553	13.466	9.205	14.473	12.957	10.564	10.021	11.709	9.391	13.048	16.21	10.748	14.028	16.872	14.416	12.228	12.713	12.365	12.785	20.065	10.126	15.784	9.183	18.994	10.554	17.642	11.83	10.553	36.554	22.93	21.105	16.762	13.087	13.311	11.214	9.767	13.108	12.881	10.626		573.333	13.607	12.911	13.198	8.696	9.674	11.312	10.815
575.238	17.276	14.689	14.647	9.662	14.405	13.355	10.72	9.745	11.277	9.464	12.661	16.813	10.865	12.738	17.255	14.584	12.045	13.263	10.91	13.285	20.109	9.689	16.748	9.043	19.411	10.231	18.091	12.295	10.502	35.286	22.344	21.357	17.104	12.606	13.171	10.283	10.233	13.645	12.766	10.229		575.238	13.148	13.211	12.862	8.482	9.321	11.134	10.783
577.143	19.078	13.726	14.75	9.649	13.385	12.944	10.711	9.404	10.944	9.536	13.381	16.438	11.045	12.228	17.165	14.798	11.356	14.281	10.072	12.5	20.105	10.719	18.739	9.97	19.394	9.818	17.84	12.28	10.536	35.5	22.164	21.308	16.809	11.575	13.514	10.49	11.047	14.265	13.085	10.291		577.143	12.837	13.775	12.065	9.089	9.622	11.397	10.942
579.048	18.116	12.447	13.793	8.775	12.878	12.281	10.905	9.908	10.563	8.958	13.25	16.046	10.505	11.959	16.971	14.179	11.114	13.503	10.635	12.402	19.613	11.104	18.658	12.378	18.983	10.207	17.594	12.02	10.626	39.536	21.18	20.615	16.054	11.438	13.171	11.407	10.703	13.596	13.144	10.123		579.048	13.125	13.414	12.147	8.214	9.378	11.522	10.894
580.952	17.272	12.142	13.069	8.066	13.304	12.32	10.417	9.915	10.418	8.714	13.137	15.457	10.09	12.234	16.79	13.798	11.678	12.665	12.707	12.332	19.927	10.193	18.955	12.87	18.383	10.264	17.037	11.9	10.655	40.679	21.062	20.266	15.49	11.975	13.004	11.8	10.548	12.651	12.726	10.503		580.952	12.728	12.7	12.276	8.036	8.917	11.595	10.577
582.857	17.237	13.498	13.802	7.338	12.527	12.26	10.043	10.191	10.441	8.865	13.101	14.247	10.568	12.869	16.037	14.74	11.871	12.856	13.635	11.939	20.371	8.904	17.748	11.648	17.257	9.736	16.299	10.995	10.128	35.054	22.727	20.413	15.698	11.325	12.709	10.793	10.692	12.723	12.184	10.464		582.857	13.358	12.532	12.604	8.714	9.813	11.713	10.381
584.762	18.177	15.279	14.405	6.808	11.899	11.87	10.545	9.936	10.202	9.281	12.69	14.274	10.82	13.828	15.864	15.595	11.228	12.659	13.204	12.028	20.145	9.341	16.847	11.357	17.537	10	16.572	11.145	10.434	33	22.695	20.441	16.111	10.844	12.876	10	11.014	12.952	12.597	10.134		584.762	14.385	12.832	12.733	9.018	10.518	11.251	10.762
586.667	18.707	14.858	13.767	7.119	11.439	11.528	10.28	9.809	10.291	9.786	13.53	14.84	11.063	13.552	16.432	15.705	11.233	12.383	13.946	12.388	19.641	9.985	15.27	10.687	17.131	10.446	16.909	11.615	10.711	35.286	20.578	19.762	15.943	10.844	13.713	10.69	10.857	13.151	13.577	11		586.667	14.335	13.257	12.171	8.17	10.104	11.498	10.598
588.571	17.948	14.247	14.043	7.583	11.392	11.771	9.668	11.248	11.066	9.906	16.756	16.438	11.649	13.697	15.605	15.127	12.064	13.467	14.635	13.341	20.093	10.696	14.315	10.591	16.697	10.174	17.31	11.365	10.6	34.018	20.031	20.014	15.379	10.606	13.311	10.566	10.699	13.133	12.92	11.363		588.571	14.3	13.543	11.548	8.125	9.513	11.17	10.429
590.476	16.841	13.447	13.871	7.642	11.588	12.636	10.682	10.95	11.385	10.76	21.155	20.279	11.676	14.262	15.325	14.618	12.139	14.557	13.766	13.089	20.54	10.681	14.297	11.548	17.611	9.744	17.513	11.285	11.183	32.786	22.609	20.329	16.409	11.275	13.263	10.938	11.104	13.084	12.134	10.894		590.476	13.712	12.807	11.184	8.089	9.342	10.891	10.508
592.381	15.784	12.096	12.647	8.026	11.392	12.372	11.147	10.057	10.915	10.339	26.161	22.548	11.694	13.876	16.556	13.705	11.688	13.964	12.695	12.178	19.984	10.148	15.18	11.674	18.657	10.041	16.353	11.19	11.026	34.821	22.641	19.916	17.007	11.725	13.386	11.31	10.993	13.771	13.244	10.765		592.381	13.541	11.925	11.876	7.643	9.648	10.935	10.947
594.286	15.961	13.521	14.319	7.762	11.649	12.152	11.095	10.248	11.235	9.073	26.262	22.187	11.541	14.103	16.835	13.763	12.193	13.09	13.144	12.154	18.992	10.341	15.171	10.835	19.097	9.76	16.021	11.645	10.094	37.518	21.164	19.755	15.601	11.181	12.956	10.476	10.401	13.012	14.035	10.061		594.286	13.475	13.061	12.147	7.804	9.42	10.761	11.751
596.19	15.655	15.562	15.207	6.768	11.554	12.814	10.488	9.589	11.211	9.755	21.155	20.74	10.937	13.262	16.128	13.376	12.545	12.275	13.204	12.542	19.218	10.504	15.505	9.974	19.903	9.711	17.23	11.6	10.06	37.821	22.125	20.413	15.185	11.163	12.813	10.641	9.867	12.524	13.697	10.804		596.19	13.339	13.668	12.134	7.152	9.233	11.753	11.032
598.095	14.134	15.05	14.603	7.232	10.932	12.346	10.194	8.943	10.746	9.516	18.952	19.676	9.973	13.221	14.909	12.41	12.47	11.784	12.305	12.43	20.028	9.622	16.964	9.413	21.411	10.198	17.519	11.04	10.579	34.286	21.445	21.189	15.195	12.994	14.151	10.862	9.971	12.723	12.741	10.698		598.095	13.342	13.132	12.161	7	9.306	12.587	10.688
600	14.453	13.639	14.138	7.331	10.581	12.775	10.777	9.532	10.695	9.177	19.804	20.836	9.946	13.434	14.3	13.728	12.45	11.419	12.461	12.21	20.089	9.104	15.333	9.735	25.034	9.669	17.187	11.575	10.557	34.089	20.312	21.133	15.077	14.812	14.94	10.938	10.538	12.982	12.711	10.397		600	13.16	12.675	11.475	7.696	8.679	11.822	10.81
601.905	15.578	13.352	12.853	6.662	11.345	13.476	10.313	9.681	11.052	10.307	22.667	21.909	10.802	13.476	13.979	15.162	12.223	11.497	12.551	12.182	19.625	10.215	13.622	9.735	26.731	9.893	16.93	12.105	10.455	34.107	21.422	21.427	15.775	14.356	14.598	10.379	10.495	13.789	13.179	11.201		601.905	13.202	13.229	11.631	7.982	8.316	10.652	10.286
603.81	15.397	12.932	13.422	7.166	12.831	12.463	10.578	9.752	12.174	10.12	23.792	22.146	11.117	13.986	13.412	15.734	12.054	11.509	12.084	12.266	19.81	10.356	13.135	9.204	25.794	10.306	16.722	12.005	10.911	33.821	21.992	20.531	16.03	14.925	14.474	10.034	10.778	13.416	13.03	11.022		603.81	13.323	13.714	11.857	8.161	9.093	11.089	10.656
605.714	14.823	12.813	14.724	7.331	14.345	12.459	11.161	9.475	12.131	9.698	21.708	22.68	10.847	14.083	14.255	14.965	12.426	10.982	12.677	12.491	19.71	10.437	13.216	9.622	26.189	10.496	17.027	12.395	11.289	35.875	20.812	19.741	16.252	14.475	13.976	11.124	11.24	13.096	13.199	10.972		605.714	13.335	12.789	12.083	8.116	8.927	11.53	10.979
607.619	14.543	15.297	14.328	7.795	14.176	13.143	10.872	9.674	11.441	9.745	19.833	22.868	10.405	13.552	14.893	13.514	12.094	10.91	12.569	12.416	19.403	9.881	13.856	9.748	24.834	10.736	17.278	11.905	10.677	34.625	21.039	20.531	16.426	13.012	13.789	11.738	11.09	13.066	12.771	11.056		607.619	13.381	12.289	12.263	7.438	8.813	11.344	11.042
609.524	17.267	15.525	14.353	7.894	13.946	12.303	10.569	10.447	11.568	9.688	19.512	22.521	10.568	13.131	14.23	13.116	11.327	11.371	11.581	13.224	19.976	8.578	13.324	8.961	22.817	9.934	17.69	11.32	11.362	34.464	21.117	21.182	16.279	13.55	13.614	11.166	10.606	13.337	12.667	11.19		609.524	13.374	12.729	11.986	6.973	9.098	10.923	11.063
611.429	18.97	13.114	14.25	7.616	14.324	12.16	10.687	10.071	11.446	9.688	21.446	22.411	10.946	13.531	14.905	14.237	11.421	12.21	11.395	12.967	19.94	9.244	13.225	9.07	22.423	10.413	17.412	12.155	11.736	36.625	20.398	21.566	16.695	13.488	13.972	10.869	10.344	13.892	13.567	11.296		611.429	13.755	12.296	11.392	7.366	9.031	10.656	10.582
613.333	17.345	12.858	14.681	8.172	13.865	13.169	10.948	9.908	10.803	10.354	23.417	23.256	10.775	13.538	15.037	14.832	12.094	13.216	11.874	12.463	20.298	10.437	14.243	10.643	22.183	10.686	16.775	12.69	11.196	36.339	22.195	21.664	17.45	12.906	14.677	11.097	11.018	13.295	13.761	11.128		613.333	14.482	12.1	12.281	8.027	9.528	10.721	10.042
615.238	17.634	13.466	15.371	7.788	13.858	13.329	11.095	10.482	11.315	10.323	23.357	23.297	11.432	13.531	14.115	13.37	12.064	13.563	12.389	13.056	20.706	10.681	13.847	12.583	21.926	9.967	16.888	12.6	10.889	34.536	22.133	20.727	17.319	12.769	14.49	10.772	11.115	13.102	13.627	11.034		615.238	13.84	12.604	12.7	8.759	9.617	9.947	10.857
617.143	17.254	16.397	15.009	8.02	13.074	12.983	10.687	11.071	11.723	9.766	24.798	23.196	11.739	13.145	14.049	12.734	11.703	14.251	12.323	13.238	20.569	10.407	12.595	12.483	22.069	9.959	16.893	13.235	10.43	35.304	21.562	21.168	16.956	12.188	14.705	10.283	10.699	13.548	13.597	10.978		617.143	13.307	13.336	12.442	8.357	9.264	10.336	11.471
619.048	15.603	16.256	14.103	8.47	11.885	12.714	9.739	10.823	11.479	10.099	24.452	23.74	10.811	12.579	13.453	13.647	12.149	13.569	10.97	12.958	19.742	10.415	12.658	11.23	21.023	10.504	17.492	13.02	11.034	35.268	22.273	21.853	16.587	11.556	14.681	10.834	10.573	13.205	13.836	11.101		619.048	13.222	13.114	12.922	7.58	9.047	11.352	10.339
620.952	14.763	13.183	14.293	8.351	11.628	12.134	10.493	10.355	11.615	10.771	22.899	22.767	10.126	12.697	13.021	13.988	12.624	11.389	10.832	12.79	19.552	11.244	13.063	10.93	19.606	10.752	17.348	12.095	11.17	33.036	21.484	21.378	16.211	11.262	13.681	10.738	10.405	12.735	13.701	11.034		620.952	12.911	12.271	12.696	6.938	9.575	11.372	10.138
622.857	15.284	12.995	14.845	7.848	11.169	12.208	11.043	10.674	11.291	10.635	23.119	22.037	9.595	12.897	13.461	13.728	12.723	10.707	11.293	12.682	19.653	10.644	12.721	10.783	18.806	10.322	16.305	11.93	10.613	34.125	21.258	21.371	15.883	10.462	13.311	10.648	10.401	12.349	13.502	11.19		622.857	12.856	12.814	12.889	7.321	9.565	11.077	10.921
624.762	16.004	13.776	14.147	7.801	10.628	12.922	10.412	9.957	11.211	10.021	22.774	22.237	9.64	14.193	13.539	14.566	12.465	10.713	11.012	13.145	20	9.6	13.622	11.083	17.686	10.603	16.139	12.415	11.23	36.161	22.078	20.196	15.332	10.856	13.673	11.159	10.652	13.169	13.592	10.888		624.762	13.296	13.375	13.037	7.902	9.321	11.206	10.831
626.667	15.263	15.712	14.181	8.013	10.824	13.411	11.133	9.652	11.23	9.771	22.006	22.023	10.658	14.883	13.568	15.289	12.337	11.581	10.898	13.804	19.907	9.43	14.189	10.678	16.829	10.678	16.032	12.495	11.204	36.339	22.562	19.839	15.671	11.675	13.506	10.11	10.939	13.723	13.388	10.374		626.667	13.479	13.557	12.488	8.036	9.249	11.425	11.392
628.571	14.435	15.726	14.216	8.073	11.527	12.974	11.545	10.099	11.324	9.875	21.185	21.438	11.027	13.745	13.296	14.555	12.287	12.844	10.826	12.551	19.605	10.222	13.225	10.33	17.446	10.388	16.102	11.535	10.638	36.054	21.953	20.497	16.047	12	13.466	9.738	10.753	13.639	12.98	10.587		628.571	13.389	13.925	12.184	8.634	9.373	11.069	12.513
630.476	14.78	13.822	13.422	9.623	12.297	12.667	10.673	10.716	11.291	10.318	21.315	21.63	10.973	12.855	13.477	13.191	12.059	13.048	10.892	11.93	19.512	10.467	12.505	9.787	17.463	10.438	16.38	11.72	10.677	34.464	21.594	20.091	16.413	11.281	13.717	9.841	10.269	13.849	13.129	10.095		630.476	13.564	13.211	12.677	8.616	9.71	11.186	12.476
632.381	15.224	13.091	13.259	11.715	12.527	13.091	10.763	10.255	11.357	9.427	22.804	21.973	11.505	12.428	15.819	12.647	12.079	13.437	10.593	12.472	19.379	9.874	12.55	9.404	17.48	10.826	17.123	11.21	10.596	33.268	21.43	19.895	16.725	11.194	13.625	9.862	10.509	13.361	13.254	10.207		632.381	13.747	12.632	12.82	8.607	9.202	11.138	11.857
634.286	15.431	12.694	14	12.483	12.689	12.996	11.066	9.376	11.502	8.542	22.976	23.164	10.703	12.297	16.675	12.751	12.282	13.665	10.539	12.607	19.972	10.163	13.459	9.591	17.491	9.95	18.091	11.02	10.681	35.571	20.242	20.343	15.977	11.825	13.434	10.152	11.158	12.759	12.443	10.285		634.286	13.969	13.196	12.06	8.223	9.637	11.065	11.354
636.19	15.401	12.804	13.353	12.728	11.797	12.485	10.668	9.787	11.319	9.182	22.381	23.479	10.018	12.924	15.502	12.312	12.787	12.784	10.97	12.43	19.492	10.326	14.189	9.961	17.623	9.744	17.294	11.305	10.847	36.768	20.516	20.664	15.57	11.694	12.765	10.166	11.082	12.693	12.806	10.335		636.19	14.237	13.343	11.668	8.018	10.026	11.453	11.524
638.095	15.5	13.132	13.517	13.828	12.338	12.104	10.924	10.39	11.427	9.438	22.929	22.055	10.577	13.738	16.695	11.902	12.228	12.796	11.413	12.977	19.488	10.444	14.991	10.657	17.423	10.777	16.615	11.405	10.579	36.5	21.656	20.154	16.013	11.5	12.833	10.952	10.685	13.12	13.254	11.095		638.095	14.72	13.243	12.226	8.223	9.642	11.87	11.704
640	17.716	14.922	13.948	14.258	13.399	12.108	11.588	10.085	11.728	9.667	23.232	22.142	11.351	14.566	16.897	11.486	11.173	13.611	11.383	13.444	19.569	10.296	14.766	11.096	16.337	10.711	16.647	12.085	10.498	36.446	21.742	19.846	15.987	11.969	12.996	11.434	10.713	14.265	13.348	11.358		640	13.829	12.586	12.092	8.393	9.415	11.445	11.402
641.905	19.013	16.055	13.784	13.709	12.824	12.173	11.498	9.688	11.761	11.005	23.905	21.904	11.667	14.993	15.527	11.948	11.109	13.06	10.904	13.037	19.335	10.452	13.811	12.596	17.629	10.587	17.294	12.855	11.447	36.25	21.578	20.084	16.433	13.637	12.586	11.324	11.688	14.596	13.224	11.419		641.905	12.805	11.754	11.76	8.036	8.99	10.903	11.063
643.81	18.194	14.731	14.397	13.152	12.047	11.684	10.645	10.043	10.69	10.818	25.089	20.521	11.216	15.172	15.041	12.763	11.886	12.263	10.725	12.752	19.419	10.993	14.649	12.617	18.354	10.281	17.722	12.875	11.553	36.607	21.336	19.378	16.654	14.656	12.88	11.055	12.014	13.06	12.527	10.626		643.81	12.728	12.736	11.065	7.821	8.834	10.794	10.587
645.714	17.522	12.963	15.414	12.748	11.507	11.615	10.308	9.823	10.46	10.495	24.911	19.53	10.315	14.986	14.716	12.584	12.213	12.072	12.192	12.995	19.702	10.57	14.369	11.457	17.84	10.19	17.07	12.57	10.698	35.643	21.195	19.573	16.299	14.819	13.49	10.834	11.115	12.825	13	9.771		645.714	13.179	13.218	11.922	8.107	8.782	11.126	10.286
647.619	16.733	12.438	15.828	13.298	11.615	12.061	10.583	9.106	10.939	10.797	24.131	19.831	10.027	13.793	16.519	13.012	11.733	11.988	14.03	12.57	20.617	9.719	13.757	11.996	17.051	10.19	17.305	12.285	10.464	36.589	21.391	20.091	16.54	14.719	13.474	10.924	10.645	12.602	13.622	10.011		647.619	13.23	12.536	12.829	7.821	9.207	10.879	10.714
649.524	16.151	13.374	14.353	13.51	12.892	13.307	10.858	9.801	11.005	9.932	23.208	22.306	10.423	12.821	17.605	14.601	12.421	11.731	14.174	12.435	20.242	10.296	14.369	12.417	17.04	10.983	17.722	11.82	10.821	36.357	20.484	20.462	16.47	14.312	12.546	11.103	10.806	12.584	13.438	10.291		649.524	13.132	12.961	12.12	7.241	10.052	10.453	10.429
651.429	15.638	15.05	13.75	13.649	14.358	13.13	11.109	10.213	11.136	9.411	20.851	23.397	10.586	12.945	16.852	15.145	12.535	11.988	14.335	12.589	19.282	10.985	14.532	11.996	17.8	11.298	17.209	11.98	11.6	33.321	21.047	20.965	16.913	13.663	12.375	10.621	10.867	12.928	13.189	10.341		651.429	13.327	13.482	12.212	7.357	10.041	10.551	10.698
653.333	15.134	15.612	13.853	14.901	14.399	12.654	10.891	9.163	11.451	9.292	21.53	20.498	10.189	13.71	16.942	15.04	11.975	12.743	14.305	12.785	20.036	10.356	14.766	11.187	17.731	10.421	17.139	11.955	11.26	33.536	22.266	20.301	16.497	13.381	12.737	10.91	10.599	13.048	13.06	10.223		653.333	13.428	13.729	11.797	7.304	9.834	10.47	11.508
655.238	14.707	14.096	14.207	15.258	13.899	12.407	10.398	8.908	11.469	8.839	23.131	17.676	10.108	13.641	15.872	14.434	12.436	12.838	13.395	12.458	20.589	9.674	15.396	10.961	18.429	9.793	17.326	12.505	10.77	48.196	21.555	20.573	15.46	14.031	12.594	11.772	10.609	13.078	13.025	9.581		655.238	13.654	12.525	11.562	7.473	9.316	10.607	10.862
657.143	14.672	13.539	14.733	15.556	13.973	11.719	10.398	9.128	11.333	9.089	21.304	17.986	10.171	13.531	14.7	13.647	12.495	14.072	12.569	12.121	19.44	10.081	14.297	10.917	18.571	9.653	17.572	11.88	11.047	62.286	21.008	20.448	16.403	14.225	12.637	12.069	10.699	12.494	13.299	9.765		657.143	13.805	11.868	11.659	8.17	9.052	10.466	10.339
659.048	14.552	13.539	14.629	17.146	14.284	12.9	10.844	9.709	11.709	9.719	20.518	20.991	10.712	14.041	14.786	14.168	11.861	15.132	13.03	12.678	19.516	10.504	14.315	10.735	17.503	9.653	17.048	11.15	10.83	61.607	21.031	19.608	16.668	13.675	12.426	11.097	10.832	12.566	12.965	10.006		659.048	13.973	11.793	11.724	8.036	9.228	10.283	10.497
660.952	15.06	12.598	14.871	17.099	13.973	12.636	10.351	10.092	11.263	9.906	24.101	20.753	11.964	14.524	15.947	14.324	11.436	14.09	13.743	12.234	20.589	10.089	15.667	10.696	16.777	10.231	16.61	11.215	11.191	53	21.43	19.594	16.896	13.6	12.367	10.407	10.781	12.657	12.189	9.961		660.952	13.809	12.346	11.544	7.643	9.679	10.287	10.788
662.857	15.112	12.155	14.241	14.841	12.953	11.688	9.962	9.936	10.385	11.083	24.089	18.187	11.252	14.207	17.14	14.035	11.807	12.91	12.88	12.131	20.391	9.393	16.829	11.987	16.651	10.893	17.064	10.98	11.294	45.768	20.523	19.867	16.695	14.494	12.02	10.869	10.093	12.976	12.308	10.503		662.857	13.233	13.721	12.055	7.58	10.44	10.858	11.317
664.762	14.841	12.963	13.534	14.265	13.203	11.861	10.303	10.461	10.559	10.979	20.101	17.009	10.676	13.11	16.49	14.462	12.025	12.904	11.749	12.537	20.089	9.356	16.613	12.974	17.006	10.57	17.326	11.03	11.643	46.089	20.398	20.238	16.067	14.988	12.375	10.6	10.444	13.404	13.114	10.693		664.762	13.066	13.171	12.336	7.821	9.969	11.538	11.46
666.667	15.379	15.237	13.422	14.344	14.149	11.883	10.156	10.234	10.671	9.479	19.548	15.402	11.432	13.041	15.671	14.601	11.574	12.754	11	12.131	19.677	9.415	14.324	11.535	16.6	9.851	17.417	10.455	12.685	42.571	20.734	20.86	15.936	14.125	13.239	11.269	11.19	12.753	12.861	11.084		666.667	13.685	12.721	11.76	8.107	9.145	11.154	11.021
668.571	17.172	15.612	15.043	13.682	13.797	11.636	10.237	8.929	10.944	9.474	20.333	14.863	11.333	13.848	14.996	13.769	11.248	12.06	11.557	11.995	18.968	9.526	13.477	10.448	15.629	9.537	17.289	10.62	12.217	38.464	20.805	21.182	16.252	12.712	12.785	11.752	10.591	12.139	12.393	10.899		668.571	13.412	12.75	11.696	7.607	9.777	10.409	10.54
670.476	17.754	13.598	15.647	13.272	12.676	12.022	10.673	8.511	11.394	10.922	21.863	15.571	11.018	13.986	14.004	13.561	11.223	11.796	11.994	12.037	19.552	10.748	15.108	10.652	16.149	9.926	17.572	11.125	11.349	36.196	21.289	19.853	16.95	11.825	12.044	10.669	10.186	12.41	13.448	10.363		670.476	13.167	12.85	12.226	7.866	9.917	11.308	10.905
672.381	18.095	12.653	13.526	13.629	11.527	12.346	10.256	9.738	10.991	11.422	23.94	16.269	11.072	13.014	13.691	14.497	11.718	12.677	11.707	12.458	19.694	11.763	14.577	11.909	18.731	10.669	17.203	11.08	11.374	41	21.539	19.727	16.668	12.156	12.1	10.821	10.631	12.88	13.443	10.905		672.381	13.37	12.518	12.599	8.321	9.637	11.599	10.847
674.286	18.72	13.315	13.44	13.371	11.514	12.433	10.294	10.319	10.793	10.484	22.208	19.311	10.604	12.834	13.502	14.584	11.95	12.856	11.467	12.949	18.895	10.37	13.207	11.748	18.6	10.917	16.449	11.56	11.396	43.25	22	21.014	16.262	12.175	12.737	11.641	10.599	13.398	12.731	10.475		674.286	13.152	12.954	12.332	7.982	9.585	10.769	11.206
676.19	17.513	15.078	13.345	12.974	12.264	12.134	10.583	9.78	11.404	9.771	19.333	20.872	10.351	13.683	13.609	14.364	12.802	12.066	11.263	12.752	19.315	8.956	13.631	10.161	16.554	10.099	16.193	11.425	10.698	36.357	22.148	20.706	15.93	11.688	12.936	10.566	9.849	13.205	12.682	10.128		676.19	13.603	13.329	12.562	7.839	9.611	10.955	11.413
678.095	16.371	15.078	13.155	12.265	12.216	11.97	10.758	9.191	12.146	9.766	18.833	19.534	10.568	13.738	13.84	13.919	12.193	12.976	11.138	12.505	20.105	9.83	13.766	9.965	16.331	9.669	16.599	10.75	10.94	34.821	21.68	19.783	16.248	11.663	12.857	10.628	10.509	13.271	13.075	11.112		678.095	13.903	12.943	12.419	7.652	9.969	10.749	11.476
680	15.603	13.525	13.241	11.649	11.851	12.303	11.005	9.035	11.385	9.802	17.44	19.324	10.892	13.414	13.095	13.428	10.861	13.737	10.174	12.318	19.258	9.756	14.775	9.313	16.194	10.182	16.717	11.235	11.336	35.161	21.125	19.622	16.554	10.688	13.39	11.152	11.824	13.614	12.831	11.363		680	13.226	12.821	11.876	7.857	9.746	10.206	11.143
681.905	15.418	13.667	13.379	12.47	11.128	12.39	11.005	10	10.615	9.693	15.22	18.539	11.514	13.131	12.864	12.526	11.624	14.078	10.03	12.883	19.141	9.126	15.234	9.278	17.103	10.901	16.289	12.12	11.038	36.196	21.969	19.762	16.037	10.512	13.805	10.876	12.828	13.235	12.254	10.793		681.905	12.774	12.55	12.24	7.875	9.829	10.049	10.794
683.81	15.47	13.411	14.888	12.775	10.432	12.238	11.052	9.943	10.69	10.333	15.595	17.726	11.126	13.614	14.033	12.006	11.985	15.144	10.605	12.949	20.214	9.644	14.685	9.774	16.954	10.603	16.738	12.66	11.66	37.286	21.633	20.336	15.701	12.219	13.618	12.703	13.667	13.337	12.552	10.682		683.81	12.848	12.864	12.59	7.759	9.933	10.579	10.714
685.714	15.181	13.352	14.595	12.358	10.73	12.143	11.645	9.461	10.516	10.286	18.44	17.507	10	13.807	14.296	11.832	12.208	15.216	11.353	12.785	19.625	10.148	14.351	10.065	16.429	10.975	17.342	12.515	11.609	35.625	21.445	20.79	16.295	12.475	12.323	14.228	13.677	12.91	12.801	10.603		685.714	13.315	12.771	12.415	7.259	9.72	11.753	10.651
687.619	15.655	16.096	13.25	11.265	11.041	12.152	11.341	9.333	10.822	10.307	20.851	17.575	11.261	13.503	13.531	11.491	12.074	14.629	11.605	13.271	19.306	10.43	15.757	12.535	16.954	11.033	17.444	11.925	11.196	34.946	22.484	20.664	16.671	11.363	12.446	13.448	12.717	12.313	13.368	10.587		687.619	13.615	12.45	12.724	7.277	9.85	11.555	10.778
689.524	16.151	16.594	13.457	10.98	10.73	12.307	10.744	9.589	10.484	11.094	20.72	18.808	11.622	13.331	12.576	12.006	11.856	14.419	11.323	13.617	19.56	11.696	15.054	13.583	17.651	10.091	17.743	11.74	11.272	35.107	21.867	20.105	16.899	11.406	13.378	13.703	12.025	12.639	13.498	10.989		689.524	13.206	12.618	12.166	8.045	9.43	11.235	11.016
691.429	15.125	14.014	14.793	11.589	11.716	12.567	10.919	9.348	10.84	9.943	18.946	18.945	11.297	12.69	12.716	12.254	11.911	13.395	11.377	13.154	19.617	11.385	14.027	11.943	18.309	10.595	17.626	11.495	11.404	34.089	21.156	20.182	16.617	12.569	13.072	14.483	11.882	12.97	13.239	11.38		691.429	13.502	12.418	12.005	8.223	9.528	10.984	11.217
693.333	14.716	13.566	13.534	11.53	12.554	12.532	11.194	9.603	11.906	9.318	17.673	18.397	11.198	12.048	13.362	12.694	11.604	12.407	11.467	12.748	19.105	10.089	15.171	11.074	17.651	10.669	16.449	11.27	11.604	35.107	21.742	20.972	16.305	11.587	12.546	13.793	12.254	12.669	13.507	10.827		693.333	13.471	12.875	12.7	7.857	10.425	10.664	10.312
695.238	15.009	13.658	12.319	11.457	13.973	12.42	10.991	9.752	11.507	10.094	16.774	18.416	10.649	13.083	13.728	14.104	11.743	13.192	11.94	12.393	18.512	10.504	15.694	10.874	16.949	9.942	15.176	11.57	10.57	42.946	22.609	19.986	16.523	10.931	11.88	14.483	12.588	12.663	12.587	10.447		695.238	13.342	13.179	11.857	6.973	9.995	10.947	10.619
697.143	15.483	13.228	13.25	10.311	14.797	11.662	10.682	8.922	11.113	10.953	16.494	19.087	10.631	13.379	13.864	14.798	11.485	13.653	13.138	12.696	19.181	11.133	14.955	10.722	17.44	9.818	15.802	11.375	9.804	41.482	22.445	19.196	16.98	11.119	12.351	13.917	11.513	12.753	12.08	10.821		697.143	13.296	12.386	11.387	7.554	9.793	10.777	12.069
699.048	15.681	12.922	13.69	10.417	14.115	11.364	10.929	9.241	11.972	11.354	16.31	20.731	10.991	12.641	13.815	15.069	11.223	13.251	13.659	13.734	19.875	10.533	15.252	10.891	18.04	9.421	16.519	10.935	10.906	37.839	21.516	19.972	16.782	10.556	12.857	12.848	11.086	12.62	12.99	10.894		699.048	12.576	12.321	11.562	8.518	10.233	10.7	11.836
700.952	14.823	14.735	13.974	10.689	14.547	12.186	10.924	9.986	12.347	10.854	17.268	20.858	11.586	13.552	13.786	14.948	11.678	13.335	14.257	13.463	19.323	11.007	15.153	11.196	17.68	9.446	16.701	10.835	11.668	42.429	21.641	19.573	16.419	10.831	13.761	12.048	10.939	12.193	13.259	10.547		700.952	12.907	12.25	11.581	7.643	10.228	10.927	10.704
702.857	14.935	15.635	13.509	9.238	15.088	13.048	10.834	9.908	11.418	11.672	18.476	19.781	11.703	13.152	13.523	14.983	11.767	13.335	13.862	13.023	19.492	11.593	13.928	11.009	16.68	10.174	16.364	10.925	11.379	47.339	21.016	19.58	16.715	11.306	13.817	11.683	10.498	11.705	13.463	10.101		702.857	13.37	11.661	11.659	7.562	9.642	11.057	10.212
704.762	15.323	13.904	13.586	9.722	15.007	12.996	10.171	9.766	10.962	11.266	19.929	19.662	11.297	12.538	13.753	14.642	11.594	13.084	13.084	13.15	20.367	10.919	13.523	10.248	16.6	9.81	15.62	11.27	11.153	63.464	20.297	20.434	16.305	11.394	13.068	11.448	9.903	12.627	13.154	10.05		704.762	13.965	12.421	11.558	7.848	9.477	10.518	10.021
706.667	15.159	12.968	13.552	10.053	14.02	12.216	9.597	9.092	10.498	10.229	22.125	17.726	10.243	12.731	13.675	13.179	11.535	12.545	13.323	12.921	19.327	10.052	13.658	10.357	16.509	10.066	16.021	10.54	11.511	72.768	20.703	20.811	16.067	10.913	12.813	10.166	9.427	12.669	12.896	10.324		706.667	13.774	13.279	11.687	7.393	9.699	10.555	10.053
708.571	14.491	12.89	13.94	9.152	12.892	12.061	9.976	9.135	10.16	9.781	20.887	15.324	10.423	13.021	13.292	13.133	11.827	12.251	12.192	12.832	19.306	9.763	14.144	10.557	16.109	10.446	16.578	10.2	11.111	57.964	21.305	20.86	16.406	10.738	12.578	10.11	9.613	12.608	12.94	10.279		708.571	13.07	13.171	11.309	7.339	9.482	10.3	10.704
710.476	14.332	15.169	14.155	8.848	12.547	11.996	10.938	9.965	11.277	9.005	19.101	14.927	10.982	13.607	13.07	13.283	12.347	12.611	11.79	12.435	20.101	9.867	14.225	11.274	15.851	9.868	15.968	10.435	10.86	41.482	20.5	20.573	16.027	10.044	12.729	9.71	9.573	12.675	12.721	9.911		710.476	13.805	12.864	11.857	8.42	9.943	10.126	11.598
712.381	16.909	15.566	14.129	9.04	12.709	12.264	11.18	9.823	11.986	9.401	17.464	14.53	10.477	12.6	13.189	12.439	12.218	12.749	12.102	11.579	19.657	10.704	14.18	12.461	15.823	9.793	15.396	9.55	11.413	42.036	20.539	19.783	15.54	10.231	12.873	9.566	9.351	12.38	12.378	10.073		712.381	14.14	12.679	12.203	8.58	9.585	10.547	11.799
714.286	18.043	13.502	13.802	9.477	12.128	12.554	11.118	9.61	10.761	10.094	15.167	14.872	9.838	11.945	14.074	11.682	12.045	12.922	11.922	11.439	18.944	10.689	14.009	11.717	16.263	10.562	15.583	10.215	11.323	46.964	20.578	18.783	15.067	11.113	12.386	10.586	8.62	12.825	12.721	9.866		714.286	13.327	12.639	12.332	8.429	8.959	10.32	11.037
716.19	17.306	13.05	12.853	9.808	11.284	11.974	10.815	9.56	10.615	9.339	14.685	15.781	9.721	13.214	15.996	11.555	11.782	12.599	12.299	11.874	18.274	9.356	14.541	10.148	16.389	10.298	15.487	11.63	11.404	41.518	20.531	19.545	16.111	11.444	12.741	11.076	9.072	12.789	12.96	9.883		716.19	12.732	12.693	12.189	7.589	9.259	10.453	10.143
718.095	17.401	12.945	13.328	9.252	11.568	12.273	10.427	9.816	11.446	8.885	14.732	15.078	9.766	14.662	16.712	12.214	11.223	11.904	12.898	12.444	19.165	9.163	14.838	10.965	16.846	9.504	15.829	11.515	11.749	37.054	21.5	19.86	17.641	13.825	13.876	10.855	9.928	12.596	12.318	9.821		718.095	13.28	12.486	12.046	6.946	9.166	10.931	10.185
720	17.349	13.854	13.345	9.079	11.466	12.762	10.493	9.723	11.207	9.698	14.31	14.466	10.333	13.29	17.045	12.659	11.505	12.407	13.222	13.407	19.508	9.393	14.748	11.822	16.949	10.446	15.963	11.73	12.081	41.089	22.039	19.783	17.52	15.425	13.988	11.145	9.889	12.102	12.244	10.263		720	13.844	12.707	12.433	7.571	9.43	11.198	10.64
[truncated: 33 more columns]

## Sheet: Figure 1E&S1C 1uM Chronic 2
	Baseline																																															Following dopamine exposure
Seconds	ROI 1	ROI 2	ROI 3	ROI 4	ROI 5	ROI 6	ROI 7	ROI 8	ROI 9	ROI 10	ROI 11	ROI 12	ROI 13	ROI 14	ROI 15	ROI 16	ROI 17	ROI 18	ROI 19	ROI 20	ROI 21	ROI 22	ROI 23	ROI 24	ROI 25	ROI 26	ROI 27	ROI 28	ROI 29	ROI 30	ROI 31	ROI 32	ROI 33	ROI 34	ROI 35	ROI 36	ROI 37	ROI 38	ROI 39	ROI 40	ROI 41	ROI 42	ROI 43			Seconds	ROI 1	ROI 2	ROI 3
1.90476	8.934	8.942	13.189	14.179	8.242	14.789	16.84	13.771	14.146	24.837	13.784	14.951	9.237	10.551	14.584	16.159	19.482	14.987	17.081	13.544	14.497	14.682	13.481	19.557	24.875	9.197	30.538	21.628	15.702	13.384	29.73	17.524	18.615	16.891	19.31	19.303	15.284	24.945	20.151	13.494	12.154	11.609	8.93			1.90476	7.331	10.938	21.384
3.80952	8.662	9.409	13.389	13.75	8.018	13.935	16.909	12.941	15.793	25.967	14.688	15.166	8.953	10.576	14.095	15.366	18.965	14.371	17.216	14.149	15.057	15.818	13.795	18.747	23.591	10.893	22.828	20.33	15.737	13.241	29	17.39	17.479	17.168	19.664	20.014	15.608	25.544	20.966	13.512	11.842	11.304	9.102			3.80952	6.823	10.327	21.399
5.71429	8.623	9.942	13.482	13.405	7.704	14.772	16.84	11.812	15.427	24.446	13.97	15.497	9.318	9.827	13.971	15.785	18.388	13.661	18.209	14.728	14.855	15.855	13.051	18.259	24.511	11.246	22.161	19.787	14.877	13.102	28.674	17.008	19.219	17.321	19.454	20.071	14.527	25.585	20.857	13.625	11.816	11.174	8.93			5.71429	6.952	10.5	18.945
7.61905	9.061	9.248	14.007	14.226	7.516	14.545	16.983	13.235	14.683	24.435	13.497	15.712	9.251	9.374	14.292	16.037	17.612	13.923	18.27	15.053	14.83	15.773	12.865	19.247	26.557	10.311	28.161	21.84	14.789	12.646	27.865	17.084	20.062	17.467	18.834	19.327	15.824	25.171	20.933	12.899	11.879	11.353	8.261			7.61905	7.204	10.833	17.21
9.52381	9.149	9.321	13.939	16.524	7.386	14	17.063	13.359	14.622	27.196	13.02	15.337	8.839	9.646	14.015	15.821	16.6	14.224	18.993	13.939	15.723	16.745	13.346	19.747	24.705	10.344	29.957	22.394	12.982	13.32	28.854	17.123	19.979	17.533	18.668	19.782	15.73	25.189	22.597	12.536	11.702	12.011	8.389			9.52381	7.53	10.747	15.897
11.4286	8.899	9.956	13.832	16.464	7.726	13.699	16.051	12.876	15.122	28.315	12.95	15.184	8.716	10.358	14.657	15.801	17.565	13.987	18.669	12.781	16.553	15.818	13.75	19.487	24.307	9.713	23.849	20.84	13.211	12.84	29.258	16.61	20.479	17.431	19.007	19.218	14.608	25.493	23.95	12.75	11.493	12.027	8.962			11.4286	7.741	10.969	15.477
13.3333	8.86	9.307	13.679	14.369	7.917	14.707	16.366	12.371	15.402	26.989	12.814	15.736	8.82	10.029	14.978	16.179	19.329	14.035	17.777	13.281	15.899	15.127	14.115	19.184	24.966	10.148	21.161	21.564	15.421	12.687	28.944	16.655	19.062	16.781	19.214	19.014	15.054	25.207	21.538	12.637	11.75	11.598	9.236			13.3333	7.353	11.179	14.506
15.2381	9.096	9.197	13.029	15.024	7.599	14.959	16.583	12.706	15.28	26.185	12.583	15.718	8.891	9.885	14.197	16.455	19.012	13.971	18.02	13.86	15.943	16.618	14.224	20.222	24.375	10.41	22.957	21.926	16.158	13.065	28.831	17.217	18.854	17.62	19.535	19.972	15.162	25.438	19.924	12.929	11.827	12.022	9.382			15.2381	7.091	12.759	13.947
17.1429	9.088	8.993	13.568	16.238	7.747	14.61	16.594	13.647	16	27.565	13.035	15.693	8.787	10.802	14.555	16.541	18.047	13.735	18.108	13.956	15.742	17.673	13.897	20.101	24.545	10.557	23	20.713	15.632	13.367	29.573	17.326	19.49	18.27	18.72	19.555	15.135	26.618	20.798	13.321	12.169	11.31	8.803			17.1429	7.468	19.062	13.881
19.0476	8.921	9.533	13.936	16.298	7.726	13.756	16.6	13.329	15.756	27.5	13.839	15.184	9.038	10.44	14.54	16.224	18.706	14.348	18.419	13.272	15.597	17.709	13.641	19.089	24.92	9.943	22.032	20.138	14.947	13.483	28.596	16.933	19.167	18.007	17.911	17.801	15.703	25.705	21.361	12.988	12.051	11.043	9.166			19.0476	7.803	24.315	14.394
20.9524	8.294	10.139	13.886	15.19	8.069	13.593	16.417	12.894	14.61	25.989	13.221	14.736	9.398	10.103	14.095	16.724	19.153	14.994	18.27	13	16.082	16.982	13.827	19.158	24.773	10.025	22.022	20.915	14.702	13.354	27.798	17.228	18.542	18.679	18.107	18.156	15.554	23.475	20.269	12.619	11.728	11.918	9.414			20.9524	7.775	21.753	14.902
22.8571	8.285	9.394	13.35	14.452	7.798	14.846	16.897	12.994	15.378	26.543	12.864	15.043	9.412	10.708	14.708	16.858	18.224	14.403	18.345	13.737	15.836	17.064	13.949	19.962	24.659	11.549	21.613	20.255	15.561	13.483	28.719	18.178	19.156	19.277	18.347	19.768	14.905	23.507	20.731	13.054	12.316	12.451	9.439			22.8571	7.4	17.42	14.134
24.7619	9.522	8.869	12.679	14.298	7.635	14.691	16.931	13.353	16.61	26.478	13.588	15.393	9.422	10.272	14.489	16.463	17.588	14.351	18.682	13.412	15.686	17.4	14.872	20.089	24.636	11.443	21.172	21.074	16.211	13.197	28.674	17.73	19.812	18.591	19.181	20.052	15.122	24.41	22.143	14.077	12.246	12.402	9.433			24.7619	7.156	15.494	14.033
26.6667	9.184	8.883	13.521	14.643	8.231	15.154	15.977	13.459	15.744	25.957	13.302	15.558	9.668	10.473	14.803	16.122	17.4	15.492	17.892	12.781	15.214	17.509	14.231	20.348	23.682	10.992	21.505	21.287	16.158	13.653	29.326	17.092	20.583	19.241	19.616	19.185	15.446	24.751	22.168	13.631	12.033	12.174	9.032			26.6667	7.463	15.173	14.057
28.5714	8.504	9.328	14.268	14.798	7.96	15.39	16.909	13.694	15.671	25.935	13.281	15.123	9.791	10.008	15.263	15.74	17.494	15.112	17.392	13.202	15.126	17.6	13.538	19.652	23.727	10.861	22.849	20.096	16.842	13.667	28.697	16.964	21.531	19.467	19.373	18.431	16.149	24.507	21.168	12.72	12.629	12.603	9.382			28.5714	7.811	15.778	13.847
30.4762	8.57	9.409	13.861	14.798	7.736	15.447	18.806	13.724	15.341	27.25	13.548	15.086	9.526	9.354	15.226	16.577	18.659	13.968	17.973	13.667	15.836	17.382	13.84	19.342	24.33	10.656	23.161	21.021	16.895	17.044	27.236	16.758	19.938	18.723	18.849	19.095	16	24.668	20.681	13.274	13.033	11.989	9.624			30.4762	7.902	14.623	14.005
32.381	8.807	9.679	13.557	15.095	8.047	15.431	18.651	13.812	15.573	26.978	13.151	15.393	9.209	9.979	15.109	16.768	19.694	13.534	18.493	13.096	15.855	17.473	13.673	18.873	24.636	10.607	21.634	21.117	17.07	18.048	27.955	16.911	19.385	18.781	18.487	19.692	16.243	24.682	22.395	13.821	12.522	11.636	9.172			32.381	7.916	12.71	14.162
34.2857	8.943	9.737	14.193	14.952	8.238	15.22	17.234	13.676	16	26.87	13.704	15.644	9.64	10.424	15.015	16.321	19.2	14.179	19.054	12.693	15.931	18.545	13.282	18.823	25.614	10.869	21.108	21.734	16.614	13.915	30.888	16.663	19.823	18.81	18.317	19.237	16.486	24.134	22.63	13.768	12.136	12.136	9.019			34.2857	7.806	11.389	14.243
36.1905	8.873	10.336	13.518	15.44	7.863	15.74	16.326	13.612	16.341	25.598	13.382	15.344	9.431	10.259	13.891	16.646	18.482	14.438	18.662	13.298	16.415	18.455	14.032	19.582	26.693	11.189	19.882	22.266	17.158	13.279	31.539	17.031	20.594	19.387	18.97	19.483	16.568	24.189	20.983	13.815	12.294	12.234	10.096			36.1905	7.177	10.568	13.916
38.0952	8.921	9.898	13.218	15.333	7.838	15.374	17.291	14.024	16.024	25.337	13.523	14.939	9.318	10	13.029	17.114	18.835	14.144	18.804	13.491	15.182	18.2	15.256	19.392	25.83	11.287	19.871	21.287	17.351	13.48	30.562	17.217	20.958	18.701	19.07	19.972	15.486	24.304	21.008	13.988	11.963	11.587	9.968			38.0952	7.235	10.66	14.296
40	9.202	9.255	14.093	14.893	8.097	14.48	18.211	14.476	17.268	27.359	13.472	15.626	8.986	10.436	13.591	16.618	18.682	14.422	18.405	13.395	15.553	18.427	14.974	19.063	23.693	10.992	21.839	20.426	16.632	13.187	30.191	16.994	19.427	17.672	18.369	19.081	15.446	24.995	19.992	13.935	11.794	10.707	9.382			40	7.772	11.13	14.895
41.9048	8.89	9.774	14.221	14.262	8.032	14.228	17.543	13.553	18.366	28.13	13.065	15.521	8.972	10.21	13.474	16.374	18.706	13.62	18.351	12.605	15.918	17.673	13.436	19.956	24.057	10.885	21.226	20.234	14.965	13.197	30.921	17.468	18.802	17.65	18.384	18.498	16	25.221	19.134	13.827	11.831	10.918	9.732			41.9048	7.465	10.84	14.745
43.8095	8.689	9.453	13.636	14.024	7.686	14.626	16.697	13.271	15.415	26.804	13.693	15.436	9.422	9.481	13.511	16.837	17.365	13.489	18.635	12.509	14.667	17.336	12.885	21.646	24.443	10.705	20.247	19.5	15.544	13.425	31.809	17.022	19.646	18.518	18.299	19.213	15.378	24.539	19.655	13.554	11.077	11.478	9.318			43.8095	7.285	10.16	14.847
45.7143	8.285	9.161	13.425	14.464	7.599	14.886	16.103	13.553	14.244	26.076	12.99	14.945	9.45	9.51	14.175	16.435	16.671	13.537	17.905	12.588	15.346	16.718	13.526	21.722	24.125	10.82	19.398	19.872	15.737	12.997	29.315	16.507	19.083	19.307	18.594	19.327	14.649	24.046	20.42	13.143	10.941	10.946	8.694			45.7143	7.638	10.222	18.492
47.619	7.781	9.197	13.45	13.726	7.596	14.439	16.114	12.259	14.939	26.467	12.407	14.055	9.024	9.214	14.263	15.589	18.624	13.256	17.284	12.702	15.893	16.6	13.353	20.456	23.227	10.615	19.484	20.106	14.158	12.534	29.326	16.084	18.156	17.971	18.384	18.142	13.703	23.954	20.95	12.821	10.908	10.853	8.713			47.619	7.614	9.704	20.31
49.5238	8.346	9.679	13.329	13.417	7.083	13.862	15.909	12.553	14.707	25.576	12.633	14.423	8.896	8.947	14.197	15.642	17.988	13.342	16.912	13.842	15.132	16.873	13.59	19.835	23.216	10.115	20.559	19.968	14.474	12.252	30.124	15.925	19.469	18.073	17.642	17.829	13.703	23.562	20.681	12.988	10.621	11.364	8.911			49.5238	7.784	9.525	19.048
51.4286	8.364	9.453	13.279	13.56	7.173	14.203	16.371	13.459	14.463	25.543	12.97	14.902	8.664	9.399	14.139	15.484	17.765	13.463	17.811	13.035	14.925	15.773	13.679	19.582	24.966	11.041	20.892	20.319	14.544	12.306	28.506	16.838	21.656	19.292	18.111	18.427	14.608	23.788	20.857	13.083	10.993	11.63	8.465			51.4286	8.139	10.895	20.368
53.3333	8.075	9.19	12.811	13.976	7.35	14.78	16.617	13.724	14.927	24.565	13.588	13.761	8.635	10.132	13.613	15.581	19.435	13.518	17.939	12.421	15.472	16.118	12.801	19.867	24.205	10.959	20.312	19.191	14.123	12.827	27.674	16.847	20.979	18.555	19.103	18.91	15.284	23.562	20.378	13.381	10.993	11.484	8.561			53.3333	7.775	10.673	20.821
55.2381	8.434	9.241	12.889	14.75	7.419	13.919	15.789	12.924	15.22	24.772	12.97	13.871	9.299	10.535	13.715	16.289	19.682	13.086	18.047	12.684	15.484	17.827	12.064	20.342	24.341	10.041	20.032	19.426	13.965	12.966	27.73	16.655	19.5	17.35	19.236	18.924	14.595	24.037	20.378	13.101	11.485	11.033	9.293			55.2381	7.393	9.593	20.279
57.1429	8.86	8.956	13.579	14.036	7.195	12.512	16.12	12.059	15.037	27.076	12.518	14.828	9.123	10.481	14.051	16.093	19.435	13.013	18.601	13.009	14.994	17.7	13.109	20.006	24.761	10.238	34.849	21.064	15.316	12.861	28.067	16.992	19.76	17.555	18.292	19.384	13.905	25	20.37	12.482	11.621	11.098	9.459			57.1429	6.842	9.679	18.778
59.0476	9.228	9.161	13.489	13.702	7.365	13.634	16.549	12.671	15.793	25.815	13.241	15.307	8.9	9.539	13.825	16.386	19.024	13.444	18.054	13.719	14.975	16.355	13.75	19.418	24.42	10.689	35.086	20.691	15.93	12.769	27.191	16.983	19.198	18.861	17.672	20.142	14.892	24.074	19.345	12.935	12.14	11.011	8.777			59.0476	6.818	9.784	16.625
60.9524	8.873	9.803	13.161	13.94	7.899	14.959	17.069	13.588	16.22	23.685	13.734	15.632	9.384	9.247	13.905	15.805	18.659	13.76	17.182	13.596	15.057	16.273	13.622	19.57	25.432	11.361	19.645	20.585	14.86	13.507	28.393	16.76	18.708	19.54	18.125	19.787	15.973	23.525	19.605	13.601	12.007	10.592	8.395			60.9524	7.141	10.179	15.959
62.8571	8.526	10.241	12.875	14.012	7.422	15.057	16.44	13.682	16.841	25.141	14.216	14.933	9.114	9.362	13.54	15.614	18.365	13.125	17.405	12.149	14.811	16.964	13.808	19.095	25.341	10.803	20.591	21.319	14.772	13.789	27.393	16.326	19.344	17.635	18.111	18.445	15.095	24.005	20.361	13.661	10.526	10.391	9.083			62.8571	6.803	10.42	15.01
64.7619	8.846	10.409	12.961	14.667	7.292	14.48	16.286	13.041	15.927	26.62	14.126	15.086	8.735	9.152	13.613	17.321	17.859	13.371	17.216	12.868	14.943	18.291	14.154	18.557	23.864	10.5	22.011	20.085	15.877	13.177	25.427	16.599	19.781	16.241	17.568	17.763	15.811	24.35	21.303	13.232	11.676	10.533	8.866			64.7619	7.223	9.753	14.203
66.6667	8.307	9.657	13.318	14.762	7.773	14.081	16.903	13.741	15.549	26.946	13.251	15.485	8.54	9.432	14.62	17.069	17.553	14.109	17.649	13.289	15.516	16.691	14.115	19.759	24.182	11.967	20.398	20.5	15.246	12.412	27.876	16.772	19.854	17.197	17.889	18.953	16.959	24.29	20.941	12.97	12.379	11.076	8.312			66.6667	7.484	10.543	14.379
68.5714	8.474	9.438	13.279	15.548	8.173	16.187	17.103	13.918	16.293	27.924	13.462	15.89	8.801	9.864	14.686	16.646	19.118	13.93	18.784	11.719	15.811	15.273	13.994	20.291	25.511	11.77	20.925	22.564	14.579	12.806	27.191	16.925	18.99	17.993	18.439	20.047	16.865	25.028	21.361	12.464	11.511	11.603	8.815			68.5714	7.201	11.049	14.866
70.4762	9.575	10.27	13.7	15.381	8.516	16.431	16.491	12.994	16.732	27.337	14.206	15.583	9.128	9.909	14.234	16.772	20.765	13.096	19.034	12.228	16.17	17.173	14.353	20.07	25.25	10.738	22.602	21.83	16.368	13.81	27.169	16.908	19.396	18.204	18.07	19.161	17.054	24.525	21.874	12.774	12.151	11.125	9.401			70.4762	6.902	9.901	14.489
72.381	9.364	10.277	14.446	14.286	8.516	14.715	17.137	12.694	16.537	25.402	14.226	14.81	9.427	10.128	13.993	16.252	20.141	13.121	19.446	12.316	15.956	18.773	14.199	19.373	25.068	10.975	20.613	20.404	15.632	13.66	28.348	17.072	20.812	18.606	18.661	18.995	15.932	23.622	21.487	13.899	12.467	11.391	9.662			72.381	6.923	9.926	14.558
74.2857	9.333	9.825	14.75	15.774	8.877	15.569	18.08	13.435	16.28	26.011	14.387	15.65	9.517	10.202	14.708	15.882	18.659	13.45	19.122	12.237	15.748	19	14.462	20.019	25.443	11.492	20.097	21.553	15.439	13.201	28.427	18.267	21.302	19.372	18.908	19.716	15.946	24.71	22.479	14.423	12.011	12.435	9.662			74.2857	7.235	10.29	18.532
76.1905	9.513	9.533	14.186	16.548	8.787	15.366	17.44	13.494	16.073	26.967	14.035	15.908	8.682	9.42	15.095	15.866	18.706	13.128	18.791	12.789	14.843	18.282	13.538	19.772	25.761	11.18	21.28	21.766	15.544	12.908	28.607	18.162	20.438	18.818	17.908	19.929	16	25.023	21.345	13.905	12.147	12.228	9.299			76.1905	7.233	10.377	21.074
78.0952	9.325	9.234	13.679	15.512	7.982	14.642	17.074	12.788	14.756	27.022	13.719	15.27	8.962	9.486	15.066	16.362	19.718	13.335	18.77	13.202	14.126	17.027	12.923	18.709	25.932	10.156	21.957	21.223	15.035	13.299	27.247	17.565	19.927	19.029	18.424	19.351	14.554	24.834	20.697	13.673	12.809	12.147	9.35			78.0952	7.592	10.519	19.508
80	8.961	9.161	13.882	15.286	7.841	15.496	16.68	14.018	14.768	26.467	13.558	14.84	8.953	9.922	14.482	16.447	18.929	13.693	19.122	12.211	14.509	17.091	13.769	19.152	24.386	11.115	23.108	21.702	15.719	13.224	26.596	17.669	18.833	19.715	19.28	19.242	13.905	24.244	20.429	13.732	12.776	12.033	9.484			80	7.554	10.228	18.563
81.9048	8.548	9.949	13.786	15.714	8.155	15.065	16.886	14.082	16.134	25.946	13.925	15.11	8.616	9.975	14.46	16.85	17.824	13.818	19.365	10.974	14.547	17.755	14.244	19.373	24.511	11.82	21.817	21.553	16.474	13.653	26.09	16.744	18.229	18.599	18.509	18.991	14.676	23.751	20.017	12.542	12.103	11.696	9.115			81.9048	7.242	10.753	19.358
83.8095	8.904	10.591	13.636	14.762	8.108	14.317	17.417	12.859	16.024	26.315	13.834	15.135	8.991	9.984	15.263	17.199	18.576	13.69	18.155	12.702	14.748	16.809	13.84	18.975	25.375	10.779	18.828	21.585	16.456	13.558	27.427	16.242	19.26	18.832	18.697	18.318	15.703	24.083	21.193	13.06	11.518	11.859	9.013			83.8095	7.309	11.222	21.346
85.7143	8.969	9.978	13.832	14.452	7.635	14.228	17.223	12.659	15.61	26.924	13.317	15.454	9.005	10.206	15.058	16.76	19.059	13.601	17.777	12.886	15.258	17.745	13.096	19.722	24.818	11.197	18.376	21.649	16.684	12.942	28.303	17.159	19.812	19.723	19.059	18.948	14.824	23.184	21.681	14.173	11.93	12.005	9.07			85.7143	7.585	10.71	20.859
87.619	8.548	9.431	13.911	15.393	7.957	14.65	16.754	12.841	16	24.804	14.07	15.282	9.095	10.745	15.102	17.642	19.647	13.863	17.986	12.044	15.038	18.618	12.776	20.576	25.341	12.246	19.871	20.936	17.737	13.388	28.079	17.34	20.104	18.518	18.546	19.512	14.716	23.074	21.723	13.643	12.033	12.158	9.465			87.619	7.628	11.043	18.613
89.5238	8.526	9.708	13.532	15.798	8.213	15.561	17.08	13.594	15.963	24.783	13.638	14.718	9.18	9.975	14.438	17.301	20.082	13.837	17.534	12.965	15.308	18.273	13.821	20.278	25.568	11.402	20.785	20.872	17.947	13.435	28.966	17.217	19.604	17.642	18.815	18.256	14.581	24.069	21.815	13.827	11.647	12.043	9.943			89.5238	7.257	11.333	17.921
91.4286	8.952	9.263	12.818	15.869	7.181	16.268	17.017	13.671	16.061	27	13.583	15.448	8.981	9.016	13.81	15.846	18.424	14.118	16.595	12.57	15.667	17.027	14.699	19.608	25.614	10.197	20.441	20.723	16.596	13.531	29.18	17.061	19.812	17.131	18.963	17.611	14.432	24.327	21.63	14.292	11.886	11.207	9.962			91.4286	7.098	10.772	18.484
93.3333	9.268	9.38	12.5	14.048	7.043	15.813	17.143	14.135	16.098	25.804	13.774	14.448	8.616	9.391	13.518	16.825	18.094	13.642	17.405	12.5	14.553	16.009	14.212	18.981	25.591	9.779	20.151	20.085	15.526	12.82	29.618	16.27	20.365	17.307	18.786	18.455	14.824	24.442	20.294	13.506	12.051	11.049	9.643			93.3333	7.604	10.704	21.962
95.2381	8.754	10.321	13.068	12.81	7.412	14.081	17.32	14.276	16.171	25.196	13.312	14.38	8.891	9.206	13.708	16.935	18.835	12.562	17.973	14.026	14.013	16.164	13.872	19.392	24.932	10.377	18.398	20.277	15.947	11.946	29.899	16.744	20.552	17.533	18.424	18.886	24.135	23.608	20.521	13.292	12.147	12.065	9.516			95.2381	7.803	10.877	23.208
97.1429	8.281	9.898	13.129	13.25	7.065	14.024	17.491	13.029	15.854	26.315	13.382	15.239	9.555	9.588	14.19	15.992	18.376	13.214	17.264	14.377	14.371	16.491	13.212	20.032	25.08	10.443	17.677	20.489	15.754	12.344	28.101	16.9	21.354	17.423	18.506	18.687	26.23	23.76	21.756	13.732	12.085	12.038	9.459			97.1429	7.65	11.284	19.494
99.0476	8.531	8.912	12.879	13.726	7.148	14.691	17.166	12.965	16.537	25.293	12.95	14.798	8.896	9.547	13.044	14.967	18.318	13.115	18.02	13.737	14.075	16.518	13.686	19.943	24.023	9.877	18.903	20.989	15.123	12.636	27.629	16.031	19.562	17.212	18.185	19	16.311	24.387	19.84	13.226	11.868	11.44	9.758			99.0476	7.58	10.475	16.845
100.952	8.504	8.847	13.314	14.429	7.661	14.699	16.857	13.835	16.085	24.446	13.085	14.681	9.028	9.453	12.927	15.419	17.953	12.665	18.068	13.509	14.088	15.673	14.301	19.722	25.205	10.189	19.419	21.596	14.842	13.126	27.966	16.231	18.76	16.73	18.133	19.967	15.108	24.461	19.202	13.06	11.941	12.005	10.013			100.952	7.357	10.043	17.456
102.857	8.342	8.533	13.936	14.56	7.726	15.171	17.303	12.682	14.78	24.554	13.427	13.84	9.417	9.823	13.759	17.065	18.071	12.409	16.953	12.868	14.302	15.536	13.128	19.171	26.227	10.762	19.28	21.489	14.439	13.316	27.056	17.329	19.031	16.051	19.1	19.858	15.676	23.977	21.16	13.798	11.934	11.603	9.866			102.857	7.741	11.704	19.69
104.762	8.351	8.474	13.657	15.155	7.975	14.35	17.291	12.459	14.427	24.022	13.558	13.742	9.175	9.226	14.467	17.439	18.506	12.403	17.412	12.526	14.899	16.673	13.135	19.487	24.523	11.615	19.677	20.426	15.158	13.037	28.371	17.933	18.083	16.701	19.867	20.085	16.014	24.253	21.773	13.714	12.114	10.766	8.72			104.762	7.659	15.716	20.642
106.667	8.417	9.263	13.543	15.274	7.996	14.341	17.04	12.976	14.78	24.283	13.221	14.521	8.825	9.35	15.117	16.589	18.047	12.968	18.128	13.096	14.503	16.991	13.115	18.994	24.307	11.164	20.634	20.83	14.965	12.48	28.124	17.429	19.052	16.796	19.926	19.502	16.568	25.3	21.059	13.452	12.5	12.087	8.484			106.667	7.463	21.037	20.227
108.571	8.513	9.35	13.95	15.31	7.585	14.935	16.594	12.706	15.78	24.337	12.638	14.656	8.365	9.605	14.401	16.049	18.788	12.958	17.682	12.737	14.208	16	12.583	18.443	25.659	10.459	20.473	21.372	13.456	12.51	26.798	16.596	19.406	16.416	19.089	18.583	15.932	24.452	20.992	13.863	11.897	12.636	9.312			108.571	7.398	20.648	19.272
110.476	8.443	9.175	13.639	15.56	7.412	15.683	17.126	13.082	15.378	25.13	13.598	15.098	8.616	9.407	14.672	16.776	19.976	12.649	17.858	11.254	14.748	15.945	13.186	19.196	25.739	10.541	19.559	20.67	14.491	13.259	28.539	16.844	19.479	17.088	18.727	19.351	17.122	23.074	20.387	13.708	11.29	12.158	9.038			110.476	6.911	16.228	18.785
112.381	8.447	9.314	13.889	16.131	7.206	16.065	17.817	13.124	15.963	26.815	14.342	14.994	9.066	10.095	15.095	17.15	20.141	13.147	18.216	11.263	14.893	17.255	13.622	19.076	25.432	10.721	20.204	20.415	14.807	13.537	27.73	17.557	19	17.263	19.38	19.062	17.23	23.152	19.681	13.411	11.46	12.614	9.236			112.381	6.784	12.852	17.828
114.286	8.724	9.905	13.764	16.952	7.332	14.195	17.326	13.394	17.524	26.717	13.618	14.368	9.327	10.461	14.095	17.435	20.165	13.38	18.291	11.833	14.528	18.682	14.09	18.848	25.841	10.328	21.043	20.234	15.018	13.861	26.955	17.259	18.698	17.307	18.819	17.891	16.108	23.525	20.134	13.506	11.643	12.179	9.841			114.286	7.23	10.87	15.835
116.19	8.421	9.036	13.6	15.369	7.375	13.992	17.36	13.153	16.561	26.707	13.663	13.951	9.028	10.091	14.38	17.341	20.576	13.323	18.101	12.316	14.855	17.7	14.212	19.342	24.739	10.041	20.312	20.011	15.439	13.32	29.483	16.738	19.375	17.044	17.299	17.735	16.041	24.023	20.328	12.976	11.529	11.098	9.758			116.19	7.628	10.747	15.291
118.095	8.461	9.153	14.325	14.952	7.765	15.285	17.554	13.5	14.598	26.978	14.146	14.613	9.308	10.062	15.139	16.874	19.541	13.7	18.588	12.368	14.755	16.809	13.782	19.956	24.705	10.107	21.312	20.628	15.018	12.663	29.27	16.568	19.052	16.818	17.554	18.739	16.608	35.355	20.134	12.655	11.154	10.658	9.803			118.095	7.633	10.531	15.131
120	8.031	9.504	14.35	15.167	7.69	14.911	16.983	12.935	14.537	26.598	13.588	14.436	9.815	9.852	14.285	16.52	17.518	13.591	18.378	12.193	14.384	17.373	13.865	20.158	25.182	11.254	20.452	21.968	15.754	12.527	28.517	16.983	18.052	17.139	18.369	18.782	17.203	37.461	20.521	12.393	11.062	10.859	9.554			120	7.336	10.068	14.461
121.905	7.658	9.124	13.657	14.083	7.329	14.74	16.017	12.165	14.512	25.62	13.181	14.307	9.081	9.733	13.73	16.886	18	13.827	17.757	12.167	14.748	17.527	13.314	19.892	25.557	11.697	20.946	21.681	15.386	12.5	29.315	17.32	18.021	18.343	18.594	18.27	16.946	27.401	20.857	12.357	11.783	11.092	9.522			121.905	7.17	9.969	14.093
123.81	8.057	8.847	14.311	13.369	8.126	15.626	16.149	12.906	15.646	24.924	13.372	14.638	8.607	10.218	14.226	17.264	19.494	13.728	18.703	11.588	14.553	17.191	13.045	19.677	25.034	10.516	37.301	20.564	13.807	13.122	29.517	17.404	19.74	18.803	18.432	18.716	16.514	26.581	21.395	12.845	11.732	11.592	10.019			123.81	7.412	10.117	14.05
125.714	8.425	9.124	14.532	14.464	8.087	15.26	16.223	13.588	16.561	25.75	13.724	14.123	8.796	10.235	13.38	16.829	18.847	13.256	19.216	11.386	15.447	17.436	13.359	20.19	24.682	10.549	40.946	20.394	14.526	13.908	29.146	16.972	19.281	18	18.185	19.128	16.338	26.747	21.563	12.589	11.886	11.326	9.312			125.714	7.516	10.068	14.702
127.619	8.93	9.942	12.982	14.988	7.841	14.447	16.366	13.524	15.988	26.38	13.724	14.773	8.886	9.971	13.533	16.337	17.847	13.47	17.804	11.825	15.497	17.827	12.795	19.753	24.216	10.893	25.968	20.181	16.211	13.32	28.18	16.727	19.146	18.036	18.472	18.588	16.838	25.765	19.697	13.208	11.926	11.516	9.312			127.619	7.657	10.117	15.055
129.524	9.114	10.547	12.879	14.5	7.596	14.463	17.417	12.859	14.951	26.717	13.196	15.098	8.72	9.934	14.635	16.22	18.612	13.719	17.209	12.289	14.792	17.055	12.821	17.924	24.443	10.213	20.591	19.851	15.842	13.01	27.034	17.354	18.74	19.102	18.391	18.161	16.919	25.866	18.933	13.53	11.368	12.011	8.847			129.524	7.64	9.895	14.551
131.429	8.632	10.489	13.686	14.714	7.289	14.659	16.754	12.488	13.573	26.163	13.005	14.319	8.408	10.082	15.255	15.589	18.824	13.709	17.804	12.167	14.987	17.264	13.192	18.171	25.068	10.139	19.742	20.606	18.088	13.35	28.944	16.733	17.312	18.35	18.221	18.791	16.419	26.576	19.252	13.601	11.665	11.658	8.325			131.429	7.511	9.58	14.348
133.333	8.303	9.453	13.632	15.131	7.671	13.902	16.12	12.682	13.451	25.467	13.281	14.27	9	9.564	14.482	15.606	18.671	13.284	17.709	11.228	14.692	18.445	13.385	19.43	24.159	10.18	20.591	21.277	21.158	13.221	29.404	16.571	17.521	16.511	18.077	18.365	16.027	25.866	18.664	14.679	11.404	11.587	9.159			133.333	7.283	10.543	14.401
135.238	8.232	9.204	13.636	14.56	7.924	13.48	16.931	13.329	14.171	22.913	14.005	14.65	8.886	9.42	13.248	15.671	18.306	13.029	17.142	10.93	14.145	18.082	14.423	18.177	23.5	10.475	20.473	19.979	19.825	13.143	26.236	17.12	17.292	16.27	18.081	17.754	16.284	25.622	19.664	14.863	10.882	11.397	8.892			135.238	7.451	10.593	13.759
137.143	7.741	9.299	13.171	14.548	8.141	14.366	17.023	13.518	14.439	23.272	13.884	15.018	8.588	9.786	13.255	15.854	19.682	13.313	17.02	10.553	14.296	16.5	14.077	17.228	24.136	10.475	22.29	20.851	19.105	12.895	25.697	16.702	17.25	17.445	17.779	17.867	17.27	26.59	20.874	13.839	11.206	11.418	8.025			137.143	7.465	9.901	13.346
139.048	8.061	8.854	13.35	15.024	7.603	13.618	16.823	12.882	13.854	24.598	14.146	14.908	8.175	9.198	12.825	15.902	20.506	13.313	17.649	10.816	14.478	15.955	12.532	17.646	24.091	10.09	22.247	22.17	18.123	12.959	28.124	16.262	17.323	16.956	17.432	18.389	17.581	25.765	20.891	12.792	11.434	11.223	7.911			139.048	7.542	10.265	17.391
140.952	8.461	8.328	13.736	14.321	7.245	13.659	17.166	12.224	13.671	24.033	13.558	14.141	7.531	9.004	12.591	15.061	18.765	12.585	18.655	11.921	14.434	16.482	13.474	17.924	22.75	10.303	18.968	20.777	16.737	12.755	30.022	16.033	17.5	16.62	18.236	18.886	17.041	24.571	21.076	13.071	11.298	11.451	8.529			140.952	8.029	10.568	20.697
142.857	8.044	8.708	13.404	14.512	7.668	14.951	16.046	12.588	14.28	24.261	12.186	14.086	8.422	9.527	13.774	15.293	18.941	12.364	18.628	11.561	14.34	16.436	13.853	18	23.773	10.648	20.129	20.787	17.368	13	29.303	16.148	17.344	17.409	18.199	18.469	16.676	25.166	21.017	12.988	10.849	11.543	8.115			142.857	7.516	10.222	19.726
144.762	8.329	9.007	13.264	14.548	7.484	14.398	14.629	12.565	15.354	24.283	12.417	13.38	8.905	9.86	13.978	15.663	19.282	13.47	17.534	10.939	13.855	16.655	13.462	18.538	24.33	11.066	20.925	20.926	18.544	12.724	29.652	15.992	17.469	17.847	17.133	17.251	17.257	25.47	20.966	12.196	10.5	10.913	8.197			144.762	6.811	10.469	18.53
146.667	8.351	8.876	12.214	14.833	7.249	14.748	15.297	12.865	15.902	24.804	13.02	13.117	9.123	9.667	13.672	15.732	17.988	14.07	16.784	10.737	13.95	17.291	13.731	19.956	24.705	11.115	19.72	19.947	17.316	12.034	31.438	16.535	17.719	18.343	17.605	17.043	16.541	25.286	21.933	12.488	10.463	10.81	9.764			146.667	6.942	9.833	16.792
148.571	7.724	8.467	12.032	14.238	7.357	15.333	16.103	12.718	15.549	24.489	13.01	14	8.645	9.267	14.912	16.276	18.282	13.428	17.628	11.061	14.421	16.191	12.75	19.873	26.182	10.238	21.688	19.862	14.754	12.823	30.169	17.234	18.469	17.474	18.07	17.706	16.595	25.539	21.622	13.161	10.647	10.804	9.987			148.571	7.158	10.673	15.742
150.476	8.702	9.102	12.811	13	7.657	14.724	15.217	12.359	14.598	26.609	12.849	14.755	8.521	9.638	15.533	16.443	20.306	12.879	17.649	11.044	15.547	16.173	12.135	20.576	25.216	10.746	37.194	20.989	15.175	13.408	29.449	16.638	18	16.022	17.203	17.455	17.946	25.419	20.336	13.446	10.908	10.848	9.255			150.476	7.201	11.438	15.685
152.381	8.947	9.708	13.364	13.357	7.592	14.041	15.217	13.129	14	27.163	13.226	14.644	8.943	9.86	14.526	15.687	18.741	12.789	16.912	10.465	15.214	17.036	11.75	20.576	23.92	12.156	37.194	22.298	15.386	12.537	31.056	15.657	18.031	16.701	17.159	17.123	18.162	25.516	19.941	12.875	10.452	11.141	8.834			152.381	7.321	10.741	15.422
154.286	7.421	8.92	13.904	13.464	7.152	14.699	15.326	12.859	14.476	25.25	13.583	14.583	8.54	9.531	13.818	15.24	17.706	12.447	17.155	10.263	14.799	16.045	12.333	18.772	24.591	11.131	29.903	21.521	13.965	11.905	31.719	15.964	19.198	18.453	17.79	16.91	16.595	26.092	19.252	12.714	10.555	10.793	9.261			154.286	7.487	10.759	14.804
156.19	7.206	8.664	13.454	13.357	6.581	15.593	15.246	12.406	14.866	25.043	14.01	14.994	8.218	9.313	14.007	15.333	19.212	12.086	16.838	11.237	14.579	16.064	13.064	18.823	23.898	10.016	33.409	19.915	14.246	12.425	30.146	16.744	17.708	18.263	17.579	17.953	15.5	25.696	18.689	13.601	10.831	10.098	9.401			156.19	7.504	10.685	14.828
158.095	7.794	8.533	13.214	13.774	6.946	15.065	15.183	12.424	14.402	25.228	13.96	14.706	8.531	8.675	13.796	15.931	19.224	12.38	16.784	11.474	14.673	16.573	12.455	19.006	23.295	9.984	25.871	20.191	14.596	12.425	29.112	16.557	18.083	24.839	18.443	18.085	15.743	25.166	18.235	13.881	10.607	10.989	8.93			158.095	7.446	10.623	14.788
160	7.68	8.146	13.279	14.357	7.004	14.715	15.143	11.753	14.78	25.543	13.558	13.613	8.744	8.473	13.876	15.984	18.518	12.981	16.75	10.939	14.717	16.264	12.763	18.38	24.216	10.172	27.699	19.223	14.333	12.167	29.652	16.136	18.802	24.307	18.867	17.223	15.514	24.53	18.479	12.744	10.691	11.832	8.783			160	7.518	10.222	14.754
161.905	7.526	8.591	13.418	14.75	6.859	13.789	15.56	11.1	15.378	25.293	13.116	12.926	8.393	8.626	14.044	16.305	17.459	12.521	16.878	11.368	13.403	15.991	13.724	17.253	23.352	10.311	32.645	18.617	14.895	12.367	29.843	16.212	19.177	16.964	18.299	17.536	15.635	25.078	18.597	12.429	10.754	11.446	8.885			161.905	7.47	9.957	14.308
163.81	8.434	8.504	13.386	14.548	6.881	13.724	15.594	11.3	14.744	25.043	12.729	14.202	8.024	8.815	13.613	17.061	17.294	12.419	17.432	11.263	13.327	15.755	13.455	16.949	23.125	10.221	26.366	20.511	15.351	12.177	30.921	16.451	19.031	16.642	17.446	17.237	15.459	25.037	18.403	13.19	10.776	10.821	8.809			163.81	7.633	10.512	14.303
165.714	8.518	8.577	13.25	15.083	6.567	14.39	15.777	11.935	13.756	24.326	13.322	14.552	8.171	8.621	13.263	16.309	18.729	12.482	17.757	10.746	13.899	16.7	12.731	18.089	24.159	10.311	28.505	21.021	15.246	12.446	30.753	16.253	18.021	17.482	17.303	17.687	16.405	24.281	18.882	12.565	11.261	11.554	8.013			165.714	7.993	11.37	15.358
167.619	7.627	9.234	12.932	16	6.646	13.561	15.64	12.453	13.39	23.935	14.231	14.718	8.171	8.601	14.117	15.74	19.071	12.294	17.541	10.474	14.541	16.518	12.577	18.987	23.989	10.5	27.022	20.745	14.877	12.272	31.124	15.861	18.354	19.248	18.299	19.801	16.838	24.35	20.336	12.577	11.36	12.489	8.771			167.619	8.225	11.364	14.869
169.524	8.088	9.27	13.207	15.964	6.978	14.488	15.989	12.418	14.524	24.043	14.015	15.521	8.545	9.284	14.328	16.5	19.588	12.655	16.858	11.412	15.616	15.682	12.192	18.335	24.955	11.205	19.323	21.734	14.07	12.364	30.09	16.334	17.896	18.102	17.517	19.858	17.149	24.415	21.076	13.685	11.228	11.75	9.197			169.524	8.283	10.846	14.68
171.429	8.522	8.956	13.971	15.155	7.729	15.228	16.143	12.212	15.561	24.185	13.829	14.301	8.763	9.276	13.92	16.35	21.482	13.077	17.216	11.702	15.472	15.8	12.096	18.772	25.955	11.885	19.366	21.936	13.07	13.02	26.966	16.819	18.135	17.489	17.616	19.73	18.189	24.94	20.546	13.101	10.941	11.071	8.529			171.429	7.897	10.568	15.501
173.333	8.482	9.263	13.757	14.905	7.534	14.512	15.4	12.812	15.195	26	13.799	13.393	9.085	9.049	14.007	16.419	21.459	13.083	17.993	11.658	14.623	16.545	12.865	21.456	25.5	10.639	32	21.17	13.456	13.35	26.91	16.777	18.635	17.92	19.125	19.806	17.568	25.318	20.067	13.327	10.735	11.163	8.917			173.333	7.7	11.802	15.375
175.238	8.364	10.343	14.143	14.476	7.245	13.911	15.737	12.959	13.768	27.652	13.704	14.577	9.512	9.206	15.54	16.87	19.635	13.144	19.155	12.316	14.686	17.355	13.724	29.253	24.557	10.033	32.183	20.894	15.211	13.306	28.506	16.616	18.031	18	19.288	18.882	16.23	25.829	19.857	13.696	11.29	11.897	8.618			175.238	8.343	15.864	14.921
177.143	8.114	10.08	14.254	14.845	7.639	15.179	17.194	12.553	13.512	26.272	14.101	15.301	9.398	9.667	16.336	16.589	19.518	13.23	19.466	11.64	14.396	18.009	14.513	34.949	25.136	10.361	21.247	21.638	16.439	13.449	29.169	16.471	17.49	18.036	18.524	18.929	14.959	25.295	18.723	13.125	11.581	12.038	8.274			177.143	8.403	20.543	14.747
179.048	8.491	9.577	14.075	15.44	7.856	16.447	17.12	12.994	14.793	25.065	14.166	15.012	9.507	9.391	14.737	16.894	18.835	12.866	18.777	11.105	14.428	18.118	15.135	32.335	25.33	9.598	21.925	21.702	15.807	13.241	28.573	16.053	17.062	17.796	18.214	18.673	15.27	25.157	18.748	13.143	11.371	11.391	8.586			179.048	8.537	20.889	15.045
180.952	8.89	9.27	14.229	15.524	7.787	16.642	16.731	14.353	15.195	25.272	13.92	15.503	9.014	8.77	14.139	17	17.624	12.799	17.905	10.807	13.994	16.482	14.288	28.532	24.091	9.139	23.839	21.479	15.123	12.806	27.618	16.159	16.948	17.62	17.76	17.749	15.459	25.641	19.723	12.845	11.886	11.179	9			180.952	8.674	17.031	15.325
182.857	8.276	9.109	13.8	16.048	7.469	15.593	16.417	13.553	14.329	25.978	13.593	15.012	9.303	9.222	14.934	16.22	18.235	13.185	16.514	10.921	13.698	16.273	12.417	26.633	23.591	9.664	24.333	23.149	16.175	12.347	26.82	16.727	18	16.504	17.882	18.09	14.054	25.313	19.941	12.292	11.684	11.016	8.656			182.857	8.647	14.414	14.912
184.762	7.399	9.051	13.057	15	7.383	14.081	17.406	12.118	13.561	25.38	13.131	14.117	9.374	9.387	15.664	16.159	18.588	13.246	15.905	11.351	13.918	17.636	12.442	27.329	23.682	10.713	20.763	22.255	16.316	11.779	30.348	16.301	18.719	16.504	18.144	19.436	14.554	24.82	19.37	12.327	11.107	11.179	7.478			184.762	8.854	12.877	15.014
186.667	7.846	8.818	13.029	15.286	6.935	14.431	18	12.071	15.049	24.261	13.317	13.914	9.118	9.263	15.416	16.374	18.282	13.645	17.52	11.868	13.667	17.145	13.154	28.905	24.148	11.008	20.022	20.702	16.193	12.388	32.258	16.242	19.573	17.394	18.148	20.033	16.486	25.876	20.395	12.97	11.57	12.239	8.089			186.667	8.542	11.512	15.274
188.571	8.386	8.92	13.329	15.738	6.877	14.382	16.069	12.612	15.549	23.065	13.774	13.687	9.45	9.535	14.985	16.638	18.435	13.393	18.622	11.763	13.95	16.227	12.577	32.209	25.682	10.918	20.366	21.457	16.509	13.034	29.472	17.078	18.917	16.971	18.173	19.147	16.392	26.23	21.605	13.03	11.43	12.207	9.592			188.571	8.194	10.784	16.399
190.476	8.333	9.226	13.161	14.952	7.04	14.902	15.851	12.312	14.341	21.391	13.749	14.227	9	9.477	15.197	16.744	18.706	13.086	17.27	11.289	14.843	16.527	13.115	35.804	25.159	11.098	20.882	21.532	15.807	12.66	28.067	17.217	17.729	16.248	18.048	18.559	14.649	25.636	20.807	12.524	11.011	11.082	9.115			190.476	7.693	10.395	19.788
192.381	8.474	9.336	13.55	15.179	7.271	14.878	16.486	12.082	15.146	22.065	13.121	14.755	8.559	8.975	15.577	17.248	18.588	13.182	16.926	11.132	14.434	17.318	12.917	36.918	24.023	10.738	23.516	20.596	15.474	12.68	29.449	17.63	18.49	16.496	18.244	18.867	14.324	25.41	19.882	12.851	11.574	11.451	8.338			192.381	7.624	10.407	21.785
194.286	8.197	9.416	13.954	15.512	7.877	14.447	16.726	12.441	16.439	24.174	13.166	14.448	9.242	9.267	15.708	16.951	19.624	12.438	17.324	11.772	14.094	18.6	12.788	34.684	25.545	10.762	23.151	21.383	16.702	12.663	28.326	17.513	17.406	16.423	18.185	19.019	14.081	25.29	19.588	12.845	11.647	11.913	9.191			194.286	7.432	10.63	19.456
196.19	8.246	9.343	13.061	16	7.227	14.642	16.6	12.653	15.256	25.141	13.045	14.049	9.545	9.745	14.964	16.431	19.318	12.246	18.061	11.904	14.906	17.845	13.346	36.614	24.557	11.525	22.226	22.021	16.07	12.197	27.438	16.66	17.167	17.095	18.716	18.915	14.757	24.309	19.067	12.685	10.956	12.054	9.771			196.19	7.525	10.494	16.652
198.095	8.158	9.453	12.718	16.167	6.903	13.862	15.154	11.9	13.841	24.435	12.985	14.46	8.891	9.296	13.956	16.272	17.776	12.687	18.223	11.14	15.491	16.673	12.378	38.12	22.545	10.885	22.108	22.117	14.263	12.218	28.944	16.691	18.812	16.672	18.915	19.299	15.324	23.198	19.765	13.048	10.938	12.158	9.268			198.095	7.981	10.438	15.986
200	8.048	9.285	13.246	15.155	7.339	14.057	13.72	11.718	14.085	24.913	13.683	15.117	9.076	9.185	14.635	15.598	18.082	13.3	16.669	11.193	15.836	17.655	13.179	38.627	22.5	10.377	20.161	22.468	14.649	12.5	29.899	16.791	18.927	15.701	18.55	19.36	15.946	24.005	20.042	13.131	11.037	11.25	9.503			200	7.628	10.451	15.317
201.905	8.68	8.628	13.293	14.762	7.141	15.098	15.183	13.006	15.11	25.087	13.915	15.509	9.052	9.514	15.467	16.15	18.482	13.61	16.703	11.298	15.151	17.864	14.218	39.101	23.455	10.623	19.742	21.84	15.509	13.065	29.36	17.493	19.052	17.38	18.325	19.445	16.405	23.097	19.471	13.417	10.82	11.821	9.229			201.905	7.758	10.031	14.628
203.81	9.004	8.635	13.625	15.107	7.123	15.098	17.566	12.971	14.524	25.022	13.693	15.356	8.867	9.675	15.372	17.813	19.447	13.284	16.939	11.816	14.648	17.936	13.359	37.823	25.466	10.598	19.237	21.149	15.596	13.422	28.607	17.019	18.083	18.38	18.015	19.782	15.365	23.3	20.336	13.077	11.048	12.408	8.592			203.81	8.24	9.685	15.234
205.714	8.781	9.241	13.929	14.571	7.285	13.821	16.897	12.147	13.317	25.011	13.513	14.337	9.664	9.58	13.912	17.297	18.576	13.856	17.507	11.991	15.189	19.173	13.071	39.563	26.739	11.27	19.699	21.096	15.877	13.503	28.528	16.738	17.958	17.234	18.653	18.469	15.459	24.834	20.311	13.048	11.706	11.342	8.662			205.714	8.182	9.833	15.425
207.619	8.737	9.474	13.654	14.405	7.188	14.073	16.074	12	14.012	24.837	14.226	14.196	9.758	9.321	13.964	16.301	17.659	14.227	17.682	12.254	15.711	19.336	13.724	39.696	25.386	10.648	19.849	21.702	15.368	13.867	29.337	17.418	18.646	16.263	18.506	17.858	15.405	22.912	19.328	13.613	11.676	11.174	8.968			207.619	8.271	10.809	14.916
209.524	9.022	9.46	13.114	15.107	7.816	14.593	16.211	12.924	13.902	26.337	14.085	14.945	9.095	9.527	14.891	16.553	18.518	13.853	17.554	12.658	15.358	18.355	13.795	37.987	25.159	10.27	32.849	23.17	16.404	13.418	31.045	17.574	18.323	16.307	18.317	18.393	15.162	22.41	20.176	13.732	11.691	11.984	9.452			209.524	8.326	11.08	14.788
211.429	8.513	9.949	13.45	15.714	8.235	13.87	15.423	13.065	13.939	26.326	13.171	14.521	8.536	9.584	14.686	16.52	18.729	13.741	18.649	12.596	14.849	17.036	13.429	39.854	25.273	10.967	45.882	21.713	16.719	12.735	31.685	16.908	18.708	17.015	18.886	18.555	15	22.171	19.504	13.232	11.794	12.239	9.045			211.429	8.084	10.63	14.857
213.333	8.246	10.073	13.9	16.143	7.949	13.455	15.554	12.976	15.171	25.293	12.869	14.166	8.308	9.148	14.255	16.207	18.682	13.281	18.649	11.509	14.692	17.318	12.91	39.342	25.602	10.32	39.505	19.277	16.579	12.728	32.135	16.465	18.208	16.876	18.229	18.427	14.77	21.498	18.748	12.565	11.353	11.272	8.618			213.333	8.098	10.605	15.012
215.238	7.877	9.182	13.321	15.774	7.487	13.927	15.451	13.318	14.646	24.5	12.628	15.245	8.147	9.045	14.277	16.415	17.729	13.454	18.372	11.588	14.453	18.218	12.263	35.278	26.239	10.246	35.054	19.734	18.684	12.956	34.888	16.429	17.438	16.664	17.834	18.436	15.581	23.341	19.336	12.863	11.441	11.147	8.484			215.238	7.916	10.778	14.396
217.143	7.82	9.219	13.332	14.274	7.347	14.935	16.171	13.341	14.5	25.185	12.794	15.393	8.697	9.667	14.956	16.337	18.176	14.22	17.669	12.754	14.522	18.727	13.795	40.171	25.943	11.992	30.839	21.617	19.281	13.653	34.933	16.877	18.208	16.905	18.605	18.384	15.784	24.885	19.597	13.964	11.665	11.429	8.962			217.143	7.477	13.309	14.487
219.048	8.377	9.65	13.243	13.429	7.105	14.504	16.92	13.776	15.134	25.815	13.513	15.043	9.322	9.531	14.818	16.118	19.941	13.821	16.709	13.219	15.094	18.118	13.776	39.614	25.148	11.721	22.355	21.787	17.175	13.66	30.067	17.579	18.219	17.38	18.72	18.104	15.378	24.198	19.471	13.75	11.408	11.848	9.618			219.048	7.811	17.796	15.274
220.952	8.618	9.752	12.975	13.56	7.152	13.228	16.103	12.735	14.561	26.217	13.518	15.325	9.232	8.642	15.175	16.012	19.953	13.419	15.926	12.693	15.05	16.864	12.551	34.165	25.318	10.303	20.86	20.979	16.246	12.867	29	17.053	18.365	16.905	18.834	17.564	14.892	22.571	19.134	13.601	10.669	11.766	9.025			220.952	8.173	19.407	15.549
222.857	8.425	9.35	13.543	14.536	7.513	13.65	15.857	11.935	13.841	27.033	13.427	15.926	8.957	8.737	15.825	15.923	18.682	13.412	16.338	12.325	15.214	17.909	13.282	34.994	24.875	10.598	21.72	22.447	16.772	12.354	30.506	16.006	18.01	15.912	18.214	18.043	14.122	22.447	20.395	13.369	10.691	11.386	8.471			222.857	7.916	18.327	15.811
224.762	8.132	9.102	14.586	14.25	7.426	13.772	17.12	12.818	14.232	26.489	14.266	15.736	9.351	9.675	15.445	16.386	19.141	13.294	18.405	13.325	14.27	18.564	13.321	35.551	23.557	10.713	20.118	21.926	15.561	12.599	30.303	16.175	18.073	17.467	17.494	18.043	14.176	22.76	19.563	13.202	11.423	11.337	8.35			224.762	7.528	16.049	15.32
226.667	7.746	9.234	13.836	13.726	7.231	12.732	16.509	12.906	14.732	24.728	14.03	14.546	9.227	9.395	14.073	16.033	17.976	13.543	18.358	12.544	13.025	18.282	12.987	38.329	22.364	11.221	21.129	22.277	16.14	12.663	31	16.415	18.333	18.445	17.358	17.218	14.527	22.76	17.908	13.5	11.169	10.614	8.529			226.667	7.731	17.241	15.172
228.571	7.386	9.562	12.236	14.036	6.718	13.561	15	12.753	14.951	23.837	13.095	14.571	8.81	9.284	14.131	15.72	19.118	12.984	17.845	11.623	13.66	18.245	13.09	38.146	23.864	10.902	21.656	22.436	16.404	12.204	29.921	15.9	16.812	17.336	17.332	16.758	13.541	22.959	18	13.524	10.765	11.261	8.739			228.571	7.528	19.654	15.021
230.476	7.596	9.606	12.732	14.369	6.917	14.203	14.777	12.518	16.317	24.87	13.709	14.798	8.678	9.342	14.693	15.48	20.718	12.214	17.378	12.009	14.969	17.682	12.724	36.222	25.261	10.811	19.667	20.957	14.807	12.418	28.326	16.365	17.271	17.905	18.598	17.536	13.851	23.157	19.143	13.643	10.974	11.886	8.637			230.476	7.173	17.16	16.95
232.381	7.456	8.985	13.268	14.452	6.968	13.894	15.183	12.7	16.341	25.109	13.955	14.528	8.711	8.963	13.927	16.492	18.494	12.537	16.345	12.219	15.509	17.436	12.404	38.095	25.659	11.393	19.634	20.181	13.982	12.112	29.056	16.187	18.25	18.109	18.399	18.194	14.716	22.41	19.966	13.357	10.371	10.853	8.153			232.381	7.348	13.975	18.198
234.286	7.281	8.993	13.225	15	6.538	14.041	15.806	12.665	15.732	24.913	13.101	14.945	8.668	8.477	14.504	16.837	16.929	12.351	17.291	11.921	14.113	18.009	12.436	36.589	27.08	10.459	20.742	20.989	14.263	11.687	29.056	15.513	16.833	16.686	17.365	16.682	14.905	22.055	18.739	12.369	9.864	11.087	7.803			234.286	7.568	12.358	18.959
236.19	7.272	9.124	12.729	15.583	6.325	14.114	15.806	12.5	14.159	24.891	12.894	14.577	8.412	8.712	14.533	16.085	16.824	12.077	17.169	10.895	13.748	16.918	11.833	37.892	25.261	9.918	28.989	21.532	13.982	12.112	28.213	15.538	16.344	18.197	18.218	16.882	15.041	22.756	17.798	12.5	10.412	11.87	7.745			236.19	7.659	11.932	20.714
238.095	7.526	8.708	13.339	15.881	6.588	14.374	16.366	13.182	13.439	25.37	13.357	13.748	8.483	8.909	14.65	15.577	18.765	11.955	16.345	11.737	13.912	15.755	11.795	37.81	24.557	9.721	40.14	20.777	13.982	12.228	26.697	15.744	17.656	17.285	17.86	17.171	14.338	22.217	18.261	12.286	11.114	10.973	8.127			238.095	7.484	11.556	18.418
240	7.75	7.891	13.864	15.464	7.126	15.016	16.457	13.206	14.756	24.576	12.804	14.117	8.573	8.251	14.496	15.459	18.882	12.032	16.804	12.561	13.623	16.791	12.397	35.633	23.67	9.492	31.667	19.681	14.491	12.575	27.798	15.797	16.76	15.285	17.181	16.72	14.203	22.088	18.403	12.048	11.199	10.435	8.28			240	7.532	11.29	16.561
241.905	7.789	7.27	13.325	15.19	6.841	15.268	16.097	12.806	14.5	24.587	12.337	15.202	8.318	8.49	14.672	15.642	17.965	12.773	17.561	11.026	14.711	17.118	12.769	37.272	24.102	10.189	19	19.085	14.175	12.799	30.022	15.671	17.135	16.161	17.494	16.791	13.797	22.848	17.849	12.649	10.835	10.533	8.032			241.905	7.554	11.741	15.78
243.81	8.127	8.109	13.696	15.333	7.014	14.089	16.017	12.729	13.829	24.022	13.055	14.656	7.573	9.259	15.015	16.386	18.012	13.054	17.804	10.14	14.403	17.836	13.308	36.873	25.807	10.754	18.785	19.096	13.807	12.425	29.82	15.783	17.844	16.095	17.956	17.668	13.568	22.401	18.739	12.244	10.426	10.951	8.115			243.81	7.42	11.309	14.685
245.714	8.105	9.234	13.636	15	7.343	13.577	16.051	12.906	15.159	21.88	12.618	13.454	8.261	9.564	14.905	15.695	18.541	12.639	17.399	10.781	14.396	18	13.955	36.525	25.432	10.025	31	19.809	13.93	12.248	28.438	15.426	17.365	17.664	18.502	18.246	14.068	22.507	19.151	12.28	10.235	11.016	8.006			245.714	7.683	10.42	14.315
247.619	7.833	9.336	12.939	14.286	6.711	13.854	14.823	12.518	15.122	23.554	12.392	13.282	9.076	8.683	15	15.175	17.753	12.141	17.189	10.57	14.792	16.564	13.59	37.222	24.25	9.672	44.699	20.096	12.912	12.041	26.708	15.465	17.469	18.358	17.734	17.649	13.878	22.724	17.857	12.798	9.893	10.071	7.949			247.619	8.034	10.148	14.718
249.524	7.535	8.825	13.325	14.512	6.661	13.967	15.314	12.024	14.89	26.109	13.492	12.589	8.588	8.584	14.562	16.638	17.906	12.505	16.75	10.132	14.635	16.845	13.404	40.823	22.636	10.246	34.441	20.309	13.018	11.388	26.787	15.694	17.323	17.299	17.295	17.545	13.959	22.461	18.546	12.756	9.805	10.359	8.255			249.524	7.928	11.08	15.014
251.429	7.491	9.277	13.571	14.869	6.917	14.724	16.474	12.318	14.756	25.957	13.286	13.46	8.398	8.823	14.803	16.589	19.671	12.792	17.669	11.114	14.491	17.645	13.737	38.519	22.864	10.738	22.097	21.138	16.211	11.619	27.742	15.632	18.167	16.358	17.417	17.829	13.973	21.972	18.462	12.304	10.316	10.538	8.688			251.429	7.835	11.944	14.372
253.333	7.636	8.883	13.732	15.643	6.892	15.098	15.674	12.512	15.683	26.717	13.02	15.209	8.54	8.646	14.891	15.841	19.506	12.674	18.703	11.018	13.912	16.345	13.397	36.956	23.909	10.426	22.989	20.394	16.702	12.503	29.787	15.407	17.24	16.474	16.635	17.872	14.351	21.802	18.504	12.47	10.544	10.576	8.624			253.333	7.698	14.858	14.124
255.238	8.101	8.161	14.168	16.786	7.213	14.577	15.669	12.541	16.793	26.685	13.472	14.748	8.825	9.165	14.723	15.715	18.929	12.712	17.946	10.693	13.862	15.927	12.801	38.646	25.273	10.393	22.387	20.33	15.246	14.884	30.978	15.641	16.427	17.255	22.225	17.569	18.459	22.673	19.034	12.97	10.074	10.973	8.14			255.238	7.657	16.901	14.475
257.143	8.14	8.693	13.625	14.952	7.202	15.098	16.177	12.424	15.134	25.087	13.352	14.521	8.701	9.119	15.109	16.516	18.365	12.658	16.959	10.746	13.528	16.936	12.955	32.051	26.455	10.336	19.559	20.096	28.368	16.306	28.292	16.51	17.417	17.518	25.583	17.711	20.365	23.442	18.714	12.768	9.728	10.842	7.955			257.143	7.791	16.488	14.568
259.048	7.702	9.088	12.782	15.512	6.931	15.366	17.029	12.947	14.207	24.902	13.759	15.613	8.19	8.798	15.029	17.004	18.388	12.45	16.25	10.561	13.151	16.9	13.404	25.873	26	10.295	18.914	19.181	30.211	17.844	28.427	16.287	18.969	17.898	27.487	18.057	20.743	23.138	19.059	12.774	10.21	10.962	8.312			259.048	7.957	16.58	15.038
260.952	7.592	9.584	13.389	15.905	7.347	14.073	16.629	13.129	14.671	27	14.06	16.319	8.82	9.128	14.715	16.98	18.459	12.661	17.743	11.035	14.289	17.6	13.769	24.487	24.159	10.754	31.398	21	17.561	16.81	28.742	16.292	19.573	16.766	25.804	18.251	18.581	22.687	19.193	12.946	10.875	11.886	8.65			260.952	7.753	18.16	15.625
262.857	8.096	9.737	13.818	15.81	7.31	15.341	16.56	13.747	16.671	27.054	13.095	15.834	9.393	8.827	15.161	17.041	18.659	13.204	18.838	11.982	14.83	18.045	13.705	25.019	22.341	10.221	33.516	21.819	31.93	13.105	29.011	16.671	19.708	16.343	19.199	17.806	14.743	22.318	19.387	12.917	10.952	12.033	8.701			262.857	7.506	17.895	15.582
264.762	8.294	9.752	13.636	16.714	6.722	15.293	15.966	14.188	16.939	25.174	13.161	14.755	9.313	8.737	15.496	17.016	19.376	12.824	17.818	11.93	15.138	18.027	13.545	25.291	24.08	9.902	22.882	21.66	33.351	13.218	30.539	17.033	19.344	27.036	19.303	18.18	15.959	22.576	18.798	13.262	10.985	11.533	8.401			264.762	7.882	14.475	15.105
266.667	7.917	9.562	13.436	15.464	7.137	14.203	15.24	13.329	14.744	26.141	14.221	14.755	9.19	9.111	14.818	16.549	19.647	12.626	17.736	11.395	14.704	17.773	14.628	24.361	24.92	10.123	32.527	20.904	16.965	13.942	31.404	17.217	18.865	28.263	20.048	18.934	16.5	23.853	19.126	13.607	11.581	11.543	8.605			266.667	8.115	12.235	15.26
268.571	7.754	9.387	13.261	14.143	7.773	15.715	16.371	13.635	15.012	27.587	14.211	14.405	9.161	9.42	14.934	16.106	20.788	13.297	18.439	11.491	14.906	17.073	15.032	23.816	25.136	10.721	33.043	21.574	14.789	18.599	32.18	16.969	18.521	30.212	25.827	18.891	17.784	24.235	19.95	12.863	11.857	11.147	8.866			268.571	8.355	11.642	15.291
270.476	8.092	9.533	13.696	15.286	8.004	15.748	16.411	12.918	16.122	26.957	13.407	13.38	9.559	9.481	14.861	16.321	20.6	13.581	18.291	10.798	15.075	17.664	13.103	23.981	24.864	11.41	29.527	21.383	14.737	17.34	32.562	16.549	18.146	30.153	24.557	19.46	18.932	23.594	20.353	12.655	11.529	10.647	8.834			270.476	7.803	11.222	14.537
272.381	8.553	9.511	14.032	16.119	8.025	14.626	16.269	12.894	16.012	26.141	13.739	13.693	9.73	9.119	15.423	17.061	19	13.153	18.034	11.202	14.818	19	12.833	23.089	23.864	12.025	36.215	20.574	16.088	12.218	33.843	17.036	19.125	19.482	19.048	20.351	16.959	23.41	19.218	12.875	11.118	10.848	8.535			272.381	7.233	10.401	14.52
274.286	8.719	9.489	14.346	15.726	7.65	14.285	16.286	13.706	16.707	26.261	14.538	13.902	9.682	8.79	16.08	16.646	19.541	13.585	18.27	11.605	14.748	18.736	14.327	24.158	23.75	11.115	29.591	20.681	15.947	12.16	32.831	17.061	18.76	18.942	19.026	19.483	14.581	22.332	18.193	12.696	10.754	11.538	7.917			274.286	7.674	9.722	14.618
276.19	8.254	9.38	14.554	15.881	7.527	13.976	15.714	13.112	16.963	27.967	13.874	14	8.943	8.807	15.153	16.191	19.541	13.927	17.162	11.298	14.855	18.045	14.314	30.956	23.739	10.582	22.086	20.915	15	12.622	30.809	16.574	17.542	18.818	18.203	18.502	14.351	22.705	20.109	12.905	11.059	11.973	8.312			276.19	7.863	9.963	14.854
278.095	7.842	8.861	13.814	15.512	7.874	13.634	14.743	13.235	15.927	27.978	12.879	14.031	8.308	9.255	14.46	16.533	18.071	14	16.622	11.246	14.34	17.755	13.891	33.715	23.545	10.934	22.398	21.617	15.737	13.224	31.551	16.813	16.375	18.62	17.554	18.863	14.757	23.995	20.101	13.262	11.188	11.81	8.783			278.095	7.847	10.049	14.8
280	8.241	8.956	13.911	15.476	7.769	13.862	15.011	13.141	15.195	27.38	13.377	14.184	8.128	9.383	14.664	16.305	18.529	13.569	17.034	10.579	13.962	16.873	13.276	33.152	23.83	10.336	29.742	20.904	13.737	13.177	32.124	16.34	17.219	17.949	17.074	18.896	14.405	23.009	17.639	13.131	10.824	11.701	8.618			280	7.777	10.809	14.112
281.905	8.772	8.985	14.086	15.095	7.097	14.902	15.76	12.129	15.939	26.283	14.05	14.497	8.104	9.333	15.241	16.557	19.376	13.147	16.939	11.114	14.535	16.382	13.378	29.987	25.148	9.934	36.129	21.372	14.649	13.357	32.191	15.989	18.094	18.328	18.255	19.848	15.176	22.309	18.37	13.274	11.309	12.098	8.592			281.905	7.652	11.364	14.618
283.81	9.162	9.102	14.429	14.94	7.159	15.163	15.446	11.853	17.049	25.37	13.824	14.81	8.962	9.165	15.066	17.187	19.624	13.396	16.838	11.746	14.591	17.045	13.737	24.93	24.955	10.525	36.978	22.33	17.07	12.847	32.899	16.51	17.01	18.796	18.458	19.63	15.284	23.373	20.126	13.744	11.592	12.266	9.236			283.81	7.806	10.352	14.714
285.714	8.303	9.489	14.75	14.94	7.224	15.699	15.223	12.759	14.524	27.554	13.276	15.209	9.825	9.206	15.861	16.935	19.882	13.208	17.02	11.386	14.164	17.845	13.09	31.019	24.841	11.549	36.828	21.223	16.93	12.694	32.303	16.855	16.948	18.876	19.059	18.45	15.405	23.71	19.277	13.446	11.592	11.783	8.975			285.714	7.633	14.728	14.518
287.619	7.842	9.066	14.304	14.464	7.094	15.447	15.183	13.071	15.207	27.391	13.02	15.27	9.19	9.387	16.401	16.695	19.671	13.281	17.419	10.553	14.465	17.055	12.705	33.323	24.352	11.057	34.86	20.383	16.439	13.051	29.292	16.585	16.948	17.942	18.886	18.422	15.162	23.009	18.815	14.19	11.033	11.277	8.656			287.619	7.508	18.852	14.155
289.524	8.07	8.489	14.554	14.357	7.267	14.024	15.583	12.541	17.098	27.685	13.633	14.675	8.853	9.449	15.423	16.48	19.412	13.361	17.939	10.175	14.862	17.155	12.474	27.038	25.398	11.016	33.828	21.787	14.912	12.755	27.483	16.331	17.177	17.964	17.384	18.754	15.73	22.802	18.983	13.917	10.511	11.299	8.599			289.524	7.585	18.549	13.563
291.429	8.373	9.307	13.55	14.726	7.365	15.13	15.84	12.488	14.744	27.728	14.241	14.859	9.038	9.667	15.343	16.293	18.929	13.064	18.095	11.246	15.214	17.673	13.519	23.766	26.352	10.697	32.108	21.479	14.807	12.588	28.202	16.641	18.812	18.628	17.923	18.621	16.149	23.051	18.513	13.22	10.71	11.978	9			291.429	7.458	19.111	14.117
293.333	8.601	10.336	13.457	15.083	7.264	14.593	15.931	12.806	14.573	28.576	14.578	15.209	8.991	9.642	15.058	16.622	19.376	12.297	17.541	12.351	15.591	18.009	14.628	21.899	26.148	10.123	25.548	20.213	14.965	12.544	29.539	17.315	17.844	18.54	18.513	17.161	14.703	22.917	18.496	13.679	10.831	11.946	9.21			293.333	7.501	17.562	14.377
295.238	8.456	10.088	14.654	15.69	7.401	13.358	16.371	12.441	13.805	29.772	13.899	14.344	9.095	9.519	14.839	16.805	19.012	11.93	18.027	12.009	15.792	18.791	14.5	21.127	26.636	10.221	20.495	21.191	15.649	13.112	30.348	17.006	16.781	17.365	18.148	17.085	12.743	22.76	19.992	13.458	11.092	11.951	8.344			295.238	7.4	14.272	14.442
297.143	8.303	9.606	14.611	16.988	7.505	14.691	16.554	12.576	13.671	29.022	13.121	13.957	8.844	9.366	15.219	17.179	18.224	12.735	17.973	11.298	15.346	18.327	14.288	20.196	25.898	10.352	20.215	22.532	16.825	13.024	30.921	16.602	17.552	17.482	18.292	18	13.905	22.912	20.378	12.792	11.463	12.614	8.274			297.143	7.29	12.383	14.558
299.048	8.478	9.942	14.571	17.821	7.516	15.854	15.571	12.894	16.024	28.391	13.312	13.834	8.962	9.494	14.905	17.118	20.412	14.035	17.405	11.886	14.994	18.136	14.442	20.247	25.17	10.828	21.226	21.819	15.684	12.745	32.584	16.997	17.26	18.715	18.111	18.829	17.932	23.963	19.412	12.56	11.353	11.826	8.408			299.048	7.412	12.136	14.313
300.952	8.167	10.285	14.704	17.464	8.123	14.959	15.269	13.141	16.28	28.109	13.101	15.031	9.351	9.881	16.066	16.711	20	14.537	18.338	11.518	15.208	17.727	14.865	21.614	25.386	11.221	22.333	21.638	15.035	13.272	33.921	17.501	17.365	17.978	18.03	19.82	16.905	24.502	17.958	13.256	11.493	11.63	8.465			300.952	7.348	11.951	14.42
302.857	7.825	10.336	14.579	17.69	7.874	15.301	16.754	12.853	15.732	29	13.749	15.098	9.057	9.988	16.036	16.935	18.506	14.665	18.743	11.158	15.553	17.9	14.109	22.829	25.182	12.164	22.086	22.649	16.982	12.932	33.067	17.702	18.583	17.518	18.351	18.82	14.324	23.304	17.773	13.607	12.062	11.451	8.866			302.857	7.662	11.148	14.838
304.762	8.645	10.088	14.504	17.048	7.729	16.659	26.663	13.2	16.232	29.837	14.03	14.534	9.28	9.588	15.372	16.858	18.953	14.776	19.034	11.5	16.415	18.127	14.679	26.886	25.33	11.992	21.032	23.266	17.228	12.946	30.371	19.326	19.177	16.876	19.033	19.483	15.324	22.424	18.227	13.661	11.29	10.81	8.847			304.762	8.055	10.222	14.785
306.667	8.487	9.701	13.918	14.5	7.675	15.415	35.703	13.365	16.366	27.424	13.437	14.65	9.735	8.93	15.825	16.427	20.435	14.061	18.716	11.553	15.396	17.591	14.378	28.665	24.841	10.336	20.043	21.362	16.439	13.361	30.663	19.139	18.448	17.35	18.491	19.929	15.459	22.41	18.975	13.31	11.074	11.549	8.554			306.667	7.348	9.981	14.563
308.571	7.965	9.971	13.25	14.286	6.881	14.813	33.011	12.618	16.707	26.565	12.714	14.276	9.227	9.074	14.788	15.951	21.706	13.751	17.588	11.833	14.742	16.791	13.276	26.152	24.614	10.254	28.398	18.691	16.368	13.061	30.697	20.075	16.958	17.226	17.373	18.223	14.568	23	19.782	12.333	11.54	11.255	8.306			308.571	7.36	10.537	14.504
310.476	8.035	9.985	13.154	15.548	6.863	15.748	32.28	12.641	15.915	27.967	12.759	14.123	8.626	9.045	14.978	16.134	20.247	13.588	17.554	11.535	15.176	17.464	13.917	23.696	25.409	11.025	28.871	20.128	16.07	13.116	30.067	20.646	17.396	17.175	17.797	17.175	15.473	23.654	20.05	11.946	11.309	10.81	8.255			310.476	7.971	10.253	18.255
312.381	8.066	9.343	13.457	15.488	7.162	15.073	36.086	12.612	15.488	28.967	13.176	13.546	8.796	8.288	15	16.272	18.259	13.278	17.52	10.825	14.503	17.791	14.41	21.089	25.045	10.861	27.871	21.394	16.947	13.442	30.596	17.462	18.958	18.401	18.834	17.062	15.541	23.747	20.21	12.649	11.033	11.413	8.611			312.381	7.811	9.938	20.15
314.286	8.158	9.131	13.393	15.083	6.96	14.943	36.411	12.341	15.573	31.217	12.764	13.865	9	8.568	14.504	16.122	18.306	13.93	16.993	11.246	14.805	17.791	14.135	21.506	24.92	10.279	28.731	20.628	17.404	13.245	30.427	16.774	17.917	17.701	19.144	18.209	14.351	23.429	19.504	13.107	10.588	12.125	8.847			314.286	7.607	9.704	17.52
316.19	8.711	9.124	12.854	16.381	6.921	16.236	29.886	12.529	15.829	34.141	12.97	14.46	9.389	9.016	13.978	17.26	18.988	15.109	17.02	11.368	15.17	18.327	13.641	21.038	25.5	9.918	21.344	21.053	16.509	12.81	30.461	17.072	18.146	22.723	19.229	17.706	14.338	23.714	20.126	12.946	10.618	12.772	9.306			316.19	7.374	11.889	16.303
318.095	8.338	9.416	13.418	16.714	7.52	16.561	22.229	12.7	16.024	35.989	13.678	13.804	9.754	9.626	13.964	17.252	19.765	15.147	16.959	10.684	14.233	18.027	13.359	18.962	27.068	10.697	32.548	21.245	16.105	12.405	29.27	17.22	19.792	22.555	19.399	17.616	14.527	23.461	20.067	12.56	10.537	12.065	9.701			318.095	7.671	18.154	16.635
320	8.32	9.686	14.332	16.476	8.188	15.935	19.177	12.665	15.659	35.652	14.02	14.35	9.384	9.782	16.102	16.74	18.729	14.665	16.932	11.86	15.094	17.964	14.058	18.519	28.534	12.197	36.022	21.84	15.333	12.466	29.584	17.465	18.896	16.942	19.273	18.611	13.851	23.594	18.37	12.482	10.835	11.245	9.344			320	7.849	19.642	19.78
321.905	8.561	9.956	14.436	16.845	9.368	16.106	17.623	12.788	16.646	35.141	13.568	14.669	9.36	9.144	16.912	17.134	17.918	15.073	17.5	12.772	15.899	17.791	13.276	18.93	27.318	12.795	23.828	21.84	14.439	12.388	30.393	16.674	17.927	16.73	19.055	18.199	15.581	23.935	19.193	12.78	11.099	11.435	8.471			321.905	8.113	17.086	20.274
323.81	8.32	10.058	14.471	16.952	10.123	16	16.829	12.553	16.305	34.359	13.357	14.945	9.085	9.074	17.051	16.967	19.718	15.361	18.223	11.991	15.491	17.491	12.673	19.582	26.58	13.172	19.806	21.245	15.07	12.374	29.663	16.373	18.146	19.292	18.417	18.227	16.946	23.41	19.63	12.964	11.566	11.538	8.217			323.81	7.842	16.074	18.286
325.714	8.539	9.321	14.107	16.143	10.928	14.382	16.406	13.318	14.976	33.076	13.573	14.405	8.536	8.794	15.153	16.545	19.6	14.786	18.054	11.763	15.421	16.227	13.506	19.063	27.057	12.377	18.753	20.074	16.035	12.673	29.461	17.312	18.208	19.978	18.646	18.284	16.014	22.175	17.672	13.631	11.901	11.299	8.102			325.714	7.441	18.407	18.79
327.619	8.377	9.343	14.304	15.702	13.296	14.317	16.394	14.406	15.902	33.478	13.899	14.325	8.517	8.654	15.044	16.598	18.694	14.674	17.385	12.088	15	15.827	13.994	18.266	26.716	11.615	19.032	19.585	17.088	12.741	28.36	17.574	17.312	17.599	18.624	17.389	14.676	21.843	16.933	13.714	11.426	11.25	7.522			327.619	7.693	19.019	20.48
329.524	8.171	9.81	13.971	15.726	16.657	15.073	16.16	13.612	16.488	32.989	14.161	14.847	9.209	8.864	15.985	16.927	18.471	15.045	17.432	10.921	14.736	16.7	14.462	19.532	27.716	12.098	19.699	19.564	17.158	12.52	27.899	17.164	15.948	27.949	18.033	16.891	14.189	23.235	17.555	13.244	11.46	11.299	8.121			329.524	8.225	17.296	20.754
331.429	8.456	9.511	13.886	14.31	20.188	14.634	16.04	12.759	16.22	33.478	13.422	14.276	9.275	9.169	14.409	16.764	17.471	14.661	17.304	9.904	14.579	17.673	13.199	19.582	26.943	10.475	19.301	20.106	15.772	11.976	30.326	15.942	15.833	27.533	17.624	17.744	13.986	23.115	18.891	12.446	10.842	11.12	8.223			331.429	8.559	15.901	18.759
333.333	8.294	10.321	14.336	13.976	22.097	15.447	17.131	12.435	15.146	34	13.693	14.196	8.839	9.128	14.102	17.545	17.976	15.157	17.946	10.395	14.893	17.664	12.968	18.734	27.5	10.434	19.699	21.734	14.439	12.466	31.146	16.499	16.917	17.124	17.631	18.185	14.851	23.521	18.765	13	10.842	10.636	8.363			333.333	8.067	13.636	17.561
335.238	8.171	10.752	15.143	14.869	22.022	16.22	16.474	12.471	15.524	34.391	14.246	14.546	9.114	8.947	15.234	18.142	18.635	15.447	23.662	10.728	15.377	17.245	13.423	18.829	29.409	10.869	19.022	21.787	15.526	13.551	35.225	17.46	17.771	17.161	17.937	18.275	14.068	23.429	17.244	13.887	11.364	10.707	9.261			335.238	8.177	11.765	20.375
337.143	8.684	9.971	19.15	15.429	20.982	15.943	16.806	13.559	17.305	34.207	13.834	15.399	9.393	9.37	15.343	17.715	18.165	14.942	29.649	10.868	15.421	17.864	13.962	18.31	27.534	10.566	19.032	21.032	16.123	13.531	35.888	17.337	18.531	17.328	18.421	18.607	13.757	22.991	18.538	13.583	10.985	11.277	8.815			337.143	8.026	10.568	21.177
339.048	8.965	9.796	21.679	15.929	19.238	16.236	17.091	13.347	16.561	32.283	13.543	15.429	9.502	9.424	15.277	16.87	20.035	14.645	34.824	11.211	15.006	18.018	14.16	18.646	26.045	12.074	21.226	20.798	15.175	13.061	31.472	17.538	18.698	17.664	19.472	18.763	13.838	24.636	19.756	14.357	11.206	12.038	8.669			339.048	8.113	11.099	18.377
340.952	8.461	9.854	19.118	16.667	17.123	16.203	17.131	12.829	17.841	31.728	13.452	15.202	9.028	9.453	15.723	16.28	20.847	14.572	40.324	11.614	15.151	17.191	13.865	18.854	23.659	12.41	20.989	21.202	15.754	13.139	31.382	17.387	18.74	17.453	18.982	18.929	13.216	24.157	19.798	13.958	11.349	12.457	8.427			340.952	8.276	11.13	16.425
342.857	7.596	9.818	16.268	16.702	15.426	15.171	17.611	13.247	17.939	30.946	13.96	14.982	9.336	9.181	15.336	16.707	20.212	13.69	44.959	12.456	15.912	17.545	14.135	18.633	23.307	11.41	19.505	21.255	16.509	13.643	31.955	16.755	19.646	19.876	18.17	18.967	14.243	23.276	19.714	13.333	11.588	11.995	8.688			342.857	7.959	11.333	15.253
344.762	7.237	9.504	15.154	16.357	13.343	16.033	17.32	12.894	16.683	30.913	14.492	14.65	9.597	8.786	14.693	17.549	20.553	13.144	49.858	12.509	14.604	17.182	13.904	19.051	26.398	10.566	29.215	21.34	15.789	13.772	32.787	17.22	19.271	19.642	18.613	18.858	14.324	23.498	18.899	13.452	11.934	12.527	9.21			344.762	7.624	10.858	15.492
346.667	7.974	9.745	14.571	16.762	11.401	19.65	16.897	12.012	16.5	30.196	14.437	13.883	9.313	8.885	14.591	17.329	20.671	13.62	56.155	11.526	14.113	18.291	12.929	19.937	26.239	10.172	38.366	20.755	16.193	14.034	31.764	17.822	18.562	17.029	19.114	18.749	14.973	23.23	19.983	13.143	11.566	12.092	9.217			346.667	7.688	9.753	16.511
348.571	8.149	9.839	13.993	16.393	10.401	21.634	16.611	12.335	15.049	29.12	13.915	13.742	9.768	9.008	15.562	17.024	19.894	13.565	61.669	12.14	14.314	19.418	13.276	19.013	25.716	10.549	29.161	21.83	16.123	13.041	31.112	17.521	17.344	17.62	18.934	19.09	15.797	22.871	19.798	12.696	11.353	11.277	9.255			348.571	7.707	10.389	19.78
350.476	7.908	10.182	14.068	16.155	10.202	20.894	16.937	13.212	15.061	29.946	13.774	14.718	9.555	8.955	15.533	17.996	20.788	13.486	63.784	12.702	14.333	17.555	14.769	19.278	26.636	11.148	20.441	22.383	14.667	11.942	31.202	17.588	17.771	17.496	18.055	18.645	15.405	22.968	18.118	12.357	11.408	11.788	8.42			350.476	7.547	11.241	20.718
352.381	7.785	10.401	14.493	15.488	9.783	19.057	16.183	13.676	15.195	29.859	14.548	14.742	8.649	8.988	15.08	17.467	20.894	14.157	60.581	11.921	15.34	17.318	14.321	20.051	27.909	11.541	31.129	21.67	14.158	12.483	33.337	18.103	20.448	16.73	17.823	18.19	14.892	23.373	18.647	12.643	11.375	11.457	8.083			352.381	7.576	10.821	17.434
354.286	8.14	9.321	14.464	15.714	9.267	17.545	16.577	13.906	16.817	28.554	14.563	14.074	8.28	8.951	15.044	16.667	19.294	14.131	57.709	11.605	15.113	18.073	12.994	18.348	26.568	11.369	39.667	21.734	14.596	12.874	34.562	18.259	20.333	21.474	17.786	18.716	15.689	23.995	20.034	13.685	11.897	11.582	8.904			354.286	7.731	17.537	15.255
356.19	8.39	9.628	14.332	15.881	8.87	16.797	17.903	13.982	31.915	27.228	14.116	14.037	8.645	8.988	15.438	16.972	18.8	13.933	57.392	12.412	14.642	18.864	12.641	17.722	25.284	10.664	30.366	20.702	16.123	12.738	32.528	18.563	19.812	22.54	18.144	18.763	16.73	24.212	19.655	14.542	12.408	11.88	8.446			356.19	7.688	22.315	15.038
358.095	7.61	9.745	18.657	14.774	8.502	15.764	17.091	13.129	42.573	28.326	13.432	14.288	8.82	9.074	16.022	16.785	19.388	13.042	52.318	11.956	15.05	19.218	12.897	18.348	25.682	11.311	22.774	19.511	15.632	13.201	35.764	18.421	19.594	17.766	18.387	18.583	15.284	24.774	19.05	14.345	12.566	11.62	8.14			358.095	7.614	17.988	15.294
360	7.575	8.766	21.079	14.845	8.379	14.789	17.097	12.906	29.183	29.848	13.186	14.638	9.332	9.173	15.599	17.317	20.271	12.792	46.926	11.132	15.063	18.9	13.333	20.93	25.295	11.516	20.172	20.34	13.912	13.197	36.528	17.306	17.844	27.905	17.867	18.417	13.284	24.922	18.824	13.232	11.886	11.56	8.682			360	7.801	15.012	14.654
361.905	7.939	9.131	17.329	14.381	8.209	14.992	17.149	12.741	17.037	28.217	14.307	14.724	9.72	9.918	14.978	18.39	21.082	13.936	43.061	11.421	15.019	19.218	13.526	21.551	26.534	10.623	19.376	21.053	14.719	13.051	35.91	16.975	17.208	28.219	18.07	17.877	15.581	23.263	19.529	13.31	11.629	11.603	8.096			361.905	8.137	13.858	14.594
363.81	8.281	10.044	15.293	14.393	8.184	15.618	16.274	12.112	16.915	27.587	13.683	15.239	8.976	9.774	15.328	18.114	21.388	13.198	37.993	12.175	14.95	18.727	13.026	19.646	27.33	11.254	19.194	20.372	15.158	12.925	36.438	17.064	17.354	17.664	18.834	17.507	15.311	22.908	19.916	14.054	11.735	11.761	8.637			363.81	7.921	13.481	15.926
365.714	8.803	10.248	15.264	15.845	8.726	15.024	17.109	13.594	17.134	28.826	13.307	16.491	8.057	9.461	15.562	17.451	19.859	12.77	33.932	12.763	15.912	18.3	13.705	19.563	26.398	11.598	27.989	19.862	15.158	12.779	33.809	17.173	18.052	17.401	18.886	18.128	12.824	23.336	18.723	13.577	11.121	10.897	9.204			365.714	7.595	15.407	20.203
367.619	8.417	10.124	14.654	16.298	8.502	16.496	18.389	14.118	16.512	28.261	13.362	16.681	8.592	9.395	15.139	17.118	18.482	13.214	30.622	12.623	16.321	19.345	14.788	18.797	26.216	11.221	38.301	19.468	16.526	12.881	32	17.468	17.74	23.139	18.653	18.46	12.932	23.143	19.655	13.506	11.857	10.842	8.771			367.619	7.321	16.753	20.79
369.524	8.18	10.292	14.207	16.095	8.083	17.52	18.263	14.029	17.354	27.62	14.04	16.436	9.63	9.095	15.423	17.114	18.424	12.805	28.331	12.754	15.906	18.318	14.442	18.867	25.455	11.057	34.204	20	16.825	12.881	32.798	17.838	18.583	24.591	19.277	18.199	13.243	22.885	20.345	14.25	12.5	12.185	8.541			369.524	7.628	17.605	17.327
371.429	8.759	9.672	14.779	17.321	8.137	16.317	16.851	13.271	24.024	27.707	14.327	15.497	9.687	9.288	15.832	17.37	19.329	13.578	26.845	12.43	16.094	16.536	14.218	19.506	25.705	10.836	24.634	20.106	16.474	13.412	37.629	18.039	20.083	19.022	19.022	18.175	14.892	23.005	19.555	13.929	11.787	11.897	8.586			371.429	8.257	16.58	15.597
373.333	8.702	9.015	15.218	16.964	8.253	16.203	16.583	12.629	24.098	26.924	13.442	15.368	8.962	9.481	15.942	17.886	20.965	14.812	24.959	11.746	15.629	16.891	13.833	19.329	26.102	11.049	19.376	20.043	16.211	13.663	38.517	18.033	19.26	17.927	18.897	18.223	16.662	23.276	18.697	13.774	11.022	11.929	9.643			373.333	7.878	13.883	15.208
375.238	8.425	9.759	15.3	16.321	8.715	16.87	16.594	13.365	17.561	28.12	14.412	16.098	9.133	9.049	15.569	18.244	19.929	15.019	24.689	11.667	15.17	17.473	13.564	20.367	25.955	11.664	25.054	20.415	15.825	13.299	34.685	18.139	18.292	17.401	18.299	17.417	16.149	23.152	18.025	14.25	11.074	12.315	9.745			375.238	7.71	12.469	15.055
377.143	8.289	9.657	21.593	15.952	8.596	16	16.2	13.629	18.11	28.576	14.367	16.172	9.038	9.058	15.642	18.041	19.094	15.419	24.703	11.623	15.371	17.7	13.962	20	26.614	11.41	33.398	21.106	15.404	12.881	36.281	18.226	18.229	17.102	18.299	17.284	16.095	23.152	18.109	13.381	11.011	11.451	9.115			377.143	8.055	10.938	14.761
379.048	8.627	9.416	24.939	15.857	8.639	15.959	16.623	14.424	20.305	28.326	14.337	16.485	8.867	9.646	16.511	17.972	18.906	15.147	24.264	11.588	14.585	17.827	14.583	17.88	26.216	10.943	35.258	21.745	15.281	13.439	40.213	18.025	20.625	17.496	19.402	19.706	16.716	23.295	19.092	13.625	11.254	11.707	9.42			379.048	8.271	11.037	15.22
380.952	8.513	9.65	19.582	17.274	7.982	17.577	16.657	14.471	20.866	27.902	14.563	16.798	9.161	9.3	16.628	18	19.753	14.585	24.378	12.246	14.497	18.709	14.282	17.791	26.239	11.336	31.333	22.074	15.702	14.259	37.888	18.042	21.115	17.504	18.882	20.834	16.797	22.783	19.462	15.524	12.044	11.766	9.414			380.952	7.959	11.259	15.115
382.857	8.478	9.708	16.15	17.024	8.202	16.797	16.166	14.053	18.707	28.489	13.915	17.258	8.806	9.317	16.54	17.752	21.188	14.69	23.568	12.649	15.365	19.582	13.84	18.633	27.591	11.541	25.409	21.457	17.211	14.425	38.157	18.07	18.823	16.394	18.229	19.479	15.459	22.972	19.227	15.071	12.654	11.489	8.707			382.857	7.662	10.537	14.94
384.762	8.447	9.46	15.521	16.726	8.91	16.293	15.371	13.353	16.415	28.576	13.181	17.65	8.972	9.358	16.416	17.801	20.741	14.792	21.784	10.596	14.811	17.673	14.224	19.392	26.784	10.803	21.151	20.702	17.439	13.752	40.652	17.538	18.385	16.38	18.339	19.028	14.122	23.797	19.521	14.113	12.217	11.951	8.369			384.762	7.935	10.321	15.229
386.667	8.491	9.547	16.371	21.357	8.7	16.301	16.806	12.547	17.037	27.543	13.508	18.748	9.384	9.621	16.197	17.772	21.541	15.243	21.973	10.351	15.761	16.864	14.34	18.494	26.125	11.279	19.441	21.83	16.123	13.286	36.73	17.379	19.302	17.044	18.609	19.237	14.081	23.949	19.84	14.369	11.312	12.484	9			386.667	8.384	10.321	15.845
388.571	9.11	9.847	15.661	26.155	8.531	16.984	18.423	13.141	29.049	28.902	14.482	18.902	9.408	10.066	15.73	16.988	22.071	15.281	22.581	11.711	16.415	18.218	14.096	17.759	25.432	11.328	20.075	22.128	15.596	12.952	33.506	17.691	19.667	17.292	18.38	19.597	14.568	23.742	19.824	14.482	11.401	12.31	9.057			388.571	8.518	10.179	15.573
390.476	8.943	9.277	15.179	23.274	8.596	19.089	17.857	13.306	27.439	27.913	14.246	18.509	9.848	9.872	16.153	17.585	21.459	14.882	22.399	11.728	15.899	18.4	13.987	18.158	25.591	10.607	21.828	21.245	16.754	12.748	34.09	17.643	18.76	17.745	18.443	19.934	15.811	23.691	18.983	14.964	11.779	11.761	8.586			390.476	8.257	10.228	15.506
392.381	8.333	9.474	15.7	17.988	8.964	21.366	16.206	12.759	15.671	27.533	14.226	18.319	10.412	9.942	16.336	18.069	20.153	14.195	21.493	11.491	15.233	17.818	13.756	18.791	27.227	10.656	21.086	21.032	18.088	13.5	35.854	17.766	17.958	17.839	18.395	19.749	16.541	24.051	19.765	14.804	11.272	11.826	8.637			392.381	8.084	10.062	15.284
394.286	8.11	10.372	15.364	15.714	9.17	24.805	16.309	12.847	16.195	29.609	14.136	17.712	9.839	9.675	16.555	17.793	19.412	14.089	21.135	12.254	14.704	17.373	14.647	18.5	27.682	10.918	20.333	21.649	17.088	13.69	34.169	18.34	18.948	17.715	18.749	19.483	15.878	23.724	20.538	14.042	11.011	11.902	9.178			394.286	7.681	10.784	14.671
396.19	7.754	10.285	14.507	14.94	9.032	23.74	16.92	12.888	16.488	28.283	13.191	18.319	9.299	9.469	16.905	17.533	19.4	14.748	21.486	11.325	15.27	16.909	14.545	18.032	27.136	10.746	20.882	22.989	16.877	13.259	41.944	17.432	18.833	29.577	18.081	18.654	15.338	23.106	18.731	12.881	10.846	11.022	9.51			396.19	7.88	11.068	14.687
398.095	8.092	10.102	14.789	14.5	9.209	20.683	16.886	13.235	17.305	25.598	13.101	19.755	9.678	9.955	16.431	16.618	19.506	15.121	21.25	11.272	15.277	18.5	13.25	19.525	26.5	11.328	20.796	23.064	16.807	13.507	45.326	16.816	17.375	41.088	17.653	18.768	16.189	22.594	18.975	12.839	10.743	11.31	8.994			398.095	8.254	10.154	14.683
400	9.039	9.956	15.157	15.083	9.09	20.089	16.983	13.912	17.11	26.12	14.603	20.601	10.071	10.132	16.066	16.923	19.894	15.169	22.047	13.184	15.006	19.918	14.186	20.291	27.705	12.402	21.172	20.755	17.246	14.048	37.517	17.524	18.208	29.971	19.037	19.199	15.905	23.373	18.824	14.107	11.254	11.777	9.363			400	7.76	9.895	14.749
401.905	9.206	10.467	15.661	14.464	8.733	18.008	17.137	14.335	17.695	28.12	14.814	20.19	9.645	10.128	15.825	18.492	22.718	15.22	22.466	13.167	15.069	18.591	14.468	19.892	27.966	11.451	21.333	19.745	17.789	13.867	35.27	18.117	19.719	18.175	19.317	18.602	16.811	24.276	18.193	14.845	12.261	12.457	10.076			401.905	7.6	10.167	14.862
403.81	9.053	10.993	16.204	14.821	8.866	16.748	17.297	13.912	17.488	30.174	14.296	18.804	9.825	9.79	16.307	19.236	23.012	15.518	22.074	11.921	15.138	17.464	14.058	18.62	28.568	10.992	20.215	21.234	18.667	13.18	33.461	18.482	19.448	18.905	19.435	17.867	17.797	24.313	18.58	14.554	11.93	12.603	9.344			403.81	7.667	15.648	14.637
405.714	8.627	10.511	15.507	15.429	9.087	16.675	15.989	13.306	16.878	29.489	14.789	18.129	10.384	9.099	16.241	19.028	20.976	15.802	21.169	11.351	14.937	17.255	13.346	17.715	27.67	10.992	19.978	21.606	18.719	13.646	35.09	18.407	18.552	19.365	19.646	18.213	16.743	24.138	18.244	14.536	11.276	11.772	9.344			405.714	7.806	19.58	14.625
407.619	8.575	11.197	15.071	14.536	8.928	16.61	15.949	12.959	16.622	29.087	14.452	17.147	9.72	9.49	15.555	18.524	20.553	15.879	21.007	12.018	15.491	18.464	13.397	18.481	27.58	11.262	20.473	21.319	17.316	13.782	35.618	17.83	18.51	19.175	19.295	18.431	14.176	23.346	18.513	13.351	11.397	12.13	9.803			407.619	7.777	17.543	14.625
409.524	8.772	11.153	14.532	13.44	7.848	16.602	16.457	12.241	16.183	30.109	13.588	16.472	9.573	9.823	15.401	17.545	21.118	15.361	20.041	12.342	16.044	19.173	14	18.614	28.045	11.213	19.226	21.702	17.772	13.265	34.393	17.187	19.167	18.496	18.878	18.626	13.324	23.654	18.824	13.226	10.754	11.88	9.204			409.524	7.516	17.154	14.857
411.429	8.715	9.905	14.161	13.833	7.917	15.561	15.777	11.929	16.646	29.391	13.402	16.245	9.521	10.066	15.314	17.089	21.235	15.064	18.973	12.842	15.484	18.318	13.237	17.639	27.045	10.934	20.28	21.755	17.474	13.463	36.764	17.276	19.375	16.314	18.258	18.986	15	24.677	18.958	14.72	10.985	11.299	8.924			411.429	7.516	17.667	14.983
413.333	8.693	9.752	15.3	15.202	8.823	14.528	15.811	12.2	17.402	29.772	14.05	15.178	9.464	10.638	15.328	17.565	19.388	15.585	19.858	13.307	13.969	18.273	14.256	16.823	26.943	11.213	20.323	21.798	17.667	13.908	36.854	17.323	19.625	22.613	18.487	19.303	15.095	24.134	18.597	14.827	10.776	11	9.306			413.333	7.357	18.352	14.797
415.238	8.425	9.985	15.4	15.81	8.957	15.309	16.577	13.224	16.805	30.25	14.789	16.025	9.697	10.333	15.803	17.919	19.518	15.735	21.054	12.333	15.296	17.718	14.821	18.816	26.693	10.615	18.742	22.33	18.018	13.833	33.944	17.557	19.938	26.679	19.052	19.393	14.662	23.35	18.975	14.214	10.768	12.152	9.013			415.238	7.635	17.5	14.47
417.143	8.237	10.277	14.943	15.5	9.054	16.366	16.223	13.718	16.744	28.848	14.784	17.644	9.038	9.971	15.124	18.415	20.741	15.722	21.493	11.974	16.579	17.245	14.891	18.937	26.489	10.615	20.409	22.596	18.632	13.619	35.393	17.942	19.812	31.672	19.015	19.46	14.095	23.65	19.983	14.119	10.879	12.663	8.758			417.143	8.022	18.142	14.129
419.048	9.088	10.599	15.5	14.94	9.126	15.919	16.429	13.812	17.951	29.543	14.407	18.859	8.621	10.272	15.606	18.776	21.047	15.166	20.73	14.035	15.358	18.327	15.538	17.133	27.114	11.451	20.527	22.649	18.526	13.548	35.854	17.577	20.875	38.81	19.387	19.294	14.797	24.447	20.58	14.119	10.735	11.582	9.159			419.048	8.573	18.506	14.558
420.952	9.048	10.423	15.421	14.738	8.43	16.016	16.709	13.106	17.329	30.696	14.593	19.399	9.318	10.066	16.562	17.667	21.224	14.642	20.243	13.807	15.673	19.627	14.551	18.38	27.636	11.189	19.527	23.149	18.018	13.605	34.461	17.07	20.667	27.796	19.753	19.754	16.892	25.419	19.487	13.345	11.555	10.853	9.21			420.952	8.345	15.469	14.745
422.857	8.798	10.861	15.196	14.19	7.458	16.13	16.314	12.618	16.805	29.217	14.91	20.294	10.166	9.506	16.226	17.159	20.459	14.671	19.507	11.921	15.868	18.182	13.474	18.728	28.455	10.582	19.559	21.755	17.719	12.769	34.371	16.955	19.729	18.007	19.148	20.095	16.041	24.756	18.252	13.482	11.132	10.293	9.006			422.857	7.938	15.802	15.63
424.762	8.811	10.657	14.207	14.69	7.419	15.252	16.251	13.847	16.427	31	14.246	19.742	10.161	9.642	16.277	18.053	20.118	14.53	19.311	12.377	14.277	17.464	13.846	17.981	29.034	11.148	19.753	20.17	17.579	12.259	34.371	17.34	18.969	18.569	18.631	19.412	16.014	23.797	19.092	13.542	10.864	10.788	9.121			424.762	7.825	17.414	21.589
426.667	8.202	10.657	14.118	16.226	7.798	15.081	16.451	14.059	17.476	31.946	14.106	18.331	9.758	10.004	15.35	18.866	19.318	14.371	19.432	12.939	14.597	17.836	13.654	17.797	27.33	11.221	18.677	19.755	17.965	12.84	35.124	17.493	19.073	18.883	18.314	19.905	16.23	24.083	20.244	13.554	10.853	11.967	8.924			426.667	7.369	15.123	26.05
428.571	8.184	11.248	14.654	17.262	8.123	15.415	16.537	12.994	19.634	29.402	14.236	17.479	9.455	9.568	14.701	18.211	19.259	14.751	20.054	12.035	16.182	18.064	13.25	17.93	26.955	11.025	18.086	20.702	16.404	12.697	34.517	17.284	20.021	18.474	18.317	20.455	14.419	23.977	20.067	13.47	10.169	12.103	8.892			428.571	7.803	12.21	23.84
430.476	8.061	11.102	13.961	17	7.625	15.39	16.451	12.535	17.72	27.902	14.322	15.638	9.882	10.066	15.949	17.504	20	15.173	19.676	11.614	14.723	19.173	13.974	19.171	26.705	11.098	18.731	20.883	15.842	13.286	33.146	17.997	19.698	17.387	18.764	20.384	14.135	22.903	20.563	14.321	10.912	11.788	9.783			430.476	8.508	11.006	21.94
432.381	8.355	10.92	14.011	15.655	7.466	15.894	17.109	12.871	15.793	29.283	14.543	16.436	10.166	9.955	16.394	18.098	21.282	15.01	18.27	11.86	14.145	19.364	14.795	19.291	26.909	11.549	19.194	22.723	18.368	13.854	32.135	18.343	20.146	17.679	19.125	19.986	14.23	23.152	20.462	15.143	11.478	12.326	9.815			432.381	8.012	10.278	22.549
434.286	8.741	11.555	15.396	15.464	7.942	15.748	17.531	13.806	16.939	30.88	14.492	17.761	9.877	9.062	16.401	17.886	21.918	14.377	18.412	12.184	16.409	18.191	15.231	18.627	27.977	11.984	19.72	23.734	18.509	13.378	34.169	18.404	19.542	24.942	18.893	19	14.27	23.355	19.118	13.583	11.029	12.668	9.936			434.286	7.283	10.117	22.79
436.19	8.513	11.277	15.35	15.655	7.318	14.756	16.88	13.165	34.732	29.293	14.045	17.307	9.412	9.156	16.832	17.618	20.129	14.62	19.453	12.193	17.088	17.545	14.897	18.443	27.352	10.508	19.28	20.596	17.368	13.714	34.528	18.345	19.635	24.628	18.852	18.711	14.743	30.134	18.252	12.571	10.864	11.87	9.611			436.19	7.211	10.321	20.99
438.095	8.557	10.854	14.789	15.667	7.693	14.764	15.88	12.488	34.756	27.283	14.658	16.699	9.493	8.955	16.212	18.142	19.129	15.045	20.426	12.544	15.346	17.655	15.026	18.158	27.455	9.73	20.43	18.936	17.684	13.507	32.258	18.014	20.594	17.372	18.9	18.934	15.378	38.488	17.958	12.327	11.169	11.027	9.618			438.095	7.084	10.346	19.473
440	8.061	11.212	14.779	14.429	8.105	15.228	16.406	13.059	17.049	27.457	14.819	16.411	9.711	9.708	15.803	18.215	19.365	14.815	19.682	12.307	14.849	18.518	14.667	18.57	26.67	10.738	20.849	19.149	17.421	12.578	31.831	17.49	19.667	20.679	17.919	18.161	16.689	32.438	19.336	12.167	11.25	11.174	9.057			440	7.106	9.938	19.42
441.905	7.768	10.117	14.254	14.083	7.668	15.333	15.583	12.988	16.402	27.707	12.925	16.92	9.54	9.967	16.474	17.866	20.059	14.514	19.25	11.851	15.283	18.891	13.199	17.525	27.034	10.049	18.839	19.351	16.386	12.32	33.876	17.27	17.927	21.46	18.059	17.863	16.027	24.304	19.697	13.113	11.099	11.418	8.28			441.905	7.185	9.821	23.131
443.81	8.035	10.204	14.007	14.762	7.791	16.22	15.411	12.994	16.28	26.25	12.985	16.479	9.739	9.86	15.81	18.61	20.506	14.029	19.405	12.088	14.415	18.591	12.353	17.715	27.432	10.672	18.247	20.947	16.351	12.612	34.146	17.708	19.042	23.051	19.007	18.019	14.932	24.484	18.756	14.167	11.386	11.962	8.427			443.81	7.146	10.29	24.735
445.714	8.206	10.774	13.818	15.012	7.729	16.26	16.183	13.218	15.561	26.12	14.337	15.828	9.943	9.918	14.978	18.878	21	13.812	19.115	11.465	14.396	18.4	13.308	18.987	26.67	11.82	20.667	21.436	17.632	12.541	32.989	18.212	20.75	24.825	19.244	18.346	15.662	24.908	19.471	14.512	11.482	12.25	8.166			445.714	7.412	10.506	20.286
447.619	8.018	10.248	13.868	15.393	7.83	15.927	16.783	13.288	23.305	27.098	14.196	14.877	10.284	9.56	15.774	18.268	21.235	14.262	18.784	12.167	15.088	18.309	13.205	19.038	27.42	10.689	21.688	20.915	18.035	12.575	34.146	18.12	19.615	20.248	18.76	19.185	15.135	23.834	19.193	13.935	11.324	12.37	9.248			447.619	7.835	11.068	17.363
449.524	8.105	10.285	14.175	14.583	7.646	15.821	17.697	12.653	25.622	27.837	13.538	15.086	10.512	9.403	15.839	18.35	21.6	14.649	18.209	12.623	14.057	17.227	13.327	17.994	27.568	9.869	19.538	20.128	17.965	12.891	34.562	17.384	18.729	18.175	18.963	19.384	13.959	24.364	17.916	14.083	11.092	12.283	9.898			449.524	8.158	17.796	16.649
451.429	8.294	10.146	14.346	14.429	7.621	15.073	16.577	12.712	17.988	28.337	14.201	15.982	10.223	9.42	16.263	18.264	20.776	14.022	18.676	12.693	14.264	17.191	14.25	17.557	26.511	10.82	18.387	19.181	16.737	13.388	34.27	18.067	19.354	18.584	19.683	19.346	15.095	24.263	19.37	14.179	11.276	11.299	9.229			451.429	8.233	21.654	15.852
453.333	8.149	9.985	14.296	15.464	7.986	16.008	16.434	13.335	18.146	27.543	15.01	16.11	9.299	9.568	16.263	18.423	20.012	13.623	19.182	13.351	15.912	19.064	14.385	17.684	27.045	11.156	18.914	19.713	17.281	13.976	34.326	18.446	20.281	18.511	19.24	18.972	16.878	23.756	18.958	14.393	11.54	11.609	8.758			453.333	7.947	17.512	16.148
455.238	8.189	10.912	14.279	14.81	8.105	18.081	16.863	13.547	20.11	27.837	14.543	16.896	8.867	9.502	14.92	17.988	19.412	13.994	18.622	12.044	16.025	18.155	14.558	17.316	27.966	10.984	19.065	20.351	17.596	13.15	34.011	17.513	19.26	17.978	18.251	19.024	16.189	23.576	18.193	14.56	10.893	12.033	8.127			455.238	8.07	15.278	15.537
457.143	8.482	11.27	14.346	14.75	7.982	18.138	16.486	13.294	16.927	28.228	14.101	16.479	9.502	9.667	15.664	17.667	19.553	14.687	17.622	11.711	14.887	17.645	14.712	17.69	27.818	11.705	20.054	20.415	18.105	12.81	33.202	16.994	18.833	18.307	18.373	19.038	14.838	23.788	19.101	14.72	10.643	12.033	7.624			457.143	8.376	17.383	14.305
459.048	8.939	10.745	14.621	15.631	7.469	17.602	16.331	12.8	14.805	27.207	14.286	15.926	9.825	9.514	15.847	17.882	19.588	14.565	18.23	12.579	14.428	18.564	14.013	18.576	29.136	11.098	20.387	19.851	19.018	12.891	33.506	17.886	17.958	17.737	18.292	19.194	14.973	24.184	18.79	14.958	11.515	11.582	8.121			459.048	7.647	20.21	15.191
460.952	8.807	11.036	21.282	15.012	7.462	17.984	16.417	13.435	17.11	27.207	15.307	15.558	9.943	9.292	15.307	17.801	19.753	14.042	19.878	13.07	14.969	19.091	13.577	18.544	27.58	10.689	20.677	19.989	18.895	12.517	36.101	18.184	17.875	17.533	18.683	19.284	15.784	24.406	18.857	14.708	11.257	11.582	9.038			460.952	7.254	18.691	20.768
462.857	8.566	11.161	26.15	14.643	7.765	20.073	17.28	14.159	16.646	29.783	15.683	14.914	9.147	8.967	15.891	18.439	20.894	14.121	20.189	12.368	15.321	19.691	13.66	18.38	25.295	10.566	21.151	20.223	38.263	13.248	35.91	17.217	19.896	18.35	19.535	19.062	16.081	24.249	19.084	14.31	11.118	12.06	8.554			462.857	8.014	15.377	22.995
464.762	8.987	11.234	21.561	15.655	8.329	22.528	17.183	13.806	16.659	29.87	14.834	14.926	8.569	9.58	15.832	19.309	21.271	14.607	19.703	12.123	15.591	19.3	14.231	17.873	26.784	10.295	19.516	21.426	37.877	13.823	33.27	17.022	19.281	18.723	18.738	18.967	15.878	23.382	19.252	13.714	11.173	11.549	8.777			464.762	8.391	13.198	19.752
466.667	9.364	11.241	18.068	16.512	8.455	25.512	16.566	13.1	18.183	28.761	14.271	14.896	9.033	10.374	15.978	19.297	21.2	15.125	19.966	12.474	15.39	18.318	14.904	17.152	29.318	10.893	18.473	21.84	18	13.34	33.022	17.387	19.698	18.752	18.247	19.128	15.595	22.94	20.008	14.53	11.386	11.516	9.764			466.667	8.259	12.056	17.675
468.571	8.811	10.796	17.368	15.833	8.347	30.512	16.543	13.729	18.293	28.37	14.307	15.35	9.706	10.21	16.584	18.24	21.4	15.335	20.405	12.044	14.692	18.718	14.295	18.392	28.636	11.803	18.774	21.426	18.404	13.384	33.382	17.613	20.26	17.745	18.69	19.697	14.986	24.18	20.546	14.637	12.235	11.766	9.344			468.571	8.153	11.488	16.033
470.476	8.465	10.774	17.096	14.964	8.097	31.333	16.949	14.635	18.573	27.913	14.819	16.288	10.355	10.144	17.328	18.654	22.8	15.054	20.169	12.325	14.824	19.227	14.699	18.88	26.977	11.852	18.409	21.34	18.561	13.963	34.315	17.777	18.438	16.336	19.236	19.588	13.568	24.18	19.613	14.643	12.346	12.457	9.554			470.476	8.125	11.006	15.604
472.381	9.158	10.978	16.243	16.107	7.953	27.764	17.08	15.441	18.378	29.793	15.693	15.601	10.19	9.889	17.204	19.187	23.059	15.128	19.885	11.789	15.245	19.118	14.654	18.165	27.989	12.033	17.806	20.713	18.456	13.83	35.933	17.791	18.844	17.358	19.694	19.365	14.324	24.696	18.143	15.137	12.173	13.174	9.758			472.381	7.998	10.309	15.115
474.286	8.829	11.175	15.45	16.69	8.354	25.041	16.194	14.788	17.963	29.793	15.864	15.178	10.081	10.062	17.679	18.537	22.059	15.466	19.953	11.939	15.906	18.8	15	18.62	31.239	12.27	19.172	21.968	18.842	13.663	34.91	18.329	20.198	18.803	19.952	20.033	17	26.143	18.37	15.381	12.478	12.495	9.885			474.286	7.909	10.377	15.222
476.19	8.215	11.314	17.575	16.167	8.513	21.935	15.726	13.682	17.402	28.815	15.211	15.479	10.09	10.671	17.511	18.939	22.376	14.776	20.453	13.044	15.799	19.209	15.397	26.5	31.193	12.172	20.237	22.862	18.404	14.228	32.742	19.148	19.75	18.92	19.483	19.678	16.811	25.166	19.882	15.286	12.324	11.625	9.707			476.19	7.95	10.401	14.842
478.095	8.851	11.307	22.368	16.274	8.318	19.268	16.651	13.518	17.756	29.674	14.94	15.613	10.867	10.16	16.248	18.813	22.835	14.425	20.291	13.36	15.723	19.182	14.949	29.177	29.375	12.156	20.323	21.904	18.404	14.585	32.281	19.451	19.979	17.971	18.653	19.796	17.824	24.23	20.874	15.19	12.158	11.962	9.121			478.095	8.072	10.259	14.78
480	9.346	10.971	22.186	16.238	8.542	18.528	17.406	13	18.183	30.304	14.91	15.957	11.109	9.963	15.781	18.833	22.529	14.581	19.574	13.368	16.44	20.136	14.795	22.905	28.5	11.787	20.591	22.394	17.421	13.908	32.101	19.32	21.115	17.577	18.399	19.393	20.122	24.442	20.168	15.012	11.949	11.821	9.535			480	7.952	10.778	15.029
481.905	9.452	10.577	18.15	16.31	8.625	16.87	16.829	13.4	18.256	29.261	15.106	15.785	10.161	10.947	15.518	19.593	22.835	14.498	19.959	12.974	16.447	20.073	14.788	20.044	28.057	11.057	19.473	23.34	16.491	13.146	31.865	18.173	19.677	18.555	18.524	17.588	18.459	24.456	18.992	14.256	11.335	11.446	9.656			481.905	7.739	10.753	14.928
483.81	9.285	10.664	16.404	16.333	8.105	15.959	16.897	13.712	19.61	28.783	15.261	15.368	10.024	10.523	15.745	18.894	23.424	13.968	19.791	12.921	16.296	17.991	15.577	18.987	28.364	11.295	17.946	22.16	17.263	13.201	30.528	17.487	18.115	19.19	19.177	17.796	18.689	24.654	19.487	14.726	11.386	12.603	9.873			483.81	7.772	10.284	15.372
485.714	9.202	10.62	15.875	16.226	8.419	17.48	17.714	14.059	19.22	28.75	14.337	15.583	10.308	10.045	15.547	18.26	24.176	13.479	19.385	13.272	15.836	18.264	14.641	18.608	27.409	11.025	18.688	20.851	18.772	12.823	29.933	17.855	18.375	18.409	19.771	18.972	22.203	24.696	20.42	14.685	11.062	12.63	9.847			485.714	7.523	9.796	14.561
487.619	8.798	9.964	15.482	15.393	8.249	16.642	17.137	14.435	17.768	29.011	13.97	15.595	10.123	9.7	15.759	17.988	23.682	13.422	19.561	13.053	15.025	19.745	14.071	17.778	27.045	10.885	19.667	20.723	18.263	12.48	31.438	17.318	19.042	18.08	19.716	19.355	22.081	23.152	20.134	13.619	10.71	11.668	9.217			487.619	7.789	10.049	14.733
489.524	8.132	9.971	14.943	15.583	8.004	14.407	16.949	14.576	17.585	29.489	14.869	15.282	9.758	9.848	17.109	18.65	22.588	13.323	19.149	12.754	15.73	19.664	13.737	17.203	27.193	11.951	18.161	21.106	17.421	13.412	33.944	17.345	18.823	19.263	18.601	18.55	19.541	24.069	20.328	13.821	11.515	12.418	9.051			489.524	8.098	10.216	15.057
491.429	8.298	9.861	15.225	16.226	8.448	15.252	17.863	14.282	17.549	27.62	15.492	14.804	10.445	10.193	17.036	18.967	22.2	13.272	18.851	12.982	15.881	19	13.372	16.595	28.398	12.066	17.376	21.447	17.228	14.5	34.539	18.223	19.083	23.022	18.432	18.829	19.216	25.714	19.958	13.452	12.423	12.527	9.363			491.429	8.134	16.858	14.964
493.333	8.693	10.307	15.832	16.25	8.639	16.732	17.109	13.347	18.024	26.783	15.749	14.472	10.55	9.609	16.292	17.992	22.788	13.911	19.514	11.912	15.503	19.164	15	18.184	29.227	11.73	19.108	22.149	17.86	14.371	32.27	18.173	19.719	23.212	19.609	19.118	18.5	24.581	19.756	13.976	12.118	12.136	10.013			493.333	8.204	22.691	15.511
495.238	8.851	10.942	15.882	16.286	8.166	15.748	16.806	13.671	18.049	29.641	15.492	14.699	9.559	9.749	17.131	18.817	23.282	14.802	19.946	11.904	16.459	19.882	15.263	18.861	29.932	12.705	18.968	21.245	19.895	13.582	33.573	17.655	19.625	19.197	20.173	18.697	18.689	24.3	19.924	15.25	11.702	12.25	9.803			495.238	7.94	18.235	14.986
497.143	8.991	10.299	20.375	15.952	7.747	15.366	17.234	14.612	18.256	31.337	15.136	15.896	9.502	10.35	17.08	19.646	23.106	15.569	18.757	13.202	16.377	20.345	14.872	17.475	28.307	13.393	18.215	20.319	20.491	13.289	35.854	17.827	18.896	17.299	19.609	18.716	18.946	24.774	19.168	14.399	11.68	11.793	8.949			497.143	7.782	14.475	14.89
499.048	8.781	9.321	23.071	15.167	7.989	16.878	17.006	14.065	19.512	32.924	14.925	15.847	9.635	10.831	17.307	19.683	23.412	16	18.101	12.877	15.057	20.064	14.737	18.424	27.273	12.574	18.355	20.798	19.263	13.333	35.247	18.343	18.125	17.562	19.38	19.791	18.189	24.76	18.672	14.411	11.629	11.75	9.204			499.048	7.789	13.691	14.831
500.952	8.539	9.883	19.796	15.524	8.354	17.894	16.509	13.394	19.854	39.12	16.08	15.049	9.938	10.407	17.993	19.943	23.682	15.268	18.926	12.5	14.943	19.318	14.237	18.975	29.25	11.197	19.086	21.383	19.07	13.616	34.685	18.54	18.031	17.431	20.498	20.047	18.486	24.843	19.269	15.048	11.235	11.853	9.401			500.952	7.892	12.568	16.757
502.857	8.706	10.606	17.589	16.667	8.56	17.894	16.32	13.888	19.037	49.011	15.935	15.117	10.242	9.975	17.818	19.736	22.953	14.364	18.966	12.184	15.415	18.791	14.276	18.835	28	14.197	19.118	20.521	18.404	13.704	33.202	18.518	18.385	17.985	19.867	18.995	17.743	24.387	20.622	14.881	11.794	12.598	9.465			502.857	8.273	11.71	18.544
504.762	8.93	10.54	16.45	15.905	8.78	21.089	17.109	14.459	17.549	55.489	16.518	15.896	10.441	9.605	17.657	18.346	20.824	13.831	20.182	12.088	15.83	19.1	14.814	19.158	25.727	18.713	18.925	20.596	18.719	13.449	32.865	18.368	18.74	29.35	19.546	19.536	18.486	24.986	20.319	14.952	12.904	13.027	10.656			504.762	8.237	11.654	17.408
506.667	8.991	10.474	16.136	16.298	8.661	27.772	17.537	15.371	17.451	55.304	16.613	16.896	10.355	9.333	16.942	17.593	19.753	13.776	19.973	12.281	15.642	19.409	14.962	18.424	28.102	19.943	18.903	21.713	19.263	13.701	32.809	18.318	18.406	42.088	19.705	19.626	21.432	25.083	19.798	15.482	12.11	12.533	10.656			506.667	8.022	11.321	16.167
508.571	8.504	10.606	15.189	16.69	8.202	28.724	17.246	14.512	17.524	50.576	15.236	16.528	9.877	9.317	16.438	18.711	22.4	13.511	18.115	11.781	15.296	19.082	13.923	18.108	30.466	20.377	18.731	19.83	18.509	14.507	32.247	18.279	18.344	37.285	20.018	19.678	21.527	25.037	20.336	15.536	11.438	11.62	10.032			508.571	8.127	10.494	15.687
510.476	9.189	11.569	15.004	16.167	8.235	25.667	16.846	13.212	19.183	47.935	15.457	16.436	10.592	9.494	16.912	19.764	24.459	12.812	19.047	11.939	15.585	19.373	13.84	17.772	29.102	20.828	19.161	20.968	17.439	14.673	31.944	18.443	19.583	25.985	20.177	19.649	20	24.77	20.017	14.131	11.967	11.005	9.975			510.476	8.026	10.056	17.893
512.381	9.855	11.182	14.825	15.595	8.39	24.13	15.571	14.553	19.085	48.163	15.894	16.38	12.73	10.144	17.453	19.228	22.494	13.182	19.662	13.018	15.642	20.327	15.558	17.475	28.591	20.803	19.258	21.915	18.912	13.901	32.517	18.666	20.812	20.27	19.266	19.294	18.068	25.447	19.613	13.702	12.029	11.185	9.764			512.381	7.861	10.395	18.816
514.286	9.5	10.832	14.554	14.155	8.289	21.756	15.817	14.471	16.744	49.489	15.698	16.245	13.209	9.852	16.547	19.037	20.988	13.728	19.351	13.851	15.629	19.345	16.013	17.532	29.125	18.795	19.763	21.053	19.667	13.942	31.831	18.635	19.49	17.964	19.358	19.336	17.5	28.447	19.345	14.042	12.434	11.484	9.879			514.286	7.849	10.698	17.353
516.19	9.25	10.985	15.396	14.917	7.729	18.967	17.486	12.894	17.305	53.13	15.362	17.018	11.701	9.708	15.635	19.459	21.835	14.22	18.041	12.772	15.151	18.082	14.763	17.259	28.625	15.959	19.591	21.021	16.018	13.776	32.056	17.961	18.01	18.372	19.421	19.81	19.365	38.783	19.227	14.167	12.489	11.342	9.573			516.19	7.957	11.043	17.327
518.095	8.741	10.723	15.593	15.333	7.271	17.317	17.783	13.318	19.524	54.022	15.658	19.767	12.052	10.247	15.657	19.073	21.988	15.147	17.682	12.149	15.799	18.655	14.16	16.867	28.25	13.254	19.226	20.415	16.035	12.952	34.236	17.677	18.99	17.606	18.469	19.63	18.743	45.719	20.008	14.583	11.423	11.103	9.79			518.095	8.408	11.92	19.506
520	8.439	11.328	15.807	14.94	7.823	16.26	16.594	14.276	19.061	52.946	15.568	21.215	13.545	10.671	16.745	18.614	22.035	15.949	18.23	12.877	16.302	20.673	14.897	16.861	28.682	13.082	18.301	21.096	18.263	13.031	32.371	18.05	19.125	17.431	18.303	19.071	20.243	40.811	19.866	14.262	11.518	12	10.172			520	9.079	12.401	19.637
521.905	9.101	11.964	16.532	14.226	8.523	16.602	16.674	14.188	18.317	49.707	16.156	18.012	14.545	10.588	17.708	18.638	23.4	16.645	18.689	13.342	15.654	21.573	14.872	17.848	30.25	13.279	18.452	22.755	19.211	13.527	31.382	18.513	18.917	18.124	18.989	19.057	20.946	33.894	20.05	14.881	12.026	12.266	10.65			521.905	9.266	18.691	17.298
523.81	9.417	11.708	16.693	14.738	8.708	16.772	17.651	14.029	19.146	47.25	15.799	16.153	13.517	10.519	17.409	19.248	23.565	16.687	20.716	13.386	15.547	19.991	14.25	18.006	31.227	12.934	19.097	23.521	18.351	14.265	30.933	18.262	19.354	19.971	19.424	18.616	19.622	32.834	19.773	14.899	12.136	11.94	10.478			523.81	9.185	22.87	17.174
525.714	9.412	11.81	16.079	16.476	8.592	16.667	16.891	13.624	19.537	50.152	15.824	16.571	11.787	10.029	16.869	19.711	22.918	16.198	20.345	12.64	15.396	19.2	14.91	18.139	29.989	12.77	19.194	23.245	19.193	14.245	31.618	17.574	18.677	20.358	18.808	18.967	19.527	33.571	19.622	14.274	12.294	12.5	9.096			525.714	9.077	18.809	17.649
527.619	9.425	11.109	15.336	16.464	8.347	15.764	16.794	14.024	19.22	47.609	16.377	16.307	11.052	9.922	16.708	19.069	22.388	15.767	18.669	12.167	15.604	19.355	15.026	17.867	27.795	11.984	18.892	21.989	31.123	14.024	34.225	17.465	18.896	19.314	18.31	19.166	19.189	30.922	20.353	14.435	12.026	12.005	9.178			527.619	8.693	17.253	22.461
529.524	9.018	10.62	15.282	16.786	8.245	15.26	16.84	14.441	17.598	42.609	16.548	16.092	10.479	10.436	16.569	18.211	22.235	15.032	19.23	12.035	15.906	18.918	14.885	17.272	26.693	11.918	18.548	20.181	30.579	14.034	33.506	17.925	18.417	18.993	19.399	18.294	19.919	29.465	18.832	14.31	11.798	11.364	10.038			529.524	8.391	19.043	26.346
531.429	9.057	10.518	15.389	16.417	8.347	16.325	15.709	14.006	18.378	39.837	16.206	16.374	10.474	10.498	15.956	18.732	24.494	15.367	18.736	12.509	15.591	18.745	13.974	17.43	28.182	12.049	20.215	21.936	18.421	13.459	34.191	17.755	17.917	17.993	19.934	18.635	19.257	27.484	18.21	15.167	11.688	11	9.822			531.429	8.59	20.16	22.964
533.333	9.189	10.088	14.8	14.679	7.877	15.862	15.834	14.159	19.451	37.011	16.744	15.571	9.796	9.979	15.321	18.809	27	15.901	18.311	12.904	14.937	17.373	12.731	17	29.364	11.385	20.28	22.298	21.754	13.044	37.011	17.674	17.76	17.292	19.701	19.081	18.824	27.235	19.034	15.113	11.25	11.109	9.879			533.333	8.683	18.377	19.301
535.238	8.645	9.788	14.679	15.202	7.437	14.407	15.423	13.988	17.756	36.304	17.141	15.067	9.265	9.535	15.285	18.699	26.906	15.284	18.27	12.974	14.66	17.082	13.244	17.418	28.42	10.885	18.613	20.638	22.86	12.918	36.146	18.17	17.448	27.54	19.642	18.758	17.797	27.876	19.16	14.167	11.114	11.277	10.28			535.238	8.837	16.79	17.36
537.143	8.456	11.117	15.264	16.429	7.679	13.902	14.92	14.176	18.451	35.033	17.427	15.337	9.919	9.687	15.591	19	26.694	14.875	19.034	12.395	14.906	18.791	14.545	18.677	28.216	11.049	19.032	19.798	17.842	12.187	33.584	17.925	18.354	41.993	18.72	18.777	15.149	27.212	19.059	13.613	11.268	11.576	9.344			537.143	8.998	16.944	16.403
539.048	8.276	11.314	14.8	15.583	7.65	15.089	15.034	13.529	19.634	33.141	17.251	14.583	10.066	9.329	15.27	19.069	26.694	14.61	19.608	12.035	15.226	19.1	15.006	18.139	28.193	12.279	18.344	19.543	16.386	11.813	33.326	17.359	20.938	31.847	18.613	18.469	14.297	27.24	18.034	13.929	11.018	12.293	8.694			539.048	8.631	18.537	15.644
540.952	8.25	10.073	14.707	15.548	7.993	15.78	16.503	12.865	19.707	30.337	16.995	14.589	9.502	9.782	15.431	18.992	26.835	14.633	20.088	12.737	15.975	18.527	14.314	18.905	26.92	13.18	18.903	22.287	16.316	13.058	33.775	17.337	21.198	17.584	19.823	18.687	15.324	27.502	18.193	14.53	11.114	12.125	9.42			540.952	8.211	18.327	15.095
542.857	8.943	10.46	15.675	16.19	8.271	14.886	17.229	13.329	20.927	28.88	16.533	15.012	9.275	9.733	16.036	18.801	26.106	14.284	19.885	14.035	15.704	18.836	14.16	19.367	26.83	12.68	19.957	22.064	18.14	13.769	33.944	17.279	19.49	17.051	19.723	18.251	19.595	26.843	19.605	13.768	11.592	11.565	9.752			542.857	8.463	14.932	14.945
544.762	8.947	10.54	15.907	15.893	7.874	15.642	17.371	13.559	20.415	27.957	15.92	15.196	9.744	9.58	16.891	19.703	25.906	14.137	18.892	14.465	15.686	18.564	14.224	19.165	28.284	12.885	20.301	19.33	19.491	13.378	32.348	16.975	20.198	17.642	19.937	18.588	20.189	25.783	19.471	14.107	11.555	11.495	9.293			544.762	8.763	12.512	14.986
546.667	8.785	10.81	15.979	14.036	7.877	16.073	18.183	13.706	19.317	26.815	16.533	16.258	9.81	10.387	16.117	19.183	27.188	15.006	18.993	14.395	16.101	17.982	14.609	19.133	28.534	17.23	19.677	20.809	18.789	13.922	30.708	17.351	18.865	17.022	19.343	19.123	18.162	24.309	18.866	14.756	11.368	11.527	9.433			546.667	8.463	12.068	15.031
548.571	8.846	11.197	15.196	14.179	7.996	15.528	16.749	13.476	18.988	26.576	16.256	16.626	9.872	10.3	15.803	17.866	27.835	15.751	18.466	13.009	16.088	18.491	14.276	18.759	30.205	20.877	17.817	20.489	18.965	14.221	30.101	18.189	17.458	17.526	18.808	18.673	16.973	24.092	17.924	14.833	11.919	11.636	9.86			548.571	8.53	11.932	15.017
550.476	8.961	11.241	14.225	19.524	8.617	16.626	16.84	13.859	19.793	25.848	16.075	15.374	9.991	9.868	16.912	18.073	27.753	15.78	18.135	12.632	15.698	18.173	13.686	19.165	30.943	19.664	18.237	19.883	21.053	13.861	30.539	17.755	19.979	19.073	19.768	19.464	16.405	24.152	18.429	15.958	11.941	12.728	9.675			550.476	9.17	10.951	15.189
552.381	9.737	11.438	14.786	25.19	9.069	17.764	17.617	14.682	20.78	25.783	16.769	14.883	10.005	9.58	16.774	19.138	24.812	15.498	18.189	14.149	15.994	18.582	14.968	18.443	30.5	17.418	19.065	21.532	20.825	13.956	33.045	17.635	20.031	19.533	20.173	18.943	17.324	23.797	19.924	16.387	11.941	12.989	9.847			552.381	9.317	11.056	16.107
554.286	9.189	10.883	15.586	24.107	8.736	17.512	16.657	14.976	20.695	26.293	17.658	15.472	10.009	9.811	16.693	19.622	22.235	15.61	18.932	13.798	16.371	21.1	15.115	18.557	29.136	14.795	19.108	21.574	18.404	14.248	34.146	18.072	18.823	18.869	20.155	18.54	18.378	23.548	28.983	15.464	11.915	12.092	10.159			554.286	9.35	11.235	16.401
556.19	8.417	11.022	15.461	24.976	8.451	19.756	16.2	14.359	19.707	25.957	17.307	15.883	9.735	9.951	16.328	19.244	23.576	16.572	19.595	13.5	16.629	21.509	15.006	19.158	29.716	13.475	20.043	22.213	18.842	13.929	33.955	17.886	19.552	18.197	20.044	19.156	18.243	23.641	39.899	14.762	12.559	12.234	10.051			556.19	9.544	10.827	15.847
558.095	9.224	11.401	15.368	28.167	8.798	23.073	15.783	13.776	18.207	26.598	17.186	15.571	9.972	10.008	17.036	19.467	25.482	16.927	20.25	13.474	16.465	21.109	15.378	18.918	29.034	13.09	20.194	22.734	19.14	13.67	34.562	18.128	19.073	19.314	19.978	19.673	17.932	23.774	43.176	14.643	12.982	12.761	10.268			558.095	8.959	11.019	15.807
560	9.395	11.088	15.318	23.798	8.888	23.74	16.674	14.018	17.329	26.804	17.899	15.491	9.673	10.169	17.35	19.22	25.153	15.744	20.77	13.044	15.629	20.382	15.019	18.937	28.125	13.451	18.559	21.298	17.807	14.276	33.225	18.354	17.875	19	19.701	18.957	20.095	22.922	42.731	14.863	12.007	12.918	9.51			560	8.808	11.531	16.1
561.905	9.202	11.204	14.825	24.143	7.953	26.48	17.269	14.435	17.89	25.859	18.774	15.601	9.825	10.086	17.197	18.675	24.306	15.157	19.338	13.035	15.138	19.855	15.404	19.386	29.614	12.508	18.419	20.138	20.421	14.452	33.416	18.368	18.49	18.489	19.727	17.706	20.946	22.935	39.748	15.125	11.515	12.658	8.962			561.905	9.144	11.247	16.499
563.81	9.307	10.92	14.561	29.405	7.769	28.016	16.297	14.618	19.768	26.859	17.392	15.736	9.891	9.613	16.788	18.65	25.129	14.891	17.649	12.228	14.428	20.236	15.192	18.297	28.807	11.156	19.462	20.606	24.965	14.452	34.843	18.482	19.427	18.504	19.904	18.938	20.297	23.677	36.916	14.702	12.121	12.158	10.178			563.81	8.564	11.494	15.826
565.714	9.342	11.182	14.725	29.298	8.065	24.472	15.566	14.653	20.293	26.989	15.668	15.779	9.232	9.251	15.942	19.163	24.4	14.323	17.953	12.544	14.912	19.427	14.821	18.538	29.193	11.91	19.333	19.989	24.211	14.173	34.281	18.51	19.771	17.759	19.568	19.583	19.365	23.502	33.353	14.476	11.702	11.913	10.197			565.714	8.007	11.895	15.563
567.619	10.149	11.453	14.889	25	8.227	21.764	15.251	14.018	19.366	26.75	15.804	16.252	9.82	9.568	15.321	19.293	24.576	14.393	17.784	13	18.572	18.918	15.558	19.082	28.17	12.066	18.753	19.33	20.053	13.17	35	19.357	19.771	16.752	19.358	18.848	19.946	22.76	30.84	14.577	11.353	11.533	8.764			567.619	8.122	19.309	15.654
569.524	14.614	11.044	15.1	24.69	8.307	21.008	15.817	13.147	18.366	26.37	14.764	16.748	9.455	9.527	15	19.374	24.212	14.47	17.486	12.254	23.528	18.264	16.006	17.968	27.045	11.238	18.806	20.585	17.211	12.639	35.685	19.34	19.49	16.839	20.118	18.659	20.122	23.313	29.479	14.548	11.522	11.054	8.503			569.524	8.3	24.352	15.298
571.429	22.68	11.431	15.493	26.548	8.043	21.602	17.091	13.947	18.805	25.891	14.442	18.227	8.943	9.424	15.912	19.675	24.706	15.412	19.108	12.456	24.931	18.473	15.853	18.582	27.591	12.443	18.71	21.394	16.772	13.051	34.978	19.421	19.25	17.642	20.166	19.417	20.392	23.461	29.378	14.804	11.452	11.527	8.981			571.429	8.324	18.272	16.002
573.333	27.526	11.234	15.504	24.381	8.26	21.854	17.36	14.047	19.317	26.467	14.442	19.81	9.227	9.432	16.81	19.593	26.553	16.454	19.351	13.114	24.264	18.536	16.224	18.835	26.898	12.402	18.28	19.426	17.965	14.078	33.169	21.93	20.344	17.985	19.103	19.246	19.784	24.475	30.866	15.179	11.787	12.549	9.433			573.333	8.374	16.802	15.914
575.238	28.14	10.876	15.129	22.369	8.242	21.642	17.154	13.735	18.695	27.011	14.387	18.497	9.754	9.65	16.766	19.911	25.059	16.607	18.973	12.868	22.604	18.427	16.397	18.31	28.17	11.984	17.957	18.606	17.702	14.31	31.506	21.663	20.885	17.745	19.258	18.45	18.716	24.493	31.647	14.583	11.574	12.467	9.166			575.238	8.506	19.247	16.01
577.143	27.259	11.533	15.696	18.452	8.231	23.228	17.429	14.182	18.073	25.641	15.809	17.429	10.55	9.807	16.511	19.598	23.247	15.93	20.453	12.395	20.799	19.1	17.359	19.032	30.148	12.459	18.129	19.511	17.053	13.772	30.697	19.192	20.625	17.701	19.893	19.408	19.73	23.673	31.277	14.929	11.724	12.043	9.197			577.143	8.945	20.469	20.857
579.048	24.68	11.657	15.471	14.75	8.314	21.61	17.846	14.029	18.28	25.413	16	16.018	10.398	9.185	15.81	19.228	23.294	14.898	19.791	13.211	19.39	18.891	17.365	18.646	29.068	12.148	17.71	19.713	17.772	13.537	31.056	18.468	20.854	17.182	19.974	19.19	20.351	24.705	30.008	14.946	11.941	11.636	10.045			579.048	9.216	19.364	22.955
580.952	20.886	11.555	14.986	14.536	8.44	19.553	16.874	13.5	17.402	26.554	15.749	14.252	9.332	8.955	15.599	18.813	24.376	15.556	18.291	13.965	16.635	19.055	16.064	18.69	28.557	11.869	18.14	19.223	17.474	13.622	32.337	18.237	21.083	16.62	19.627	18.507	20.959	24.406	30.067	14.381	11.949	11.587	9.764			580.952	8.851	17.142	19.585
582.857	17.149	11.489	15.775	14.345	8.343	20.561	16.371	13.147	17.268	25.804	15.598	14.264	9.763	9.807	16.737	18.821	23.788	15.869	18.399	12.816	15.654	18.627	15.859	19.968	28.227	10.967	19.441	19.904	20.351	13.765	32.449	18.131	21.229	17.394	19.531	18.848	20.311	23.387	31.176	14.381	12.371	11.745	9.185			582.857	8.607	15.086	17.496
584.762	15.351	11.496	15.932	14.298	7.758	20.276	17.469	14.235	18.524	26.761	15.317	14.975	10.175	9.922	16.489	19.228	23.612	15.288	18.25	13.184	15.736	19.773	16.692	19.741	29.75	11.336	18.409	20.66	21.684	13.388	32.303	18.382	19.406	17.577	19.649	19.161	19.878	24.014	33.555	14.69	11.82	11.783	8.854			584.762	8.624	13.698	17.325
586.667	13.092	11.073	15.55	14.024	7.711	18.984	17.406	14.759	18.366	27.141	15.472	15.166	9.863	9.366	15.905	19.5	25.788	14.837	18.034	13.553	15.403	20.909	16.635	18.956	30.114	12.697	18.065	21.053	17.614	14.027	33.888	18.708	19.01	17.277	18.849	18.654	21.554	24.59	33.891	14.762	11.482	11.516	9.223			586.667	8.983	14.105	16.94
588.571	10.561	11.204	14.782	14.179	8.065	18.211	17.291	13.535	17.89	26.174	14.769	15.945	10.384	9.263	16.058	19.118	26.353	14.69	18.25	13.535	15.717	19.509	15.154	18.842	28.159	14.123	18.376	20.138	16.737	14.558	32.854	18.343	20.208	16.803	18.373	17.777	22.311	24	33.151	14.095	11.724	10.511	9.439			588.571	8.7	18.358	16.303
590.476	10.268	10.511	14.179	14.702	8.235	19.626	17.149	13.318	17.768	26.315	14.392	15.583	9.346	9.115	15.438	18.126	26.306	14.361	18.736	14.421	15.516	18.491	14.692	17.854	27.398	15.738	18.032	19.532	19.193	13.595	30.674	17.76	19.531	17.241	18.465	17.578	20.568	22.415	31.815	14.554	11.478	11.245	8.987			590.476	8.681	22.142	16.89
592.381	9.987	10.022	14.689	14.369	8.191	24.724	16.257	13.276	18.244	26.326	14.719	14.528	8.91	9.457	15.577	18.516	28.518	14.042	18.581	13.982	15.019	19.045	14.859	18.101	26.989	15.705	17.871	20.266	19.807	13.68	31.528	18.086	18.385	17.628	18.871	17.957	18.797	21.553	29.849	14.738	11.309	12.391	8.605			592.381	9.022	19.414	20.444
594.286	9.658	10.905	15.146	14.167	8.032	29.935	16.034	13.465	19.488	25.793	14.035	14.018	9.972	9.724	15.949	19.008	30.718	15.22	18.865	13.14	15.013	19.209	15.103	17.937	26.807	16.18	18.71	20.872	17.211	13.837	30.146	18.281	18.708	16.467	18.937	18.403	20.554	21.53	30.723	14.423	11.886	12.087	8.217			594.286	8.657	15.302	22.107
596.19	10.039	11.234	14.986	15.083	7.603	30.041	16.131	13.759	20.951	24.793	13.719	13.497	9.962	9.551	16.599	18.138	35.365	16.166	19.149	11.605	15.34	18.945	14.224	17.797	28.568	16.32	19.763	22.149	27.614	12.759	29.124	17.799	20.427	16.285	18.387	17.493	22.527	22.382	31.126	13.804	11.033	11.223	8.293			596.19	9.007	13.852	19.167
598.095	9.934	11.693	15.575	15.19	7.549	25.927	15.84	13.435	19.866	25.815	14.497	13.877	9.408	8.881	16.533	18.167	39.059	15.409	18.764	11.623	15.063	19.218	13.679	17.854	28.489	16.18	21.14	21.862	27.947	13.088	29.281	17.627	20.104	17	19.55	17.242	20.703	23.433	31.21	13.982	10.21	10.435	9.006			598.095	9.564	13.778	16.785
600	9.838	11.81	15.104	15.512	7.538	22.301	15.823	13.235	16.951	27.141	14.503	15.012	9.009	8.374	15.664	18.874	36.494	14.406	18.838	12.079	14.516	18.182	13.769	17.038	27.17	16.172	20.054	20.181	16.228	13.796	29.247	17.521	19.875	17.285	19.59	18.517	18.622	23.742	29.639	14.589	11.103	10.658	9.197			600	9.592	20.216	16.153
601.905	9.386	15.445	14.339	14.524	7.289	19.902	16.349	12.676	16.537	25.87	14.111	15.46	8.692	8.506	15.015	19.427	35.976	13.898	18.554	11.965	14.226	17.882	12.987	19.823	28.205	13.844	19.667	19.83	17.14	13.371	30.09	17.354	20.49	16.146	18.273	18.37	18.905	23.641	27.176	13.411	10.651	11.011	8.408			601.905	9.185	22.84	15.99
603.81	8.904	21.518	15.136	14.179	7.823	17.813	16.811	13.194	16.988	24.12	13.467	15.117	8.758	8.774	14.956	19.411	37.471	13.502	18.365	11.912	14.956	18.127	12.481	20.722	27.682	11.746	19.151	20.202	17.842	13.214	29.629	17.318	18.458	17.051	18.391	17.1	20.446	22.945	24.958	13.006	10.386	10.728	8.694			603.81	9.115	17.185	15.601
605.714	8.68	23.328	14.996	14.917	7.747	16.138	16.211	13.259	15.488	24.087	13.915	15.552	9.057	9.42	15.146	18.504	35.835	14.55	18	11.754	15.201	19.164	13.237	18.709	28.318	12.156	18.086	20.223	16.105	13.109	29.551	16.799	19.135	18.066	18.137	17.569	20.162	22.539	25.109	13.619	10.614	10.891	9.777			605.714	9.223	14.759	16.131
607.619	8.939	22.241	14.696	13.44	7.195	16.138	15.28	12.947	15.817	25.641	14.724	15.436	9.142	9.387	14.949	18.622	32.094	14.933	17.189	12.026	15.679	20.009	14.032	19.089	29.17	12.369	30.785	20.426	15.053	13.017	30.146	17.237	21.385	17.35	18	18.19	23.297	24.332	26.387	13.161	10.96	10.62	9.911			607.619	9.031	13.71	17.706
609.524	8.996	18.891	14.932	14.31	7.108	16.528	14.64	13.194	16.622	26.587	15.553	14.834	9.024	8.877	15.197	19.325	27.518	14.211	17.088	12.395	15.805	18.964	14.468	19.785	27.989	11.648	29.742	21.17	17.439	13.231	30.034	17.627	20.031	17.489	18.712	18.194	24.23	24.382	27.672	13.685	11.14	10.386	10.28			609.524	8.731	12.043	18.897
611.429	8.474	14.599	15.271	15.452	7.35	16.171	15.463	13.094	17.549	25.946	16.809	14.706	9.555	8.671	15.197	19.63	25.612	15.578	17.953	11.825	14.623	18.427	14.34	19.81	28.466	12.049	20.86	20.628	18.333	12.833	30.022	17.061	19.781	17.321	18.83	18.488	20.122	23.249	29.008	13.25	11.088	10.679	10.363			611.429	8.59	11.494	23.012
613.333	8.754	12.146	15.261	14.714	7.758	15.431	15.846	14.006	17.329	27.022	16.678	15.595	9.64	9.033	15.044	19.646	24.8	16.307	18	11.772	14.667	19.309	14.321	19.373	28.682	11.943	23.151	20.521	17.702	12.861	32.079	17.819	20.219	17.307	18.875	17.981	17.973	23.355	28.513	13.226	11.489	11.761	9.331			613.333	8.683	11.216	26.215
615.238	9.158	11.796	19.021	14.571	7.545	15.561	15.354	14.818	21.171	26.75	16.628	15.816	9.791	9.333	15.19	19.016	23.682	15.31	18.142	12.342	15.321	19.955	14.218	19.994	29.398	12.066	21.505	22.66	18.14	13.361	31.899	18.922	20.49	17.832	18.97	18.384	17.662	23.516	28.353	15.19	11.478	11.81	8.637			615.238	9.412	10.531	23.826
617.143	9.509	11.956	22.971	14.405	7.834	17.13	16.314	14.024	21.854	26.217	16.593	15.307	9.981	9.765	15.927	19.224	24.271	15.275	19.277	11.86	15.245	19.709	13.385	21.266	30	13.164	20.312	22.936	17.561	13.789	30.618	18.571	20.344	17.511	19.328	19.227	19.338	24.06	28.765	15.375	11.121	11.451	8.669			617.143	9.163	10.568	21.685
619.048	9.32	11.504	20.636	14.833	8.303	17.642	17.446	13.518	17.939	28.685	16.915	14.877	9.597	10.177	16.204	19.228	25.212	15.93	18.899	11.877	15.019	19.882	13.667	20.367	28.784	12.852	19.978	21.979	17.491	14.044	31.753	17.794	19.458	17.584	19.517	19.062	19.014	23.313	27.655	14.542	11.279	11.429	9.057			619.048	8.429	10.667	20.704
620.952	9.145	11.431	17.411	15.476	8.09	17.236	16.851	13.824	18.756	28.522	17.558	14.951	8.981	9.761	16.599	19.195	23.824	16.482	17.743	11.939	15.119	20.791	14.404	19.918	29.864	11.803	20.452	21.798	18.07	13.595	34.36	17.685	20.552	17.759	19.17	18.787	18.986	23.028	27.134	13.863	11.838	10.397	9.14			620.952	8.398	10.932	19.27
622.857	9.346	11.117	16.493	15.155	8.148	16.26	16.743	13.747	19.159	26.348	19.075	15.282	8.649	9.918	16.328	19.862	21.741	16.099	18.486	11.982	15.333	19.736	14.808	20.462	31.545	11.82	19.677	20.915	18.789	13.714	36.865	18.44	20.604	18.088	19.487	19.033	20.446	22.507	28.134	14.345	11.908	11.571	9.732			622.857	8.336	10.932	18.897
624.762	9.539	11.431	16.621	14.071	8.621	15.325	17.646	13.824	19.512	27.772	21.513	15.822	9.536	10.078	16.161	20.337	21.388	15.869	19.77	13.061	15.686	19.473	15.141	20.361	31.386	12.311	18.903	21.798	17.842	14.129	36.315	18.485	19.979	18.044	19.749	19.796	20.041	22.825	23.723	14.435	12.088	12.293	9.771			624.762	8.909	11.352	19.322
626.667	9.86	11.153	16.314	14.44	8.325	16.089	17.497	13.441	18.78	27.946	22.442	16.638	10.256	9.642	16.015	20.528	22	15.933	20.297	13.281	15.403	20.582	15.635	20.032	30.75	12.615	22.28	22.532	17.211	13.446	35.157	17.649	20.229	18.292	19.347	19.924	18.919	23.502	19.857	14.381	11.618	12.609	9.127			626.667	8.926	13.543	19.506
628.571	9.763	10.423	15.996	15.821	8.245	16.87	16.806	13.282	18.11	26.337	22.186	16.037	10.517	10.004	16.022	19.512	21.541	15.022	19.912	11.86	15.151	20.518	16.135	19.937	30.068	12.541	36.194	21.5	17	12.925	33.404	17.125	20.156	20.08	18.985	19.72	19.486	22.59	20.975	14.946	11.309	12.793	9.446			628.571	8.424	19.969	19.37
630.476	9.241	11.022	15.95	15.298	8.762	18.179	16.36	14.441	18.634	26.641	21.769	15.975	9.81	9.819	16.883	18.386	20.376	14.527	19.534	12.096	14.616	20.255	17.436	20.304	30.034	14.082	44.226	20.213	17.351	13.503	32.91	17.607	19.812	19.606	19.804	19.441	19.595	23.249	20.471	15.744	11.349	12.418	9.732			630.476	8.122	22.154	20.029
632.381	9.162	10.752	16.289	14.381	8.686	18.756	16.377	15.1	21.085	27.522	22.457	15.417	9.531	9.523	17.117	18.065	20.729	14.275	19.27	12.667	15.572	20.218	17.071	21.044	28.307	15.426	38.215	20.936	18.719	13.813	33.326	18.292	19.135	17.942	19.328	19.502	20.446	24.447	20.353	15.738	11.059	11.696	9.191			632.381	7.811	17.488	20.814
634.286	9.14	10.423	15.907	14.56	8.206	24.057	16.011	14.629	20.488	26.739	21.317	14.135	9.246	9.379	16.591	18.272	21.318	14.399	19.358	11.754	15.906	19.527	16.122	19.911	27.136	15.484	27.882	21.415	20.719	13.446	32.719	17.981	22.802	17.759	19.295	19.028	21.676	24.355	19.445	14.833	10.974	10.734	8.943			634.286	8.372	15.105	21.069
636.19	9.118	10.839	15.071	14.631	7.733	30.715	16.286	13.847	17.463	26.37	19.467	14.534	8.602	9.453	15.496	19.191	21.082	14.799	19.824	12.079	15.597	18.536	16.449	19.386	27.25	14.631	26.355	20.436	19.965	13.061	34.393	17.15	23.365	17.606	19.83	19.038	20.77	24.401	19.58	14.446	10.761	10.777	8.79			636.19	9.139	13.401	20.573
638.095	9.158	10.401	15.168	14.631	7.505	29.667	16.526	13.829	17.463	27.337	18.98	14.706	9.213	9.716	15.613	19.443	21.824	14.035	19.081	12.132	16.189	18.936	17.59	20.405	27.989	13.082	29.753	21.819	16.807	12.847	36.056	17.209	21.062	17.701	18.779	19.303	21.122	24.502	20.706	14.423	10.882	10.913	8.72			638.095	8.424	12.235	18.563
640	8.829	10.401	15.943	14.798	7.823	26.512	16.44	14.112	19.28	25.989	18.487	15.025	9.327	9.119	16.153	18.659	22.612	14.07	19.358	12.395	17.025	19.518	17.353	21.076	29.114	13.049	26.656	22.904	16.86	13.177	35.18	17.772	21.479	18.723	19.295	18.962	20.081	23.608	19.605	14.798	11.401	11.332	9.293			640	8.204	12.29	17.37
641.905	8.737	11.307	15.593	15.024	8.141	23.236	16	14.982	19.622	25.652	18.261	15.399	9.038	9.062	16.496	18.561	23	14.396	19.155	13.175	17.107	19.555	15.846	21.291	30.159	13.426	29.215	23.032	17.614	13.272	32.348	17.68	20.177	18.226	19.513	19.137	19.473	22.719	20.361	14.845	11.243	11.228	9.102			641.905	8.947	12.605	16.938
643.81	9.346	11.591	14.982	14.94	8.123	20.114	15.371	14.906	18.671	26.924	18.457	16.018	10.047	10.045	16.299	19.106	22.588	13.799	19.743	14.053	16.107	18.327	16.109	19.987	30.83	12.869	34.011	22.66	17.368	13.163	31.124	17.755	18.719	17.336	19.373	19.806	20.662	22.949	21.092	14.208	11.298	10.837	8.688			643.81	8.667	14.006	16.549
645.714	9.978	11.38	15.829	15.25	7.708	17.805	16.589	14.747	19.39	27.054	18.533	16.84	10.147	10.259	16.445	19.52	21.953	13.505	19.804	13.868	15.302	18.836	15.75	19.835	29.148	14.926	29.312	21.606	17.333	13.459	33.18	18.198	18.74	16.927	19.863	19.938	18.716	23.664	20.387	14.012	11.768	10.902	8.873			645.714	8.381	19.605	19.427
647.619	9.636	11.686	15.882	15.381	7.845	16.846	17.68	14.594	18.72	26.717	18.668	16.368	9.303	9.872	16.453	19.78	21.941	14.038	18.534	12.947	14.994	20.2	14.853	19.513	28.58	17.484	27.677	21.213	18	13.493	34.652	17.964	19.198	17.182	18.838	19.175	17.811	24.065	20.496	14.762	11.515	11.185	9.357			647.619	8.607	21.938	21.286
649.524	10.075	13.219	15.164	14.952	8.061	16.894	17.566	14.506	17.488	26.359	19.06	16.994	9.592	9.704	16.051	19.691	21.965	14.578	18.649	12.965	15.509	19.145	14.455	26.975	30.557	18.328	29.247	20.479	19.456	13.735	31.64	18.103	19.51	17.533	18.432	18.934	20.5	23.359	20.084	14.756	11.522	11.163	9.229			649.524	8.146	16.87	18.771
651.429	10.088	19.81	15.014	15.964	7.329	16.138	16.926	14.959	18.39	26.467	19.211	17.258	10.137	9.523	15.759	19.882	21.447	13.847	18.615	13.035	15.258	18.991	14.872	35.981	30.227	17.861	25.14	20.585	19.228	13.871	30.573	18.632	20.719	17.248	19.328	18.659	20.905	22.101	19.605	14.708	11.14	11.299	9.025			651.429	7.763	14.685	17.076
653.333	8.912	22.664	14.879	15.714	7.325	16.846	16.166	14.471	18.049	27.533	18.146	16.656	9.924	9.412	15.73	19.984	20.482	13.502	19.615	12.202	15.17	19.127	14.071	31.873	29.523	14.32	24.634	20.968	19.263	13.293	31.292	18.1	19.302	17.299	19.753	19.322	20.486	23.461	19.882	14.935	11.206	11.065	9.433			653.333	7.861	16.827	15.94
655.238	8.667	18.036	14.711	15.06	8.264	16.585	16.229	13.694	17.5	26.793	16.819	17.982	10.047	10.045	17.314	19.561	20.624	13.722	19.791	11.623	15.497	18.945	13.513	24.044	29.455	12.672	26.914	22.415	18.509	13.415	30.562	18.025	18.812	17.088	19.539	20.057	21.662	25.037	20.126	15.25	12.103	11.484	9.51			655.238	8.194	18.025	15.628
657.143	8.789	15.08	14.782	15.274	8.39	14.813	16.417	14.041	18.683	26.696	17.06	17.914	9.649	10.021	17.358	20.541	21.729	14.355	19.581	12.526	16.61	18.691	14.186	28.766	27.864	13.32	27.602	22.543	17.702	12.905	31.64	18.529	20.167	17.292	19.502	19.062	20.824	24.014	21.109	14.31	11.515	12.054	9.268			657.143	8.465	16.222	15.914
659.048	8.605	13.693	15.057	14.583	7.469	15.146	16.246	14.441	24.878	26.978	16.905	16.503	9.005	8.905	16	20.146	22.282	14.732	18.716	13.465	17.346	18.618	14.481	33.494	27.591	12.09	24.581	20.926	18.263	12.83	33	18.443	20.906	17.971	19.339	18.204	19.054	24.382	20.084	13.81	11.077	11.554	9.032			659.048	8.544	13.957	15.938
660.952	8.763	11.92	14.968	15.702	7.957	15.244	16.743	13.529	25.634	28.087	15.291	17.233	10.062	9.144	15.839	19.199	22.094	15.431	17.784	12.842	16.245	18.009	14.083	31.684	27.318	11.721	23.032	20.766	17.737	13.483	33.045	17.964	20.729	16.92	19.387	18.194	19.662	24.35	18.79	14.048	11.305	11.087	8.554			660.952	8.842	12.327	16.979
662.857	9.154	10.635	15.518	15.536	8.426	15.301	16.937	13.282	19.622	28.598	15.221	18.411	11.104	9.996	15.891	19.76	22.929	16.137	18.392	13.114	15.516	17.164	13.365	31.595	28.67	12.025	25.226	19.819	17.684	13.095	31.899	18.136	19.427	16.088	19.413	18.607	22.122	23.687	19.723	13.75	11.43	10.826	9.045			662.857	8.489	11.747	20.554
664.762	8.956	11.139	15.214	14.155	8.004	15.805	16.897	13.312	18.085	26.5	15.291	17.908	10.384	9.819	16.504	19.862	23.729	16.224	19.459	13.289	15.478	18.155	13.801	26.367	30.307	11.246	27.849	19.702	16.737	13.017	29.854	17.936	18.167	16.453	19.007	19.303	23.122	23.604	19.034	14.071	11.456	11.299	9.567			664.762	8.424	10.537	22.038
666.667	9.092	10.92	15.25	14.81	7.838	16.382	16.537	13.888	19.549	24.652	14.166	16.883	9.498	9.465	16.672	18.825	23.235	16.454	19.189	12.237	15.836	19.391	14.769	22.114	29	10.975	29.183	20.245	17.596	13.422	29.191	17.468	18.677	17.029	18.804	19.796	22.608	23.129	18.782	13.946	11.353	11.793	9.478			666.667	8.379	9.617	19.473
668.571	9.645	11.015	15.911	14.56	7.682	16.268	15.829	15.088	19.268	25.543	14.09	17.288	9.355	9.296	15.321	18.146	22.259	15.658	19.041	12.746	16.031	19.391	14.718	22.43	27.602	11.352	27.086	19.191	18.316	13.551	29.618	17.772	19.188	16.248	18.454	20.185	20.5	22.912	18.277	13.774	11.228	11.674	9.115			668.571	8.129	10.389	17.795
670.476	9.132	11.292	15.804	14.345	7.978	15.098	16.051	15.794	17.61	28.109	14.764	17.147	9.687	9.14	14.051	18.772	21.259	14.767	19.514	13.211	15.195	19.355	15.417	22.437	26.818	11.557	23.581	19.681	16.877	12.714	31.022	17.362	18.688	16.058	18.24	20.668	18.324	22.364	18.109	13.47	11.096	11.022	8.395			670.476	8.429	10.414	16.723
672.381	8.662	10.226	15.111	14.69	7.556	15.398	16.366	17.112	18.427	28.957	15.121	16.049	10.123	9.103	15.124	19.195	23.518	15.214	18.946	12.754	14.252	18.964	17.282	23.994	28.602	11.574	24.785	21.691	17.228	13.456	32.584	16.563	19.49	17.496	19.063	19.735	17.73	22.991	19.588	13.786	11.199	11.391	8.299			672.381	8.355	10.247	15.768
674.286	9.048	10.825	14.971	15.238	7.646	17.431	16.72	19.212	19.317	28.663	14.548	15.755	10.09	9.617	16.161	19.679	26.847	16.093	18.642	13.167	15.453	18.209	17.904	26.38	30.034	11.934	25.441	22.074	17.649	13.537	31.955	18.081	19.229	16.876	19.568	18.28	17.514	23.318	19.218	13.75	11.04	11.761	8.873			674.286	8.341	10.636	15.379
676.19	9.702	11.934	14.954	14.845	8.227	25.228	16.446	20.324	19.854	27.696	14.256	15.577	9.55	9.716	15.672	19.431	27.612	16.751	18.615	14.202	16.453	18.427	16.603	24.899	29.648	11.467	23.032	22.628	18.684	12.578	31.079	20.298	18.74	15.562	18.406	19.303	18.824	23.134	18.286	13.637	10.312	11.065	8.975			676.19	8.585	10.815	15.847
678.095	9.785	12.051	14.979	15.012	8.556	31.691	16.389	20.776	18.451	28.315	13.945	15.564	9.005	9.428	16.555	19.61	26.212	16.725	18.932	13.289	15.818	17.791	15.622	30.62	29.784	13.156	22.441	22.383	20.035	12.929	31.584	20.228	18.938	16.905	18.863	19.882	19.392	23.028	19.185	13.292	10.349	10.668	9.096			678.095	8.496	10.975	16.239
680	9.355	11.555	14.868	15.012	8.552	29.959	17.057	19.865	19.939	30.957	14.658	14.816	9	9.235	16.27	19.703	26.929	16.53	18.351	11.737	15.541	18.155	15.231	38.614	28.545	16.631	22.129	21	18.947	13.412	34.416	20.1	18.958	17.825	19.343	19.787	20.23	22.585	19.597	12.22	10.86	10.875	8.783			680	8.197	11.469	15.745
681.905	9.048	10.774	14.954	14.131	8.087	26.496	17.109	19.671	21.341	32.739	15.196	14.19	9.536	9.461	15.672	18.951	30.141	16.821	17.588	12.149	15.333	18.364	15.135	34.266	28.409	17.467	21.796	20.223	18.105	13.707	34.551	19.73	18.906	16.54	18.609	19.37	21.635	23.032	19.395	12.643	11.07	10.799	8.414			681.905	8.554	11.574	18.778
683.81	8.829	10.19	15.114	14.393	7.83	23.52	15.897	20.006	19.024	39.239	14.281	13.681	9.417	9.786	16.423	18.687	29.718	17.272	16.986	12.632	15.176	18.109	14.846	31.715	26.966	16.213	22.871	20.606	18.421	13.112	32.596	19.058	18.719	16.445	19.244	17.73	21.014	23.387	18.496	13.28	10.724	10.929	8.548			683.81	8.228	11.809	24.263
685.714	9.136	10.438	15.171	14.762	7.664	20.951	15.023	18.394	18.293	48.891	14.442	13.16	8.815	9.469	16.81	18.764	30.506	17.08	17.601	11.675	15.201	17.791	14.545	30.665	26.977	14.984	24.075	21.011	17.14	12.398	33.562	18.468	19.073	16.964	19.148	18.185	19.095	22.848	17.387	13.185	10.154	10.728	8.943			685.714	7.736	17.444	23.327
687.619	9.18	10.825	15.5	14.762	7.473	19.805	15.211	16.441	18.341	54.489	15.221	13.552	9.256	9.169	16.401	19.496	33.071	16.508	19.297	10.895	15.226	18.045	14.353	24.063	28.773	13.803	22.742	20.809	18.123	12.616	35.607	18.688	18.5	16.905	18.399	18.825	16.716	22.189	17.529	12.863	10.136	9.625	9.662			687.619	8.07	23.401	18.947
689.524	9.219	9.847	15.261	14.726	7.794	18.244	16.029	14.188	18.354	51.663	14.523	14.018	9.668	8.716	15.964	19.963	34.824	16.284	19.98	12.254	14.987	19.191	14.212	21.177	29.295	11.59	22.667	21.989	19.842	13.02	35.393	19.696	18.438	17.321	18.162	19.408	16.581	22.046	17.605	13.81	10.684	9.832	9.51			689.524	8.343	21.648	17.449
691.429	9.684	10.175	15.982	15.667	7.91	16.87	17.154	14.053	18.085	45.859	13.975	14.27	9.469	8.687	15.912	19.512	34.306	15.629	20.534	12.868	16.05	20.064	14.141	20.968	29.92	11.451	22.355	22.085	19.404	13.459	33.258	20.114	19.99	17.409	18.369	19.417	19.054	22.401	18.664	14.256	11.066	10.886	9.363			691.429	8.336	17.407	16.618
693.333	9.149	10.949	20.718	16.19	8.014	17.813	17.343	14.906	17.476	45.076	13.281	15.325	9.175	9.527	15.628	19.321	33.753	16.316	20.182	12.263	16.44	19.545	13.705	21.924	28.727	12.197	20.86	21.255	19.018	13.014	32.022	19.649	20.448	18.117	18.875	18.948	19.554	22.286	18.924	14.149	11.364	11.315	9.433			693.333	8.338	15.309	16.174
695.238	8.82	10.438	22.421	15.286	8.495	16.423	16.777	15.053	19.817	44.152	13.583	16.337	9.569	9.642	16.029	19.167	33.671	16.78	19.52	12.763	15.811	18.282	13.776	22.867	27.727	11.336	26.376	20.649	18.877	13.044	33.483	19.298	18.562	19.146	18.513	19.024	19.649	23.212	19.244	14.054	11.746	11.103	9.287			695.238	8.856	14.71	16.298
697.143	9.263	11.241	18.893	14.714	8.22	15.512	16.96	14.947	21.134	40.326	14.774	16.429	9.915	9.481	16.036	19.659	30.659	16.31	19.75	12.886	15.843	19.045	14.487	22.304	28.648	11.057	33.409	21.074	19.561	13.949	35.742	19.145	18.552	19.007	18.768	19.024	21.581	24.258	19.891	14.042	11.857	10.946	9			697.143	8.811	16.531	16.32
699.048	9.368	11.861	17.3	14.5	8.267	16.041	16.269	14.659	19.634	36.967	14.402	15.994	9.716	10.012	16.328	20.732	29.612	16.834	19.919	13.956	15.371	19.991	14.808	22.424	29.705	11.279	33.075	21.106	18.842	13.646	33.708	18.613	20.969	18.766	19.963	19.905	21.554	24.512	18.849	14.351	11.805	10.978	8.892			699.048	8.472	20.833	15.902
700.952	9.61	11.051	16.421	14.714	8.242	15.967	15.651	14.418	18.854	36.12	14.523	15.448	9.697	10.185	16.642	20.947	29.741	16.348	19.932	14.57	15.447	20.345	14.167	23.703	29.58	11.918	27.226	21.543	19.228	13.105	32.775	18.203	20.833	18.825	19.993	20.251	19.905	24.037	17.597	14.518	11.132	11.179	9.293			700.952	8.95	20.068	16.434
702.857	9.399	11.109	16.114	15.179	8.267	16.154	16.154	13.665	17.976	35.88	15.075	15.147	10.199	9.794	16.314	20.626	26.965	16.137	19.061	13.482	15.434	20.327	14.449	24.335	28.886	11.992	25.548	22.894	19.825	13.463	34.494	18.164	20.094	18.336	19.439	19.18	19.986	22.949	18.319	14.47	11.048	11.103	10.312			702.857	9.077	15.463	16.64
704.762	8.768	11.606	15.679	16.274	8.48	20.618	16.086	13.2	19.817	36.489	14.754	15.387	9.891	9.79	16.307	19.846	27.271	16.166	18.432	12.711	15.61	19.545	14.372	30.373	28.375	12.197	27.849	21.362	18.772	13.282	33.73	17.994	18.469	17.102	18.852	18.929	20.5	22.53	19.168	13.274	11.607	10.614	9.707			704.762	8.53	13.63	15.394
706.667	8.697	11.664	15.193	15.69	7.989	29.293	15.594	13.041	20.963	39.054	14.663	15.153	9.464	9.617	16.723	19.492	28.082	16.105	18.324	12.351	15.151	19.082	13.609	34.791	30.045	12.107	30.548	21.798	18.333	13.136	32.775	18.036	24.573	16.781	18.967	19.19	18.986	22.756	19.597	14.054	11.301	10.772	9.197			706.667	8.465	12.278	15.721
708.571	9.022	11.861	15.975	14.869	7.996	30.634	14.88	13.353	19.476	41.196	13.91	14.822	8.806	9.074	16.628	19.598	25.165	15.92	18.392	12.114	15.239	19.409	14.34	27.81	30.068	11.221	27.376	22.904	18.053	13.357	31.966	18.345	26.594	17.438	19.262	19.204	19.514	24.06	19.395	14.262	10.768	11.283	10.083			708.571	8.693	10.673	16.263
710.476	9.167	12.095	16.125	15.19	8.303	26.886	15.726	14.512	19.427	42.978	13.905	14.54	8.54	9.317	15.307	19.756	24.929	15.693	18.973	11.746	15.629	19.373	14.872	23.335	29.955	11.557	27.742	23.096	18.895	13.942	32.472	18.167	20.521	17.985	19.38	19.46	19.459	24.613	19.084	13.649	11.614	11.609	9.739			710.476	8.446	10.679	15.63
712.381	9.531	12.292	16.414	14.893	8.209	23.195	16.571	15.512	18.866	42.554	14.417	14.362	8.768	10.136	15.336	19.577	27.212	16.192	19.588	12.719	15.428	19.591	14.846	25.544	30.364	11.713	31.71	23.691	19.596	14.211	34.303	18.705	20.969	17.496	19.72	19.199	18.784	24.392	19	14.482	12.029	11.734	8.739			712.381	8.036	10.926	15.85
714.286	9.825	12.19	16.689	14.964	8.314	20.366	16.354	15.082	19.5	39.63	15.08	14.975	9.232	10.716	16.547	19.63	31.329	16.093	19.716	13.088	15.403	20	14.25	26.759	30.114	12.377	26.677	22.851	17.877	13.959	34.449	18.635	21.01	17.095	18.893	19.768	19.27	24.484	18.941	14.94	11.809	11.978	9.274			714.286	8.046	10.79	16.783
716.19	9.614	11.569	16.193	15.464	8.426	19.407	16.897	14.388	21.268	36.033	16.377	15.067	9.379	9.798	17.022	19.74	35.341	15.735	19.432	13.211	15.258	18.982	13.699	25.595	29.841	12.713	29.118	22.383	16.684	14.197	33.146	17.663	21.927	17.584	18.524	20.531	19.392	23.488	19.16	14.595	11.511	11.995	10.032			716.19	8.151	11.105	17.012
718.095	9.307	11.212	16.204	14.226	8.191	16.911	17.577	14.424	23	33.13	16.342	14.699	9.265	8.572	17.248	19.972	37.929	15.732	19.311	13.649	15.616	18.055	14.013	24.335	28.17	11.639	27.484	22.202	17.105	14.211	32.506	17.735	21.583	18.664	20.358	20.796	20.027	22.894	18.908	14.321	10.86	12.152	10.185			718.095	8.249	11.093	16.403
720	9.452	11.891	16.414	14.452	8.303	16.163	18.08	14.694	21.293	32.011	15.99	14.847	9.517	9.041	17.066	20.175	36.976	15.879	19.534	13.061	15.969	17.727	14.186	23.62	29.477	11.311	22.441	22.479	18.702	14	32.551	18.111	20.375	19.635	20.336	20.782	19.5	23.77	19.563	15.202	11.335	11.696	10.338			720	8.686	11.691	16.482
[truncated: 40 more columns]

## Sheet: Figure 1E&S1C 1uM Chronic 3
	Baseline																						Following dopamine exposure
Seconds	ROI 1	ROI 2	ROI 3	ROI 4	ROI 5	ROI 6	ROI 7	ROI 8	ROI 9	ROI 10	ROI 11	ROI 12	ROI 13	ROI 14	ROI 15	ROI 16	ROI 17	ROI 18			Seconds	ROI 1	ROI 2	ROI 3	ROI 4	ROI 5	ROI 6	ROI 7	ROI 8	ROI 9	ROI 10	ROI 11	ROI 12	ROI 13	ROI 14	ROI 15	ROI 16	ROI 17	ROI 18
1.90476	9.884	9.336	7.893	12.106	8.476	5.971	6.074	6.236	6.892	8.35	5.026	6.179	12.873	5.099	6.313	5.144	4.197	6.231			1.90476	7.095	8.005	6.857	8.502	7.963	5.822	5.478	5.824	6.274	6.537	4.842	5.512	10.648	5.528	6.904	4.778	4.895	6.514
3.80952	9.179	9.94	7.556	11.657	8.381	6.395	5.78	6.587	7.309	7.735	4.626	6.368	12.884	5.614	6.674	4.635	4.29	5.898			3.80952	7.762	8.551	7.593	9.279	7.529	5.718	5.455	6.127	6.789	6.302	4.932	5.681	11.591	5.845	7.135	4.556	5.037	7.028
5.71429	9.705	9.862	7.455	12.293	8.653	6.638	5.553	6.745	7.554	7.838	4.861	6.3	12.347	5.74	6.791	4.812	4.831	6.527			5.71429	7.762	8.754	7.313	9.238	7.243	6.092	5.498	6.359	6.303	6.438	4.664	5.912	11.472	5.803	6.692	4.36	4.988	6.736
7.61905	10.547	10.569	7.513	12.879	9.245	7.014	5.965	7.046	7.471	8.325	5.33	6.626	12.318	5.816	6.46	5.119	5.399	7.113			7.61905	7.349	8.572	7.121	9.022	7.581	6.155	5.651	5.984	6.44	6.272	4.979	6.06	11.534	5.423	6.88	4.347	4.562	6.111
9.52381	9.274	11.707	8.273	12.768	8.83	7.1	6.319	7.012	7.373	7.94	5.209	5.874	12.353	5.417	6.16	4.903	5.311	6.952			9.52381	7.151	8.348	7.181	9.078	7.662	6.27	5.421	5.902	6.634	5.772	4.856	5.389	11.364	5.12	6.812	4.522	4.302	6.111
11.4286	8.663	11.379	8.743	12.793	8.932	7.067	6.606	7.042	8.397	8.145	5.061	5.547	12.59	5.475	6.222	4.596	5.066	6.371			11.4286	7.563	7.422	7.187	9.059	7.301	6.822	5.368	6.306	6.309	6.728	4.377	4.874	10.591	5.225	6.462	4.838	4.605	6.338
13.3333	9.495	10.914	8.353	13.025	9.163	7.176	6.773	7.413	8.691	8.419	5.017	6.084	13.064	6.09	6.877	5.249	5.082	6.618			13.3333	7.524	7.38	6.907	8.862	7.279	6.523	5.431	6.31	6.554	7.278	4.733	5.411	10.636	5.225	6.562	4.832	5.056	6.009
15.2381	11	11.56	8.385	12.818	8.973	7.086	6.975	7.463	8.074	7.846	5.435	6.516	12.694	5.794	6.901	5.838	4.995	6.828			15.2381	7.476	7.909	6.72	8.97	7.919	5.977	5.239	6.082	6.32	7.074	4.671	5.832	10.739	5.401	6.567	4.525	4.778	6.065
17.1429	11.305	11.767	8.492	12.348	9.612	6.829	6.642	7.185	7.75	7.795	5.574	6.826	13.145	6.058	7.048	5.744	4.907	7.005			17.1429	7.27	8.561	6.962	9.164	8.324	5.966	5.56	6.208	6.583	7.093	4.993	5.846	11.017	5.648	6.788	4.508	5.154	6.81
19.0476	10.305	11.81	8.497	12.884	9.238	7.29	6.688	7.236	7.618	7.615	5.704	6.816	13.555	6.386	7.094	5.339	5.443	7.22			19.0476	7.167	8.717	7.093	9.234	7.897	5.77	6.129	6.453	7	6.944	5.199	5.754	11.71	5.366	7.082	4.421	5.512	6.861
20.9524	9.853	12.198	8.422	13.086	9.116	7.395	6.84	7.707	8.152	7.538	6.087	6.253	13.78	5.641	6.901	5.007	5.24	7.183			20.9524	7.944	8.433	6.912	9.004	8.066	5.948	5.656	6.216	6.806	7.006	5.048	5.867	12.153	5.049	6.697	4.33	5.247	6.301
22.8571	10.053	11.069	7.759	12.818	9.027	6.757	6.965	7.521	8.265	8.342	5.591	5.805	13.717	5.341	7.34	5.26	4.934	7.597			22.8571	7.968	8.305	6.984	8.829	8.228	5.759	5.278	7.184	6.571	6.821	4.322	5.789	11.114	5.056	6.385	4.283	4.951	6.032
24.7619	10.295	11.578	7.93	12.742	8.83	6.914	7.082	7.502	8.279	8.051	5.174	5.584	13.393	5.973	7.251	5.776	5.344	7.387			24.7619	7.508	7.952	6.577	9.216	7.743	5.626	5.909	9.469	6.611	6.364	4.171	5.253	10.301	5.092	6.611	4.522	4.531	5.944
26.6667	10.642	12.672	8.364	13.136	9.313	7.233	7.496	7.359	7.76	7.444	5.417	6.247	13.428	6.457	6.917	5.736	4.787	6.935			26.6667	7.905	8.053	6.335	9.375	7.765	6.27	5.986	10.278	6.949	6.173	4.432	5.288	10.847	5.444	6.668	5.027	4.543	5.949
28.5714	10.305	11.164	8.037	13.354	8.476	7.386	6.986	6.826	7.338	7.162	5.504	6.674	12.792	5.946	7.107	5.523	4.727	6.898			28.5714	7.452	8.219	6.522	9.149	7.809	5.828	5.689	9.51	6.983	6.426	4.384	5.533	11.04	5.423	6.591	4.707	4.963	6.204
30.4762	9.568	9.698	8.294	12.778	8.388	6.81	6.277	6.799	7.284	7.889	5.313	6	12.717	5.525	7.243	5.718	4.896	7.435			30.4762	6.675	8.898	6.621	9.249	7.463	5.282	5.426	8.261	6.96	6.66	4.781	5.807	11.71	4.937	6.663	4.37	4.907	6.444
32.381	8.674	9.819	8.412	12.859	9.02	7.181	7.213	7.301	7.446	8.581	5.243	6.226	12.844	5.691	7.214	5.469	4.989	7.312			32.381	6.841	8.861	6.473	9.706	7.206	5.121	5.282	7.176	6.617	6.204	4.712	5.916	11.114	5.169	6.981	4.559	4.759	6.213
34.2857	8.716	10.647	8.422	13.737	9.476	7.119	7.011	7.598	7.926	8.154	5.304	6.689	13.301	6.045	7.187	5.718	5.574	7.081			34.2857	7.389	8.545	6.654	9.874	7.184	5.638	5.651	6.482	6.629	6.16	4.336	5.793	10.875	5.296	6.856	4.596	5	5.898
36.1905	9.168	11.672	8.326	13.646	9.578	7.005	6.539	7.104	7.838	7.974	5.348	6.353	13.376	6.309	7.251	5.52	5.508	7.059			36.1905	7.159	9.15	6.846	9.134	7.985	6.034	5.593	6.29	6.863	6.42	4.808	5.67	11.233	4.965	6.433	4.684	5.191	5.815
38.0952	9.474	11.707	8.021	12.884	9.422	7.643	6.745	6.915	7.75	8.598	4.757	6.132	12.809	6.009	7.219	4.971	5.339	6.538			38.0952	7.349	9	7	8.766	8.199	6.006	5.498	6.506	7.623	6.272	4.822	5.491	10.79	4.951	6.644	4.889	5.883	5.843
40	10.126	10.819	8.096	12.732	9.85	7.571	6.695	7.116	8.26	8.051	4.913	6.395	13.092	6.099	7.182	5.394	5.546	6.973			40	7.952	8.882	7.495	9.041	7.662	6.362	5.679	6.796	7.2	5.957	4.637	5.975	10.994	5.514	6.913	4.848	5.889	6.13
41.9048	9.779	10.078	8.46	13.106	9.408	7.286	6.918	6.83	8.348	7.231	5.765	6.284	12.59	6.054	6.802	5.274	5.273	8.027			41.9048	7.683	8.717	6.813	9.238	7.757	6.034	5.392	6.51	5.903	5.599	4.356	5.94	10.705	5.866	6.269	4.421	4.691	6.458
43.8095	9.432	9.922	9.615	12.838	8.837	6.738	6.482	6.602	7.833	7.308	5.904	6.326	12.185	5.417	6.545	4.895	4.891	8.57			43.8095	7.294	8.353	5.841	8.814	7.919	5.851	4.895	5.869	5.817	5.772	4.103	5.319	10.114	5.831	5.865	3.949	4.278	6.273
45.7143	9.358	10.25	10.235	12.237	8.871	6.576	6.245	7.347	8.201	7.556	5.53	5.989	12.775	5.287	7.217	5.39	5.295	8.957			45.7143	7.151	8.299	5.698	8.23	7.544	5.707	4.952	5.682	5.766	5.599	4.096	5.305	10.028	5.437	6.024	3.99	4.63	6.185
47.619	9.558	10.802	9.059	12.611	8.993	6.971	6.667	7.564	8.113	8.41	5.217	5.789	12.827	5.771	7.406	5.874	5.563	9.892			47.619	7.119	8.278	5.978	8.621	7.412	5.086	5.373	5.555	5.914	5.506	4.158	5.586	10.006	5.028	6.293	3.953	5.031	6.384
49.5238	8.758	11.888	7.914	13.177	8.619	6.343	6.319	6.996	7.118	8.615	5.061	6.068	13.26	5.879	7.152	6.087	5.366	10.71			49.5238	6.119	8.193	6.253	8.48	7.059	4.494	5.144	5.653	5.829	5.599	4.288	5.765	10.42	5.232	6.558	3.781	4.802	6.486
51.4286	8.147	12.078	8.257	13.081	7.986	6.124	6.362	6.788	7.373	8.239	5.209	6.005	13.329	5.489	7.005	6.686	4.842	11.333			51.4286	6.325	8.144	6.533	8.227	7.294	4.615	5.057	5.51	5.743	5.716	4.281	5.926	10.898	5.085	6.207	4.212	4.309	6.208
53.3333	9.053	11.129	8.118	12.914	8.231	6.724	6.688	6.486	7.657	7.41	5.026	6.574	12.699	5.709	6.717	6.437	4.656	10.839			53.3333	7.302	7.904	6.407	8.539	7.272	5.851	5.024	5.686	6.257	6.049	4.432	5.751	10.79	5.085	5.928	4.273	4.623	6.44
55.2381	9.495	10.612	13.968	12.727	8.197	7.086	6.351	6.475	6.877	7.197	4.73	6.879	12.254	5.857	6.853	6.051	4.519	9.71			55.2381	6.802	7.749	5.89	8.454	6.794	6.19	4.785	6.012	6.251	5.821	4.37	5.239	10.131	4.88	5.822	3.963	5.099	6.31
57.1429	9.768	10.681	14.369	12.424	7.891	6.867	5.989	6.112	6.637	7.513	4.861	5.989	12.231	5.251	6.992	6.545	4.268	9.478			57.1429	6.087	7.85	5.621	8.364	6.743	5.615	4.852	5.776	5.851	5.667	4.041	4.846	9.688	4.711	6.163	4.131	5.117	5.431
59.0476	9.168	10.509	9.957	12.652	8.184	6.529	6.33	5.888	7.142	7.521	4.548	5.774	12.382	5.152	6.596	6.816	4.393	9.452			59.0476	6.254	8.027	5.912	8.695	7.228	5.213	4.933	5.482	6.16	6.105	3.637	4.586	10.028	6.218	6.385	4.279	6.574	5.574
60.9524	8.737	11.069	11.209	13.414	9.02	6.757	6.28	6.378	7.221	7.88	4.67	5.926	12.763	5.695	6.588	6.791	4.404	9.387			60.9524	6.246	7.631	6.319	8.784	7.522	5.253	4.928	5.371	6.04	6.272	3.479	4.691	10.443	7.331	6.029	3.946	8.346	6.162
62.8571	8.842	11.784	9.305	13.52	9.061	6.586	6.124	6.753	7.225	8.068	5.191	6.268	12.584	5.919	7.005	7.202	4.311	8.677			62.8571	6.167	7.107	6.324	8.929	7.287	5.724	5.067	5.359	5.994	6.142	3.616	4.691	10.722	7.486	6.12	3.835	8.889	5.792
64.7619	9.653	11.931	8.829	13.061	8.694	6.933	6.376	7.232	7.833	7.88	5.652	6.637	12.647	5.879	7.404	7.415	4.88	8.027			64.7619	6.548	8.005	5.857	8.81	7.559	5.345	4.919	5.163	6.469	6.173	3.938	4.965	10.676	6.782	6.399	4.199	7.13	5.037
66.6667	9.926	11.888	9.134	12.944	9.442	7.181	6.816	7.676	8.25	7.803	5.843	6.137	13.775	5.919	7.316	6.697	5.295	8.452			66.6667	6.929	8.743	5.758	8.465	7.184	5.305	4.641	5.396	6.074	6.031	4.479	5.295	10.716	5.782	6.312	4.293	6.704	5.514
68.5714	10	11.819	8.364	12.894	9.041	6.743	6.613	7.436	8.225	7.667	5.417	5.953	13.295	6.139	6.856	5.881	4.836	8.484			68.5714	6.667	8.353	5.857	8.461	6.559	5.517	4.301	5.735	5.469	6.185	4.007	5.246	10.812	5.718	6.606	4.202	8.253	6.218
70.4762	9.642	11.431	8.209	12.641	8.701	6.895	6.44	7.452	7.451	7.573	5.287	5.947	12.468	5.933	7.388	5.653	4.678	7.742			70.4762	5.992	8.818	6.115	8.558	6.603	5.161	4.589	5.592	5.36	5.716	3.534	5.512	10.96	5.824	6.75	4.152	6.92	5.796
72.381	8.789	10.948	8.267	11.813	9.177	6.881	6.528	7.544	7.446	8	5.122	6.132	12.775	5.883	7.511	5.61	5.372	7.806			72.381	6.468	14.053	6.071	8.558	7.257	5.109	4.785	5.388	5.611	5.025	4.021	5.453	11.085	5.275	6.053	3.926	5.025	5.472
74.2857	8.958	11.672	8.086	12.131	8.313	6.652	6.418	7.479	7.902	7.949	5.27	6.353	13.237	6.085	6.885	5.495	5.399	7.731			74.2857	6.659	15.717	5.808	8.506	7.324	5.121	4.043	5.327	6.011	5.265	3.89	4.961	10.295	4.592	5.87	3.791	4.494	5.361
76.1905	9.147	12.388	8	12.51	8.442	6.414	6.337	7.448	7.985	7.966	5.513	6.353	12.694	6.099	6.901	5.484	5.164	7.548			76.1905	5.929	12.909	6.115	7.9	7.816	5.017	4.11	5.482	6	5.136	3.616	4.919	9.784	4.549	5.99	3.896	5.506	5.134
78.0952	9.495	12.336	7.882	12.394	8.435	6.471	6.23	6.934	7.755	8.538	5.209	6.105	12.214	6.085	7.225	5.379	5.224	7.328			78.0952	6.468	11.556	6.401	7.755	7.662	5.132	4.89	5.286	5.377	4.809	4.068	5.007	10.625	4.901	5.865	3.734	6.716	5.333
80	8.821	15.017	7.733	12.591	7.891	6.714	6.436	6.772	7.431	7.829	4.878	5.7	12.474	5.758	7.233	5.213	5.022	6.699			80	7.452	9.85	6.516	8.472	7.507	5.218	5.746	5.633	6.314	5.093	4.616	4.86	10.852	4.775	6.361	3.889	6.401	5.315
81.9048	8.032	19.009	7.38	11.99	8.218	6.495	6.699	6.66	7.201	7.872	4.783	5.953	13.202	5.915	7.147	5.484	4.847	6.978			81.9048	6.952	8.829	6.357	8.435	7.647	5.276	5.368	5.62	6.817	4.92	4.171	4.488	10.045	4.373	6.356	3.879	5.216	5.144
83.8095	8.716	19.853	7.572	12.121	7.707	6.829	6.606	6.498	7.093	8.171	4.643	5.747	13.092	5.924	6.596	5.354	4.557	6.968			83.8095	6.111	8.786	6.148	8.413	7.39	5.529	4.761	4.906	6.486	4.784	3.925	4.526	10.017	4.81	6.115	3.862	5.352	5.037
85.7143	8.895	16.81	8.037	12.04	7.435	7.067	6.089	6.502	7.255	7.179	4.591	5.274	12.561	5.785	6.412	5.108	4.153	6.935			85.7143	6.468	8.668	6.544	8.517	7.265	5.011	4.813	5.065	6.286	4.852	4.116	4.832	10.301	6.134	6	4.104	6.37	5.199
87.619	8.253	12.534	7.706	11.848	7.469	6.348	5.656	6.9	7.382	7.248	4.357	5.495	12.295	5.484	6.495	4.852	4.29	6.452			87.619	6.746	8.187	6.588	8.651	6.941	4.684	4.632	5.416	6.097	5.148	4.377	4.853	10.568	6.683	6.159	4.054	6.698	5.273
89.5238	9.221	11.819	8.166	12.232	7.85	6.476	5.699	6.988	7.402	7.675	4.835	5.232	11.902	5.516	6.353	4.877	4.508	6.366			89.5238	6.73	7.652	6.643	8.286	6.985	4.862	4.565	5.963	6.691	5.574	4.562	5.032	10.739	6.57	6.149	3.983	7.574	5.394
91.4286	9.347	11.836	8.738	11.449	8.463	6.381	5.879	6.992	8.142	7.239	5.252	5.784	12.029	5.717	6.436	5.141	4.77	6.93			91.4286	6.325	7.503	6.648	8.271	7.199	5.494	4.737	6.082	7.029	5.938	4.418	5.144	11.119	7.239	5.995	4.047	9.012	5.588
93.3333	8.495	12.086	8.519	11.833	8.197	6.676	6.305	6.946	8.466	7.513	4.739	6.784	12.815	5.798	6.489	5.271	4.973	7.194			93.3333	6.024	7.305	6.489	8.431	7.779	5.77	5.005	5.751	6.697	5.951	4.205	5.056	11.222	7.739	6.375	4.279	9.235	5.87
95.2381	7.842	11.871	8.011	12.944	7.973	7.076	6.259	6.49	7.48	7.556	4.374	6.426	12.988	5.57	6.623	5.466	4.525	6.909			95.2381	6.524	7.866	6.736	8.643	7.603	5.586	5.11	5.531	6.943	5.765	4.979	5.063	11.409	6.923	6.582	4.323	8.21	6.009
97.1429	8.2	10.405	7.406	12.076	7.905	6.824	6.096	6.737	7.534	6.821	4.478	6	12.711	5.238	6.684	5.116	4.831	6.957			97.1429	6.921	8.807	6.571	9.156	7.199	5.672	5.191	5.518	6.977	5.864	5.158	5.463	11.341	7.845	6.712	4.118	8.926	6.042
99.0476	9.442	10.491	7.417	11.732	8.143	6.814	6.436	6.494	7.539	7.265	4.991	5.858	12.861	5.753	6.775	5.159	5.18	7.145			99.0476	7.063	8.417	6.527	8.74	7.507	5.833	5.254	5.465	6.6	5.889	4.651	5.365	10.659	8.761	6.625	3.781	10.969	5.718
100.952	9.674	10.716	8.096	11.722	8.252	6.471	6.326	6.653	7.608	7.863	5.565	6.105	13.035	5.807	6.904	5.43	4.869	7.075			100.952	7.786	8.342	6.582	8.584	7.831	6.017	5.153	5.396	6.989	5.907	4.63	4.958	10.693	7.599	6.082	3.875	10.395	5.269
102.857	8.884	10.25	8.337	11.591	8.381	6.171	5.957	6.498	7.647	7.316	5.557	6.105	12.78	5.583	6.722	5.505	4.344	6.79			102.857	7.778	8.342	7.214	8.773	7.507	5.914	4.967	5.759	7.029	5.833	4.808	5.302	11.074	7.817	5.764	4.02	9.722	5.787
104.762	8.368	9.526	8.369	11.591	8.054	6.324	6.103	6.181	7.123	7.265	5.348	5.589	11.861	5	6.612	5.397	4.514	6.441			104.762	7.476	7.824	7.61	9.145	7.176	5.724	5.56	5.784	6.68	5.889	4.712	5.281	11.676	6.908	5.918	4.057	8.611	5.824
106.667	8.274	9.543	7.738	10.97	7.782	6.443	5.933	6.537	7.23	7.581	5	5.474	11.832	4.973	6.548	5.318	5.082	6.559			106.667	7.587	9.027	7.275	8.978	7.169	6.132	5.732	5.706	6.663	5.673	4.514	5.414	11.591	6.31	6.053	4.091	7.679	5.903
108.571	8.179	9.871	7.219	11.293	7.959	6.31	6.057	6.869	7.225	7.624	4.513	5.405	12.393	4.946	6.952	5.35	4.88	6.672			108.571	7.373	9.845	6.571	8.602	7.176	6.052	6.129	5.792	6.703	5.765	4.452	5.698	10.5	7.007	5.875	4.495	7.981	6.12
110.476	8.589	10.034	7.898	12.313	7.946	6.171	7.099	7.178	7.137	7.402	4.452	5.547	12.092	4.96	7.056	5.004	4.803	6.882			110.476	7.278	8.348	6.379	8.996	6.831	5.5	6.742	5.841	6.72	6.142	4.397	5.098	10.483	6.373	6.25	4.949	6.728	5.875
112.381	9.632	10.043	8	12.121	8.102	6.443	6.954	7.116	7.093	7.171	4.739	6.095	11.832	5.601	6.618	5.061	4.612	7.151			112.381	6.73	8.31	6.5	8.914	6.75	5.523	6.134	5.927	6.48	5.673	4.63	4.895	10.994	5.915	6.308	4.579	5.438	5.477
114.286	10.189	10.733	8.011	12.066	8.633	6.362	5.982	6.741	6.971	7.496	5.296	6.005	12.035	5.502	6.711	5.173	4.754	7.263			114.286	6.571	8.749	6.335	8.532	6.934	5.345	6.254	5.747	6.463	5.309	4.788	5.07	11.097	6.19	6.183	4.017	5.691	5.324
116.19	9.768	9.845	8.016	11.904	8.748	6	6.113	6.398	7.02	7.624	5.278	5.8	11.902	5.525	6.404	5.112	4.743	7.366			116.19	6.508	7.909	6.115	8.223	6.949	5.385	6.545	5.51	5.88	5.679	4.527	5.049	10.778	6.401	6.462	4.145	6.679	5.319
118.095	9.305	9.612	7.021	11.843	8.109	6.038	5.986	6.293	6.525	7.308	4.757	6.016	11.63	5.48	6.289	4.809	4.683	7.054			118.095	6.683	8.513	6.5	8.528	6.743	5.856	7.215	5.922	5.48	5.926	4.445	4.944	9.983	7.627	6.423	4.269	8.506	5.407
120	8.884	10.31	6.824	11.672	7.932	6.405	5.429	6.579	6.706	7.299	4.452	6.047	11.647	5.489	6.43	4.354	4.721	6.618			120	7.31	8.904	6.626	8.327	6.993	5.603	7.153	6.453	5.954	6.593	4.568	5.056	9.96	7.634	6.389	4.158	8.062	5.417
121.905	9.147	10.638	6.979	11.187	7.816	6.69	5.539	6.29	7.049	7.197	4.487	5.563	11.405	5.498	6.626	4.845	4.393	6.575			121.905	7.381	8.834	6.462	8.472	7.75	5.443	6.421	6.216	5.897	7.494	4.363	4.951	10.409	6.972	6.702	4.128	8.228	5.62
123.81	10.2	10.388	6.802	11.687	7.633	6.414	6.028	5.973	6.882	7.385	4.313	5.232	11.486	4.821	6.821	4.928	4.295	6.323			123.81	7.929	10.005	7.198	9.086	7.963	5.609	6.033	5.461	6.063	7.617	4.11	4.779	10.75	7.049	6.764	4	9.809	6.296
125.714	9.884	9.836	7.583	11.995	8.204	5.952	6.028	6.741	7.387	7.111	4.261	5.505	11.809	4.942	6.634	4.755	4.251	6.457			125.714	8.571	9.882	7.379	8.955	7.603	5.661	5.938	5.739	7.063	7.173	4.014	5.109	10.835	6.451	6.894	4.246	8.444	5.884
127.619	16.811	10.336	8.749	12.015	8.605	5.952	5.904	6.849	7.971	7.487	4.939	6.121	12.225	5.377	6.497	5.069	4.541	6.914			127.619	7.595	9.075	7.159	9.182	7.478	5.954	6.541	6.192	7.343	6.667	4.425	5.232	10.608	5.887	6.745	4.283	6.667	5.63
129.524	25.642	11.397	8.578	12.818	8.088	6.219	6.234	6.645	8.181	7.889	5.548	6.489	12.549	5.668	6.733	5.437	4.656	6.892			129.524	6.365	8.321	7.264	9.182	7.235	6.241	6.885	5.943	6.88	6.611	4.219	5.032	10.381	5.901	6.442	4.047	6.457	6.13
131.429	25.274	11.293	8.032	12.965	8.224	6.457	6.862	6.907	7.961	7.521	5.757	6.237	12.879	5.65	7.021	5.798	4.934	7.129			131.429	6.437	7.262	7.192	8.658	6.669	6.103	6.742	5.971	6.966	6.34	3.753	5.025	10.733	5.972	5.99	3.909	6.025	6.204
133.333	22.179	11.043	7.834	12.303	8.435	7.138	7.028	7.734	8.289	8.325	6.043	6.105	13.058	5.807	7.193	5.989	5.585	7.522			133.333	8.111	6.973	6.659	8.312	7.015	6.121	6.096	5.829	6.509	5.957	3.87	5.046	11.42	6.042	5.928	3.848	5.451	5.685
135.238	18.842	11.276	7.791	12.313	8.626	6.781	6.787	7.309	8.373	8.248	5.913	6.179	12.37	6.381	7.166	6.025	5.645	7.726			135.238	8.071	7.834	6.736	8.383	7.772	6.184	6.196	6.098	6.017	5.994	4.493	4.975	11.96	6.113	6.409	4.269	5.63	5.843
137.143	15.589	11.457	7.898	12.646	8.272	6.29	6.862	6.525	7.578	7.872	5.443	5.842	12.399	6.063	7.016	5.574	4.923	7.457			137.143	6.992	9.299	6.742	8.506	7.86	5.856	6.44	6.229	6.463	6.938	5.116	5.526	11.898	6.155	6.188	4.29	5.58	6.407
139.048	12.537	11.621	8.037	12.056	8.374	6.748	6.762	6.56	7.51	7.581	5.391	6.226	12.78	5.83	6.888	5.426	4.59	7.253			139.048	7.611	10	6.571	9.156	7.375	5.414	6.813	5.845	7.194	6.87	4.911	5.53	10.483	6.493	6.668	4.104	6.432	6.171
140.952	10.821	11.069	7.898	11.995	8.694	6.886	6.408	6.888	7.912	7.222	5.696	6.774	12.965	5.91	7.166	5.877	4.803	7.296			140.952	7.357	9.663	6.747	9.639	6.912	5.529	6.727	5.971	7.434	6.21	4.664	5.446	10.17	6.62	6.957	4.152	6.537	6.537
142.857	10.516	11.121	7.444	12.535	8.361	7.3	6.592	7.259	7.794	7.359	5.852	6.389	13.74	5.695	7.281	6	4.88	7.188			142.857	7.135	9.299	6.264	9.197	7.029	5.448	5.665	5.833	7.074	6.568	4.514	5.544	10.33	5.873	6.135	4.094	5.08	6.634
144.762	10.4	11.483	7.631	12.116	8.299	6.881	6.408	6.888	7.397	7.402	5.426	5.963	13.064	5.426	6.853	6.025	4.421	7.081			144.762	7.452	9.401	6.033	8.985	7.206	5.356	5.431	6.029	6.366	6.086	4.329	5.393	10.597	4.845	5.788	4.316	5.142	6.282
146.667	10.032	11.112	8.128	12.813	7.741	6.586	5.943	6.849	7.118	6.897	4.626	5.658	12.139	5.363	6.644	5.314	4.268	7.054			146.667	7.278	9.711	6.423	8.944	7.515	6.759	5.976	5.943	6.463	5.957	4.664	5.393	11.267	5.106	6.188	4.286	6.043	6.38
148.571	9.421	11.362	7.888	13.101	7.51	6.943	6.365	7.019	6.985	6.675	4.791	5.547	13.202	5.659	6.81	4.881	4.962	6.683			148.571	7.087	9.599	6.819	9.309	8.25	8.362	6.435	5.437	6.811	5.815	4.979	5.46	11.159	5.655	6.731	4.316	5.932	6.407
150.476	9.2	12.043	7.561	11.939	8.571	6.676	6.479	6.641	7.049	7.068	5.435	5.974	13.711	5.682	6.417	5.105	5.388	6.527			150.476	6.69	8.947	6.912	9.535	7.934	9.184	6.603	5.539	6.56	5.593	4.644	5.326	10.438	5.93	6.966	4.65	7.043	6.667
152.381	9.316	11.733	7.556	11.616	8.122	6.505	6.55	6.525	7.902	7.769	5.391	6.253	12.786	5.466	5.997	5.477	5.087	6.935			152.381	6.635	9.086	6.72	9.364	6.743	9.787	6.086	5.502	6.349	5.765	4.637	5.021	10.392	6.049	6.779	4.458	7.315	6.366
154.286	9.358	12.138	7.551	12.237	7.878	6.548	7.532	6.714	7.907	8.222	5.322	6.137	12.272	5.543	6.436	5.574	4.464	6.919			154.286	6.841	9.374	6.225	9.271	6.809	10.569	5.861	6.118	6.44	5.864	4.87	5.207	10.903	6.366	6.486	4.451	7.222	6.278
156.19	9.484	11.224	7.952	12.778	8.796	6.538	8.869	6.83	7.348	7.795	5.191	5.526	12.832	5.565	6.797	5.437	4.273	6.995			156.19	6.921	9.294	6.22	8.963	7.647	10.73	6.426	6.269	6.869	6.056	4.521	5.498	10.778	6.324	6.668	4.455	7.068	6.458
158.095	9.442	10.422	8.69	13.056	8.585	6.314	8.323	6.958	7.534	7.359	4.861	5.737	13.364	5.48	7.481	5.848	4.546	6.935			158.095	7.135	9.385	6.758	8.275	7.478	10.724	5.995	5.976	6.903	5.969	4.432	5.123	10.216	5.408	6.63	4.01	5.451	6.324
160	9.474	12.517	8.332	13.187	8.483	6.457	8.369	7.131	7.5	7.803	5.417	6.368	13.254	6.009	7.163	5.798	5.235	6.839			160	7.754	9.027	7.159	8.309	7.419	10.782	5.866	5.808	6.697	5.66	4.678	5.053	10.989	5.014	6.486	4.384	5	6.19
161.905	9.853	13.491	7.433	12.596	8.415	7.014	8.482	7.201	7.456	8.521	5.774	6.753	13.064	6.233	6.693	5.7	5.497	7.054			161.905	7.476	8.513	7.297	8.903	7.449	10.58	5.703	5.751	7.006	5.525	5.11	5.347	11.136	5.148	6.24	4.529	5.265	6.245
163.81	9.842	11.552	7.738	12.318	8.653	7.219	8.245	7.212	7.441	8.436	5.696	6.284	13.376	6.085	6.885	6.191	5.317	7.081			163.81	6.611	8.455	6.802	8.699	7.265	10.563	6.545	6.306	6.914	5.426	4.664	5.698	10.449	5.155	6.476	4.397	5.852	5.921
165.714	9.547	10.5	7.802	12.621	9.007	7.119	9.429	7.29	7.436	7.778	5.383	5.511	14.127	6.112	7.233	6.079	5.328	7			165.714	6.976	8.968	7.33	9.368	7.478	10.586	6.943	6.306	6.68	5.395	4.116	5.491	11.006	5.289	6.534	4.468	6.019	5.796
167.619	10.221	11.931	10.476	13.005	8.626	6.919	8.266	7.031	7.76	7.812	5.026	5.979	14.029	5.987	7.134	5.643	5.273	7.306			167.619	7.214	9.647	7.335	9.703	8.022	10.925	7.986	5.861	6.834	5.981	4.507	5.372	11.386	6.035	6.986	4.293	5.815	6.417
169.524	10.684	12.06	10.118	12.434	8.333	6.948	7.145	7.077	7.662	8.077	5.304	6.389	12.879	5.78	6.989	5.527	4.962	6.817			169.524	7.246	9.241	6.462	8.606	7.574	10.747	8.029	5.735	6.891	6.667	4.377	5.432	10.886	5.507	7.385	4.418	5.926	6.481
171.429	9.695	11.914	8.193	13.242	8.837	6.695	7.518	6.992	7.926	8.325	5.643	6.458	12.306	5.767	7.508	5.892	5.35	6.489			171.429	7.651	8.497	6.912	8.465	7.419	10.511	6.172	5.918	6.846	7.037	4.623	5.811	10.932	5.444	6.601	4.37	5.809	6.736
173.333	9.179	12.371	8.904	13.909	9.306	6.886	8.482	7.135	8.132	8.547	5.713	6.595	12.572	6.126	7.273	6.3	5.383	7			173.333	7.151	8.556	6.94	8.952	8.25	10.833	6.273	6.327	7.257	6.988	5.226	6.102	11.182	5.62	6.971	4.471	5.296	7.185
175.238	9.232	12.836	8.037	12.03	8.694	7.071	9.287	7.046	7.098	7.598	5.157	6.463	12.711	6.233	6.655	5.751	4.59	7.339			175.238	6.833	9.444	6.769	9.424	8.397	11.161	7.483	6.294	7.343	6.827	4.719	5.66	11.466	5.366	7.096	4.67	5.019	6.968
177.143	8.758	12.655	10.123	11.763	7.973	6.619	8.27	6.788	7.191	7.026	5.235	6.689	12.422	6.103	6.888	5.44	4.694	7.253			177.143	7.579	9.294	7.154	9.212	8.037	11.718	8.502	5.959	6.777	6.426	4.384	5.712	11.591	5.437	6.721	4.488	4.895	6.468
179.048	8.621	12.207	10.519	12.399	8.048	6.424	7.699	6.88	7.824	7.906	5.357	6.753	11.624	5.861	7.222	5.599	5.066	6.919			179.048	8.222	9.005	7.247	8.561	7.456	10.759	7.804	5.91	6.697	5.778	4.781	5.512	10.83	5.317	6.832	4.593	5.259	6.44
180.952	9.284	12.56	8.118	12.727	8.116	6.557	8.734	6.969	7.946	8.154	5.565	6.021	12.503	5.973	7.013	5.625	5.317	6.785			180.952	8.333	10.139	6.786	8.762	7.118	9.782	6.445	6.135	6.36	5.525	5.014	4.884	10.761	5.415	6.87	5.02	6.327	6.208
182.857	9.853	13.043	7.658	12.242	8.095	7.076	8.411	6.919	7.466	8.137	5.73	5.616	13.74	6.166	6.866	5.596	5.388	6.586			182.857	7.651	10.299	6.813	9.61	7.963	9.575	6	5.967	6.549	5.34	4.849	5.095	11.642	5.458	6.995	4.96	5.994	5.815
184.762	9.284	13.302	7.439	12.04	8.156	6.962	10.181	6.637	6.779	8.171	4.835	5.826	13.046	5.489	6.765	5.491	4.77	6.801			184.762	7.262	10.15	7.121	9.636	8.199	9.138	6.708	5.849	6.949	6.049	4.795	5.446	12.205	5.12	6.716	4.306	5.549	6.255
186.667	9.179	12.078	7.476	12.535	7.531	6.2	12	6.714	7.083	8.017	5.287	6.484	12.243	5.422	6.717	5.534	4.661	7.328			186.667	7.429	9.925	7.038	9.517	7.632	9.075	7.589	6.404	7.434	6.333	4.63	5.358	11.653	5.296	6.409	4.259	5.815	6.333
188.571	9.179	10.284	7.31	12.692	6.884	6.462	11.72	6.494	7.554	7.701	6.365	6.668	11.983	5.803	6.989	5.693	4.607	7.247			188.571	7.619	9.037	7.198	9.651	7.971	8.736	7.33	6.18	7	5.802	4.377	5.323	11.278	5.345	6.433	4.963	5.426	6.454
190.476	8.884	10.922	7.578	12.106	8.068	6.638	11.972	6.568	7.721	8.094	5.887	6.211	12.116	5.848	6.904	5.451	4.464	6.823			190.476	7.968	8.332	6.802	9.011	8.61	8.437	6.804	6.049	6.229	5.506	4.507	5.2	11.455	4.838	6.726	4.822	5.401	6.574
192.381	9.916	11.836	7.765	11.5	8.17	6.533	11.035	6.571	7.275	8.265	5.061	6.126	12.197	5.874	6.479	5.415	4.525	7.188			192.381	7.746	8.219	6.341	9.271	8.765	8.109	6.876	6.453	6.777	5.92	4.281	5.218	11.585	4.852	6.76	4.397	5.519	6.509
194.286	10.368	10.56	7.027	11.591	8.313	6.533	10.762	6.34	7.603	7.65	4.87	6.516	12.04	6.072	6.492	5.437	4.678	7.726			194.286	7	8.626	7.082	9.591	8.059	7.822	6.804	6.188	6.663	6.111	4.048	5.372	11.795	5.077	6.486	4.717	5.08	5.981
196.19	9.674	10.802	7.524	12.429	9.299	6.629	12.096	6.695	8.191	8.043	4.939	6.926	12.035	6.345	6.869	5.444	5.153	7.505			196.19	7.262	8.861	7.412	9.208	7.956	8.023	7.048	5.988	6.103	6.142	4.473	5.281	11.432	5.437	6.582	4.795	4.654	6.005
198.095	9.611	11.44	8.086	12.798	9.367	6.795	12.291	6.548	8.191	8.368	5.148	6.684	12.289	6.049	6.703	5.729	5.082	6.957			198.095	7.857	8.61	6.967	8.654	7.831	7.805	7.239	6.114	6.531	5.92	4.815	5.06	10.625	4.965	6.284	4.458	4.617	6.347
200	9.442	11.509	8.289	12.404	9.102	6.281	11.592	6.772	8.27	8.026	4.983	6.432	12.52	5.758	6.631	5.711	4.918	6.984			200	7.429	8	6.407	8.338	7.618	7.316	6.368	5.837	7.109	5.704	5.171	4.961	10.801	5.042	5.981	4.468	4.926	6.514
201.905	9.316	12.448	8.439	12.081	8.653	6.529	11.493	6.896	7.946	7.393	5.13	6.853	13.127	5.717	6.936	5.874	4.738	7.409			201.905	7.127	7.754	6.725	8.773	7.588	7.103	6.158	5.853	6.629	5.685	5.062	5.393	10.955	5.099	6.024	4.842	5.605	6.481
203.81	9.484	12.241	7.556	11.773	8.347	7.11	10.996	6.703	7.662	7.692	5.217	6.521	12.913	5.354	6.952	5.758	4.628	7.22			203.81	7.413	8.037	6.819	9.063	7.61	6.879	6.813	5.714	6.337	5.167	4.63	5.396	10.523	4.437	6.582	4.852	5.951	6.097
205.714	10.168	10.828	7.337	12.237	8.537	6.9	11.021	6.633	7.667	8.145	4.835	5.842	12.572	5.283	6.773	5.35	4.754	6.543			205.714	7.087	8.38	6.901	9.394	8	7.333	7.005	5.776	6.783	5.765	4.527	5.27	11.011	5.127	6.803	4.842	5.432	6.014
207.619	10.274	10.276	8.193	12.343	8.313	6.505	11.472	6.649	7.392	6.923	4.67	6.089	12.532	5.691	6.543	5.206	4.814	6.516			207.619	7.04	8.096	7.165	9.007	8.206	7.511	6.962	5.837	6.657	6.167	4.562	5.365	11.301	5.183	6.702	4.764	4.235	6.051
209.524	8.905	10.707	8.636	11.747	8.095	6.881	11.993	6.174	6.824	7.017	4.983	6.305	12.503	5.825	6.19	5.289	4.601	6.731			209.524	7.556	8.005	6.863	8.141	7.853	7.006	6.163	5.678	6.149	5.66	4.397	5.004	11.028	4.62	6.803	4.407	4.111	6.338
211.429	8.768	11.483	13.353	11.97	8.966	7.143	11.17	6.193	7.123	8.009	5.374	5.774	12.231	5.83	6.382	5.195	4.426	6.801			211.429	8.151	8.39	7.407	8.989	7.985	7.006	6.01	5.959	7.069	5.586	4.815	4.916	11.284	4.901	6.784	4.259	4.852	6.134
213.333	9.632	11.112	13.663	12.54	9.048	7.043	10.248	6.703	7.73	8.299	5.365	6.016	12.301	5.825	7.024	5.697	4.628	6.898			213.333	8.373	8.396	8.681	9.305	7.654	6.626	5.866	6.114	7.68	5.469	4.74	5.042	10.949	4.803	6.798	4.155	4.969	5.713
215.238	11.379	10.672	8.695	12.747	8.463	6.705	9.316	7.069	7.755	7.863	5.435	6.737	12.96	5.892	7.243	5.87	4.694	6.645			215.238	7.667	8.631	8.159	8.32	6.449	6.517	5.545	5.763	6.68	5.352	4.13	4.768	10.278	4.852	5.962	3.946	5.136	5.69
217.143	11.116	11.741	8.07	12.106	8.408	6.514	7.947	7.046	7.647	7.684	5.522	6.437	13.145	5.655	6.944	5.505	4.962	6.645			217.143	6.841	8.171	6.665	8.349	6.5	6.971	6.081	5.547	6.291	5.611	4.103	5.095	10.278	5.049	5.817	4.081	5.074	5.847
219.048	9.589	11.379	7.92	11.843	8.578	6.719	8.936	6.691	7.49	7.778	4.704	5.737	12.382	5.457	6.535	5.505	5.038	5.849			219.048	7.389	7.989	7.011	8.84	7.456	6.701	6.081	5.522	6.08	5.957	4.274	5.225	10.92	5.225	5.846	3.832	5	5.75
220.952	9.474	10.862	9.166	11.616	7.898	6.581	9.706	6.834	7.23	7.838	4.4	6.037	12.243	5.704	6.676	5.375	4.82	5.731			220.952	7.873	8.123	7.599	8.978	7.919	6.351	5.799	5.943	6.349	6.191	4.308	4.881	11.369	5.141	5.957	3.599	5.457	5.991
222.857	9.147	12.293	9.187	12.298	8.116	7.171	8.961	6.88	7.647	8.821	5.461	6.516	12.89	5.928	6.906	5.26	4.984	6.699			222.857	7.437	8.342	7.374	8.695	7.331	6.155	6.172	5.824	6.411	6.278	4.445	5.253	10.693	5.014	6.611	3.872	4.827	6.227
224.762	9.232	12.026	9.053	12.495	8.32	7.067	7.943	6.942	8.113	8.872	5.583	6.205	12.202	6.48	6.61	5.289	5.273	6.995			224.762	7.706	9.005	6.995	8.387	7.301	6.638	6.325	5.229	6.229	5.951	4.267	5.249	10.517	5	6.202	4.205	4.432	6.222
226.667	9.642	10.5	8.695	11.692	8.02	6.233	7.309	6.691	7.868	8.333	5.565	5.826	12.335	6.076	6.361	5.126	4.891	6.785			226.667	7.659	8.251	6.462	8.517	8.044	6.902	6.211	5.58	6.606	5.531	3.815	4.94	10.528	4.535	5.649	4.471	4.253	6.222
228.571	9.926	12.836	7.781	11.98	7.891	6.657	6.979	6.436	7.206	8.53	5.591	5.889	12.746	5.35	6.377	4.895	4.552	6.457			228.571	7.024	7.642	5.868	8.305	7.882	6.448	6.584	5.857	6.937	5.765	3.979	5.312	10.341	4.81	5.663	4.266	4.321	6.329
230.476	9.2	13.198	8.267	11.323	7.211	6.676	7.004	6.68	7.225	8.521	5.226	5.926	12.266	5.197	6.168	5.011	4.399	6.156			230.476	6.714	7.963	6.176	8.409	6.824	6.356	6.943	5.673	6.914	6.272	4.514	5.042	10.812	5.077	6.12	4.138	5.08	5.898
232.381	8.558	11.259	8.182	11.197	7.354	6.033	7.415	6.448	7.078	8.034	4.661	5.911	12.156	5.058	5.786	4.755	4.268	6.312			232.381	7.302	8.048	6.621	8.814	6.603	6.609	7.636	5.571	7	6.148	5.007	5.228	11.33	5.12	6.423	4.431	5.179	5.838
234.286	8.347	12	7.85	11.823	7.571	5.895	7.128	6.22	7.328	7.479	4.843	5.489	12.029	5.318	5.979	4.693	4.716	6.973			234.286	7.817	8.075	7.17	9.097	7.831	6.966	7.555	5.673	7.286	5.617	4.651	5.389	11.148	5.141	6.913	4.923	5.031	6.185
236.19	8.032	12.147	7.813	11.348	7.367	6.233	6.975	6.417	7.172	6.821	5.165	5.111	12.006	5.803	6.372	4.704	4.546	6.392			236.19	7.968	7.963	7.005	8.595	7.846	6.874	6.579	5.669	6.823	5.556	4.301	4.846	10.915	4.88	6.76	5.121	5.222	6.329
238.095	8.484	11.431	7.866	11.551	8.156	6.129	7.085	6.236	6.608	6.641	4.93	5.368	12.017	5.933	6.163	4.538	4.448	6.027			238.095	7.611	8.048	6.819	8.673	6.728	6.328	6.77	5.939	6.091	5.864	4.548	5.063	10.557	4.993	6.192	4.69	5.29	6.366
240	8.968	10.767	7.332	11.758	7.891	6.305	7.199	6.143	6.789	6.752	4.948	5.637	12.624	5.516	6.193	5.022	5.104	6.505			240	7.167	8.139	6.973	9.509	6.875	6.224	8.45	5.816	5.891	5.895	4.205	5.34	10.926	5.028	6.635	4.589	4.691	6.144
241.905	9.032	10.716	8.337	10.803	6.857	6.614	7.66	5.946	6.779	6.504	4.939	6.042	12.341	5.489	6.73	5.469	4.967	7.075			241.905	7.73	7.775	6.077	8.836	7.243	6.557	7.665	5.543	6.086	5.833	3.788	5.095	11.074	5.035	6.587	4.114	4.302	6.157
243.81	9.884	11.017	8.861	11.278	7.075	6.11	7.135	6.185	7.064	6.915	5.061	6.447	11.775	5.426	6.799	5.336	4.738	7.016			243.81	7.405	8.203	6.044	8.271	7.279	6.144	6.301	6.22	6.554	5.883	4.199	5.161	10.239	5.021	6.591	3.923	4.401	6.139
245.714	9.937	19.233	7.947	12.207	7.333	5.81	7.067	6.772	7.691	7.513	5.122	6.179	12.231	5.327	6.61	5.17	4.962	6.903			245.714	7.635	8.85	6.44	8.257	7.831	5.822	6.751	6.302	7.149	5.963	4.548	6.032	10.847	5.606	6.697	4.539	5	6.134
247.619	7.747	21.431	8.048	11.763	7.524	6.148	7.44	6.853	7.475	7.034	4.861	6.079	12.006	6.233	6.241	5.202	5.202	6.71			247.619	8.46	8.818	6.929	7.81	8.132	6.351	6.713	6.016	6.96	5.66	4.514	6.112	11.159	5.894	6.375	4.535	5.105	6.088
249.524	8.674	15.862	8.294	12.081	8.585	6.448	7.259	6.714	7.51	7.171	4.983	5.816	11.994	6.493	6.674	5.368	5.093	6.844			249.524	7.238	8.471	7.17	8.268	7.228	6.132	6.335	5.571	6.703	5.66	4.384	5.642	10.193	5.507	6.543	4.475	4.741	6.148
251.429	10.653	14.259	7.941	12.212	8.878	6.429	7.035	6.27	7.824	7.872	4.652	6.042	12.127	5.897	7.195	5.361	4.88	6.935			251.429	6.294	8.588	7.132	8.952	6.912	5.477	6.01	5.38	6.903	5.759	4.151	5.47	9.79	5.113	6.808	4.572	4.377	5.931
253.333	11.253	12.009	7.636	11.793	8.442	6.395	6.954	6.371	7.074	7.624	4.678	6.295	12.092	5.735	6.65	5.448	5.115	6.677			253.333	7.079	9.059	6.923	9.007	8.059	5.546	6.416	5.539	7.109	5.642	4.158	5.098	10.17	4.683	6.442	4.663	4.679	6.056
255.238	10.663	13.112	7.829	11.98	8.211	5.748	6.606	6.463	6.245	7.632	5	5.895	12.85	5.726	6.281	5.372	4.563	6.699			255.238	8	8.989	6.286	9.301	8.735	6.178	6.608	5.502	7.029	5.525	4.87	5.168	11.472	5.183	6.188	4.936	5.37	6.519
257.143	9.537	13.759	7.487	11.328	7.878	5.576	6.83	5.78	6.358	7.556	5.043	5.758	12.763	5.516	6.353	5.101	4.235	6.468			257.143	8.563	8.225	6.775	9.796	8.228	6.828	7.608	5.551	6.714	5.025	4.938	5.646	12.165	5.697	6.962	4.774	5.549	6.708
259.048	9.484	11.716	7.396	11.621	7.599	5.724	7.33	5.992	6.75	7.419	4.922	5.842	12.618	5.91	6.658	5.184	4.863	6.328			259.048	7.397	7.439	6.758	9.636	8.419	6.626	7.828	5.461	6.566	5.525	4.76	5.793	11.858	5.437	7.197	4.707	5.198	6.824
260.952	9.042	11.371	7.904	12.152	7.776	6.133	7.376	6.49	7.167	7.872	5.017	5.947	12.104	6.309	6.465	5.65	4.787	6.489			260.952	7.024	8.385	7.137	9.368	8.721	6.362	8.316	5.89	6.749	5.975	5.027	5.73	11.716	5.451	6.837	5.189	4.92	6.625
262.857	8.789	11.267	9.471	10.955	7.769	7.167	7.713	6.653	7.892	8.231	5.322	5.989	11.006	6.184	6.829	5.801	4.683	6.677			262.857	7.984	8.652	7.945	9.442	7.912	6.81	9.301	6.057	6.377	5.58	4.863	5.621	10.847	5.465	6.587	4.758	5.265	6.245
264.762	9.663	10.931	9.797	11.04	7.415	6.948	7.369	6.378	7.73	8.726	4.965	5.958	12.329	6.112	6.799	5.181	4.787	6.269			264.762	8.04	7.417	7.313	8.58	7.206	6.575	7.565	5.955	6.194	5.475	4.541	5.13	10.148	5.352	6.875	4.054	5.364	5.907
266.667	9.305	10.276	7.615	11.5	7.735	6.167	6.922	5.815	7.034	8.641	4.409	5.847	13.168	6.78	6.144	4.78	4.525	6.435			266.667	7.952	7.85	6.929	8.602	7.368	6.351	6.459	5.665	6.429	5.87	4.664	4.681	10.807	4.852	6.889	4.057	4.815	5.968
268.571	8.547	9.371	6.738	11.884	7.456	6.105	8.149	6.375	6.794	8.427	4.583	6.016	12.526	7.498	6.594	4.953	4.568	6.667			268.571	7.421	8.07	7.033	9.145	7.64	6.454	6.081	5.82	6.48	6.142	4.514	5.284	11.216	4.866	6.389	4.279	4.525	6.245
270.476	8.674	10.586	7.642	12.01	7.347	5.986	8.585	6.811	6.623	8.308	5.026	5.942	11.636	7.52	6.706	4.661	4.989	6.462			270.476	7.294	7.497	6.577	8.535	7.846	6.305	6.574	5.849	6.491	6.074	4.493	5.467	11.034	4.923	6.683	4.522	4.29	6.556
272.381	9.568	11.112	7.604	11.475	7.571	5.833	7.66	7	6.912	7.701	4.661	5.868	11.509	7.251	6.35	4.592	5.29	6.667			272.381	7.865	7.545	6.934	8.755	7.625	6.086	6.78	5.588	6.697	6.173	5.007	5.26	11.267	4.38	7.082	5.168	4.543	6.282
274.286	10.063	10.405	6.802	11.606	7.626	5.695	7.511	7.131	7.206	7.256	4.052	5.853	12.006	6.731	6.492	4.83	5.47	6.527			274.286	8.294	6.925	7.005	8.963	7.404	6.443	6.689	6.327	7.023	6.222	4.979	5.298	11.045	4.211	6.832	5.29	5.259	5.676
276.19	8.926	10.784	7.358	12.202	8.014	5.457	7.131	6.282	6.853	7.137	4.417	6.121	12.133	7.036	6.42	4.816	5.355	6.489			276.19	8.556	7.791	6.923	8.799	7.772	6.759	6.895	6.261	6.514	6.08	4.534	5.386	11.273	5.007	6.495	4.519	5.025	6.241
278.095	9.358	11.612	7.727	12.04	8.15	5.795	6.677	5.985	6.848	7.06	4.965	6.821	12.197	7.265	6.38	4.892	5.005	6.925			278.095	8.571	8.267	7.544	9.357	8.007	6.523	6.636	5.42	6.229	6.543	4.315	5.618	11.136	5.62	6.144	4.148	4.049	6.824
280	10.779	13.569	7.872	12.045	7.973	6.381	7.131	6.683	7.152	7.419	4.757	6.347	12.821	6.96	6.396	5.466	4.809	6.898			280	8.087	7.385	7.242	9.372	8.066	5.914	6.201	5.376	5.994	6.556	4.021	4.961	10.102	4.958	6.048	4.121	4.414	6.19
281.905	10.779	13.552	8.337	12.97	7.646	6.481	7.489	7.008	7.647	8.265	4.704	6.142	13.584	7.538	6.487	5.856	5.421	6.952			281.905	7.349	7.61	6.89	9.097	8.397	5.069	5.89	5.771	6.126	6.167	4.384	4.804	10.602	4.648	6.611	4.444	4.907	5.856
283.81	9.579	10.767	7.722	12.616	7.497	6.233	7.294	6.541	7.5	8.06	5.33	6.532	12.543	8.108	6.701	5.3	5.355	6.78			283.81	7.04	7.84	6.956	8.822	8.029	5.08	5.861	5.951	6.869	6.074	4.842	5.196	11.312	4.754	6.269	4.62	4.895	6.269
285.714	9.632	10.828	7.813	11.702	7.83	6.052	7.177	6.286	7.054	6.889	5.643	6.437	11.671	7.646	6.521	5.159	4.749	6.532			285.714	7.31	8.834	7.643	9.1	7.257	6.069	6.249	5.951	7.331	6.42	4.884	5.133	10.977	5.669	6.212	4.404	4.815	6.292
287.619	9.632	15.172	7.781	11.374	8.429	5.943	6.223	6.382	6.765	6.718	5.417	6.016	11.85	7.094	6.158	4.978	4.459	6.468			287.619	7.278	8.668	7.709	9.546	6.971	6.333	7.005	6.065	6.96	6.117	4.884	5.432	10.864	5.873	6.548	4.431	4.833	6.19
289.524	8.463	16.853	7.342	11.47	8.789	5.933	5.752	5.931	6.382	7.026	4.826	5.579	11.861	5.991	6.366	4.733	4.464	6.715			289.524	7.5	7.214	6.736	9.16	7.088	5.73	6.928	6.114	6.411	5.877	4.651	5.13	11.125	4.972	6.135	4.66	4.901	6.167
291.429	8.337	13.293	7.513	11.419	7.823	6.481	5.918	5.49	6.534	6.684	4.53	5.589	11.994	5.762	6.401	5.018	4.694	7.065			291.429	7.484	7.118	6.148	8.862	7.096	5.971	7.321	5.918	6.577	5.698	4.315	5.102	11.631	4.669	5.909	4.63	4.167	5.588
293.333	8.968	11.922	7.727	11.551	7.299	6.5	5.869	6.181	7.471	6.778	4.774	6.089	12.225	6.525	6.639	5.708	4.831	7.296			293.333	7.571	7.406	6.555	8.84	7.404	6.08	8.024	5.327	6.909	5.728	4.534	4.926	11.523	4.796	6.188	4.192	4.105	5.301
295.238	8.379	11.776	9.471	12.111	8.041	6.429	5.546	6.332	7.539	6.949	4.713	6.4	12.353	6.215	6.553	5.487	4.645	7.075			295.238	7.579	7.706	6.527	8.673	7.066	5.816	7.986	5.731	6.68	6.377	4.288	4.93	11.25	5.035	6.356	3.946	4.685	5.819
297.143	8.116	11.5	15.348	11.833	7.755	6.248	5.918	5.815	6.716	7.034	4.948	6.1	12.058	5.919	6.348	4.964	4.268	6.425			297.143	7.286	8.417	6.445	8.933	7.015	5.816	7.459	5.927	6.229	6.611	3.993	5.375	10.966	5.106	6.577	4.185	4.759	5.884
299.048	8.968	11.853	14.807	11.778	7.054	6.105	6.688	6.29	6.897	7.915	5.078	6.011	12.775	6.709	6.939	5.26	4.689	6.274			299.048	7.484	8.872	6.962	8.758	7.757	5.862	6.565	5.176	5.84	6.315	4.082	5.246	10.636	4.535	6.774	4.502	4.315	5.199
300.952	9.021	11.19	8.422	12.263	7.932	5.795	6.404	6.475	7.338	7.111	4.696	6.142	12.468	7.126	6.709	5.141	5.235	5.978			300.952	7.73	8.898	7.231	8.141	7.559	6.092	6.22	5.302	6.103	6.302	4.541	5.607	11.068	5.254	6.524	4.603	4.432	5.194
302.857	8.305	10.259	7.797	12.626	9.041	5.31	6.238	6.417	7.015	7.009	5.026	6.689	11.705	7.143	6.324	4.903	5.027	6.301			302.857	7.944	8.652	7.055	8.595	7.301	6.517	6.488	5.841	7.057	6.667	4.685	5.793	11.335	5.479	6.188	4.677	4.889	6.144
304.762	8.674	10.362	8.257	13.646	8.531	5.89	6.372	6.525	7.123	6.949	5.774	7.021	12.509	7.668	6.473	4.812	5.126	6.683			304.762	7.675	8.219	7.027	9.283	7.397	5.994	6.311	6.212	7.303	6.438	4.452	5.232	11.472	4.901	6.942	4.586	4.673	6.509
306.667	8.842	9.112	7.31	14.737	7.741	5.967	5.798	6.174	7.132	6.47	5.365	6.042	12.254	7.404	6.294	4.585	5.197	6.269			306.667	8.048	7.508	7.451	9.532	7.904	5.592	5.895	5.865	6.8	7.025	4.63	6.046	11.915	5.148	7.192	4.448	4.37	6.694
308.571	8.2	8.81	7.059	16.465	7.299	6.024	5.539	6.228	7.02	7.094	5.07	5.816	11.798	7.363	6.305	4.563	5.568	6.532			308.571	7.968	7.198	7.049	9.1	7.956	5.448	5.885	5.51	6.08	7.185	4.24	6.147	11.403	4.761	6.471	4.566	4.747	6.56
310.476	8.589	10.31	7.305	18.763	6.871	6.262	5.73	6.521	7.412	6.325	5.348	5.837	11.191	7.004	6.409	4.765	5.94	6.634			310.476	7.333	7.759	7.242	8.591	7.61	5.293	6.445	5.322	5.983	6.309	4.521	5.396	10.75	4.979	6.904	4.741	5.099	6.426
312.381	8.874	10.888	7.166	20.854	7.361	5.757	5.645	6.351	7.49	5.726	5.261	5.842	11.497	6.121	6.016	4.787	5.098	6.301			312.381	7.095	8.273	7.736	8.918	7.721	5.649	6.522	5.106	6.434	6.006	4.945	5.653	11.136	4.901	6.909	4.35	5	6.065
314.286	8.389	9.034	6.674	22.01	7.673	5.981	5.723	6.475	7.127	5.812	5.365	5.826	12.214	5.574	6.27	4.57	4.743	6.462			314.286	7.603	7.321	6.962	8.528	7.022	5.31	6.483	5.433	6.446	5.92	4.336	5.389	11.205	4.669	6.255	3.99	4.63	5.648
316.19	7.505	9.44	6.642	23.939	7.619	5.752	5.61	6.405	6.588	6.547	4.591	5.716	11.595	6.408	6.364	4.625	4.978	6.452			316.19	8.397	7.176	6.269	8.022	6.89	4.971	6.01	5.739	5.954	6.136	4.281	5.509	11.676	4.789	6.356	4.084	4.568	6.227
318.095	7.295	9.845	6.968	26.793	7.551	5.548	5.528	6.085	6.672	7.162	4.478	5.884	10.867	6.937	5.92	4.787	5.027	6.704			318.095	7.897	8.005	6.456	8.539	7.588	5.822	5.895	5.698	5.949	6.636	4.74	4.975	11.682	4.782	6.236	4.444	5.043	6.426
320	8.547	9.241	7.209	28.54	6.952	5.61	5.631	6.108	6.603	7.744	4.983	5.405	11.647	6.794	6.15	4.646	4.628	6.581			320	7.23	7.701	6.83	8.84	7.463	5.764	6.12	5.478	6.109	6.691	4.301	4.565	10.71	4.718	6.178	4.364	4.66	6.065
321.905	9.663	10.112	7.743	29.535	7.245	5.438	5.872	6.788	6.696	7.179	5.07	5.316	11.855	7.166	6.053	5.069	4.716	6.419			321.905	7.341	7.781	7.104	8.822	6.581	5.483	6.268	5.404	5.846	6	3.801	4.66	10.739	4.092	6.317	4.061	4.093	5.495
323.81	9.621	10	8.107	30.394	7.51	5.771	6.216	6.958	6.819	6.761	5.07	6.163	11.763	6.753	6.131	5.282	4.962	6.817			323.81	7.595	8.155	6.709	8.621	6.978	5.713	6.641	5.429	6.177	5.5	3.945	4.947	11.21	4.408	6.192	4.118	3.827	5.356
325.714	9.137	9.698	7.428	29.591	7.51	5.795	6.202	6.181	6.554	7.085	4.635	6.095	12.023	6.422	6.265	4.567	4.355	6.656			325.714	7.579	8.043	6.555	8.71	7.669	5.362	6.287	5.437	6.36	6.031	4.24	4.835	11.068	4.718	6.149	4.421	4.086	5.56
327.619	9.579	9.293	7.011	29.364	7.939	5.667	6.152	6.185	6.828	6.957	4.278	5.711	11.457	6.193	6.294	4.805	4.246	6.36			327.619	7.468	8.663	6.901	9.353	7.206	5.805	7.144	6.053	6.56	6.92	4.712	4.832	10.943	4.606	6.12	4.401	4.883	6.213
329.524	9.663	9.543	11.46	30.571	8.238	5.91	5.996	6.417	7.049	7.06	4.087	5.632	11.746	5.641	6.07	5.022	4.191	6.011			329.524	7.405	8.016	6.786	9.197	7.125	6.138	8.053	6.233	6.943	6.784	4.637	5.046	11.006	4.697	6.26	4.391	4.802	6.301
331.429	9.347	9.836	11.668	29.434	8.184	6.062	5.493	6.255	7.059	7.829	4.322	5.821	12.312	5.404	5.987	4.942	4.279	6.376			331.429	7.976	7.765	7.148	8.781	7.331	5.747	7.512	5.796	6.589	6.691	4.404	4.846	10.534	4.817	6.462	4.155	4.698	6.069
333.333	8.811	9.491	7.738	27.258	7.946	5.986	5.777	6.232	7.172	7.863	4.617	5.968	12.312	5.601	6.361	4.949	4.497	6.688			333.333	8.595	8.353	8.17	8.829	7.728	5.971	7.919	5.878	6.777	6.951	4.651	5.354	11.165	5.169	6.534	4.549	4.84	6.403
335.238	8.137	9.517	7.775	25.636	7.633	6.105	5.83	6.027	6.931	7.231	4.904	6.021	12.347	5.946	6.57	4.856	4.213	6.468			335.238	7.635	7.743	7.923	8.911	8.074	6.155	8.474	5.335	6.754	6.377	4.993	5.214	11.955	4.782	6.779	4.848	4.827	6.296
337.143	8.832	10.06	8.187	23.949	7.218	6.286	5.592	5.819	6.554	6.897	4.991	5.9	11.78	6.063	6.46	4.845	4.235	6.301			337.143	7.294	7.091	6.615	8.773	7.699	6.264	9.057	5.2	6.737	5.796	4.938	4.979	11.432	4.894	6.596	4.226	4.877	6.134
339.048	8.979	9.871	7.845	22.909	8.082	5.719	5.784	5.656	6.265	6.547	4.913	5.737	12.497	5.848	6.318	5.018	4.186	6.484			339.048	8.016	6.797	6.764	8.955	7.559	5.828	9.282	5.682	6.566	5.877	4.664	5.73	11.233	5.592	6.649	4.192	4.796	6.713
340.952	8.684	9.914	7.786	21.177	8.204	5.414	5.716	6.251	6.544	6.838	5.478	5.842	13.249	5.462	6.42	4.989	4.541	7.027			340.952	7.69	6.963	7.099	9.294	8.029	5.713	8.426	5.722	6.011	5.895	4.493	6.081	10.949	5.606	6.49	4.313	5.302	6.806
342.857	8.884	9.431	7.781	18.848	7.884	5.719	5.358	6.425	7.118	7.197	5.496	5.595	12.046	5.251	6.254	4.935	4.607	6.608			342.857	7.937	7.107	7.22	8.993	8.176	5.776	9.263	6.016	5.709	5.519	4.13	5.14	10.312	4.535	6.173	4.283	5.364	6.074
344.762	9.484	8.974	7.203	16.884	8.361	5.776	5.344	6.077	7.025	6.607	4.878	5.947	11.838	5.767	6.16	4.993	4.355	6.382			344.762	7.802	7.364	6.995	8.561	7.853	5.925	9.636	6.563	5.469	5.278	3.788	4.625	10.915	4.211	6.51	4.313	5.025	5.903
346.667	9.768	9.328	7.316	15.237	8.265	5.881	5.518	6.282	6.74	6.598	4.626	6.011	11.734	6.175	6.479	5.029	4.82	6.478			346.667	7.206	7.743	6.637	8.58	8.221	6.356	8.656	6.539	6.051	5.253	4.219	5.512	11.767	5.232	7.144	4.808	4.889	6.444
348.571	9.211	9.526	7.604	14.48	7.912	5.933	5.67	6.154	6.328	6.786	4.322	5.747	12.445	5.632	6.142	4.809	4.557	6.763			348.571	7.722	7.743	6.857	8.532	8.794	5.81	8.182	5.878	6.371	5.414	4.829	5.593	11.568	5.239	7.13	4.791	4.648	6.495
350.476	8.726	9.672	7.342	13.273	7.884	5.567	5.546	6.394	6.456	6.137	3.983	6.084	12.717	5.332	5.757	4.531	3.918	6.543			350.476	7.825	7.283	6.681	8.732	8.272	5.362	8.431	5.404	6.554	5.58	4.247	4.582	10.727	4.62	6.596	4.303	4.802	6.574
352.381	9.158	10.034	6.909	12.288	8.054	5.414	5.61	6.151	6.426	6.547	4.626	6.174	12.243	5.448	6.115	4.585	4.295	6.387			352.381	7.627	7.364	6.896	8.888	7.632	5.58	8.99	5.486	6.72	5.852	3.705	4.639	10.92	4.746	6.409	4.343	4.92	6.227
354.286	9.305	9.491	6.759	12.46	7.823	5.59	6.067	5.355	6.127	6.41	4.991	5.916	11.925	5.094	6.056	4.585	4.038	6.828			354.286	8.349	7.738	7.17	8.654	7.162	6.253	9.273	5.588	6.817	6.315	4.342	5.295	11.869	5.176	6.562	4.62	4.914	5.898
356.19	9.263	8.474	6.818	11.949	7.823	5.376	5.876	5.552	6.402	6	4.496	6.332	11.96	4.996	5.941	4.805	4	6.371			356.19	8.127	7.358	6.929	8.866	7.412	6.454	8.933	5.624	7.217	7.13	4.747	5.544	11.915	4.887	7.173	4.835	4.759	5.94
358.095	9.095	8.319	6.963	11.253	8.068	5.562	5.667	5.749	6.819	6.53	4.243	6.274	11.792	5.148	5.805	4.884	4.437	5.871			358.095	7.802	7.433	7.132	9.089	7.588	6.368	8.278	5.869	6.989	7.185	4.733	5.614	11.54	4.634	7.481	5.077	4.926	6.199
360	8.684	8.422	6.984	11.116	7.912	6.152	5.989	5.467	6.701	6.932	3.974	5.705	12.468	4.915	5.952	4.765	4.257	6.038			360	8.056	8.46	7.324	9.152	7.39	6.529	9.115	5.829	6.394	6.685	4.726	5.607	11.148	5.246	7.005	4.798	5.414	6.264
361.905	9.084	8.509	6.834	11.49	7.333	6.181	6.326	5.39	5.956	7.239	4.113	5.411	16.509	5.283	6.126	4.625	3.902	6.452			361.905	7.865	8.594	7.225	8.981	7.559	6.184	9.828	5.78	6.491	6.617	4.699	5.439	11.023	5.521	6.442	4.589	4.901	6.023
363.81	9.516	9.026	6.46	12.323	7.034	5.838	5.876	5.846	5.931	6.547	4.496	5.268	16.983	5.417	6.34	4.646	3.984	6.172			363.81	8.119	8.642	7.429	9.086	7.426	6.31	8.483	5.706	6.371	6.673	4.884	5.189	11.386	5.408	6.524	4.892	4.574	6.19
365.714	9.253	9.103	6.963	12.732	7.136	5.776	5.567	5.753	6.328	7.145	4.4	5.242	14.555	4.897	6.353	4.661	4.328	5.86			365.714	7.532	8.888	7.676	9.546	7.36	6.293	8.096	5.792	6.086	6.944	5.096	5.27	11.5	5.458	6.62	4.916	4.821	6.199
367.619	9.189	9.112	7.214	11.955	7.272	5.705	5.447	5.355	6.441	7.419	4.304	5.789	13.509	5.009	6.225	4.845	4.202	5.962			367.619	7.976	9.219	7.313	9.632	7.529	5.948	8.416	6.188	6.457	6.852	4.959	5.474	11.784	5.958	6.091	4.596	4.883	6.384
369.524	8.968	10.078	7.578	11.318	7.456	5.49	5.812	5.822	6.77	6.376	4.765	6.226	13.353	5.552	6.505	5.412	4.224	6.355			369.524	8.675	9.561	6.846	9.149	7.919	6.144	8.445	6.212	7.171	6.123	4.568	5.554	11.812	5.972	6.812	4.798	5.16	6.569
371.429	9.074	10.707	7.663	11.187	7.918	6.224	6.326	5.83	6.902	6.615	5.07	6.021	17.058	5.57	6.639	5.668	4.142	6.14			371.429	7.976	9.16	7.302	9.093	7.603	6.397	8.971	5.931	7.051	6.173	4.548	5.274	11.903	4.986	6.764	4.525	4.796	6.204
373.333	9.537	10.474	7.535	11.424	8.279	6.862	6.067	6.266	6.922	6.41	4.843	5.774	15.838	5.157	6.693	5.347	4.301	5.86			373.333	7.302	8.283	7.038	9.138	6.985	6.575	8.459	5.767	6.714	6.019	4.384	5.126	11.938	5.035	6.558	4.199	4.963	6.106
375.238	8.947	10.207	7.481	11.949	7.816	6.424	6.188	6.432	6.603	5.778	4.852	5.684	12.653	5.457	6.473	5.17	4.574	6.226			375.238	7.159	7.877	6.698	8.955	7.478	6.017	7.507	5.841	6.703	5.469	4.274	5.253	11.472	4.958	7.284	4.498	5.407	6.431
377.143	7.947	11.181	6.877	11.687	7.85	6.21	5.872	6.1	6.559	5.564	5.157	6.074	12.965	6.076	6.04	4.939	4.541	5.806			377.143	7.365	7.85	6.995	9.201	7.699	5.701	6.833	5.714	6.697	5.71	4.5	5.225	10.977	4.93	6.803	4.293	4.944	6.13
379.048	8.474	11.448	7.23	11.49	7.782	6.348	5.348	6.517	6.534	5.923	4.939	6.489	14.139	5.7	5.842	4.964	4.399	5.86			379.048	7.659	8.829	6.841	9.052	7.265	5.529	5.718	5.551	6.703	5.907	5.24	5.246	10.585	5.352	6.543	4.33	4.512	6.231
380.952	9.347	11.31	7.053	11.717	7.837	6.243	5.723	6.228	6.564	6.684	4.939	6.432	15.121	5.596	6.053	5.079	4.158	6.586			380.952	7.397	8.781	7.099	8.981	7.434	5.845	5.368	6.029	6.463	5.944	4.89	5.196	10.517	5.028	6.644	4.751	4.648	6.551
382.857	8.621	12.457	7.08	10.924	7.878	5.914	6.025	5.73	6.495	7.12	4.87	5.974	13.358	5.596	6.061	5.119	4.093	6.78			382.857	7.159	8.262	7.016	9.041	7.199	6.029	5.665	5.906	6.406	5.883	4.315	5.635	10.676	5.246	6.486	4.835	5.056	6.653
384.762	8.105	12.069	7.251	10.561	7.98	6.119	6.167	5.876	6.029	7.085	4.957	6.479	12.382	5.475	6.075	5.054	4.23	6.366			384.762	7	8.182	6.929	8.892	6.912	5.69	5.301	5.212	6.337	7.179	4.199	5.849	10.665	5.303	6.856	4.37	5.216	6.722
386.667	9.189	11.672	9.075	11.227	7.408	6.281	5.606	6.154	6.691	6.88	5.348	6.568	12.601	5.933	6.211	4.625	4.486	6.398			386.667	6.952	8.39	7.082	8.565	7.213	6.178	5.689	6.302	6.56	7.753	4.082	5.554	10.528	5.282	6.986	4.522	5.136	5.991
388.571	9.674	13.069	9.749	11.556	6.646	6.343	5.709	6.633	7.475	7.051	5.33	5.647	12.688	5.475	6.479	4.628	4.404	6.71			388.571	7.032	8.925	7.088	8.766	7.125	5.96	6.158	6.751	6.789	6.617	4.493	5.386	10.631	4.979	6.707	4.869	5.025	5.778
390.476	9.568	15.569	7.84	11.313	7.531	6.481	6.528	7.147	7.26	7.94	5.183	6.516	13.353	5.229	6.564	5.101	4.661	6.909			390.476	7.111	8.524	7.61	9.368	7.169	5.833	6.282	5.984	6.577	6.253	4.685	5.684	10.847	5.056	6.678	4.586	4.969	6.389
392.381	10.116	16.422	7.615	11.308	7.782	6.529	6.163	6.753	7.054	8.06	5.104	6.537	13.208	5.103	6.364	5.213	4.82	6.699			392.381	7.635	7.84	7.797	9.48	7.5	6.161	6.292	6.037	6.914	5.79	4.801	5.604	10.926	5.042	6.75	4.593	4.833	6.31
394.286	9.6	14.552	7.289	11.96	7.224	6.51	5.78	6.363	6.873	7.726	5.113	5.784	12.173	5.108	6.128	5.184	4.546	6.57			394.286	7.77	8.348	7.511	9.639	8.713	6.218	6.01	6.114	7.92	6	5.123	5.481	11.511	5.099	7.49	5.071	4.994	6.468
396.19	9.074	11.966	7.615	11.843	7.102	6.286	5.766	6.471	7.098	6.94	4.713	5.947	12.266	5.197	5.917	5.065	4.896	6.86			396.19	8.381	8.824	7.868	9.784	9.037	6.408	5.799	6.151	7.246	5.84	5	5.375	12.517	5.134	7.673	5.222	5.426	6.597
398.095	9.116	11.767	8.021	11	7.707	5.743	5.897	5.958	7.304	6.863	4.374	5.495	12.133	5.126	5.992	4.957	5.104	6.731			398.095	8.183	8.332	7.67	9.58	8.044	6.218	5.565	6.212	6.12	5.451	5	5.66	12.71	5.007	7.442	5.094	5.216	6.44
400	8.326	11.75	6.968	10.258	8.224	5.529	5.525	5.826	6.98	7.538	4.33	5.247	11.832	5.278	6.16	5.202	4.874	6.581			400	8.024	8.727	7.5	9.368	7.596	6.121	5.756	6.306	5.977	6.099	4.658	6.186	11.818	5.81	7.183	4.636	4.352	6.935
401.905	8.663	10.759	6.481	10.581	8.007	5.743	5.053	5.606	6.441	7.214	4.696	5.037	11.514	4.883	6.163	5.022	4.557	6.731			401.905	8.476	8.465	7.775	9.591	7.14	5.931	5.904	6.273	6.32	6.623	4.705	6.154	10.864	6.014	6.702	4.451	4.407	6.833
403.81	8.958	10.922	7.102	11.333	7.776	5.5	5.053	5.506	5.897	6.393	4.626	5.358	11.549	5.435	5.58	4.729	4.284	6.398			403.81	7.849	8.225	7.511	8.903	7.25	5.816	5.852	5.894	6.949	6.333	4.473	5.747	11.205	4.768	6.611	4.677	5.123	6.653
405.714	8.442	10.397	7.406	11.222	7.565	5.69	5.206	5.734	6.02	6.239	4.452	6.174	12.416	6.018	5.658	4.668	4.033	6.038			405.714	6.714	7.658	7.176	8.632	8.456	5.724	5.507	5.837	6.931	5.722	4.315	5.361	10.875	4.979	6.317	4.758	4.907	6.25
407.619	8.726	10.741	7.93	11.232	7.789	5.924	5.876	5.463	6.363	6.342	4.974	6.216	11.96	5.991	6	4.736	3.88	5.747			407.619	6.794	7.578	7.038	9.275	8.882	5.586	5.445	5.437	6.366	5.42	4.63	5.242	11	5.556	5.933	4.771	4.29	6.324
409.524	8.505	12.259	8.07	11.157	8.435	5.743	6	5.556	6.24	6.385	4.826	5.953	11.116	5.637	5.89	5.336	3.765	5.925			409.524	7.452	8.39	7.225	9.584	8.103	5.851	5.469	5.367	6.44	5.265	4.596	5.211	11.392	5.204	6.663	4.747	4.852	6.644
411.429	9.158	13.241	8.112	11.045	8.034	5.648	7.482	6	6.809	6.974	4.548	5.863	17.827	5.57	6.104	5.184	4.383	6.769			411.429	8.373	7.861	7.599	9.732	7.632	6.603	6.014	6.335	7.131	5.407	4.719	5.337	10.989	5.444	7.236	5.088	5.481	6.361
413.333	9.526	12.578	8.059	11.162	7.435	5.59	7.55	6.224	7.25	7.675	4.591	6.384	23.855	6.143	6.607	5.166	4.809	6.989			413.333	8.738	7.701	7.599	9.55	7.949	6.282	6.239	6.596	7.074	5.802	4.664	5.677	10.949	5.401	6.861	5.229	5.284	6.255
415.238	8.211	11.862	7.749	11.333	7.503	5.748	5.965	6.066	6.99	7.692	4.635	6.474	17.913	6.058	6.858	5.523	4.809	6.876			415.238	8.032	7.925	7.253	9.022	7.478	5.868	5.469	6.376	6.914	5.883	4.733	5.67	10.778	5.197	6.697	4.855	4.722	6.532
417.143	8.379	11.914	7.219	11.697	8.286	6.267	6.021	6.127	6.975	6.966	5.243	6.353	13.931	6.009	6.628	5.303	4.76	6.844			417.143	7.952	8.005	6.736	9.052	6.61	6.374	4.981	6.355	6.223	6.204	4.863	5.312	10.784	4.979	6.702	4.566	4.389	6.273
419.048	9.326	12.543	7.032	11.328	8.429	6.286	6.074	6.649	7.377	6.538	5.07	6.326	14.364	6.099	6.396	5.31	4.842	6.731			419.048	7.865	8.759	7.06	9.524	7.125	6.506	5.378	6.073	5.903	6.938	4.486	5.347	11.659	4.93	7.048	4.374	5.056	5.546
420.952	9.095	11.991	7.337	11.429	8.204	6.205	6.149	6.757	7.564	7.043	4.374	6.032	15.173	5.758	6.578	5.444	4.82	5.952			420.952	7.992	8.604	7.956	9.126	7.206	5.73	5.641	5.886	6.457	7.093	4.801	5.526	11.807	5.077	8.202	4.401	5.593	5.949
422.857	8.442	10.44	7.31	12.338	8.082	6.433	6	6.568	7.034	7.436	5.391	6.311	18.104	5.628	6.749	5.274	4.514	5.817			422.857	7.825	8.326	7.956	8.55	7.309	5.052	5.775	5.796	6.406	6.716	4.637	5.253	10.676	4.965	8.721	4.431	5.395	6.218
424.762	9.274	10.345	8.283	12.328	8.347	6.962	5.957	6.846	6.627	6.991	5.574	6.568	17.127	5.897	7.102	5.401	4.77	6.312			424.762	7.19	8.332	7.549	8.368	7.331	5.103	5.536	5.31	6.383	6.068	4.082	4.821	9.898	4.655	8.202	3.97	4.698	5.986
426.667	10.505	10.802	8.471	12.505	8.361	6.981	6.535	7.359	7.083	7.094	5.348	6.979	15.22	6.309	7.152	5.213	4.858	6.651			426.667	6.817	8.861	6.896	8.766	6.868	5.385	5.234	5.253	6.697	5.623	4.288	5.091	10.17	4.444	9.188	4.051	4.864	5.847
428.571	9.916	11.655	7.176	12.667	7.66	6.471	6.801	7.008	7.515	7.333	5.113	6.758	15.543	5.749	6.933	5.047	4.623	6.989			428.571	7.238	8.775	7.236	8.647	7.721	5.994	5.622	5.857	6.56	5.747	4.514	5.684	11.057	5.113	10.149	4.253	5.105	6.065
430.476	8.937	11.457	6.92	11.328	7.912	6.229	6.202	6.842	7.039	7.171	4.713	5.668	19.786	4.933	7.027	5.314	4.639	6.737			430.476	7.635	7.513	7.582	8.249	7.985	6.322	5.833	5.776	6.583	6.111	4.726	5.775	11.517	5.563	9.601	4.522	4.846	6.213
432.381	8.653	10.69	7.797	11.616	8.993	6.795	6.259	6.622	6.77	6.692	5.174	5.853	24.306	5.404	6.749	5.48	4.88	6.849			432.381	7.516	7.487	7.236	8.941	7.551	5.764	5.517	5.727	6.514	5.698	4.726	5.547	11.608	5	8.356	4.495	4.426	6.037
434.286	9.053	11.207	8.321	12.404	9.095	6.79	6.638	6.046	7.098	7.145	5.209	6.495	23.353	5.709	6.433	5.596	4.557	6.828			434.286	7.675	8.294	6.654	8.836	6.963	5.609	5.029	6.098	5.989	5.722	4.658	4.905	10.966	4.155	7.375	4.273	4.179	5.722
436.19	8.821	10.405	7.578	11.101	8.531	5.981	6.486	5.992	7.245	7.256	4.913	6.205	18.96	4.964	6.457	5.361	4.317	6.495			436.19	7.659	8.235	6.907	8.182	6.985	5.621	4.938	5.441	5.983	6.327	4.315	4.723	10.415	4.049	7	4.468	4.506	5.532
438.095	8.368	10.19	7.251	11.657	8.442	5.929	7.259	6.525	7.564	6.547	4.635	5.942	17.832	4.722	6.572	5.051	4.47	6.301			438.095	7	7.294	7.231	8.584	7.632	5.414	5.153	5.38	6.503	6.278	4.322	5.2	11.034	4.979	6.87	4.576	4.975	6.556
440	8.474	11.276	7.481	11.692	8.381	6.205	7.025	6.324	7.529	7.462	5.252	6.121	19.486	5.61	6.701	5.087	4.12	6.333			440	7.04	7.118	6.665	8.346	7.61	5.529	5.421	5.62	6.646	5.352	4.486	5.014	11.352	5.275	6.817	4.434	4.895	6.773
441.905	8.621	10.56	7.417	11.025	7.585	6.229	5.943	6.212	7.044	8.026	5.417	6.084	19.867	5.543	6.775	5.458	4.454	6.333			441.905	7.976	8.112	6.846	8.383	6.86	5.5	5.478	5.331	6.309	5.031	4.486	4.996	11.034	5.303	6.745	4.401	4.654	6.611
443.81	8.053	9.664	7.075	11.505	7.558	6.367	7.362	6.355	6.755	7.179	5.043	5.789	22.382	5.121	6.957	5.394	4.945	6.161			443.81	7.889	7.535	6.742	8.584	6.559	5.172	5.163	5.6	6.377	5.346	4.596	4.867	11.108	4.5	6.442	4.337	5.006	6.273
445.714	7.937	9.707	6.449	10.828	7.823	6.329	6.922	6.162	6.27	6.641	4.957	5.874	22.295	5.278	6.909	5.018	4.59	6.199			445.714	7.516	6.984	6.308	8.491	6.757	5.19	4.809	6.208	6.863	5.272	5.089	4.519	10.835	3.789	5.519	4.232	5.204	5.259
447.619	8.621	10.31	6.406	10.96	7.98	6.071	5.514	6.564	6.446	7.863	5.174	10.432	18.584	5.049	6.54	5.368	4.798	6.554			447.619	7.238	8.348	6.604	8.394	7.206	5.172	4.861	6.033	6.531	4.722	5.11	4.856	10.801	4.493	5.731	4.178	4.852	5.745
449.524	8.516	10.672	7.251	11.843	8.585	6.262	7.521	6.764	6.858	8.906	4.983	15.642	18.237	5.336	6.168	5.664	4.678	6.656			449.524	7.31	7.888	7.115	7.952	7.287	4.805	4.799	5.216	5.566	4.488	4.445	5.246	11.108	4.676	5.726	4.222	4.352	6.394
451.429	9.358	11.009	8	11.611	8.245	6.019	8.177	6.402	6.745	8.829	5.339	16.005	18.023	5.879	6.382	5.354	4	6.532			451.429	7.825	7.305	7.434	7.937	6.978	5.23	4.756	5.241	5.954	4.833	4.521	5.007	10.608	4.303	5.202	4.404	4.247	6.269
453.333	9.537	11.517	7.396	11.146	8.605	6.357	6.83	6.278	6.721	8.504	5.617	15.374	17.277	5.605	6.733	5.368	4.448	7.124			453.333	8.04	7.588	7.445	8.599	7.007	5.494	5.072	5.171	6.84	5.185	4.527	4.993	10.795	4.592	5.442	4.29	4.438	6.218
455.238	8.663	10.103	7.166	11.298	8.735	6.638	6.238	6.355	6.995	8	5.4	14.421	17.601	5.215	6.495	5.632	4.798	7.285			455.238	7.54	6.979	7.082	8.989	7.375	5.379	5.359	5.2	6.394	5.611	4.26	5.186	10.591	5.014	6.168	4.239	4.796	6.463
457.143	9.674	9.345	7.332	12	8.544	6.195	6.071	6.255	6.804	7.872	5.643	13.084	18.012	5.484	6.398	5.227	4.317	7.134			457.143	7.151	7.364	7.137	9.156	7.007	5.615	5.579	5.212	6.063	6.117	4.329	4.982	10.506	5	6.192	4.215	4.679	6.694
459.048	9.326	9.741	7.497	12.02	8.503	5.838	5.933	6.429	6.51	7.513	5.548	13.742	17.977	5.426	6.727	5.126	3.907	6.694			459.048	7.262	7.738	6.566	8.48	6.831	5.31	5.785	5.069	6.451	7.191	4.822	4.846	11	5.162	5.668	4.074	4.444	6.227
460.952	8.411	9.931	7.337	11.712	7.633	5.519	5.603	6.363	6.672	6.564	5.035	12.853	17.202	4.928	6.259	5.177	4.18	6.091			460.952	7.31	7.203	6.324	7.721	7.426	5.172	5.445	5.176	6.423	6.728	5.808	4.698	11.278	5.099	6.024	4.051	4.71	5.954
462.857	8.526	9.5	6.701	11.414	7.204	6.005	6.021	6.328	7.078	6.188	4.73	10.895	18.405	4.852	6.267	5.249	4.568	6.43			462.857	6.921	7.791	6.995	8.216	7.449	5.379	5.014	5.167	6.149	5.722	6.418	4.832	11.722	4.937	6.409	4.276	4.883	6.046
464.762	8.842	9.957	6.743	11.02	7.415	6.971	6.337	6.394	7.083	7.171	4.991	11.763	18.572	4.852	6.66	5.144	4.366	6.806			464.762	6.683	8.048	7.027	8.361	6.897	5.511	4.842	5.241	5.931	5.815	5.055	4.895	10.898	4.62	6.111	4.343	4.765	5.815
466.667	9.379	10.06	7.481	11.591	7.313	6.648	5.954	6.355	7.338	7.872	5.035	12.511	16.555	5.166	6.198	4.617	4.519	6.559			466.667	7.317	8.904	6.835	8.572	6.787	5.943	5.062	5.367	6.24	5.79	4.493	5.158	10.5	4.521	5.981	4.478	5.049	5.782
468.571	9.147	9.379	7.358	11.934	7.245	5.981	5.369	6.734	7.593	7.325	4.53	11.258	16.884	5.489	6.225	4.588	4.705	6.306			468.571	7.421	9.471	6.632	8.706	7.382	5.759	5.172	5.347	6.72	5.79	4.74	5.165	11.17	4.958	6.019	4.667	5.265	5.588
470.476	8.505	9.345	6.551	11.384	7.741	5.562	5.33	6.344	7.118	7.427	4.565	11.274	19.671	5.085	6.342	4.495	4.601	6.167			470.476	7.532	8.401	6.692	8.55	7.353	5.253	4.656	5.82	7.103	5.735	4.534	4.856	11.364	5.296	6.639	4.478	4.833	5.898
472.381	8.242	9.75	6.77	10.717	8.211	5.99	6.025	6.347	7.289	7.983	5	12.768	19.85	5.179	6.559	4.744	4.65	7.043			472.381	7.683	7.85	6.379	9.138	7.779	5.144	4.947	6.204	6.691	6.198	4.959	5.333	12.091	4.937	6.774	4.485	4.679	6.532
474.286	8.232	10.129	6.893	10.848	8.565	6.681	6.66	6.869	7.471	7.598	5.287	11.353	16.746	5.749	6.695	5.354	4.672	7.688			474.286	7.294	7.791	6.637	9.338	7.846	5.299	5.23	5.51	6.234	5.586	5.253	5.214	12.631	4.69	5.909	4.394	4.66	6.019
476.19	8.758	9.991	6.904	11.465	9.088	6.362	6.199	6.444	7.873	7.641	5.8	9.837	14.717	5.3	6.578	5.516	4.47	6.812			476.19	7	8.551	6.709	8.639	7.257	5.448	4.986	5.478	6.731	4.586	5.11	4.737	11.284	4.852	5.899	4.556	4.71	5.458
478.095	9.379	11.655	7.963	11.758	8.537	6.919	6.415	6.676	7.623	7.915	5.835	11.584	15.116	4.78	6.586	5.426	4.454	6.769			478.095	7.468	9.086	6.478	8.725	7.221	5.477	5.455	6.233	6.851	5.543	5.021	5.404	11.222	4.796	6.62	4.599	4.907	6.056
480	9.8	12.948	7.866	11.5	7.626	7.233	6.479	6.826	7	8.368	5.365	13.084	17.272	4.924	6.398	5.292	4.525	7.231			480	7.825	8.743	7.165	8.751	7.221	5.609	5.612	5.873	6.377	6.062	5.521	5.312	11.909	4.718	6.471	4.684	4.586	5.968
481.905	9.168	12.526	7.738	11.005	7.755	6.705	5.926	6.819	7.069	8.35	5.174	13.689	17.133	5.135	7.217	5.303	4.874	7.333			481.905	7.675	8.433	7.126	8.349	7.279	5.42	5.555	5.714	6.086	6.025	5.253	4.846	11.045	4.662	6.346	4.737	4.401	5.829
483.81	9.095	12.06	10.075	11.49	7.81	6.724	5.635	7.228	7.191	7.906	4.948	12.905	15.844	5.489	7.414	5.094	5.246	7.548			483.81	7.437	8.791	7.203	8.513	6.794	5.236	5.402	5.473	6.366	6.222	4.815	4.986	10.591	5.19	6.303	4.303	4.185	6.259
485.714	9.6	11.466	10.075	12.121	8.082	6.752	5.922	7.139	7.397	8.077	4.991	14.653	14.717	5.991	6.674	5.26	5.005	7.36			485.714	7.222	8.684	7.286	8.602	6.566	5.902	4.99	5.278	6.371	6.29	4.767	5.028	11.205	5.697	5.875	4.199	4.198	5.977
487.619	9.095	11.19	7.904	11.934	8.041	6.533	6.007	6.49	7.706	7.222	5	15.026	12.624	5.798	6.693	5.282	4.437	6.866			487.619	7.286	8.465	7.808	8.576	6.956	6.098	4.737	5.82	6.114	7.191	4.185	5.154	11.398	5.183	6.01	4.29	4.698	5.875
489.524	9.411	12.181	7.61	11.889	7.816	6.533	5.833	6.687	7.897	7.094	5.252	12.247	13.179	5.399	6.693	5.368	4.541	7.145			489.524	7.492	8.674	8.236	8.866	7.36	5.454	4.751	5.355	6.274	7.179	3.911	4.698	10.705	4.106	5.971	4.226	4.586	5.495
491.429	10.221	11.595	7.738	11.525	8.068	6.329	6.337	7.054	7.461	7.564	5.13	11.916	14.376	5.318	6.618	5.545	4.989	7.194			491.429	7.151	8.733	7.566	9.086	7.493	5.374	5	5.371	6.52	5.79	4.253	4.67	10.364	4.232	6.24	3.993	4.407	5.625
493.333	11.189	9.819	7.62	11.53	7.823	6.267	6.301	6.853	7.706	7.803	5.026	11.753	15.179	5.592	6.5	5.04	5.262	6.624			493.333	6.944	8.299	7.341	8.736	7.088	5.195	5.067	5.739	6.371	5.481	4.527	4.849	10.744	4.528	6.394	4.182	4.426	5.829
495.238	9.789	11.017	9.385	12.263	8.333	6.981	6.39	6.015	7.608	8.068	5.478	10.358	14.514	5.605	6.414	4.794	5.066	6.134			495.238	7.31	8.401	7.291	8.494	6.603	5.356	4.995	5.102	6.149	5.654	4.911	4.765	11.528	4.408	5.74	4.397	4.475	6.282
497.143	8.558	11.802	9.663	12.136	9.163	6.876	6.511	5.822	7.294	7.41	5.226	8.547	18.827	5.448	6.869	5.375	4.612	6.344			497.143	7.54	9.909	7.385	8.569	6.5	5.759	5.086	5.016	6.223	5.531	4.87	5.035	11.21	4.648	5.625	4.283	4.796	6.282
499.048	10.274	10.552	8.118	11.662	8.551	6.562	6.074	6.436	7.387	7.205	5.209	9.526	19.358	5.839	7.037	5.426	4.503	6.392			499.048	6.944	9.455	7.423	8.405	6.596	5.563	5.062	5.465	6.057	5.426	4.562	5.232	10.619	4.979	6.207	4.212	4.611	5.782
500.952	9.726	11.095	7.679	11.323	7.912	6.448	5.691	6.417	7.387	7.735	4.852	9.816	15.237	5.803	6.289	4.859	4.191	6.527			500.952	6.77	9.524	7.137	8.413	6.441	5.408	4.861	5.678	5.96	5.414	4.295	5.337	10.727	5.077	6.038	4.168	4.42	5.718
502.857	8.453	11.25	7.727	11.278	7.456	6	5.894	6.541	7.613	7.744	5.243	8.284	15.243	5.309	6.075	4.856	4.563	6.672			502.857	6.96	10.674	7.286	8.651	6.949	5.54	4.866	5.673	6.086	5.346	4.473	5.06	10.881	5.085	6.447	4.434	4.698	5.519
504.762	8.453	10.5	8	11.354	7.156	5.714	6.131	6.409	7.412	7.718	5.252	7.853	13.584	5.143	6.275	5.022	4.497	6.634			504.762	6.579	10.294	7.066	8.513	7.272	6.029	5.459	5.678	6.429	5.914	5.158	4.86	10.915	5.254	6.981	4.697	4.994	5.931
506.667	8.895	10.103	7.519	11.253	7.401	6.362	5.784	6.216	7.402	8.53	4.93	7.642	12.809	5.386	6.348	5.076	4.24	6.656			506.667	7.214	10.316	7.055	8.301	7.941	6.161	5.488	5.714	6.234	6.185	5.192	5.021	11.256	5.134	6.688	4.707	5.42	5.87
508.571	9.2	9.802	7.064	11.576	8.048	6.79	5.957	6.054	7.475	8.752	5.287	7.5	13.462	5.305	6.318	5.126	4.399	6.344			508.571	7.413	9.995	7.176	8.781	8.022	5.586	5.416	5.649	5.977	5.469	4.836	4.856	11.449	5.211	6.721	4.384	4.907	5.134
510.476	9.042	9.664	7.497	11.641	8.204	5.962	6.092	6.046	7.157	7.915	5.191	6.937	15.168	5.372	6.794	4.834	4.246	6.527			510.476	6.968	10.23	6.648	8.848	7.294	5.529	5.507	5.967	6.063	5.093	4.185	5.011	10.699	5.021	6.505	3.929	4.87	5.412
512.381	9.032	9.871	8.326	11.061	7.429	5.71	5.855	6.776	7.319	7.487	5.67	6.474	17.353	5.565	6.749	4.758	4.596	6.828			512.381	7.032	9.551	7.198	8.546	7.338	5.799	5.378	5.739	6.446	5.16	4.048	5.246	11.25	4.775	6.423	4.104	4.747	6.032
514.286	8.768	10.879	8.294	11.051	7.667	6.21	5.635	6.66	7.265	7.171	5.504	6.342	15.896	5.466	6.404	5.116	4.956	6.586			514.286	7.23	8.888	7.357	8.595	7.125	5.494	5.923	5.686	6.634	6.136	4.199	5.632	11.636	5.289	6.726	4.603	4.735	6.125
516.19	9.011	11.716	7.866	11.424	7.925	6.248	5.404	6.081	6.583	6.496	5.148	6.311	13.746	5.839	6.508	5.455	4.792	6.823			516.19	7.175	15.102	6.868	8.71	7.39	5.379	6.234	6.151	6.56	6.265	4.048	5.751	11.125	5.211	6.885	4.865	5.154	6.13
518.095	9.958	11.914	7.251	11.551	7.531	6.076	5.504	5.954	6.436	6.889	5.035	6.937	13.607	6.018	6.802	5.318	4.426	6.887			518.095	7.452	16.979	6.885	8.755	7.088	5.793	5.679	5.747	6.429	5.346	4.527	5.368	11.148	5.092	6.625	4.886	4.747	5.731
520	9.895	11.198	7.278	11.207	8.17	6.043	5.908	6.093	6.637	7.41	4.696	6.737	14.197	5.686	6.976	5.054	4.492	6.543			520	8.151	12.813	7.868	9.223	6.978	5.747	5.029	5.531	6.429	5.778	5.267	5.175	11.716	5.465	6.428	4.798	5.136	5.458
521.905	8.526	9.914	7.684	10.768	8.34	5.89	5.968	6.039	6.564	7.205	4.687	6.174	13.543	5.233	6.372	4.664	4.568	6.027			521.905	7.992	11.332	8.22	8.855	7.493	6.109	5.746	5.604	6.469	6.148	5.205	5.568	11.688	5.246	6.558	4.761	5.185	5.806
523.81	7.989	9.836	7.882	11.298	8.007	6.314	6.078	6.409	7.216	7.393	5.304	6.495	12.925	5.108	6.495	4.975	4.907	6.102			523.81	7.111	9.947	7.555	8.572	7.103	5.937	6.148	6.065	6.646	5.827	5.014	5.66	11.443	5.021	6.466	4.751	4.815	6.134
525.714	8.537	10.586	8.064	11.753	8.184	6.457	6.333	6.849	7.451	7.863	5.87	6.821	13.549	5.179	6.647	5.401	4.809	6.522			525.714	7.087	10.433	7.681	9.294	7.316	5.701	5.603	6.269	6.577	5.981	5.041	5.119	11.585	5.085	6.346	5.162	5.099	5.843
527.619	8.811	10.552	7.989	11.596	8.129	6.633	6.195	6.683	6.814	7.265	5.252	6.374	12.064	5.309	6.583	5.238	4.399	5.952			527.619	8.032	9.973	7.841	9.673	7.61	6.103	5.459	6.02	6.56	6.846	5.301	5.277	11.415	5.197	6.577	5.414	5.284	5.824
529.524	8.705	10.664	7.829	11.545	8.027	6.714	6.23	6.564	6.931	6.607	4.87	5.984	11.676	5.345	6.634	5.545	4.432	5.71			529.524	8.992	8.759	7.89	9.595	7.265	6.466	5.522	6.331	7.04	7.543	5.212	5.46	10.915	5.254	7.144	5.387	5.006	5.81
531.429	8.705	10.56	7.824	11.056	8.578	6.214	6.252	6.459	7.211	6.598	4.965	5.811	11.85	5.26	6.62	5.238	4.393	6.22			531.429	8.722	8.877	7.319	8.944	7.456	6.994	5.876	5.984	7.211	7.475	4.658	5.446	10.25	5.275	6.808	5.128	4.864	6.25
533.333	9.832	10.543	7.957	10.965	8.272	6.324	6.113	6.568	7.25	6.274	5.07	6.258	12.393	5.892	6.468	5.141	5.131	6.871			533.333	7.508	8.455	6.868	8.309	7.294	6.287	5.775	5.322	6.64	6.586	4.815	5.519	11.159	5.352	6.245	4.838	5	6.644
535.238	9.821	11.647	7.46	10.848	7.667	6.319	5.911	6.78	6.951	5.855	4.661	6.716	12.728	6.004	6.102	5.264	5.186	6.823			535.238	7.46	8.016	7.324	8.428	7.382	5.695	5.612	5.437	6.446	6.562	5.089	5.765	12.244	5.627	6.861	5.172	5.123	6.593
537.143	8.179	10.56	7.102	10.773	7.844	6.252	6.05	6.541	6.328	5.983	4.287	5.947	11.457	5.229	5.77	4.625	4.246	6.495			537.143	7.476	7.984	7.736	8.654	8.096	5.902	5.603	5.412	6.737	7.012	5.089	5.856	11.648	5.711	6.841	5.067	4.951	6.644
539.048	8.632	9.81	7.353	10.955	7.306	6.119	6.021	5.981	6.176	6.598	4.391	5.568	10.809	5.031	5.473	4.711	3.891	6.226			539.048	6.921	7.898	7.846	8.721	8.353	5.506	5.349	5.433	6.6	6.253	4.877	5.382	11.114	5.127	6.38	4.498	4.79	6.056
540.952	9.326	10.922	7.604	10.965	6.646	6.143	5.66	5.985	6.863	6.462	4.4	5.416	11.231	4.933	5.741	4.924	3.792	6.048			540.952	7.492	8.947	7.522	9.476	7.963	5.466	5.833	5.404	6.743	5.827	4.966	5.126	11.659	5.225	6.413	4.364	4.58	5.574
542.857	9.074	10.362	7.46	10.571	7.259	6.448	5.84	6.224	6.966	6.051	4.73	5.384	12.786	4.942	6.465	4.989	4.109	6.226			542.857	7.889	8.674	7.489	9.331	7.191	5.782	5.876	5.69	6.903	5.926	4.692	5.505	11.375	5.641	6.755	4.71	4.691	5.88
544.762	8.337	9.81	7.599	11.247	7.707	5.957	5.738	6.135	7.005	6.197	4.757	5.626	13.48	4.861	6.409	5.04	4.262	6.269			544.762	7.675	7.834	7.643	8.796	6.86	5.609	5.234	5.865	7.217	6.105	4.253	5.804	11.034	5.415	7.115	4.774	5.037	6.569
546.667	8.2	10.578	7.914	12.212	7.299	5.738	5.681	6.073	7.108	6.231	4.565	6.068	11.977	4.821	6.134	4.329	4.322	6.548			546.667	7.603	8.267	7.346	9.461	7.199	5.264	5.22	5.853	7.046	6.204	4.582	5.116	11.426	5.148	6.615	4.704	5.012	6.315
548.571	8.2	10.897	7.717	11.576	6.85	5.738	5.961	6.471	7.382	6.444	4.635	6.605	11.116	5.121	6.265	4.625	4.41	6.57			548.571	8.357	7.711	7.709	9.554	7.559	5.483	5.545	6.155	6.789	5.932	5.11	5.095	11.909	5.556	6.577	4.923	5.093	5.875
550.476	7.989	10.629	7.727	11.606	6.449	5.271	5.369	6.347	7.559	6.427	4.687	6.416	11.416	5.341	6.04	5.383	4.066	6.081			550.476	8.278	7.626	8.137	8.822	7.699	6.161	5.493	5.988	7.257	5.914	5.274	5.204	11.665	5.261	6.904	4.741	4.92	5.977
552.381	7.589	9.948	7.674	11.278	6.789	5.624	5.365	5.919	6.966	5.966	4.904	6.363	11.376	4.879	5.773	4.769	3.869	5.769			552.381	7.413	9.257	8.016	8.892	7.949	6.546	5.373	5.984	7.749	5.66	4.952	4.884	10.955	4.838	7.173	4.667	4.556	5.968
554.286	8.368	9.81	7.433	10.53	7.51	5.814	5.66	6	6.564	5.667	4.591	6.305	11.295	4.74	5.714	4.603	3.995	6.108			554.286	7.992	9.556	7.824	9.405	8.132	6.144	4.962	6.065	8.36	5.568	4.76	5.196	11.426	5.401	6.962	4.63	4.821	6.343
556.19	8.326	9.853	7.476	11.136	7.639	5.362	5.135	5.707	6.284	5.991	4.4	6.289	11.983	5.251	6.187	4.96	3.639	5.93			556.19	7.722	9.251	7.72	9.483	7.941	5.339	5.01	6.384	9.834	6.142	4.692	5.435	11.5	5.852	6.697	4.481	5.272	6.472
558.095	6.747	9.414	7.69	11.53	7.633	5.343	5.145	5.622	6.387	5.966	4.617	5.584	11.416	4.892	6.332	4.892	3.71	5.532			558.095	7.056	9.401	7.615	8.941	7.603	5.856	5.263	6.535	11.011	6.074	4.966	5.481	11.83	5.592	6.851	4.737	5.426	6.005
560	7.168	9.664	7.749	11.894	7.789	5.471	5.23	6.069	6.593	5.949	4.887	5.305	10.821	4.798	6.115	4.798	4.18	5.93			560	7.595	9.54	7.341	8.48	7.559	6.414	5.096	5.735	11.457	5.401	5.007	5.586	12.557	5.056	6.875	4.778	5.309	5.931
561.905	8.221	10.698	7.759	11.414	7.762	6	5.202	6.255	6.892	6.393	4.8	5.411	11.491	4.892	6.302	4.354	4.066	6.242			561.905	6.968	9.016	6.956	8.472	7.507	5.701	5.407	5.376	11.229	5.296	5.089	5.733	12.46	4.866	6.832	4.613	4.802	6.278
563.81	8.4	10.81	12.46	11.253	7.653	6.067	6.202	6.185	6.858	7.214	4.496	5.4	11.607	4.762	5.992	4.365	4.355	6.296			563.81	6.627	8.439	7.055	8.825	7.897	6.006	5.67	5.735	10.24	5.704	4.808	5.86	12.011	4.704	6.692	4.764	4.58	6.042
565.714	8.863	9.603	12.433	11.258	7.354	5.733	6.426	6.228	6.608	7.915	4.339	5.926	11.676	5.157	6.128	4.516	4.557	6.086			565.714	7.476	8.176	7.203	8.628	7.794	6.31	6.038	5.922	9.137	5.821	4.973	5.923	11.028	4.901	6.736	5.158	4.753	6.134
567.619	9.347	9.491	7.492	10.97	7.517	5.59	5.716	6.069	6.794	7.615	4.47	5.7	12.254	5.291	5.813	4.516	4.104	5.339			567.619	7.722	8.947	7.423	8.468	7.397	5.626	5.995	6.118	7.903	5.79	4.904	5.975	10.165	5.254	6.438	5.36	5.241	6.731
569.524	9.284	9.793	7.235	11.258	8.041	5.571	5.394	5.981	6.662	7.368	4.226	5.595	11.925	4.978	5.393	4.245	4.06	5.231			569.524	7.929	9.626	7.775	9.156	7.824	5.845	5.388	6.024	7.36	5.673	3.952	5.74	10.653	5.43	6.25	4.721	5.451	6.222
571.429	9.032	9.879	7.818	11.101	7.871	5.495	5.372	6.1	6.672	7.171	4.252	5.916	11.873	4.91	5.917	4.596	4.273	6.129			571.429	7.651	7.861	7.407	8.762	7.103	5.672	4.971	5.596	7.571	5.488	3.637	5.274	10.534	4.887	6.312	4.165	4.673	5.708
573.333	9.158	9.897	7.85	10.818	8.054	5.557	5.44	5.919	7.059	7.667	4.8	5.937	12.711	4.973	5.834	5.188	4.257	6.134			573.333	7.595	7.733	6.791	8.375	6.309	5.057	5.115	5.445	7.726	5.66	3.87	5.116	10.062	4.338	5.904	4.434	4.537	5.606
575.238	8.316	9.612	7.439	11.101	7.966	5.91	5.348	6.042	7.24	7.778	5.296	5.142	12.179	4.717	5.746	5.105	4.503	6.156			575.238	6.921	8.508	6.434	8.424	6.809	5.178	5.316	5.816	7.194	5.79	4.068	5.084	10.494	4.711	6.433	4.626	5.043	5.829
577.143	7.642	9.5	7.636	11.53	7.673	6.29	5.34	6.502	6.971	6.863	5.783	4.995	12.087	4.565	6.086	4.949	4.978	6.333			577.143	6.968	8.888	6.962	8.77	6.699	5.414	5.153	6.094	6.794	5.519	4.295	5.267	10.841	5	7.029	4.33	4.926	5.884
579.048	7.863	9.81	7.61	11.737	8.007	6.448	5.124	6.147	6.824	6.803	4.739	5.611	12.283	4.637	6.243	4.975	4.727	5.882			579.048	7.794	9.118	7.604	9.926	6.721	5.661	5.249	6	6.754	5.364	4.63	5.116	10.341	4.937	6.567	4.498	4.944	5.542
580.952	7.842	10.414	7.733	11.667	8.048	5.667	5.248	5.741	7.191	6.547	4.078	5.558	11.416	4.839	6.345	5.094	4.372	5.747			580.952	7.532	8.214	7.077	9.301	7.044	5.695	5.124	5.661	6.594	6.154	4.5	5.06	10.074	5.232	6.389	4.939	5.105	5.356
582.857	8.389	10.897	7.775	11.318	7.878	5.895	5.706	6.247	7.564	6.282	4.461	5.363	12.139	4.839	6.858	4.993	4.055	6.511			582.857	7.524	8.096	7.055	8.517	7.235	5.684	5.053	5.318	6.646	7.093	4.158	5.523	10.335	5.486	6.567	4.684	4.827	5.542
584.762	7.495	10.629	7.594	10.904	8.082	5.924	5.713	6.363	7.152	6.915	4.53	5.442	12.202	5.265	6.561	4.913	3.962	6.651			584.762	7.429	8.198	7.341	8.699	7.191	5.891	5.081	5.506	6.491	6.914	4.247	5.87	10.062	5.451	6.337	4.202	4.506	5.708
586.667	7.011	10.457	7.358	10.631	8.136	5.443	5.096	6	6.348	6.897	4.557	5.505	11.075	5.592	5.906	4.733	4.18	6.059			586.667	7.246	7.545	7.533	8.55	6.846	5.299	5.182	6.306	6.343	6.086	4.623	5.621	9.199	5.345	6.553	4.576	4.79	5.88
588.571	7.716	10.836	7.15	10.934	7.02	5.543	5.145	6.162	6.123	5.94	4.617	5.568	11.364	5.121	6.035	4.545	4.361	5.823			588.571	7.175	8.091	7.368	8.201	7.507	5.121	5.512	6.314	6.446	5.302	4.384	5.119	8.682	4.972	6.74	4.936	4.827	5.769
590.476	7.611	10.043	7.326	10.833	6.871	5.876	5.681	6.039	6.324	6.239	4.704	5.8	12.098	5.435	6.078	4.329	4.475	5.973			590.476	7.325	7.898	7.467	8.416	7.471	5.494	5.144	5.38	6.331	5.543	4.178	5.428	8.426	4.838	6.438	4.822	4.759	5.662
592.381	7.074	9.81	7.294	10.894	7.02	6.019	5.649	5.907	6.912	6.957	4.73	6.047	12.035	5.538	5.968	4.177	4.47	6.108			592.381	7.556	7.631	7.231	8.524	6.772	5.236	5.225	5.486	6.834	6.167	3.979	5.863	8.278	5.423	7.005	4.993	5.093	5.884
594.286	7.8	10.086	7.497	11.227	6.98	5.681	5.571	6.089	7.02	6.41	4.583	5.816	12.029	5.031	6.064	4.419	4.251	5.108			594.286	6.73	8.385	6.758	8.056	7.507	5.172	5.502	5.657	6.903	5.599	3.966	5.761	8.381	5.479	6.327	4.933	4.914	6.264
596.19	8.547	9.103	7.754	10.737	6.98	5.995	5.617	6.124	6.495	6.444	4.835	5.984	11.983	5.399	6.19	4.755	4.164	5.183			596.19	6.698	8.401	7.22	8.405	7.89	5.414	5.359	5.645	6.263	5.642	4.425	5.491	7.943	4.873	5.375	4.37	4.636	6.083
598.095	8.568	8.276	7.979	10.677	7.327	6.224	5.688	6.066	6.603	6.35	4.783	6.342	11.543	5.547	6.083	4.628	4.251	6.048			598.095	6.722	8.123	7.28	8.539	8.309	5.253	5.297	5.898	6.097	6.167	4.192	5.105	7.545	4.965	6.418	4.407	4.5	5.565
600	7.789	8.526	8.61	10.616	7.667	6.252	5.965	5.996	6.745	6.205	4.643	6.237	10.861	5.063	5.989	5.094	4.388	6.242			600	6.643	7.588	7.154	8.312	7.757	5.069	5.167	5.959	6.131	5.34	3.808	4.291	7.744	4.894	6.846	4.492	4.401	5.431
601.905	7.326	8.621	8.529	10.121	6.605	6.133	5.773	6.039	6.672	6.35	4.704	5.711	10.549	5.085	5.821	5.484	4.273	5.763			601.905	7.103	7.38	7.11	8.457	6.426	4.839	5.44	5.641	6.246	5.019	3.849	4.709	7.841	4.782	6.413	4.822	5.019	5.657
603.81	8.074	8.353	8.353	10.727	6.592	5.79	5.39	5.88	6.436	5.932	4.426	5.637	11.289	5.475	5.698	4.949	3.967	5.941			603.81	7.333	7.845	6.857	8.387	6.507	5.483	5.593	5.743	6.469	5.34	4.349	5.561	7.71	5.028	6.264	5.458	5.488	6.301
605.714	8.116	9.06	8.385	11.54	6.741	5.952	5.578	5.795	6.397	6.761	4.426	6.132	11.509	5.148	5.826	4.733	3.787	6.038			605.714	7.317	8.198	7.286	8.424	6.441	5.862	5.603	5.812	6.463	5.506	4.411	5.495	8.097	4.972	6.115	5.209	5.148	6.833
607.619	7.684	8.603	7.888	11.071	6.925	5.733	5.443	5.548	6.402	7.547	4.461	5.726	11.416	4.471	5.856	5.054	3.842	5.839			607.619	6.817	7.567	7.61	8.792	6.912	5.672	6.775	5.604	6.72	5.506	4.479	5.688	8.131	5.254	6.452	4.593	4.914	6.25
609.524	8.189	8.19	7.615	10.505	7.544	5.652	5.273	5.247	6.27	6.709	4.191	5	11.012	4.444	5.981	4.852	3.869	5.812			609.524	7.183	8.107	7.44	8.959	7.5	5.776	7.23	5.645	7.126	5.302	4.637	5.488	7.625	4.803	6.639	4.569	5.099	5.685
611.429	8.074	8.129	8.086	10.106	7.565	5.919	5.365	6.004	6.324	6.709	4.313	5.689	11.075	4.888	6.136	4.433	3.978	5.328			611.429	6.905	8.872	7.632	9.286	7.147	5.368	6.167	5.49	6.52	5.426	4.404	5.323	7.784	4.711	6.332	4.401	5.08	6.245
613.333	7.821	8.931	7.952	10.232	8.435	6.129	5.546	6.104	6.275	7.043	4.687	6.237	12.087	5.269	5.858	4.523	3.88	5.027			613.333	7.016	8.257	7.687	9.108	7.551	5.483	5.612	5.669	6.046	5.63	4.562	5.291	8.028	5.38	6.505	4.586	4.747	6.213
615.238	7.579	10.017	7.428	11.101	9.98	5.962	5.535	5.931	6.108	7.043	4.548	5.9	11.723	5.265	6.225	4.462	3.776	5.462			615.238	7.73	8.241	7.61	8.517	7.86	5.937	5.732	5.861	6.754	6.241	4.479	5.312	8.597	5.275	7.067	4.997	4.858	5.741
617.143	7.484	9.595	7.214	11.409	10.197	5.519	5.323	6.015	6.578	7.436	4.574	5.705	10.301	5.085	6.636	4.487	3.842	6.204			617.143	7.413	7.914	6.912	8.361	7.25	5.494	5.871	5.931	7.337	6.358	4.116	5.386	8.574	4.789	7.394	4.572	4.87	5.773
619.048	8.505	8.534	6.957	10.46	9.755	6.081	5.418	5.39	6.627	7.179	4.635	5.463	10.162	5.063	6.139	4.329	3.738	5.758			619.048	7.175	7.139	6.901	8.554	7.257	5.42	5.78	6.029	7.189	6.988	3.76	5	8.057	4.817	7.163	4.495	4.759	5.759
620.952	8.642	8.138	7.364	10.591	9.544	6.452	5.191	4.965	6.304	6.333	4.4	5.253	11.064	5.049	5.567	3.975	3.743	5.511			620.952	6.897	7.738	7.159	8.58	7.522	5.494	5.569	5.878	6.52	7.358	4.144	5.302	7.795	5.345	6.63	4.421	4.772	5.542
622.857	7.863	8.819	7.684	10.833	9.327	5.843	4.773	5.676	6.265	6.111	4.887	5.289	10.931	4.848	5.727	4.025	3.705	5.839			622.857	6.659	7.674	6.429	8.257	7.581	5.195	5.282	5.731	6.743	7.111	4.438	5.607	7.727	5.014	6.418	4.576	4.963	5.866
624.762	8.053	8.612	7.278	9.894	9.299	5.157	4.766	5.884	6.392	7.291	4.713	5.658	10.341	5.054	5.92	4.31	3.475	5.78			624.762	6.968	7.219	6.423	8.257	7.375	5.609	6.244	5.543	6.869	6.784	4.096	5.07	7.693	4.641	7.505	4.899	5.241	5.648
626.667	8.042	8.724	6.888	10.404	9.354	5.343	4.986	5.243	6.211	7.778	4.2	5.458	10.688	4.933	5.481	4.43	3.574	5.344			626.667	7.19	7.893	7.181	9.059	7.375	6.132	6.459	5.71	7.309	6.469	4.774	4.891	7.648	4.725	7.192	4.461	5.506	5.435
628.571	7.589	9.638	7.273	11.081	9.714	5.686	5.248	5.618	5.873	7.085	4.513	5.368	10.428	4.619	5.733	4.466	4.055	5.167			628.571	7.5	8.155	7.857	9.717	8.228	6.006	5.775	5.588	8	7.031	5.137	5.512	8.108	4.873	6.106	4.886	5	6.181
630.476	8.421	9.655	7.658	10.864	10.068	5.914	5.525	6.066	6.123	6.325	4.73	5.611	11.306	5.161	5.947	4.993	4.153	5.656			630.476	7.484	7.615	7.841	9.197	7.816	5.989	5.632	5.29	7.537	7.031	4.966	5.607	8.409	5.437	5.981	5.128	4.58	5.935
632.381	8.874	9.336	7.273	11.071	11.075	5.767	5.199	5.633	6.559	5.829	4.565	5.658	11.861	5.327	5.789	4.726	4.158	6.183			632.381	6.778	7.508	7.28	8.416	6.64	6.155	5.211	5.518	6.88	5.957	4.733	5.505	12.733	5.676	6.264	4.731	5.302	5.907
634.286	8.084	8.776	6.775	11.308	11.728	5.386	4.801	5.154	6.642	6	5.148	5.637	10.902	4.803	5.65	4.249	3.962	5.887			634.286	5.937	7.952	6.995	7.985	7.463	5.856	5.014	5.763	6.411	5.506	4.267	5.214	13.852	5.289	6.837	4.667	5.333	5.875
636.19	7.621	8.75	7.053	10.717	10.449	5.262	4.979	5.135	6.485	6.034	5.009	5.663	10.78	4.247	5.503	4.621	3.76	5.392			636.19	6.262	7.872	7.022	8.097	7.772	5.661	5.177	5.461	6.857	5.506	4.438	4.677	9.716	4.592	6.721	4.677	4.969	5.412
638.095	8.074	9.371	8.775	10.722	10.17	5.314	5.418	5.475	6.495	5.47	4.513	6.179	10.763	4.323	5.626	4.924	4.415	5.478			638.095	6.905	8.348	7.44	8.673	7.625	6.098	5.636	5.416	6.731	5.296	4.349	5.211	7.733	4.676	6.452	4.7	4.667	5.704
640	8.253	8.716	8.043	10.652	10.782	5.381	5.309	5.367	5.931	5.504	4.452	5.611	10.734	4.395	5.505	4.968	3.831	5.247			640	7.341	8.604	7.841	9.052	7.316	6.471	5.507	5.678	7.189	5.29	4.445	5.677	7.614	5.507	6.5	4.653	4.383	6.106
641.905	7.695	10.06	6.449	10.601	10.905	5.619	5.255	5.436	5.647	5.709	4.417	4.984	11.283	4.022	5.602	4.751	3.454	5			641.905	6.69	8.433	7.846	8.959	6.691	6.115	5.067	5.339	7.091	4.864	4.37	5.161	7.955	4.852	6.274	4.798	4.537	5.977
643.81	7.095	11.284	6.706	10.773	10.952	5.743	5.457	5.544	5.76	5.359	4.217	5.268	11.688	4.35	5.636	4.65	4.044	5.441			643.81	6.341	8.262	7.769	7.985	6.5	5.385	4.56	5.396	6.029	5.407	4.13	4.733	7.761	4.472	6.37	4.525	4.642	5.995
645.714	7.768	10.991	6.631	10.187	11.204	5.643	5.287	5.656	5.828	5.573	4.461	5.626	11.087	4.655	5.663	4.484	3.738	5.586			645.714	7.254	7.225	7.61	7.561	7.051	5.241	4.632	5.253	6.291	5.833	4.164	4.775	7.903	4.972	6.298	4.192	4.809	6.324
647.619	8.221	9.879	6.578	9.576	10.912	5.514	5.277	5.463	6.005	5.752	4.696	5.447	10.682	4.525	5.947	4.433	3.448	5.72			647.619	7.048	7.556	7.692	8.494	7.926	5.529	5.206	5.065	6.634	5.673	3.521	5.161	7.392	5.268	6.125	4.667	4.827	6.144
649.524	7.632	9.474	8.326	10.182	9.442	5.248	5.138	5.019	5.417	5.769	4.07	4.705	10.85	4.475	5.727	4.289	3.404	5.532			649.524	6.413	8.578	8.209	8.48	7.581	5.529	5.703	5.404	7.097	5.599	3.849	5.744	7.568	5.282	6.697	4.859	4.704	5.977
651.429	7.116	9.017	9.658	10.717	8.735	5.224	5.117	5.286	5.225	5.932	3.861	4.874	10.624	4.489	5.671	4.361	3.563	5.22			651.429	6.643	9.31	7.775	8.268	7.662	5.569	5.593	5.571	7.051	5.346	4.555	5.53	8.312	5.085	7.159	4.761	5.025	5.569
653.333	6.937	8.655	8.374	10.313	8.728	5.257	5.035	5.475	5.461	5.718	4.157	5.442	10.416	5.076	5.684	4.368	3.59	5.699			653.333	6.651	8.561	7.099	8.572	7.86	5.793	5.263	5.592	6.326	5.568	4.11	4.926	8.182	4.901	6.861	4.737	4.895	5.167
655.238	8.147	9.784	7.583	10.818	8.374	6.01	5.004	5.243	5.917	5.855	4.452	5.674	10.486	5.135	5.735	3.877	3.219	6.333			655.238	6.127	8.059	7.027	8.361	7.787	6.138	5.014	5.808	5.817	5.784	4.267	4.877	7.818	4.923	6.087	4.576	4.599	5.111
657.143	8.316	9.612	7.139	10.662	7.762	6.105	5.234	4.961	5.887	5.889	4.452	5.484	10.665	4.525	5.914	4.191	3.393	5.898			657.143	6.913	8.267	7.418	8.717	7.669	5.799	4.947	5.906	6.309	5.414	4.452	5.168	6.869	5.049	5.971	4.805	4.938	5.014
659.048	8.189	9.931	7.219	10.101	7.49	5.448	5.525	5.579	6.157	6.197	4.452	5.089	10.803	4.52	5.901	4.422	3.874	5.613			659.048	7.54	8.567	7.692	8.814	7.309	5.534	5	5.935	7.017	5.907	4.685	5.646	7.074	5.169	5.923	5.189	5.179	5.718
660.952	8.053	9.716	6.947	10.182	7.633	5.381	5.5	5.598	6.284	6.581	4.452	4.974	11.474	4.776	5.797	4.018	3.743	5.473			660.952	7.603	9.299	7.973	8.271	7.301	5.69	5.024	5.694	6.6	6.296	4.788	5.361	8.773	5.303	5.808	5.101	4.691	5.968
662.857	7.295	9	6.647	10.232	8.163	5.562	5.113	5.193	5.73	6.564	4.191	4.974	10.936	4.803	5.578	3.964	3.585	5.28			662.857	7.127	8.551	7.868	7.881	7.574	5.511	4.909	5.273	6.749	6.068	4.404	4.842	8.25	5.183	5.409	5.007	4.537	5.713
664.762	7.611	9.052	7.551	10.005	7.51	5.5	5.436	5.116	6.127	6.47	4.226	5.237	9.896	4.807	5.321	4.213	3.694	5.661			664.762	6.881	7.85	7.555	8.636	8.066	5.598	5.11	4.718	6.903	5.963	4.37	4.863	7.318	4.866	5.904	4.916	5.031	5.634
666.667	8.021	9.586	7.321	9.798	6.837	5.219	5.613	5.347	6.466	6.444	4.417	5.226	10.052	4.816	5.345	4.245	4.022	5.489			666.667	7.357	8.118	6.907	9.097	7.588	5.316	5.249	5.298	6.794	5.778	4.582	5.056	8.085	4.873	7.135	4.522	4.932	5.278
668.571	8.568	9.69	6.893	10.657	6.68	5.314	5.014	6.008	6.412	6.897	4.374	5.263	10.925	4.969	5.864	4.007	4.47	5.925			668.571	6.865	8.369	6.659	8.487	6.824	5.391	5.019	5.959	6.914	5.617	4.87	5.084	8.131	5.317	7.067	4.781	4.877	5.468
670.476	9.253	9.483	7.155	10.727	6.646	5.352	5.106	6.12	6.255	6.487	4.27	5.716	10.821	5.148	5.888	4.065	4.514	6.247			670.476	6.706	8.134	6.698	8.037	6.941	5.782	4.746	5.784	6.589	5.901	4.473	4.968	7.972	5.007	6.837	4.751	4.895	5.639
672.381	9.011	9.388	6.599	9.636	7.578	5.562	5.355	5.68	6.162	5.803	4.209	5.6	10.289	5.103	5.647	4.274	3.951	6.242			672.381	7.016	8.471	6.846	8.182	6.581	5.684	4.823	5.331	6.2	5.895	3.897	5.109	7.455	4.521	6.524	4.114	4.759	5.588
674.286	8.453	9.147	6.487	10.116	8.129	6.176	5.418	5.68	6.387	5.915	4.748	5.258	11.225	4.744	6.257	4.628	3.601	6.022			674.286	6.849	8.524	7.692	8.807	6.419	5.661	5.014	5.371	5.857	5.253	4.493	5.312	7.983	5.127	6.375	4.522	4.926	5.921
676.19	8.042	9.405	6.877	10.652	7.796	5.671	5.163	6.035	6.265	5.863	4.809	4.974	11.642	4.807	6.131	4.819	3.852	5.591			676.19	6.714	7.738	7.835	8.688	6.449	5.718	5.421	5.792	5.937	5.741	4.87	5.688	8.176	5.486	6.591	4.549	4.914	6.245
678.095	8.147	9.328	7.005	10.434	7.293	5.414	4.95	5.456	5.603	6.068	4.435	5.1	11	4.861	5.69	4.401	3.77	5.731			678.095	7.286	7.428	7.516	8.368	7.059	5.563	5.88	5.608	6.051	6.167	4.849	5.646	8.131	5.021	6.601	4.027	4.778	5.731
680	7.947	9.629	6.989	10.601	7.048	5.51	5.326	5.375	6.025	6.291	4.409	5.3	10.63	4.368	5.289	4.162	3.601	5.978			680	7.159	7.893	7.637	8.509	7.154	5.483	5.541	5.539	6.32	5.66	4.753	5.179	8.42	4.845	6.827	4.697	5.21	5.264
681.905	6.947	9.224	6.551	10.677	6.918	4.971	5.348	5.479	6.348	6.197	4.104	5.189	10.688	4.439	5.316	4.52	3.776	5.489			681.905	6.96	8.059	7.824	8.929	6.36	6.063	5.411	5.776	7.069	5.704	4.438	5.246	7.818	5.246	7.024	5.074	5.426	5.894
683.81	7.116	9.069	6.54	10.889	7.15	5.095	5.191	5.185	6.137	5.846	3.974	5.295	11.162	4.543	6.011	4.787	3.617	5.134			683.81	6.976	8.743	7.967	9.112	6.412	6.052	5.794	6.514	7.069	5.556	4.61	5.347	8.21	5.282	7.418	4.815	5.506	6.454
685.714	7.684	9.043	6.856	10.737	7.109	5.343	5.422	5.583	6.456	5.41	4.687	6.053	11.613	4.749	5.912	4.982	3.989	5.645			685.714	6.508	8.781	7.824	9.182	7.544	5.172	6.148	6.294	6.429	5.37	4.705	5.558	8.312	4.915	6.861	4.737	5.401	6.421
687.619	7.663	8.319	6.936	10.091	7.762	5.495	5.507	5.768	6.931	5.077	5.017	6.011	11.728	4.668	5.885	5.087	4.268	5.78			687.619	7.714	8.112	8.071	9.026	8.162	5.31	6.196	6.037	7.16	5.617	4.726	6.126	8.443	5.176	7.096	4.707	5.457	6.375
689.524	7.558	8.302	6.882	10.111	7.973	5.471	5.472	5.73	6.034	5.556	4.217	5.547	10.555	4.278	6.128	4.773	3.71	6.005			689.524	7.73	8.69	8.126	8.762	7.985	5.862	5.861	6.359	7.034	5.414	4.678	5.863	8.398	5.296	7.933	4.825	5.173	5.843
691.429	7.895	7.853	6.358	10.071	7.17	5.233	5.156	6	5.765	6.009	4.226	6.068	10.289	4.731	5.955	4.307	3.617	6.231			691.429	7.103	8.417	7.786	8.851	7.801	5.787	5.627	5.714	5.971	5.988	4.986	5.326	8.085	5.472	7.365	4.411	4.5	5.704
693.333	8.147	8.371	12.059	9.687	6.782	5.362	4.794	6.224	6.495	5.53	4.548	5.695	11.486	5.175	5.588	4.227	3.929	6.129			693.333	7.175	8.369	7.258	8.171	7.75	5.891	5.416	5.314	6.109	6.019	5.082	5.309	7.472	5.585	6.683	4.367	4.685	5.912
695.238	8.368	9.224	12.775	10.197	6.653	5.205	4.709	5.776	6.343	5.761	4.73	5.332	11.965	5.031	5.882	4.664	4.164	5.968			695.238	6.889	9.439	7.055	7.944	7.875	6.011	5.306	5.543	6.726	5.389	4.637	5.54	7.58	5.634	6.841	4.744	5.358	5.833
697.143	8.274	9.095	11.214	10.596	7.347	5.467	4.968	5.857	6.471	6.462	4.713	5.726	11.301	4.888	5.987	4.343	3.896	6.065			697.143	7.206	10.455	7.571	8.874	8.257	6.31	5.407	5.804	6.983	5.642	5.068	5.442	8.54	5.514	7.106	4.613	5.191	6.065
699.048	8.432	8.681	11.508	10.091	7.435	5.771	5.248	6.035	6.397	6.521	4.591	5.737	11.179	4.717	5.733	3.884	3.426	5.731			699.048	7.444	10.936	7.39	9.041	7.691	6.138	5.368	5.902	6.52	6.031	5.425	5.428	9.006	4.923	7.293	4.916	4.698	6.245
700.952	9.116	7.897	7.765	9.904	6.782	5.595	5.301	5.683	5.75	6.256	4.087	5.479	11.659	4.587	5.93	4.155	3.464	5.296			700.952	7.373	10.604	7.17	8.907	6.868	5.977	5.392	6.151	6.697	6.747	5.096	5.509	8.619	5	7.692	4.923	4.84	6.31
702.857	8.063	7.586	6.957	10.212	6.952	5.919	5.426	5.745	5.701	6.222	4.191	5.389	17.896	5.027	6.102	4.173	3.716	5.812			702.857	7.54	9.406	7.192	8.327	7.125	6.075	5.435	6.514	7.589	7.093	4.712	4.996	7.841	5.239	7.231	4.754	5.031	5.583
704.762	7.147	7.759	6.909	10.429	7.741	5.781	5.422	5.958	6.426	5.863	4.722	5.432	19.035	5.215	6.332	4.282	4.016	5.892			704.762	7.611	9.176	7.412	8.524	7.235	5.77	5.392	6.363	7.046	6.519	4.452	4.818	8.341	4.972	6.413	4.657	5.179	5.319
706.667	7.4	8.716	7.957	10.949	8.041	5.852	5.674	6.29	6.583	6.162	5.4	5.953	12.682	5.224	6.414	4.722	4.186	6.22			706.667	7.159	9.893	7.901	9.067	7.11	5.943	5.608	6.098	6.577	6.111	4.39	5.449	8.506	5.042	6.514	4.677	5.037	6.014
708.571	8.189	9.672	8.16	11.222	8.088	6.167	6.007	6.124	6.701	6.359	5.548	6.074	12.434	5.363	6.176	4.545	4.393	5.941			708.571	7.317	9.898	8.126	9.059	7.066	6.057	5.861	5.951	6.669	5.833	4.288	5.726	7.852	5.176	6.111	4.886	4.716	5.838
710.476	8.411	9.284	7.583	11.328	7.361	5.938	5.947	6.019	7.132	6.265	5.209	5.989	12.277	5.013	6.297	4.816	4.35	6.199			710.476	7.484	10.572	8.115	9.465	7.154	6.517	5.708	5.702	6.4	5.79	4.671	5.902	7.966	5.359	6.111	4.886	4.747	5.782
712.381	7.905	9.578	7.952	11.525	7.109	5.976	5.975	6.367	7.245	6.436	5.33	5.932	11.173	4.888	6.404	5.585	4.481	6.694			712.381	7.587	10.241	7.874	9.007	7.147	6.218	5.254	5.894	6.726	5.765	5.048	6.028	8.256	5.289	6.192	4.869	4.914	5.806
714.286	7.842	9.534	8.123	10.439	8.15	5.919	6.046	6.081	6.789	6.026	4.617	5.668	11.22	4.874	6.273	5.422	4.208	5.747			714.286	7.603	9.305	7.346	8.989	9.044	5.443	5.244	5.424	6.451	5.753	4.418	5.565	8.392	5.021	5.913	4.815	5.037	5.833
716.19	8.084	9.81	8.861	10.313	8.401	5.486	6.206	5.857	7.054	6.573	4.2	5.858	11.538	4.816	6.233	5.025	4.137	5.575			716.19	6.643	9.294	6.703	8.933	9.272	5.241	5.1	5.122	6.091	5.568	4.247	5.232	8.307	5.028	6.5	4.63	5.167	6.519
718.095	7.421	10.379	9.348	10.707	7.245	5.652	6.202	6.205	6.971	6.718	5.165	5.932	11.584	4.816	6.12	4.939	4.623	6.29			718.095	6.659	8.765	7.209	8.338	7.456	5.546	5.043	5.861	6.183	5.154	4.637	5.098	7.949	5.458	6.851	4.438	5.074	5.995
720	7.242	10.233	10.471	10	7.068	6.19	5.535	6.12	6.525	5.795	5.626	5.537	11.925	4.444	6.07	4.599	4.454	6.328			720	6.762	8.508	7.901	8.13	7.007	6.115	5.426	6.037	6.394	5.241	4.473	5.372	7.881	5.641	6.885	4.549	5.08	5.745

## Sheet: Figure 1E&S1C 1mM Chronic 1
		Baseline
Seconds	ROI 1	ROI 2	ROI 3	ROI 4	ROI 5	ROI 6	ROI 7	ROI 8	ROI 9	ROI 10	ROI 11	ROI 12	ROI 13	ROI 14	ROI 15	ROI 16	ROI 17	ROI 18	ROI 19	ROI 20	ROI 21	ROI 22	ROI 23	ROI 24	ROI 25	ROI 26	ROI 27	ROI 28	ROI 29	ROI 30	ROI 31	ROI 32	ROI 33	ROI 34	ROI 35	ROI 36	ROI 37	ROI 38	ROI 39	ROI 40	ROI 41	ROI 42	ROI 43	ROI 44	ROI 45	ROI 46	ROI 47	ROI 48	ROI 49
1.90476	14.04	13.078	12.444	62.957	11.897	9.396	19.457	11.146	7.065	4.935	8.444	4.739	8.129	3.904	3.905	5.215	9.23	14.811	13.612	22.216	6.374	5.353	9.188	10.409	5.327	16.579	6.972	7.943	10.992	6.759	5.845	12.802	5.243	21.67	63.02	18.298	15.859	14.269	11.588	26	13.059	16.37	7.324	15.162	10.194	22.516	28.04	19.488	25.898
3.80952	13.012	15.922	11.211	46.729	12.097	8.854	18.239	11.406	7.028	4.522	8.343	4.523	8.267	3.579	4.143	5.354	8.954	15.137	14.016	22.6	7.802	5.816	10.165	10.15	5.596	16.905	7.859	7.229	10.377	7.241	5.767	13.625	4.935	20.518	62.72	17.488	16.586	15.163	12.412	23.574	12.922	17.189	7.145	14.53	8.958	19.726	28.114	19.122	24.614
5.71429	12.613	15.752	11.925	31.757	12.834	8.583	18.196	10.99	6.991	5.152	8.788	4.739	9.109	3.202	4.095	5.181	9.851	14.853	15.31	22.555	9.143	6.551	10.753	10.178	5.923	16.305	8.31	7.1	10.346	8.036	6.55	13.729	4.776	19.009	60.4	16.375	16.781	20.25	11.603	23.812	11.706	17.465	8.097	14.718	8.653	19.411	26.664	19.378	23.682
7.61905	13.185	20.759	13.774	28.271	13.807	9.201	19.826	10.875	6.62	6.87	9.162	6.108	8.574	3.746	4.429	5.104	12.287	15.284	14.543	22.555	9.758	6.676	9.8	11.049	6.452	16.337	8.944	8.164	10.338	7.143	8.364	13.604	5	18.679	58.08	15.893	15.875	25.308	11.412	25.505	11.245	17.346	8.628	14.906	10.097	20.253	27.262	20.573	25.932
9.52381	13.017	24.078	14.038	25.543	13.621	9.493	21.957	11.073	6.204	7.522	10.545	5.829	9.535	4.509	6.476	5.333	14.471	15.432	14.488	24.049	9.418	6.919	10.282	11.372	6.683	16.411	9.014	8.057	10.315	6.732	9.047	13.417	4.841	18.723	54.46	15.738	16.102	22.038	11.533	23.089	12.157	16.638	8.2	14.462	9.153	24.979	28.523	21.024	26.568
11.4286	12.422	19.433	15.286	22.386	12.131	8.806	21.87	12	6.426	5.935	9.99	5.351	10.822	4.07	7.762	5.41	12.54	15.874	15.682	24.404	8.33	6.228	11.4	10.866	6	16.632	8.338	8.129	10.085	7.643	7.822	13.083	4.841	18.866	52.56	14.899	16.586	16.577	11.256	20	12.784	16.465	7.283	14.479	8.625	27.474	28.577	20.244	24.114
13.3333	12.786	16.759	24.03	23.1	12.497	7.965	18.761	13.115	7.324	5.761	8.192	5.658	11.218	3.561	8.095	5.889	10.839	15.842	15.651	23.865	8.022	5.941	11.224	10.87	6.413	17.474	9.07	9.114	9.146	7.866	7.031	12.656	4.458	18.5	54.54	14.595	15.961	14.51	10.724	20.842	11.353	16.874	6.717	14.162	8.389	24.853	27.517	20.963	24.25
15.2381	12.936	18.021	38.789	22.5	13.255	8.062	17.761	13.531	6.833	6.13	8.091	6.108	10.802	3.64	8.714	5.319	10.483	14.821	16.589	23.747	8.527	5.926	10.447	10.725	6.981	17.442	9.296	8.75	9.754	7.205	6.62	13.854	4.29	19.143	55.8	14.286	15.914	13.74	9.829	21.099	10.333	16.528	7.372	14.359	8.167	22.158	27.215	20.744	25.841
17.1429	11.584	21.312	42.338	22	12.945	9.833	16.348	12.438	6.435	6.326	7.808	5.946	9.515	3.947	7.524	5.389	10.782	15.495	15.891	24.102	8.549	5.956	10.165	10.895	6.279	17.832	9	8.05	10.023	6.902	6.163	12.99	4.523	19.348	54.96	13.827	17.367	13.635	8.95	20.465	10.814	16.795	7.2	14.692	9.194	20.611	26.946	19.976	25.534
19.0476	11.312	22.936	33.774	21.771	13.51	10.514	16	12.021	7.009	7.783	8.798	6.216	8.515	4.254	7.381	5.91	11	16.053	16.736	24.176	8.758	6.022	9.624	10.794	6.587	17.695	9.775	8.329	9.554	7.545	6.442	12	4.785	18.982	58.04	14.089	18.102	12.587	9.372	20.03	12.206	17.969	7.083	15.239	10.222	20.621	28.04	20.829	25.523
20.9524	12.208	21.121	25.368	22.614	12.793	10.069	17.609	12.135	7.065	6.848	9.091	5.901	9.168	5.368	7.905	5.833	10.552	16.126	17.349	24.114	9.527	6.162	9.812	11.684	7.337	16.663	9.028	8.957	8.746	7.795	6.721	13.646	4.439	19.652	58.22	14.482	16.305	11.846	9.523	19.03	11.882	19.307	6.952	15.026	10.181	21.326	30.047	20.61	25.091
22.8571	12.861	19.085	20.489	20.929	12.014	9.979	16.826	11.823	6.861	6.109	8.091	5.523	9.337	5.044	9	5.736	12.023	16.663	15.62	23.931	9.198	5.757	10.812	12.117	6.288	16.105	8.127	8.814	9.285	7.777	6.062	13.635	4.224	19.375	55.04	14.244	15.328	12.019	9.075	18.564	11.98	18.866	6.455	14.111	9.264	19.011	29.799	20.073	23.955
24.7619	12.711	18.113	17.173	17.057	12.345	9.875	15.957	11.229	6.963	6.435	7.768	6.36	7.178	4.079	8.762	5.556	12.908	15.737	15.14	23.755	8.396	5.338	10.459	11.579	5.837	16.758	8.535	8.071	9.992	7.705	5.512	13.042	4.869	19.795	55.9	14.107	16.227	12.212	9.543	19.149	13.059	18.165	6.779	14.974	9.139	16.179	29.436	21.341	25.091
26.6667	13.006	18.177	14.872	16.471	11.779	10.083	15.63	11.625	7.407	5.652	8.232	6.55	7.416	4.746	6.952	5.833	11.253	17.411	15.364	24.008	8.033	5.699	8.941	11.34	6.683	16.6	9.507	8.414	9.577	6.795	5.395	11.885	4.981	20.321	56.54	13.696	15.703	11.933	9.784	20.446	12.618	18.945	7.241	15.265	9.458	17.021	27.933	20.854	25.489
28.5714	13.665	18.688	14.977	16.471	12.317	9.854	16.543	13.406	6.713	5.63	8.838	6.144	8.436	4.711	6	6.5	10.425	18.926	16.109	24.082	9.154	6.022	9.129	10.891	7.365	16.442	9.704	8.693	9.438	7.277	4.837	13.312	4.776	20.848	56.92	13.47	15.008	12.038	10.126	20.832	12.48	18.276	8.262	15.385	9.181	15.958	28.517	20.207	24.625
30.4762	14.948	17.567	14.368	16.371	13.648	9.806	17.63	12.594	7.167	5.543	8.98	5.748	8.693	4.447	5.857	6.688	13.08	17.463	17.109	24.927	9.066	6.441	9.741	10.68	7.077	16.958	9.225	8.271	9.662	8.232	5.798	14.094	4.551	21.482	58.64	14.738	15.922	12.375	9.643	19.832	13.529	17.417	8.303	14.368	9.319	14.558	28.443	23.146	25.591
32.381	17.486	15.553	13.842	16.371	13.628	9.549	16.304	11.198	7.528	5.543	9.414	6.045	8.446	4.57	5.667	6.368	15.713	17.547	16.605	25.012	7.736	6.794	10.518	10.644	7.106	18.011	9.042	8.307	9.6	8.741	7.031	13.177	5.019	20.125	58.4	15.804	16.719	12.365	9.372	20.723	12.951	16.898	7.876	15.658	9.986	14.232	27.268	23.817	26.375
34.2857	22.428	14.298	12.398	16.8	13.683	9.396	14.891	12.594	6.602	6.413	8.697	6.577	8.03	4.149	6.667	5.146	13.885	17.442	14.31	24.371	7.451	6.787	11.082	10.939	6.606	18.632	8.423	9.55	8.969	8.866	7	14.552	5.654	19.804	55.54	14.673	16.688	12.75	9.829	20.871	12.627	18.118	7.717	17.128	10.75	13.253	28.007	25.512	26.182
36.1905	26.289	13.532	12.308	17.629	13.607	9.583	15.978	12.927	7.037	6.043	8.333	6.658	8.396	4.5	6.952	4.632	9.782	17.053	14.659	24.686	8.022	6.301	10.129	10.968	5.683	16.674	8.394	9.614	9.238	8.214	5.953	14.771	5.879	20.196	52.92	13.548	17.18	13.058	9.653	19.515	12.676	18.528	7.559	15.504	9.583	12.821	27.081	31.024	25.352
38.0952	25.879	13.262	12.895	19.1	13.772	9.944	16.217	12.125	7.157	6.087	8.485	6.586	8.673	4.886	6.857	5.382	7.989	17.726	16.395	24.886	9.549	6.559	10.8	10.891	7.019	16.105	8.915	8.129	10.562	7.696	5.248	14.188	6.009	20.384	52.8	14.304	17.766	11.971	10.201	19.881	14.431	17.614	8.869	15.744	8.333	11.895	27.114	34.293	24.898
40	25.439	14.085	12.684	20.157	14.014	10.285	17.413	12.635	7.185	7.565	8.515	6.793	8.416	4.982	8.19	5.674	8.782	17.2	16.07	25.457	10.868	7.522	11.635	11.146	7.212	18.611	8.606	8.614	11.192	7.946	5.651	14.604	5.121	20.696	53.28	14.905	17.844	11.635	9.98	21.109	15.804	17.772	8.814	15.53	8.306	12.305	27.161	33.854	26.17
41.9048	23.913	13.525	13.647	21.9	14.51	9.667	18.304	12.625	7.731	6.739	9.253	6.315	7.921	4.561	5.714	5.639	8.034	16.2	14.729	24.78	10.374	7.147	11.329	10.951	6.135	18.042	8.296	9.2	10.346	8.223	5.411	13.958	4.374	20.491	56.06	14.744	16.961	12.683	9.422	22.059	19.912	18.11	9.379	14.299	8.139	13.179	26.651	31.841	26.875
43.8095	23.017	13.156	12.82	31.186	14.51	9.833	16.283	13.406	7.398	6.043	10.586	5.297	8.594	4.158	5.952	5.507	9.287	15.253	16.132	23.804	8.648	6.581	11.729	10.919	6.26	17.463	8.366	8.643	9.208	7.92	5.132	13.594	4.495	20.277	56.26	15.202	18.414	14.192	9.91	22	36.794	19.197	9.566	15.265	9.444	12.505	27.04	32.159	27.864
45.7143	22.532	13.27	11.947	57.814	14.228	10.979	14.935	13.771	6.991	6.783	10.121	5.676	9.604	4.842	6.857	5.715	11.506	15.137	17.124	24.584	8.231	7.294	10.906	11.607	6.481	18.263	8.141	9.386	9.9	8.33	6.116	14.677	4.935	20.598	52.32	16.048	19.648	15.058	9.578	22.901	50.578	20.606	8.621	15.607	11.181	13.137	27.389	34.317	27.25
47.619	21.803	14.113	12.632	65.771	13.834	10.618	14.674	13.427	6.843	6.957	9.232	6.063	9.772	5.026	7.667	5.938	13.207	16.705	17.372	25.988	8.033	7.044	10.835	12.049	6.885	17.811	9.056	10	10.338	9.17	6.295	14.667	5.411	21.5	47.3	16.673	17.406	14.154	10.095	23.366	47.765	20.409	8.028	14.846	10.181	13.453	26.685	32.841	25.614
49.5238	20.491	15.433	13.135	47.543	12.903	10.076	15.609	13.531	7.176	7.043	9.364	5.838	9.762	5.053	8.333	5.722	12.828	17.021	17.457	26.331	8.209	5.949	11.976	11.806	6.587	18.737	9.789	9.443	9.669	8.429	5.457	14.646	5.636	22.348	46.56	15.952	17.727	13.135	10.518	22.455	42.814	19.685	7.917	14.667	8.986	13.042	26.852	27.61	25.943
51.4286	18.26	14.291	13.617	36.471	14.048	10.125	17.63	12.833	7.389	6.87	9.333	6.703	9.446	5.579	6.952	6.472	12.356	17.589	15.775	25.959	8.637	6.132	11.659	11.769	6.904	18.842	9	9.414	9.938	8.134	6.217	13.896	5.738	23.134	46.92	15.911	18.172	14.99	10.693	21.941	40.608	19.559	8.262	14.974	9.861	13.053	28.242	26.72	27.216
53.3333	18.116	13.667	13.398	31.629	14.538	9.694	18.652	12.604	7.213	7.239	8.919	6.82	8.228	4.623	7.762	6.535	13.724	18.232	15.341	25.376	8.703	6.316	11.082	11.81	7.269	17.126	7.718	9.1	9.231	8.116	6.078	12.885	4.832	22.161	43.76	16.202	17.18	19.24	11.462	21.317	38.892	19.299	7.338	16.239	10.736	12.695	27.094	28.354	26.864
55.2381	17.179	13.085	12.586	31.357	14.193	9.083	19.065	13.562	7.509	7.37	8.778	5.667	7.98	3.895	8.429	5.451	12.425	16.779	16.643	24.249	8.769	6.882	11.6	11.263	6.423	15.895	8.211	8.893	9.762	8.018	5.171	13.677	4.757	20.661	40.74	15.238	17.188	25.365	11.191	20.356	36.618	19.701	7.352	15.829	10.458	12.6	25.933	30.366	26.443
57.1429	15.584	12.61	13.045	31.114	13.966	9.826	18.717	13.99	7.741	6.609	9.253	5.712	9.396	4.939	7.238	5.771	11.563	15.853	16.372	25.098	9.418	6.985	11.471	10.858	6.673	16.695	9.732	9.007	10.985	7.58	5.977	14.896	4.991	20.929	38.48	15.619	16.977	25.798	10.724	21.455	35.951	18.606	8.131	15.094	9.236	12.126	27.255	34.256	25.58
59.0476	14.96	12.936	13.684	32.471	12.869	9.639	18	14	7	6.283	9.202	5.405	10.01	4.816	6.19	6.069	9.897	16.305	15.62	26.612	9.242	6.471	11.224	11.405	5.894	17.884	9.225	8.886	10.5	8.027	6.047	15.729	5.206	21.473	36.16	14.994	17.164	21.01	10.085	22.119	39.676	17.945	8.303	15.342	8.597	13.632	27.987	34.549	26.909
60.9524	14.642	13.326	13.902	37.157	13.517	9.396	18.739	14.906	7.009	6.239	8.949	4.955	9.178	4.14	7.286	6.069	8.782	16.2	16.194	26.335	8.231	6.529	10.965	10.968	5.971	18.6	8.521	9.671	10.354	8.527	5.853	14.031	5.14	20.634	31.5	13.762	17.289	19.183	10.08	21.752	42.931	17.638	7.448	14.991	9.792	13.968	28.658	33.402	27.977
62.8571	14.225	13.461	16.977	40.1	14.524	9.931	19.739	14.344	6.954	6.13	9.111	5.126	8.812	3.877	10.333	6.292	11.897	16.105	16.86	25.347	8.505	6.831	9.576	10.304	6.865	18.684	9.225	9.571	10.2	8.107	6.155	13.615	5.14	20.616	28	14.018	17.914	16.24	10.357	22.446	40.716	16.961	7.724	14.932	9.486	13.526	28.389	32.329	27.057
64.7619	14.133	13.071	33.684	43.4	14.414	9.688	18.761	12.833	6.685	7.522	8.98	5.955	9.653	3.675	9.762	6.271	13.598	17.221	17.426	24.829	9.143	6.096	9.812	10.777	6.452	18.526	10.366	8.779	10.377	8.116	6.357	14.75	5.607	21.848	27.08	14.464	24.078	14.144	9.538	22.653	35.343	17.748	10.048	16.026	7.944	14.905	27.43	32.354	27.523
66.6667	13.405	13.05	42.293	47.343	15.31	9.792	17.761	13.365	7.574	8	8.838	6.658	9.436	3.675	7.81	5.812	12.977	17.253	17.016	25.453	8.945	5.368	10.518	11.308	6.442	17.021	10.845	9.407	10.815	7.723	6.016	14.76	5.757	21.295	26.24	14.613	28.828	13.865	9.322	20.604	32.941	18.591	12.862	15.846	9.069	15.105	28.886	35.61	26.58
68.5714	12.087	14	32.94	44.086	15.028	9.667	17.196	12.688	7.991	7.217	9.061	6.685	8.257	4.149	9.571	5.562	11.805	16.263	15.628	25.371	8.253	6.066	10.106	11.85	5.942	17.242	9.507	9.486	10.315	7.295	5.55	14.094	5.729	20.696	26.14	13.786	26.578	12.317	9.658	20.475	36.804	18.63	15.214	15.718	10.097	14.316	29.866	35.146	25.739
70.4762	11.994	16.206	26.519	37.843	14.876	9.41	15.978	12.781	7.917	7.478	9.374	6.342	8.901	4.868	8.905	5.292	11.782	16.789	16.078	24.424	8.385	6.596	12.071	11.891	6	18.474	8.493	8.471	9.846	7.473	5.907	13.885	5.019	20.643	26.66	14.202	24.219	12.279	9.518	22.168	40.706	18.496	15.221	16.248	9.5	14.611	28.53	30.171	26.295
72.381	12.642	15.738	22.662	32.129	15.462	9.493	16.783	13.375	7.731	8.087	9.737	5.73	9.99	4.789	7.857	5.542	11.632	16.084	17.434	25.265	8.736	6.691	12.941	11.749	6.192	18.474	8.718	8.8	10.8	8.857	5.922	14.198	4.467	20.518	24.62	15.631	21.836	12.51	9.553	22.851	37.304	19.559	14.207	15.513	9.708	23.537	28.228	27.695	26.023
74.2857	13.405	14.007	17.925	25.014	14.641	9.799	17.739	13.438	7.333	8.717	8.97	5.874	9.743	4.465	7.286	6.361	15.977	15.105	17.419	26.098	9.165	6.596	10.624	10.713	6.413	18.547	8.944	9.243	10.231	9.375	5.341	14.333	5.776	21.607	23.4	16.5	24.305	11.885	9.307	21.574	33.441	19.425	13.131	15.444	9.542	29.916	28.577	27.451	26.33
76.1905	13.803	13.83	14.782	22.586	14.372	9.736	15.761	14.062	7.509	7.348	9.253	6	10.327	4.649	7.19	6.299	20.115	15.747	16.822	25.241	8.33	6.846	10.812	10.482	6.615	19.547	8.056	8.379	9.238	8.17	5.512	13.615	5.944	21.509	22.36	15.583	28.812	12.24	10.191	19.366	35.284	19.181	11.552	15.504	8.389	26.2	28.611	34.5	26.466
78.0952	13.491	14.17	14.962	23.9	14.917	10.667	14.783	13.552	8.25	5.239	9.667	5.757	11.327	5.061	6	6.035	16.253	16.705	16.829	25.073	7.462	6.779	11.4	11.182	6.76	20.6	8.606	7.614	10.477	7.473	5.202	13.979	4.561	20.634	23.04	13.661	28.031	11.567	10.181	21.04	39.265	18.496	10.048	15.154	8.167	21.4	27.651	39.89	26.352
80	12.954	14.631	14.316	20.586	14.607	10.944	17.065	12.979	8.333	5.978	9.303	5.928	11.545	4.509	5.524	6.16	13	17.263	17.837	25.163	9.209	6.75	10.918	10.717	6.808	18.842	9.099	8.121	10.631	7.143	5.233	15.812	4.804	21.143	24.12	14.25	23.938	11.615	9.08	23.099	38.235	18.583	10.021	15.547	9.528	18.568	26.604	35.207	25.841
81.9048	12.636	15.993	14.15	17.686	14.655	10.354	17.804	14.479	8.565	7.804	9.848	6.261	10.782	3.886	7.81	6.188	12.126	16.032	17.605	25.959	10.33	6.132	11.012	10.951	6.913	17.463	8.141	8.671	10.308	7.571	5.984	14.271	5.271	20.679	21.5	15.464	22.711	13.058	8.804	22.267	32.598	19.795	11.345	15.521	9.736	16.558	27.235	30.244	25.739
83.8095	11.96	25.156	14.331	18.057	14.745	11.118	16.543	13.417	8.5	8.217	9.636	6.405	10.248	4.43	8.619	6.188	12.966	14.589	16.884	26.584	8.231	5.61	11.118	11.538	6.933	17.621	7.732	8.886	9.746	7.161	6.457	12.25	5.056	20.116	21.58	14.655	25.398	12.346	9.729	21.168	32.549	19.268	11.083	14.726	9.083	15.463	27.953	33.061	26.648
85.7143	12.243	30.163	15.09	16.514	14.379	10.854	17.13	12.344	8.352	8.283	8.636	6.108	10.277	5.246	8.476	6.118	13.828	16.368	17.388	25.392	7.297	6.088	10.118	11.482	6.577	17.905	8.225	8.936	10.062	7.438	6.791	13.833	5.86	20.259	24.62	15.81	27.891	11.702	10.935	20.851	37.422	19.78	11.207	14.949	7.861	15.042	27.409	36.622	26.773
87.619	13.919	23.986	15.534	16.857	14.4	10.958	18.522	14.25	8.778	8.543	9.626	6.09	10.158	5.605	7.952	6.319	13.437	18.168	17.256	25.424	8.165	6.574	10.671	11.194	7.75	18.874	9.592	8.643	11.038	8.518	5.992	15.115	6.224	20.688	27.64	16.756	29.172	12.308	11.09	22.069	38.5	20.228	12.821	16.06	7.444	16.137	28.369	35.171	27.58
89.5238	13.844	20.617	14.368	18.629	15	10.931	20.065	14.875	7.731	8.457	10.869	6.216	11.079	4.991	6.905	6.535	12.816	17.853	17.318	26.804	8.648	7.243	10.929	11.389	8.587	21.126	9.775	9.186	11.523	8.259	6.271	15.354	5.925	20.911	27.36	15.458	26.312	12.952	11.352	23.248	36.676	19.976	13.09	16.556	9.375	17.084	29.926	32.854	28
91.4286	13.584	20.014	13.744	18.443	15.49	10.674	19.174	14.146	7.88	8.87	10.646	6.171	11.099	4.553	6.333	6.174	12.057	17.516	17.721	28.649	9.538	7.147	9.929	12.555	8.317	22.484	9.423	10.079	11.515	8.33	6.643	15.167	5.897	20.857	25.76	15.149	22.484	13.76	11.347	22.356	35.216	20.11	13.579	17.726	10.056	15.726	28.685	29.366	27.511
93.3333	13.231	22.128	14.571	17.243	15.041	10.694	17.674	14.479	8.38	9.087	10.455	6.676	10.653	5.088	7.571	6.417	13.897	18.179	16.798	30.355	9.352	6.949	11.012	12.538	7.567	21.284	8.789	9.757	11.092	8.196	6.566	15.167	6.037	20.75	24.68	15.256	22.328	14.192	12.477	21.98	36.382	19.323	14.221	17.94	9.486	16.253	28.141	27.366	26.17
95.2381	11.769	24.95	15.098	15.929	15.979	10.91	17.87	15.219	8.019	9.283	9.788	7.378	11.317	6.254	8.048	7	16.414	18.726	18.543	30.873	8.78	7.588	11.106	12.955	8.077	20.021	8.521	10.064	11.315	8.116	6.713	15.594	6.523	21.384	22.9	15.369	23.336	14.385	16.628	24.119	38.471	19.37	13.717	16.949	9.472	16.074	30.107	25.28	27.727
97.1429	13.04	23.369	14.414	15.986	16.283	11.597	17.5	14.844	8.046	9.957	10.101	7.234	11.376	5.491	7	6.833	15.138	18.8	19.186	28.694	8.626	7.221	10.765	12.891	8.788	18.526	9.775	10.043	11.846	8.446	6.558	16.094	6.262	21.438	23.46	16.101	23.695	13.394	24.367	24.594	37.275	20.701	13.221	16.538	9.736	15.358	29.268	24.012	29.398
99.0476	14.272	19.986	14.421	16.943	15.469	11.299	17.326	15.229	8.676	9.696	10.747	7.036	11.683	4.228	6.476	6.264	11.931	18.526	18.357	26.086	8.769	7.272	10.4	12.231	8.038	18.621	10.958	10.329	11.585	8.902	6.915	16.469	5.916	21.616	27.58	16.53	22.852	14.135	30.146	25.495	39.382	21.244	13.531	17.496	10.833	15.095	28.215	23.78	27.909
100.952	13.728	17.539	14.797	17.129	15.862	11.958	17.913	14.719	8.481	8.891	9.091	7.459	13.485	4.351	7.095	6.368	11.414	17.484	19.155	24.931	8.857	7.051	9.718	11.935	7.702	20.095	10.944	10.629	11.138	8.661	6.55	15.448	6.075	21.125	27.54	15.53	21.031	21.317	29.779	28.703	36.245	20.126	12.841	18.547	11.014	14.905	29.819	24.232	28.545
102.857	13.387	17.064	14.985	18.029	15.752	11.757	19.587	13.625	7.259	8.326	9.313	7.351	16.02	4.684	8	7.028	13.207	17.232	18.806	25.8	8.011	6.868	10.282	11.259	7.567	19.189	9.606	9.814	10.362	8.375	5.915	15.073	6.664	20.42	24.56	16	21.016	27.529	26.96	32.079	32.667	19.52	11.759	19.068	10.014	14.326	29.262	24.159	30.023
104.762	12.96	16.929	15.406	18.686	15.09	11.104	19.391	13.5	7.75	8.543	10.788	6.739	18.208	5.07	8.952	7.146	16.989	17.768	18.713	26.637	8.56	7.485	10.812	11.757	6.346	19.074	8.845	9.25	10.554	8.536	6.279	14.385	6.364	21.991	29.02	17.095	20.461	24.125	24.94	34.059	36.294	19.354	12.731	18.966	9.931	14.284	30.007	22.329	29.102
106.667	12.202	15.872	14.865	22.1	14.441	11.229	16.957	14.375	8.556	9.348	9.747	5.973	20.238	4.386	9.429	6.625	20.069	18.516	18.977	26.241	9.077	7.816	10.165	12.097	6.192	19.621	9.31	9.043	11.754	9.071	6.186	13.604	5.383	21.946	32.2	16.649	19.289	19.471	23.407	34.406	34.902	19.85	13.083	18.393	9.75	13.168	29.597	24.024	30.17
108.571	12.064	15.099	13.992	31.843	13.89	10.868	16.739	14.375	8.25	8.978	9.111	6.703	22.119	4.044	7.333	6.181	16.92	18.726	17.729	26.449	8.297	7.904	10.706	11.822	7.029	19.379	10.085	9.214	10.585	9.286	5.659	14.438	5.682	21.018	34.94	16.994	24.672	17.25	21.387	34.446	34.549	18.89	13.021	19.017	9	12.863	28.242	35.232	31.989
110.476	12.052	15.511	14.549	49.914	14.683	10.653	18.043	14.646	8.444	8.087	9.859	7.459	22.297	4.798	5.952	6.25	12.276	19.621	17.953	26.302	8.319	7.382	11.024	11.34	7.24	19.884	9.535	8.864	10.008	8.75	5.961	14.177	5.757	21.214	45.6	16.768	30.773	16.067	20.497	33.802	34.745	18.441	12.952	18.359	7.722	14.053	28.302	38.805	31.068
112.381	11.971	16.596	28.015	60.729	16.014	11.097	18.63	14.771	8.093	8.848	10.758	6.784	23.505	5.482	7.333	6.979	10.552	19.853	18.248	27.294	8.956	6.985	9.859	11.138	7.125	21.379	9.423	9.343	11.015	8.045	6.442	14.458	5.664	21.58	59.12	16.482	27.336	15.385	20.156	33.574	32.363	19.504	12.952	16.752	8.167	14.147	29.752	31.049	29.875
114.286	13.116	15.738	39.985	51.829	15.71	11.125	19	13.854	7.481	9.109	10.758	6.802	24.723	5.474	9.19	6.965	10.425	19.032	17.496	27.192	9.275	6.324	8.871	11.923	7.231	20.874	10.972	9.721	11.131	7.991	6.829	15.24	5.449	22.116	75.24	16.167	22.805	14.192	19.965	33.703	33.225	19.984	13.566	17.299	9.569	14.779	30.846	29.305	27.341
116.19	14.618	14.929	36.677	41.943	15.655	11.229	18.283	14.229	7.176	8.5	10.222	6.793	25.584	4.956	9.333	7.146	11.195	19.274	17.93	26.51	8.374	6.529	10.129	12.267	7.923	20.263	10.592	9.564	10.754	7.661	7.512	15.74	5.037	22.634	85	15.339	23.336	14.096	21.709	33.881	33.461	21.803	12.883	18.615	9.528	20.421	30.497	30.098	27.239
118.095	14.549	14.362	32.789	39.7	16.2	11.681	16.761	13.865	7.62	8.174	10.121	7.441	27.812	4.93	9.667	7.111	12.023	19.611	18.512	26.714	8.846	6.904	11.059	12.453	8.779	20.284	9.803	9.971	11.538	7.661	7.636	16.146	6.206	23.25	89.2	15.851	22.57	14.019	23.131	34.871	36.431	22.835	11.503	18.966	10.278	26.579	31.322	28.744	28.011
120	14.353	12.887	34.12	37.271	16.021	11.097	16.587	13.885	8.093	8.283	9.434	8.27	26.149	5.395	10.952	6.562	12.31	19.442	18.442	26.906	8.989	6.184	10.259	12.636	8.712	19.221	9.535	8.879	11.754	8.259	7.039	15.198	7	22.634	91.72	16.196	21.211	12.827	22.241	36.238	37.176	19.866	11.469	18.701	9.861	26.579	31.389	28.451	28.352
121.905	14.266	13.475	36.782	32.457	15.352	11.597	17.348	14.49	7.472	9.413	9.798	7.252	22.139	5.421	10.476	6.681	11.529	18.895	18.938	27.229	7.769	6.625	10	12.773	8.212	19.726	8.887	8.529	11.646	8.652	7.132	15.458	6.682	21.777	87.06	16.905	25.125	11.952	21.668	36.931	34.892	18.213	12.386	18.205	8.778	24.358	30.148	29.22	29.67
123.81	13.994	15.348	33.684	30.814	15.028	10.368	16.609	14.604	7.907	9.022	10.141	6.117	20.921	5.526	11.524	6.25	10.667	19.211	19.961	26.584	9.011	7.147	10.188	13.377	7.442	20.674	9.958	9.836	11.862	8.839	6.512	15.229	6.607	20.777	80.66	16.661	31.062	12.712	22.171	35.366	37.961	20.016	11.703	17.179	9.361	20.979	30.329	28.549	29.705
125.714	14.798	15.532	29.414	30.071	14.779	10.667	17.435	15.469	8.056	9.391	10.465	6.73	21.772	6.447	10.286	5.806	10.264	20.516	20.039	27.261	10.549	6.993	11.976	13.3	7.26	20.147	9.789	9.779	12.3	8.536	5.876	14.896	6.224	22.545	76.26	16.804	31.266	13.712	22.121	31.505	40.225	20.22	11.69	17.658	9.736	21.221	31.893	27.768	29.761
127.619	15.277	13.752	27.579	29.314	15.959	12.924	17.739	15.198	7.593	10.5	11.273	7.694	21.762	6.412	7.286	5.993	11.517	19.821	20.287	29.355	9.275	7.154	12.435	13.632	7.76	20.463	9.282	9.507	12.162	8.134	6.729	15.771	6.234	23.812	69.86	17.274	26.406	13.048	21.246	31.089	38.265	20.087	12.324	18.581	9.944	22.053	31.966	28.012	29.693
129.524	14.121	13.241	26.436	29.514	16.628	11.722	16.065	15.021	7.463	9.435	10.556	8.351	22	5.667	8.333	6.59	12.782	19.368	20.062	33.229	8.495	7.191	12.165	13.291	7.779	21.684	9.845	10.557	11.246	8.679	7.574	15.292	6.355	23.116	66.88	17.071	22.047	13.673	20.347	31.426	33.49	21.26	12.007	18.923	9.5	19.579	31.872	27.341	30.682
131.429	13.145	14.333	23.82	28.971	16.124	9.812	17.543	15.896	7.472	7.543	10.909	9.685	21.515	6.307	8.857	7.076	13.011	20.442	20.364	32.31	8.385	6.853	12.259	11.737	7.769	19.705	10.38	10.243	11.831	8.884	7.76	14.729	6.318	22.848	65.88	18.143	19.469	15.202	20.111	29.455	31.147	21.709	11.538	19.436	9.944	18.695	31.47	28.744	31.807
133.333	13.636	15.043	22.165	29.729	16.834	10.188	17.022	15.604	7.287	6.739	11.97	20.108	18.752	6.079	10.238	7.201	13.437	19.926	20.147	28.38	8.341	6.257	11.918	11.834	7.865	19.158	10.324	9.814	11.223	9.196	7.798	15.448	6.103	22.348	61.48	17.81	18.945	15.01	19.543	28.97	31.559	20.693	10.779	18.479	9.708	17.053	31.013	33.756	30.795
135.238	14.572	14.957	21.368	29.143	17.993	11.319	16.109	15.688	7.463	7.609	11.848	32.505	17.356	5.211	12.048	7.458	12.115	18.737	20.55	27.808	8.879	6.654	11.624	12.453	7.981	19.905	9.507	9.95	10.969	9.768	7.876	15.646	5.411	20.955	61.52	17.149	20.109	14.038	18.849	29.455	34.029	20.102	12.241	16.889	9.389	15.779	31.671	35	30.489
137.143	15.347	14.908	18.82	27.971	17.579	10.778	18.696	16.448	8.222	8.696	11.515	31.216	18.762	5.175	10.667	7.132	12.391	18.863	21	28.743	8.89	6.772	12.094	12.619	8.365	19.716	9.775	9.714	11.746	9.214	7.419	14.938	5.327	20.429	59.64	17.44	20.133	12.596	18.281	27.822	35.745	20.441	13.903	17.504	9.986	16.021	31.369	32.476	31.455
139.048	15.526	16.532	17.18	36.671	17.055	11.042	17.739	15.823	7.648	7.348	10.98	24.73	19.545	5.132	9.524	6.528	13.77	19.126	20.364	29.257	8.736	6.904	11.6	12.097	8.481	19.053	9.732	9.571	12.769	9.098	7.264	14.229	6.065	20.58	60.04	18.72	19.391	12.558	18.06	25.911	35.775	21.339	14.048	18.932	10.306	15.495	30.027	29.415	30.807
140.952	15	22.695	16.241	57.886	17.8	11.278	16.978	14.615	7.481	6.413	10.717	21.649	19.495	5	11.476	6.285	15.264	17.263	19.38	33.641	8.242	7.265	11.576	11.611	8.702	18.263	10.042	8.929	13.469	7.973	7.364	14.979	6.336	19.893	60.44	19.881	19	12.894	17.412	25.96	36.167	20.496	12.938	18.658	10.306	15.221	30.134	28.012	30.011
142.857	15.04	38.688	14.985	63.986	16.214	11.764	18.978	14.969	7.324	8.478	11.061	19.649	19.515	4.684	12.667	6.403	20.057	17.537	20.202	38.849	8.846	6.919	12.682	12.405	9.163	18.968	10.394	9.05	12.446	6.812	7.093	15.615	6.421	21.107	58.34	19.315	32.375	13.135	16.955	23.683	38.99	21.181	11.924	18.718	10.292	15.137	30.826	27.293	30.727
144.762	14.838	49.56	14.414	53.043	15.055	12.708	16.87	15.917	7.241	9.826	10.97	18.279	19.624	4.877	10.762	6.653	22.69	19.484	22.023	36.833	8.978	7.25	12.4	12.834	8.298	19.916	10.338	9.993	12.238	6.964	6.349	15.219	6.505	22.714	61	19.435	39.727	13.779	18.638	22.525	38.843	23.142	13.166	19.308	9.5	13.947	31.477	26.622	30.83
146.667	13.659	52.376	14.368	42.414	16.607	11.069	16.022	17.531	7.981	11.326	9.909	19.027	22.079	5.588	10.524	6.312	19.506	19.842	21.155	34.008	9.736	7.669	10.718	12.733	7.577	20.516	10.437	10.507	13.385	7.679	7.023	15.271	6.14	22.893	60.14	19.363	31.234	14.154	19.91	24.851	34.804	22.299	13.972	20.085	10.028	13.505	31.651	26.073	32.943
148.571	12.509	59.482	14.85	33.1	18.462	15.354	19.217	18.625	8.426	11.652	11.273	23.658	23.03	6.219	9.619	6.667	15.333	19.358	22.705	31.404	9.978	7.243	10.447	12.676	8.702	21.158	10.606	10.65	13.662	9.33	8.186	14.844	6.645	23.223	57.58	19.571	25.586	14.394	19.769	25.228	35.618	20.598	13.379	21.214	10.764	14.158	31.658	23.329	35.727
150.476	12.988	65.823	15.632	26.457	18.676	21.111	19.152	18.958	9.056	10.13	12.111	31.189	22.495	5.974	7.857	7.243	14.184	18.979	23.636	29.984	8.176	7	11.859	12.543	9.279	21.053	10.493	10.271	13.046	9.491	7.667	13.812	6.879	24.366	52.92	19	21.234	14.462	19.186	24.376	37.196	20.402	13.062	20.598	11.333	15.747	31.416	21.671	35.682
152.381	13.757	63.454	16.023	24.529	16.848	20.896	18.174	19.333	9.269	10.522	10.242	33.468	21.574	6.439	8.476	7.444	14.667	18.947	23.178	29.812	9.022	7.618	11.647	11.927	7.75	20.358	10.437	9.921	12.931	8.196	7.085	14.802	6.71	23.321	50.7	18.226	19.414	14.654	18.563	24.99	37.02	20.764	13.931	20.231	11.375	15.537	32.369	22.963	33.511
154.286	12.896	52.092	15.602	24.857	15.848	19.049	19.413	19.448	8.889	10.543	11.313	29.514	18.426	6.877	9.19	7.208	17.046	19.221	23.109	29.669	10.055	7.89	11.353	12.401	7.625	20.368	9.268	9.686	12.892	8.089	7.24	15.823	6.645	22.152	52.04	18.56	19.992	14.327	17.814	24.634	37.333	21.008	13.697	21.675	11.569	14.8	32.483	23.988	33.432
156.19	13.017	41.319	15.647	22.971	17.145	15.722	21.348	18.896	8.343	10.239	12.333	26.414	20.475	6.096	10	7.007	21.034	20.358	22.202	29.767	9.89	7.684	12.188	13.202	8.721	20.705	8.507	9.543	11.992	8.652	8.147	14.479	5.682	23.348	50.22	18.756	25.336	14.173	16.975	23.455	35.598	20.984	12.614	21.154	12.097	15.8	31.477	23.878	32.739
158.095	13.838	33.284	16.534	21.8	17.462	13.354	21.326	17.49	8.398	9.739	12.03	23.523	23.802	6.325	10.524	7.368	22.011	21.4	21.922	29.461	10.319	8.669	12.882	12.765	8.308	21.137	10.141	9.821	12.438	8.58	8.109	14.708	6.477	22.973	49.42	18.744	30.711	14.308	16.553	24.069	34.804	21.173	13.979	20.556	11.069	15.242	31.785	23.293	32.398
160	13.63	27.525	17.549	26.257	18.021	12.688	18.761	17.198	9.509	9.457	12.333	20.342	25.505	6.956	8.476	7.854	22.724	20.516	21.977	29.441	10.308	9.103	12.447	12.798	7.894	21.663	10.746	10.993	13.723	8.339	7.729	17.375	7.29	22.562	49.2	18.595	32.312	15.173	16.085	25.97	36.725	22.764	15.462	21.06	10.931	15.095	31.785	23.805	33.841
161.905	12.855	23.979	16.932	28.129	18.152	12.889	18.565	17.562	9.074	9.5	12.747	20.595	27.574	6.412	7.81	7.639	24.103	19.779	21.992	37.167	10.033	8.485	12	12.996	8.029	21.747	10.507	10.829	14.138	9.393	8.109	16.75	7.542	23.821	46.44	18.321	29.07	16.096	15.442	27.772	36.618	22.543	14.917	20.462	11.292	15.789	30.946	24.902	34.193
163.81	12.665	21.461	16.278	27.129	17.8	12.271	20.783	17.469	7.972	8.935	12.697	24.64	26.594	5.868	7.286	7.486	23.92	19.926	21.504	37.959	9.56	7.89	12.871	12.279	7.933	21.347	10.521	9.821	13.5	9.518	7.682	16.385	6.832	24.607	44.34	16.792	24.148	15.663	14.256	27.535	36.137	22.89	14.09	19.761	11.403	14.779	30.718	24.841	35.67
165.714	13.636	18.972	19.361	31.9	19.179	12.486	20.674	17.177	9.157	13.565	11.576	27.685	26.683	5.912	8.667	8.049	21.034	20.463	21.527	36.702	8.879	7.331	13.118	12.186	9.135	21.463	11.085	10.2	12.623	9.804	7.527	17.927	6.262	25.438	41.38	17.131	22.609	16.106	13.774	26.822	37.216	22.213	14.317	20.667	11.542	15.063	32.658	25.683	35.364
167.619	14.838	17.965	35.331	39.8	20.193	13.694	19.696	17.865	8.954	15.761	11.606	26.225	27.921	5.974	8.857	7.979	16.287	21.074	23.085	37.914	9.912	8.176	11.824	13.466	10.192	22.389	12.352	10.393	12.962	10.054	7.736	17.906	6.533	26.777	39.54	18.738	21.5	15.269	14.508	28.812	38.373	20.583	15.8	20.838	12.611	22.021	33.43	36.695	33.795
169.524	14.96	17.901	46.744	61.243	20.083	13.222	20.087	18.448	8.481	12.63	11.758	22.495	26.733	6.035	9	8.014	15.241	20.442	23.093	42.449	10.736	8.956	10.835	14.255	10.087	22	12.254	10.693	13.1	9.884	8.031	18.354	6.701	26.464	39.18	19.952	21.195	14.269	15.286	31.931	39.52	21.669	16.048	20.872	12.833	27.947	31.96	45.22	34.227
171.429	14.208	17.837	39.211	71.471	20.772	12.16	20.435	18.375	8.833	13.5	12	20.378	25.297	5.912	9.333	8.174	17.437	20.011	23.62	50.559	10.077	8.801	11.835	13.951	9.25	22.305	11.944	10.286	12.862	10.17	8.814	17.729	7.598	25.429	37.82	20.44	20.797	15.125	15.618	35.168	37.471	23.693	16.028	21.359	12.792	28.695	32.268	38.622	34.682
173.333	15.121	18.17	30.451	54.286	21.8	12.354	20.022	18.688	9.056	12.5	12.374	22.243	23.723	6.211	7.619	7.896	19.161	20.084	25.597	45.763	9.659	9.574	12.682	13.498	8.029	22.095	12.211	10.736	13.477	10.009	8.628	17.135	7.907	25.036	36.56	20.482	19.602	15.087	16.709	38.287	36.549	23.598	17.11	21.111	13.097	26.905	33.389	34.573	33.159
175.238	15.775	17.667	24.707	38.943	23.952	13.188	19	19.792	9.343	9.739	12.697	26.919	22.713	6.088	7.857	8.174	22.747	20.347	24.194	39.706	9.824	9.176	11.518	13.073	8.356	21.274	10.958	11.914	14.631	10.446	8.45	17.354	7.178	25.098	33.18	19.381	20.086	16.038	18.191	40.267	40.108	22.268	16.579	21.538	11.958	23.316	33.503	38.012	32.5
177.143	15.225	18.248	19.827	32.271	25.497	13.576	20.196	19.875	8.806	9.609	13.02	30.829	22.554	6.149	9.381	8.965	26.621	19.463	22.791	42.016	10.473	8.368	12.2	13.648	9.808	23.379	10.69	11.65	14.177	10.786	8.512	16.75	6.561	25.893	30.24	18.28	21.594	16.308	25.879	44.079	41.461	22.472	15.531	21.932	11.917	22.053	33.43	38.317	33.966
179.048	15.474	19.674	18.669	28.857	23.972	12.91	21.783	19.219	9.296	9.326	12.798	31.063	21.337	6.553	9.048	8.653	24.322	19.337	23.791	41.176	10.385	8.316	12.976	13.968	10.462	23.958	12.07	12.129	13.785	10.812	8.364	16.615	6.907	27.188	31.5	18.702	21.25	14.837	35.126	45.545	39.686	22.575	14.6	21.094	13.306	22.084	33.544	37.427	35.182
180.952	15.358	18.844	18.195	27.943	23.793	11.438	22.043	18.958	9.102	8.739	12.141	27.802	23.554	6.368	8.762	8.035	16.897	19.095	23.744	36.878	9.077	8.551	11.365	13.595	9.798	21.4	11.577	11.671	14.131	11	8.349	16.75	7.243	26.509	30.84	18.304	20.617	14.212	34.603	44.95	37.059	21.11	13.566	20.658	12.444	21.379	32.886	39.585	35.148
182.857	14.358	17.007	16.383	27.143	23.097	10.819	20.087	17.802	8.241	9.522	11.889	24.982	25.594	5.886	8.429	8.229	11.057	18.547	22.597	38.351	8.802	8.618	11.459	14.016	9.01	19.8	11.07	9.85	13.054	9.589	7.752	16.615	7.075	25.75	28.76	17.565	21.156	14.163	30.834	44.04	37.265	20.614	12.966	21.017	11.542	20.158	32.121	41.22	35.75
184.762	14.445	17.035	16.421	25.1	22.917	11.667	18.217	17.333	9.074	10.152	12.626	25.631	25.485	6.333	11.095	8.521	10.069	19.389	21.783	37.31	9.681	8.272	10.965	13.506	9.654	20.832	11.155	10.886	12.346	9.062	7.186	15.312	6.776	26.188	29.64	18.214	33.023	15.058	28.97	45.545	38.392	20.709	12.49	21.462	12.528	20.411	32.98	40.098	35.727
186.667	15.41	17.738	16.083	25.529	24.448	11.368	19.783	17.292	9.481	9.087	12.131	27.153	25.673	6.421	13.571	7.944	10.437	19.116	23.357	35.078	9.736	8.176	9.671	12.162	9.51	20.684	10.606	11.043	12.592	8.768	7.891	14.417	6.935	24.696	28.82	18.714	38.508	14.99	28.116	41.99	35.784	20.37	12.428	21.556	12.306	21.084	31.926	37.768	34.159
188.571	16.451	17.539	15.602	26.786	23.366	10.188	20.522	17.042	8.852	9.696	11.303	26.315	26.406	5.561	12.619	7.549	10.023	18.179	23.915	33.392	8.736	7.331	11.271	12.51	9.481	19.684	10.634	9.029	12.523	8.446	8.078	16.427	6.897	23.161	27.92	18.149	30.18	14.327	28.608	37.921	31.284	21.638	12.89	21.624	11.597	21.379	32.114	35	33.773
190.476	17.85	17.539	16.391	27.243	22.028	9.771	20.674	17.677	8.63	9.891	12.152	22.252	29.822	6.175	15.429	7.535	10.414	19.326	21.372	38.429	9.505	7.294	12.541	13.49	9.337	20.453	11.577	9.4	12.4	8.964	7.868	17.635	6.766	23.196	28.4	18.536	25.273	15.135	31.09	37.495	29.618	22.764	14.083	25.436	11.653	20.842	33.658	35.549	33.625
192.381	19.717	17.801	15.85	29.357	21.572	10.208	21.217	17.76	8.694	10	13.626	21.514	31.772	6.526	16.429	7.542	10.195	20.347	21.341	43.914	10.231	8.257	11.447	13.421	8.971	19.526	12.62	10.307	12.262	8.714	8.527	16.896	7.43	24.545	28.26	19.077	22.125	15.548	32.296	36.079	36.863	22.661	15.09	31.88	10.028	19.021	33.336	39.841	35.011
194.286	21.399	17.128	14.368	32.7	20.379	12.153	20.913	18.979	9.074	46.413	13.768	24.892	29.673	6.439	14.429	8.257	9.54	21.621	22.62	42.849	10.549	8.684	11.259	12.785	10.048	19.253	12.676	10.686	12.754	8.366	8.946	16.698	7.766	25.366	27.14	18.399	21.344	15.529	31.698	36.465	43.235	22.512	15.428	38.325	10.708	18.726	33.456	38.427	37.33
196.19	23.139	17.234	15.241	37.271	19.476	12.917	22.913	20.958	8.491	53.87	12.283	28.162	27.683	6.5	15	7.993	10.218	22.358	22.535	43.29	11.077	9.118	12.659	12.984	9.625	20.305	11.761	10.871	13.646	8.688	8.24	16.604	7.28	25.312	28.32	19.589	20.82	16.096	32.94	34.97	39.814	22.843	15.117	41.179	11.75	19.821	34.188	34.024	36.636
198.095	25.035	18.021	16.316	46.271	18.345	12.375	22.935	19.906	8.259	20.348	11.899	26.748	27.416	6.289	15.476	7.75	10.92	21.242	22.93	38.735	10.033	9.75	12.941	13.267	8.99	21.232	11.423	10.357	13.715	9.384	7.798	16.375	7.047	24.473	28.62	20.44	20.133	16.038	32.583	32.861	33.725	22.929	15.172	39.812	11.319	22.8	33.886	31.939	35.466
200	27.925	17.553	15.962	58.2	18.4	11.417	20.174	18.271	9.454	12.565	12.202	23.595	26.069	5.333	15.905	7.979	12.368	20.516	24.535	34.367	9.308	8.61	12.2	13.538	9.51	21.779	10.915	11.143	14.454	9.259	8.752	16.583	7.019	24.241	25.58	19.905	20.531	15.192	30.241	30.396	30.01	22.213	14.917	37.735	12.778	26.042	34.034	33.134	37.409
201.905	27.636	18.043	15.962	57.214	19.586	11.188	19.065	18.396	9.565	10.826	12.616	23.541	24.139	5.132	15.429	7.938	16.609	19.232	25.333	37.033	9.22	7.882	12.2	13.543	9.788	21.168	10.718	12.757	15.192	9.527	9.302	17.49	6.935	24.562	26.66	19.875	21.086	15.067	30.161	28.772	32.912	22.094	14.303	36.188	12.722	26.474	34.711	39.671	37.511
203.81	24.815	18.674	15.376	46.214	19.814	12.604	17.783	18.698	9.75	11.739	13.929	23.973	22.871	6.86	11.905	8.222	16.69	19.358	23.101	36.857	10.396	7.919	12.247	13.061	10.115	22.105	11.662	12.286	15.085	10.107	9.605	18.01	7.411	25.259	28.14	20.345	20.391	16.558	31.734	29.218	39.775	22.008	14.034	34.231	11	24.747	34.094	39.829	34.989
205.714	23.272	18.326	15.474	38.786	20.4	12.326	18.261	18.917	9.88	12.326	14.273	23.964	22.733	7.351	12.619	8.035	13.253	21.874	22.628	40.673	10.681	7.515	12.129	12.587	9.606	22.653	12.225	10.986	14.492	9.491	9.69	16.979	7.439	26.375	28.64	21.435	20.047	17.577	33.02	29.673	41.461	21.701	13.959	32.675	9.611	23.105	35.208	35.146	35.773
207.619	21.936	18.667	16.068	32.786	20.89	11.285	21	19.677	9.509	10.957	13.899	22.73	26.535	7.044	16.429	8.375	13.161	21.505	24.031	41.91	10.396	7.787	11.365	13.547	8.49	21.726	12.394	11.057	13.731	8.25	8.69	15.323	6.673	25.812	30.36	21.952	18.867	18.971	33.025	27.485	35.569	21.89	14.462	30.641	11.028	21.084	35.423	37.695	37.307
209.524	19.399	18.298	16.436	28.8	20.352	11.542	19.848	19.938	9.537	10.891	13.374	21.919	28.099	6.421	16.429	9.542	16.494	20.589	23.969	36.971	10.934	8.331	10.588	13.749	8.721	20.463	12.845	11.529	13.915	8.268	8.023	14.969	6.701	25.58	27.98	21.268	18.133	25.625	32.769	26.238	34.451	20.654	16.221	28.188	13.319	20.042	35.007	40.207	35.943
211.429	17.312	17.695	16.233	25.871	20.738	11.278	20.174	19.729	9.481	10.413	12.343	24.829	26.772	6.325	15.095	8.674	25.874	21.211	24.178	34.371	10.44	7.846	10.776	12.215	9.644	19.947	12.831	10.836	13.538	8.768	8.116	16.76	7.093	26.562	28.24	21.577	18.477	29.817	33.477	27.921	39.382	21.772	16.731	26.487	13.236	19.811	34.658	40.988	37.602
213.333	17.642	17.773	14.842	22.914	20.676	11.271	19.783	18.354	9.954	9.913	11.232	28.288	26.099	6.851	12.476	7.604	28.517	21.2	24.628	34.233	9.868	7.86	10.859	12.632	10.538	20.674	12.338	10.693	13.154	8.652	9.225	17.229	7.57	25.643	32.62	23.679	18.453	26.125	33.397	29.683	37.48	22.78	14.628	26.718	13.069	20.642	34.188	40.634	39.318
215.238	16.844	18.397	14.722	22.029	20.379	11.84	18.609	18.396	9.833	10.565	11.253	27.937	23.634	6.86	10.857	7.931	23.115	21.937	24.651	36.392	10.066	8.066	10.588	13.591	11.221	21.905	11.93	11	13.785	8.714	10.031	17.125	8.028	24.491	32.32	25.685	19.141	22.192	33.171	28.762	35.275	21.882	12.986	27.316	12.847	21.221	34.812	40.902	38.432
217.143	15.127	18.489	15.368	21.486	21.366	12.715	21.826	19.24	10.083	11.196	12.667	28	21.465	6.842	10.095	8.382	20.448	22.021	24.411	34.829	9.593	8.39	11.059	13.838	10.462	22.453	11.944	10.95	14.931	9.339	8.589	17.26	7.953	24.616	34.96	26.625	20.609	21.442	33.714	27.802	35.157	22.89	14.455	25.179	13.681	20.895	34.893	40.39	38.784
219.048	13.913	18.078	15.677	19.4	23.083	12.979	21.304	19.979	10.87	12.152	13.505	31.27	19.416	7.07	9.333	8.667	20.08	21.221	25.891	35.669	9.165	8.515	12.965	12.899	9.433	21.726	12.732	11.643	13.723	9.214	8.349	16.323	8.29	25.58	39.48	28.881	21.133	19.952	32.236	30.05	32.961	22.803	15.745	23.274	14.514	19.737	35.597	37.146	37.17
220.952	14	18.908	16.85	19.1	25.09	12.396	20.978	20.979	10.185	10.696	14.323	36.937	17.871	6.746	10.429	8.632	28	20.442	26.202	36.437	10.11	8.64	13.612	12.579	9.971	21.316	12.225	11.557	12.654	9.268	9.581	15.427	7.561	25.321	49.36	30.976	21.227	18.673	29.663	36.396	30.971	22.567	14.841	23.504	13.736	16.589	37.007	42.037	35.898
222.857	14.908	19.447	16.211	19.314	27.276	12.007	21.739	19.573	9.565	11.391	13.758	37.279	15.802	6.395	10.429	8.465	33.287	20.137	23.403	33.433	10.374	8.757	12.282	12.943	10.077	20.632	12	10.864	13.054	8.83	9.589	15.458	6.916	23.982	62.94	29.988	19.961	19.394	29.151	41.446	31.471	23.417	14.566	23.855	13.125	15.189	37.396	44.817	37.5
224.762	14.191	18.589	16.195	18.229	31.91	12.472	19.217	20.76	8.963	13.37	12.556	31.811	14.238	6.465	8.714	8.062	26.494	20.074	22.93	32.4	8.813	8.522	11.894	13.316	10.365	20.042	13.493	11.329	13.892	8.893	10.434	15.198	7.224	25.464	81	28.673	19.125	19.49	29.452	42.99	32.961	22.764	13.428	23.12	12.028	15.432	36.718	39.72	38.648
226.667	13.104	18.326	22.233	18.157	36.055	12.521	17.043	22.271	9.583	12.37	13.293	28.063	14.03	7.667	8.905	8.444	20.402	20.842	25.496	33.645	8.132	9.206	12.047	13.109	9.702	20.547	13.141	11.921	14.323	9.125	10.341	15.552	6.617	27.411	97.12	29.071	19.922	20.192	29.02	43.871	31.775	21.874	12.834	23.496	11.917	16.937	35.107	39	38.909
228.571	13.566	18.681	37.481	19.529	36.641	12.611	19.652	21.344	9.852	10.783	14.495	27.207	12.822	7.825	8.905	9.049	22.851	21.526	24.899	35.437	9.769	9.676	13.024	12.628	8.692	20.589	12.423	11.171	12.931	8.929	9.636	16.667	7.645	27.75	102.78	29.667	20.695	20.971	30.191	42.634	33.059	21.992	14.834	24.957	11.639	17.558	35.322	39.317	39.795
230.476	13.624	19.709	43.82	20.443	35.379	13.542	23.5	19.75	9.213	10.935	14.273	26.432	11.594	6.728	8	9.118	32.092	20.642	23.256	35.253	11.615	9.522	13.141	13.065	10.279	21.358	13.239	11.307	12.954	8.732	10.473	16.573	8.607	27.179	99.52	28.036	20.602	19.567	32.302	43.356	36.265	21.906	15.207	24.829	12.042	15.568	35.893	41.573	37.955
232.381	13.503	20.326	34.586	21.143	32.834	12.958	20.565	19.969	8.954	12.239	13.798	26.523	11.317	6.404	11.619	9.639	32.816	19.421	23.636	34.18	11.154	8.912	11.788	13.47	11.096	23.653	13.338	12.093	14.415	8.357	9.899	17.021	7.766	26.795	88.36	26.923	19.461	19.423	31.186	45.307	38.931	21.858	14.497	22.513	12.347	14.674	37	46.463	37.102
234.286	13.896	19.177	25.12	23.071	30.759	12.743	18.348	21.792	8.269	11.391	14.717	28.649	11.861	6.579	17.476	9.812	25.448	20.179	23.597	34.963	9.286	8.794	11.965	13.409	10.01	23	12.845	11.686	15.215	8.955	9.992	16.188	7.551	27.92	79.06	26.518	19.961	19.692	29.839	48.079	38.735	22.874	14.51	21.744	11.653	16	36.624	43.11	38.17
236.19	13.913	18.262	20.985	23.843	30.89	13.201	20.674	21.052	9.194	12.239	14.354	30.586	11.644	6.754	16.524	8.708	22.92	23.295	23.674	35.898	10.143	8.912	11.988	12.814	9.183	22.737	11.69	11.229	15.215	9.223	11.705	14.615	8.355	28.312	76.78	25.345	19.797	20.712	32.08	53.525	34.363	23.646	14.69	22.342	11.583	15.253	33.919	36.927	40.602
238.095	13.96	18.936	19.992	30.7	30.786	12.764	19.804	19.802	9.37	13.609	13.465	30.306	10.515	7.07	12.619	8.215	27.471	23.484	24.481	35.763	10.879	8.529	12.553	13.462	9.24	23.989	9.958	11.621	14.369	9.33	11.822	16.188	8.364	27.92	79.5	25.31	19.727	20.952	33.156	56.158	29.441	23.457	14.062	23.051	11.556	15.747	34.362	34.207	42.909
240	14.595	19.631	17.977	56.471	30.366	13.278	18.739	19.698	9.444	14.326	14.162	28.324	11.05	7.544	13.381	8.597	30.701	21.768	24.388	35.176	10.099	8.875	13.329	14.543	9.365	23.905	10.577	11.686	13.1	9.339	11.915	17.438	8.028	28.991	81.42	25.042	20.875	18.779	32.156	54.653	30.196	23.669	13.29	22.846	11.181	15.874	36.289	33.659	43.534
241.905	14.919	19.418	17.308	73.171	30.124	13.861	19.065	20.698	9.944	13.913	15.717	29.973	11.366	7.579	16.571	9.257	28.08	21.905	23.682	34.62	9.879	8.801	12.471	14.15	9.558	23.979	12.648	10.921	13.2	9.188	13.822	17.021	8.131	29.866	76.5	24.75	22	17.788	31.563	53.98	36	23.244	14.055	22.726	11.111	14.8	36.866	36.049	42.17
243.81	14.277	19.496	16.759	60.286	29.524	13.729	20.065	20.531	10.009	12.217	14.768	31.91	11.02	7.368	14.952	9.701	27.598	21.747	23.729	33.42	9.341	8.309	12.024	13.19	9.74	23.484	12.535	11.2	14.231	9.411	14.45	18.125	7.374	28.446	71.8	23.375	34.906	17.385	30.302	56.574	40.196	22.457	15.166	25.35	12.236	15.737	36.705	40.988	41
245.714	13.711	18.936	16.444	43.914	28.917	13.035	19.848	21.094	10.361	12.109	13.04	30.405	10.871	6.974	14.095	9.396	26.437	20.537	24.217	32.49	10.121	8.412	12.329	12.988	10.096	24.632	12.352	11.193	14.269	9.562	14.729	17.396	6.411	26.893	72.62	21.845	42.406	16.904	29.764	55.386	37.412	22.693	14.572	25.128	12.208	15.547	38.101	44.439	42.284
247.619	14.416	17.908	17.03	34.657	28.317	12.604	19.348	21.521	9.019	15.13	13.859	27.306	10.228	7.263	18.429	9.507	26.506	20.274	24.426	33.265	9.901	8.721	12.071	12.83	11.029	25.432	12.042	10.7	14.154	10.429	14.907	16.354	5.579	26.875	68.76	21.363	31.859	15.721	29.296	55.396	33.569	22.969	12.607	22.744	11.125	15.137	38.785	46.012	40.591
249.524	14.994	18.532	17.737	31.286	25.979	11.771	19.326	21.198	8.352	16.391	14.657	25.234	10.634	8.202	19.333	9.528	31.034	22.011	25.318	32.861	9.868	9.551	10.459	12.619	10.385	25.568	11.972	11.65	14.162	9.982	14.922	16.281	7.084	25.938	60.98	21.369	24.812	16.029	28.96	54.723	33.392	21.567	13.441	23.59	11.292	15.4	37.51	45.537	37.932
251.429	14.451	19.085	17.053	27.286	25.517	11.306	18.761	20.802	9.148	14.522	13.455	26.081	9.822	7.868	17.524	8.792	31.747	22.074	25.853	32.845	10.231	8.654	10.435	12.66	8.885	26.126	12.352	11.986	14.415	8.643	14.496	16.51	8.252	25.054	54.98	21.786	22.031	17.346	29.653	51.505	32.843	21.906	13.345	23.291	11.861	15.737	35.718	41.756	36.068
253.333	14.41	19.135	15.346	23.643	25.634	12.479	20.022	21.208	8.972	12.804	12.323	30.243	9.396	7.5	17.238	8.743	28.839	22.421	24.961	32.951	10.165	8.051	12.718	12.291	9.462	28.653	11.014	11.779	14.015	9.455	13.558	17.042	8.215	25.938	49.66	21.042	20.289	17.423	27.342	53.96	32.186	22.906	11.89	23.556	12.764	15.758	36.765	44.829	38.932
255.238	14.809	19.191	15.865	22.243	24.29	12.736	18.935	20.49	8.667	11.804	13.232	33.775	10.792	6.93	16.667	9.083	26.425	24.463	24.264	32.482	9.648	9.235	13.188	12.49	10.731	29.516	11.676	11.743	13.7	10	14.667	15.927	8.682	26.973	44.78	20.655	19.711	17.115	24.683	57.673	27.392	21.457	14.021	26.017	12.792	15.695	38.02	49.256	41.614
257.143	14.37	19.121	16.459	20.114	24.159	12.875	17.478	18.865	7.907	11.783	14.061	31.937	11.178	6.614	15	8.681	26.471	26.884	23.481	33.608	9.824	8.434	11.6	13.794	10.538	28.116	11.676	11.014	14.531	8.179	15.202	16.198	8.056	27.366	43.1	20.327	19.922	16.846	23.151	58.228	25.314	20.504	14.89	25.752	11.444	15.253	37.906	43.183	38.932
259.048	14.312	19.532	15.534	19.914	23.262	13.396	20.543	19.135	8.065	11.913	13.859	29.387	11.228	7.43	16.048	8.59	28.586	27.358	23.178	33.196	9.725	8.11	10.671	14.065	9.894	26.105	10.662	11.521	14.977	7.661	15.271	16	7.701	27.625	43.72	19.607	19.312	16.654	21.613	58.366	29.529	20.945	13.152	24.496	10.944	15.389	36.98	37.939	37.534
260.952	15.422	19.17	14.429	19.414	21.772	13.049	21.761	19.844	8.685	12.848	13.939	24.919	21.574	7.833	17.286	9.139	27.069	29.084	23.519	32.91	8.978	8.772	12.271	13.575	9.221	24.347	11.085	11.979	14.754	8.554	14.326	16.323	7.383	26.482	43.16	19.827	18.758	15.99	22.06	56.525	31.598	22.425	13.269	24.256	12	16.189	35.248	41.488	35.92
262.857	16.006	19.05	14.113	20.1	22.828	13.083	21.891	21.74	9.194	12.804	14.556	22.477	34.248	7.553	18.381	9.111	23.885	44.379	24.101	33.682	9.747	9.088	12.447	13.385	9.337	23.832	11.606	11.536	14.108	9.232	12.922	17.781	7.664	26.402	39.12	20.708	19.773	16	24.126	51.139	37.49	23.157	15.179	25.487	12.764	17.074	35.383	42.866	36.159
264.762	16.11	19.298	15.624	20.357	23.697	12.59	21.152	20.771	9.741	11.739	13.919	25.09	34.277	7.289	16.952	9.382	29.011	60.442	23.837	33.233	10.154	9.647	12.788	13.968	9.519	22.989	12.268	11.486	14.362	9.009	12.45	17.406	8.093	27.009	40	20.381	20.672	17.115	28.905	47.762	43.853	22.205	15.29	26.769	13.236	17.179	35.523	37.695	39.557
266.667	16.191	20.156	16.947	19.9	23.207	12.514	19.152	20.198	9.241	11.13	12.545	27.622	28.762	7.535	17.571	9.347	30.92	61.916	23.86	31.935	9.714	8.89	13.765	14.235	9.875	22.642	11.549	10.521	15.215	9.429	12.07	17.969	8.112	26.527	39.26	19.655	21.414	16.558	30.799	50.446	41.167	22.094	14.283	25.752	13.833	16.705	36.477	33.793	42.784
268.571	16.249	21.418	17.496	20.8	23.228	13.243	20.696	22.323	9.102	11.087	12.677	28.973	26.356	7.746	16.571	8.868	24.885	54.737	26.209	32.118	9.857	8.331	13.141	13.883	10.663	21.863	11.239	10.414	15.054	10.152	11.419	17.573	8.383	25.527	34.7	20.738	20.883	16.423	27.397	55.426	35.647	22.37	13.193	24.256	14.917	21.158	37.376	37.89	42.193
270.476	17.318	21.674	16.571	19.971	23.924	12.583	19.804	21.75	9.074	11.326	12.939	27.883	28.663	8.088	13.952	8.764	27.655	48.663	26.287	32.233	10.824	8.691	11.859	13.324	10.337	21.484	11.972	10.7	14.377	9.143	10.457	17.542	7.617	26.509	34.4	22.107	21.031	17.442	24.392	56.723	34.059	22.685	12.352	24.983	15.208	27.4	36.993	43.366	44.08
272.381	19.723	20.56	15.895	19.057	27.572	12.535	19.696	22.479	9.222	11.5	12.545	26.099	29.99	8.518	15.619	9.424	29.931	45.295	26.597	30.959	10.121	9.287	10.706	12.931	10.817	21.737	11.775	10.6	14.831	8.536	9.853	17.885	7.084	28.696	35.46	21.036	20.664	16.99	21.653	56.099	35.412	23.339	14.021	25.667	14.569	27.4	36.436	41.768	45.443
274.286	21.116	18.915	16.331	19.5	31.931	12.674	21.804	23.156	9.111	10.348	13.283	24.387	28.149	8.281	15.81	8.986	24.793	41.179	26.442	30.273	9.813	8.978	11.365	13.421	11.337	21.589	12.169	10.586	15.408	8.607	9.271	17.385	7.673	27.643	33.24	19.929	19.984	18.077	18.492	54.624	36.196	23.78	15.434	25.137	12.75	24.695	34.913	41.549	43.318
276.19	23.139	18.688	16.662	19.771	37.331	12.382	20.457	22.406	9.213	11.326	14.141	22.973	26.475	8.053	17.571	8.722	26	39.221	26.543	31.959	11.44	8.485	12.024	13.283	11.01	22.368	12.775	11.164	14.577	10.714	9.302	18.281	8.57	27.438	30.74	20.679	20.641	29.76	18	53.307	32.059	22.976	14.462	24.231	13.111	26.221	35.322	40.256	46.534
278.095	24.671	19.277	16.88	20.029	41.538	12.194	21.261	22	9.954	13.565	14.545	24.559	29.059	8.632	18.048	9.653	31.667	39.379	27.178	33.131	12	8.632	11.729	14.194	10.894	21.905	11.394	12.043	15.138	11	10.085	18.385	9.056	28.821	30.78	21.565	20.766	41.913	18.563	54.505	24.833	22.709	13.31	24.581	14.292	28.989	36.289	36.902	52.648
280	24.098	19.05	16.218	22.029	41.428	11.361	20.043	22.021	10.12	13.826	14.586	23.856	32.455	8.579	13.143	9.868	30.966	38.768	25.372	32.469	11.165	8.713	11.729	14.356	10.529	20.589	11.042	11.221	16.385	9.527	10.62	16.823	9.542	28.589	31.76	20.476	26.453	41.058	17.829	54.198	20.824	22.85	12.379	25.291	12.014	30.379	35.57	37.598	54.602
281.905	24.15	19.149	16.316	25.286	39.772	12.208	18.63	23.885	10.111	13.065	14.768	23.072	33.644	8.298	12.095	10.007	26.782	36.579	25.736	33.2	10.846	8.132	12.906	13.364	10.587	21.495	12.07	10.286	16.492	8.786	10.45	17.146	9.393	28.196	34.5	19.804	39.266	34.346	18.432	55.178	19.206	22.37	13.71	25.479	13.347	28.453	35.758	38.549	56.33
283.81	22.942	20.695	16.947	27.1	39.269	13.007	19.717	24.073	9.583	13.87	14.606	24.054	31.703	8.158	14.286	9.028	26.092	32.537	27.574	33.71	10.813	7.853	12.671	13.887	11.317	21.8	12.69	11.357	15.454	8.67	10.659	18.167	8.944	27.134	34.66	21.071	38.93	28.01	18.387	54.98	19.088	22.827	15.097	24.897	15.556	25.158	35.886	37.354	60.011
285.714	21.647	20.255	17.489	38.557	38.407	12.854	18.804	22.844	8.898	15.283	14.283	25.874	29.436	8.193	14	9.444	25.184	26.789	29.248	33.045	10.088	8.779	12.153	13.676	11.087	21.684	13.113	11.993	15.131	9.759	11.031	17.896	8.869	27.848	31.82	22.845	28.93	25.077	17.116	52.644	21.598	23.087	14.497	24.128	14.139	23.979	35.114	34.695	58.636
287.619	21.081	19.284	17.549	62.986	39.062	12.59	21.739	22.406	8.889	14.413	14.414	28.441	27.663	8.754	12.619	10.66	26.862	24.442	29.155	32.616	10.582	8.743	13.035	13.19	10.25	22.495	12.282	11.536	15.692	10.357	10.837	16.594	9.458	28.848	29.32	24.298	25.258	22.788	16.377	54.802	24.069	23.472	14.731	23.983	13.653	23.179	36.51	33.451	57.068
289.524	19.393	19.787	16.579	68.086	40.566	13.083	24.783	22.135	8.852	13.478	13.273	28.541	26.238	7.833	12.381	10.889	30.011	24.758	30.496	33.31	10.681	9.316	12.659	14.024	10.798	24.189	12.394	12.186	15.085	10	10.814	16.74	9.673	26.732	29.46	23.958	23.891	19.846	16.136	54.129	25.696	24.244	14.662	24.581	13.667	23.895	37	34.634	59.239
291.429	17.549	20.582	16.158	54.714	39.255	13.5	22.587	22.625	9.019	13.022	13.717	26.964	29.238	7.123	10.81	11.75	32.954	23.968	31.969	34.245	9.956	9.368	11.306	14.401	11.135	23.505	12.577	11.293	15.385	9.705	10.705	18.24	8.85	27.482	30.54	23.482	23.203	20.817	15.829	51.257	33.196	24.425	13.303	25.034	13.347	22.842	37.215	34.317	59.67
293.333	16.624	20.255	15.902	44.986	39.614	12.361	20.957	21.562	9.87	14.109	14.465	26.829	32.822	7.667	10.857	11.278	30.494	23.674	30.07	33.971	10.637	8.221	12.059	13.737	11.087	22.168	12.07	11.693	15.915	10.089	9.915	17.885	8.327	29.018	30.76	22.369	26.398	21.837	14.563	51	41.598	24.189	13.007	25.103	12.694	20.726	37.49	35.293	55.477
295.238	16.301	20.617	16.632	35.614	39.6	12.632	22.87	20.854	9.769	15.478	13.424	28.559	32.03	8.544	10.905	10.646	24.218	23.863	31.155	33.829	10.791	8.007	12.765	13.713	11.154	21.937	12.197	12.7	15.138	10.393	9.729	18.323	8.953	29.312	29.22	22.81	35.148	22.827	13.508	46.911	38.99	24.134	15.186	26.521	13.181	21.747	35.899	41.915	52.636
297.143	15.514	21.702	18.947	30.486	38.931	13.958	25.652	22.323	9.398	13.348	14.242	30.55	29.376	8.184	11.143	10.368	28.805	23.242	34.24	34.906	10.264	8.838	13.6	14.899	11.337	22.137	12.437	12.779	13.969	9.616	11.403	17.427	9.869	28.143	28.26	23.738	35.453	28.173	13.553	45.941	31.892	23.811	16.138	25.718	15.528	21.958	36.383	43.146	50.511
299.048	15.809	21.596	25.519	30.114	37.917	14.153	24.283	22.646	10.019	11.609	16	30.081	26.455	7.693	11.905	10.125	32.414	23.316	35.163	35.363	10.462	8.522	14.176	14.656	11.625	22.442	13.07	12.407	13.877	9.286	12.388	16.646	9.589	27.179	29.66	23.107	28.609	35.125	13.915	52.723	28.667	23.094	14.71	24.282	16.861	19.547	36.886	37.537	49.773
300.952	16.566	21.014	37.481	29.043	36.455	13.715	23.63	23.167	10.315	12.13	15.343	26.658	24.04	8.939	10.619	9.917	28.966	23.053	34.984	34.718	11.132	8.522	12.471	13.943	10.923	22.379	13.127	11.564	14.508	9.866	11.953	17.698	9.972	28.455	29.24	22.393	24.492	39.971	14.894	53.396	28.745	22.339	13.579	24.983	14.347	17.421	37.074	35.537	51.136
302.857	15.335	20.433	38.459	26.314	35.903	13.528	22.717	24.052	9.991	11.957	14.202	26.964	22.733	8.807	12.524	9.528	27.207	22.505	35.705	33.637	11.176	8.574	11.424	13.903	10.019	21.368	13.324	12.593	14.762	9.366	11.651	16.698	10.112	28.741	30.98	21.482	20.781	37.413	15.246	50.733	30.422	22.898	12.876	25.897	12	17.8	36.154	38.622	49.898
304.762	13.422	20.667	29.827	24.614	38.966	13.396	20.935	23.01	9.528	13.565	15.859	30.423	21.743	8.246	14	9.472	26.816	22.979	36.853	34.404	10.692	9.199	11.765	13.514	10.298	22.358	13.155	13.164	15.908	9.607	11.047	16.969	9.766	27.214	33.5	23.202	20.211	30.519	14.663	49.05	30.608	23.598	13.972	25.179	12.514	18.811	34.463	38.866	49.284
306.667	12.942	20.674	24.323	23.5	42.924	13.049	21.63	22.177	10	13.891	16.03	30.748	21.772	7.395	13.429	9.653	25.333	21.989	38.527	36.318	9.912	9.971	12.024	13.138	11.221	22.632	12.451	12.6	15.115	9.491	10.217	18.25	10.093	25.696	32.92	23.536	20.648	27.779	14.638	48.535	29.225	22.764	16.593	26.376	13.611	17.579	35.47	46.073	46.886
308.571	13.676	21.078	22.06	24.186	42.455	12.799	22.652	22.854	10.102	12.935	15.121	26.622	20.257	7.061	13.286	10.271	22.966	22.137	40.45	36.029	9.978	9.412	12.459	12.757	11.394	21.663	13.817	12.129	14.354	9.5	10.209	17.854	9.888	26.625	33.72	23.268	19.766	27.154	15.216	50.851	25.186	22.52	14.71	28.556	13.139	17.463	38.51	49.805	46.273
310.476	14.526	20.688	20.06	24.229	41.524	12.708	21.609	23.615	9.741	14.826	14.909	24.261	18.495	7.57	13.714	9.285	20.299	22.884	40.791	35.735	9.802	8.868	12.941	13.19	11.221	23.032	14.972	10.843	15.192	9.536	10.326	17.583	9.327	30.286	33.9	25.458	20.828	24.923	15.035	56.079	20.941	22.803	13.193	27.068	11.444	17.842	40.611	39.829	49.227
312.381	15.035	21.582	17.323	23.157	37.793	12.389	23.717	23.385	10.778	14.848	14.354	22.523	18.95	8.368	16.095	9.354	25.103	22.042	41.155	36.151	9.231	8.507	13.2	13.883	11.163	23.453	13.563	12.393	15.146	8.482	10.039	18.938	8.617	31.67	34.12	26.113	21.844	23.481	14.789	59.485	20.735	22.906	15.234	25.974	11.181	16.874	39.732	35.463	48.511
314.286	15.983	21.631	17.617	23.814	34.607	13.562	24.826	24.042	10.648	12.804	14.768	21.694	21.089	9.289	22.81	10.243	29.218	22.884	42.876	36.882	10.385	9.096	13.494	14.178	12.471	22.505	12.577	13.486	15.731	8.929	10.155	18.281	9.327	30.982	38.48	28.411	20.961	20.885	15.161	58.693	20.304	23.591	15.214	26.359	11.611	17.726	38.772	34.524	46.5
316.19	15.162	19.922	17.85	22.986	35.545	14.208	20.87	24.604	10.38	13.174	14.626	22.739	23.901	8.956	28.381	10.153	25.724	22.505	45.419	36.004	10.978	9.801	13.824	14.158	11.865	22.011	12.408	12.021	15.415	10.196	11.062	17.927	8.897	31.714	44.82	29.006	21.359	18.644	15.764	56.089	18.235	23.331	13.924	25.581	12.431	17.358	38.383	37.268	46.955
318.095	14.185	19.78	17.752	22.886	37.993	13.576	21.891	23.271	10.352	14.913	14.747	24.811	27.673	8.167	26.905	10.201	24.69	21.379	50.729	36.359	10.154	9.875	13.694	13.984	10.788	22.389	13.803	11.5	15.262	9.429	10.721	18.5	8.645	28.768	47.74	27.631	21.383	16.971	21.503	57.277	17.461	23.118	13.89	25.256	12.361	17.147	38.215	40.256	46.557
320	15.156	20.617	16.97	22.5	39.131	13.618	23.326	23.281	9.731	14.478	15.242	28.928	28.218	8.412	25.667	9.528	26.713	21.811	52.465	38.176	10.352	9.735	13.612	14.219	11.529	22.874	15.324	12.307	15.454	8.679	10.535	18.833	10.29	27.554	53.12	26.399	21.32	15.615	35.754	60.416	18.471	24.26	14.931	25.427	11.569	18.663	38.913	41.646	47.25
[truncated: 210 more rows]
[truncated: 84 more columns]

## Sheet: Figure 1E&S1C 1mM Chronic 2
		Baseline
[truncated: 379 more rows]
[truncated: 82 more columns]

## Sheet: Figure 1E&S1C 1mM Chronic 3
		Baseline
[truncated: 379 more rows]
[truncated: 54 more columns]

## Sheet: Figure 1E&S1C 1uM Acute 1
	Baseline																																																Following dopamine exposure
[truncated: 379 more rows]
[truncated: 42 more columns]

## Sheet: Figure 1E&S1C 1uM Acute 2
		Baseline																																				Following dopamine exposure
[truncated: 379 more rows]
[truncated: 22 more columns]

## Sheet: Figure 1E&S1C 1uM Acute 3
	Baseline
[truncated: 379 more rows]
[truncated: 146 more columns]

[truncated: 7 more sheets: Figure 1E&S1C 1mM Acute 1, Figure 1E&S1C 1mM Acute 2, Figure 1E&S1C 1mM Acute 3, Figure 1E&S1C Control 1, Figure 1E&S1C Control 2, Figure 1E&S1C Control 3, Figure S1B]
