# Supplementary material for: Reactive Oxygen Species Mediate Transcriptional Responses to Dopamine and Cocaine in Human Cerebral Organoids
Source: Int J Mol Sci. 2023 Nov 18;24(22):16474. doi: 10.3390/ijms242216474 (PMC10671319; doi:10.3390/ijms242216474)
Supplement: Supplementary file 1 [file ijms-24-16474-s001.zip › Supplemental Excel File S2.xlsx]

## Sheet: Information
Supplemental Excel File 2
	Flourescence intensity measurements for Figures 1F, S1D, and 3B

## Sheet: Figure 1F&S1D
	Seconds	Acute Dopamine	Acute Dopamine	Acute Dopamine	Chronic Dopamine	Chronic Dopamine	Chronic Dopamine	Control	Control	Control
	0	14.439	29.441	13.235	11.407	29.733	8.925	23.684	23.362	65.275
	4	14.703	29.446	13.364	11.458	29.808	8.941	23.612	23.583	64.787
	8	14.935	29.367	13.397	11.448	29.914	8.963	23.525	23.592	64.419
	12	15.02	29.459	13.416	11.453	29.947	9.006	23.597	23.561	64.514
	16	15.083	29.583	13.456	11.45	29.901	9.034	23.994	23.539	64.554
	20	15.305	29.672	13.52	11.479	29.893	9.078	24.159	23.527	64.531
	24	15.319	29.586	13.634	11.537	29.854	9.095	24.224	23.596	64.59
	28	15.172	29.458	13.653	11.519	29.905	9.105	24.801	23.647	64.507
	32	15.182	29.388	13.526	11.483	30.056	9.095	25.096	23.68	64.471
	36	15.155	29.475	13.539	11.527	30.252	9.122	25.098	23.696	64.43
	40	15.215	29.679	13.672	11.62	30.217	9.192	25.186	23.74	64.397
	44	15.286	29.571	13.644	11.641	30.152	9.192	25.27	23.853	64.491
	48	15.25	29.275	13.706	11.689	30.227	9.197	25.564	23.959	64.588
	52	15.341	29.372	13.891	11.677	30.213	9.208	25.834	24.004	64.789
	56	15.412	29.571	13.918	11.666	30.263	9.225	25.951	24.024	64.963
	60	15.467	29.506	13.868	11.699	30.393	9.191	25.998	24.05	65.061
	64	15.561	29.476	13.883	11.733	30.471	9.139	26.003	24.031	65.05
	68	15.657	29.499	13.892	11.79	30.483	9.129	26.093	24.029	64.889
	72	15.655	29.602	13.814	11.689	30.481	9.129	26.216	24.09	64.751
	76	15.548	29.632	13.81	11.684	30.547	9.132	26.305	23.995	64.749
	80	15.655	29.585	13.769	11.801	30.613	9.119	26.27	23.933	64.747
	84	15.798	29.763	13.675	11.805	30.614	9.162	26.21	23.796	64.715
	88	15.839	29.738	13.757	11.809	30.54	9.21	26.192	23.613	64.726
	92	15.86	29.421	13.816	11.774	30.547	9.226	26.051	23.512	64.741
	96	15.821	29.47	13.811	11.776	30.576	9.274	25.968	23.404	64.871
	100	15.838	29.528	13.738	11.873	30.448	9.248	25.952	23.501	64.834
	104	15.756	29.498	13.742	11.944	30.463	9.244	25.898	23.588	64.774
	108	15.644	29.661	13.796	11.937	30.571	9.272	25.905	23.644	64.836
	112	15.652	29.71	13.812	11.937	30.616	9.249	25.841	23.812	64.858
	116	15.667	29.751	13.881	11.968	30.593	9.239	25.802	23.861	64.892
	120	15.663	29.794	13.781	11.953	30.543	9.244	26.01	23.854	64.886
	124	15.74	29.837	13.685	11.911	30.512	9.254	26.217	23.944	64.833
	128	15.794	29.796	14.204	11.913	30.478	9.261	26.339	23.993	64.872
	132	15.691	29.734	14.788	11.882	30.497	9.293	26.415	24.065	64.896
	136	15.574	29.796	14.897	11.808	30.631	9.33	26.612	24.206	64.832
	140	15.611	29.955	14.954	11.805	30.731	9.316	26.478	24.377	64.78
	144	15.785	30.013	15.059	11.775	30.75	9.297	26.24	24.512	64.826
	148	15.782	29.973	15.111	11.756	30.845	9.304	26.365	24.645	64.796
	152	15.737	29.954	15.052	11.787	30.89	9.286	26.422	24.699	64.778
	156	15.757	29.912	14.974	11.812	30.856	9.326	26.366	24.742	64.844
	160	15.754	29.959	15.079	11.815	30.825	9.328	26.273	24.74	64.81
	164	15.744	29.947	15.158	11.743	30.803	9.301	26.435	24.719	64.761
	168	15.707	29.934	15.094	11.738	30.808	9.356	26.568	24.819	64.712
	172	15.771	30.007	15.146	11.831	30.809	9.386	26.517	24.888	64.763
	176	15.823	30.037	15.212	11.845	30.677	9.415	26.436	24.991	64.845
	180	15.807	29.879	15.177	11.873	30.58	9.418	26.384	25.101	64.851
	184	15.743	29.765	15.129	11.918	30.717	9.369	26.477	25.198	64.782
	188	15.606	29.928	15.18	11.887	30.871	9.355	26.526	25.227	64.678
	192	15.613	30.01	15.176	11.85	30.81	9.385	26.641	25.281	64.603
	196	15.615	30.055	15.167	11.842	30.736	9.386	26.579	25.343	64.725
	200	15.592	30.159	15.148	11.839	30.872	9.399	26.499	25.395	64.761
	204	15.617	30.086	15.111	11.902	30.923	9.409	26.514	25.497	64.614
	208	15.676	30.008	15.213	11.968	30.89	9.419	26.397	25.608	64.624
	212	15.594	30.014	15.269	11.942	30.86	9.461	26.295	25.668	64.757
	216	15.457	29.943	15.178	11.953	30.942	9.465	26.282	25.74	64.78
	220	15.487	29.896	15.153	12	30.951	9.447	26.439	25.872	64.741
	224	15.493	29.984	15.167	12.008	30.815	9.397	26.629	25.868	64.695
	228	15.449	30.133	15.2	11.94	30.768	9.4	26.785	25.897	64.787
	232	15.35	30.09	15.254	11.876	30.87	9.467	26.855	25.839	65.765
	236	15.403	30.015	15.207	11.907	30.968	9.509	26.917	25.571	66.645
	240	15.55	30.227	15.24	11.984	31.014	9.46	27.059	25.392	66.673
	244	15.548	30.378	15.152	11.994	31.093	9.392	27.072	25.158	66.674
	248	15.485	30.247	14.979	11.968	31.06	9.439	26.975	25.007	66.598
	252	15.471	30.191	14.955	12	30.993	9.491	26.981	24.953	66.594
	256	15.518	30.228	15.1	12.03	31.078	9.444	27.098	24.86	66.585
	260	15.498	30.043	15.193	12.082	31.2	9.412	27.219	24.772	66.471
	264	15.381	29.917	15.067	12.103	31.241	9.434	27.146	24.676	66.393
	268	15.359	29.988	15.014	12.042	31.286	9.432	27.112	24.622	66.282
	272	15.387	29.96	15.018	12.079	31.237	9.413	27.059	24.607	66.23
	276	15.37	29.918	15.088	12.098	31.23	9.441	27.017	24.63	66.24
	280	15.296	29.941	15.22	12.182	31.155	9.463	26.951	24.587	66.227
	284	15.244	29.955	15.22	12.201	31.171	9.445	26.823	24.565	66.18
	288	15.24	30.04	15.16	12.032	31.262	9.432	26.846	24.564	66.149
	292	15.167	30.187	15.111	11.964	31.211	9.429	26.911	24.59	66.096
	296	15.251	30.272	15.142	11.96	31.081	9.426	26.894	24.61	66.146
	300	15.327	30.236	15.211	11.983	30.927	9.404	26.713	24.626	65.857
	304	15.251	30.178	15.267	12.054	30.919	9.387	26.658	24.637	65.681
	308	15.329	30.165	15.175	12.034	30.992	9.329	26.704	24.556	65.74
	312	15.378	30.217	15.072	11.955	30.91	9.296	26.726	24.472	65.633
	316	15.375	30.304	15.012	12.008	30.794	9.328	26.899	24.428	65.661
	320	15.479	30.33	14.932	12.051	30.926	9.353	27.113	24.417	65.565
	324	15.405	30.339	14.904	11.939	31.009	9.39	27.115	24.507	65.481
	328	15.232	30.294	14.826	11.81	30.938	9.403	27.135	24.682	65.472
	332	15.24	30.311	14.856	11.788	30.84	9.367	27.142	24.778	65.463
	336	15.302	30.324	14.923	11.869	30.894	9.344	27.297	24.863	65.468
	340	15.308	30.301	14.815	11.956	31.023	9.354	27.424	24.887	65.597
	344	15.332	30.3	14.775	11.906	31.02	9.366	27.138	24.836	65.663
	348	15.311	30.319	14.757	11.814	30.894	9.41	27.002	24.804	65.522
	352	15.205	30.357	14.609	11.84	30.834	9.416	26.977	24.727	65.511
	356	15.196	30.482	14.487	11.927	30.933	9.405	26.806	24.715	65.542
	360	15.317	30.471	14.391	11.933	31.037	9.395	26.795	24.707	65.561
	364	15.391	30.269	14.396	11.844	31.019	9.386	27.028	24.683	65.58
	368	15.351	30.301	14.496	11.841	30.897	9.42	27.046	24.686	65.409
	372	15.241	30.336	14.603	11.9	30.828	9.412	26.829	24.629	65.279
	376	15.249	30.257	14.649	11.98	30.726	9.409	26.851	24.563	65.333
	380	15.29	30.169	14.73	12.039	30.752	9.397	26.898	24.594	65.413
	384	15.29	30.17	14.813	12.06	30.812	9.372	26.729	24.6	65.387
	388	15.338	30.092	14.752	12.087	30.848	9.351	26.677	24.566	65.268
	392	15.298	29.899	14.752	12.057	30.945	9.329	26.867	24.567	65.227
	396	15.294	29.67	14.741	12.016	30.942	9.32	27.081	24.512	65.106
	400	15.362	29.074	14.678	11.968	30.981	9.365	27.073	24.495	65.02
	404	15.293	28.21	14.749	11.966	30.957	9.352	26.849	24.575	65.28
	408	15.251	27.136	14.707	11.993	30.964	9.311	26.829	24.615	65.375
	412	15.313	25.688	14.614	12.038	31.152	9.36	26.86	24.659	65.257
	416	15.295	23.947	14.581	12.022	31.218	9.339	26.794	24.714	65.287
	420	15.34	22.129	14.624	12.033	31.171	9.353	26.762	24.68	65.369
	424	15.37	20.149	14.722	12.095	31.265	9.347	26.635	24.603	65.243
	428	15.299	18.295	14.713	12.058	31.305	9.294	26.625	24.551	65.104
	432	15.15	16.666	14.783	12.053	31.201	9.322	26.601	24.465	65.22
	436	15.104	14.966	14.908	12.142	31.158	9.315	26.662		65.288
	440	15.229	13.3	14.963	12.126	31.186	9.321	27.064		65.158
	444	15.177	11.779	14.811	12.148	31.11	9.359	27.141		65.23
	448	15.131	10.494	14.742	12.137	30.945	9.289	26.906		65.363
	452	15.171	9.412	14.787	11.996	30.992	9.252	26.859		65.311
	456	15.155	8.504	14.761	12.006	31.036	9.341	27.009		65.268
	460	15.204	7.696	14.864	12.123	31.083	9.375	27.063		65.138
	464	15.281	7.116	14.888	12.199	31.105	9.322	26.891		65.073
	468	15.161	6.748	14.792	12.21	31.133	9.327	26.951		64.956
	472	14.987	6.396	14.782	12.223	31.178	9.343	27.182		65.013
	476	15.036	6.136	14.768	12.204	31.13	9.285	27.219		65.124
	480	15.113	5.978	14.643	12.222	31.077	9.266	27.163		64.946
	484	14.946	5.896	14.515	12.287	31.009	9.255	27.111		64.893
	488	14.654	5.838	14.511	12.33	31.126	9.249	27.146		64.817
	492	14.548	5.724	14.522	12.266	31.279	9.293	27.031		64.804
	496	14.638	5.618	14.491	12.259	31.339	9.308	26.989		64.877
	500	14.649	5.56	14.516	12.299	31.328	9.265	27.15		64.793
	504	14.66	5.517	14.502	12.262	31.307	9.241	27.091		64.767
	508	14.756	5.556	14.531	12.221	31.313	9.268	27.079		64.761
	512	14.827	5.603	14.486	12.101	31.211	9.25	27.118		64.753
	516	14.882	5.64	14.469	12.087	31.105	9.196	27.105		64.681
	520	14.816	5.737	14.613	12.128	31.067	9.201	27.145		64.643
	524	14.68	5.858	14.523	11.963	31.195	9.194	27.118		64.705
	528	14.548	5.919	14.318	11.951	31.233	9.212	27.125		64.628
	532	14.403	5.884	14.375	12.067	31.083	9.249	27.212		64.501
	536	14.265	5.934	14.475	12.054	31.084	9.194	27.189		64.476
	540	14.088	6.043	14.351	12.054	31.017	9.162	27.097		64.568
	544	13.897	6.097	14.282	12.108	31.038	9.215	27.145		64.547
	548	13.811	6.228	14.218	12.107	31.174	9.214	27.196		64.413
	552	13.727	6.382	14.186	12.067	31.089	9.166	27.199		64.306
	556	13.603	6.393	14.314	12.056	31.008	9.214	27.11		64.282
	560	13.48	6.369	14.314	12.079	31.106	9.23	27.021		64.197
	564	13.248	6.414	14.189	12.14	31.075	9.208	27.204		64.107
	568	13.087	6.53	14.08	12.132	30.903	9.215	27.411		64.093
	572	13.016	6.627	13.982	12.094	30.817	9.2	27.385		64.005
	576	12.897	6.677	14.021	12.113	30.893	9.179	27.206		63.854
	580	12.759	6.812	14.166	12.12	30.783	9.178	27.249		63.873
	584	12.516	6.989	14.288	12.107	30.58	9.198	27.336		64.002
	588	12.396	7.064	14.316	12.147	30.566	9.216	27.445		63.994
	592	12.431	7.072	14.284	12.153	30.539	9.256	27.525		63.993
	596	12.293	7.176	14.264	12.189	30.615	9.295	27.477		63.994
	600	12.07	7.28	14.287	12.212	30.484	9.307	27.395		64.021
	604	12.064	7.307	14.214	12.2	30.277	9.303	27.404		63.904
	608	12.115	7.378	14.161	12.181	30.161	9.255	27.58		63.716
	612	11.997	7.448	14.179	12.167	30.025	9.214	27.635		63.708
	616	11.916	7.499	14.154	12.144	29.976	9.236	27.589		63.723
	620	11.869	7.559	14.153	12.159	29.777	9.23	27.561		63.718
	624	11.811	7.578	14.061	12.126	29.499	9.224	27.546		63.737
	628	11.732	7.631	13.99	11.951	29.307	9.256	27.514		63.717
	632	11.573	7.697	14.058	11.935	29.155	9.245	27.581		63.573
	636	11.52	7.768	14.17	11.997	28.87	9.242	27.654		63.352
	640	11.454	7.812	14.145	12.041	28.5	9.267	27.61		63.312
	644	11.325	7.784	14.002	12.104	28.324	9.253	27.576		63.327
	648	11.26	7.82	13.852	12.145	28.154	9.224	27.443		63.225
	652	11.142	7.901	13.789	12.09	27.916	9.247	27.297		63.148
	656	10.984	7.982	13.854	12.017	27.774	9.31	27.331		63.081
	660	10.855	8.042	13.868	12.005	27.477	9.285	27.38		62.977
	664	10.823	8.061	13.771	12.024	27.171	9.195	27.295		63.252
	668	10.785	8.137	13.804	12.046	26.91	9.16	27.412		64.08
	672	10.699	8.247	13.788	12.098	26.562	9.194	27.442		64.569
	676	10.62	8.271	13.715	12.032	26.183	9.228	27.24		64.579
	680	10.44	8.21	13.803	11.944	25.767	9.247	27.322		64.424
	684	10.172	8.164	13.817	11.95	25.357	9.251	27.351		64.27
	688	10.083	8.161	13.816	11.913	25.027	9.22	27.347		64.185
	692	10.023	8.112	13.786	11.89	24.468	9.243	27.432		64.247
	696	9.79	8.163	13.661	11.962	23.807	9.255	27.469		64.483
	700	9.646	8.19	13.665	12.01	23.449	9.202	27.467		64.386
	704	9.511	8.133	13.682	11.975	22.996	9.174	27.493		64.088
	708	9.442	8.154	13.613	11.984	22.406	9.197	27.528		64.12
	712	9.393	8.124	13.474	12.001	21.913	9.216	27.43		64.281
	716	9.199	8.031	13.337	11.976	21.451	9.2	27.408		64.256
	720	9.021	7.919	13.206	12.03	20.939	9.137	27.484		64.187
	724	8.78	7.855	13.142	12.017	20.417	9.123	27.462		64.212
	728	8.568	7.811	13.175	11.892	19.858	9.195	27.317		64.163
	732	8.396	7.758	13.119	11.793	19.371	9.207	27.258		64.047
	736	8.188	7.694	13.124	11.684	19.01	9.176	27.375		64.094
	740	8.069	7.566	13.164	11.654	18.617	9.158	27.53		64.153
	744	7.902	7.375	13.054	11.712	18.256	9.163	27.547		64.115
	748	7.677	7.183	12.761	11.729	18.007	9.141	27.416		64.018
	752	7.503	7.016	12.51	11.715	17.738	9.119	27.342		63.84
	756	7.313	6.811	12.392	11.728	17.399	9.149	27.276		63.735
	760	7.03	6.646	12.348	11.668	17.063	9.142	27.215		63.824
	764	6.745	6.51	12.234	11.555	16.814	9.112	27.32		63.86
	768	6.526	6.302	12.039	11.497	16.641	9.105	27.397		63.771
	772	6.316	6.093	11.746	11.526	16.377	9.034	27.154		63.704
	776	6.039	5.939	11.433	11.575	16.159	8.939	27.081		63.602
	780	5.783	5.747	11.311	11.552	16.016	8.881	27.237		63.452
	784	5.55	5.599	11.122	11.572	15.823	8.81	27.226		63.37
	788	5.277	5.457	10.885	11.508	15.677	8.711	27.18		63.413
	792	5.024	5.267	10.763	11.336	15.507	8.641	27.217		63.437
	796	4.878	5.131	10.573	11.263	15.297	8.554	27.362		63.37
	800	4.756	4.977	10.339	11.223	15.166	8.397	27.46		63.425
	804	4.549	4.82	10.182	11.159	15.01	8.279	27.294		63.521
	808	4.375	4.674	10.011	10.971	14.859	8.197	27.092		63.425
	812	4.243	4.528	9.688	10.771	14.701	8.093	27.108		63.277
	816	4.068	4.426	9.279	10.668	14.52	7.959	27.305		63.322
	820	3.875	4.348	8.962	10.561	14.465	7.845	27.328		63.345
	824	3.714	4.207	8.777	10.385	14.414	7.72	27.229		63.311
	828	3.615	4.064	8.634	10.148	14.333	7.597	27.421		63.371
	832	3.517	3.973	8.404	9.956	14.192	7.475	27.489		63.326
	836	3.408	3.879	8.11	9.82	14.007	7.348	27.373		63.316
	840	3.315	3.813	7.82	9.665	13.853	7.23	27.248		63.237
	844	3.217	3.755	7.627	9.443	13.734	7.095	27.19		63.15
	848	3.118	3.659	7.423	9.146	13.67	6.96	27.32		63.099
	852	3.038	3.585	7.15	8.828	13.617	6.867	27.46		63.043
	856	2.991	3.565	6.928	8.573	13.55	6.805	27.52		62.905
	860	2.935	3.509	6.755	8.32	13.451	6.701	27.442		62.949
	864	2.875	3.453	6.569	7.983	13.464	6.61	27.265		63.088
	868	2.85	3.458	6.435	7.679	13.504	6.557	27.231		62.991
	872	2.802	3.414	6.348	7.423	13.418	6.477	27.318		62.836
	876	2.749	3.356	6.214	7.179	13.371	6.404	27.189		62.742
	880	2.73	3.323	6.108	6.947	13.273	6.354	26.981		62.742
	884	2.693	3.283	6.01	6.711	13.165	6.251	26.928		62.609
	888	2.672	3.274	5.872	6.523	12.975	6.158	26.881		62.562
	892	2.619	3.274	5.797	6.298	12.82	6.112	26.841		62.58
	896	2.555	3.242	5.706	6.037	12.812	6.047	26.778		62.468
	900	2.546	3.192	5.62	5.802	12.711	5.972	26.922		62.351
	904	2.555	3.186	5.541	5.649	12.611	5.955	27.16		62.248
	908	2.533	3.195	5.398	5.503	12.544	5.958	27.173		62.079
	912	2.55	3.17	5.342	5.3	12.535	5.91	27.242		62.013
	916	2.562	3.164	5.257	5.133	12.559	5.849	27.238		62.125
	920	2.518	3.146	5.139	4.967	12.516	5.814	27.071		62.092
	924	2.504	3.04	5.097	4.862	12.483	5.839	27.052		61.972
	928	2.495	2.979	5.038	4.777	12.494	5.839	27.181		61.962
	932	2.489	2.976	4.94	4.691	12.43	5.8	27.196		61.912
	936	2.486	2.951	4.868	4.604	12.35	5.784	27.156		61.872
	940	2.473	2.939	4.808	4.509	12.312	5.808	27.171		61.832
	944	2.472	2.966	4.739	4.432	12.295	5.82	27.195		61.901
	948	2.456	2.967	4.654	4.328	12.33	5.777	27.231		61.864
	952	2.413	2.957	4.603	4.267	12.256	5.782	27.223		61.665
	956	2.414	2.977	4.581	4.294	12.202	5.808	27.184		61.664
	960	2.424	2.969	4.495	4.225	12.249	5.781	27.196		61.627
	964	2.417	2.936	4.431	4.126	12.254	5.755	27.235		61.575
	968	2.399	2.91	4.396	4.078	12.28	5.768	27.172		61.493
	972	2.39	2.858	4.343	4.014	12.257	5.782	27.154		61.504
	976	2.416	2.842	4.29	4.018	12.172	5.757	27.337		61.561
	980	2.431	2.856	4.242	4.03	12.155	5.728	27.507		61.463
	984	2.476	2.833	4.197	3.999	12.15	5.729	27.484		61.346
	988	2.49	2.833	4.207	3.993	12.168	5.708	27.323		61.171
	992	2.433	2.819	4.207	3.999	12.19	5.719	27.163		61.019
	996	2.399	2.803	4.167	3.955	12.072	5.735	27.136		60.997
	1000	2.384	2.8	4.188	3.887	11.977	5.727	27.157		61.008
	1004	2.401	2.778	4.199	3.88	11.953	5.746	27.118		60.978
	1008	2.405	2.781	4.112	3.912	11.945	5.734	27.203		60.969
	1012	2.395	2.781	4.074	3.894	11.951	5.713	27.154		60.85
	1016	2.402	2.761	4.092	3.845	11.962	5.733	26.988		60.849
	1020	2.382	2.78	4.062	3.804	12.015	5.722	27.24		60.757
	1024	2.375	2.786	3.998	3.771	12.065	5.694	27.39		60.5
	1028	2.416	2.771	3.971	3.766	12.048	5.727	27.191		60.38
	1032		2.771	3.93	3.753	11.972	5.724	27.036		60.359
	1036		2.769	3.874	3.736	11.971	5.681	27.108		60.377
	1040		2.741	3.854	3.725	11.946	5.707	27.129		60.304
	1044		2.72	3.861	3.716	11.901	5.695	27.033		60.247
	1048		2.707	3.887	3.725	11.911	5.66	27.331		60.338
	1052		2.717	3.915	3.704	11.876	5.694	27.371		60.358
	1056		2.758	3.954	3.692	11.872	5.723	27.222		60.163
	1060		2.766	3.929	3.668	11.87	5.723	27.323		60.037
	1064		2.754	3.855	3.664	11.792	5.745	27.431		60.104
	1068			3.833	3.677	11.785	5.751	27.53		60.097
	1072			3.827	3.649	11.798	5.71	27.456		59.936
	1076			3.792	3.637	11.776	5.701	27.359		59.818
	1080			3.726	3.623	11.729	5.713	27.335		59.733
	1084			3.692	3.607	11.784	5.701	27.348		59.817
	1088			3.693	3.6	11.878	5.704	27.381		59.9
	1092			3.694	3.562	11.819	5.696	27.285		59.69
	1096			3.707	3.553	11.758	5.685	27.173		59.532
	1100			3.658	3.556	11.802	5.671	27.101		59.398
	1104			3.652	3.56	11.879	5.62	27.019		59.359
	1108			3.711	3.591	11.88	5.635	27.183		59.352
	1112			3.705	3.642	11.815	5.676	27.364		59.154
	1116			3.702	3.668	11.782	5.685	27.342		59.171
	1120			3.702	3.628	11.78	5.707	27.272		59.14
	1124			3.689	3.6	11.82	5.706	27.266		58.95
	1128			3.691	3.608	11.877	5.667	27.326		58.929
	1132			3.707	3.632	11.843	5.635	27.135		58.776
	1136			3.724	3.645	11.812	5.64	27.024		58.549
	1140			3.701	3.662	11.799	5.657	27.03		58.479
	1144			3.674	3.712	11.844	5.661	27.057		59.125
	1148			3.678	3.722	11.87	5.663	27.082		59.772
	1152			3.669	3.686		5.665	27.112		59.674
	1156			3.651	3.68		5.666	27.331		59.64
	1160			3.655	3.696		5.701	27.45		59.68
	1164			3.614	3.718		5.733	27.431		59.635
	1168			3.596	3.698		5.727	27.364		59.572
	1172			3.573	3.69		5.711	27.513		59.523
	1176			3.534	3.706		5.704	27.532		59.32
	1180			3.547	3.717		5.684	27.422		59.201
	1184			3.581	3.731		5.659	27.418		59.191
	1188			3.59	3.74		5.675	27.543		59.162
	1192			3.569	3.764		5.696	27.6		59.166
	1196			3.582	3.771		5.695	27.398		59.006
	1200			3.553	3.771		5.693	27.341		58.852
	1204			3.534			5.705	27.301		58.88
	1208			3.547			5.666	27.152		58.869
	1212			3.569			5.655	27.098		58.814
	1216			3.579			5.669	27.261		58.867
	1220			3.56			5.64	27.308		58.848
	1224			3.589			5.625	27.226		58.643
	1228			3.601				27.307		58.602
	1232			3.568				27.463		58.686
	1236			3.547				27.65		58.503
	1240			3.542				27.711		58.302
	1244			3.541				27.587		58.236
	1248			3.559				27.546		58.099
	1252			3.525				27.529		57.866
	1256			3.486				27.447		57.645
	1260			3.529				27.404		57.621
	1264			3.558				27.304		57.774
	1268			3.558				27.176		57.678
	1272			3.537				27.167		57.541
	1276			3.546				27.389		57.565
	1280			3.518				27.552		57.563
	1284			3.457				27.524		57.482
	1288			3.471				27.49		57.573
	1292			3.484				27.453		57.645
	1296			3.491				27.535		57.586
	1300			3.478				27.548		57.58
	1304			3.481				27.486		57.477
	1308			3.478				27.644		57.372
	1312			3.462				27.747		57.243
	1316			3.474				27.697		57.126
	1320			3.481				27.616		57.127
	1324			3.486				27.499		57.235
	1328			3.484				27.541		57.221
	1332			3.483				27.554		57.175
	1336			3.489				27.405		57.177
	1340			3.506				27.29		57.119
	1344			3.497				27.265		56.974
	1348			3.469	6.606			27.228		56.864
	1352			3.439	6.576			27.074		56.829
	1356			3.399	6.577			27.222		56.824
	1360			3.374	6.59			27.469		56.771
	1364			3.406	6.609			27.362		56.562
	1368			3.452	6.592			27.298		56.383
	1372			3.461	6.537			27.346		56.403
	1376			3.444	6.538			27.292		56.459
	1380			3.406	6.591			27.241		56.428
	1384			3.386	6.6			27.313		56.367
	1388			3.36	6.576			27.296		56.372
	1392			3.337	6.574			27.22		56.504
	1396			3.35	6.57			27.324		56.528
	1400			3.375	6.583			27.303		56.394
	1404			3.409	6.593			27.12		56.375
	1408			3.444	6.601			27.099		56.232
	1412			3.463	6.591			27.291		56.085
	1416			3.479	6.589			27.358		56.077
	1420			3.5	6.621			27.412		55.873
	1424			3.472	6.628			27.431		55.694
	1428			3.431	6.599			27.296		55.678
	1432			3.426	6.569			27.301		55.635
	1436			3.426	6.602			27.354		55.695
	1440			3.414	6.607			27.399		55.854
	1444			3.387	6.572			27.315		55.816
	1448			3.365	6.579			27.351		55.697
	1452			3.324	6.586			27.506		55.582
	1456			3.346	6.568			27.528		55.453
	1460			3.4	6.565			27.621		55.68
	1464			3.417	6.599			27.712		55.813
	1468			3.452	6.624			27.619		55.511
	1472			3.465	6.619			27.401		55.166
	1476			3.456	6.6			27.363		54.884
	1480			3.442	6.606			27.408		54.796
	1484			3.444	6.623			27.475		54.755
	1488			3.426	6.61			27.533		54.804
	1492			3.398	6.626			27.64		54.987
	1496			3.42	6.641			27.786		55.111
	1500			3.422	6.6			27.632		54.991
	1504			3.436	6.598			27.452		54.858
	1508			3.404	6.596			27.593		54.767
	1512			3.325	6.587			27.87		54.625
	1516			3.328	6.604			27.89		54.569
	1520			3.345	6.583			27.771		54.444
	1524			3.333	6.541			27.762		54.384
	1528			3.35	6.542			27.793		54.407
	1532			3.348	6.554			27.56		54.344
	1536			3.33	6.527			27.38		54.352
	1540			3.35	6.535			27.389		54.207
	1544			3.347	6.545			27.371		53.997
	1548			3.334	6.513			27.391		53.863
	1552			3.329	6.527			27.445		53.729
	1556			3.357	6.512			27.653		53.522
	1560			3.378	6.477			27.595		53.35
	1564			3.366	6.502			27.518		53.497
	1568			3.356	6.516			27.613		53.626
	1572			3.354	6.507			27.587		53.544
	1576			3.349	6.506			27.679		53.382
	1580			3.325	6.506			27.718		53.379
	1584			3.336	6.487			27.59		53.305
	1588			3.307	6.444			27.615		53.195
	1592			3.231	6.384			27.649		53.366
	1596			3.216	6.36			27.52		53.374
	1600				6.375			27.508		53.14
	1604				6.401			27.584		52.955
	1608				6.418			27.57		52.781
	1612				6.4			27.496		52.672
	1616				6.374			27.54		52.431
	1620				6.388			27.408		52.233
	1624				6.383			27.275		52.182
	1628				6.384			27.462		52.226
	1632				6.403			27.497		52.346
	1636				6.376			27.428		52.167
	1640				6.33			27.29		51.947
	1644				6.303			27.145		51.843
	1648				6.303			27.151		51.547
	1652				6.306			27.165		51.32
	1656				6.329			27.303		51.414
	1660				6.329			27.212		51.394
	1664				6.341			27.094		51.177
	1668				6.319			27.142		51.19
	1672				6.285			27.046		51.349
	1676				6.292			27.151		51.263
	1680				6.291			27.184		51.114
	1684				6.291			27.186		51.042
	1688				6.275			27.313		51.148
	1692				6.26			27.376		51.224
	1696				6.273			27.316		51.039
	1700				6.262			27.261		50.888
	1704				6.248			27.247		50.746
	1708				6.236			27.319		50.608
	1712				6.233			27.538		50.563
	1716				6.269			27.6		50.586
	1720				6.261			27.484		50.696
	1724				6.227			27.308		50.735
	1728				6.247			27.134		50.664
	1732				6.267			27.072		50.732
	1736				6.257			27.192		50.664
	1740				6.274			27.366		50.582
	1744				6.28			27.446		50.565
	1748				6.266			27.402		50.966
	1752				6.227			27.394		51.415
	1756				6.208			27.487		51.578
	1760				6.197			27.446		51.713
	1764				6.177			27.416		51.505
	1768				6.191			27.444		51.276
	1772				6.213			27.383		51.165
	1776				6.213			27.256		51.289
	1780				6.207			27.392		51.389
	1784				6.181			27.488		51.257
	1788				6.134			27.349		51.118
	1792				6.144			27.359		51.015
	1796				6.185			27.512		50.991
	1800
	1804
	1808
	1812
	1816
	1820
	1824
	1828
	1832
	1836
	1840
	1844
	1848
	1852
	1856
	1860
	1864
	1868
	1872
	1876
	1880
	1884
	1888
	1892
	1896
	1900
	1904
	1908
	1912
	1916
	1920
	1924
	1928
	1932
	1936
	1940
	1944
	1948
	1952
	1956
	1960
	1964
	1968
	1972
	1976
	1980
	1984
	1988
	1992
	1996
	2000
	2004
	2008
	2012
	2016
	2020
	2024
	2028
	2032
	2036
	2040
	2044
	2048
	2052
	2056
	2060
	2064
	2068
	2072
	2076
	2080
	2084
	2088
	2092
	2096
	2100
	2104
	2108
	2112
	2116
	2120
	2124
	2128
	2132
	2136
	2140
	2144
	2148
	2152
	2156
	2160
	2164
	2168
	2172
	2176
	2180
	2184
	2188
	2192
	2196
	2200
	2204
	2208
	2212
	2216
	2220
	2224
	2228
	2232
	2236
	2240
	2244
	2248
	2252
	2256
	2260
	2264
	2268
	2272
	2276
	2280
	2284
	2288
	2292
	2296
	2300
	2304
	2308
	2312
	2316
	2320
	2324
	2328
	2332
	2336
	2340
	2344
	2348
	2352
	2356
	2360
	2364
	2368
	2372
	2376
	2380
	2384
	2388
	2392
	2396
	2400
	2404
	2408
	2412
	2416
	2420
	2424
	2428
	2432
	2436
	2440
	2444
	2448
	2452
	2456
	2460
	2464
	2468
	2472
	2476
	2480
	2484
	2488
	2492
	2496
	2500
	2504
	2508
	2512
	2516
	2520
	2524
	2528
	2532
	2536
	2540
	2544
	2548
	2552
	2556
	2560
	2564
	2568
	2572
	2576
	2580
	2584
	2588
	2592
	2596
	2600
	2604
	2608
	2612
	2616
	2620
	2624
	2628
	2632
	2636
	2640
	2644
	2648
	2652
	2656
	2660
	2664
	2668
	2672
	2676
	2680
	2684
	2688
	2692
	2696
	2700
	2704
	2708
	2712
	2716
	2720
	2724
	2728
	2732
	2736
	2740
	2744
	2748
	2752
	2756
	2760
	2764
	2768
	2772
	2776
	2780
	2784
	2788
	2792
	2796
	2800
	2804
	2808
	2812
	2816
	2820
	2824
	2828
	2832
	2836
	2840
	2844
	2848
	2852
	2856
	2860
	2864
	2868
	2872
	2876
	2880
	2884
	2888
	2892
	2896
	2900
	2904
	2908
	2912
	2916
	2920
	2924
	2928
	2932
	2936
	2940
	2944
	2948
	2952
	2956
	2960
	2964
	2968
	2972
	2976
	2980
	2984
	2988
	2992
	2996
	3000
	3004
	3008
	3012
	3016
	3020
	3024
	3028
	3032
	3036
	3040
	3044
	3048
	3052
	3056
	3060
	3064
	3068
	3072
	3076
	3080
	3084
	3088
	3092
	3096
	3100
	3104
	3108
	3112
	3116
	3120
	3124
	3128
	3132
	3136
	3140
	3144
	3148
	3152
	3156
	3160
	3164
	3168
	3172
	3176
	3180
	3184
	3188
	3192
	3196
	3200
	3204
	3208
	3212
	3216
	3220
	3224
	3228
	3232
	3236
	3240
	3244
	3248
	3252
	3256
	3260
	3264
	3268
	3272
	3276
	3280
	3284
	3288
	3292
	3296
	3300
	3304
	3308
	3312
	3316
	3320
	3324
	3328
	3332
	3336
	3340
	3344
	3348
	3352
	3356
	3360
	3364
	3368
	3372
	3376
	3380
	3384
	3388
	3392
	3396
	3400
	3404
	3408
	3412
	3416
	3420
	3424
	3428
	3432
	3436
	3440
	3444
	3448
	3452
	3456
	3460
	3464
	3468
	3472
	3476
	3480
	3484
	3488
	3492
	3496
	3500
	3504
	3508
	3512
	3516
	3520
	3524
	3528
	3532
	3536
	3540
	3544

## Sheet: Figure 1F&S1D (2)
	Seconds	Acute Dopamine	Acute Dopamine	Acute Dopamine	Chronic Dopamine	Chronic Dopamine	Chronic Dopamine	Control	Control	Control	Seconds	Acute Dopamine	Acute Dopamine	Acute Dopamine	Chronic Dopamine	Chronic Dopamine	Chronic Dopamine	Control	Control	Control	Seconds	Acute	Chronic	Control	Acute	Chronic	Control	Acute	Chronic	Control
	0	14.439	29.441	13.235	11.407	29.733	8.925	23.684	23.362	65.275	0	0	0	0	0	0	0	0	0	0	0	0	0	0	0	0	0	#NUM!	#NUM!	#NUM!
	4	14.703	29.446	13.364	11.458	29.808	8.941	23.612	23.583	64.787	4	0.0182838	0.000169831	0.00974688	0.00447094	0.00252245	0.00179272	-0.00304003	0.00945981	-0.00747606	4	0.00940018	0.0029287	-0.000352094	0.00739907	0.00113049	0.00717053	0.00837268	0.00127924	0.00811406
	8	14.935	29.367	13.397	11.448	29.914	8.963	23.525	23.592	64.419	8	0.0343514	-0.0025135	0.0122403	0.00359428	0.00608751	0.0042577	-0.00671339	0.00984505	-0.0131137	8	0.0146927	0.0046465	-0.00332737	0.0151496	0.00105433	0.00967386	0.0171431	0.00119307	0.0109468
	12	15.02	29.459	13.416	11.453	29.947	9.006	23.597	23.561	64.514	12	0.0402382	0.000611392	0.0136759	0.00403261	0.00719739	0.00907563	-0.00367337	0.00851811	-0.0116584	12	0.0181752	0.00676854	-0.00227121	0.0164875	0.00208102	0.00829647	0.018657	0.00235485	0.00938816
	16	15.083	29.583	13.456	11.45	29.901	9.034	23.994	23.539	64.554	16	0.0446014	0.00482321	0.0166981	0.00376962	0.00565029	0.0122129	0.013089	0.00757641	-0.0110456	16	0.0220409	0.00721093	0.00320661	0.016673	0.00361929	0.010326	0.018867	0.00409554	0.0116848
	20	15.305	29.672	13.52	11.479	29.893	9.078	24.159	23.527	64.531	20	0.0599765	0.0078462	0.0215338	0.00631191	0.00538123	0.0171429	0.0200557	0.00706275	-0.0113979	20	0.0297855	0.009612	0.00524018	0.0220674	0.00533866	0.0129054	0.0249712	0.00604115	0.0146036
	24	15.319	29.586	13.634	11.537	29.854	9.095	24.224	23.596	64.59	24	0.060946	0.0049251	0.0301473	0.0113965	0.00406955	0.0190476	0.0228002	0.0100163	-0.0104941	24	0.0320062	0.0115046	0.0074408	0.0229082	0.00611525	0.0137138	0.0259226	0.00691993	0.0155183
	28	15.172	29.458	13.653	11.519	29.905	9.105	24.801	23.647	64.507	28	0.0507653	0.000577426	0.0315829	0.00981853	0.00578482	0.0201681	0.0471626	0.0121993	-0.0117656	28	0.0276419	0.0119238	0.0158654	0.0206778	0.0060577	0.0241966	0.0233987	0.00685481	0.0273806
	32	15.182	29.388	13.526	11.483	30.056	9.095	25.096	23.68	64.471	32	0.0514579	-0.00180021	0.0219872	0.00666258	0.0108634	0.0190476	0.0596183	0.0136118	-0.0123171	32	0.0238816	0.0121912	0.0203043	0.0217837	0.00514261	0.0297464	0.0246502	0.00581931	0.0336606
	36	15.155	29.475	13.539	11.527	30.252	9.122	25.098	23.696	64.43	36	0.0495879	0.00115485	0.0229694	0.0105199	0.0174554	0.0220728	0.0597028	0.0142967	-0.0129452	36	0.0245707	0.0166827	0.0203514	0.0198051	0.00474802	0.0299658	0.0224112	0.00537279	0.0339089
	40	15.215	29.679	13.672	11.62	30.217	9.192	25.186	23.74	64.397	40	0.0537433	0.00808396	0.0330185	0.0186727	0.0162782	0.029916	0.0634183	0.0161801	-0.0134508	40	0.0316153	0.0216223	0.0220492	0.0186667	0.00594542	0.0316549	0.021123	0.00672775	0.0358203
	44	15.286	29.571	13.644	11.641	30.152	9.192	25.27	23.853	64.491	44	0.0586606	0.00441561	0.0309029	0.0205137	0.0140921	0.029916	0.066965	0.021017	-0.0120107	44	0.0313264	0.0215073	0.0253238	0.0221474	0.00649816	0.0323852	0.0250617	0.00735323	0.0366467
	48	15.25	29.275	13.706	11.689	30.227	9.197	25.564	23.959	64.588	48	0.0561673	-0.0056384	0.0355875	0.0247217	0.0166145	0.0304762	0.0793785	0.0255543	-0.0105247	48	0.0287055	0.0239375	0.0314694	0.0256971	0.0056861	0.0369404	0.0290784	0.00643431	0.0418012
	52	15.341	29.372	13.891	11.677	30.213	9.208	25.834	24.004	64.789	52	0.0624697	-0.00234367	0.0495655	0.0236697	0.0161437	0.0317087	0.0907786	0.0274805	-0.00744542	52	0.0365639	0.0238407	0.0369379	0.0280116	0.00635554	0.0406536	0.0316975	0.00719183	0.046003
	56	15.412	29.571	13.918	11.666	30.263	9.225	25.951	24.024	64.963	56	0.0673869	0.00441561	0.0516056	0.0227054	0.0178253	0.0336134	0.0957186	0.0283366	-0.00477978	56	0.041136	0.0247147	0.0397585	0.0267526	0.00660022	0.0418157	0.0302729	0.00746872	0.047318
	60	15.467	29.506	13.868	11.699	30.393	9.191	25.998	24.05	65.061	60	0.0711961	0.00220781	0.0478277	0.0255983	0.0221976	0.0298039	0.0977031	0.0294495	-0.00327844	60	0.0404105	0.0258666	0.0412914	0.0286485	0.00311107	0.0420673	0.0324183	0.00352045	0.0476028
	64	15.561	29.476	13.883	11.733	30.471	9.139	26.003	24.031	65.05	64	0.0777062	0.00118882	0.0489611	0.0285789	0.0248209	0.0239776	0.0979142	0.0286362	-0.00344696	64	0.0426187	0.0257925	0.0410345	0.0315584	0.00200018	0.042299	0.035711	0.00226337	0.0478649
	68	15.657	29.499	13.892	11.79	30.483	9.129	26.093	24.029	64.889	68	0.0843549	0.00197004	0.0496411	0.0335759	0.0252245	0.0228571	0.101714	0.0285506	-0.00591344	68	0.045322	0.0272192	0.0414505	0.0337718	0.0045976	0.0448756	0.0382157	0.00520257	0.0507806
	72	15.655	29.602	13.814	11.689	30.481	9.129	26.216	24.09	64.751	72	0.0842164	0.00546856	0.0437476	0.0247217	0.0251572	0.0228571	0.106908	0.0311617	-0.00802758	72	0.0444775	0.0242453	0.0433473	0.0321528	0.000997584	0.0477067	0.0363836	0.00112885	0.0539842
	76	15.548	29.632	13.81	11.684	30.547	9.132	26.305	23.995	64.749	76	0.0768059	0.00648755	0.0434454	0.0242833	0.027377	0.0231933	0.110665	0.0270953	-0.00805822	76	0.0422463	0.0249512	0.0432342	0.0287199	0.00177208	0.0497941	0.032499	0.00200526	0.0563463
	80	15.655	29.585	13.769	11.801	30.613	9.119	26.27	23.933	64.747	80	0.0842164	0.00489114	0.0403476	0.0345402	0.0295967	0.0217367	0.109188	0.0244414	-0.00808885	80	0.0431517	0.0286245	0.0418467	0.032445	0.00527202	0.0494345	0.0367143	0.00596574	0.0559394
	84	15.798	29.763	13.675	11.805	30.614	9.162	26.21	23.796	64.715	84	0.0941201	0.0109371	0.0332452	0.0348909	0.0296304	0.0265546	0.106654	0.0185772	-0.00857909	84	0.0461008	0.0303586	0.0388841	0.0351549	0.00344199	0.0491865	0.0397808	0.00389491	0.0556587
	88	15.839	29.738	13.757	11.809	30.54	9.21	26.192	23.613	64.726	88	0.0969596	0.010088	0.0394409	0.0352415	0.0271416	0.0319328	0.105894	0.0107439	-0.00841057	88	0.0488295	0.0314386	0.0360759	0.0360812	0.0033252	0.0499845	0.040829	0.00376275	0.0565618
	92	15.86	29.421	13.816	11.774	30.547	9.226	26.051	23.512	64.741	92	0.098414	-0.000679325	0.0438988	0.0321732	0.027377	0.0337255	0.0999409	0.00642068	-0.00818077	92	0.0472111	0.0310919	0.0327269	0.0405224	0.0027022	0.0478998	0.0458546	0.00305777	0.0542027
	96	15.821	29.47	13.811	11.776	30.576	9.274	25.968	23.404	64.871	96	0.095713	0.000985021	0.043521	0.0323486	0.0283523	0.0391036	0.0964364	0.00179779	-0.0061892	96	0.0467397	0.0332682	0.0306817	0.0387395	0.00443711	0.0466098	0.043837	0.00502097	0.052743
	100	15.838	29.528	13.738	11.873	30.448	9.248	25.952	23.501	64.834	100	0.0968904	0.00295506	0.0380053	0.0408521	0.0240474	0.0361905	0.0957609	0.00594983	-0.00675603	100	0.0459502	0.0336966	0.0316516	0.0387582	0.00708352	0.0456279	0.0438583	0.00801561	0.0516319
	104	15.756	29.498	13.742	11.944	30.463	9.244	25.898	23.588	64.774	104	0.0912113	0.00193608	0.0383075	0.0470764	0.0245518	0.0357423	0.0934808	0.00967383	-0.00767522	104	0.0438183	0.0357902	0.0318265	0.0366542	0.00919566	0.0441678	0.0414773	0.0104057	0.0499797
	108	15.644	29.661	13.796	11.937	30.571	9.272	25.905	23.644	64.836	108	0.0834545	0.00747257	0.0423876	0.0464627	0.0281842	0.0388796	0.0937764	0.0120709	-0.00672539	108	0.0444382	0.0378421	0.0330406	0.0310534	0.00749815	0.0436268	0.0351396	0.0084848	0.0493675
	112	15.652	29.71	13.812	11.937	30.616	9.249	25.841	23.812	64.858	112	0.0840086	0.00913692	0.0435965	0.0464627	0.0296976	0.0363025	0.0910741	0.019262	-0.00638836	112	0.0455807	0.0374876	0.0346493	0.0305984	0.00689541	0.0412497	0.0346247	0.00780275	0.0466776
	116	15.667	29.751	13.881	11.968	30.593	9.239	25.802	23.861	64.892	116	0.0850474	0.0105295	0.04881	0.0491803	0.0289241	0.0351821	0.0894275	0.0213595	-0.00586748	116	0.048129	0.0377622	0.0349732	0.0304256	0.00846843	0.0400773	0.0344292	0.00958275	0.0453509
	120	15.663	29.794	13.781	11.953	30.543	9.244	26.01	23.854	64.886	120	0.0847704	0.0119901	0.0412543	0.0478653	0.0272425	0.0357423	0.0982098	0.0210598	-0.0059594	120	0.0460049	0.03695	0.0377701	0.0299017	0.00846246	0.0441379	0.0338364	0.009576	0.0499458
	124	15.74	29.837	13.685	11.911	30.512	9.254	26.217	23.944	64.833	124	0.0901032	0.0134506	0.0340008	0.0441834	0.0261998	0.0368627	0.10695	0.0249123	-0.00677135	124	0.0458515	0.0357487	0.0416969	0.0323958	0.0073839	0.0479195	0.0366587	0.00835551	0.054225
	128	15.794	29.796	14.204	11.913	30.478	9.261	26.339	23.993	64.872	128	0.0938431	0.012058	0.073215	0.0443587	0.0250563	0.0376471	0.112101	0.0270097	-0.00617388	128	0.0597053	0.0356874	0.0443123	0.0347283	0.00800108	0.0498115	0.039298	0.00905391	0.0563659
	132	15.691	29.734	14.788	11.882	30.497	9.293	26.415	24.065	64.896	132	0.0867096	0.00995211	0.11734	0.0416411	0.0256954	0.0412325	0.11531	0.0300916	-0.0058062	132	0.071334	0.0361896	0.0465318	0.0451691	0.00742246	0.0507936	0.0511127	0.00839915	0.0574773
	136	15.574	29.796	14.897	11.808	30.631	9.33	26.612	24.206	64.832	136	0.0786066	0.012058	0.125576	0.0351539	0.0302021	0.0453782	0.123628	0.036127	-0.00678667	136	0.0720802	0.0369114	0.0509894	0.0465728	0.006319	0.0542688	0.0527011	0.00715049	0.0614098
	140	15.611	29.955	14.954	11.805	30.731	9.316	26.478	24.377	64.78	140	0.0811691	0.0174586	0.129883	0.0348909	0.0335654	0.0438095	0.11797	0.0434466	-0.0075833	140	0.0761702	0.0374219	0.0512778	0.0460329	0.00454901	0.0515551	0.0520902	0.0051476	0.0583391
	144	15.785	30.013	15.059	11.775	30.75	9.297	26.24	24.512	64.826	144	0.0932198	0.0194287	0.137816	0.0322609	0.0342044	0.0416807	0.107921	0.0492252	-0.00687859	144	0.0834883	0.0360487	0.0500892	0.048819	0.0040607	0.0468707	0.0552429	0.00459504	0.0530382
	148	15.782	29.973	15.111	11.756	30.845	9.304	26.365	24.645	64.796	148	0.093012	0.01807	0.141745	0.0305952	0.0373995	0.042465	0.113199	0.0549182	-0.00733818	148	0.0842758	0.0368199	0.0535929	0.0508667	0.0048631	0.0492179	0.0575601	0.00550302	0.0556943
	152	15.737	29.954	15.052	11.787	30.89	9.286	26.422	24.699	64.778	152	0.0898954	0.0174247	0.137287	0.0333129	0.038913	0.0404482	0.115605	0.0572297	-0.00761394	152	0.0815359	0.037558	0.0550737	0.0492895	0.0030665	0.0503272	0.0557753	0.00347	0.0569496
	156	15.757	29.912	14.974	11.812	30.856	9.326	26.366	24.742	64.844	156	0.0912806	0.0159981	0.131394	0.0355045	0.0377695	0.04493	0.113241	0.0590703	-0.00660283	156	0.0795576	0.0394013	0.0552362	0.0478339	0.00401721	0.0490011	0.0541282	0.00454582	0.0554489
	160	15.754	29.959	15.079	11.815	30.825	9.328	26.273	24.74	64.81	160	0.0910728	0.0175945	0.139328	0.0357675	0.0367269	0.0451541	0.109314	0.0589847	-0.00712371	160	0.0826649	0.0392161	0.0537251	0.0500516	0.00421697	0.0476809	0.0566377	0.00477186	0.053955
	164	15.744	29.947	15.158	11.743	30.803	9.301	26.435	24.719	64.761	164	0.0903802	0.0171869	0.145297	0.0294556	0.035987	0.0421289	0.116154	0.0580858	-0.00787438	164	0.0842879	0.0358571	0.0554553	0.0524777	0.00517465	0.0506687	0.059383	0.00585556	0.057336
	168	15.707	29.934	15.094	11.738	30.808	9.356	26.568	24.819	64.712	168	0.0878177	0.0167454	0.140461	0.0290173	0.0361551	0.0482913	0.12177	0.0623662	-0.00862505	168	0.0816747	0.0378212	0.0585037	0.0506931	0.0079563	0.0533036	0.0573636	0.00900324	0.0603175
	172	15.771	30.007	15.146	11.831	30.809	9.386	26.517	24.888	64.763	172	0.0922502	0.0192249	0.14439	0.0371702	0.0361887	0.0516527	0.119617	0.0653198	-0.00784374	172	0.0852883	0.0416705	0.0590309	0.051335	0.0070698	0.0522251	0.0580899	0.00800009	0.0590972
	176	15.823	30.037	15.212	11.845	30.677	9.415	26.436	24.991	64.845	176	0.0958515	0.0202439	0.149377	0.0383975	0.0317492	0.054902	0.116197	0.0697286	-0.00658751	176	0.0884907	0.0416829	0.0597792	0.0529746	0.00973337	0.0506177	0.0599452	0.0110141	0.0572783
	180	15.807	29.879	15.177	11.873	30.58	9.418	26.384	25.101	64.851	180	0.0947434	0.0148772	0.146732	0.0408521	0.0284869	0.0552381	0.114001	0.0744371	-0.0064956	180	0.0854509	0.0415257	0.0606475	0.0542291	0.0109315	0.0501496	0.0613649	0.01237	0.0567486
	184	15.743	29.765	15.129	11.918	30.717	9.369	26.477	25.198	64.782	184	0.090311	0.0110051	0.143105	0.0447971	0.0330945	0.0497479	0.117928	0.0785892	-0.00755266	184	0.0814738	0.0425465	0.0629881	0.0542906	0.00698247	0.0524015	0.0614344	0.00790126	0.0592968
	188	15.606	29.928	15.18	11.887	30.871	9.355	26.526	25.227	64.678	188	0.0808228	0.0165416	0.146959	0.0420794	0.038274	0.0481793	0.119997	0.0798305	-0.00914592	188	0.0814411	0.0428442	0.0635604	0.0532444	0.00407982	0.0539629	0.0602506	0.00461667	0.0610636
	192	15.613	30.01	15.176	11.85	30.81	9.385	26.641	25.281	64.603	192	0.0813076	0.0193268	0.146657	0.0388358	0.0362224	0.0515406	0.124852	0.0821419	-0.0102949	192	0.0824303	0.0421996	0.0655664	0.0519882	0.00669071	0.0564048	0.0588291	0.00757111	0.0638268
	196	15.615	30.055	15.167	11.842	30.736	9.386	26.579	25.343	64.725	196	0.0814461	0.0208553	0.145977	0.0381345	0.0337336	0.0516527	0.122234	0.0847958	-0.00842589	196	0.0827593	0.0411736	0.0662015	0.051089	0.00762455	0.0549384	0.0578116	0.00862783	0.0621675
	200	15.592	30.159	15.148	11.839	30.872	9.399	26.499	25.395	64.761	200	0.0798532	0.0243878	0.144541	0.0378715	0.0383076	0.0531092	0.118857	0.0870217	-0.00787438	200	0.0829273	0.0430961	0.0660013	0.0491005	0.00708259	0.0538305	0.0555614	0.00801456	0.0609138
	204	15.617	30.086	15.111	11.902	30.923	9.409	26.514	25.497	64.614	204	0.0815846	0.0219082	0.141745	0.0433944	0.0400229	0.0542297	0.11949	0.0913877	-0.0101264	204	0.0817461	0.0458823	0.0669171	0.0489234	0.00606084	0.0556729	0.0553611	0.00685836	0.0629987
	208	15.676	30.008	15.213	11.968	30.89	9.419	26.397	25.608	64.624	208	0.0856708	0.0192589	0.149452	0.0491803	0.038913	0.0553501	0.11455	0.096139	-0.00997319	208	0.0847939	0.0478145	0.0669052	0.0531548	0.00677958	0.0548784	0.0601492	0.00767168	0.0620996
	212	15.594	30.014	15.269	11.942	30.86	9.461	26.295	25.668	64.757	212	0.0799917	0.0194627	0.153683	0.046901	0.037904	0.060056	0.110243	0.0987073	-0.00793566	212	0.0843793	0.048287	0.0670049	0.0548832	0.00909647	0.0531999	0.062105	0.0102934	0.0602002
	216	15.457	29.943	15.178	11.953	30.942	9.465	26.282	25.74	64.78	216	0.0705035	0.0170511	0.146808	0.0478653	0.0406619	0.0605042	0.109694	0.101789	-0.0075833	216	0.0781208	0.0496771	0.0679667	0.0532461	0.00820127	0.0535193	0.0602525	0.00928044	0.0605617
	220	15.487	29.896	15.153	12	30.951	9.447	26.439	25.872	64.741	220	0.0725812	0.0154546	0.144919	0.0519856	0.0409646	0.0584874	0.116323	0.107439	-0.00818077	220	0.0776515	0.0504792	0.0718606	0.052975	0.00723253	0.0567139	0.0599457	0.00818423	0.0641767
	224	15.493	29.984	15.167	12.008	30.815	9.397	26.629	25.868	64.695	224	0.0729967	0.0184437	0.145977	0.0526869	0.0363905	0.0528852	0.124346	0.107268	-0.00888548	224	0.079139	0.0473209	0.0742428	0.0522459	0.00772934	0.0591926	0.0591208	0.00874641	0.0669814
	228	15.449	30.133	15.2	11.94	30.768	9.4	26.785	25.897	64.787	228	0.0699494	0.0235046	0.14847	0.0467257	0.0348098	0.0532213	0.130932	0.10851	-0.00747606	228	0.0806413	0.0449189	0.0773219	0.051574	0.00762426	0.060656	0.0583604	0.0086275	0.0686374
	232	15.35	30.09	15.254	11.876	30.87	9.467	26.855	25.839	65.765	232	0.063093	0.0220441	0.15255	0.0411151	0.0382403	0.0607283	0.133888	0.106027	0.0075067	232	0.0792291	0.0466946	0.0824738	0.0544869	0.00999249	0.0542163	0.0616566	0.0113074	0.0613504
	236	15.403	30.015	15.207	11.907	30.968	9.509	26.917	25.571	66.645	236	0.0667636	0.0194966	0.148999	0.0438327	0.0415363	0.0654342	0.136506	0.0945553	0.0209881	236	0.0784197	0.0502677	0.0840163	0.0535077	0.0107652	0.047745	0.0605485	0.0121817	0.0540276
	240	15.55	30.227	15.24	11.984	31.014	9.46	27.059	25.392	66.673	240	0.0769444	0.0266975	0.151492	0.050583	0.0430834	0.059944	0.142501	0.0868932	0.0214171	240	0.0850447	0.0512035	0.0836039	0.0512682	0.00689725	0.0494871	0.0580144	0.00780483	0.0559989
	244	15.548	30.378	15.152	11.994	31.093	9.392	27.072	25.158	66.674	244	0.0768059	0.0318264	0.144843	0.0514596	0.0457404	0.0523249	0.14305	0.076877	0.0214324	244	0.0844918	0.0498417	0.0804532	0.0464579	0.00292145	0.0497146	0.0525711	0.00330587	0.0562563
	248	15.485	30.247	14.979	11.968	31.06	9.439	26.975	25.007	66.598	248	0.0724427	0.0273768	0.131772	0.0491803	0.0446305	0.057591	0.138955	0.0704135	0.0202681	248	0.0771971	0.0504673	0.0765454	0.0427515	0.00536879	0.0486472	0.048377	0.00607524	0.0550484
	252	15.471	30.191	14.955	12	30.993	9.491	26.981	24.953	66.594	252	0.0714731	0.0254747	0.129958	0.0519856	0.0423772	0.0634174	0.139208	0.068102	0.0202068	252	0.0756354	0.0525934	0.0758389	0.0427567	0.00860037	0.0488891	0.0483829	0.00973206	0.0553222
	256	15.518	30.228	15.1	12.03	31.078	9.444	27.098	24.86	66.585	256	0.0747282	0.0267314	0.140914	0.0546156	0.0452359	0.0581513	0.144148	0.0641212	0.0200689	256	0.0807913	0.0526676	0.0761127	0.0468117	0.00544961	0.0513598	0.0529714	0.0061667	0.058118
	260	15.498	30.043	15.193	12.082	31.2	9.412	27.219	24.772	66.471	260	0.073343	0.0204477	0.147941	0.0591742	0.0493391	0.0545658	0.149257	0.0603544	0.0183225	260	0.0805773	0.0543597	0.0759779	0.0522997	0.0040178	0.0545834	0.0591816	0.00454648	0.0617658
	264	15.381	29.917	15.067	12.103	31.241	9.434	27.146	24.676	66.393	264	0.06524	0.0161679	0.138421	0.0610152	0.0507181	0.0570308	0.146175	0.0562452	0.0171275	264	0.0732763	0.0562547	0.0731825	0.050232	0.00423945	0.0540274	0.0568418	0.0047973	0.0611366
	268	15.359	29.988	15.014	12.042	31.286	9.432	27.112	24.622	66.282	268	0.0637163	0.0185795	0.134416	0.0556676	0.0522315	0.0568067	0.144739	0.0539337	0.015427	268	0.0722374	0.0549019	0.0713666	0.0476725	0.00194469	0.0542115	0.0539455	0.00220059	0.061345
	272	15.387	29.96	15.018	12.079	31.237	9.413	27.059	24.607	66.23	272	0.0656555	0.0176285	0.134719	0.0589112	0.0505835	0.0546779	0.142501	0.0532917	0.0146304	272	0.0726675	0.0547242	0.0701411	0.0480583	0.00339991	0.0535454	0.0543821	0.00384729	0.0605912
	276	15.37	29.918	15.088	12.098	31.23	9.441	27.017	24.63	66.24	276	0.0644781	0.0162019	0.140008	0.0605768	0.0503481	0.0578151	0.140728	0.0542762	0.0147836	276	0.0735625	0.0562467	0.0699292	0.05095	0.00432063	0.0525944	0.0576543	0.00488916	0.0595151
	280	15.296	29.941	15.22	12.182	31.155	9.463	26.951	24.587	66.227	280	0.0593531	0.0169831	0.149981	0.0679407	0.0478256	0.0602801	0.137941	0.0524356	0.0145845	280	0.0754391	0.0586822	0.0683204	0.0554748	0.00828932	0.0515976	0.0627745	0.00938008	0.0583871
	284	15.244	29.955	15.22	12.201	31.171	9.445	26.823	24.565	66.18	284	0.0557518	0.0174586	0.149981	0.0696064	0.0483638	0.0582633	0.132537	0.0514939	0.0138644	284	0.0743972	0.0587445	0.065965	0.0556854	0.00867893	0.0495166	0.0630128	0.00982096	0.0560323
	288	15.24	30.04	15.16	12.032	31.262	9.432	26.846	24.564	66.149	288	0.0554748	0.0203458	0.145448	0.0547909	0.0514243	0.0568067	0.133508	0.0514511	0.0133895	288	0.0737561	0.0543407	0.0661161	0.0526832	0.00222029	0.0501225	0.0596155	0.00251245	0.0567179
	292	15.167	30.187	15.111	11.964	31.211	9.429	26.911	24.59	66.096	292	0.050419	0.0253388	0.141745	0.0488297	0.0497091	0.0564706	0.136252	0.052564	0.0125776	292	0.0725011	0.0516698	0.0671313	0.0500222	0.00341362	0.05153	0.0566044	0.0038628	0.0583107
	296	15.251	30.272	15.142	11.96	31.081	9.426	26.894	24.61	66.146	296	0.0562366	0.0282259	0.144088	0.048479	0.0453368	0.0561345	0.135535	0.0534201	0.0133435	296	0.0761834	0.0499834	0.0674327	0.0493585	0.00453465	0.0508588	0.0558534	0.00513135	0.0575511
	300	15.327	30.236	15.211	11.983	30.927	9.404	26.713	24.626	65.857	300	0.0615001	0.0270032	0.149301	0.0504953	0.0401574	0.0536695	0.127892	0.054105	0.00891612	300	0.0792681	0.0481074	0.0636378	0.0514845	0.00576892	0.0490373	0.0582591	0.00652802	0.0554899
	304	15.251	30.178	15.267	12.054	30.919	9.387	26.658	24.637	65.681	304	0.0562366	0.0250331	0.153532	0.0567196	0.0398883	0.0517647	0.12557	0.0545758	0.00621984	304	0.0782673	0.0494575	0.0621219	0.0547237	0.00706233	0.0490158	0.0619246	0.00799163	0.0554656
	308	15.329	30.165	15.175	12.034	30.992	9.329	26.704	24.556	65.74	308	0.0616386	0.0245916	0.146581	0.0549662	0.0423435	0.0452661	0.127512	0.0511086	0.00712371	308	0.0776037	0.0475253	0.0619149	0.0510655	0.00539514	0.0497389	0.0577849	0.00610506	0.0562838
	312	15.378	30.217	15.072	11.955	30.91	9.296	26.726	24.472	65.633	312	0.0650322	0.0263578	0.138799	0.0480407	0.0395856	0.0415686	0.128441	0.0475131	0.00548449	312	0.0767295	0.043065	0.0604796	0.046643	0.00361028	0.0510273	0.0527806	0.00408534	0.0577418
	316	15.375	30.304	15.012	12.008	30.794	9.328	26.899	24.428	65.661	316	0.0648244	0.0293129	0.134265	0.0526869	0.0356843	0.0451541	0.135746	0.0456297	0.00591344	316	0.0761342	0.0445084	0.0624296	0.0435866	0.00695632	0.0543187	0.0493219	0.00787167	0.0614662
	320	15.479	30.33	14.932	12.051	30.926	9.353	27.113	24.417	65.565	320	0.0720271	0.030196	0.128221	0.0564566	0.0401238	0.0479552	0.144781	0.0451588	0.00444274	320	0.0768146	0.0481785	0.0647943	0.0401613	0.0066697	0.0589513	0.045446	0.00754734	0.0667085
	324	15.405	30.339	14.904	11.939	31.009	9.39	27.115	24.507	65.481	324	0.0669021	0.0305017	0.126105	0.046638	0.0429153	0.0521008	0.144866	0.0490112	0.00315588	324	0.0745029	0.047218	0.0656776	0.0393982	0.00377235	0.0590409	0.0445825	0.00426874	0.0668099
	328	15.232	30.294	14.826	11.81	30.938	9.403	27.135	24.682	65.472	328	0.0549207	0.0289732	0.120212	0.0353292	0.0405274	0.0535574	0.14571	0.056502	0.003018	328	0.0680352	0.043138	0.0684101	0.0383849	0.00766719	0.0588592	0.0434358	0.00867608	0.0666043
	332	15.24	30.311	14.856	11.788	30.84	9.367	27.142	24.778	65.463	332	0.0554748	0.0295506	0.122478	0.0334005	0.0372314	0.0495238	0.146006	0.0606112	0.00288012	332	0.0691679	0.0400519	0.0698324	0.0391537	0.00687782	0.0587935	0.0443057	0.00778284	0.0665298
	336	15.302	30.324	14.923	11.869	30.894	9.344	27.297	24.863	65.468	336	0.0597687	0.0299922	0.127541	0.0405014	0.0390475	0.0469468	0.15255	0.0642496	0.00295672	336	0.0724338	0.0421652	0.0732522	0.0408185	0.00343276	0.0614022	0.0461897	0.00388446	0.0694818
	340	15.308	30.301	14.815	11.956	31.023	9.354	27.424	24.887	65.597	340	0.0601842	0.029211	0.11938	0.0481283	0.0433861	0.0480672	0.157913	0.0652769	0.00493298	340	0.0695919	0.0465272	0.0760408	0.0374078	0.00222123	0.0629157	0.0423301	0.00251351	0.0711945
	344	15.332	30.3	14.775	11.906	31.02	9.366	27.138	24.836	65.663	344	0.0618464	0.029177	0.116358	0.0437451	0.0432852	0.0494118	0.145837	0.0630939	0.00594408	344	0.0691272	0.0454807	0.0716249	0.035962	0.00278602	0.0574287	0.0406941	0.00315262	0.0649855
	348	15.311	30.319	14.757	11.814	30.894	9.41	27.002	24.804	65.522	348	0.060392	0.0298224	0.114998	0.0356798	0.0390475	0.0543417	0.140095	0.0617242	0.00378399	348	0.0684042	0.043023	0.0685342	0.0352314	0.00812076	0.0558565	0.0398673	0.00918933	0.0632064
	352	15.205	30.357	14.609	11.84	30.834	9.416	26.977	24.727	65.511	352	0.0530508	0.0311131	0.103816	0.0379591	0.0370296	0.055014	0.139039	0.0584282	0.00361547	352	0.0626598	0.0433342	0.0670276	0.0304485	0.00826756	0.0556198	0.0344551	0.00935545	0.0629386
	356	15.196	30.482	14.487	11.927	30.933	9.405	26.806	24.715	65.542	356	0.0524275	0.0353589	0.0945977	0.045586	0.0403592	0.0537815	0.131819	0.0579146	0.00409039	356	0.0607947	0.0465756	0.064608	0.0248973	0.00552413	0.0523593	0.0281735	0.00625103	0.0592491
	360	15.317	30.471	14.391	11.933	31.037	9.395	26.795	24.707	65.561	360	0.0608075	0.0349852	0.0873442	0.046112	0.043857	0.0526611	0.131355	0.0575721	0.00438146	360	0.0610456	0.0475434	0.064436	0.0213761	0.00373403	0.0520632	0.0241889	0.00422537	0.058914
	364	15.391	30.269	14.396	11.844	31.019	9.386	27.028	24.683	65.58	364	0.0659325	0.028124	0.0877219	0.0383098	0.0432516	0.0516527	0.141192	0.0565448	0.00467254	364	0.0605928	0.0444047	0.0674699	0.024622	0.00550788	0.0562668	0.0278619	0.00623264	0.0636707
	368	15.351	30.301	14.496	11.841	30.897	9.42	27.046	24.686	65.409	368	0.0631623	0.029211	0.0952777	0.0380468	0.0391484	0.0554622	0.141952	0.0566732	0.00205285	368	0.0625503	0.0442191	0.0668928	0.0269751	0.00796274	0.0575691	0.0305246	0.00901053	0.0651444
	372	15.241	30.336	14.603	11.9	30.828	9.412	26.829	24.629	65.279	372	0.055544	0.0303998	0.103362	0.0432191	0.0368278	0.0545658	0.13279	0.0542334	6.12792e-05	372	0.063102	0.0448709	0.0623616	0.0302625	0.00733512	0.0544903	0.0342446	0.00830032	0.0616604
	376	15.249	30.257	14.649	11.98	30.726	9.409	26.851	24.563	65.333	376	0.0560981	0.0277164	0.106838	0.0502323	0.0333972	0.0542297	0.133719	0.0514083	0.000888548	376	0.0635508	0.0459531	0.0620053	0.0327283	0.00902706	0.054743	0.0370348	0.0102149	0.0619465
	380	15.29	30.169	14.73	12.039	30.752	9.397	26.898	24.594	65.413	380	0.0589376	0.0247274	0.112958	0.0554046	0.0342717	0.0528852	0.135703	0.0527352	0.00211413	380	0.065541	0.0475205	0.0635176	0.0363214	0.0094246	0.055068	0.0411008	0.0106647	0.0623141
	384	15.29	30.17	14.813	12.06	30.812	9.372	26.729	24.6	65.387	384	0.0589376	0.0247614	0.119229	0.0572456	0.0362896	0.050084	0.128568	0.052992	0.00171582	384	0.0676428	0.0478731	0.0610919	0.0390545	0.00869689	0.0521029	0.0441935	0.00984127	0.0589589
	388	15.338	30.092	14.752	12.087	30.848	9.351	26.677	24.566	65.268	388	0.0622619	0.022112	0.11462	0.0596125	0.0375004	0.0477311	0.126372	0.0515367	-0.000107239	388	0.0663314	0.0482813	0.0592672	0.0378758	0.00903561	0.0519236	0.0428597	0.0102246	0.058756
	392	15.298	29.899	14.752	12.057	30.945	9.329	26.867	24.567	65.227	392	0.0594917	0.0155565	0.11462	0.0569826	0.0407628	0.0452661	0.134395	0.0515795	-0.00073535	392	0.0632228	0.0476705	0.0617462	0.0405286	0.00683647	0.055633	0.0458616	0.00773605	0.0629535
	396	15.294	29.67	14.741	12.016	30.942	9.32	27.081	24.512	65.106	396	0.0592146	0.00777827	0.113789	0.0533883	0.0406619	0.0442577	0.14343	0.0492252	-0.00258905	396	0.0602607	0.0461026	0.0633555	0.0432851	0.0053568	0.0604436	0.0489808	0.00606168	0.0683972
	400	15.362	29.074	14.678	11.968	30.981	9.365	27.073	24.495	65.02	400	0.0639241	-0.0124656	0.109029	0.0491803	0.0419736	0.0492997	0.143092	0.0484976	-0.00390655	400	0.0534959	0.0468179	0.0625611	0.0501451	0.00342579	0.0608304	0.0567435	0.00387657	0.0688348
	404	15.293	28.21	14.749	11.966	30.957	9.352	26.849	24.575	65.28	404	0.0591454	-0.0418124	0.114394	0.049005	0.0411664	0.0478431	0.133635	0.0519219	7.6599e-05	404	0.0439089	0.0460048	0.0618777	0.0646746	0.00345403	0.0549774	0.0731848	0.00390853	0.0622116
	408	15.251	27.136	14.707	11.993	30.964	9.311	26.829	24.615	65.375	408	0.0562366	-0.0782922	0.11122	0.051372	0.0414018	0.0432493	0.13279	0.0536341	0.00153198	408	0.0297216	0.045341	0.0626521	0.0796075	0.0043307	0.053964	0.0900827	0.00490056	0.0610649
	412	15.313	25.688	14.614	12.038	31.152	9.36	26.86	24.659	65.257	412	0.0605305	-0.127475	0.104193	0.0553169	0.0477248	0.0487395	0.134099	0.0555175	-0.000275756	412	0.0124162	0.0505937	0.0631136	0.100511	0.0033654	0.0551206	0.113737	0.00380823	0.0623737
	416	15.295	23.947	14.581	12.022	31.218	9.339	26.794	24.714	65.287	416	0.0592839	-0.186611	0.1017	0.0539143	0.0499445	0.0463866	0.131312	0.0578718	0.000183838	416	-0.0085422	0.0500818	0.0631226	0.127098	0.00307471	0.0536616	0.143823	0.00347929	0.0607227
	420	15.34	22.129	14.624	12.033	31.171	9.353	26.762	24.68	65.369	420	0.0624004	-0.248361	0.104949	0.0548786	0.0483638	0.0479552	0.129961	0.0564164	0.00144006	420	-0.0270039	0.0503992	0.0626059	0.157484	0.00317181	0.0526507	0.178207	0.00358917	0.0595788
	424	15.37	20.149	14.722	12.095	31.265	9.347	26.635	24.603	65.243	424	0.0644781	-0.315614	0.112354	0.0603138	0.0515252	0.0472829	0.124599	0.0531205	-0.000490234	424	-0.0462608	0.0530407	0.0590764	0.191462	0.0054267	0.0512408	0.216656	0.00614078	0.0579833
	428	15.299	18.295	14.713	12.058	31.305	9.294	26.625	24.551	65.104	428	0.0595609	-0.378588	0.111674	0.0570702	0.0528705	0.0413445	0.124177	0.0508946	-0.00261969	428	-0.0691177	0.0504284	0.0574839	0.21986	0.00664817	0.0519737	0.248791	0.00752297	0.0588127
	432	15.15	16.666	14.783	12.053	31.201	9.322	26.601	24.465	65.22	432	0.0492416	-0.433919	0.116963	0.0566319	0.0493728	0.0444818	0.123163	0.0472134	-0.000842589	432	-0.0892381	0.0501621	0.0565114	0.245289	0.00499157	0.0510503	0.277566	0.00564838	0.0577678
	436	15.104	14.966	14.908	12.142	31.158	9.315	26.662		65.288	436	0.0460558	-0.491661	0.126407	0.0644341	0.0479265	0.0436975	0.125739	0.0472134	0.000199157	436	-0.106399	0.0520194	0.0577172	0.274389	0.00894671	0.0517868	0.310495	0.010124	0.0586012
	440	15.229	13.3	14.963	12.126	31.186	9.321	27.064		65.158	440	0.0547129	-0.548249	0.130563	0.0630315	0.0488683	0.0443697	0.142712	0.0472134	-0.00179242	440	-0.120991	0.0520898	0.0627111	0.3037	0.00795189	0.060003	0.343662	0.00899825	0.0678986
	444	15.177	11.779	14.811	12.148	31.11	9.359	27.141		65.23	444	0.0511116	-0.599912	0.119078	0.0649601	0.0463122	0.0486275	0.145964	0.0472134	-0.000689391	444	-0.143241	0.0532999	0.0641625	0.324105	0.00829901	0.0610586	0.366753	0.00939104	0.069093
	448	15.131	10.494	14.742	12.137	30.945	9.289	26.906		65.363	448	0.0479258	-0.643558	0.113865	0.0639958	0.0407628	0.0407843	0.136041	0.0472134	0.00134814	448	-0.160589	0.0485143	0.0615343	0.34257	0.0109471	0.0559129	0.387647	0.0123876	0.0632702
	452	15.171	9.412	14.787	11.996	30.992	9.252	26.859		65.311	452	0.050696	-0.68031	0.117265	0.051635	0.0423435	0.0366387	0.134057	0.0472134	0.000551513	452	-0.170783	0.043539	0.0606072	0.361313	0.0061803	0.05532	0.408857	0.00699354	0.0625993
	456	15.155	8.504	14.761	12.006	31.036	9.341	27.009		65.268	456	0.0495879	-0.711151	0.1153	0.0525116	0.0438234	0.0466106	0.14039	0.0472134	-0.000107239	456	-0.182088	0.0476485	0.0624988	0.375065	0.0036221	0.0583673	0.424418	0.00409871	0.0660476
	460	15.204	7.696	14.864	12.123	31.083	9.375	27.063		65.138	460	0.0529815	-0.738596	0.123083	0.0627685	0.0454041	0.0504202	0.14267	0.0472134	-0.00209881	460	-0.187511	0.0528642	0.0625949	0.390726	0.0072966	0.0600941	0.44214	0.00825673	0.0680017
	464	15.281	7.116	14.888	12.199	31.105	9.322	26.891		65.073	464	0.0583143	-0.758296	0.124896	0.0694311	0.046144	0.0444818	0.135408	0.0472134	-0.0030946	464	-0.191695	0.0533523	0.0598422	0.401568	0.0113896	0.0572442	0.454409	0.0128884	0.0647767
	468	15.161	6.748	14.792	12.21	31.133	9.327	26.951		64.956	468	0.0500035	-0.770796	0.117643	0.0703954	0.0470857	0.045042	0.137941	0.0472134	-0.00488702	468	-0.20105	0.0541744	0.0600892	0.403816	0.0115003	0.0590159	0.456953	0.0130136	0.0667816
	472	14.987	6.396	14.782	12.223	31.178	9.343	27.182		65.013	472	0.0379528	-0.782752	0.116887	0.071535	0.0485992	0.0468347	0.147695	0.0472134	-0.00401379	472	-0.209304	0.0556563	0.0636314	0.406767	0.011251	0.0630134	0.460292	0.0127315	0.071305
	476	15.036	6.136	14.768	12.204	31.13	9.285	27.219		65.124	476	0.0413464	-0.791583	0.115829	0.0698694	0.0469848	0.0403361	0.149257	0.0472134	-0.00231329	476	-0.211469	0.0523968	0.064719	0.411328	0.0126496	0.0631042	0.465453	0.0143142	0.0714078
	480	15.113	5.978	14.643	12.222	31.077	9.266	27.163		64.946	480	0.0466791	-0.79695	0.106385	0.0714474	0.0452023	0.0382073	0.146892	0.0472134	-0.00504021	480	-0.214629	0.051619	0.0630219	0.412484	0.0143086	0.0630255	0.466761	0.0161915	0.0713187
	484	14.946	5.896	14.515	12.287	31.009	9.255	27.111		64.893	484	0.0351132	-0.799735	0.0967133	0.0771456	0.0429153	0.0369748	0.144697	0.0472134	-0.00585216	484	-0.222636	0.0523452	0.0620194	0.408845	0.0177034	0.0623467	0.462643	0.0200329	0.0705506
	488	14.654	5.838	14.511	12.33	31.126	9.249	27.146		64.817	488	0.0148902	-0.801705	0.096411	0.0809152	0.0468503	0.0363025	0.146175	0.0472134	-0.00701647	488	-0.230135	0.0546893	0.0621239	0.405529	0.0190379	0.0634225	0.458891	0.021543	0.071768
	492	14.548	5.724	14.522	12.266	31.279	9.293	27.031		64.804	492	0.007549	-0.805577	0.0972422	0.0753046	0.0519961	0.0412325	0.141319	0.0472134	-0.00721563	492	-0.233595	0.0561777	0.0604389	0.406106	0.0142207	0.0613559	0.459544	0.0160919	0.0694295
	496	14.638	5.618	14.491	12.259	31.339	9.308	26.989		64.877	496	0.0137821	-0.809178	0.0948999	0.074691	0.0540141	0.0429132	0.139546	0.0472134	-0.00609728	496	-0.233499	0.0572061	0.0602206	0.408411	0.0131681	0.0601657	0.462153	0.0149009	0.0680826
	500	14.649	5.56	14.516	12.299	31.328	9.265	27.15		64.793	500	0.0145439	-0.811148	0.0967888	0.0781976	0.0536441	0.0380952	0.146344	0.0472134	-0.00738414	500	-0.233272	0.0566456	0.0620576	0.409997	0.0165087	0.0636308	0.463947	0.018681	0.0720037
	504	14.66	5.517	14.502	12.262	31.307	9.241	27.091		64.767	504	0.0153058	-0.812608	0.095731	0.074954	0.0529378	0.0354062	0.143852	0.0472134	-0.00778246	504	-0.233857	0.0544327	0.0610945	0.410554	0.0161799	0.062678	0.464577	0.0183089	0.0709255
	508	14.756	5.556	14.531	12.221	31.313	9.268	27.079		64.761	508	0.0219544	-0.811284	0.0979222	0.0713597	0.0531396	0.0384314	0.143346	0.0472134	-0.00787438	508	-0.230469	0.0543102	0.0608949	0.411867	0.0134684	0.0624888	0.466063	0.0152406	0.0707114
	512	14.827	5.603	14.486	12.101	31.211	9.25	27.118		64.753	512	0.0268717	-0.809687	0.0945221	0.0608398	0.0497091	0.0364146	0.144992	0.0472134	-0.00799694	512	-0.229431	0.0489878	0.061403	0.411231	0.00998461	0.0632584	0.465344	0.0112984	0.0715823
	516	14.882	5.64	14.469	12.087	31.105	9.196	27.105		64.681	516	0.0306808	-0.80843	0.0932376	0.0596125	0.046144	0.0303641	0.144444	0.0472134	-0.00909996	516	-0.228171	0.0453736	0.0608523	0.4111	0.011953	0.0634214	0.465194	0.0135259	0.0717668
	520	14.816	5.737	14.613	12.128	31.067	9.201	27.145		64.643	520	0.0261098	-0.805136	0.104118	0.0632068	0.044866	0.0309244	0.146132	0.0472134	-0.00968211	520	-0.224969	0.0463324	0.0612212	0.411474	0.01322	0.0643776	0.465618	0.0149595	0.0728487
	524	14.68	5.858	14.523	11.963	31.195	9.194	27.118		64.705	524	0.0166909	-0.801026	0.0973177	0.048742	0.049171	0.0301401	0.144992	0.0472134	-0.00873229	524	-0.229006	0.0426843	0.0611578	0.405816	0.00887187	0.0635277	0.459216	0.0100393	0.0718871
	528	14.548	5.919	14.318	11.951	31.233	9.212	27.125		64.628	528	0.007549	-0.798954	0.0818285	0.04769	0.050449	0.0321569	0.145288	0.0472134	-0.00991191	528	-0.236525	0.043432	0.0608632	0.398851	0.00805187	0.064091	0.451335	0.00911138	0.0725245
	532	14.403	5.884	14.375	12.067	31.083	9.249	27.212		64.501	532	-0.00249325	-0.800143	0.0861352	0.0578592	0.0454041	0.0363025	0.148961	0.0472134	-0.0118575	532	-0.238834	0.0465219	0.0614391	0.398551	0.00883591	0.0664201	0.450995	0.00999859	0.0751601
	536	14.265	5.934	14.475	12.054	31.084	9.194	27.189		64.476	536	-0.0120507	-0.798444	0.093691	0.0567196	0.0454377	0.0301401	0.14799	0.0472134	-0.0122405	536	-0.238935	0.0440991	0.0609877	0.397981	0.0108922	0.0661351	0.45035	0.0123255	0.0748375
	540	14.088	6.043	14.351	12.054	31.017	9.162	27.097		64.568	540	-0.0243092	-0.794742	0.0843219	0.0567196	0.0431843	0.0265546	0.144106	0.0472134	-0.0108311	540	-0.24491	0.0421528	0.0601627	0.391311	0.0123364	0.063912	0.442802	0.0139597	0.0723219
	544	13.897	6.097	14.282	12.108	31.038	9.215	27.145		64.547	544	-0.0375372	-0.792908	0.0791084	0.0614535	0.0438906	0.032493	0.146132	0.0472134	-0.0111528	544	-0.250446	0.0459457	0.060731	0.386523	0.011912	0.0649189	0.437384	0.0134795	0.0734614
	548	13.811	6.228	14.218	12.107	31.174	9.214	27.196		64.413	548	-0.0434933	-0.788458	0.0742728	0.0613658	0.0484647	0.032381	0.148286	0.0472134	-0.0132057	548	-0.25256	0.0474038	0.0607645	0.381975	0.0118568	0.0666213	0.432238	0.013417	0.0753877
	552	13.727	6.382	14.186	12.067	31.089	9.166	27.199		64.306	552	-0.0493109	-0.783227	0.0718549	0.0578592	0.0456059	0.0270028	0.148412	0.0472134	-0.0148449	552	-0.253561	0.0434893	0.0602603	0.377783	0.0126857	0.067285	0.427494	0.0143549	0.0761387
	556	13.603	6.393	14.314	12.056	31.008	9.214	27.11		64.282	556	-0.0578987	-0.782854	0.0815263	0.0568949	0.0428816	0.032381	0.144655	0.0472134	-0.0152126	556	-0.253075	0.0440525	0.0588852	0.37891	0.010042	0.0657853	0.428769	0.0113633	0.0744417
	560	13.48	6.369	14.314	12.079	31.106	9.23	27.021		64.197	560	-0.0664173	-0.783669	0.0815263	0.0589112	0.0461776	0.0341737	0.140897	0.0472134	-0.0165147	560	-0.256187	0.0464208	0.0571985	0.377845	0.0101005	0.0646497	0.427564	0.0114296	0.0731567
	564	13.248	6.414	14.189	12.14	31.075	9.208	27.204		64.107	564	-0.0824849	-0.782141	0.0720816	0.0642588	0.045135	0.0317087	0.148624	0.0472134	-0.0178935	564	-0.264181	0.0470342	0.0593145	0.371649	0.0133562	0.0685167	0.420552	0.0151137	0.0775325
	568	13.087	6.53	14.08	12.132	30.903	9.215	27.411		64.093	568	-0.0936353	-0.7782	0.0638459	0.0635575	0.0393502	0.032493	0.157364	0.0472134	-0.018108	568	-0.26933	0.0451336	0.0621563	0.365524	0.0133251	0.0724111	0.413622	0.0150784	0.0819393
	572	13.016	6.627	13.982	12.094	30.817	9.2	27.385		64.005	572	-0.0985525	-0.774906	0.0564413	0.0602262	0.0364578	0.0308123	0.156266	0.0472134	-0.0194561	572	-0.272339	0.0424988	0.061341	0.360958	0.0127453	0.0724304	0.408455	0.0144224	0.0819612
	576	12.897	6.677	14.021	12.113	30.893	9.179	27.206		63.854	576	-0.106794	-0.773207	0.059388	0.0618918	0.0390139	0.0284594	0.148708	0.0472134	-0.0217694	576	-0.273538	0.0431217	0.0580507	0.359774	0.0139544	0.0700177	0.407116	0.0157906	0.0792311
	580	12.759	6.812	14.166	12.12	30.783	9.178	27.249		63.873	580	-0.116352	-0.768622	0.0703438	0.0625055	0.0353143	0.0283473	0.150524	0.0472134	-0.0214784	580	-0.271543	0.0420557	0.0587529	0.359657	0.0147372	0.070692	0.406982	0.0166765	0.079994
	584	12.516	6.989	14.288	12.107	30.58	9.198	27.336		64.002	584	-0.133181	-0.76261	0.0795618	0.0613658	0.0284869	0.0305882	0.154197	0.0472134	-0.0195021	584	-0.272076	0.040147	0.0606361	0.357568	0.0150285	0.0715447	0.404619	0.017006	0.080959
	588	12.396	7.064	14.316	12.147	30.566	9.216	27.445		63.994	588	-0.141492	-0.760062	0.0816774	0.0648724	0.028016	0.032605	0.158799	0.0472134	-0.0196247	588	-0.273292	0.0418312	0.0621293	0.356052	0.0164	0.0736009	0.402904	0.018558	0.0832857
	592	12.431	7.072	14.284	12.153	30.539	9.256	27.525		63.993	592	-0.139068	-0.759791	0.0792595	0.0653984	0.0271079	0.0370868	0.162177	0.0472134	-0.01964	592	-0.2732	0.0431977	0.0632501	0.355429	0.0162183	0.0750877	0.402199	0.0183524	0.0849681
	596	12.293	7.176	14.264	12.189	30.615	9.295	27.477		63.994	596	-0.148625	-0.756258	0.0777484	0.0685544	0.029664	0.0414566	0.16015	0.0472134	-0.0196247	596	-0.275712	0.0465583	0.0625797	0.352141	0.0162816	0.0741928	0.398478	0.018424	0.0839555
	600	12.07	7.28	14.287	12.212	30.484	9.307	27.395		64.021	600	-0.16407	-0.752726	0.0794862	0.0705707	0.0252581	0.0428011	0.156688	0.0472134	-0.019211	600	-0.279103	0.04621	0.0615635	0.349351	0.0186552	0.0725239	0.39532	0.0211099	0.082067
	604	12.064	7.307	14.214	12.2	30.277	9.303	27.404		63.904	604	-0.164485	-0.751809	0.0739705	0.0695187	0.0182962	0.0423529	0.157068	0.0472134	-0.0210034	604	-0.280774	0.0433893	0.0610927	0.347006	0.0209244	0.0733568	0.392668	0.0236777	0.0830096
	608	12.115	7.378	14.161	12.181	30.161	9.255	27.58		63.716	608	-0.160953	-0.749397	0.069966	0.0678531	0.0143948	0.0369748	0.164499	0.0472134	-0.0238836	608	-0.280128	0.0397409	0.0626097	0.344955	0.0219117	0.0776737	0.390346	0.024795	0.0878944
	612	11.997	7.448	14.179	12.167	30.025	9.214	27.635		63.708	612	-0.169125	-0.747019	0.071326	0.0666258	0.00982074	0.032381	0.166821	0.0472134	-0.0240061	612	-0.281606	0.0362758	0.0633429	0.343425	0.0233535	0.0787355	0.388615	0.0264265	0.089096
	616	11.916	7.499	14.154	12.144	29.976	9.236	27.589		63.723	616	-0.174735	-0.745287	0.0694371	0.0646095	0.00817274	0.0348459	0.164879	0.0472134	-0.0237763	616	-0.283528	0.035876	0.0627721	0.34139	0.0230517	0.0778001	0.386312	0.026085	0.0880375
	620	11.869	7.559	14.153	12.159	29.777	9.23	27.561		63.718	620	-0.17799	-0.743249	0.0693615	0.0659244	0.00147984	0.0341737	0.163697	0.0472134	-0.0238529	620	-0.283959	0.0338593	0.0623525	0.340104	0.0263103	0.0773117	0.384857	0.0297724	0.0874848
	624	11.811	7.578	14.061	12.126	29.499	9.224	27.546		63.737	624	-0.182007	-0.742604	0.0624103	0.0630315	-0.00787004	0.0335014	0.163064	0.0472134	-0.0235619	624	-0.2874	0.0295543	0.0622384	0.336989	0.0290797	0.0769267	0.381332	0.0329061	0.0870492
	628	11.732	7.631	13.99	11.951	29.307	9.256	27.514		63.717	628	-0.187478	-0.740804	0.0570457	0.04769	-0.0143275	0.0370868	0.161713	0.0472134	-0.0238682	628	-0.290412	0.0234831	0.0616859	0.333754	0.0270843	0.0764511	0.377671	0.0306482	0.0865109
	632	11.573	7.697	14.058	11.935	29.155	9.245	27.581		63.573	632	-0.19849	-0.738562	0.0621836	0.0462874	-0.0194397	0.0358543	0.164541	0.0472134	-0.0260743	632	-0.291623	0.0209007	0.0618935	0.33347	0.0288412	0.0785078	0.37735	0.0326363	0.0888384
	636	11.52	7.768	14.17	11.997	28.87	9.242	27.654		63.352	636	-0.202161	-0.73615	0.070646	0.0517226	-0.029025	0.0355182	0.167624	0.0472134	-0.02946	636	-0.289222	0.0194053	0.0617924	0.335077	0.0348785	0.0811168	0.379168	0.039468	0.0917906
	640	11.454	7.812	14.145	12.041	28.5	9.267	27.61		63.312	640	-0.206732	-0.734656	0.0687571	0.0555799	-0.0414691	0.0383193	0.165766	0.0472134	-0.0300728	640	-0.290877	0.0174767	0.0609689	0.333345	0.0422724	0.0805403	0.377208	0.0478349	0.0911382
	644	11.325	7.784	14.002	12.104	28.324	9.253	27.576		63.327	644	-0.215666	-0.735607	0.0579524	0.0611028	-0.0473884	0.0367507	0.16433	0.0472134	-0.029843	644	-0.297773	0.0168217	0.0605669	0.32913	0.0464791	0.0798313	0.372439	0.0525951	0.090336
	648	11.26	7.82	13.852	12.145	28.154	9.224	27.443		63.225	648	-0.220168	-0.734384	0.0466188	0.0646971	-0.053106	0.0335014	0.158715	0.0472134	-0.0314056	648	-0.302644	0.0150308	0.0581742	0.324133	0.0498348	0.0780023	0.366784	0.0563924	0.0882663
	652	11.142	7.901	13.789	12.09	27.916	9.247	27.297		63.148	652	-0.22834	-0.731633	0.0418587	0.0598755	-0.0611106	0.0360784	0.15255	0.0472134	-0.0325852	652	-0.306038	0.0116145	0.0557262	0.32052	0.052334	0.0758206	0.362696	0.0592204	0.0857975
	656	10.984	7.982	13.854	12.017	27.774	9.31	27.331		63.081	656	-0.239282	-0.728881	0.0467699	0.0534759	-0.0658864	0.0431373	0.153986	0.0472134	-0.0336116	656	-0.307131	0.0102423	0.0558625	0.320272	0.0539963	0.0768301	0.362415	0.0611014	0.0869399
	660	10.855	8.042	13.868	12.005	27.477	9.285	27.38		62.977	660	-0.248217	-0.726844	0.0478277	0.052424	-0.0758753	0.0403361	0.156055	0.0472134	-0.0352049	660	-0.309077	0.00562826	0.0560211	0.319173	0.0578426	0.0783294	0.361171	0.0654539	0.0886364
	664	10.823	8.061	13.771	12.024	27.171	9.195	27.295		63.252	664	-0.250433	-0.726198	0.0404987	0.0540896	-0.0861669	0.0302521	0.152466	0.0472134	-0.030992	664	-0.312044	-0.000608397	0.0562291	0.31602	0.0612767	0.0751671	0.357604	0.0693398	0.0850581
	668	10.785	8.137	13.804	12.046	26.91	9.16	27.412		64.08	668	-0.253065	-0.723617	0.0429921	0.0560182	-0.094945	0.0263305	0.157406	0.0472134	-0.0183072	668	-0.31123	-0.00419875	0.062104	0.315658	0.0653019	0.0725032	0.357194	0.0738947	0.0820435
	672	10.699	8.247	13.788	12.098	26.562	9.194	27.442		64.569	672	-0.259021	-0.71988	0.0417832	0.0605768	-0.106649	0.0301401	0.158673	0.0472134	-0.0108158	672	-0.312373	-0.00531076	0.0650234	0.313228	0.0727265	0.07033	0.354444	0.0822962	0.0795844
	676	10.62	8.271	13.715	12.032	26.183	9.228	27.24		64.579	676	-0.264492	-0.719065	0.0362675	0.0547909	-0.119396	0.0339496	0.150144	0.0472134	-0.0106626	676	-0.315763	-0.0102185	0.0622315	0.310487	0.0776676	0.0665022	0.351343	0.0878875	0.0752529
	680	10.44	8.21	13.803	11.944	25.767	9.247	27.322		64.424	680	-0.276958	-0.721137	0.0429165	0.0470764	-0.133387	0.0360784	0.153606	0.0472134	-0.0130372	680	-0.318393	-0.0167441	0.062594	0.313297	0.0826012	0.0688955	0.354522	0.0934703	0.0779612
	684	10.172	8.164	13.817	11.95	25.357	9.251	27.351		64.27	684	-0.295519	-0.7227	0.0439743	0.0476023	-0.147177	0.0365266	0.15483	0.0472134	-0.0153964	684	-0.324748	-0.0210159	0.0622158	0.313675	0.0893236	0.0702997	0.35495	0.101077	0.0795502
	688	10.083	8.161	13.816	11.913	25.027	9.22	27.347		64.185	688	-0.301683	-0.722802	0.0438988	0.0443587	-0.158275	0.0330532	0.154661	0.0472134	-0.0166986	688	-0.326862	-0.0269545	0.0617254	0.31351	0.0929725	0.070706	0.354763	0.105206	0.0800099
	692	10.023	8.112	13.786	11.89	24.468	9.243	27.432		64.247	692	-0.305838	-0.724466	0.041632	0.0423424	-0.177076	0.0356303	0.15825	0.0472134	-0.0157488	692	-0.329557	-0.0330344	0.0632383	0.313208	0.10189	0.0719329	0.354421	0.115297	0.0813983
	696	9.79	8.163	13.661	11.962	23.807	9.255	27.469		64.483	696	-0.321975	-0.722734	0.0321874	0.0486543	-0.199307	0.0369748	0.159813	0.0472134	-0.0121333	696	-0.337507	-0.0378927	0.0649642	0.308391	0.114237	0.0713099	0.348971	0.129269	0.0806933
	700	9.646	8.19	13.665	12.01	23.449	9.202	27.467		64.386	700	-0.331948	-0.721817	0.0324896	0.0528623	-0.211348	0.0310364	0.159728	0.0472134	-0.0136193	700	-0.340425	-0.042483	0.0644407	0.308003	0.119737	0.0718095	0.348531	0.135493	0.0812586
	704	9.511	8.133	13.682	11.975	22.996	9.174	27.493		64.088	704	-0.341298	-0.723753	0.0337741	0.049794	-0.226583	0.0278992	0.160826	0.0472134	-0.0181846	704	-0.343759	-0.04963	0.0632849	0.309264	0.125444	0.073959	0.349959	0.14195	0.083691
	708	9.442	8.154	13.613	11.984	22.406	9.197	27.528		64.12	708	-0.346077	-0.723039	0.0285606	0.050583	-0.246427	0.0304762	0.162304	0.0472134	-0.0176944	708	-0.346852	-0.0551225	0.0639409	0.30684	0.135521	0.0744297	0.347216	0.153354	0.0842236
	712	9.393	8.124	13.474	12.001	21.913	9.216	27.43		64.281	712	-0.34947	-0.724058	0.0180582	0.0520733	-0.263007	0.032605	0.158166	0.0472134	-0.0152279	712	-0.351823	-0.059443	0.0633838	0.302972	0.144161	0.0717052	0.342839	0.163131	0.0811406
	716	9.199	8.031	13.337	11.976	21.451	9.2	27.408		64.256	716	-0.362906	-0.727217	0.00770684	0.0498817	-0.278546	0.0308123	0.157237	0.0472134	-0.0156109	716	-0.360805	-0.0659506	0.0629465	0.300035	0.150529	0.0714364	0.339515	0.170336	0.0808364
	720	9.021	7.919	13.206	12.03	20.939	9.137	27.484		64.187	720	-0.375234	-0.731021	-0.00219116	0.0546156	-0.295766	0.0237535	0.160446	0.0472134	-0.0166679	720	-0.369482	-0.0724655	0.0636638	0.297571	0.158399	0.0732361	0.336728	0.179242	0.0828729
	724	8.78	7.855	13.142	12.017	20.417	9.123	27.462		64.212	724	-0.391925	-0.733195	-0.00702682	0.0534759	-0.313322	0.0221849	0.159517	0.0472134	-0.0162849	724	-0.377382	-0.0792204	0.0634818	0.296635	0.166027	0.0726869	0.335668	0.187874	0.0822514
	728	8.568	7.811	13.175	11.892	19.858	9.195	27.317		64.163	728	-0.406607	-0.73469	-0.00453343	0.0425178	-0.332123	0.0302521	0.153395	0.0472134	-0.0170356	728	-0.381943	-0.0864509	0.0611908	0.298595	0.173788	0.0702764	0.337886	0.196656	0.0795237
	732	8.396	7.758	13.119	11.793	19.371	9.207	27.258		64.047	732	-0.418519	-0.73649	-0.00876464	0.0338389	-0.348502	0.0315966	0.150904	0.0472134	-0.0188127	732	-0.387925	-0.0943554	0.0597681	0.297879	0.179711	0.0698528	0.337076	0.203358	0.0790444
	736	8.188	7.694	13.124	11.684	19.01	9.176	27.375		64.094	736	-0.432925	-0.738664	-0.00838685	0.0242833	-0.360643	0.0281232	0.155844	0.0472134	-0.0180927	736	-0.393325	-0.102745	0.0616548	0.299446	0.182368	0.0717397	0.338849	0.206365	0.0811796
	740	8.069	7.566	13.164	11.654	18.617	9.158	27.53		64.153	740	-0.441166	-0.743011	-0.00536456	0.0216534	-0.373861	0.0261064	0.162388	0.0472134	-0.0171888	740	-0.396514	-0.1087	0.0641376	0.302794	0.187506	0.0742823	0.342637	0.212179	0.0840568
	744	7.902	7.375	13.054	11.712	18.256	9.163	27.547		64.115	744	-0.452732	-0.749499	-0.0136759	0.026738	-0.386002	0.0266667	0.163106	0.0472134	-0.017771	744	-0.405302	-0.110866	0.0641828	0.302265	0.194551	0.0748112	0.342039	0.220151	0.0846553
	748	7.677	7.183	12.761	11.729	18.007	9.141	27.416		64.018	748	-0.468315	-0.756021	-0.0358141	0.0282283	-0.394377	0.0242017	0.157575	0.0472134	-0.019257	748	-0.42005	-0.113982	0.0618437	0.295997	0.198276	0.0729287	0.334946	0.224366	0.0825251
	752	7.503	7.016	12.51	11.715	17.738	9.119	27.342		63.84	752	-0.480366	-0.761693	-0.054779	0.027001	-0.403424	0.0217367	0.15445	0.0472134	-0.0219839	752	-0.432279	-0.118229	0.0598933	0.290593	0.201675	0.0725848	0.32883	0.228212	0.082136
	756	7.313	6.811	12.392	11.728	17.399	9.149	27.276		63.735	756	-0.493524	-0.768656	-0.0636947	0.0281406	-0.414825	0.025098	0.151664	0.0472134	-0.0235925	756	-0.441958	-0.120529	0.0584282	0.2901	0.208103	0.0719861	0.328273	0.235486	0.0814585
	760	7.03	6.646	12.348	11.668	17.063	9.142	27.215		63.824	760	-0.513124	-0.77426	-0.0670193	0.0228807	-0.426126	0.0243137	0.149088	0.0472134	-0.022229	760	-0.451468	-0.12631	0.0580241	0.292003	0.212002	0.0703564	0.330426	0.239899	0.0796143
	764	6.745	6.51	12.234	11.555	16.814	9.112	27.32		63.86	764	-0.532862	-0.77888	-0.0756328	0.0129745	-0.4345	0.0209524	0.153521	0.0472134	-0.0216775	764	-0.462458	-0.133525	0.0596858	0.291384	0.212847	0.0720663	0.329726	0.240855	0.0815492
	768	6.526	6.302	12.039	11.497	16.641	9.105	27.397		63.771	768	-0.54803	-0.785945	-0.0903665	0.00788989	-0.440319	0.0201681	0.156773	0.0472134	-0.023041	768	-0.47478	-0.13742	0.060315	0.288654	0.21424	0.0739908	0.326636	0.242431	0.0837269
	772	6.316	6.093	11.746	11.526	16.377	9.034	27.154		63.704	772	-0.562574	-0.793044	-0.112505	0.0104322	-0.449198	0.0122129	0.146512	0.0472134	-0.0240674	772	-0.489374	-0.142184	0.0565528	0.282609	0.217093	0.0699513	0.319797	0.245659	0.0791559
	776	6.039	5.939	11.433	11.575	16.159	8.939	27.081		63.602	776	-0.581758	-0.798275	-0.136154	0.0147278	-0.45653	0.00156863	0.14343	0.0472134	-0.02563	776	-0.505395	-0.146744	0.0550045	0.27565	0.219117	0.0692381	0.311921	0.24795	0.0783488
	780	5.783	5.747	11.311	11.552	16.016	8.881	27.237		63.452	780	-0.599487	-0.804796	-0.145372	0.0127115	-0.461339	-0.00492997	0.150017	0.0472134	-0.027928	780	-0.516552	-0.151186	0.0564341	0.275522	0.21943	0.0729377	0.311777	0.248304	0.0825353
	784	5.55	5.599	11.122	11.572	15.823	8.81	27.226		63.37	784	-0.615624	-0.809823	-0.159652	0.0144648	-0.46783	-0.0128852	0.149552	0.0472134	-0.0291842	784	-0.528367	-0.155417	0.0558605	0.272508	0.221192	0.0732247	0.308366	0.250297	0.08286
	788	5.277	5.457	10.885	11.508	15.677	8.711	27.18		63.413	788	-0.634531	-0.814646	-0.17756	0.00885421	-0.472741	-0.0239776	0.14761	0.0472134	-0.0285255	788	-0.542246	-0.162621	0.0554327	0.268151	0.219697	0.0721416	0.303436	0.248606	0.0816344
	792	5.024	5.267	10.763	11.336	15.507	8.641	27.217		63.437	792	-0.652053	-0.8211	-0.186777	-0.00622425	-0.478458	-0.0318207	0.149172	0.0472134	-0.0281578	792	-0.55331	-0.172168	0.056076	0.268209	0.216832	0.0726655	0.303501	0.245364	0.0822272
	796	4.878	5.131	10.573	11.263	15.297	8.554	27.362		63.37	796	-0.662165	-0.825719	-0.201133	-0.0126238	-0.485521	-0.0415686	0.155295	0.0472134	-0.0291842	796	-0.563006	-0.179905	0.0577746	0.264451	0.216426	0.0756826	0.299249	0.244905	0.0856413
	800	4.756	4.977	10.339	11.223	15.166	8.397	27.46		63.425	800	-0.670614	-0.83095	-0.218814	-0.0161304	-0.489927	-0.0591597	0.159433	0.0472134	-0.0283416	800	-0.573459	-0.188406	0.0594348	0.259174	0.21393	0.077144	0.293278	0.24208	0.0872951
	804	4.549	4.82	10.182	11.159	15.01	8.279	27.294		63.521	804	-0.68495	-0.836283	-0.230676	-0.021741	-0.495174	-0.072381	0.152424	0.0472134	-0.0268709	804	-0.58397	-0.196432	0.0575887	0.257342	0.212252	0.0735634	0.291205	0.240181	0.0832433
	808	4.375	4.674	10.011	10.971	14.859	8.197	27.092		63.425	808	-0.697001	-0.841242	-0.243597	-0.0382221	-0.500252	-0.0815686	0.143895	0.0472134	-0.0283416	808	-0.593947	-0.206681	0.0542555	0.254637	0.208339	0.0704912	0.288144	0.235754	0.0797669
	812	4.243	4.528	9.688	10.771	14.701	8.093	27.108		63.277	812	-0.706143	-0.846201	-0.268002	-0.0557552	-0.505566	-0.0932213	0.14457	0.0472134	-0.030609	812	-0.606782	-0.218181	0.0537249	0.246283	0.203787	0.0716646	0.278691	0.230602	0.0810947
	816	4.068	4.426	9.279	10.668	14.52	7.959	27.305		63.322	816	-0.718263	-0.849665	-0.298904	-0.0647848	-0.511654	-0.108235	0.152888	0.0472134	-0.0299196	816	-0.622278	-0.228225	0.0567273	0.234868	0.201198	0.0749335	0.265773	0.227673	0.0847937
	820	3.875	4.348	8.962	10.561	14.465	7.845	27.328		63.345	820	-0.73163	-0.852315	-0.322856	-0.074165	-0.513504	-0.121008	0.153859	0.0472134	-0.0295672	820	-0.6356	-0.236226	0.0571685	0.226565	0.196996	0.0752136	0.256378	0.222917	0.0851107
	824	3.714	4.207	8.777	10.385	14.414	7.72	27.229		63.311	824	-0.74278	-0.857104	-0.336834	-0.0895941	-0.515219	-0.135014	0.149679	0.0472134	-0.0300881	824	-0.645573	-0.246609	0.0556015	0.223244	0.190839	0.0736289	0.25262	0.21595	0.0833175
	828	3.615	4.064	8.634	10.148	14.333	7.597	27.421		63.371	828	-0.749636	-0.861961	-0.347639	-0.110371	-0.517943	-0.148796	0.157786	0.0472134	-0.0291689	828	-0.653079	-0.259036	0.0586101	0.220793	0.183745	0.0767482	0.249846	0.207924	0.0868472
	832	3.517	3.973	8.404	9.956	14.192	7.475	27.489		63.326	832	-0.756424	-0.865052	-0.365017	-0.127203	-0.522685	-0.162465	0.160657	0.0472134	-0.0298583	832	-0.662164	-0.270784	0.0593374	0.214744	0.178702	0.0782486	0.243001	0.202216	0.088545
	836	3.408	3.879	8.11	9.82	14.007	7.348	27.373		63.316	836	-0.763973	-0.868245	-0.387231	-0.139125	-0.528907	-0.176695	0.155759	0.0472134	-0.0300115	836	-0.673149	-0.281576	0.0576537	0.206608	0.175561	0.076199	0.233795	0.198662	0.0862257
	840	3.315	3.813	7.82	9.665	13.853	7.23	27.248		63.237	840	-0.770413	-0.870487	-0.409142	-0.152713	-0.534087	-0.189916	0.150481	0.0472134	-0.0312218	840	-0.683348	-0.292239	0.055491	0.19815	0.171686	0.0744105	0.224223	0.194277	0.0842019
	844	3.217	3.755	7.627	9.443	13.734	7.095	27.19		63.15	844	-0.777201	-0.872457	-0.423725	-0.172175	-0.538089	-0.205042	0.148032	0.0472134	-0.0325546	844	-0.691127	-0.305102	0.0542304	0.19304	0.165292	0.0738911	0.218441	0.187042	0.0836141
	848	3.118	3.659	7.423	9.146	13.67	6.96	27.32		63.099	848	-0.784057	-0.875718	-0.439139	-0.198212	-0.540241	-0.220168	0.153521	0.0472134	-0.0333359	848	-0.699638	-0.31954	0.0557996	0.187963	0.156316	0.0765254	0.212696	0.176885	0.086595
	852	3.038	3.585	7.15	8.828	13.617	6.867	27.46		63.043	852	-0.789598	-0.878231	-0.459766	-0.226089	-0.542024	-0.230588	0.159433	0.0472134	-0.0341938	852	-0.709198	-0.3329	0.0574841	0.180049	0.147884	0.0793805	0.203741	0.167343	0.0898259
	856	2.991	3.565	6.928	8.573	13.55	6.805	27.52		62.905	856	-0.792853	-0.87891	-0.476539	-0.248444	-0.544277	-0.237535	0.161966	0.0472134	-0.0363079	856	-0.716101	-0.343419	0.0576238	0.173	0.142098	0.081279	0.195765	0.160796	0.0919741
	860	2.935	3.509	6.755	8.32	13.451	6.701	27.442		62.949	860	-0.796731	-0.880812	-0.489611	-0.270623	-0.547607	-0.249188	0.158673	0.0472134	-0.0356339	860	-0.722385	-0.355806	0.0567507	0.168137	0.135906	0.0796114	0.190262	0.153789	0.0900871
	864	2.875	3.453	6.569	7.983	13.464	6.61	27.265		63.088	864	-0.800886	-0.882715	-0.503665	-0.300167	-0.54717	-0.259384	0.151199	0.0472134	-0.0335044	864	-0.729089	-0.368907	0.0549694	0.162862	0.127146	0.0756041	0.184292	0.143876	0.0855525
	868	2.85	3.458	6.435	7.679	13.504	6.557	27.231		62.991	868	-0.802618	-0.882545	-0.513789	-0.326817	-0.545825	-0.265322	0.149764	0.0472134	-0.0349904	868	-0.732984	-0.379321	0.0539955	0.158392	0.120383	0.0755778	0.179234	0.136223	0.0855228
	872	2.802	3.414	6.348	7.423	13.418	6.477	27.318		62.836	872	-0.805942	-0.884039	-0.520363	-0.349259	-0.548717	-0.274286	0.153437	0.0472134	-0.037365	872	-0.736781	-0.390754	0.0544284	0.156317	0.115814	0.0780615	0.176886	0.131054	0.0883332
	876	2.749	3.356	6.214	7.179	13.371	6.404	27.189		62.742	876	-0.809613	-0.886009	-0.530487	-0.37065	-0.550298	-0.282465	0.14799	0.0472134	-0.0388051	876	-0.742037	-0.401137	0.0521329	0.152805	0.111447	0.0763381	0.172912	0.126112	0.0863832
	880	2.73	3.323	6.108	6.947	13.273	6.354	26.981		62.742	880	-0.810929	-0.88713	-0.538496	-0.390988	-0.553594	-0.288067	0.139208	0.0472134	-0.0388051	880	-0.745518	-0.410883	0.0492054	0.149656	0.10931	0.0726871	0.169348	0.123693	0.0822517
	884	2.693	3.283	6.01	6.711	13.165	6.251	26.928		62.609	884	-0.813491	-0.888489	-0.545901	-0.411677	-0.557226	-0.299608	0.13697	0.0472134	-0.0408426	884	-0.749294	-0.422837	0.0477803	0.147043	0.105468	0.0725928	0.166392	0.119346	0.082145
	888	2.672	3.274	5.872	6.523	12.975	6.158	26.881		62.562	888	-0.814946	-0.888795	-0.556328	-0.428158	-0.563616	-0.310028	0.134986	0.0472134	-0.0415626	888	-0.753356	-0.433934	0.0468788	0.142545	0.103607	0.0720759	0.161302	0.117241	0.0815601
	892	2.619	3.274	5.797	6.298	12.82	6.112	26.841		62.58	892	-0.818616	-0.888795	-0.561995	-0.447883	-0.568829	-0.315182	0.133297	0.0472134	-0.0412869	892	-0.756468	-0.443965	0.0464078	0.140467	0.103588	0.0712757	0.15895	0.117219	0.0806546
	896	2.555	3.242	5.706	6.037	12.812	6.047	26.778		62.468	896	-0.823049	-0.889881	-0.56887	-0.470764	-0.569098	-0.322465	0.130637	0.0472134	-0.0430027	896	-0.7606	-0.454109	0.0449492	0.138292	0.101374	0.0709061	0.156489	0.114713	0.0802363
	900	2.546	3.192	5.62	5.802	12.711	5.972	26.922		62.351	900	-0.823672	-0.89158	-0.575368	-0.491365	-0.572495	-0.330868	0.136717	0.0472134	-0.0447951	900	-0.76354	-0.46491	0.0463784	0.135915	0.100402	0.0741043	0.153799	0.113613	0.0838553
	904	2.555	3.186	5.541	5.649	12.611	5.955	27.16		62.248	904	-0.823049	-0.891784	-0.581337	-0.504778	-0.575858	-0.332773	0.146766	0.0472134	-0.046373	904	-0.76539	-0.471136	0.049202	0.133136	0.10205	0.0788611	0.150654	0.115479	0.0892381
	908	2.533	3.195	5.398	5.503	12.544	5.958	27.173		62.079	908	-0.824572	-0.891478	-0.592142	-0.517577	-0.578112	-0.332437	0.147315	0.0472134	-0.0489621	908	-0.769397	-0.476042	0.048522	0.12828	0.104508	0.080135	0.14516	0.11826	0.0906796
	912	2.55	3.17	5.342	5.3	12.535	5.91	27.242		62.013	912	-0.823395	-0.892327	-0.596373	-0.535373	-0.578415	-0.337815	0.150228	0.0472134	-0.0499732	912	-0.770698	-0.483868	0.0491561	0.126438	0.104759	0.0817433	0.143075	0.118544	0.0924996
	916	2.562	3.164	5.257	5.133	12.559	5.849	27.238		62.125	916	-0.822564	-0.892531	-0.602796	-0.550013	-0.577607	-0.34465	0.150059	0.0472134	-0.0482574	916	-0.77263	-0.490757	0.0496717	0.123441	0.103926	0.080981	0.139684	0.117601	0.091637
	920	2.518	3.146	5.139	4.967	12.516	5.814	27.071		62.092	920	-0.825611	-0.893142	-0.611711	-0.564566	-0.579054	-0.348571	0.143008	0.0472134	-0.0487629	920	-0.776822	-0.497397	0.0471528	0.119962	0.105402	0.0782901	0.135747	0.119271	0.088592
	924	2.504	3.04	5.097	4.862	12.483	5.839	27.052		61.972	924	-0.826581	-0.896743	-0.614885	-0.57377	-0.580163	-0.34577	0.142206	0.0472134	-0.0506013	924	-0.779403	-0.499901	0.0462726	0.119806	0.109018	0.0787159	0.135571	0.123364	0.0890738
	928	2.495	2.979	5.038	4.777	12.494	5.839	27.181		61.962	928	-0.827204	-0.898815	-0.619343	-0.581222	-0.579793	-0.34577	0.147652	0.0472134	-0.0507545	928	-0.781787	-0.502262	0.0480371	0.118528	0.110658	0.0810014	0.134124	0.125219	0.09166
	932	2.489	2.976	4.94	4.691	12.43	5.8	27.196		61.912	932	-0.82762	-0.898916	-0.626747	-0.588761	-0.581946	-0.35014	0.148286	0.0472134	-0.0515205	932	-0.784428	-0.506949	0.0479929	0.115234	0.110916	0.0815724	0.130397	0.125511	0.0923062
	936	2.486	2.951	4.868	4.604	12.35	5.784	27.156		61.872	936	-0.827827	-0.899766	-0.632187	-0.596388	-0.584637	-0.351933	0.146597	0.0472134	-0.0521333	936	-0.786593	-0.510986	0.0472257	0.113063	0.11257	0.0811312	0.12794	0.127382	0.091807
	940	2.473	2.939	4.808	4.509	12.312	5.808	27.171		61.832	940	-0.828728	-0.900173	-0.636721	-0.604716	-0.585915	-0.349244	0.14723	0.0472134	-0.0527461	940	-0.788541	-0.513292	0.0472325	0.111245	0.116253	0.08164	0.125883	0.13155	0.0923826
	944	2.472	2.966	4.739	4.432	12.295	5.82	27.195		61.901	944	-0.828797	-0.899256	-0.641934	-0.611467	-0.586486	-0.347899	0.148244	0.0472134	-0.051689	944	-0.789996	-0.515284	0.0479227	0.108575	0.118798	0.0816237	0.122862	0.13443	0.0923642
	948	2.456	2.967	4.654	4.328	12.33	5.777	27.231		61.864	948	-0.829905	-0.899222	-0.648357	-0.620584	-0.585309	-0.352717	0.149764	0.0472134	-0.0522558	948	-0.792495	-0.519537	0.0482404	0.105777	0.118835	0.0824773	0.119695	0.134472	0.0933301
	952	2.413	2.957	4.603	4.267	12.256	5.782	27.223		61.665	952	-0.832883	-0.899562	-0.65221	-0.625931	-0.587798	-0.352157	0.149426	0.0472134	-0.0553045	952	-0.794885	-0.521962	0.0471116	0.104494	0.121075	0.0835808	0.118244	0.137007	0.0945788
	956	2.414	2.977	4.581	4.294	12.202	5.808	27.184		61.664	956	-0.832814	-0.898883	-0.653872	-0.623564	-0.589614	-0.349244	0.147779	0.0472134	-0.0553198	956	-0.79519	-0.520807	0.0465576	0.103503	0.122103	0.0829161	0.117122	0.13817	0.0938266
	960	2.424	2.969	4.495	4.225	12.249	5.781	27.196		61.627	960	-0.832121	-0.899154	-0.66037	-0.629613	-0.588033	-0.352269	0.148286	0.0472134	-0.0558866	960	-0.797215	-0.523305	0.0465375	0.100559	0.122126	0.0833544	0.113792	0.138197	0.0943227
	964	2.417	2.936	4.431	4.126	12.254	5.755	27.235		61.575	964	-0.832606	-0.900275	-0.665206	-0.638292	-0.587865	-0.355182	0.149932	0.0472134	-0.0566833	964	-0.799362	-0.527113	0.0468209	0.0988037	0.123304	0.084351	0.111805	0.139529	0.0954503
	968	2.399	2.91	4.396	4.078	12.28	5.768	27.172		61.493	968	-0.833853	-0.901158	-0.66785	-0.6425	-0.586991	-0.353725	0.147272	0.0472134	-0.0579395	968	-0.800954	-0.527739	0.0455155	0.0980472	0.125115	0.083786	0.110949	0.141579	0.0948111
	972	2.39	2.858	4.343	4.014	12.257	5.782	27.154		61.504	972	-0.834476	-0.902924	-0.671855	-0.648111	-0.587764	-0.352157	0.146512	0.0472134	-0.057771	972	-0.803085	-0.529344	0.0453183	0.09691	0.127689	0.0834091	0.109662	0.144492	0.0943846
	976	2.416	2.842	4.29	4.018	12.172	5.757	27.337		61.561	976	-0.832675	-0.903468	-0.675859	-0.64776	-0.590623	-0.354958	0.154239	0.0472134	-0.0568977	976	-0.804001	-0.531114	0.0481849	0.0951072	0.126726	0.086199	0.107622	0.143402	0.0975416
	980	2.431	2.856	4.242	4.03	12.155	5.728	27.507		61.463	980	-0.831637	-0.902992	-0.679486	-0.646708	-0.591195	-0.358207	0.161417	0.0472134	-0.0583991	980	-0.804705	-0.532037	0.0500771	0.0932121	0.124988	0.0897624	0.105477	0.141435	0.101574
	984	2.476	2.833	4.197	3.999	12.15	5.729	27.484		61.346	984	-0.82852	-0.903774	-0.682886	-0.649426	-0.591363	-0.358095	0.160446	0.0472134	-0.0601915	984	-0.80506	-0.532961	0.0491559	0.09169	0.125901	0.0900853	0.103755	0.142467	0.101939
	988	2.49	2.833	4.207	3.993	12.168	5.708	27.323		61.171	988	-0.82755	-0.903774	-0.682131	-0.649952	-0.590758	-0.360448	0.153648	0.0472134	-0.0628725	988	-0.804485	-0.533719	0.0459963	0.0919435	0.124882	0.0883983	0.104042	0.141314	0.10003
	992	2.433	2.819	4.207	3.999	12.19	5.719	27.163		61.019	992	-0.831498	-0.904249	-0.682131	-0.649426	-0.590018	-0.359216	0.146892	0.0472134	-0.0652011	992	-0.805959	-0.532886	0.0429683	0.0924602	0.125176	0.0866388	0.104627	0.141647	0.0980393
	996	2.399	2.803	4.167	3.955	12.072	5.735	27.136		60.997	996	-0.833853	-0.904793	-0.685153	-0.653283	-0.593986	-0.357423	0.145752	0.0472134	-0.0655381	996	-0.807933	-0.534898	0.0424759	0.0915215	0.127807	0.086324	0.103564	0.144625	0.097683
	1000	2.384	2.8	4.188	3.887	11.977	5.727	27.157		61.008	1000	-0.834892	-0.904895	-0.683566	-0.659244	-0.597182	-0.358319	0.146639	0.0472134	-0.0653696	1000	-0.807784	-0.538248	0.0428276	0.0923676	0.129727	0.0866077	0.104522	0.146798	0.0980041
	1004	2.401	2.778	4.199	3.88	11.953	5.746	27.118		60.978	1004	-0.833714	-0.905642	-0.682735	-0.659858	-0.597989	-0.35619	0.144992	0.0472134	-0.0658292	1004	-0.807364	-0.538012	0.0421255	0.0928892	0.131025	0.0861427	0.105112	0.148266	0.0974779
	1008	2.405	2.781	4.112	3.912	11.945	5.734	27.203		60.969	1008	-0.833437	-0.90554	-0.689309	-0.657053	-0.598258	-0.357535	0.148581	0.0472134	-0.0659671	1008	-0.809429	-0.537615	0.0432759	0.0898936	0.129578	0.0876333	0.101722	0.146629	0.0991645
	1012	2.395	2.781	4.074	3.894	11.951	5.713	27.154		60.85	1012	-0.83413	-0.90554	-0.69218	-0.658631	-0.598056	-0.359888	0.146512	0.0472134	-0.0677901	1012	-0.810617	-0.538858	0.0419786	0.0886765	0.128945	0.0875669	0.100345	0.145912	0.0990895
	1016	2.402	2.761	4.092	3.845	11.962	5.733	26.988		60.849	1016	-0.833645	-0.906219	-0.69082	-0.662926	-0.597686	-0.357647	0.139503	0.0472134	-0.0678054	1016	-0.810228	-0.53942	0.0396371	0.0894818	0.131263	0.0848029	0.101256	0.148536	0.0959617
	1020	2.382	2.78	4.062	3.804	12.015	5.722	27.24		60.757	1020	-0.83503	-0.905574	-0.693087	-0.666521	-0.595904	-0.35888	0.150144	0.0472134	-0.0692149	1020	-0.81123	-0.540435	0.042714	0.088365	0.131576	0.0896092	0.0999925	0.148889	0.1014
	1024	2.375	2.786	3.998	3.771	12.065	5.694	27.39		60.5	1024	-0.835515	-0.90537	-0.697922	-0.669414	-0.594222	-0.362017	0.156477	0.0472134	-0.073152	1024	-0.812936	-0.541884	0.0435128	0.0861821	0.130837	0.0937822	0.0975224	0.148054	0.106123
	1028	2.416	2.771	3.971	3.766	12.048	5.727	27.191		60.38	1028	-0.832675	-0.90588	-0.699962	-0.669852	-0.594794	-0.358319	0.148075	0.0472134	-0.0749904	1028	-0.812839	-0.540988	0.0400992	0.0852275	0.132751	0.0912048	0.0964423	0.15022	0.103206
	1032		2.771	3.93	3.753	11.972	5.724	27.036		60.359	1032	-0.832675	-0.90588	-0.70306	-0.670991	-0.59735	-0.358655	0.14153	0.0472134	-0.0753121	1032	-0.813872	-0.542332	0.0378105	0.0838615	0.133313	0.0887748	0.0948965	0.150855	0.100456
	1036		2.769	3.874	3.736	11.971	5.681	27.108		60.377	1036	-0.832675	-0.905947	-0.707291	-0.672482	-0.597383	-0.363473	0.14457	0.0472134	-0.0750364	1036	-0.815305	-0.544446	0.0389157	0.0820259	0.131589	0.0898458	0.0928194	0.148904	0.101668
	1040		2.741	3.854	3.725	11.946	5.707	27.129		60.304	1040	-0.832675	-0.906899	-0.708802	-0.673446	-0.598224	-0.36056	0.145457	0.0472134	-0.0761547	1040	-0.816125	-0.544077	0.0388385	0.0817147	0.13335	0.0906662	0.0924672	0.150897	0.102597
	1044		2.72	3.861	3.716	11.901	5.695	27.033		60.247	1044	-0.832675	-0.907612	-0.708274	-0.674235	-0.599738	-0.361905	0.141403	0.0472134	-0.077028	1044	-0.816187	-0.545293	0.0371963	0.0822105	0.133194	0.0894551	0.0930282	0.15072	0.101226
	1048		2.707	3.887	3.725	11.911	5.66	27.331		60.338	1048	-0.832675	-0.908053	-0.706309	-0.673446	-0.599401	-0.365826	0.153986	0.0472134	-0.0756339	1048	-0.815679	-0.546225	0.0418551	0.083234	0.131094	0.0938184	0.0941864	0.148344	0.106164
	1052		2.717	3.915	3.704	11.876	5.694	27.371		60.358	1052	-0.832675	-0.907714	-0.704193	-0.675287	-0.600578	-0.362017	0.155675	0.0472134	-0.0753275	1052	-0.814861	-0.545961	0.0425202	0.0840363	0.133596	0.0943646	0.0950943	0.151175	0.106782
	1056		2.758	3.954	3.692	11.872	5.723	27.222		60.163	1056	-0.832675	-0.906321	-0.701247	-0.676339	-0.600713	-0.358768	0.149384	0.0472134	-0.0783148	1056	-0.813414	-0.545273	0.0394274	0.0848218	0.135445	0.0931204	0.0959832	0.153268	0.105374
	1060		2.766	3.929	3.668	11.87	5.723	27.323		60.037	1060	-0.832675	-0.906049	-0.703136	-0.678443	-0.60078	-0.358768	0.153648	0.0472134	-0.0802451	1060	-0.813953	-0.545997	0.0402054	0.0838903	0.136135	0.095615	0.0949291	0.154048	0.108197
	1064		2.754	3.855	3.664	11.792	5.745	27.431		60.104	1064	-0.832675	-0.906457	-0.708727	-0.678794	-0.603404	-0.356303	0.158208	0.0472134	-0.0792187	1064	-0.815953	-0.546167	0.0420676	0.0815844	0.137737	0.0969973	0.0923198	0.155861	0.109761
	1068			3.833	3.677	11.785	5.751	27.53		60.097	1068	-0.832675	-0.906457	-0.710389	-0.677654	-0.603639	-0.35563	0.162388	0.0472134	-0.0793259	1068	-0.816507	-0.545641	0.0434252	0.0808567	0.137714	0.0987157	0.0914963	0.155835	0.111705
	1072			3.827	3.649	11.798	5.71	27.456		59.936	1072	-0.832675	-0.906457	-0.710842	-0.680109	-0.603202	-0.360224	0.159264	0.0472134	-0.0817924	1072	-0.816658	-0.547845	0.0415615	0.0806584	0.136333	0.0984918	0.0912719	0.154272	0.111452
	1076			3.792	3.637	11.776	5.701	27.359		59.818	1076	-0.832675	-0.906457	-0.713487	-0.681161	-0.603942	-0.361232	0.155168	0.0472134	-0.0836002	1076	-0.81754	-0.548778	0.0395938	0.0795033	0.13631	0.0976255	0.0899648	0.154247	0.110472
	1080			3.726	3.623	11.729	5.713	27.335		59.733	1080	-0.832675	-0.906457	-0.718474	-0.682388	-0.605522	-0.359888	0.154155	0.0472134	-0.0849023	1080	-0.819202	-0.549266	0.0388219	0.0773329	0.137538	0.0977748	0.0875088	0.155636	0.110641
	1084			3.692	3.607	11.784	5.701	27.348		59.817	1084	-0.832675	-0.906457	-0.721043	-0.683791	-0.603673	-0.361232	0.154704	0.0472134	-0.0836155	1084	-0.820058	-0.549565	0.0394338	0.076219	0.137129	0.0974487	0.0862483	0.155174	0.110272
	1088			3.693	3.6	11.878	5.704	27.381		59.9	1088	-0.832675	-0.906457	-0.720967	-0.684404	-0.600511	-0.360896	0.156097	0.0472134	-0.0823439	1088	-0.820033	-0.548604	0.0403221	0.0762517	0.137077	0.097465	0.0862854	0.155114	0.11029
	1092			3.694	3.562	11.819	5.696	27.285		59.69	1092	-0.832675	-0.906457	-0.720892	-0.687736	-0.602496	-0.361793	0.152044	0.0472134	-0.0855611	1092	-0.820008	-0.550675	0.0378986	0.0762845	0.138019	0.0972251	0.0863224	0.15618	0.110018
	1096			3.707	3.553	11.758	5.685	27.173		59.532	1096	-0.832675	-0.906457	-0.719909	-0.688525	-0.604547	-0.363025	0.147315	0.0472134	-0.0879816	1096	-0.819681	-0.552032	0.0355155	0.0767101	0.137975	0.0964148	0.086804	0.156131	0.109102
	1100			3.658	3.556	11.802	5.671	27.101		59.398	1100	-0.832675	-0.906457	-0.723612	-0.688262	-0.603067	-0.364594	0.144275	0.0472134	-0.0900345	1100	-0.820915	-0.551974	0.0338179	0.0751081	0.136987	0.0961241	0.0849913	0.155012	0.108773
	1104			3.652	3.56	11.879	5.62	27.019		59.359	1104	-0.832675	-0.906457	-0.724065	-0.687911	-0.600478	-0.370308	0.140812	0.0472134	-0.0906319	1104	-0.821066	-0.552899	0.0324646	0.0749124	0.133954	0.0950605	0.0847698	0.151581	0.107569
	1108			3.711	3.591	11.88	5.635	27.183		59.352	1108	-0.832675	-0.906457	-0.719607	-0.685193	-0.600444	-0.368627	0.147737	0.0472134	-0.0907392	1108	-0.81958	-0.551422	0.034737	0.0768411	0.133806	0.0977563	0.0869523	0.151412	0.11062
	1112			3.705	3.642	11.815	5.676	27.364		59.154	1112	-0.832675	-0.906457	-0.72006	-0.680722	-0.60263	-0.364034	0.155379	0.0472134	-0.0937725	1112	-0.819731	-0.549129	0.0362734	0.0766446	0.134709	0.102009	0.0867299	0.152435	0.115432
	1116			3.702	3.668	11.782	5.685	27.342		59.171	1116	-0.832675	-0.906457	-0.720287	-0.678443	-0.60374	-0.363025	0.15445	0.0472134	-0.0935121	1116	-0.819806	-0.548403	0.0360505	0.0765463	0.134583	0.101537	0.0866187	0.152292	0.114898
	1120			3.702	3.628	11.78	5.707	27.272		59.14	1120	-0.832675	-0.906457	-0.720287	-0.68195	-0.603807	-0.36056	0.151495	0.0472134	-0.093987	1120	-0.819806	-0.548772	0.034907	0.0765463	0.136856	0.100595	0.0866187	0.154865	0.113831
	1124			3.689	3.6	11.82	5.706	27.266		58.95	1124	-0.832675	-0.906457	-0.721269	-0.684404	-0.602462	-0.360672	0.151241	0.0472134	-0.0968977	1124	-0.820134	-0.549179	0.0338523	0.0761209	0.137428	0.101742	0.0861373	0.155512	0.11513
	1128			3.691	3.608	11.877	5.667	27.326		58.929	1128	-0.832675	-0.906457	-0.721118	-0.683703	-0.600545	-0.365042	0.153775	0.0472134	-0.0972195	1128	-0.820084	-0.549763	0.0345896	0.0761863	0.134957	0.102856	0.0862113	0.152716	0.11639
	1132			3.707	3.632	11.843	5.635	27.135		58.776	1132	-0.832675	-0.906457	-0.719909	-0.681599	-0.601688	-0.368627	0.14571	0.0472134	-0.0995634	1132	-0.819681	-0.550638	0.0311201	0.0767101	0.132771	0.100777	0.086804	0.150242	0.114038
	1136			3.724	3.645	11.812	5.64	27.024		58.549	1136	-0.832675	-0.906457	-0.718625	-0.680459	-0.602731	-0.368067	0.141023	0.0472134	-0.103041	1136	-0.819252	-0.550419	0.0283986	0.0772673	0.13279	0.100523	0.0874346	0.150263	0.113751
	1140			3.701	3.662	11.799	5.657	27.03		58.479	1140	-0.832675	-0.906457	-0.720363	-0.678969	-0.603168	-0.366162	0.141277	0.0472134	-0.104113	1140	-0.819832	-0.549433	0.0281256	0.0765136	0.133236	0.101085	0.0865817	0.150767	0.114387
	1144			3.674	3.712	11.844	5.661	27.057		59.125	1144	#DIV/0!	#DIV/0!	-2.60234	-2.07301	-1.51039	-0.576577	0.124663	78.0451	-0.104017	1144
	1148			3.678	3.722	11.87	5.663	27.082		59.772	1148	#DIV/0!	#DIV/0!	-2.59842	-2.06475	-1.50489	-0.57602	0.125471	79.0451	-0.0920665	1148
	1152			3.669	3.686		5.665	27.112		59.674	1152	#DIV/0!	#DIV/0!	-2.60725	-2.09468	#DIV/0!	-0.575463	0.126438	80.0451	-0.09386	1152
	1156			3.651	3.68		5.666	27.331		59.64	1156	#DIV/0!	#DIV/0!	-2.62503	-2.09973	#DIV/0!	-0.575185	0.133438	81.0451	-0.0944836	1156
	1160			3.655	3.696		5.701	27.45		59.68	1160	#DIV/0!	#DIV/0!	-2.62107	-2.08631	#DIV/0!	-0.565515	0.137195	82.0451	-0.09375	1160
	1164			3.614	3.718		5.733	27.431		59.635	1164	#DIV/0!	#DIV/0!	-2.66215	-2.06805	#DIV/0!	-0.556777	0.136597	83.0451	-0.0945753	1164
	1168			3.596	3.698		5.727	27.364		59.572	1168	#DIV/0!	#DIV/0!	-2.68048	-2.08464	#DIV/0!	-0.558408	0.134483	84.0451	-0.0957329	1168
	1172			3.573	3.69		5.711	27.513		59.523	1172	#DIV/0!	#DIV/0!	-2.70417	-2.09133	#DIV/0!	-0.562774	0.139171	85.0451	-0.0966349	1172
	1176			3.534	3.706		5.704	27.532		59.32	1176	#DIV/0!	#DIV/0!	-2.74505	-2.07798	#DIV/0!	-0.564691	0.139765	86.0451	-0.100388	1176
	1180			3.547	3.717		5.684	27.422		59.201	1180	#DIV/0!	#DIV/0!	-2.73132	-2.06887	#DIV/0!	-0.570197	0.136314	87.0451	-0.1026	1180
	1184			3.581	3.731		5.659	27.418		59.191	1184	#DIV/0!	#DIV/0!	-2.6959	-2.05736	#DIV/0!	-0.577134	0.136188	88.0451	-0.102786	1184
	1188			3.59	3.74		5.675	27.543		59.162	1188	#DIV/0!	#DIV/0!	-2.68663	-2.05	#DIV/0!	-0.572687	0.140108	89.0451	-0.103326	1188
	1192			3.569	3.764		5.696	27.6		59.166	1192	#DIV/0!	#DIV/0!	-2.70832	-2.03055	#DIV/0!	-0.566889	0.141884	90.0451	-0.103252	1192
	1196			3.582	3.771		5.695	27.398		59.006	1196	#DIV/0!	#DIV/0!	-2.69486	-2.02493	#DIV/0!	-0.567164	0.135557	91.0451	-0.106243	1196
	1200			3.553	3.771		5.693	27.341		58.852	1200	#DIV/0!	#DIV/0!	-2.72502	-2.02493	#DIV/0!	-0.567715	0.133755	92.0451	-0.109138	1200
	1204			3.534			5.705	27.301		58.88	1204	#DIV/0!	#DIV/0!	-2.74505	#DIV/0!	#DIV/0!	-0.564417	0.132486	93.0451	-0.108611	1204
	1208			3.547			5.666	27.152		58.869	1208	#DIV/0!	#DIV/0!	-2.73132	#DIV/0!	#DIV/0!	-0.575185	0.127725	94.0451	-0.108818	1208
	1212			3.569			5.655	27.098		58.814	1212	#DIV/0!	#DIV/0!	-2.70832	#DIV/0!	#DIV/0!	-0.578249	0.125987	95.0451	-0.109855	1212
	1216			3.579			5.669	27.261		58.867	1216	#DIV/0!	#DIV/0!	-2.69796	#DIV/0!	#DIV/0!	-0.574352	0.131213	96.0451	-0.108856	1216
	1220			3.56			5.64	27.308		58.848	1220	#DIV/0!	#DIV/0!	-2.7177	#DIV/0!	#DIV/0!	-0.582447	0.132708	97.0451	-0.109214	1220
	1224			3.589			5.625	27.226		58.643	1224	#DIV/0!	#DIV/0!	-2.68766	#DIV/0!	#DIV/0!	-0.586667	0.130096	98.0451	-0.113091	1224
	1228			3.601				27.307		58.602	1228	#DIV/0!	#DIV/0!	-2.67537	#DIV/0!	#DIV/0!	#DIV/0!	0.132677	99.0451	-0.11387	1228
	1232			3.568				27.463		58.686	1232	#DIV/0!	#DIV/0!	-2.70936	#DIV/0!	#DIV/0!	#DIV/0!	0.137603	100.045	-0.112276	1232
	1236			3.547				27.65		58.503	1236	#DIV/0!	#DIV/0!	-2.73132	#DIV/0!	#DIV/0!	#DIV/0!	0.143436	101.045	-0.115755	1236
	1240			3.542				27.711		58.302	1240	#DIV/0!	#DIV/0!	-2.73659	#DIV/0!	#DIV/0!	#DIV/0!	0.145321	102.045	-0.119601	1240
	1244			3.541				27.587		58.236	1244	#DIV/0!	#DIV/0!	-2.73764	#DIV/0!	#DIV/0!	#DIV/0!	0.14148	103.045	-0.12087	1244
	1248			3.559				27.546		58.099	1248	#DIV/0!	#DIV/0!	-2.71874	#DIV/0!	#DIV/0!	#DIV/0!	0.140202	104.045	-0.123513	1248
	1252			3.525				27.529		57.866	1252	#DIV/0!	#DIV/0!	-2.75461	#DIV/0!	#DIV/0!	#DIV/0!	0.139671	105.045	-0.128037	1252
	1256			3.486				27.447		57.645	1256	#DIV/0!	#DIV/0!	-2.79662	#DIV/0!	#DIV/0!	#DIV/0!	0.137101	106.045	-0.132362	1256
	1260			3.529				27.404		57.621	1260	#DIV/0!	#DIV/0!	-2.75035	#DIV/0!	#DIV/0!	#DIV/0!	0.135747	107.045	-0.132834	1260
	1264			3.558				27.304		57.774	1264	#DIV/0!	#DIV/0!	-2.71979	#DIV/0!	#DIV/0!	#DIV/0!	0.132581	108.045	-0.129833	1264
	1268			3.558				27.176		57.678	1268	#DIV/0!	#DIV/0!	-2.71979	#DIV/0!	#DIV/0!	#DIV/0!	0.128496	109.045	-0.131714	1268
	1272			3.537				27.167		57.541	1272	#DIV/0!	#DIV/0!	-2.74187	#DIV/0!	#DIV/0!	#DIV/0!	0.128207	110.045	-0.134409	1272
	1276			3.546				27.389		57.565	1276	#DIV/0!	#DIV/0!	-2.73237	#DIV/0!	#DIV/0!	#DIV/0!	0.135273	111.045	-0.133936	1276
	1280			3.518				27.552		57.563	1280	#DIV/0!	#DIV/0!	-2.76208	#DIV/0!	#DIV/0!	#DIV/0!	0.140389	112.045	-0.133975	1280
	1284			3.457				27.524		57.482	1284	#DIV/0!	#DIV/0!	-2.82846	#DIV/0!	#DIV/0!	#DIV/0!	0.139515	113.045	-0.135573	1284
	1288			3.471				27.49		57.573	1288	#DIV/0!	#DIV/0!	-2.81302	#DIV/0!	#DIV/0!	#DIV/0!	0.13845	114.045	-0.133778	1288
	1292			3.484				27.453		57.645	1292	#DIV/0!	#DIV/0!	-2.79879	#DIV/0!	#DIV/0!	#DIV/0!	0.137289	115.045	-0.132362	1292
	1296			3.491				27.535		57.586	1296	#DIV/0!	#DIV/0!	-2.79118	#DIV/0!	#DIV/0!	#DIV/0!	0.139858	116.045	-0.133522	1296
	1300			3.478				27.548		57.58	1300	#DIV/0!	#DIV/0!	-2.80535	#DIV/0!	#DIV/0!	#DIV/0!	0.140264	117.045	-0.13364	1300
	1304			3.481				27.486		57.477	1304	#DIV/0!	#DIV/0!	-2.80207	#DIV/0!	#DIV/0!	#DIV/0!	0.138325	118.045	-0.135672	1304
	1308			3.478				27.644		57.372	1308	#DIV/0!	#DIV/0!	-2.80535	#DIV/0!	#DIV/0!	#DIV/0!	0.14325	119.045	-0.13775	1308
	1312			3.462				27.747		57.243	1312	#DIV/0!	#DIV/0!	-2.82293	#DIV/0!	#DIV/0!	#DIV/0!	0.14643	120.045	-0.140314	1312
	1316			3.474				27.697		57.126	1316	#DIV/0!	#DIV/0!	-2.80973	#DIV/0!	#DIV/0!	#DIV/0!	0.144889	121.045	-0.14265	1316
	1320			3.481				27.616		57.127	1320	#DIV/0!	#DIV/0!	-2.80207	#DIV/0!	#DIV/0!	#DIV/0!	0.142381	122.045	-0.14263	1320
	1324			3.486				27.499		57.235	1324	#DIV/0!	#DIV/0!	-2.79662	#DIV/0!	#DIV/0!	#DIV/0!	0.138732	123.045	-0.140473	1324
	1328			3.484				27.541		57.221	1328	#DIV/0!	#DIV/0!	-2.79879	#DIV/0!	#DIV/0!	#DIV/0!	0.140046	124.045	-0.140753	1328
	1332			3.483				27.554		57.175	1332	#DIV/0!	#DIV/0!	-2.79989	#DIV/0!	#DIV/0!	#DIV/0!	0.140451	125.045	-0.14167	1332
	1336			3.489				27.405		57.177	1336	#DIV/0!	#DIV/0!	-2.79335	#DIV/0!	#DIV/0!	#DIV/0!	0.135778	126.045	-0.14163	1336
	1340			3.506				27.29		57.119	1340	#DIV/0!	#DIV/0!	-2.77496	#DIV/0!	#DIV/0!	#DIV/0!	0.132136	127.045	-0.14279	1340
	1344			3.497				27.265		56.974	1344	#DIV/0!	#DIV/0!	-2.78467	#DIV/0!	#DIV/0!	#DIV/0!	0.131341	128.045	-0.145698	1344
	1348			3.469	6.606			27.228		56.864	1348	#DIV/0!	#DIV/0!	-2.81522	-0.726764	#DIV/0!	#DIV/0!	0.13016	129.045	-0.147914	1348
	1352			3.439	6.576			27.074		56.829	1352	#DIV/0!	#DIV/0!	-2.8485	-0.734641	#DIV/0!	#DIV/0!	0.125212	130.045	-0.148621	1352
	1356			3.399	6.577			27.222		56.824	1356	#DIV/0!	#DIV/0!	-2.89379	-0.734377	#DIV/0!	#DIV/0!	0.129968	131.045	-0.148722	1356
	1360			3.374	6.59			27.469		56.771	1360	#DIV/0!	#DIV/0!	-2.92264	-0.730956	#DIV/0!	#DIV/0!	0.137792	132.045	-0.149795	1360
	1364			3.406	6.609			27.362		56.562	1364	#DIV/0!	#DIV/0!	-2.88579	-0.72598	#DIV/0!	#DIV/0!	0.13442	133.045	-0.154043	1364
	1368			3.452	6.592			27.298		56.383	1368	#DIV/0!	#DIV/0!	-2.83401	-0.730431	#DIV/0!	#DIV/0!	0.132391	134.045	-0.157707	1368
	1372			3.461	6.537			27.346		56.403	1372	#DIV/0!	#DIV/0!	-2.82404	-0.74499	#DIV/0!	#DIV/0!	0.133914	135.045	-0.157297	1372
	1376			3.444	6.538			27.292		56.459	1376	#DIV/0!	#DIV/0!	-2.84292	-0.744723	#DIV/0!	#DIV/0!	0.1322	136.045	-0.156149	1376
	1380			3.406	6.591			27.241		56.428	1380	#DIV/0!	#DIV/0!	-2.88579	-0.730693	#DIV/0!	#DIV/0!	0.130575	137.045	-0.156784	1380
	1384			3.386	6.6			27.313		56.367	1384	#DIV/0!	#DIV/0!	-2.90874	-0.728333	#DIV/0!	#DIV/0!	0.132867	138.045	-0.158036	1384
	1388			3.36	6.576			27.296		56.372	1388	#DIV/0!	#DIV/0!	-2.93899	-0.734641	#DIV/0!	#DIV/0!	0.132327	139.045	-0.157933	1388
	1392			3.337	6.574			27.22		56.504	1392	#DIV/0!	#DIV/0!	-2.96614	-0.735169	#DIV/0!	#DIV/0!	0.129904	140.045	-0.155228	1392
	1396			3.35	6.57			27.324		56.528	1396	#DIV/0!	#DIV/0!	-2.95075	-0.736225	#DIV/0!	#DIV/0!	0.133216	141.045	-0.154737	1396
	1400			3.375	6.583			27.303		56.394	1400	#DIV/0!	#DIV/0!	-2.92148	-0.732797	#DIV/0!	#DIV/0!	0.13255	142.045	-0.157481	1400
	1404			3.409	6.593			27.12		56.375	1404	#DIV/0!	#DIV/0!	-2.88237	-0.730168	#DIV/0!	#DIV/0!	0.126696	143.045	-0.157871	1404
	1408			3.444	6.601			27.099		56.232	1408	#DIV/0!	#DIV/0!	-2.84292	-0.728072	#DIV/0!	#DIV/0!	0.126019	144.045	-0.160816	1408
	1412			3.463	6.591			27.291		56.085	1412										1412
	1416			3.479	6.589			27.358		56.077	1416										1416
	1420			3.5	6.621			27.412		55.873	1420										1420
	1424			3.472	6.628			27.431		55.694	1424										1424
	1428			3.431	6.599			27.296		55.678	1428										1428
	1432			3.426	6.569			27.301		55.635	1432										1432
	1436			3.426	6.602			27.354		55.695	1436										1436
	1440			3.414	6.607			27.399		55.854	1440										1440
	1444			3.387	6.572			27.315		55.816	1444										1444
	1448			3.365	6.579			27.351		55.697	1448										1448
	1452			3.324	6.586			27.506		55.582	1452										1452
	1456			3.346	6.568			27.528		55.453	1456										1456
	1460			3.4	6.565			27.621		55.68	1460										1460
	1464			3.417	6.599			27.712		55.813	1464										1464
	1468			3.452	6.624			27.619		55.511	1468										1468
	1472			3.465	6.619			27.401		55.166	1472										1472
	1476			3.456	6.6			27.363		54.884	1476										1476
	1480			3.442	6.606			27.408		54.796	1480										1480
	1484			3.444	6.623			27.475		54.755	1484										1484
	1488			3.426	6.61			27.533		54.804	1488										1488
	1492			3.398	6.626			27.64		54.987	1492										1492
	1496			3.42	6.641			27.786		55.111	1496										1496
	1500			3.422	6.6			27.632		54.991	1500										1500
	1504			3.436	6.598			27.452		54.858	1504										1504
	1508			3.404	6.596			27.593		54.767	1508										1508
	1512			3.325	6.587			27.87		54.625	1512										1512
	1516			3.328	6.604			27.89		54.569	1516										1516
	1520			3.345	6.583			27.771		54.444	1520										1520
	1524			3.333	6.541			27.762		54.384	1524										1524
	1528			3.35	6.542			27.793		54.407	1528										1528
	1532			3.348	6.554			27.56		54.344	1532										1532
	1536			3.33	6.527			27.38		54.352	1536										1536
	1540			3.35	6.535			27.389		54.207	1540										1540
	1544			3.347	6.545			27.371		53.997	1544										1544
	1548			3.334	6.513			27.391		53.863	1548										1548
	1552			3.329	6.527			27.445		53.729	1552										1552
	1556			3.357	6.512			27.653		53.522	1556										1556
	1560			3.378	6.477			27.595		53.35	1560										1560
	1564			3.366	6.502			27.518		53.497	1564										1564
	1568			3.356	6.516			27.613		53.626	1568										1568
	1572			3.354	6.507			27.587		53.544	1572										1572
	1576			3.349	6.506			27.679		53.382	1576										1576
	1580			3.325	6.506			27.718		53.379	1580										1580
	1584			3.336	6.487			27.59		53.305	1584										1584
	1588			3.307	6.444			27.615		53.195	1588										1588
	1592			3.231	6.384			27.649		53.366	1592										1592
	1596			3.216	6.36			27.52		53.374	1596										1596
	1600				6.375			27.508		53.14	1600										1600
	1604				6.401			27.584		52.955	1604										1604
	1608				6.418			27.57		52.781	1608										1608
	1612				6.4			27.496		52.672	1612										1612
	1616				6.374			27.54		52.431	1616										1616
	1620				6.388			27.408		52.233	1620										1620
	1624				6.383			27.275		52.182	1624										1624
	1628				6.384			27.462		52.226	1628										1628
	1632				6.403			27.497		52.346	1632										1632
	1636				6.376			27.428		52.167	1636										1636
	1640				6.33			27.29		51.947	1640										1640
	1644				6.303			27.145		51.843	1644										1644
	1648				6.303			27.151		51.547	1648										1648
	1652				6.306			27.165		51.32	1652										1652
	1656				6.329			27.303		51.414	1656										1656
	1660				6.329			27.212		51.394	1660										1660
	1664				6.341			27.094		51.177	1664										1664
	1668				6.319			27.142		51.19	1668										1668
	1672				6.285			27.046		51.349	1672										1672
	1676				6.292			27.151		51.263	1676										1676
	1680				6.291			27.184		51.114	1680										1680
	1684				6.291			27.186		51.042	1684										1684
	1688				6.275			27.313		51.148	1688										1688
	1692				6.26			27.376		51.224	1692										1692
	1696				6.273			27.316		51.039	1696										1696
	1700				6.262			27.261		50.888	1700										1700
	1704				6.248			27.247		50.746	1704										1704
	1708				6.236			27.319		50.608	1708										1708
	1712				6.233			27.538		50.563	1712										1712
	1716				6.269			27.6		50.586	1716										1716
	1720				6.261			27.484		50.696	1720										1720
	1724				6.227			27.308		50.735	1724										1724
	1728				6.247			27.134		50.664	1728										1728
	1732				6.267			27.072		50.732	1732										1732
	1736				6.257			27.192		50.664	1736										1736
	1740				6.274			27.366		50.582	1740										1740
	1744				6.28			27.446		50.565	1744										1744
	1748				6.266			27.402		50.966	1748										1748
	1752				6.227			27.394		51.415	1752										1752
	1756				6.208			27.487		51.578	1756										1756
	1760				6.197			27.446		51.713	1760										1760
	1764				6.177			27.416		51.505	1764										1764
	1768				6.191			27.444		51.276	1768										1768
	1772				6.213			27.383		51.165	1772										1772
	1776				6.213			27.256		51.289	1776										1776
	1780				6.207			27.392		51.389	1780										1780
	1784				6.181			27.488		51.257	1784										1784
	1788				6.134			27.349		51.118	1788										1788
	1792				6.144			27.359		51.015	1792										1792
	1796				6.185			27.512		50.991	1796										1796
	1800										1800										1800
	1804										1804										1804
	1808										1808										1808
	1812										1812										1812
	1816										1816										1816
	1820										1820										1820
	1824										1824										1824
	1828										1828										1828
	1832										1832										1832
	1836										1836										1836
	1840										1840										1840
	1844										1844										1844
	1848										1848										1848
	1852										1852										1852
	1856										1856										1856
	1860										1860										1860
	1864										1864										1864
	1868										1868										1868
	1872										1872										1872
	1876										1876										1876
	1880										1880										1880
	1884										1884										1884
	1888										1888										1888
	1892										1892										1892
	1896										1896										1896
	1900										1900										1900
	1904										1904										1904
	1908										1908										1908
	1912										1912										1912
	1916										1916										1916
	1920										1920										1920
	1924										1924										1924
	1928										1928										1928
	1932										1932										1932
	1936										1936										1936
	1940										1940										1940
	1944										1944										1944
	1948										1948										1948
	1952										1952										1952
	1956										1956										1956
	1960										1960										1960
	1964										1964										1964
	1968										1968										1968
	1972										1972										1972
	1976										1976										1976
	1980										1980										1980
	1984										1984										1984
	1988										1988										1988
	1992										1992										1992
	1996										1996										1996
	2000										2000										2000
	2004										2004										2004
	2008										2008										2008
	2012										2012										2012
	2016										2016										2016
	2020										2020										2020
	2024										2024										2024
	2028										2028										2028
	2032										2032										2032
	2036										2036										2036
	2040										2040										2040
	2044										2044										2044
	2048										2048										2048
	2052										2052										2052
	2056										2056										2056
	2060										2060										2060
	2064										2064										2064
	2068										2068										2068
	2072										2072										2072
	2076										2076										2076
	2080										2080										2080
	2084										2084										2084
	2088										2088										2088
	2092										2092										2092
	2096										2096										2096
	2100										2100										2100
	2104										2104										2104
	2108										2108										2108
	2112										2112										2112
	2116										2116										2116
	2120										2120										2120
	2124										2124										2124
	2128										2128										2128
	2132										2132										2132
	2136										2136										2136
	2140										2140										2140
	2144										2144										2144
	2148										2148										2148
	2152										2152										2152
	2156										2156										2156
	2160										2160										2160
	2164										2164										2164
	2168										2168										2168
	2172										2172										2172
	2176										2176										2176
	2180										2180										2180
	2184										2184										2184
	2188										2188										2188
	2192										2192										2192
	2196										2196										2196
	2200										2200										2200
	2204										2204										2204
	2208										2208										2208
	2212										2212										2212
	2216										2216										2216
	2220										2220										2220
	2224										2224										2224
	2228										2228										2228
	2232										2232										2232
	2236										2236										2236
	2240										2240										2240
	2244										2244										2244
	2248										2248										2248
	2252										2252										2252
	2256										2256										2256
	2260										2260										2260
	2264										2264										2264
	2268										2268										2268
	2272										2272										2272
	2276										2276										2276
	2280										2280										2280
	2284										2284										2284
	2288										2288										2288
	2292										2292										2292
	2296										2296										2296
	2300										2300										2300
	2304										2304										2304
	2308										2308										2308
	2312										2312										2312
	2316										2316										2316
	2320										2320										2320
	2324										2324										2324
	2328										2328										2328
	2332										2332										2332
	2336										2336										2336
	2340										2340										2340
	2344										2344										2344
	2348										2348										2348
	2352										2352										2352
	2356										2356										2356
	2360										2360										2360
	2364										2364										2364
	2368										2368										2368
	2372										2372										2372
	2376										2376										2376
	2380										2380										2380
	2384										2384										2384
	2388										2388										2388
	2392										2392										2392
	2396										2396										2396
	2400										2400										2400
	2404										2404										2404
	2408										2408										2408
	2412										2412										2412
	2416										2416										2416
	2420										2420										2420
	2424										2424										2424
	2428										2428										2428
	2432										2432										2432
	2436										2436										2436
	2440										2440										2440
	2444										2444										2444
	2448										2448										2448
	2452										2452										2452
	2456										2456										2456
	2460										2460										2460
	2464										2464										2464
	2468										2468										2468
	2472										2472										2472
	2476										2476										2476
	2480										2480										2480
	2484										2484										2484
	2488										2488										2488
	2492										2492										2492
	2496										2496										2496
	2500										2500										2500
	2504										2504										2504
	2508										2508										2508
	2512										2512										2512
	2516										2516										2516
	2520										2520										2520
	2524										2524										2524
	2528										2528										2528
	2532										2532										2532
	2536										2536										2536
	2540										2540										2540
	2544										2544										2544
	2548										2548										2548
	2552										2552										2552
	2556										2556										2556
	2560										2560										2560
	2564										2564										2564
	2568										2568										2568
	2572										2572										2572
	2576										2576										2576
	2580										2580										2580
	2584										2584										2584
	2588										2588										2588
	2592										2592										2592
	2596										2596										2596
	2600										2600										2600
	2604										2604										2604
	2608										2608										2608
	2612										2612										2612
	2616										2616										2616
	2620										2620										2620
	2624										2624										2624
	2628										2628										2628
	2632										2632										2632
	2636										2636										2636
	2640										2640										2640
	2644										2644										2644
	2648										2648										2648
	2652										2652										2652
	2656										2656										2656
	2660										2660										2660
	2664										2664										2664
	2668										2668										2668
	2672										2672										2672
	2676										2676										2676
	2680										2680										2680
	2684										2684										2684
	2688										2688										2688
	2692										2692										2692
	2696										2696										2696
	2700										2700										2700
	2704										2704										2704
	2708										2708										2708
	2712										2712										2712
	2716										2716										2716
	2720										2720										2720
	2724										2724										2724
	2728										2728										2728
	2732										2732										2732
	2736										2736										2736
	2740										2740										2740
	2744										2744										2744
	2748										2748										2748
	2752										2752										2752
	2756										2756										2756
	2760										2760										2760
	2764										2764										2764
	2768										2768										2768
	2772										2772										2772
	2776										2776										2776
	2780										2780										2780
	2784										2784										2784
	2788										2788										2788
	2792										2792										2792
	2796										2796										2796
	2800										2800										2800
	2804										2804										2804
	2808										2808										2808
	2812										2812										2812
	2816										2816										2816
	2820										2820										2820
	2824										2824										2824
	2828										2828										2828
	2832										2832										2832
	2836										2836										2836
	2840										2840										2840
	2844										2844										2844
	2848										2848										2848
	2852										2852										2852
	2856										2856										2856
	2860										2860										2860
	2864										2864										2864
	2868										2868										2868
	2872										2872										2872
	2876										2876										2876
	2880										2880										2880
	2884										2884										2884
	2888										2888										2888
	2892										2892										2892
	2896										2896										2896
	2900										2900										2900
	2904										2904										2904
	2908										2908										2908
	2912										2912										2912
	2916										2916										2916
	2920										2920										2920
	2924										2924										2924
	2928										2928										2928
	2932										2932										2932
	2936										2936										2936
	2940										2940										2940
	2944										2944										2944
	2948										2948										2948
	2952										2952										2952
	2956										2956										2956
	2960										2960										2960
	2964										2964										2964
	2968										2968										2968
	2972										2972										2972
	2976										2976										2976
	2980										2980										2980
	2984										2984										2984
	2988										2988										2988
	2992										2992										2992
	2996										2996										2996
	3000										3000										3000
	3004										3004										3004
	3008										3008										3008
	3012										3012										3012
	3016										3016										3016
	3020										3020										3020
	3024										3024										3024
	3028										3028										3028
	3032										3032										3032
	3036										3036										3036
	3040										3040										3040
	3044										3044										3044
	3048										3048										3048
	3052										3052										3052
	3056										3056										3056
	3060										3060										3060
	3064										3064										3064
	3068										3068										3068
	3072										3072										3072
	3076										3076										3076
	3080										3080										3080
	3084										3084										3084
	3088										3088										3088
	3092										3092										3092
	3096										3096										3096
	3100										3100										3100
	3104										3104										3104
	3108										3108										3108
	3112										3112										3112
	3116										3116										3116
	3120										3120										3120
	3124										3124										3124
	3128										3128										3128
	3132										3132										3132
	3136										3136										3136
	3140										3140										3140
	3144										3144										3144
	3148										3148										3148
	3152										3152										3152
	3156										3156										3156
	3160										3160										3160
	3164										3164										3164
	3168										3168										3168
	3172										3172										3172
	3176										3176										3176
	3180										3180										3180
	3184										3184										3184
	3188										3188										3188
	3192										3192										3192
	3196										3196										3196
	3200										3200										3200
	3204										3204										3204
	3208										3208										3208
	3212										3212										3212
	3216										3216										3216
	3220										3220										3220
	3224										3224										3224
	3228										3228										3228
	3232										3232										3232
	3236										3236										3236
	3240										3240										3240
	3244										3244										3244
	3248										3248										3248
	3252										3252										3252
	3256										3256										3256
	3260										3260										3260
	3264										3264										3264
	3268										3268										3268
	3272										3272										3272
	3276										3276										3276
	3280										3280										3280
	3284										3284										3284
	3288										3288										3288
	3292										3292										3292
	3296										3296										3296
	3300										3300										3300
	3304										3304										3304
	3308										3308										3308
	3312										3312										3312
	3316										3316										3316
	3320										3320										3320
	3324										3324										3324
	3328										3328										3328
	3332										3332										3332
	3336										3336										3336
	3340										3340										3340
	3344										3344										3344
	3348										3348										3348
	3352										3352										3352
	3356										3356										3356
	3360										3360										3360
	3364										3364										3364
	3368										3368										3368
	3372										3372										3372
	3376										3376										3376
	3380										3380										3380
	3384										3384										3384
	3388										3388										3388
	3392										3392										3392
	3396										3396										3396
	3400										3400										3400
	3404										3404										3404
	3408										3408										3408
	3412										3412										3412
	3416										3416										3416
	3420										3420										3420
	3424										3424										3424
	3428										3428										3428
	3432										3432										3432
	3436										3436										3436
	3440										3440										3440
	3444										3444										3444
	3448										3448										3448
	3452										3452										3452
	3456										3456										3456
	3460										3460										3460
	3464										3464										3464
	3468										3468										3468
	3472										3472										3472
	3476										3476										3476
	3480										3480										3480
	3484										3484										3484
	3488										3488										3488
	3492										3492										3492
	3496										3496										3496
	3500										3500										3500
	3504										3504										3504
	3508										3508										3508
	3512										3512										3512
	3516										3516										3516
	3520										3520										3520
	3524										3524										3524
	3528										3528										3528
	3532										3532										3532
	3536										3536										3536
	3540										3540										3540
	3544										3544										3544

## Sheet: Figure 3B
	Seconds	Acute Dopamine	Acute Dopamine	Acute Dopamine	ROS Inhibitor	ROS Inhibitor	ROS Inhibitor	D1/D2 Antagonists	D1/D2 Antagonists	D1/D2 Antagonists
	0	33.576	46.6	41.583	31.845	54.728	23.362	14.841	74.506	21.693
	4	33.818	46.603	41.635	31.901	54.657	23.583	14.877	74.54	21.725
	8	33.956	46.65	41.737	31.95	54.675	23.592	14.922	74.671	21.803
	12	34.07	46.686	41.829	31.949	54.659	23.561	14.934	74.912	21.882
	16	34.169	46.75	41.877	31.913	54.619	23.539	14.948	74.862	21.954
	20	34.248	46.839	41.938	31.958	54.617	23.527	14.972	74.683	21.958
	24	34.296	46.862	41.861	31.98	54.579	23.596	15.003	74.712	21.95
	28	34.333	46.917	41.791	32.074	54.572	23.647	15.039	74.988	21.897
	32	34.395	46.908	41.781	32.141	54.625	23.68	15.072	74.936	21.824
	36	34.446	46.872	41.694	32.196	54.678	23.696	15.088	74.609	21.763
	40	34.491	46.871	41.703	32.243	54.696	23.74	15.043	74.722	21.7
	44	34.533	46.819	41.763	32.208	54.748	23.853	15.034	74.802	21.721
	48	34.577	46.771	41.848	32.198	54.737	23.959	15.103	74.678	21.738
	52	34.625	46.75	42.043	32.217	54.696	24.004	15.127	74.705	21.729
	56	34.659	46.762	42.171	32.192	54.665	24.024	15.081	74.818	21.74
	60	34.666	46.783	42.302	32.22	54.531	24.05	15.078	74.934	21.717
	64	34.66	46.797	42.415	32.189	54.474	24.031	15.144	74.908	21.703
	68	34.636	46.861	42.436	32.156	54.539	24.029	15.131	74.96	21.717
	72	34.641	46.874	42.543	32.161	54.673	24.09	15.151	75.314	21.715
	76	34.664	46.94	42.578	32.16	54.822	23.995	15.187	75.332	21.709
	80	34.674	47.009	42.596	32.26	54.932	23.933	15.163	75.067	21.757
	84	34.724	47.047	42.65	32.345	55.02	23.796	15.162	75.143	21.832
	88	34.728	47.08	42.687	32.459	55.096	23.613	15.108	75.35	21.889
	92	34.682	47.054	42.77	32.552	55.246	23.512	15.121	75.595	21.927
	96	34.673	47.002	42.824	32.622	55.412	23.404	15.235	75.355	21.946
	100	34.654	46.936	42.85	32.716	55.553	23.501	15.308	75.107	21.941
	104	34.695	46.905	42.792	32.733	55.627	23.588	15.261	75.193	21.93
	108	34.728	46.882	42.735	32.686	55.696	23.644	15.168	75.283	21.881
	112	34.709	46.835	42.734	32.671	55.667	23.812	15.17	75.164	21.802
	116	34.699	46.795	42.757	32.644	55.682	23.861	15.212	74.921	21.723
	120	34.703	46.776	42.868	32.702	55.71	23.854	15.238	75.022	21.677
	124	34.699	46.748	42.948	32.8	55.748	23.944	15.282	74.962	21.696
	128	34.725	46.78	42.964	32.858	55.889	23.993	15.308	74.681	21.672
	132	34.692	46.784	42.959	32.918	55.91	24.065	15.322	74.795	21.645
	136	34.675	46.746	42.482	32.985	55.92	24.206	15.289	74.99	21.58
	140	34.678	46.669	41.114	33.008	55.796	24.377	15.258	74.989	21.515
	144	34.694	46.546	39.004	33.031	55.6	24.512	15.287	74.963	21.442
	148	34.75	46.493	36.149	33.019	55.522	24.645	15.292	74.834	21.368
	152	34.744	46.426	33.07	32.986	55.434	24.699	15.266	74.768	21.269
	156	34.754	46.455	30.349	33.018	55.516	24.742	15.274	74.757	21.142
	160	34.719	46.485	28.003	33.054	55.549	24.74	15.288	74.931	21.036
	164	34.702	46.475	26.133	33.109	55.461	24.719	15.288	75.121	20.87
	168	34.641	46.512	24.644	33.19	55.423	24.819	15.27	74.915	20.697
	172	34.639	46.525	23.467	33.267	55.366	24.888	15.249	74.812	20.526
	176	34.614	46.531	22.54	33.281	55.41	24.991	15.22	74.856	20.357
	180	34.544	46.545	21.761	33.379	55.522	25.101	15.24	74.688	20.232
	184	34.543	46.559	21.082	33.473	55.698	25.198	15.246	74.672	20.136
	188	34.513	46.522	20.535	33.572	55.804	25.227	15.258	74.667	20.032
	192	34.528	46.509	20.081	33.631	55.889	25.281	15.315	74.528	19.942
	196	34.543	46.456	19.691	33.633	55.905	25.343	15.319	74.492	19.853
	200	34.519	46.41	19.441	33.521	55.813	25.395	15.329	74.454	19.726
	204	34.425	46.39	19.238	33.335	55.625	25.497	15.287	74.562	19.57
	208	34.304	46.397	19.048	33.314	55.353	25.608	15.262	74.52	19.364
	212	34.196	46.424	18.891	33.263	55.11	25.668	15.308	74.492	19.109
	216	34.144	46.385	18.768	33.268	54.756	25.74	15.307	75.517	18.803
	220	34.112	46.365	18.658	33.379	54.438	25.872	15.268	76.825	18.403
	224	34.162	46.334	18.553	33.357	54.167	25.868	15.273	77.129	17.936
	228	34.216	46.315	18.561	33.3	53.881	25.897	15.311	77.25	17.373
	232	34.252	46.326	18.518	33.186	53.8	25.839	15.29	77.271	16.764
	236	34.291	46.295	18.507	32.988	53.7	25.571	15.289	77.058	16.082
	240	34.298	46.255	18.571	32.632	53.489	25.392	15.326	77.115	15.332
	244	34.306	46.249	18.59	32.25	53.278	25.158	15.348	77.173	14.534
	248	34.308	46.217	18.706	31.853	52.939	25.007	15.335	77.343	13.685
	252	34.33	46.214	18.83	31.44	52.494	24.953	15.274	77.235	12.884
	256	34.357	46.223	18.964	31.112	51.911	24.86	15.288	77.071	12.152
	260	34.4	46.187	19.161	30.734	51.137	24.772	15.351	77.127	11.516
	264	34.342	46.165	19.383	30.373	50.22	24.676	15.323	77.188	10.995
	268	34.263	46.119	19.719	30.003	49.271	24.622	15.264	77.291	10.545
	272	34.083	46.05	20.127	29.673	48.432	24.607	15.262	77.224	10.125
	276	33.938	46	20.525	29.425	47.7	24.63	15.276	77.162	9.768
	280	33.87	45.9	20.929	29.113	47.106	24.587	15.309	76.835	9.471
	284	33.699	45.807	21.286	28.716	46.73	24.565	15.359	76.886	9.23
	288	33.545	45.664	21.614	28.374	46.445	24.564	15.363	77.158	9.058
	292	33.264	45.493	21.917	27.983	46.349	24.59	15.329	77.053	8.893
	296	32.795	45.338	22.185	27.693	46.328	24.61	15.329	76.929	8.743
	300	32.283	45.033	22.425	27.529	46.32	24.626	15.306	76.921	8.608
	304	31.585	44.643	22.658	27.331	46.447	24.637	15.297	76.85	8.498
	308	30.759	44.141	22.885	27.152	46.535	24.556	15.347	76.757	8.437
	312	29.911	43.511	23.084	27.016	46.666	24.472	15.332	76.943	8.384
	316	28.973	42.849	23.256	26.877	46.962	24.428	15.314	76.783	8.339
	320	28.085	42.091	23.347	26.719	47.324	24.417	15.32	76.298	8.297
	324	27.177	41.16	23.332	26.616	47.694	24.507	15.322	76.015	8.246
	328	26.201	40.1	23.268	26.491	48.167	24.682	15.356	76.138	8.206
	332	25.217	38.867	23.132	26.401	48.563	24.778	15.364	76.304	8.171
	336	24.128	37.469	22.891	26.316	48.999	24.863	15.394	76.292	8.139
	340	22.959	35.892	22.595	26.224	49.512	24.887	15.41	76.362	8.114
	344	21.791	34.148	22.22	26.11	49.998	24.836	15.327	76.411	8.094
	348	20.606	32.323	21.802	25.981	50.545	24.804	15.277	76.143	8.071
	352	19.403	30.478	21.358	25.942	50.923	24.727	15.319	76.093	8.041
	356	18.281	28.747	20.933	25.923	51.285	24.715	15.352	76.224	8.004
	360	17.204	27.181	20.558	25.912	51.48	24.707	15.328	76.071	7.971
	364	16.27	25.821	20.224	25.919	51.714	24.683	15.359	76.192	7.944
	368	15.438	24.63	19.941	25.893	51.978	24.686	15.38	76.301	7.924
	372	14.742	23.626	19.715	25.886	52.202	24.629	15.353	76.219	7.916
	376	14.207	22.794	19.539	25.979	52.415	24.563	15.336	76.249
	380	13.682	22.101	19.363	26.06	52.551	24.594	15.315	76.244
	384	13.32	21.567	19.271	26.139	52.687	24.6	15.313	76.216
	388	13.012	21.148	19.184	26.228	52.864	24.566	15.311	76.209
	392	12.725	20.811	19.105	26.228	53.077	24.567	15.283	76.11
	396	12.561	20.526	19.052	26.265	53.242	24.512	15.278	75.989
	400	12.418	20.306	18.98		53.358	24.495	15.306	75.93
	404	12.298	20.133	18.936		53.405	24.575	15.283	75.857
	408	12.182	20	18.867		53.427	24.615	15.297	75.827
	412	12.061	19.899	18.814			24.659	15.315	75.85
	416	11.953	19.807	18.755			24.714	15.324	75.848
	420	11.863	19.722	18.69			24.68	15.3	75.747
	424	11.831	19.628	18.688			24.603	15.275	75.639
	428	11.79	19.568	18.718			24.551	15.327	75.461
	432	11.765	19.528	18.755			24.465	15.311	75.249
	436	11.737	19.48	18.794				15.3	75.344
	440	11.697	19.486	18.791				15.347	75.568
	444	11.646	19.463	18.751				15.322	75.43
	448	11.592	19.425	18.74				15.312	75.249
	452	11.527	19.419	18.721				15.368	75.188
	456	11.478	19.41	18.72				15.372	74.935
	460	11.458	19.42	18.752				15.363	74.993
	464	11.448	19.457	18.767				15.352	75.166
	468	11.431	19.475	18.798				15.345	74.906
	472	11.405		18.821				15.365	74.739
	476	11.401		18.813				15.379	74.778
	480	11.361		18.805				15.379	74.75
	484	11.353		18.807				15.362	74.718
	488	11.35		18.786				15.355	74.692
	492	11.312		18.769				15.339	74.765
	496	11.316		18.772				15.326	74.777
	500	11.3		18.764				15.318	74.585
	504	11.281		18.743				15.282	74.58
	508	11.282		18.718				15.305	74.555
	512	11.263		18.684				15.349	74.456
	516	11.244		18.652				15.336	74.406
	520	11.2		18.675				15.305	74.327
	524	11.18		18.716				15.305	74.236
	528	11.179		18.72				15.317	74.181
	532	11.194		18.707				15.332	74.084
	536	11.204		18.646				15.346	73.916
	540	11.227		18.581				15.317	73.701
	544							15.296	73.598
	548							15.266	73.804
	552							15.272	73.856
	556							15.344	73.868
	560							15.362	73.914
	564							15.326	73.723
	568							15.322	73.343
	572							15.326	73.119
	576							15.299	72.829
	580							15.274	72.508
	584							15.275	72.506
	588							15.274	72.418
	592							15.278	72.314
	596							15.312	71.879
	600							15.299	71.216
	604							15.285	70.744
	608							15.335	70.387
	612							15.354	70.118
	616							15.319	69.589
	620							15.333	68.867
	624							15.339	68.28
	628							15.305	67.819
	632							15.287	67.179
	636							15.264	66.164
	640							15.266	65.124
	644							15.301	63.967
	648							15.289	62.699
	652							15.26	61.55
	656							15.199	60.317
	660							15.14	58.812
	664							15.143	57.621
	668							15.116	56.401
	672							15.109	54.873
	676							15.09	53.475
	680							15.056	52.019
	684							15.014	50.871
	688							14.944	49.678
	692							14.86	48.367
	696							14.801	47.328
	700							14.779	46.258
	704							14.752	45.304
	708							14.709	44.371
	712							14.64	43.44
	716							14.551	42.81
	720							14.398	42.127
	724							14.276	41.436
	728							14.177	40.882
	732							14.022	40.298
	736							13.825	39.65
	740							13.642	39.127
	744							13.465	38.782
	748							13.262	38.349
	752							13.03	37.924
	756							12.752	37.758
	760							12.562	37.643
	764							12.362	37.385
	768							12.152	37.216
	772							11.928	37.12
	776							11.683	36.956
	780							11.52	36.807
	784							11.319	36.569
	788							11.092	36.462
	792							10.886	36.466
	796							10.742	36.194
	800							10.615	35.891
	804							10.412	35.621
	808							10.229	35.502
	812							10.092	35.572
	816							9.95	35.355
	820							9.808	35.048
	824							9.671	34.868
	828							9.537	34.649
	832							9.478	34.484
	836							9.419	34.31
	840							9.296	34.087
	844							9.212	33.858
	848							9.162	33.51
	852							9.12	33.26
	856							9.059	33.188
	860							8.969	33.184
	864							8.912	33.175
	868							8.873	33.15
	872							8.818	32.997
	876							8.828	32.754
	880							8.794	32.585
	884							8.711	32.304
	888							8.703	32.161
	892							8.686	31.979
	896							8.608	31.79
	900							8.531	31.781
	904							8.513	31.612
	908							8.509	31.428
	912							8.476	31.406
	916							8.471	31.454
	920							8.437	31.405
	924							8.368	31.244
	928							8.37	31.21
	932							8.364	31.358
	936							8.346	31.374
	940							8.318	31.116
	944							8.299	30.972
	948							8.258	30.906
	952							8.209	30.813
	956							8.207	30.7
	960							8.174	30.571
	964							8.111	30.547
	968							8.08	30.509
	972							8.08	30.621
	976							8.019	30.591
	980							7.946	30.397
	984							7.929	30.262
	988							7.897	30.134
	992							7.838	30.229
	996							7.806	30.264
	1000							7.796	30.055
	1004							7.771	29.94
	1008							7.699	29.833
	1012							7.661	29.595
	1016							7.67	29.734
	1020							7.615	30.063
	1024							7.583	29.967
	1028							7.565	29.693
	1032							7.513	29.638
	1036							7.467	29.664
	1040							7.427	29.61
	1044							7.402	29.445
	1048							7.364	29.32
	1052							7.303	29.328
	1056							7.302	29.102
	1060							7.305	28.757
	1064							7.276	28.771
	1068							7.254	28.972
	1072							7.219	28.711
	1076							7.191	28.263
	1080							7.159	28.149
	1084							7.167	28.216
	1088							7.159	28.283
	1092							7.126	28.208
	1096							7.119	28.224
	1100							7.117	28.328
	1104							7.092	28.3
	1108							7.043	28.306
	1112							7.009	28.283
	1116							6.98	28.128
	1120							6.983	27.944
	1124							6.936	27.829
	1128							6.899	27.596
	1132							6.938	27.456
	1136							6.908	27.468
	1140							6.884	27.356
	1144							6.887	27.231
	1148							6.877	27.201
	1152							6.872	27.307
	1156							6.854	27.288
	1160							6.841	27.071
	1164							6.829	27.04
	1168							6.798	27.055
	1172							6.831	27.05
	1176							6.838	26.999
	1180							6.761	26.918
	1184							6.753	26.993
	1188							6.763	26.988
	1192							6.777	27.092
	1196							6.761	27.071
	1200							6.733	27.127
	1204							6.73	27.348
	1208							6.729	27.411
	1212							6.72	27.307
	1216							6.661	27.171
	1220							6.642	27.157
	1224							6.658	26.978
	1228							6.668	26.85
	1232							6.691	26.812
	1236							6.67	26.868
	1240							6.642	26.976
	1244							6.647	26.96
	1248							6.637	26.989
	1252							6.613	26.965
	1256							6.581	26.813
	1260							6.581	26.75
	1264							6.594	26.669
	1268							6.594	26.613
	1272							6.599	26.599
	1276							6.578	26.615
	1280							6.547	26.562
	1284							6.534	26.478
	1288							6.55	26.671
	1292							6.568	26.647
	1296							6.585	26.643
	1300							6.594	26.696
	1304							6.582	26.637
	1308							6.554	27.308
	1312							6.562	27.895
	1316							6.584	27.85
	1320							6.547	27.807
	1324							6.536	27.963
	1328							6.535	28
	1332							6.541
	1336							6.571
	1340							6.572
	1344							6.594
	1348							6.606
	1352							6.576
	1356							6.577
	1360							6.59
	1364							6.609
	1368							6.592
	1372							6.537
	1376							6.538
	1380							6.591
	1384							6.6
	1388							6.576
	1392							6.574
	1396							6.57
	1400							6.583
	1404							6.593
	1408							6.601
	1412							6.591
	1416							6.589
	1420							6.621
	1424							6.628
	1428							6.599
	1432							6.569
	1436							6.602
	1440							6.607
	1444							6.572
	1448							6.579
	1452							6.586
	1456							6.568
	1460							6.565
	1464							6.599
	1468							6.624
	1472							6.619
	1476							6.6
	1480							6.606
	1484							6.623
	1488							6.61
	1492							6.626
	1496							6.641
	1500							6.6
	1504							6.598
	1508							6.596
	1512							6.587
	1516							6.604
	1520							6.583
	1524							6.541
	1528							6.542
	1532							6.554
	1536							6.527
	1540							6.535
	1544							6.545
	1548							6.513
	1552							6.527
	1556							6.512
	1560							6.477
	1564							6.502
	1568							6.516
	1572							6.507
	1576							6.506
	1580							6.506
	1584							6.487
	1588							6.444
	1592							6.384
	1596							6.36
	1600							6.375
	1604							6.401
	1608							6.418
	1612							6.4
	1616
	1620
	1624
	1628
	1632
	1636
	1640
	1644
	1648
	1652
	1656
	1660
	1664
	1668
	1672
	1676
	1680
	1684
	1688
	1692
	1696
	1700
	1704
	1708
	1712
	1716
	1720
	1724
	1728
	1732
	1736
	1740
	1744
	1748
	1752
	1756
	1760
	1764
	1768
	1772
	1776
	1780
	1784
	1788
	1792
	1796
	1800
	1804
	1808
	1812
	1816
	1820
	1824
	1828
	1832
	1836
	1840
	1844
	1848
	1852
	1856
	1860
	1864
	1868
	1872
	1876
	1880
	1884
	1888
	1892
	1896
	1900
	1904
	1908
	1912
	1916
	1920
	1924
	1928
	1932
	1936
	1940
	1944
	1948
	1952
	1956
	1960
	1964
	1968
	1972
	1976
	1980
	1984
	1988
	1992
	1996
	2000
	2004
	2008
	2012
	2016
	2020
	2024
	2028
	2032
	2036
	2040
	2044
	2048
	2052
	2056
	2060
	2064
	2068
	2072
	2076
	2080
	2084
	2088
	2092
	2096
	2100
	2104
	2108
	2112
	2116
	2120
	2124
	2128
	2132
	2136
	2140
	2144
	2148
	2152
	2156
	2160
	2164
	2168
	2172
	2176
	2180
	2184
	2188
	2192
	2196
	2200
	2204
	2208
	2212
	2216
	2220
	2224
	2228
	2232
	2236
	2240
	2244
	2248
	2252
	2256
	2260
	2264
	2268
	2272
	2276
	2280
	2284
	2288
	2292
	2296
	2300
	2304
	2308
	2312
	2316
	2320
	2324
	2328
	2332
	2336
	2340
	2344
	2348
	2352
	2356
	2360
	2364
	2368
	2372
	2376
	2380
	2384
	2388
	2392
	2396
	2400
	2404
	2408
	2412
	2416
	2420
	2424
	2428
	2432
	2436
	2440
	2444
	2448
	2452
	2456
	2460
	2464
	2468
	2472
	2476
	2480
	2484
	2488
	2492
	2496
	2500
	2504
	2508
	2512
	2516
	2520
	2524
	2528
	2532
	2536
	2540
	2544
	2548
	2552
	2556
	2560
	2564
	2568
	2572
	2576
	2580
	2584
	2588
	2592
	2596
	2600
	2604
	2608
	2612
	2616
	2620
	2624
	2628
	2632
	2636
	2640
	2644
	2648
	2652
	2656
	2660
	2664
	2668
	2672
	2676
	2680
	2684
	2688
	2692
	2696
	2700
	2704
	2708
	2712
	2716
	2720
	2724
	2728
	2732
	2736
	2740
	2744
	2748
	2752
	2756
	2760
	2764
	2768
	2772
	2776
	2780
	2784
	2788
	2792
	2796
	2800
	2804
	2808
	2812
	2816
	2820
	2824
	2828
	2832
	2836
	2840
	2844
	2848
	2852
	2856
	2860
	2864
	2868
	2872
	2876
	2880
	2884
	2888
	2892
	2896
	2900
	2904
	2908
	2912
	2916
	2920
	2924
	2928
	2932
	2936
	2940
	2944
	2948
	2952
	2956
	2960
	2964
	2968
	2972
	2976
	2980
	2984
	2988
	2992
	2996
	3000
	3004
	3008
	3012
	3016
	3020
	3024
	3028
	3032
	3036
	3040
	3044
	3048
	3052
	3056
	3060
	3064
	3068
	3072
	3076
	3080
	3084
	3088
	3092
	3096
	3100
	3104
	3108
	3112
	3116
	3120
	3124
	3128
	3132
	3136
	3140
	3144
	3148
	3152
	3156
	3160
	3164
	3168
	3172
	3176
	3180
	3184
	3188
	3192
	3196
	3200
	3204
	3208
	3212
	3216
	3220
	3224
	3228
	3232
	3236
	3240
	3244
	3248
	3252
	3256
	3260
	3264
	3268
	3272
	3276
	3280
	3284
	3288
	3292
	3296
	3300
	3304
	3308
	3312
	3316
	3320
	3324
	3328
	3332
	3336
	3340
	3344
	3348
	3352
	3356
	3360
	3364
	3368
	3372
	3376
	3380
	3384
	3388
	3392
	3396
	3400
	3404
	3408
	3412
	3416
	3420
	3424
	3428
	3432
	3436
	3440
	3444
	3448
	3452
	3456
	3460
	3464
	3468
	3472
	3476
	3480
	3484
	3488
	3492
	3496
	3500
	3504
	3508
	3512
	3516
	3520
	3524
	3528
	3532
	3536
	3540
	3544
