# Supplementary material for: Reactive Oxygen Species Mediate Transcriptional Responses to Dopamine and Cocaine in Human Cerebral Organoids
Source: Int J Mol Sci. 2023 Nov 18;24(22):16474. doi: 10.3390/ijms242216474 (PMC10671319; doi:10.3390/ijms242216474)
Supplement: Supplementary file 1 [file ijms-24-16474-s001.zip › Supplemental Excel File S4.xlsx]

## Sheet: Sheet1
	This file contains gene expression lists for 12pcw fetal striatum and D90 cerebral organoids.
	Differential gene expression was calculated on the comparison tab.
	Data here supports Figure S2C.

## Sheet: 12pcw striatum
gene_symbol		occipital neocortex	primary motor-sensory cortex (samples)	amygdaloid complex	medial ganglionic eminence	posterior (caudal) superior temporal cortex (area 22c)	upper (rostral) rhombic lip	caudal ganglionic eminence	dorsal thalamus	anterior (rostral) cingulate (medial prefrontal) cortex	dorsolateral prefrontal cortex	orbital frontal cortex	lateral ganglionic eminence	inferolateral temporal cortex (area TEv, area 20)	hippocampus (hippocampal formation)	ventrolateral prefrontal cortex	parietal neocortex	dorsolateral prefrontal cortex	anterior (rostral) cingulate (medial prefrontal) cortex	amygdaloid complex	dorsal thalamus	upper (rostral) rhombic lip	lateral ganglionic eminence	primary motor-sensory cortex (samples)	medial ganglionic eminence	temporal neocortex	hippocampus (hippocampal formation)	occipital neocortex	caudal ganglionic eminence	orbital frontal cortex	parietal neocortex	hippocampus (hippocampal formation)	dorsal thalamus	amygdaloid complex	primary auditory cortex (core)	primary visual cortex (striate cortex, area V1/17)	anterior (rostral) cingulate (medial prefrontal) cortex	striatum
TSPAN6	1	36.4471	24.2513	19.3305	27.6686	19.9982	14.6807	27.5481	16.5802	44.5878	44.9439	41.0847	22.1779	23.6401	43.1942	30.1334	26.3912	21.5381	26.5323	25.0199	11.8021	13.9844	20.2321	26.92	20.0073	16.4031	28.3319	19.2111	29.1867	22.8359	17.3317	25.5765	6.68301	28.501	5.30164	3.49083	5.28283	18.851
TNMD	2	0.044081	0.067338	0	0.145466	0.185188	0.31118	0	0	0.473831	0.18122	0.635343	0.049313	0.006587	0.163946	0.086484	0.159348	0.025361	0.302944	0.029515	0	0.132173	0.028394	0.023062	0.079898	0	0	0.024628	0.051969	0.471646	0	0	0.026104	0	0.01941	0.082153	0.044337	0
DPM1	3	34.3732	20.7657	18.7349	22.3664	19.2284	11.0204	25.3946	17.6713	32.9031	38.1576	29.3714	17.982	19.3905	26.1402	27.7713	22.0949	14.3625	15.6908	15.1413	7.42022	8.54311	14.0388	14.2807	13.2967	16.4672	17.3362	17.1347	12.9597	13.5011	16.652	21.7716	11.1082	17.2803	10.079	9.635	10.1126	21.0632
SCYL3	4	4.37934	4.22752	2.55183	3.60376	2.94898	2.40518	3.61364	2.57394	3.48382	3.60983	3.28707	3.60251	3.30855	3.55703	3.13588	3.46724	3.82192	3.2687	2.63028	1.7243	1.77482	2.81668	3.71603	3.32986	2.61259	3.01709	4.2174	3.06922	3.20481	2.99616	3.13845	2.23197	3.3917	2.41616	2.38196	2.53906	2.073
C1orf112	5	3.95712	3.52079	2.03781	3.48704	2.17724	0.999693	3.48156	1.74757	3.74158	3.56065	2.80486	2.86184	2.01141	3.77434	2.68787	3.04757	4.22029	3.91907	3.28827	1.47805	1.23665	4.0679	4.63471	4.24811	2.91677	3.24947	4.16034	4.49465	3.62746	3.37413	1.89056	0.991139	2.91138	0.914323	0.735102	0.825028	1.133
FGR	6	0.244174	0.266976	0.248188	0.141398	0.467688	0.296493	0.079941	0.149822	0.20421	0.260205	0.460497	0.111897	0.210155	0.608868	0.224219	0.292505	0.115094	0.092383	0.067247	0.186979	0.314919	0.129033	0.127167	0.134296	0.276757	0.320984	0.396305	0.071558	0.281391	0.30325	0.251828	0.15457	0.212212	0.309675	0.550727	0.342607	0.137401
CFH	7	1.73981	1.63116	1.50564	0.184312	8.45781	0.824817	0.086144	0.104424	0.862773	1.51137	3.0103	0.101931	1.10233	2.9697	1.7541	1.87264	0.92726	1.07731	0.180306	0.10556	5.51651	0.117305	0.717243	0.525754	2.80121	2.96179	3.81341	0.077251	1.42874	5.78457	0.854257	0.13833	0.13041	5.23333	1.11251	0.814031	0.668411
FUCA2	8	10.0932	7.41374	6.84442	8.24134	8.19375	7.17765	9.68976	9.27147	11.9688	10.1736	15.1232	7.15612	7.26258	16.8868	8.66245	7.54614	8.0434	8.65947	9.23225	6.91426	7.39256	8.34169	8.94584	7.44951	6.83821	11.6335	7.71618	11.6662	7.65469	7.0641	9.62488	1.80514	9.99363	3.52093	2.60109	1.70077	7.89414
GCLC	9	2.63216	2.35007	2.09124	1.97061	2.78056	1.82803	2.17641	1.85036	2.75371	2.51813	3.54123	1.79834	2.25871	3.14482	2.70215	2.37408	1.99159	1.88791	1.78421	1.396	1.79614	1.52832	1.97829	1.7524	2.19409	2.49919	2.24774	1.7457	1.85733	2.18189	2.28377	1.13376	1.95444	1.73001	1.175	0.988362	3.19081
NFYA	10	24.8457	27.2833	26.2268	26.8438	29.273	12.3909	27.5504	11.3776	20.5567	22.9192	19.3249	26.7442	27.0712	19.3366	28.2456	27.117	25.7632	23.2842	28.6651	12.3045	16.7384	24.2762	22.9947	23.9569	40.65	26.4831	30.7347	29.1917	24.8021	39.3618	22.3162	30.6301	26.3444	39.5951	51.6646	68.8941	10.0909
C1orf201	11	0.433926	0.370707	0.733702	0.397208	0.517359	2.02578	0.307355	0.957189	0.621149	0.373008	0.611915	0.468003	1.09132	0.921629	0.249744	0.347897	0.305491	0.334526	1.11365	2.88276	2.8745	0.392089	0.254758	0.72234	0.542771	0.96836	0.511414	0.357972	0.594616	0.375793	0.79688	0.699866	0.624477	0.384478	0.308266	0.432029	3.26491
NIPAL3	12	1.3631	1.36858	3.36372	1.95494	2.07652	2.16441	1.85898	1.25977	1.40384	1.11248	1.76608	2.51762	3.73671	1.70067	1.32354	1.37409	1.26177	1.41047	3.4598	2.34516	2.89677	1.79382	1.37302	2.94096	2.40637	2.09699	1.64686	1.40608	1.46251	1.79636	1.35091	4.41825	1.85742	1.34685	1.4757	3.20145	2.67859
LAS1L	13	11.037	8.93972	6.51024	7.49421	6.18907	5.62891	8.01256	5.16719	10.1519	8.77894	6.4531	7.29981	5.532	8.85886	7.9015	9.14832	8.43089	8.37195	6.25049	4.75497	5.37019	8.1455	9.07897	6.79694	5.95236	7.74444	7.80187	7.65658	9.06461	6.62762	4.63533	5.88113	6.35668	5.24725	5.76339	4.60085	2.17709
ENPP4	14	2.24322	1.6937	2.69721	2.63631	1.79736	2.86381	2.00505	1.7251	1.87568	1.71602	2.21062	2.32225	2.7704	2.32411	2.13828	1.56671	1.19034	1.56553	2.37492	1.98656	6.41514	3.11017	1.4674	2.84283	2.05386	2.23887	1.56679	2.06535	1.28932	1.39493	4.33243	4.23301	3.09802	2.11782	2.31028	2.78972	8.17709
SEMA3F	15	3.67356	6.49052	8.55155	3.61556	7.37911	17.4451	3.44294	3.85583	2.61956	2.78076	5.44716	5.66095	6.24134	2.49976	3.86095	6.27613	10.3559	9.08112	4.20589	6.1817	14.8058	5.53739	8.11106	4.69121	8.70644	3.95423	9.30654	2.71554	8.44697	9.46414	1.88762	20.2017	3.79816	14.683	18.8315	12.0365	2.82644
CFTR	16	0.005263	0	0.044505	0.014686	0.027397	0.012176	0.015439	0	0	0	0.006828	0.029043	0.024896	0.088493	0	0	0.005974	0.005893	0.006953	0	0.024876	0.006689	0.011015	0.006302	0	0.022257	0	0.006163	0	0	0.006518	0.079778	0.023088	0.004572	0.016783	0.005222	0
ANKIB1	17	6.8075	9.53796	9.15939	8.95102	9.40061	9.17958	8.93162	7.75842	7.54134	7.00085	7.51686	10.5961	12.0819	9.0006	7.71096	8.03405	6.40375	6.85604	8.03422	7.434	10.1202	7.44498	6.35109	8.51531	7.35332	7.70452	5.58792	5.32876	6.78557	6.24505	12.583	10.758	11.3033	11.6031	9.29439	12.4306	18.3429
CYP51A1	18	37.6081	37.3564	26.6227	32.082	33.3862	23.2162	31.9255	56.7156	35.5179	39.122	26.5348	31.2449	31.0917	33.6093	42.4499	35.3302	33.3563	32.0011	30.2665	36.544	22.378	26.8161	39.1436	28.5884	36.5969	30.8637	37.8332	30.2492	27.4415	41.5104	27.5515	19.4372	21.48	22.9734	15.5563	19.0376	44.8647
KRIT1	19	5.84588	6.34075	4.19872	5.18509	4.87615	3.64811	5.44059	3.35694	5.95743	5.054	5.30559	5.50434	4.64529	5.65383	5.24869	5.66146	4.92441	5.26149	4.75494	2.55036	2.92196	5.54421	6.14258	5.67539	5.56243	4.78768	6.34919	4.88874	4.14548	5.40847	3.81726	3.49717	4.2299	2.93438	3.60468	3.02692	2.4715
RAD52	20	1.33644	1.87398	0.90844	1.5111	1.16267	1.29911	1.18208	0.681558	0.839202	1.03181	0.82735	1.46121	1.13436	1.08783	1.14665	1.45184	2.77098	2.93706	1.2511	1.3326	1.14437	3.39908	3.0647	2.63243	2.37371	1.46079	2.51871	1.35909	2.5941	2.33245	1.40475	1.7359	1.47176	1.72475	1.50108	1.46231	0.581681
MYH16	21	0.003796	0	0	0.001483	0	0.012197	0	0	0	0.00763	0	0.018015	0	0.001441	0	0	0.008791	0.022752	0.007422	0.006739	0.020052	0.073141	0.01859	0.027184	0.045967	0.001846	0.029354	0.014225	0.05074	0.009031	0.002915	0.025016	0.006099	0.01583	0.005326	0.02117	0
BAD	22	20.378	16.026	24.6421	20.0263	20.7048	18.2905	17.7625	29.0002	20.2315	27.4094	30.0201	17.1594	20.6308	22.8381	21.6196	18.3194	16.6488	17.1176	14.9928	23.612	16.308	14.7135	13.9983	11.7966	10.1555	16.4562	11.4129	21.8213	16.7078	10.2993	32.2828	31.4784	25.8049	23.0696	24.3582	19.3463	33.1264
LAP3	23	7.36567	6.45107	3.97359	4.19136	6.62963	4.12883	4.58662	3.18453	7.74597	7.47203	9.48143	4.10918	4.70157	7.97783	6.99742	6.13956	5.7109	5.80711	3.47069	2.24205	3.21212	3.38517	6.07262	3.06311	5.49488	6.2459	5.59212	3.73576	6.01291	5.77266	6.4536	2.94181	4.60347	4.11502	6.07452	5.51199	3.40631
CD99	24	0	0	0	0	0	0	0	0	0	0	0	0	0	0	0	0	0	0	0	0	0	0	0	0	0	0	0.012071	0	0	0	0	0	0	0	0	0	0
HS3ST1	25	0.194591	0.31384	0.841067	0.254977	1.38164	1.00284	0.277937	0.684696	0.6321	0.342238	2.13927	0.531919	0.840089	0.815714	0.527126	0.358314	0.371484	0.667357	0.391282	0.578136	0.857329	0.553151	0.356253	0.575861	0.942355	1.27527	0.414897	0.115745	0.529142	0.691627	0.651627	3.39927	0.734496	2.75783	1.13132	1.23277	0.761315
ABP1	26	0	0	0	0	0	0	0	0	0	0.012793	0	0	0.008936	0	0	0.009673	0.006792	0	0	0	0	0.006148	0	0.01128	0	0.009959	0	0	0	0	0	0	0	0.008184	0	0.009221	0.005993
WNT16	27	0.121679	0.044856	0.161907	0.092458	0.380829	0.038911	0.368807	0	0.111015	0.405171	0.557557	0.19499	0.125063	0.093306	0.204793	0.079354	0.037669	0.079236	0.182269	0.026536	0.119142	0.32371	0.069446	0.105606	0.120733	0.023388	0.098881	0.560103	0.041953	0.085277	0.150694	0	0.036516	0.259462	0.070385	0.087806	0.070739
HECW1	28	3.5981	9.21853	5.55227	2.39008	6.99828	8.34299	3.55729	9.08262	13.4349	3.37142	2.2198	3.89008	6.11783	9.1253	4.67363	7.45387	7.43367	9.75806	3.9244	8.77517	7.26153	2.45443	3.39606	2.40764	7.27236	8.41283	7.54059	2.15623	17.2213	7.71216	4.37658	5.1099	4.85686	7.12581	9.34343	14.1011	3.38334
MAD1L1	29	5.535	5.61678	6.13379	5.8729	5.60554	6.29977	7.42787	4.55396	4.40679	4.16992	4.33218	6.08999	5.69171	5.30251	5.14775	5.9371	5.01099	4.83795	5.18642	3.47183	4.67422	4.10644	4.93238	3.75811	3.91137	4.61011	5.16874	5.42576	5.04307	4.42077	3.47796	6.40082	5.61296	3.86943	3.99961	3.83449	1.79053
LASP1	30	61.6026	64.0289	95.6475	73.5142	89.1523	82.271	81.0636	64.7813	55.9958	54.7237	65.1369	76.0656	82.774	67.8779	67.4092	68.0381	71.8553	62.8493	93.5854	72.7587	83.6041	70.4052	70.6221	69.6908	73.5449	81.7728	63.5239	94.8938	66.6537	76.4173	77.5625	89.5527	83.0005	79.7545	84.785	67.206	57.0139
SNX11	31	11.2712	8.2418	8.61788	7.42629	7.5282	10.1007	7.65666	8.30298	9.11977	11.5229	10.0417	6.91726	8.37831	10.1858	8.583	8.13617	7.38501	5.94161	5.89948	6.89202	7.28977	5.78867	5.20106	5.08443	5.14973	8.04123	5.22334	5.83636	6.96044	5.44055	13.0484	10.0823	9.1379	8.904	8.23176	7.94687	9.63858
TMEM176A	32	0.168343	0.146931	0.101042	0.03833	0.515994	0.254748	0	0.268308	0.052049	0.295034	0.736857	0	0.147054	0.471013	0.240723	0.148532	0.035163	0.105642	0.027405	0.062039	0.454879	0.026364	0.021706	0.049681	0.263583	0.294582	0.115431	0.011981	0.405269	0.215348	0.140785	0.241069	0.034087	0.394291	0.241502	0.235322	0.01285
M6PR	33	10.5823	9.62322	7.79871	8.95997	10.3949	7.53511	8.85049	7.39143	11.3635	10.4544	9.7972	8.34537	8.71116	10.7252	8.99075	9.42249	6.94709	7.87704	5.90257	4.744	5.91085	6.24723	6.8601	6.23075	6.50004	7.46671	7.11161	6.13441	7.47403	6.38206	9.26483	5.60053	8.32562	6.6348	5.6489	5.79351	7.18346
KLHL13	34	4.74139	3.69534	17.6564	18.1113	6.63124	11.5567	7.28982	8.72885	7.28049	6.36376	10.4192	7.62038	9.48545	4.68016	5.01912	3.552	4.32556	5.23927	11.4182	27.8835	18.6792	10.4562	4.63586	16.7884	3.74392	5.98682	3.8417	10.7044	4.92209	3.30699	4.26861	25.5402	12.1598	3.92093	1.43974	2.19825	47.9109
CYP26B1	35	0.675833	1.55182	4.15083	0.467833	0.811993	46.5079	0.865826	0.040692	2.85582	1.38522	2.68514	0.158673	10.9005	0.437371	0.819393	0.899678	1.78059	2.56414	5.69553	0.1896	66.3432	0.264263	0.480828	3.10083	0.343296	1.50928	0.922447	0.185202	5.75326	0.660478	1.37299	1.11617	5.57289	0.501991	10.75	4.86835	0.298668
ICA1	36	0.823257	0.732728	1.40178	0.523515	1.83502	3.20415	0.498153	2.10536	0.582782	0.693743	0.942984	0.711754	1.71966	0.92378	0.826793	0.781438	0.625025	0.667857	0.989748	4.02356	3.12543	0.828227	0.509795	1.3533	1.77706	0.99902	1.12602	0.333194	0.902631	1.75992	1.54308	4.36819	1.32695	3.48479	2.63163	2.20846	4.46669
DBNDD1	37	10.8153	14.1541	18.0178	20.1843	18.4457	30.8879	15.3675	27.1065	9.07091	8.83626	8.41075	18.5361	18.6057	11.53	12.8399	16.5331	15.2409	14.9075	16.8762	46.752	31.9736	15.0234	14.0835	17.2425	14.4817	17.0841	14.9714	17.9527	17.6644	17.1042	18.1993	27.4198	15.8557	29.8379	29.8848	24.9646	22.2153
ALS2	38	4.91419	5.83239	6.145	4.72503	5.79338	4.47567	5.17372	2.89306	4.20768	3.54401	3.86777	5.1299	6.19864	4.6728	4.41922	5.52258	6.22923	5.92832	6.38886	4.79386	6.48479	5.34078	5.60296	5.38003	8.102	7.57309	6.95582	5.02147	5.97441	7.73126	6.49541	5.48252	4.53291	6.81954	7.74152	9.19043	5.27845
CASP10	39	0.35554	0.355559	0.404787	0.286476	0.614886	0.15556	0.274473	0.128752	0.255848	0.340633	0.64512	0.209493	0.296786	0.569415	0.331775	0.355321	0.236889	0.168427	0.150093	0.220463	0.425543	0.168849	0.179094	0.215631	0.272314	0.365754	0.34946	0.077748	0.135412	0.307344	0.193385	0.188512	0.180082	0.234857	0.372988	0.29173	0.117543
CFLAR	40	0.941989	1.49169	0.866251	0.84612	1.27353	1.056	0.924451	0.7588	0.946785	0.896489	1.12431	1.05058	0.762361	1.15818	1.13021	1.3406	1.96762	1.71991	1.20157	1.03508	1.74418	1.66413	1.98642	1.63413	1.98859	1.81971	1.95963	1.13072	1.49248	2.04988	1.26738	0.830055	0.691162	1.1334	1.3041	0.55675	0.434307
TFPI	41	0.942157	0.831305	1.18386	0.915574	1.6396	0.71669	0.916245	0.627152	0.952398	1.10569	1.87061	0.712123	1.18921	2.4005	1.17238	0.793046	0.387217	0.61661	2.19059	0.755372	1.82472	0.640178	0.599089	0.919834	0.981933	2.0813	1.08787	1.13298	0.924098	0.799338	3.03108	0.592152	4.72311	0.54673	0.624134	0.521219	4.82073
C2orf56	42	4.14878	3.92988	3.18859	3.72618	2.52908	2.02629	4.10468	2.18558	3.31209	3.84787	3.54232	3.67025	2.82348	3.92935	3.3999	3.45967	4.95004	4.28714	4.52505	3.10477	3.22984	5.52065	5.36733	5.48588	4.73266	4.09677	4.58648	5.12742	4.124	4.52041	2.95678	3.73748	3.90977	2.4314	2.29352	2.1872	3.39204
RBM5	43	5.8624	10.5557	6.59112	6.71737	7.4589	10.9212	5.76307	4.51107	4.64766	4.98135	4.97102	10.0404	7.28586	5.43924	6.02751	7.98138	11.3174	10.8378	3.90047	4.60149	7.39027	14.4059	11.1655	12.2419	8.4286	3.1258	10.0365	3.88324	8.70677	8.57298	7.56298	13.8539	8.61738	13.9785	12.5602	11.8342	5.14741
MTMR7	44	1.53078	2.13943	3.97885	2.63931	3.81626	4.10151	2.85816	3.55088	1.64458	1.65719	2.01193	3.19202	4.69173	1.11883	2.85473	1.96411	2.4412	2.3877	4.03083	3.9551	4.79411	3.48652	2.25646	3.30829	4.78869	2.0433	2.64707	3.06134	1.97778	4.00593	3.03573	4.4741	3.46205	5.47041	4.81754	5.15266	5.3529
SLC7A2	45	1.45353	1.10873	0.92202	0.910815	5.50241	0.25666	0.644006	0.067017	0.348683	0.470692	5.21518	0.623813	1.0114	0.086443	1.02236	1.25887	0.578733	0.522516	0.722232	0.114826	0.386301	0.607361	0.899057	0.752514	1.64381	0.351699	2.08619	0.852141	0.453726	3.17629	0.11291	0.106448	1.05712	2.02643	0.033873	0.022569	0.163801
ARF5	46	79.963	52.8537	82.0423	63.3873	60.652	79.173	54.9392	77.5501	70.6406	88.1648	97.1543	59.3512	69.2325	80.8609	71.429	63.2774	53.291	57.0541	59.8626	82.7323	74.4817	53.1601	46.8138	47.2971	41.741	66.8978	40.0539	56.5274	66.1772	46.1945	98.5398	105.612	84.0069	75.9342	80.4891	71.0774	95.6977
SARM1	47	8.93297	11.7945	12.0777	12.8944	10.417	12.8713	11.6223	9.33991	7.48015	6.7842	5.16073	12.8544	12.1406	9.96084	7.40627	10.5427	12.7645	12.9357	14.0462	12.8574	14.6609	11.273	12.4787	12.5535	9.87835	13.3084	12.1568	14.7338	13.6178	11.3267	12.3424	17.0301	14.5582	15.0165	13.6247	14.9159	6.39898
POLDIP2	48	45.2893	36.7712	38.9523	38.5	39.7277	33.6453	35.5175	31.9133	42.1839	48.6605	40.0577	36.1925	37.7338	38.8306	41.1636	37.224	29.2928	31.9376	29.6822	26.9352	31.5811	25.8713	29.5784	25.1832	24.7182	35.6486	27.3913	34.0155	35.6931	26.3184	39.8486	42.4184	43.1939	34.5583	34.5598	34.9111	29.5602
PLXND1	49	5.01072	9.7853	7.73104	3.17393	16.0825	3.57095	4.80872	1.43063	3.47448	4.39077	4.36124	5.00506	6.60821	5.38881	6.95706	8.61276	7.21525	7.77844	3.40035	1.56757	6.36697	5.13018	4.43942	3.53722	12.1742	7.46239	10.1628	3.29307	8.36007	9.48673	3.69037	2.90317	2.6362	6.22293	8.08339	6.09913	0.724351
AK2	50	9.95515	6.57542	4.958	7.47485	5.76173	4.01525	7.25011	5.36111	9.20847	9.07208	8.7593	6.43384	4.58734	8.77288	6.94118	6.98831	7.92246	7.44374	5.83151	3.16853	3.96639	6.41924	8.58115	6.82277	5.85108	8.02836	8.00404	7.85975	8.16963	6.46249	6.00318	3.07226	6.40465	2.63961	2.96833	2.28064	2.64856
CD38	51	0.023467	0.011895	0.056086	0.021532	0	0	0	0	0.021085	0.015934	0.015017	0.025723	0.02211	0.024743	0.02795	0	0	0.013318	0	0	0.041686	0.029823	0.024389	0.05563	0	0.007543	0.039332	0	0.012427	0.03021	0.029063	0.010374	0.025648	0.03058	0.012471	0.034612	0.028875
FKBP4	52	48.3337	36.501	45.3379	40.0212	37.0894	28.7707	41.3892	28.0965	38.303	45.021	33.9889	38.0791	36.8688	32.2363	39.692	39.7389	41.0415	38.9158	44.8128	26.0024	29.4171	34.9489	39.8539	33.7197	33.3871	43.0529	37.1091	47.0767	40.1284	34.317	34.6545	35.2426	38.2616	29.5167	30.0651	25.8742	18.1215
KDM1A	53	116.911	114.31	111.913	119.522	104.835	89.4253	122.136	99.5757	100.758	101.547	71.6192	105.829	99.4039	102.026	107.036	109.761	105.53	100.318	107.695	85.4049	83.6596	83.5183	92.9366	80.9593	100.285	104.857	106.279	110.34	106.234	104.469	76.7724	75.4659	98.9307	74.9787	80.9976	100.472	35.6332
RBM6	54	6.52518	13.958	8.24803	7.84683	9.43482	13.7378	7.95686	7.6712	6.53288	5.94023	4.80219	12.2424	8.26093	6.6897	7.88066	10.1213	13.9999	12.2235	5.97643	7.35477	8.32771	15.0385	12.375	12.2451	11.0952	5.36731	10.8864	5.60361	10.8477	11.6113	7.23424	13.2506	7.86266	13.0328	12.3262	11.5341	4.49463
CAMKK1	55	3.4064	3.51328	2.62248	2.34535	3.77779	3.11764	2.10629	4.41986	2.67137	2.90053	2.17882	2.90255	2.67698	3.56704	2.83008	3.99109	3.23067	3.61461	2.10075	4.27737	3.70826	1.99982	3.00948	1.64486	2.97731	3.05651	3.11228	1.74064	3.89295	2.75365	4.65111	5.73719	3.02058	7.34364	5.40264	3.93874	4.22151
RECQL	56	13.5679	13.2985	8.29311	10.9672	10.5705	4.81272	12.2264	7.6724	15.6397	14.7378	11.8753	10.143	8.21396	12.7173	14.1124	12.1313	10.0558	9.90997	10.0186	4.47353	4.90386	8.93943	11.8429	8.52367	10.1216	10.811	10.6353	12.4795	8.52203	10.8079	10.9037	4.62072	8.49126	5.76265	6.51626	7.40899	9.99845
CCDC132	57	5.47434	5.04931	5.25275	4.14744	5.83111	4.27331	4.22065	3.58231	5.31216	5.6657	5.64973	4.32196	6.44951	4.26956	6.13906	4.84286	3.59257	3.42891	4.58936	3.58105	3.89072	3.47469	3.71415	3.72641	4.77418	4.83208	4.41093	3.35599	3.52569	4.37001	9.37185	5.82642	4.86651	6.79272	5.96546	6.94486	12.4648
HSPB6	58	1.0861	1.1014	1.08533	0.869922	1.47492	1.66244	1.93938	0.587496	1.05418	0.369629	1.69886	1.36208	1.05403	1.97936	0.863793	1.21067	1.51487	1.50795	2.48218	0.266324	0.853654	1.44444	1.96462	1.04786	0.698727	2.94926	1.18893	2.72045	4.10986	1.00685	2.9399	0.34459	5.35665	0.429064	0.288954	0.31885	0.245235
ARHGAP33	59	12.131	25.9318	25.4842	24.1437	27.0308	59.319	26.4742	28.4013	11.0389	9.17949	6.30061	35.7487	24.3423	10.3688	16.956	21.6913	43.9824	40.7529	35.6018	58.2408	57.8152	44.7529	38.5356	42.4558	30.9036	23.0823	38.6369	44.2169	39.9791	36.4672	20.9462	46.3978	25.4396	57.2672	44.9714	46.5657	17.825
NDUFAB1	60	69.9411	45.7281	62.8582	60.3661	50.3902	40.4717	54.0446	53.5407	73.2586	94.9739	79.3876	49.0895	58.1427	62.3996	66.9964	55.6654	36.2357	40.2438	42.152	43.7945	41.6935	36.1892	33.0274	36.8117	39.4875	46.486	33.3677	39.7273	39.0012	33.5422	69.3948	49.7069	57.9611	42.2484	45.9549	41.6175	82.6543
PDK4	61	1.28877	1.49089	0.512301	1.08201	1.81955	0.953151	1.2083	0.411476	1.02314	1.06457	2.24905	1.65846	0.95285	1.91274	1.52366	1.40612	2.15133	1.90548	2.04662	0.313439	1.44115	2.20896	4.45132	2.26942	3.05975	2.71749	3.40418	1.97311	1.30143	3.44441	1.09731	0.379104	1.19937	0.652536	1.06768	0.964359	0.429193
SLC22A16	62	0.047511	0.028509	0.011434	0	0.009946	0.055709	0.009333	0.03225	0	0	0.156264	0	0.008892	0.059708	0.012316	0.029139	0	0	0	0.011244	0.022455	0.01175	0.010749	0	0.012986	0.040181	0.021235	0	0.029919	0.020789	0.070291	0.022204	0.010456	0	0	0	0.047086
ZMYND10	63	0.286753	0.162473	1.16562	1.55371	0.335371	0.861373	0.569013	0.585304	0.504995	0.351285	1.34038	1.0435	0.692922	2.86218	0.296076	0.110415	0.202746	0.557865	0.789737	1.18809	1.09462	1.35516	0.247535	1.73181	0.170701	0.689519	0.12993	1.36924	0.30215	0.198986	2.30053	1.96066	2.24657	0.344008	0.19966	0.299232	2.3018
ABCB5	64	0	0	0.009488	0.003617	0	0	0.00222	0	0	0	0.010092	0	0.003639	0.006373	0	0.003994	0.004415	0.002923	0.015414	0	0	0.004943	0	0.009314	0	0.004112	0	0.003631	0.004119	0.004283	0.004817	0.004544	0.001561	0	0.004134	0.003859	0
ARX	65	14.4441	23.7305	55.2738	68.7704	14.1835	0.051264	61.3787	0.169854	15.8939	10.2778	5.96494	62.2253	27.6351	15.6465	13.9715	20.1216	24.8893	24.8673	30.6631	0.120127	0.05967	30.4556	27.9977	28.2124	9.0399	17.35	19.8003	42.3489	30.2547	13.6675	10.8147	36.9925	43.5716	3.8002	1.56898	3.97065	3.54064
SLC25A13	66	5.55217	6.21543	4.73484	8.06731	3.87401	3.06366	5.60179	5.10395	7.855	8.12361	7.38485	7.87866	3.56763	7.90916	6.07889	5.45626	3.82801	4.57382	2.50726	2.6187	2.52559	3.67099	4.02772	4.25496	2.35412	2.54172	3.04432	4.25664	4.13711	2.94814	2.97537	2.62886	4.54586	1.607	1.21584	1.88524	2.52659
ST7	67	5.56079	5.68977	10.4616	10.5485	7.49166	7.76974	7.6562	9.98397	4.6211	6.77866	5.77797	8.23749	8.93933	5.47876	6.62368	5.47533	8.54314	7.89533	10.1407	12.7555	10.2645	9.04837	7.71765	10.6968	9.28656	7.53916	6.66997	9.56016	7.11073	8.7187	10.1079	10.493	9.38999	9.91641	17.5055	10.8007	7.14727
CDC27	68	13.897	11.9101	7.96148	12.3757	11.0326	6.48163	11.8006	8.29442	13.5732	13.5348	12.4209	10.5025	11.201	11.8796	12.1012	12.0615	8.8473	10.4689	9.08323	4.80285	5.35501	8.33266	10.9719	9.70339	10.3783	10.4367	11.6283	9.30774	9.61438	10.0655	14.0595	6.31783	10.9491	8.83832	11.0108	11.4683	13.2722
SLC4A1	69	3.05391	2.48185	2.07594	2.16221	2.27868	1.52619	1.35251	1.72646	3.74826	3.56882	23.0687	1.60923	1.67857	8.78544	3.10776	2.75689	1.90374	1.50903	1.70942	1.13786	3.55543	1.36095	1.87951	1.53093	1.74273	2.54341	3.22571	1.69558	2.19389	2.44695	0.360931	0.365011	0.298113	0.784396	1.60757	0.615946	0.327074
CALCR	70	0	0	0.053535	0.041382	0.009314	0.156224	0.008622	0.010067	0	0	0.011388	0.039015	0.04209	0.02802	0.011533	0	0	0	0.058776	0	0.262634	0	0	0.062923	0	0.028221	0	0.031117	0	0	0.065973	0	0.058484	0	0.018788	0.008829	0.011023
HCCS	71	10.2451	7.22557	5.44834	6.56451	6.8305	5.18181	6.54215	7.27913	8.9196	9.39821	8.8809	5.03742	6.17197	8.22846	8.64687	7.1836	3.77131	4.40308	4.34007	3.19425	3.59523	3.11944	3.99136	3.64184	4.47237	5.39956	4.26933	4.3394	4.74774	4.5016	6.57603	4.66874	6.35179	4.5243	5.09294	5.62557	5.71179
DVL2	72	20.9639	19.8748	11.5153	17.6897	15.8008	13.2565	21.0098	13.1995	18.2243	17.2121	13.6921	18.1325	12.4017	19.4043	16.413	19.9654	25.5973	24.5877	17.3725	7.67748	10.1854	19.5465	29.2582	18.5666	15.012	18.5396	22.6354	25.1999	24.4026	16.8193	12.7561	9.72157	17.3459	9.34905	8.592	7.48505	4.22963
PRSS22	73	0	0	0	0	0	0	0	0	0	0	0.096464	0	0	0	0	0	0.000796	0.029459	0	0	0	0	0	0	0	0	0	0	0.109576	0	0	0	0	0	0	0	0
UPF1	74	15.6083	20.3549	16.2918	19.4269	19.3936	22.6443	21.1478	15.4541	13.5856	9.53403	8.90431	21.3768	17.1163	16.678	13.0178	19.9432	22.7533	22.9573	20.8755	16.9932	22.0468	17.2418	26.5725	17.754	17.6311	22.8926	25.9604	25.3696	24.8478	19.1984	13.5061	20.5563	19.714	18.9725	19.9001	17.8795	6.09861
SKAP2	75	0.415533	0.599422	1.06869	0.710712	0.865815	1.02104	0.778184	0.477071	0.561732	0.512361	0.868703	1.01777	1.15382	0.464881	0.656762	0.453808	0.309585	0.272171	0.899697	0.491867	0.980772	1.15995	0.29238	0.84788	0.496604	0.446545	0.414502	0.653349	0.323648	0.501003	0.572661	5.67558	2.98548	0.304663	0.372843	0.392985	1.72579
SLC25A5	76	156.651	105.478	108.295	147.079	109.565	62.245	124.106	75.805	132.011	181.431	151.327	102.593	98.041	114.935	132.278	116.549	100.223	109.012	102.936	59.0942	65.5368	118.409	89.8024	93.5677	87.1942	108.178	89.1342	146.874	112.999	92.5328	112.653	59.3328	134.304	73.3483	88.1195	91.0852	45.7359
CCDC109B	77	8.50043	4.85571	1.96453	3.43634	3.4649	1.01622	3.40346	7.67265	10.1517	10.0943	8.87093	3.27873	3.06454	8.88451	6.51867	6.3269	4.95448	5.90142	3.48487	4.1725	1.25741	2.43969	5.38496	2.79287	3.42798	5.17703	4.65661	3.69813	4.24626	4.21913	3.98278	1.30548	6.59136	1.84841	0.280397	0.416666	7.05845
HOXA11	78	0	0	0	0	0	0	0	0.017701	0	0	0	0	0	0	0	0	0	0	0	0	0	0	0	0	0	0	0	0	0	0	0	0	0	0	0	0	0
POLR2J	79	25.7023	22.5548	18.0272	25.6038	22.6207	28.7401	25.9366	21.7484	32.7513	30.6778	33.8257	24.4492	18.2086	30.09	27.9689	24.4903	18.582	16.8158	14.0614	10.1199	11.9984	14.213	14.8502	13.7748	9.17359	14.6312	14.6567	22.9703	19.2487	13.3105	16.8689	14.3146	20.7649	13.4096	13.2129	8.87841	8.57429
DHX33	80	7.22908	8.05796	4.61244	5.23642	5.81621	4.03517	5.51373	2.9153	6.75188	4.34411	3.28665	5.6176	5.43176	7.27175	4.57021	6.76439	8.25876	8.18808	6.12234	3.54429	4.5728	6.09813	9.85029	6.35453	8.36949	8.98623	10.9827	6.251	9.04889	8.55283	4.51432	4.96941	4.70632	5.98545	6.11502	6.38612	3.13734
MEOX1	81	0.013331	0	0	0.012399	0.069768	0.015631	0	0	0.033448	0	0.311317	0	0	0	0.017279	0	0	0.045395	0	0.01599	0.047576	0	0	0	0	0	0	0	0.084713	0	0	0.247949	0	0.011581	0.028339	0.026455	0.049545
THSD7A	82	6.04149	12.7892	3.39602	2.03802	7.9041	12.5334	3.22771	6.89093	9.22717	8.16993	6.40441	5.68922	8.05679	8.16347	11.5048	10.7669	11.0016	12.712	5.30114	7.99673	10.1065	5.63749	7.76664	3.10853	10.3459	9.91966	9.36009	2.6548	12.1806	10.7257	12.1207	4.10603	4.98092	6.29134	17.235	22.5295	4.59456
LIG3	83	7.44201	8.55121	5.44213	6.34539	5.73661	4.4548	7.31478	5.414	6.64151	5.52722	4.27644	6.88564	5.54165	7.47292	5.32021	7.28291	11.1329	10.3586	8.81403	7.11041	6.50406	8.72168	10.9473	8.04864	8.68079	9.83366	10.4871	9.98472	10.8704	8.97065	5.77549	5.46241	7.78556	5.90596	5.86943	5.40855	2.67334
RPAP3	84	9.06963	8.88216	7.22372	8.32717	6.4999	5.28651	7.69979	12.3053	9.90917	9.11515	9.25736	7.96373	7.01689	10.9698	9.35549	7.65752	6.63607	6.09951	4.77863	6.44151	4.49847	5.30016	6.98516	6.69881	5.58781	7.22602	7.4813	6.06818	6.63017	6.17735	7.16795	5.64997	5.56672	4.0746	4.36335	5.22452	10.0091
ACSM3	85	0.868157	0.722628	0.278982	1.18533	0.636194	0.318562	0.908212	0.732919	0.723264	0.858991	0.76782	0.936272	0.658382	0.755198	0.659734	0.526705	0.219836	0.51318	0.454712	0.349376	0.359175	0.800178	0.453836	1.22186	0.392426	0.532643	0.686264	0.889777	0.482109	0.293725	0.418408	0.239126	0.970798	0.140479	0.140641	0.196766	0.475369
AC004381.6	86	4.35617	4.03771	2.90457	4.8316	2.17049	1.83731	4.1638	2.5107	3.43379	4.16206	2.44043	4.16108	2.41339	2.33888	3.39997	3.43162	5.32034	4.18539	3.86786	1.87427	1.85365	4.66753	4.99964	4.9454	3.23647	3.00345	4.0504	5.25244	4.21224	3.94507	2.94572	2.01745	3.44729	1.35353	2.18161	1.97612	1.52585
CIAPIN1	87	32.4031	22.581	25.1859	24.182	23.1663	19.0477	21.619	27.0964	25.5856	31.2998	26.4572	20.4244	23.9169	28.2768	24.1871	26.0111	20.9553	20.8818	21.0292	22.5763	22.0966	18.0481	18.0938	18.2782	18.8704	25.1877	18.0185	20.5454	22.0028	18.1715	29.394	20.1506	26.9817	21.6488	22.996	21.7692	21.1438
AC004410.1	88	4.9491	5.76263	4.79829	5.92101	4.70458	11.4604	6.06452	4.79391	4.48737	3.43985	4.26182	6.48597	4.45951	7.04886	3.71151	5.63671	7.60747	8.9273	5.55851	4.6402	10.1437	8.09098	7.84385	8.20423	4.56421	5.6111	6.70716	6.93072	8.83028	4.7982	6.05871	7.31654	7.89853	6.06278	6.6665	4.80692	2.26754
KIAA1539	89	1.94128	3.33934	2.93141	3.68846	2.77971	5.29426	2.87453	5.70271	2.00196	1.97474	2.40569	4.38763	3.27276	3.16191	2.24667	2.63749	5.70023	6.09847	4.54339	6.89562	4.77628	5.74288	5.79064	5.15169	3.43939	4.65968	4.74521	4.00675	6.17463	4.81814	4.36318	7.31379	3.21593	6.01841	5.20598	6.63035	5.65933
COPZ2	90	3.38477	1.55771	1.23283	1.02677	7.42099	1.60105	0.276145	0.270609	0.950129	1.73216	16.5203	0.263977	1.13501	2.06651	1.89694	1.63089	0.32904	1.42864	0.276408	0.344427	3.15081	0.201506	0.832958	0.212045	1.70671	1.19063	2.57294	0.187574	1.56443	2.76159	1.41035	0.185892	0.439481	2.33364	0.72045	0.714186	0.296326
PRKAR2B	91	25.0158	26.9465	42.2971	35.515	37.4025	59.9287	27.0418	61.218	29.9124	31.6361	33.3368	40.2274	55.1481	23.8128	35.6324	26.7746	18.1827	19.7243	32.4762	70.958	56.035	28.8805	17.3838	35.6749	31.9581	24.3792	22.1895	17.9042	18.9865	28.7806	43.825	56.8384	27.0076	72.4613	61.4676	58.7197	122.698
MSL3	92	4.26898	3.89757	4.43171	4.43093	4.0038	3.70892	3.69887	5.04458	4.4454	5.32913	5.45812	4.48292	4.19864	4.89868	4.64758	3.94135	3.3614	3.82441	3.61492	4.73431	3.84739	3.3683	2.8344	3.36976	3.56347	3.88662	2.76446	3.26304	3.7476	3.23266	6.5095	6.01244	4.8892	5.21469	4.1217	5.30912	8.30283
CREBBP	93	7.38707	21.3733	9.17854	11.265	14.9922	22.1622	14.4615	9.08	5.11786	2.97415	1.89939	19.0465	11.4983	7.22864	6.81261	16.9492	27.9254	27.7122	20.0865	18.944	24.086	20.2786	29.7648	21.2426	28.3784	18.3543	30.5455	21.1725	27.9814	26.6971	10.8769	22.2304	17.373	22.0002	22.4407	22.5847	7.55491
BZRAP1	94	1.06072	3.61763	1.6827	1.37956	1.90118	6.63953	1.56188	1.63813	1.33804	1.08437	1.00324	3.81716	2.4026	1.83607	1.34991	2.37726	5.70899	6.02514	2.54923	4.12326	6.07733	4.85224	4.67745	4.93927	3.42015	2.42987	4.13045	2.09491	5.55778	3.85239	2.47083	5.05537	2.00918	5.38919	6.01969	4.81596	1.52399
MPO	95	0.29319	0.253277	0.462297	0.338995	0.181821	0.722534	0.212473	0.25737	0.257741	0.529458	1.16781	0.227059	0.370257	0.891765	0.267057	0.267398	0.074068	0.184491	0.415666	0.477005	0.941961	0.233647	0.146854	0.441523	0.118697	0.274835	0.313319	0.241602	0.206696	0.130454	0.308684	0.253611	0.263107	0.07456	0.529688	0.247311	0.308409
PON1	96	0.012047	0	0.027798	0.011205	0	0.070052	0.012631	0.108474	0	0.005527	0.068217	0.008983	0	0.108136	0	0	0	0.013489	0.015699	0	0.028467	0	0.012605	0	0	0.027363	0.012005	0.02478	0.007069	0	0	0.013885	0.039588	0	0	0	0.014923
C2orf3	97	4.72004	4.4869	2.38475	3.25755	2.95215	2.04067	3.65914	2.243	4.54143	4.11869	3.36573	2.9822	2.88198	4.38996	3.13564	3.60964	5.06963	5.49785	3.86218	2.13015	2.32361	4.23844	5.84391	4.56841	4.67389	5.27981	6.08127	4.94764	4.8217	4.43055	3.08357	1.77906	2.87338	2.21902	2.94348	2.50538	2.41336
WDR54	98	19.7036	12.2702	12.8279	11.2414	10.5779	7.40121	12.0262	12.6246	19.2741	18.9121	14.872	10.384	12.3026	20.233	14.5452	14.4557	15.2751	17.347	11.1535	12.7667	6.99115	12.3147	14.2347	10.2274	9.74221	18.5036	12.5122	14.0619	17.8998	10.0674	15.0368	11.2208	13.1374	9.44578	13.0024	11.9144	9.68105
CROT	99	1.42283	1.16164	1.02729	1.66048	1.17023	0.989381	1.53205	0.667329	1.3603	1.52554	2.13164	1.90766	1.07294	1.68288	1.58088	1.08753	1.15812	1.19098	1.61077	0.595314	0.986928	2.82855	1.12713	2.03841	0.864591	1.29477	1.26782	2.24557	1.17839	1.12515	1.91488	1.21932	2.34238	0.858601	0.699838	1.47349	1.94362
ABCB4	100	0.402528	0.422735	0.266927	0.27769	0.178686	0.216596	0.298458	0.122247	0.744274	0.275775	0.496475	0.26921	0.153936	0.858617	0.263219	0.297967	0.570739	0.486263	0.230664	0.10814	0.216198	0.458553	0.505813	0.360059	0.260248	0.528934	0.588784	0.496923	0.813531	0.278731	0.20347	0.078055	0.2311	0.029864	0.050671	0.061332	0.061147
MLL5	101	7.39036	20.4062	13.537	13.3962	16.9013	18.621	15.602	13.3685	8.04027	5.61267	5.50214	18.9304	15.5329	9.42868	10.0779	15.7806	27.55	26.3321	22.2943	20.4358	20.575	23.315	27.6915	25.1086	29.7848	19.1078	26.0699	18.1333	23.7713	27.4696	11.7368	19.1366	15.3897	25.3471	22.3763	21.3126	9.53277
RHBDD2	102	30.9338	22.1479	41.3713	29.1288	30.2046	37.9589	24.3776	40.0625	27.1885	26.7451	30.1366	27.5448	37.9665	33.7507	26.9159	25.7178	25.737	31.4921	33.878	52.7109	38.0831	25.8696	27.851	28.5347	22.9331	38.6755	26.8813	29.9873	35.1294	25.0931	38.3295	55.3144	33.9789	31.8738	35.5164	32.715	33.9699
SOX8	103	16.384	16.7173	43.2706	54.6778	11.8171	8.76878	39.0958	1.95283	14.7933	12.5877	7.27147	39.1275	11.325	6.94605	15.0174	17.4197	29.3677	23.3251	23.232	0.930193	7.7034	32.9439	37.9432	35.8423	14.0826	15.7537	21.1359	42.5523	28.7405	15.9641	11.2042	57.6125	39.1401	1.54127	0.96811	1.64418	6.59278
IBTK	104	6.14173	6.64535	6.65641	6.45195	6.6825	6.14399	6.65612	5.90913	6.81417	5.82202	6.48528	7.00763	7.3607	7.14086	6.64915	5.76972	5.35946	5.68086	6.42836	5.11419	6.0282	5.90081	5.7983	6.38328	7.26938	6.30971	6.32768	4.99816	5.17844	6.46077	5.33026	6.24647	5.3667	5.59181	6.31427	6.26599	8.68343
ZNF195	105	9.04839	8.99169	8.60051	8.57086	9.68499	6.79498	8.05323	7.10893	8.65255	9.5874	7.12942	8.18819	10.0207	7.90423	9.56409	8.278	7.56421	6.76196	7.75464	6.71398	7.04732	7.51148	6.00314	7.75236	9.51882	7.48005	9.2714	7.33099	6.25849	9.05966	10.4084	8.92156	8.31065	10.3795	10.7054	11.9658	10.2421
MYCBP2	106	2.05177	6.66362	6.2404	4.10562	5.82848	9.69973	4.19802	3.71618	2.06147	1.1711	1.25895	7.73792	6.42081	2.15556	2.43114	4.51523	6.56209	6.05356	8.51719	11.4542	12.8153	7.29389	6.11118	9.71957	10.0527	5.44808	7.29221	4.79758	5.82109	8.99216	4.75956	14.0828	7.0938	12.2508	8.51406	12.3725	6.24158
FBXL3	107	10.1328	8.98489	8.17325	11.3405	9.83549	7.90127	11.6857	10.8497	12.069	12.2392	15.3522	9.88377	10.3507	11.2886	12.2407	9.42906	7.09385	8.26596	12.2733	7.02521	8.28902	10.4456	9.55442	10.9271	9.32398	9.59593	8.49146	12.8546	7.16414	9.17558	13.7818	9.50727	15.1971	10.3362	9.0456	10.0572	17.1191
ITGAL	108	0.048085	0.055549	0.066948	0.025569	0.129434	0.201049	0.027458	0.062094	0.051671	0	0.080034	0.045455	0.039071	0.166739	0.062324	0.034925	0.101336	0.093397	0.05429	0.082267	0.309065	0.06099	0.100334	0.065389	0.074755	0.195451	0.14536	0.072234	0.101752	0.118024	0.085403	0.088409	0.098234	0.147096	0.255146	0.163567	0.01697
PDK2	109	10.6972	9.34672	12.5491	10.2532	11.4556	12.5145	9.41394	5.70229	7.09186	8.12458	9.67842	9.78608	12.2899	9.22801	8.32328	10.3671	10.8602	11.7057	12.0565	10.3254	14.2527	9.65042	10.597	9.95806	10.8285	12.5222	10.2135	11.6937	11.7017	10.8349	12.141	20.1078	12.4189	15.1487	16.6425	13.567	7.50608
ITGA3	110	0.698438	0.767641	1.76071	0.885867	1.42096	3.398	0.584784	1.62718	0.598593	0.320443	0.857818	1.09724	1.76246	1.34447	0.533899	0.693175	1.03108	1.34198	1.51512	4.26273	3.98936	1.04937	0.657745	1.59445	1.18636	1.91389	1.07602	0.476661	1.60376	1.16954	1.93769	3.09268	1.02329	3.4961	3.09978	3.45438	2.27172
ZFX	111	3.53012	4.57345	2.86425	3.37758	3.26936	2.34111	3.64095	2.41303	3.26952	2.5917	2.8634	3.39974	3.44584	3.11433	3.06644	3.27337	3.68402	3.23369	3.17969	1.9948	2.48489	3.1838	3.66854	3.45287	4.3494	3.29294	4.45501	3.42364	2.94028	3.94518	4.26812	4.89775	5.94507	4.73515	5.0138	5.6296	4.33883
LAMP2	112	8.99116	7.66659	5.39309	9.44689	7.70848	4.98511	8.15291	6.21174	9.53808	8.70141	11.9478	7.51323	6.53877	11.094	8.62819	7.90888	5.94213	6.71112	7.56194	5.53727	5.97723	7.37556	8.08116	9.39283	6.96709	8.89602	6.97368	8.87279	6.61981	7.05971	7.72213	2.85924	6.72376	3.57376	3.10876	4.03116	7.51463
GGNBP2	113	7.60883	9.4423	7.74909	7.93889	7.85477	6.88593	7.90114	7.5307	6.81462	7.51646	7.9112	8.66008	7.27316	6.36696	8.07662	8.37214	8.00079	7.29053	6.93629	7.07529	6.2345	7.22465	7.83981	7.28481	9.03058	6.29345	9.71894	7.26958	6.63477	9.94088	6.5306	7.75738	6.66971	7.49305	8.38445	8.44265	7.89684
ITGA2B	114	0.885593	0.584396	0.412002	0.70361	0.477327	0.498262	0.528312	0.331911	0.384744	0.711642	0.773588	0.49428	0.348742	1.42246	0.476524	0.623693	0.640474	0.815031	0.406592	0.241988	0.50018	0.667029	0.880608	0.533871	0.799298	0.988161	1.01321	0.835703	0.705843	0.626341	0.445232	0.30995	0.233946	0.184228	0.82786	0.365062	0.331666
ASB4	115	0.007835	0.023829	0.06341	0.028953	0	0.036623	0.030782	0.682397	0.039316	0.031919	0.074863	0.042999	0.014864	0.585761	0.010155	0.008045	0.026681	0.071145	0.010351	0	0.009321	0.009957	0.032682	0.018764	0.010708	0.032908	0.008755	0.009174	0.074682	0.025887	0	0.009154	0.025864	0	0.016656	0.007774	0.009706
GDE1	116	32.5937	25.6227	25.5774	23.9408	27.7063	18.5024	22.9813	15.4117	25.0933	31.548	31.3875	22.0348	29.0288	26.2947	26.9031	28.1509	18.9929	17.5553	19.0683	13.4807	19.0046	15.5383	17.6921	16.2246	21.5815	22.482	20.1493	16.8317	18.9196	21.782	21.8406	22.7148	21.8088	20.6844	22.5751	20.764	17.3656
C19orf60	117	25.5581	20.3723	22.2504	20.8187	20.4356	49.0443	21.3706	29.9649	26.7091	32.2043	36.4912	21.5079	21.5693	28.2483	26.8826	22.1013	16.5945	13.5075	13.1434	17.2637	22.0319	15.3644	14.6767	11.2732	8.59806	10.9767	11.5941	15.683	14.595	12.0758	21.4109	17.3362	20.5951	26.005	22.7111	12.3087	18.4362
CRLF1	118	0.258258	0.040447	0.141719	0.129381	0.249436	2.64443	0	0	0.27427	0.216353	2.14602	0.185345	0.226564	0.564786	0.246335	0.107954	0.112916	0.090266	0.326571	0.152946	0.962714	0.383709	0.042311	0.167211	0.026894	0.092621	0.122899	0.023359	0.527045	0.065614	0.282449	1.01546	0.180949	0.318035	0.21977	0.298512	0.119224
OSBPL7	119	0.880399	1.37473	0.714994	0.769956	1.02365	1.34322	0.700246	0.44635	0.446542	0.496695	0.512206	1.31057	0.76687	0.597656	0.573609	0.986608	2.25827	2.18939	0.711486	1.2203	1.2241	2.52217	2.11616	2.32678	1.63116	0.924354	1.4743	1.45334	1.94227	1.69198	1.0095	1.97274	0.901108	2.40315	2.70064	2.09731	0.738014
TMEM98	120	95.3984	60.9801	44.9631	73.1841	46.4645	23.153	67.5421	29.9509	89.225	108.896	85.501	54.7927	45.7801	74.2478	72.0288	68.7625	62.514	59.6534	50.4861	14.1613	21.2842	54.1896	64.5468	44.8625	34.1887	54.544	41.721	72.8994	56.3579	37.5395	64.4287	27.6717	82.4028	21.0063	30.7593	21.6056	17.7219
YBX2	121	0.068386	0.023006	0.082664	0.084143	0.141233	1.53718	0.109335	0.789268	0.198895	0.123266	0.438038	0.14857	0.364779	0.430044	0.058032	0.093206	0.101993	0.333459	0.358531	1.05605	0.964547	0.086519	0.070914	0.298538	0.062026	0.549827	0.278241	0.026572	0.43131	0.17461	2.15607	0.211395	0.174796	0.236306	0.095829	0.357225	1.06752
KRT33A	122	0	0	0	0	0	0	0	0	0	0	0	0	0	0	0	0	0	0	0	0	0	0	0	0	0	0	0	0	0	0	0.034577	0	0	0	0	0	0
MAP3K14	123	0.850696	1.83254	0.54474	1.06836	1.15585	2.1102	1.22501	0.555429	0.406514	0.500412	0.322248	1.80898	0.84186	0.685594	0.643621	1.36171	2.51554	2.76179	1.26323	1.31954	2.31083	1.76518	2.33599	1.34573	1.81821	1.505	2.372	1.58996	2.8737	2.05233	1.01542	3.03873	1.46846	2.24482	2.44542	2.73145	0.745645
ABCC8	124	0.172209	0.362702	0.298954	0.28103	0.24591	1.26676	0.194259	0.592178	0.144291	0.113261	0.135488	0.443598	0.361612	0.389815	0.175691	0.246271	0.223218	0.348919	0.179445	1.36999	1.56298	0.184002	0.203383	0.405182	0.132235	0.247917	0.082082	0.079443	0.327898	0.130898	0.684781	0.479187	0.281347	0.689697	0.510754	0.312416	0.465219
CCL18	125	0	0	0	0	0	0	0	0	0	0	0	0	0	0	0	0	0	0	0	0	0	0	0	0	0	0	0	0	0	0	0	0	0	0.023651	0	0	0
CCL3	126	0.072448	0.048964	0.029456	0.044923	0.176256	0.537623	0.094876	0	0.212067	0.139596	0.156653	0.053302	0.137444	0.254283	0	0.099187	0.027412	0	0.095277	0.086899	0.199931	0.061381	0	0.057834	0.098117	0.051059	0.188524	0.056554	0.02523	0	0.267556	0.197508	1.16491	0.188248	0.255639	0.334492	0.178287
SYNRG	127	3.74604	5.8776	5.9513	5.38941	6.1004	5.75205	5.08753	5.21912	3.16408	2.56221	2.4987	6.02884	6.13418	4.06022	3.87497	4.86789	6.49892	6.30688	6.46821	8.60515	7.28759	5.14858	6.33376	5.93983	7.22388	6.30696	7.4462	5.52374	6.47721	7.05417	4.63616	4.64175	4.75435	5.1058	5.20501	7.15311	4.03619
CACNG3	128	0.128526	0.981384	1.94822	0.553659	5.99688	3.722	1.57934	0.07931	0.175299	0.110424	0.256877	0.977364	3.57375	0.036959	1.19435	0.670232	1.13917	0.515251	2.26442	0.153784	5.44858	1.39359	0.402952	1.6912	7.95002	0.690374	1.22371	0.177856	0.123578	5.60108	0.708267	6.3304	3.10598	14.9887	12.4765	6.6961	0.70808
TMEM132A	129	26.3704	24.7295	26.4913	15.1617	34.8694	38.715	18.7229	97.6726	16.273	19.3213	16.8285	20.7778	29.4769	32.5974	26.1375	27.8129	17.6869	15.3964	14.9925	34.8819	20.4272	12.2746	15.2963	11.6836	16.3723	16.6985	18.6208	9.76407	16.7011	17.4011	26.9686	24.9018	22.4667	50.2687	66.2866	49.473	25.7379
AP2B1	130	70.3371	74.5221	120.192	85.4279	89.5781	89.2023	73.6622	95.8846	69.3824	66.4759	66.6874	85.4454	115.553	76.1311	76.4313	76.1956	85.7241	85.2912	108.226	180.839	145.065	79.5075	75.7022	98.0301	99.8082	111.557	82.0082	83.5924	91.5122	101.148	101.054	102.839	75.101	103.018	91.9872	127.889	125.908
TAC1	131	0.076001	0.538289	37.5415	34.3387	7.04541	23.7366	9.62356	26.2616	2.32734	0.37854	5.5183	63.1835	11.2146	3.24367	3.63675	0.232792	0.050592	0.707078	5.55135	19.1277	23.1928	30.3939	0.127237	13.9	0.354546	1.40562	0.168117	3.99314	0.359072	0.09193	0.625686	66.4194	3.07755	0.37041	0.220708	1.53402	39.1063
ZNF263	132	8.58325	8.42141	8.54158	7.70967	8.1912	8.0675	7.60643	6.33528	8.05643	7.43823	7.57502	7.68359	7.88138	8.1697	7.66232	8.21137	10.8195	9.73251	9.42619	8.64605	11.524	8.11136	9.20042	8.31127	10.2361	9.34002	9.35603	8.46873	9.78585	10.1157	10.5714	12.3358	10.7892	13.078	12.1482	8.85771	10.6021
CX3CL1	133	2.67478	2.105	7.45546	3.84505	5.3738	7.43642	3.8573	1.91987	1.52921	1.41883	2.1595	4.21429	8.66761	6.04327	1.79025	2.89269	2.5301	3.38345	6.73653	2.32102	6.63661	3.85595	3.12935	6.55116	3.68535	6.50559	3.07488	4.24031	2.5809	1.98838	5.24053	12.6279	7.39712	2.35499	1.23778	1.06851	2.38422
SPATA20	134	2.46364	1.78344	2.92923	2.13833	2.98353	2.89731	1.71242	5.45184	2.54032	2.41368	4.42211	2.23226	3.27248	4.73301	2.22583	2.47365	2.35038	2.65939	2.8286	8.71262	4.63511	2.66559	2.46644	3.33892	1.87925	4.15208	2.12068	2.28107	2.95238	2.13914	2.88257	4.27612	1.79104	2.1631	1.89009	1.67636	3.39666
CACNA1G	135	0.863075	1.25563	1.71206	0.941948	1.42804	7.80629	0.509742	4.12146	0.479642	0.219871	0.997181	1.56001	1.98078	1.66617	0.51718	1.47914	0.521621	0.675863	2.34158	15.1979	13.2491	1.45903	0.470477	2.16175	1.9447	2.69554	2.9459	0.515463	1.0234	1.36018	0.866733	6.88795	1.31888	0.813371	0.921263	0.239231	2.91574
TNFRSF12A	136	1.00184	1.16455	0.592611	0.387092	0.524311	0.770067	0.54748	0.94165	1.35071	1.69163	0.901519	0.300303	0.197834	2.99573	0.625461	0.887541	4.56592	3.265	0.686621	0.664084	1.44381	0.969256	3.26403	0.416035	0.236767	3.62522	0.887451	1.09204	6.81093	1.25682	1.84828	0.120463	0.381797	0.240897	0.292731	0.069135	0.857337
DLX6	137	0.07326	0.719747	27.6837	19.7025	2.32913	0	12.7517	0.106559	0.367439	0.056272	0.664943	15.9439	8.3892	0.044139	0.934511	0.257619	0.236952	0.77904	12.2268	0.012553	0.01245	14.4898	0.207767	14.5342	0.370514	0.165808	0.105247	9.9715	0.287434	0.368211	0.581858	33.4737	12.8327	0.376945	0.192862	0.271115	3.08796
MAP3K9	138	0.766696	2.29281	2.32311	1.23535	2.63554	4.50538	1.31947	2.08638	1.02034	0.49526	0.445124	2.11603	3.00319	1.37883	1.16401	1.9722	3.17405	2.88676	3.16284	6.15107	5.65441	2.16178	2.06984	2.76162	4.11621	3.77511	2.59622	1.2183	3.91499	3.65348	2.4038	3.74934	1.85154	4.84465	4.86686	7.23319	2.01509
RALA	139	39.7856	30.9759	29.8148	39.0305	33.3366	25.8142	35.4648	36.4618	41.4133	45.0677	40.4057	33.4453	35.1559	35.9993	41.4945	32.0802	23.5712	24.5019	30.8297	27.5104	30.0317	24.8988	24.8046	29.2818	31.3044	29.7906	25.7213	30.4387	23.834	30.0895	40.5841	24.1117	32.6728	26.3705	23.7416	32.6257	65.4928
BAIAP2L1	140	0.209117	0.328379	0.227604	0.318353	0.21644	0.32689	0.170527	0.576522	0.318188	0.144603	0.747457	0.283827	0.243671	0.843675	0.07453	0.187335	0.368605	0.596387	0.198684	0.558222	0.272651	0.281094	0.395064	0.390537	0.382799	0.693545	0.556169	0.263621	0.894155	0.370141	0.329317	0.346227	0.230998	0.558041	0.415861	0.448692	0.242725
JHDM1D	141	4.33391	3.9867	3.67944	4.31228	3.93741	5.04085	4.66925	5.82299	2.87189	3.40766	3.3216	3.61799	4.63502	4.03235	4.3314	3.72325	3.46841	3.82346	4.75938	3.31106	4.21872	3.20713	3.70303	2.80333	5.21628	5.2984	5.31993	3.7179	3.56302	4.49705	2.71734	1.76579	3.49667	2.24996	2.11561	2.74677	2.03365
ETV1	142	1.91865	4.67628	5.23718	5.14509	3.44321	6.02139	3.14584	2.04419	6.54024	7.25055	27.481	8.01642	5.77459	2.66276	7.11566	3.90335	8.46618	12.2345	5.17197	1.70744	4.39035	6.11306	9.46534	9.09296	3.82143	1.93805	4.12638	3.69109	5.46483	4.52174	10.4515	5.34194	10.8525	4.77043	3.58016	19.4071	4.78927
AGK	143	4.60569	3.95758	5.64081	4.79701	4.18049	3.85996	3.87177	3.70833	4.36153	4.28129	4.08522	4.4118	5.57625	4.1579	4.01572	4.00884	4.46208	4.38562	5.03891	4.48392	4.87841	3.87562	4.35808	4.80359	4.12743	4.70128	4.41248	4.05286	4.45742	4.08558	4.28128	5.94921	4.49687	5.06677	4.33563	4.66201	5.00649
ALDH3B1	144	0.228096	0.112	0.053865	0.012528	0.148841	0.289113	0.079303	0.024481	0.061218	0.117941	0.175606	0.041588	0.071773	0.274802	0.105893	0.133619	0.080373	0.089809	0.064563	0.03911	0.244812	0.08484	0.156493	0.045653	0.06679	0.146204	0.139319	0.113073	0.084655	0.109756	0.134817	0.089436	0.178503	0.098087	0.104908	0.056015	0.060726
TTC22	145	0.017721	0.006043	0.028983	0.049822	0.012478	0.027956	0.023339	0.006743	0.022332	0.032377	0.030932	0.039202	0.001757	0.043994	0.007726	0	0.006766	0.033828	0.007874	0	0.035454	0.037876	0.006237	0.02855	0	0.018904	0	0.034803	0.020474	0	0.014764	0.096558	0.032795	0.005178	0.006335	0.005914	0.014669
PHTF2	146	4.25511	4.78835	3.24274	4.76869	4.30236	2.80062	4.27004	4.09396	4.82613	4.64644	4.68649	4.44208	4.69082	4.61184	4.80905	4.12525	3.6164	3.57252	3.79919	2.68155	2.72827	5.57863	4.22612	5.64647	3.56698	2.91012	3.23897	3.97879	3.03362	3.85226	5.21593	3.23837	4.10778	4.87566	3.84611	4.03617	8.91349
CCL26	147	0	0	0	0	0.1058	0	0	0	0	0	0.066015	0	0	0	0	0.051542	0	0	0	0	0	0	0	0	0	0	0.211292	0	0	0	0.062166	0	0	0.087812	0	0	0
FARP2	148	1.22379	1.81563	1.24735	1.26062	1.55995	1.4073	1.33622	1.45685	1.17985	0.904836	1.17034	1.55556	1.21191	1.27572	1.26745	1.35834	1.92041	1.95979	1.30971	1.78408	1.4125	1.58014	2.15656	1.6722	1.64989	1.68793	1.96316	1.38767	1.94047	1.64338	1.49397	1.26667	1.10997	1.76201	1.88581	1.57885	0.83567
USH1C	149	0.101302	0.323938	0.053334	0.027236	0.030236	0.017052	0.00719	0.00817	1.54697	0.638789	1.69518	0.008079	0.020739	1.54689	0.141046	0.147291	1.31845	2.15593	0.00954	0.008544	0.026008	0.018607	0.449142	0.008647	0.059351	1.36636	0.212459	0	3.89628	0.216378	2.83642	0	0.039842	0.012634	0.023238	0.007264	0.008946
GGCT	150	18.3912	13.6674	9.06735	9.95743	10.9064	6.58986	14.2889	12.709	20.6091	21.0174	16.0186	11.0086	9.3693	17.5436	15.9171	14.8385	8.6051	8.29438	7.38249	5.44982	4.38495	6.17489	8.58955	5.20425	8.44206	9.19232	11.011	7.49236	8.03159	10.3992	9.63412	2.57472	7.13378	4.07883	4.80765	3.8189	11.1684
DBF4	151	8.91261	6.29465	3.2252	6.98585	3.88576	1.18712	6.83948	3.77497	7.72989	7.99114	4.70538	6.43849	3.51866	5.50126	6.15473	6.41048	4.20448	5.00379	3.90382	1.18456	1.00659	5.00082	5.3656	5.09848	3.69578	3.323	5.16454	5.30824	4.11301	3.66567	2.69984	1.11599	4.40068	0.826282	0.628903	0.680393	0.847644
TBXA2R	152	0.471336	0.983595	0.692671	0.391312	0.928602	0.665873	0.421871	0.297155	0.49768	0.733494	0.695166	0.419602	0.486576	1.25982	0.855619	0.833184	0.219626	0.282391	0.18229	0.149546	0.393872	0.21158	0.130651	0.298806	0.36665	0.472706	0.248038	0.302073	0.220204	0.412548	0.360826	0.259357	0.289648	0.465984	0.587061	0.440511	0.292182
IFRD1	153	5.055	5.88408	6.18111	5.26023	6.10605	5.99551	4.8434	9.19645	5.48093	6.11106	5.28769	5.50963	6.92577	5.92005	6.86395	5.62331	6.00085	5.98771	4.36473	6.73115	4.8707	4.83268	5.46609	4.74293	6.78014	5.81848	5.12165	3.56792	5.67238	6.71458	8.97593	7.29448	5.32673	7.08178	8.11136	11.1698	15.0599
LGALS14	154	0	0	0.081078	0.061409	0	0.116385	0	0	0	0	0.086238	0.146219	0.062627	0	0	0	0	0	0	0	0	0.042238	0	0	0	0	0	0	0	0	0	0	0	0	0	0	0.122963
COX10	155	3.90723	4.0902	4.9946	4.17643	3.84781	4.82428	3.78805	3.1464	3.07202	3.2177	3.53213	3.8552	3.90912	3.64782	3.2663	3.85421	4.28965	4.11396	4.58887	5.68318	5.73608	3.7765	3.82314	4.70609	5.78186	3.93203	4.39673	4.19256	4.0853	4.96983	3.64641	5.55306	3.79274	4.9435	4.74144	4.86323	3.40888
GTF2IRD1	156	5.72002	7.6436	6.94246	7.37155	6.64167	8.58271	7.36509	6.2384	4.24168	3.82166	3.32728	8.42641	5.69312	4.99076	5.05112	6.63501	9.28599	9.02855	7.0916	5.76114	7.82212	8.0459	9.4663	7.40384	7.98006	6.0054	9.57208	7.41285	7.97861	8.36047	3.83338	9.24483	6.78959	7.52739	7.85967	6.96576	2.63536
PAF1	157	35.6957	38.2528	38.3493	35.2217	38.085	45.1579	39.9752	38.4731	40.2467	33.9561	34.8201	40.6598	31.7558	34.9774	38.9097	38.0224	35.3815	31.8132	30.6688	24.9812	28.7967	26.6334	30.6194	24.882	28.2532	29.8955	35.0011	33.6209	31.374	31.1547	28.596	33.4233	33.6017	27.2598	29.046	28.272	14.7046
VPS41	158	10.3325	12.0919	10.6698	10.2995	13.1884	9.33088	10.7938	9.48581	9.93215	10.1181	10.2278	10.7069	13.5047	10.7503	11.4236	11.7338	11.0352	10.3948	10.8753	11.0988	11.0175	9.98053	10.631	10.6292	15.3949	11.8759	12.03	9.18491	9.9655	13.7618	11.9732	8.62382	9.28555	11.0924	10.9883	12.0553	11.1286
ARHGAP44	159	2.7555	4.34969	2.57058	0.959207	5.36944	4.7288	1.7372	1.55712	2.87373	2.3552	2.98834	1.95253	3.88276	2.22971	3.76362	4.32575	4.16658	3.51637	1.87938	2.61842	3.29078	1.49206	2.32923	1.68325	5.24604	3.31172	4.33805	0.950332	4.07439	5.38625	2.97194	4.19766	1.8854	10.0628	14.3693	14.8444	2.85119
ELAC2	160	10.5247	10.5303	8.50171	8.80724	10.0601	7.94153	9.75389	8.1211	10.5832	9.65065	7.93205	9.06804	8.22299	10.6232	9.83354	10.3741	9.24155	8.15149	7.58297	6.32491	5.99066	6.92879	9.52955	6.10525	7.29891	9.06983	8.68916	9.51871	10.1802	7.77194	8.19237	7.40799	8.63927	8.17392	9.09384	8.60739	3.79197
SCIN	161	0.098682	0.059927	0.16487	0.046295	0.126164	0.075069	0.020992	0	0.017754	0.038698	0.936025	0.101678	0.060365	0.276819	0.082483	0.036181	0.064368	0.112773	0.121715	0.109936	0.210044	0.153306	0.029617	0.160587	0.135913	0.112464	0.142323	0.057831	0.096151	0.140277	0.22833	0.141056	0.224694	0.098608	0.224305	0.070307	0.114496
ARSD	162	1.52092	2.29313	1.28669	1.71538	1.45784	2.03087	1.21743	1.27106	2.36399	2.24	2.30742	2.00944	1.23305	3.19082	2.05731	1.9992	3.1782	3.21342	1.40869	1.69083	2.09101	2.40089	2.53104	2.03852	1.36234	2.37894	1.92287	1.78153	3.16862	1.93577	3.27428	2.25353	2.14129	1.06477	1.28431	2.21825	1.87891
PNPLA4	163	3.31244	2.31997	2.56322	1.71867	2.86469	2.99533	1.70754	2.38028	3.42543	3.01383	3.98395	1.73756	2.49475	4.01718	2.99843	2.90429	1.90611	1.92158	1.85613	2.159	2.30052	1.51216	1.70476	1.51038	1.93639	3.36004	2.2262	1.11149	2.6959	1.86479	5.19815	2.89786	2.62546	2.70473	4.00052	3.53022	4.60554
MYH13	164	0	0	0	0	0	0	0	0.013174	0	0	0	0	0	0	0.007445	0	0	0.006787	0	0.002076	0	0	0.003293	0	0	0	0	0	0	0	0	0	0	0	0	0	0
ADIPOR2	165	15.461	16.1692	11.6014	13.3598	14.3502	8.11169	14.2174	6.90983	14.3632	13.302	12.2565	12.5931	12.7155	13.8692	13.7038	15.5336	15.0711	14.1169	14.7859	6.38275	9.27607	11.2098	16.987	11.703	17.1517	14.907	15.2785	15.2334	13.2394	16.3628	11.9373	9.47558	13.5743	10.486	10.9368	8.73055	6.39745
CDKL3	166	13.7486	9.13233	11.9682	9.72045	9.14631	7.67028	9.95121	11.3029	13.1185	14.0362	10.7213	10.1898	10.687	11.2261	11.5895	10.9022	8.89688	8.97035	10.4841	11.3244	9.1225	8.35268	8.73169	8.30974	8.30406	9.85369	8.89944	9.8765	7.94123	9.31661	8.98607	6.88346	8.4628	7.66658	6.30966	7.47686	9.42576
UPP2	167	0.034049	0.026607	0.180181	0.024412	0.103204	0.169259	0.025604	0.033705	0.032036	0.0354	0.138502	0.052645	0.166366	0.063387	0.101595	0.053899	0.060993	0.105877	0.162116	0.145707	0.436475	0.14942	0.095932	0.164357	0.256166	0.095236	0.073317	0.04589	0.069867	0.180072	0.190415	0.220249	0.088592	0.360191	0.313645	0.131265	0.304488
PRSS21	168	0	0	0	0	0	0	0	0	0	0.041329	0.07897	0	0	0	0	0	0	0	0	0	0.036701	0	0	0	0	0	0	0	0.032233	0	0	0.036046	0.033948	0	0.032792	0	0
MARK4	169	7.21349	12.8646	13.562	10.8156	15.401	24.8504	12.109	14.9948	7.96909	7.10161	7.65184	13.7921	12.9241	8.87622	9.77768	12.0751	13.9816	14.1532	13.8498	20.0951	21.7365	11.1203	12.189	12.6228	13.0457	13.3128	13.1811	11.6468	15.8232	14.4199	10.2683	17.8558	10.7166	17.5929	17.4813	15.9866	8.18929
PROM1	170	6.68119	6.37878	5.15921	9.38102	4.0692	2.3381	10.6796	2.48961	7.09855	4.84277	3.18033	7.82413	3.84139	8.96683	4.72405	6.1337	5.18606	5.29755	8.39416	1.54593	2.46545	7.88311	6.82887	7.2856	5.07957	7.09932	5.9401	11.4957	6.29	4.99509	3.84699	0.993697	5.88971	1.68713	0.573703	1.0659	1.73734
CCDC124	171	62.8027	63.348	60.8636	61.8592	64.8029	86.3119	69.5301	74.1048	76.4416	76.6851	75.0078	68.7706	55.887	71.1802	75.7189	69.6387	44.4412	42.8791	41.1637	42.8102	52.5443	34.4487	39.8276	30.0448	24.1564	47.3458	41.6629	52.9759	47.6252	35.7058	53.8832	54.4048	60.0255	45.4828	51.4972	41.9289	34.8857
CEACAM21	172	0.127443	0.1856	0.138304	0.162405	0.372575	0.469738	0.15013	0	0.177265	0.38011	0.57644	0.070534	0.282316	0.272806	0.238791	0.291369	0.112758	0.0968	0.513215	0.222137	0.545733	0.057004	0.059624	0.170583	0.077875	0.254393	0.015918	0.100085	0.225293	0.109401	0.158548	0.164195	0.139387	0.172928	0.270913	0.225207	1.26708
PAFAH1B1	173	61.8315	67.8462	64.3905	57.4511	70.873	60.7588	53.2832	65.2159	59.2958	61.0986	54.9266	65.4674	81.4032	58.8197	68.5242	66.9778	35.9598	38.8656	37.3382	53.981	53.1562	33.7552	32.2689	41.2875	49.8249	43.7299	42.9792	24.7	38.383	44.0363	68.632	69.5568	52.3431	71.5747	72.3959	92.3241	79.1459
NOS2	174	0.52477	0.677333	0.465357	0.362692	0.541789	0.403807	0.533089	0.372646	0.233958	0.345189	0.734235	0.365041	0.449534	0.553795	0.422902	0.630972	0.480991	0.538432	0.347844	0.335612	0.301842	0.442211	0.516024	0.4005	0.305936	0.668884	0.589591	0.536813	0.593883	0.456002	0.37766	0.357096	0.325016	0.294773	0.534846	0.720727	0.401487
DNAH9	175	0.059661	0.056278	0.104116	0.061942	0.055663	0.179428	0.075053	0.034022	0.091716	0.03877	0.077402	0.101426	0.117089	0.432275	0.012391	0.077399	0.058011	0.107812	0.159429	0.101725	0.182192	0.198427	0.082466	0.197089	0.092473	0.208946	0.068402	0.209006	0.110378	0.060495	0.341425	0.165008	0.203045	0.058192	0.106469	0.038907	0.130114
KIAA0100	176	27.9644	29.3724	28.3807	28.387	26.6448	19.1711	27.6511	16.6515	26.9475	23.2363	21.8976	27.1965	25.5472	29.5993	24.1108	28.7796	30.4744	30.5977	31.8184	23.6194	26.7099	27.7838	33.6724	28.2797	30.7066	33.843	29.7858	32.7683	34.077	30.0651	22.0174	24.2943	25.0002	23.0046	27.568	31.1909	11.1475
SLC13A2	177	0	0	0	0	0.012097	0	0.011351	0	0	0	0	0	0	0.048742	0	0.03544	0	0.013118	0	0	0	0	0	0	0	0.04887	0	0	0.01224	0	0.042939	0	0	0	0	0	0
GAS7	178	6.86744	13.4288	16.4512	4.3313	23.4561	5.85965	7.42339	3.16873	4.58478	4.12055	8.03868	10.2981	19.7107	5.14658	9.55135	13.2772	15.904	11.3509	12.6591	16.2011	8.40751	9.70079	8.08554	12.7085	34.717	12.9711	18.9311	5.20211	11.0012	30.9063	9.84287	25.3683	6.76701	54.9627	56.3143	46.3713	9.49437
TRAPPC6A	179	17.2619	9.12967	8.52656	9.31052	7.0027	9.24497	8.30028	15.3681	27.8431	20.7013	19.7727	7.47488	5.10568	23.9453	12.2934	11.2309	8.80651	7.40956	4.51224	4.22724	4.15324	4.97518	7.3043	4.02272	3.73296	8.79519	5.2431	7.37649	10.6597	3.74693	11.6867	3.19643	7.29263	3.61991	6.4241	5.37518	4.27519
MATK	180	0.585813	0.338121	2.53115	0.64928	1.43066	6.23709	0.23284	0.267978	1.10438	0.606646	1.69701	0.631794	2.72879	0.5611	0.489507	0.387205	0.347924	0.551982	2.14674	0.217486	4.58619	0.728526	0.19012	0.960498	0.875466	0.619294	0.383732	0.180007	0.638961	0.535999	4.34573	3.09524	2.36385	3.66787	3.79556	2.117	6.15479
CEACAM7	181	0	0	0	0	0	0	0	0	0	0	0	0	0	0	0	0	0	0	0	0.017375	0	0	0	0	0	0	0	0	0	0	0	0	0	0	0	0	0
CD79B	182	0.020274	0.102486	0.024728	0.075427	0.084881	0.023772	0	0.068807	0.025433	0.245917	0.235653	0.044445	0.076144	0.255935	0.078477	0.062451	0.046026	0.046023	0.026782	0	0.072352	0	0.063639	0.096448	0.106332	0.192601	0.045307	0.047157	0.128828	0.022328	0.12554	0	0.044315	0.105198	0.085903	0.140812	0.024436
SCN4A	183	0.05525	0.037235	0.028143	0.016994	0.03851	0.010748	0	0.007337	0.011578	0.031332	0.03584	0.030555	0.034781	0.048655	0.017701	0.029966	0.02074	0.052165	0.006096	0.005535	0.010979	0.049848	0.009657	0.038679	0.025225	0.019381	0.051562	0.010588	0.145361	0.035163	0.017145	0.16211	0.005078	0.004009	0.024457	0.505884	0.011356
ST7L	184	1.60992	1.87494	1.54063	1.58546	1.6303	1.97283	1.54382	3.2875	1.7523	1.68006	1.65005	1.78303	1.53696	3.04512	1.73778	1.77381	1.97983	1.69897	1.33973	2.57309	1.78896	1.68005	1.97652	1.79161	1.75977	2.14977	2.12049	1.57546	1.52379	1.99717	2.24816	1.28969	1.38413	1.28613	1.45635	1.07235	1.20047
TKTL1	185	11.3341	11.8854	0.524549	1.05415	4.05692	2.30207	2.82293	0.044161	38.8648	33.2549	24.8717	4.28444	2.34485	4.77493	14.8554	10.6127	31.9091	43.9282	2.07798	0.150021	2.22042	3.83217	22.913	1.87429	5.19367	22.3705	13.9855	3.44283	55.0487	7.60408	30.973	0.228815	1.30015	0.017071	0.394439	0.243327	0.50858
PAX6	186	14.6338	16.6892	5.18418	1.30664	9.55094	3.23963	11.2024	4.49908	18.482	15.0972	11.2474	8.47789	11.1173	11.0734	14.224	14.1078	27.9907	27.6217	11.5032	3.45279	5.516	10.3759	32.5708	3.18589	13.4924	12.6841	21.7805	11.2436	21.6691	17.112	5.0954	1.20874	6.92514	0.306116	0.441091	0.322628	1.10168
RPUSD1	187	7.11703	7.01044	7.64019	7.89907	7.45059	8.55018	7.13314	6.14476	7.33042	9.24644	7.09816	6.96979	7.15013	8.38713	6.51373	7.95418	4.59565	4.99104	4.80263	4.14699	6.01816	3.46585	3.96618	3.90022	2.83818	4.40728	3.32457	6.05381	5.36291	2.63529	9.57023	12.1018	10.0931	11.5137	10.8133	8.19427	5.9283
RHBDF1	188	0.231322	0.505861	0.340093	0.447346	0.882728	0.658568	0.254651	0.254466	0.202357	0.188217	1.18435	0.402979	0.266206	0.902992	0.347425	0.483274	0.263985	0.296343	0.167098	0.12689	0.734985	0.40684	0.13215	0.762551	0.375183	0.511876	0.321789	0.230315	0.372383	0.353408	0.609589	0.284759	0.416605	0.52448	0.379702	0.222141	0.148305
LUC7L	189	9.46634	11.4988	8.3433	8.95904	8.07721	12.162	9.22343	9.18622	9.49626	9.23164	6.89433	10.7517	7.2616	8.54454	8.8825	9.38589	15.0697	13.6729	7.75068	9.14274	9.97	13.0745	13.4334	12.2042	10.7388	8.57015	13.3975	9.32797	12.5816	12.0761	6.92643	9.7166	8.45042	9.73349	8.55379	6.47467	4.34575
CACNA2D2	190	0.612277	1.40526	4.9106	1.86913	3.1689	16.5098	1.91532	5.37601	0.825503	0.378036	1.00302	4.48324	6.2055	1.89455	0.765232	1.17413	1.43419	2.02764	4.92502	13.5651	14.5091	2.92698	0.810315	7.17929	2.53647	2.25713	1.71736	1.7146	1.39748	2.37579	1.01557	10.1779	2.9993	3.99634	3.08824	5.2251	3.27624
BAIAP3	191	3.79775	3.23003	8.2913	4.12699	4.67509	13.0153	3.13637	5.20314	4.19196	3.88334	5.6948	5.66221	7.33994	8.60932	4.20327	3.31562	1.82699	2.61007	5.83258	6.66238	11.8474	4.1203	1.83967	4.87468	1.30581	8.99591	2.11706	2.39652	3.80032	1.71541	8.68621	7.61206	2.96927	2.06251	2.16381	2.36012	4.6416
C16orf42	192	50.6718	39.1041	43.804	45.202	42.8034	61.884	42.7568	48.9004	45.8137	57.6922	61.4246	47.6627	41.5919	50.1621	50.3881	44.0643	21.8178	21.8759	24.786	26.3774	33.1779	18.3351	20.1884	17.6342	14.8118	24.8804	17.8972	23.9601	21.8143	18.5784	38.9672	40.7315	38.7385	34.1701	33.4466	21.5496	35.9705
PIGQ	193	4.95789	4.8853	4.50867	4.87272	4.3998	7.0424	4.82934	4.58687	4.77434	4.58986	5.1115	4.84259	4.83424	5.49797	3.86737	4.74142	5.83226	5.8959	5.15652	5.71959	6.61393	6.28733	6.00146	5.62731	3.72471	5.0747	5.0974	6.33635	6.27709	4.07263	4.62216	5.27741	4.68315	4.74859	4.93688	3.2993	3.13995
CRAMP1L	194	4.26776	6.33609	4.06862	4.48755	5.59506	5.35623	5.1318	3.82896	3.44693	2.83385	2.65157	6.06407	4.50736	3.68644	4.17153	5.50195	7.51452	7.49097	4.9844	3.99373	4.47455	6.10263	7.97038	5.59173	7.65182	5.35352	7.96621	4.84066	7.08245	7.30945	3.88431	5.10591	4.73316	6.89235	7.21355	6.73109	2.02522
TEAD3	195	3.51321	3.31188	1.15307	1.72686	2.74964	1.87438	2.23002	2.19455	2.36651	1.63418	3.6362	2.12363	1.16362	4.02465	1.8211	3.35234	3.37398	2.92921	1.61678	0.980105	1.54715	2.56477	4.54378	1.57897	1.90692	2.90179	3.98227	3.099	3.78388	2.31462	1.4038	0.229831	1.31547	0.435417	0.43484	0.336416	0.203041
SELE	196	0.680702	0.948477	0.217345	0.079382	0.587059	0.020015	0.066948	0.024399	0.778702	1.15554	0.816083	0.094188	0.386956	1.47034	0.881682	1.21884	0.019245	0.048437	0.011275	0.010099	0.040474	0	0.026791	0.040602	0.081331	0.358827	0.019073	0.02971	0.081106	0.018672	0.04228	0.009972	0.018656	0.007414	0.14453	0.042227	0.021146
DNAJC11	197	11.2461	12.1285	10.2457	10.6326	10.3302	13.529	11.3161	9.22472	9.25111	8.07189	7.86735	12.0707	10.3545	9.98954	9.91757	10.8354	10.6697	9.8348	8.12986	6.903	7.93039	6.84409	10.4911	7.5851	7.30532	8.26568	10.758	9.32261	9.84721	8.07523	7.99063	13.3938	10.5969	11.0057	10.0797	10.919	4.74314
FMO3	198	0.010259	0.010543	0	0	0	0.012194	0.010214	0.011765	0	0.013931	0.026801	0.011477	0.029594	0	0.013479	0	0	0.023448	0	0	0.012371	0.013216	0	0	0.028424	0	0	0	0.011014	0	0.038464	0.048273	0.011443	0	0.011053	0.010319	0.038475
MYLIP	199	0.96052	0.985797	6.76617	2.20502	2.31314	2.56752	1.11691	0.783959	1.15843	1.05792	4.85372	2.27528	2.09248	1.66145	1.22893	1.04811	0.847484	0.822462	1.46917	0.981251	4.27268	2.78547	0.39741	2.92142	1.197	1.41693	1.40219	0.934581	1.0171	1.01769	0.940753	13.8381	1.20855	6.52064	2.2436	1.52782	2.01236
NOX1	200	0.223747	0.200544	0.107524	0.219899	0.126244	0.033329	0.13676	0.050408	0.28864	0.169785	0.114617	0.211527	0.23902	0.25738	0.327345	0.210813	0.046217	0.076516	0.055564	0	0.039525	0.080301	0.108517	0.125795	0.234384	0.096441	0.148504	0.079384	0.127534	0.070012	0.279242	0.150793	0.134408	0.130141	0.078388	0.113195	0.299308
E2F2	201	9.48247	10.1951	5.50385	16.3083	6.30237	1.58009	13.4765	3.30044	6.5624	5.19929	3.44223	11.5923	4.74085	5.98954	6.42384	9.96244	7.85164	7.48638	8.93076	1.74306	0.918775	8.41801	10.7437	10.3156	4.79846	5.16253	9.54964	14.9908	7.5793	6.10032	1.73377	1.70528	6.93909	0.080338	0.36468	0.124561	0.253477
PSMB1	202	70.2971	44.9595	54.6947	55.5991	42.5412	27.4138	50.3237	46.448	66.7075	87.351	69.3728	41.1981	46.6576	63.3945	53.5133	51.374	34.4712	33.6207	39.3988	33.8417	28.0302	34.5725	34.3999	29.929	26.5928	39.7642	29.2689	42.408	34.9047	30.4668	52.0756	31.6618	56.0806	27.1307	25.7123	23.8833	46.9002
SYN1	203	5.57327	8.94697	18.7064	6.75104	16.7561	33.6628	7.12373	12.2969	4.31596	3.4975	4.32438	10.2963	22.21	5.02563	6.4821	8.53139	8.39618	10.9017	16.1837	30.3803	35.9226	8.6729	4.45186	15.1319	14.9291	12.6104	11.415	5.44139	12.7909	12.8295	17.7004	27.49	12.7539	26.4894	23.4955	21.7858	11.4382
JARID2	204	7.44981	13.3569	8.32362	8.68368	10.6103	14.2565	8.65186	6.74744	7.12729	5.61431	4.97778	10.1279	8.90058	8.26882	8.60626	11.7126	9.89063	10.529	8.1726	8.57001	13.2843	6.18109	7.19515	7.57266	13.5457	10.9697	14.9757	5.62093	10.8097	11.4321	3.71556	8.3292	5.6295	3.92595	5.40982	4.53364	3.91741
CDKL5	205	0.855961	2.30222	1.64564	0.923444	2.0125	0.924594	1.05281	1.16862	0.886948	0.527576	0.619481	1.4334	1.89872	0.956861	1.63813	1.92635	3.87952	3.02137	2.55364	3.58921	2.15058	2.07475	2.46362	2.70693	3.91437	3.2362	2.45354	1.57201	3.021	4.67295	1.78028	1.82614	1.69492	8.94387	7.1429	10.3213	1.38168
CAMK1G	206	0.895626	0.816668	2.61888	1.42981	1.63773	2.45646	1.80462	2.42903	0.621568	0.853306	0.715119	1.4889	3.70239	1.51365	0.815395	1.0011	1.15307	2.4245	4.32134	2.94342	2.92092	1.5773	1.14705	2.16271	1.77729	2.19266	1.32839	1.93818	1.75652	0.78062	2.25054	2.58328	2.03057	0.901088	0.639326	2.13239	1.47231
CDK11A	207	1.26241	2.49829	1.78875	1.48176	1.94068	2.19981	1.70714	1.37019	1.20738	1.05025	1.06563	1.97855	1.40294	1.23751	1.36643	1.727	2.59792	2.33538	1.32696	1.22873	1.9409	1.70147	1.97571	1.62796	2.2705	1.4777	2.49531	1.18637	2.07314	2.23455	1.3249	2.26589	1.51837	1.97414	2.39784	1.75461	0.631573
NADK	208	9.06216	7.74284	5.7773	6.23583	7.66189	5.76104	6.36597	5.2608	8.21763	8.67471	8.5903	7.49919	5.86808	7.6477	7.3753	7.75485	7.57203	7.49997	6.49803	4.80702	5.74404	5.7653	8.13538	5.69662	4.88689	7.21041	7.12299	7.59429	8.35871	5.6072	5.59501	5.43257	6.59286	5.82597	6.66739	5.80682	4.01359
TFAP2B	209	0.064386	0.156511	0.050099	0.136441	0.134287	12.8238	0.034501	0.053105	0.323587	0.158609	3.65639	0.07123	0.005566	0.067971	0.159095	0.144111	0.039873	0.01998	0.007752	0.007038	9.81566	0.007457	0.00614	0.007026	0	0.006203	0	0.020426	0.068274	0.090122	0	0.034186	0.006457	0.010195	0	0.034775	0.014538
TFAP2D	210	0	0	0.841019	0.07207	1.46452	0.43033	0.840746	0.153108	0.072575	0.052256	0.024792	0.441423	4.50089	0.081699	0.12486	0	0	0.065665	6.87695	0.162019	0	1.33138	0	0.667971	0.237901	0	0	0.180539	0.060716	0.336732	0.095314	0.113164	9.11557	0.033202	0.061212	0	0
DLEC1	211	1.42562	0.931223	1.05347	0.937141	0.973426	0.998905	0.859242	0.46411	0.934927	1.30907	1.13346	0.798708	0.817893	1.08012	0.890447	1.08492	0.93995	0.740598	0.741324	0.458009	0.774177	0.810312	0.756856	0.684933	0.649025	0.922799	0.82857	0.636591	0.752727	0.699325	1.55902	0.928448	1.0517	0.852911	0.887142	0.741722	0.957121
CYTH3	212	5.62401	8.05277	6.82027	7.54087	9.33374	6.62819	6.78082	4.94265	6.07502	6.61649	16.6207	8.32001	6.47792	7.26465	7.65656	7.78744	8.74787	8.37	6.69205	5.05494	7.06613	6.30751	7.25858	6.47008	7.99179	7.3262	7.54558	5.98946	8.29051	9.22528	5.99932	11.4121	6.20592	10.162	11.0346	11.3382	5.56499
ADAM22	213	2.18027	2.82976	3.77385	3.00889	3.29391	4.70532	2.65888	3.67566	2.10614	1.83162	2.57375	3.81547	5.38682	2.66517	2.77582	2.36472	2.09883	2.24103	4.71389	3.77898	5.58982	3.28871	2.13819	4.38909	2.86285	2.47521	2.27503	2.83873	2.01373	2.567	2.56329	5.00748	4.17492	3.73533	1.68357	2.6316	4.59142
SYPL1	214	13.9573	11.8372	3.79718	5.41551	9.42943	3.70995	7.00088	1.50018	20.1252	17.8697	16.1605	5.64515	6.50506	16.1406	12.564	11.9295	11.3838	14.4013	7.02654	1.71433	4.97896	8.51831	16.0332	7.35008	9.26951	13.3572	11.2535	8.70687	14.6327	9.49849	12.2797	2.20425	7.7206	6.40291	4.1874	3.75563	5.17418
CYB561	215	2.47725	2.14246	5.49425	3.53627	2.68668	7.38995	2.49192	3.48404	3.32961	2.6846	4.91391	3.90556	4.5146	5.69856	2.35672	2.07133	1.61825	2.29558	2.73876	7.83859	6.83261	2.50157	1.24436	2.96057	1.63907	3.5337	1.90038	2.31218	2.09231	1.91441	6.33804	9.89119	5.11799	4.02988	4.21381	3.96155	12.0027
SPAG9	216	15.6681	23.7931	19.1749	26.9857	19.4814	18.2944	27.2042	27.1925	13.4872	13.3094	12.282	28.9791	21.5482	18.2317	19.3014	19.4759	20.8627	20.1235	26.2175	28.054	18.7986	30.694	24.8987	34.7552	21.941	15.3749	20.0054	25.8611	15.7163	22.16	19.2973	17.0807	28.6568	17.5002	14.1252	18.5969	25.9593
CELSR3	217	3.65126	9.11834	8.13266	6.5989	9.13702	15.6803	6.83898	9.38855	3.09269	2.483	1.67051	11.573	9.02377	3.3036	4.85662	7.97572	9.35259	9.46483	10.8149	14.3878	15.7276	10.3257	7.39584	9.40282	13.6679	9.19746	11.8273	6.55604	11.3983	12.6356	6.96642	18.8665	9.13284	19.157	20.8766	22.5704	5.02142
AASS	218	1.53223	3.38732	1.04206	1.74945	1.55417	0.743867	2.09757	0.627831	1.5198	0.897847	1.06749	2.66085	1.2741	1.46185	1.62536	2.04309	5.52168	4.47492	2.81808	0.854722	1.07559	6.12713	7.20338	5.9128	3.59996	2.43741	5.80115	3.98598	3.96276	4.13329	1.15986	0.338414	1.94245	1.40646	1.18084	0.891783	0.173381
PLEKHG6	219	0.025209	0.008442	0	0.039255	0.008835	0.029692	0.024872	0.047618	0.010589	0	0.087016	0.036884	0.031811	0.02658	0	0.008902	0	0.009581	0.011151	0.030374	0.010041	0	0	0.020078	0	0.017847	0	0	0.026698	0.009296	0	0.019058	0	0.007333	0.008972	0	0.11446
SS18L2	220	14.7772	10.8878	12.2669	11.0972	10.1716	12.2292	10.1281	11.2194	16.0267	15.543	14.4363	10.6447	12.4714	12.342	11.5879	11.2651	9.384	8.53972	8.81038	8.7381	8.90694	9.99176	9.37666	9.17428	9.55086	9.17611	10.0128	8.79779	8.45509	9.39264	18.3733	10.5668	13.2565	11.2541	10.81	9.57506	23.94
MPND	221	19.2209	18.6393	24.8151	22.1252	20.5949	32.6941	20.5427	36.6602	26.4542	24.9263	20.7802	21.3771	19.17	24.6452	20.8675	19.1637	13.6455	13.7506	14.1638	18.1586	16.3656	12.3434	12.2802	11.5819	7.94438	13.0855	10.0187	14.0852	14.4	9.97809	13.012	18.1533	16.6503	15.4316	14.2074	12.9497	12.0815
MGST1	222	0.221747	0.16115	0.410377	1.92176	0.216956	0.645218	0.58265	1.08633	0.066445	0.105087	0.610366	0.675045	0.512596	2.00416	0.145022	0.148365	0.068519	0.048674	0.614421	1.02606	0.937707	0.401038	0.088233	1.53968	0.290427	0.255045	0.122461	0.536238	0.071487	0.202106	0.638925	0.112521	1.48714	0.214935	0.148916	0.106861	3.77959
CRY1	223	9.356	8.44166	10.9524	9.94988	8.25713	6.73806	9.98625	7.30227	8.23161	9.33618	7.16638	9.40241	9.4609	9.17025	9.96909	7.91497	7.24945	7.07644	8.50952	6.92188	7.42234	7.87594	7.04612	8.62077	7.12174	7.93954	6.77629	8.77878	6.95189	7.18077	8.95709	12.7771	9.08399	8.30787	8.05342	11.4954	11.3013
PGLYRP1	224	0.151283	0	0.046288	0	0.079442	0	0	0.042932	0.142821	0.051533	0.344636	0	0	0	0	0	0	0	0.050133	0	0	0.05279	0	0	0	0	0.042404	0	0.040191	0	0	0	0.082387	0.009356	0.080126	0	0
NFIX	225	37.295	71.568	7.49942	2.79305	35.1798	15.1381	11.7697	0.395707	40.5176	18.1146	6.01753	4.21919	11.8764	56.7353	24.1399	68.9795	87.7939	81.4566	19.2764	1.87669	12.0993	6.17746	64.8781	5.72192	66.1675	114.812	112.982	13.0039	160.813	85.1083	114.04	3.60219	37.6202	95.3333	279.709	167.962	4.55947
ST3GAL1	226	4.43844	6.30499	2.52976	1.51664	7.62792	3.85256	2.37188	7.12754	3.9719	2.59222	2.96448	2.14082	3.5999	5.19463	3.67434	6.25247	5.86315	4.51063	2.24571	10.1854	3.89047	1.57044	2.89923	2.15052	14.1094	8.37098	10.8085	1.44087	6.98343	12.5946	5.26583	4.08334	2.14921	20.1906	43.6565	16.1709	1.81918
MMP25	227	1.16659	1.46431	1.33876	1.15045	2.06259	1.36925	1.45518	0.803902	0.825173	0.878883	1.13072	1.13916	0.964308	2.10813	1.10293	1.35041	0.682982	0.797087	1.08675	0.74079	1.28164	0.844221	0.850118	1.14482	0.843664	1.52807	1.33457	1.63234	1.17528	1.01358	1.47175	1.52348	1.17015	1.19895	2.059	1.23064	0.724857
IL32	228	0.438021	0.410754	0.253202	0.113677	0.590589	0.173219	0.072548	0.221831	0.46018	0.665461	0.85879	0.095317	0.185999	0.68617	0.333897	0.364672	0.208951	0.444941	0.324018	0.175797	0.553994	0.234997	0.165742	0.366368	0.602253	0.570049	0.445841	0.373099	0.686754	0.552366	0.36385	0.200267	0.350067	0.52132	1.53475	0.52048	0.15182
PKD1	229	0.938038	4.21332	0.539226	1.01636	1.1724	3.89591	1.09762	0.413233	0.708652	0.548478	0.502676	3.05585	0.666053	0.927343	0.778243	2.40591	7.34198	7.84043	1.82297	2.61447	4.65629	6.59499	7.71099	4.95059	4.81278	2.11127	6.13485	2.27424	8.15713	5.13911	1.45796	5.17636	1.94361	6.30248	5.77661	2.43605	0.758957
MAPK8IP2	230	21.6501	24.4888	40.9103	28.3544	37.4045	68.1428	28.121	52.6566	24.5205	20.3455	20.2165	34.663	39.3616	22.4102	27.8051	28.166	20.0827	22.2436	26.5437	43.6536	43.0114	17.186	14.478	20.9484	19.9506	24.9747	18.266	20.0837	25.9164	20.5473	35.5361	43.5859	24.5826	51.0459	53.1951	44.7656	29.1804
MED24	231	23.4477	26.7228	27.7589	27.001	26.4336	28.4742	26.2096	23.3902	21.3876	18.8107	17.0646	28.3947	28.1418	22.7103	21.4916	25.8603	27.28	30.2602	29.4563	37.5172	34.2319	25.8743	26.456	25.7405	24.2924	30.9947	27.6577	27.7061	32.9272	26.3339	23.43	31.4103	24.758	26.6205	27.5443	30.158	16.3042
RHOBTB2	232	11.2655	15.1007	18.1266	12.7464	14.9834	23.7136	12.6536	16.4832	16.5732	11.1655	11.2593	17.259	16.198	17.956	11.4677	14.0629	14.7439	15.5215	15.7165	19.0784	18.6827	11.867	14.7524	12.1538	12.9561	20.1949	12.956	11.2286	18.8637	12.3866	17.745	28.7739	14.9591	18.2823	17.3681	15.7947	12.8368
HEATR5B	233	4.75179	7.25328	10.8072	6.6692	8.72729	7.95444	7.87443	6.86193	4.01391	3.16894	3.18754	8.15254	9.51807	4.27845	5.46001	6.63112	9.20096	7.9024	11.4055	14.4107	11.6862	8.66564	8.9776	10.1655	13.3386	9.35664	10.5353	9.89036	8.04762	12.4447	6.54095	10.0122	7.83651	11.7736	11.3333	13.8147	7.21533
SEC62	234	23.232	20.2627	22.8302	21.4004	24.5581	20.2791	21.3556	29.0281	26.2209	25.984	32.9483	20.2866	27.7503	24.6138	27.9972	19.1467	14.588	15.7387	19.8279	20.8641	18.9022	16.2875	14.2654	19.6671	18.7468	17.8178	16.469	15.7882	13.7587	17.9017	34.3082	18.4932	21.3828	21.3909	20.3825	20.6441	61.6292
RPS20	235	192.86	101.238	119.055	138.604	107.596	121.16	140.042	205.078	236.933	250.921	319.855	128.763	91.9035	218.795	260.486	151.124	103.932	94.6006	95.4249	46.4014	60.1419	77.2795	79.1929	59.995	91.6402	102.477	90.8968	96.6432	92.7529	96.7653	155.023	73.556	145.841	71.2108	112.93	71.0183	97.9678
CSDE1	236	113.458	124.209	153.533	134.262	130.389	121.662	119.862	145.66	122.915	119.566	119.419	131.136	132.86	130.705	129.671	115.381	90.0948	89.6057	105.726	140.924	117.253	88.192	75.1333	101.578	128.391	109.641	108.877	86.3483	89.3109	123.963	102.032	103.613	95.6955	120.681	114.958	146.173	128.889
UBE3C	237	6.80429	6.45481	6.70746	6.0426	6.43181	6.95096	5.8437	6.15069	5.9595	6.09399	6.80357	7.23544	6.51102	6.65311	6.22924	6.02369	4.04165	4.08375	3.52965	4.01956	5.28846	3.48347	4.05075	4.05103	4.42051	4.98884	3.81826	2.77069	4.28009	4.07894	5.80277	8.65452	6.3548	7.12252	6.30401	7.36695	5.98042
REV3L	238	2.44832	5.92086	5.20077	3.49488	4.48642	8.27284	3.92958	2.78801	2.36117	1.3279	1.54487	6.47871	7.24205	3.55324	2.16372	4.38833	4.47048	5.3163	6.9567	8.92026	10.5446	4.811	4.75837	8.24588	6.62959	5.74115	5.65184	2.72655	5.78345	5.36712	4.6519	9.85434	6.02269	5.88631	5.21934	7.36902	10.8213
ODZ1	239	0.069599	0.243217	0.912155	0.737227	0.516856	1.76976	0.346427	3.98296	0.147145	0.083435	0.641174	1.29023	1.35538	0.426922	0.256628	0.131994	0.240865	0.347796	0.715343	11.6831	2.08409	1.98074	0.151852	2.46507	0.324205	0.686658	0.118488	0.362414	0.309959	0.224129	0.529096	4.67927	1.30845	1.11484	0.448025	1.20628	16.4218
PAX7	240	0.028573	0	0.020911	0.037134	0.011963	3.41175	0.005613	0.01293	0.080311	0	0.378007	0.025226	0.027103	0.066279	0.044441	0.03037	0.012973	0.03883	0.015099	0.041034	4.37554	0	0.011959	0.006843	0.031238	0.018123	0.019156	0	0.084485	0.037761	0.007077	0.013353	0	0.014893	0	0.01134	0.021238
MASP2	241	0.355645	0.525715	0.504644	0.571314	0.61774	0.689593	0.56267	0.366568	0.530816	0.232763	0.324199	0.512605	0.558633	0.408087	0.357305	0.42459	0.531544	0.441518	0.337385	0.697048	0.474867	0.394603	0.45269	0.558113	0.58499	0.272046	0.639871	0.472108	0.507466	0.469283	0.341832	0.882321	0.42765	0.914542	0.802294	0.551943	0.36237
IYD	242	0	0	0	0	0	0	0	0	0	0	0	0	0.003305	0	0	0	0	0	0	0	0	0	0	0	0	0.003683	0	0	0	0	0.004315	0	0	0.003027	0.003703	0	0.017265
FAM76A	243	3.027	2.97406	2.72103	2.25739	2.46794	1.65111	2.64186	1.83237	3.65056	3.27696	3.17241	2.05023	2.59333	3.47708	2.89345	2.26148	2.19711	2.2515	1.85063	1.36023	1.36794	1.66619	2.37352	1.99717	2.17884	2.36728	2.06019	1.82288	2.25949	2.37326	2.66815	2.65407	2.81556	2.57002	2.32871	2.83718	2.87778
TRAF3IP3	244	0.343343	0.128703	0.171332	0.200155	0.187417	0.17104	0.19426	0.12592	0.328778	0.196809	0.311637	0.200516	0.177597	0.397136	0.226378	0.193794	0.171289	0.177628	0.154015	0.185447	0.157379	0.116373	0.155986	0.14818	0.165253	0.253471	0.237645	0.159398	0.181181	0.216718	0.175519	0.06763	0.182643	0.080315	0.159788	0.125531	0.177439
POMT2	245	2.82708	2.49455	1.83191	2.48685	1.79697	2.1318	2.18789	2.05178	2.86525	2.34127	1.99799	2.13557	1.85895	3.24667	1.65101	2.40286	3.28876	3.50207	2.26003	2.41993	2.15344	2.461	3.64025	2.80463	1.85497	3.11863	3.15545	3.25799	3.57809	2.27234	3.13757	1.37583	3.0015	1.59932	1.18733	1.23261	1.558
VTA1	246	31.3976	28.9591	31.5888	35.8295	36.6539	21.6941	32.9444	26.4208	30.8954	36.0644	31.6507	29.625	37.1715	27.5278	38.9413	29.5038	23.707	24.7264	32.4731	25.4112	23.3305	25.0555	25.335	30.0855	36.6358	27.7682	25.7187	29.239	21.474	34.0973	38.3459	29.9721	33.1124	44.6412	34.4758	35.7969	59.345
MLXIPL	247	0	0	0.009002	0	0.007831	0.043624	0.007348	0	0	0	0	0	0	0.01567	0	0	0	0.042459	0.029383	0.044747	0.061577	0	0.007828	0.017796	0	0.015818	0.016606	0.00876	0.031372	0.008239	0.009265	0.008623	0	0.006499	0.023641	0.022169	0.027804
BAZ1B	248	24.0595	38.7514	23.6689	28.474	28.105	21.2849	30.6758	21.1038	21.5925	15.8796	12.4564	33.1113	22.3291	23.8924	22.4316	32.4009	39.5886	33.4991	32.0911	23.8031	20.5968	28.2864	39.5176	30.3509	35.277	32.1573	46.4041	34.4731	33.9607	37.8535	17.7387	19.6972	23.8138	22.2351	21.1779	24.0946	8.60252
RANBP9	249	15.6465	21.7552	16.1864	20.1569	21.1631	18.4221	20.0929	21.1638	15.8645	14.6669	12.9929	20.7591	18.524	17.2274	17.6809	18.9316	17.6789	17.5827	15.7154	18.4517	17.332	16.0751	18.681	16.8554	19.7597	18.6113	18.605	15.6781	17.9294	19.8198	18.6451	14.8785	18.6795	19.3242	17.1393	16.6333	24.8903
ETV7	250	0	0	0	0	0.015687	0	0	0	0.094779	0	0.028233	0	0	0.032037	0	0	0	0.017244	0	0.00788	0.018073	0	0.000859	0.035892	0	0	0	0	0.01609	0	0	0	0	0.013198	0	0.015074	0
C1orf124	251	4.30222	3.05918	2.69408	3.0323	2.88011	1.62089	3.10626	2.09267	3.31703	3.51513	3.13542	2.57296	2.6893	3.24232	3.55631	3.29921	2.29187	2.44208	2.43384	1.08857	1.08688	2.22466	3.03382	1.9282	2.15473	2.70959	2.92523	2.4189	2.56987	2.64063	2.57611	1.6956	2.81154	1.93654	2.40979	2.11415	2.24478
METTL13	252	14.7555	10.9813	10.1993	11.0234	10.7436	9.93083	11.2105	8.55986	14.6304	13.5243	11.8265	10.0996	9.8582	12.9655	11.0744	12.4185	8.72636	8.37729	8.12267	6.04351	6.8711	6.80378	9.11599	7.1831	6.92483	9.7059	7.6436	8.14875	9.59043	7.16078	10.2937	8.70719	11.4587	9.036	9.46027	8.90934	7.74027
DYRK4	253	1.57825	1.11573	1.03351	1.64119	1.19743	0.761232	1.20079	0.849692	1.40399	1.68904	2.47771	1.13449	1.35559	2.293	1.37615	1.25637	1.3944	1.42149	1.43783	0.527763	0.712996	1.19426	1.45434	1.19834	1.00113	1.64705	1.2122	1.30708	1.3924	0.918054	2.40975	0.703928	1.87788	0.929444	1.22452	0.870051	2.26072
ZNF207	254	16.1165	14.527	12.078	15.7252	12.7356	8.37475	14.8035	9.96421	14.2787	15.2528	11.2836	13.1974	13.3617	13.3418	14.2392	14.3777	13.5369	14.2827	14.1309	9.97714	10.2505	15.2997	15.003	16.0039	13.2802	14.6947	13.4506	16.2592	14.1028	12.7954	13.0144	10.5108	15.179	10.2812	10.373	10.5359	8.31063
UQCRC1	255	90.8191	57.4736	67.8483	76.7894	56.3331	49.5429	68.1288	60.0638	85.1044	97.0105	66.5126	60.1343	61.0316	72.8727	71.3785	65.4126	54.2588	52.8429	55.8917	47.4468	44.7956	51.2106	51.6917	45.2788	34.7609	56.308	42.905	72.3632	59.3078	38.5626	52.7316	55.313	73.0122	37.1444	41.95	38.2038	33.1637
STARD3NL	256	16.7952	11.7386	18.2979	16.7148	13.9057	13.463	15.2214	20.3026	13.941	21.936	20.5615	13.7905	18.6264	15.9078	18.2027	13.4218	13.6673	12.982	19.4262	20.1956	16.9159	15.4634	13.3579	17.7315	13.2507	15.969	11.2905	16.8037	12.0794	13.2648	28.5791	12.9586	17.484	12.0586	12.5166	11.4927	49.3206
CD9	257	1.85314	1.9318	2.12417	1.63371	3.14066	1.27684	1.81551	1.99052	2.54363	2.30337	10.345	1.52848	0.989676	5.9371	2.01485	1.75159	1.54747	1.9791	1.82211	1.22192	3.18059	2.13527	1.62007	1.659	1.89176	5.64465	1.66811	2.95732	4.2788	1.75027	8.17201	0.789961	2.9377	1.8297	1.68501	1.59503	1.46934
HHATL	258	0	0	0	0	0	0	0	0	0.027197	0	0	0	0	0	0	0	0	0.031093	0	0.014715	0.029388	0.015805	0	0.014891	0	0	0.013896	0	0.026164	0	0.015194	0.022973	0.027369	0.021462	0.012861	0.021011	0
NCAPD2	259	34.019	36.4861	23.2431	45.8713	20.8692	11.0303	44.3963	19.6076	30.1733	23.5354	15.2101	34.8986	18.8886	31.7009	23.0305	33.5662	47.2199	45.0519	41.9141	13.2346	11.5572	41.5393	54.4468	43.5646	26.7352	36.2709	42.6888	63.2003	42.9026	31.1647	13.9704	8.02319	28.4545	4.0791	5.71533	4.27723	2.29812
IFFO1	260	1.84582	3.05984	2.13172	2.1668	2.91877	3.53584	2.34024	1.93135	1.66934	1.70666	1.67746	3.11767	2.15713	2.08218	2.20824	2.70353	3.58142	3.79158	2.12691	1.42781	2.52716	2.50645	3.66476	2.29793	2.51227	2.52453	3.61707	2.9826	3.50264	2.77226	2.00288	3.65983	2.19642	3.76441	3.68052	3.08936	0.984764
GIPR	261	0	0.054015	0	0	0	0.018092	0.015155	0	0.022381	0	0.104469	0.039111	0	0	0.070934	0.018319	0.060754	0.02025	0	0.04251	0.042446	0.045346	0.035317	0	0	0.01886	0	0.020608	0.03779	0	0	0.083378	0	0.001466	0	0.119608	0
PHF7	262	0.964037	1.70629	1.15378	1.11832	1.35297	1.9223	1.34529	0.970277	1.26266	0.827493	1.00025	1.56065	1.15516	0.989793	1.01345	0.934103	1.61688	1.55604	1.25279	1.26748	1.34748	1.7319	1.58391	1.8743	1.41208	0.961288	1.26211	1.08641	1.41396	1.48019	0.835464	0.896758	1.05039	1.11172	1.33654	1.5761	0.559611
SEMA3G	263	0.272749	0.819869	0.995905	0.387619	1.61585	1.34401	0.471497	0.584829	0.412934	0.311971	0.847032	0.727908	0.63377	1.4203	0.547079	0.633001	0.200375	0.218989	0.404442	0.429527	1.04788	0.205334	0.213762	0.450884	0.626192	0.769753	0.697519	0.201694	0.477153	0.956118	1.20769	1.27786	0.954648	1.46352	2.45213	1.78938	0.364228
NISCH	264	8.27984	12.3467	12.8914	11.2791	13.9546	21.2778	10.4268	12.0834	7.03846	5.08078	5.62391	13.3091	13.8335	10.589	7.26365	12.0236	17.1165	17.9536	15.0716	23.7142	26.6333	14.6405	15.99	15.7768	15.3834	18.01	17.4532	12.6581	20.5892	15.7338	13.2268	18.0976	12.1027	18.4879	19.8888	20.8447	8.17477
STAB1	265	1.44619	1.61174	1.58739	1.51026	2.19338	1.77558	1.45055	1.54533	2.0959	1.87019	1.63731	1.25295	1.33679	1.77109	1.35326	1.41539	1.34649	1.57918	1.07771	1.13328	1.88347	1.15707	1.65234	1.16435	1.28186	1.83849	1.84622	1.39621	2.00239	1.62338	0.99567	1.1122	1.3935	1.55831	2.00675	1.44719	0.815949
FUZ	266	19.3247	13.5906	11.5557	16.9908	10.6621	8.67012	15.8307	9.92502	22.0851	21.0417	14.2541	12.6394	11.1717	15.1577	13.8457	14.4233	13.3943	12.6146	14.1953	5.52607	6.08926	12.8459	13.8867	11.6333	6.99652	11.3628	10.9306	20.1686	13.9928	8.45984	10.8639	8.65919	19.6696	6.28885	9.6295	5.52782	5.73948
SLC6A13	267	0.389008	0.273801	1.08451	0.133763	5.48014	1.59483	0.016671	0	0.412621	0.401956	2.979	0.009366	0.793047	2.78698	0.776673	0.456901	0.096072	0.478251	0.033179	0.030538	4.75204	0.03221	0.115079	0.625103	1.39896	3.36582	0.795273	0.029677	0.573045	0.688609	3.44	0.069007	0.028015	3.06034	1.09133	1.0932	0.020885
IDS	268	10.6206	17.7353	26.4521	13.3901	25.4522	31.4226	13.2642	20.1989	10.9648	11.1088	13.3805	17.2703	31.814	10.3915	16.6247	15.189	16.5777	19.2019	26.4641	52.3531	48.361	17.2045	12.127	25.8199	29.5075	23.7797	19.247	12.6897	20.2103	26.0874	25.5521	32.5389	17.3875	36.0176	35.8497	42.1648	41.5442
PRSS3	269	0.112502	0.034154	0.445419	0.190253	0.131294	1.4461	0.080657	0.205884	0.027925	0.084148	0.164297	0.225072	0.469948	0.224553	0.10098	0.102545	0.048144	0.052922	0.665615	0.367303	2.56141	0.157882	0.032734	0.504629	0.060019	0.167903	0.025545	0.122925	0.081556	0.068576	0.238424	0.249884	0.401501	0.143466	0.070339	0.048352	2.07638
ZNF200	270	4.32149	3.89338	5.19218	3.82987	4.10019	3.13984	3.39937	2.68767	4.48957	3.71948	3.97552	3.26092	4.31751	4.37265	3.99697	3.64282	2.16948	2.16663	2.62789	1.45135	2.51054	1.66632	2.0206	1.93353	2.42537	2.54941	2.08062	2.18219	2.25091	2.24908	4.32056	3.66732	4.72619	3.45543	3.93759	3.49659	3.06414
CD4	271	0.540461	0.707033	0.573332	0.437296	1.755	1.32246	0.277879	0.345782	0.637105	0.670902	1.32119	0.154707	0.580664	1.8193	0.630031	0.644259	0.344535	0.681074	0.306692	0.629922	1.84679	0.140636	0.368041	0.346406	0.702899	1.6084	1.01402	0.119628	0.974042	1.12413	1.21346	0.395453	0.543754	1.15151	1.79931	1.11182	0.262471
LRRC23	272	2.0237	1.98555	3.33478	2.75297	2.07036	2.47872	2.77226	2.63421	2.16657	2.45143	2.97976	2.55876	2.30795	3.01905	1.95924	1.62145	1.69614	1.82943	1.78466	2.50605	2.41495	2.22437	1.82708	2.41311	1.51479	1.93399	1.82088	2.30433	2.03617	1.36506	2.85374	3.1073	3.73787	2.13529	2.34203	2.33833	3.90991
BTK	273	0.210593	0.145665	0.051513	0.117632	0.247575	0.306272	0.091303	0.114903	0.116617	0.149301	0.524694	0.083844	0.151863	0.23935	0.120041	0.155668	0.09601	0.095744	0.100518	0.157892	0.290795	0.107345	0.088261	0.131375	0.169543	0.133699	0.169785	0.09877	0.116197	0.214236	0.166578	0.137842	0.195487	0.168095	0.304954	0.100549	0.084308
HFE	274	0.076154	0.18621	0.108088	0.059	0.359054	0.104411	0.062471	0.035881	0.103514	0.120922	0.379473	0.084137	0.072319	0.134128	0.115305	0.143505	0.124201	0.273656	0.134327	0.06093	0.272083	0.201644	0.199388	0.068545	0.225766	0.17446	0.241353	0.163646	0.201814	0.174839	0.094526	0.014863	0.132789	0.198473	0.153937	0.069421	0.023638
SCMH1	275	6.54089	8.84844	9.50586	11.107	6.58532	12.2676	8.71109	9.31764	5.8862	5.51684	5.76	11.6574	7.96682	5.58828	5.97434	7.26386	11.1113	9.77399	10.6697	16.7377	15.4211	12.8617	11.5399	14.2307	7.45816	7.07528	10.4707	12.9157	9.87306	8.04516	5.41594	16.1132	9.29765	8.66713	6.19068	7.77957	9.84942
FYN	276	27.5093	38.3642	33.3257	27.7525	35.2827	47.7288	33.8592	58.5884	30.9124	28.3616	30.0822	36.3108	34.0437	38.2549	35.0168	35.5072	27.0451	30.1535	26.9884	42.8779	39.0431	18.9973	23.49	19.7371	26.892	28.5982	23.5332	18.5268	29.8575	26.1894	35.9188	38.7855	33.9356	25.6163	24.3426	34.9882	25.7088
HIVEP2	277	0.631255	2.40178	6.87863	5.01827	11.5539	6.10072	5.42273	1.6544	0.906575	0.51879	1.39681	6.63405	7.79405	1.05204	2.57162	1.93869	4.37947	4.08399	9.13584	9.08101	12.2839	9.50176	3.93278	10.6053	21.5695	6.53165	4.87536	6.76773	3.15135	13.93	7.86195	6.80358	5.89026	48.904	21.706	29.2373	5.06674
FMO1	278	1.21188	0.705885	0.52356	0.330845	1.89906	0.107303	0.24584	0.174707	0.478691	0.552938	5.37113	0.097236	0.499012	0.59962	0.955089	0.792845	0.308699	0.442695	0.27723	0.179516	0.282367	0.129454	0.394846	0.258949	1.15703	0.420519	1.68813	0.122144	0.818053	1.57178	0.502254	0.047097	0.734562	1.00453	0.27183	0.222682	0.241246
TCEB3	279	11.3065	14.6806	13.7856	14.0019	13.6432	12.3737	13.8346	11.7924	9.33853	9.15176	9.4173	15.2152	13.8107	11.2368	11.3655	12.815	14.8026	14.6699	14.0594	13.6189	12.1913	13.6532	14.9303	15.2378	14.7205	12.9539	14.9351	15.0751	13.9457	15.7385	11.0734	15.0225	13.853	13.9135	12.1475	14.6781	10.6806
LYPLA2	280	15.0072	8.53328	10.7746	7.24071	9.40645	10.7173	6.88099	10.4116	9.94653	12.5074	9.77796	7.89304	10.168	12.8681	9.48602	11.112	7.61517	8.68054	6.84175	9.19286	10.8869	4.5578	6.14624	6.07843	6.85865	11.1887	7.52714	5.15604	10.2794	6.52673	12.7542	11.9302	9.22344	11.5814	14.4817	11.9041	9.74156
CLCN6	281	3.76527	7.14262	6.33113	5.99326	7.05127	9.68001	5.80115	6.66558	3.17895	2.90607	2.25191	7.71992	6.93156	4.57726	4.53344	6.18461	8.27394	8.11842	8.17751	8.83914	9.56755	7.76682	9.49877	8.69518	8.21706	7.38632	8.43786	7.26727	8.94076	8.24895	6.6467	10.7742	7.81773	11.4764	9.40189	11.6695	5.79635
MRC2	282	7.04347	10.1515	5.36405	9.47881	11.4272	5.32449	11.6517	3.16182	7.55417	5.37466	7.47257	10.6975	7.13424	8.0635	7.29896	10.4086	15.0037	15.5192	11.9772	2.97998	5.48111	12.6151	21.0282	12.0591	8.56616	11.9912	13.2046	17.6224	14.8156	11.2057	7.11996	1.6524	10.3966	2.94417	2.05811	1.54962	2.59253
NME2	283	96.6154	59.1394	72.436	69.3824	70.0013	59.0602	65.1777	69.4062	109.497	109.283	113.355	52.925	58.569	88.5192	80.2614	67.2769	48.5535	47.2288	51.3163	52.4538	40.2143	45.4199	46.0074	38.5819	44.0502	66.06	42.0977	51.1804	54.0792	46.3786	109.258	53.1399	78.2165	69.5823	69.0496	43.1916	111.564
SLC6A7	284	0.179354	0.853415	2.0198	0.653055	0.494772	2.18651	0.173872	0.474612	0.52143	0.467705	0.290607	0.668491	1.23619	0.06728	0.661214	0.331922	2.34672	1.69637	1.22785	3.31875	3.62801	1.55794	0.583629	2.04561	0.186821	0.356722	0.384473	0.351917	1.71717	0.266703	0.49926	4.27399	0.361066	0.364457	0.293778	0.858249	4.80589
TSPAN9	285	4.83162	4.52191	12.203	5.34169	7.38451	7.00029	6.01679	2.60714	5.35114	5.46239	8.93154	9.51764	7.90174	11.9391	4.37655	5.08195	4.20585	4.45674	6.51484	2.92121	8.302	7.72402	3.96651	6.00937	3.90704	9.73635	4.66481	5.06802	5.8605	4.19098	10.5767	52.8943	9.80197	3.86957	4.0873	3.8078	6.5623
BTBD7	286	6.22147	7.42034	4.28237	5.1493	5.66682	2.72932	5.76593	2.88546	5.99319	4.83403	4.57632	5.14062	4.86566	5.36655	5.29138	6.3919	5.7671	5.9123	4.8202	2.62535	2.93836	3.87649	6.07086	3.75538	6.25279	5.7395	6.43912	4.61722	5.27698	5.20711	3.36329	3.55111	5.18309	4.41033	4.06991	5.1015	2.24613
APBA3	287	4.93116	4.3038	2.02969	2.77227	3.14991	4.30059	3.19893	1.85633	4.39563	4.44578	3.62042	3.56081	2.67377	3.58884	2.99909	3.78295	4.4574	4.81073	2.68626	1.59478	2.90868	3.06732	4.09233	2.9518	2.26613	3.43051	3.70041	3.3253	4.30686	2.80662	3.27904	3.22811	3.64629	3.00192	4.05008	2.63022	0.956418
MKS1	288	10.6991	7.27294	5.26498	6.82782	5.7902	5.20316	6.5821	5.32438	8.83641	7.34029	6.98849	6.45588	5.10893	9.30204	5.60416	7.4989	7.97365	8.14125	6.01225	4.71467	3.90876	5.79444	7.94466	5.39435	5.69486	8.53538	6.70526	7.48194	8.61391	5.65273	6.5532	5.00767	7.2884	3.05065	3.97081	4.17764	2.42818
ABHD5	289	3.45365	3.11432	3.7861	3.61588	3.12847	3.53984	3.49029	2.32478	3.91519	3.88746	4.53494	3.31525	4.20965	3.41707	4.14986	3.57898	2.11313	2.08377	3.0224	2.39533	3.0775	2.13375	2.23314	3.05203	1.89556	2.62108	1.79726	2.54408	2.41296	1.83864	4.2303	2.51794	4.51381	2.45337	2.71499	4.07842	3.31805
KAL1	290	0.015167	0.29117	4.17163	4.83332	0.660103	2.63167	6.23474	11.8087	1.13201	0.376852	7.3075	2.03689	4.71668	3.68825	0.326487	0.088249	0.274605	1.89793	10.0379	13.4821	4.59017	2.38314	0.379802	6.12643	0.17861	0.975455	0.110157	8.90625	0.97528	0.1948	3.27375	1.56779	16.3986	0.941076	0.152492	0.07999	87.3241
AKAP8L	291	23.6233	37.0242	29.3882	26.4795	30.012	41.7865	30.6597	27.4774	26.4125	23.0591	20.8448	31.6289	24.6214	26.6637	24.3048	29.7916	58.6221	50.5672	34.9253	34.9352	48.004	41.212	54.4464	33.6978	43.9759	36.3808	51.5441	35.4662	51.5155	48.3438	22.6264	31.0254	24.8662	31.3183	29.3052	27.6277	10.8458
MBTD1	292	15.7021	15.1761	10.6351	13.1604	12.8086	7.93966	12.989	10.3518	15.5046	13.0429	9.95556	12.1485	12.5822	15.7344	12.7699	14.4983	9.30194	10.4027	8.38215	5.0872	5.3514	8.94742	10.2114	8.66315	10.6071	10.8819	13.7507	8.5271	9.98584	10.6405	11.6292	9.57421	11.7824	11.4839	11.549	13.0373	10.4276
UTP18	293	23.5106	15.3469	13.0863	14.9382	14.0601	9.26824	15.5562	13.8694	22.1755	23.8364	17.6478	12.3892	14.1968	19.5396	19.198	17.1277	11.182	11.1235	10.0121	6.89941	5.95619	8.64837	10.5617	9.43225	10.1342	12.84	11.7553	11.2715	11.4686	10.369	16.1339	9.72238	12.2352	9.95439	11.0224	9.26561	15.5141
RNF216	294	5.91204	7.0137	6.01146	6.3115	7.11504	6.08712	6.14666	4.61338	4.97345	4.37071	5.13204	6.53012	6.44075	7.3199	5.7583	6.78284	7.51701	7.01753	6.58721	3.60303	5.65887	5.19674	7.30252	5.56792	6.5117	8.17177	7.73764	6.60275	8.18937	6.22435	7.95792	7.18265	7.8301	7.46269	9.06184	8.77769	3.83057
TTC19	295	16.6374	14.1939	13.2147	13.7237	13.2264	12.6847	12.1029	16.692	20.0671	19.6741	18.659	14.6656	13.5127	18.5099	14.7675	14.5525	10.3099	11.421	9.84131	11.0448	11.2695	10.1206	10.2444	10.956	11.0577	10.7729	10.1412	9.3508	10.3199	10.7851	14.2478	11.0541	10.0235	8.94667	9.32163	8.46887	17.909
PTBP1	296	82.1962	72.6335	34.0256	54.9063	50.0144	26.4271	65.323	26.5912	76.8879	58.233	42.2054	48.9074	35.7457	82.8457	52.8271	74.4013	81.0262	82.0381	52.0689	16.3163	24.7933	45.1539	95.776	43.934	45.0245	75.5704	80.2972	80.4807	89.9866	51.6991	34.6564	15.1463	53.7344	11.0061	13.8289	9.65197	6.42804
DPF1	297	13.7688	18.7328	31.5851	21.4119	26.755	32.5605	20.5415	21.5855	12.4349	15.2111	10.4858	27.457	25.3159	6.70144	19.9912	18.8403	15.7879	13.8046	18.9595	21.5665	22.1897	15.7463	10.0289	15.7149	17.4321	10.9367	15.245	15.059	15.2683	18.6586	12.5196	36.9759	16.4116	27.2172	33.1462	22.5597	17.9303
SYT7	298	2.30558	8.94505	6.11567	1.36227	9.21395	13.5921	2.11641	17.4009	4.28966	4.726	2.56134	4.91978	7.05987	3.25089	6.9392	6.47594	10.2584	11.6476	4.72809	42.7792	17.404	4.05492	5.10287	6.10765	5.60073	4.87694	5.18378	1.47454	13.9046	7.6444	3.91914	7.86559	2.67588	13.2517	11.5591	16.6404	9.27572
LARS2	299	5.94988	6.44848	5.79403	6.90453	5.63342	5.18411	6.6416	3.93654	5.46859	5.12425	5.24418	6.90498	5.64311	5.55139	5.33965	6.78767	6.45564	5.69462	6.17323	4.10011	5.02252	5.98148	7.46019	5.47205	5.00507	6.391	6.56573	7.04397	6.2241	5.54874	5.65714	7.83034	5.96493	3.76022	4.22637	5.28975	3.77114
PIK3C2A	300	5.95683	6.58598	2.73686	4.97645	4.27976	2.60855	5.18093	2.65746	5.55407	4.99061	4.57064	4.89757	4.69014	5.48477	4.95819	5.59519	5.79918	5.92465	5.74657	1.92515	2.55185	6.71363	8.13688	6.15159	5.98057	5.72073	6.73628	5.51247	5.19699	5.67542	6.57186	2.50354	6.53703	2.32739	2.07485	2.37258	4.61334
PLAUR	301	3.19155	2.73784	0.962787	1.78275	2.04402	0.888643	1.71063	0.693869	2.15254	2.279	1.66064	1.4145	0.971205	2.73787	1.30316	2.6178	3.87335	3.59159	1.70656	1.07064	1.48	2.77513	5.39721	2.61742	2.86262	3.1237	4.68084	3.64322	4.26503	3.2978	0.943779	0.440588	0.873169	0.68616	0.558625	0.25172	0.17937
ANLN	302	9.77405	10.8242	4.39937	9.26349	6.01616	1.45177	10.6806	4.6826	9.48548	8.23214	6.57891	8.69084	4.73259	8.01542	7.60629	9.41798	13.3508	12.5085	9.81896	2.16106	1.64029	10.1142	15.4373	10.6269	9.40204	9.89763	14.2984	12.2404	11.6249	10.0334	3.82207	1.1988	5.89437	1.43823	0.646403	0.612655	0.63374
WIZ	303	9.38769	17.3263	14.8763	14.644	16.878	26.2862	16.4446	13.7499	7.92962	6.62962	5.08264	20.2021	14.9308	9.77691	10.3935	15.3609	18.5738	17.6054	16.7168	20.6957	25.3188	14.6125	16.9862	15.0878	14.5362	15.1665	18.1993	17.3399	18.0533	16.4049	12.1107	27.0255	16.2491	20.6141	21.3188	17.8255	8.50507
RABGAP1	304	11.536	15.391	14.4182	10.892	14.462	13.7718	13.2555	8.03356	10.4169	8.50516	8.92296	13.147	13.857	10.6644	11.1545	13.7065	19.3134	17.447	17.7795	12.8124	16.5894	13.9089	18.6857	15.6832	22.4283	20.0816	21.553	15.9253	17.6485	21.3928	13.7157	12.1579	12.379	15.1466	16.144	18.2792	8.22813
DCN	305	14.2772	10.1101	5.15676	1.79342	22.0319	3.58587	0.478975	0.507982	8.74714	17.3467	40.4352	0.450623	5.21563	19.7849	10.5864	12.5463	3.95743	6.03978	0.797389	1.17089	9.94734	0.395113	3.31589	2.19319	10.5304	12.5973	14.0837	0.311947	11.2386	13.1681	11.609	0.503916	1.07296	9.84438	10.1463	8.0292	0.929534
QPCTL	306	1.34057	2.38232	1.08373	1.57339	1.54585	2.47737	1.56183	0.84473	1.35881	1.26797	0.971189	2.07138	1.04147	1.37225	1.1097	1.91773	4.54542	4.92994	1.70535	1.84956	2.80128	4.77151	5.45333	4.12251	2.72106	2.32027	3.56144	3.4079	4.44844	3.82006	1.46472	1.52924	1.28582	2.95896	2.68103	1.22089	0.707959
PPP5C	307	13.7422	12.4856	12.689	11.6003	11.7242	11.265	11.2402	9.99141	12.8163	14.1556	11.9043	12.1427	11.3379	10.9916	12.24	12.9152	12.996	13.2972	10.079	10.1131	10.2021	11.8479	13.3624	10.1693	8.39583	10.7406	11.8312	12.0711	14.3908	9.9433	11.3254	13.7432	13.1616	12.0961	11.6758	11.5586	7.85478
CEP68	308	6.9737	8.18109	6.1561	8.91329	7.36979	6.00263	7.94977	5.89639	6.76386	6.24537	6.04306	8.65386	7.74735	7.8763	7.19335	7.25979	7.19475	7.47525	8.08454	4.76697	5.75583	7.43929	8.16235	7.95011	6.75877	7.42411	7.28476	8.52561	7.61577	7.43849	8.98947	8.39553	9.66586	10.3718	9.31716	10.0388	6.87778
MAP4K3	309	8.24264	9.06603	6.42052	7.42997	7.98506	6.07023	7.43586	7.56282	7.62739	8.00591	7.87991	7.88423	9.12915	7.76632	8.14869	7.53331	5.70907	6.72492	5.94344	5.36736	5.15466	6.37491	5.94474	6.70486	6.77476	6.40158	5.35619	4.74454	5.93548	5.83898	9.35247	7.7187	8.61902	10.0861	9.57056	10.6308	14.1236
ZBTB32	310	0.002209	0.018414	0.004491	0.037441	0	0.131527	0	0	0	0	0.069102	0	0	0.019151	0	0.054439	0.013652	0.066029	0.007134	0.087147	0.054018	0.06114	0.016437	0.086998	0.074468	0.051897	0.040591	0.042536	0	0	0.035566	0.084887	0.019987	0.105551	0.019306	0.036776	0.022501
TYROBP	311	4.03625	1.91903	2.53714	2.10567	6.39584	6.53483	1.80367	1.52427	2.45087	3.56558	9.7716	1.40982	2.54429	7.01459	3.56386	3.0445	2.97951	2.00982	1.36022	2.7843	7.54508	0.777933	1.79184	1.59941	5.7297	4.5861	2.39674	1.35561	4.13025	3.64832	4.76286	3.43606	4.98132	5.02736	8.20796	2.79673	1.44143
TMEM159	312	11.8764	10.1874	12.1377	16.6941	10.1987	5.14679	12.4179	12.8976	11.2214	12.7704	15.6811	12.5543	8.57715	11.4525	12.8465	10.7096	11.1946	12.7843	10.2289	6.6636	4.44598	13.3724	8.60312	10.8605	7.5579	10.6475	9.2837	13.7184	11.8449	9.96766	15.9293	21.5513	11.0711	23.3203	37.7966	37.4966	6.82802
GABRA3	313	5.51526	8.26355	25.9306	9.21238	15.5954	23.0405	8.34585	12.0479	5.50129	5.56147	5.74137	11.3339	27.9675	5.27792	7.48369	7.64795	9.87715	10.9077	25.9445	35.1508	30.9346	9.0794	5.13406	18.7957	17.7956	11.8221	10.7092	9.74171	12.0603	14.4506	12.3573	25.3022	20.6357	23.7226	32.0168	45.1175	24.424
BRCA1	314	7.20078	8.22204	3.31962	7.18331	3.86573	1.42021	7.52452	3.23578	6.61495	4.86024	3.01883	7.45156	3.2609	5.90678	4.71893	7.00008	5.71092	5.51092	4.71404	1.59418	1.15952	5.51452	7.36332	5.62692	4.60095	4.19586	6.98245	6.27687	5.08939	4.49398	2.01765	0.743253	3.17556	0.096209	0.185605	0.094403	0.930129
ERCC1	315	18.506	14.9776	13.3165	17.324	14.5891	10.9007	16.2322	13.8693	18.1885	17.9389	16.1497	13.6961	12.7983	20.9495	14.7263	15.6213	19.9031	21.4886	16.5127	13.6258	11.1328	15.3551	19.715	14.0365	13.6612	20.5051	16.3763	21.7206	22.64	15.2865	18.1434	11.5613	20.0941	12.6816	12.0511	9.23536	8.02727
CD22	316	0	0.011099	0	0	0.034222	0.012837	0	0.014561	0	0	0.127253	0	0.010244	0	0.027804	0	0	0.024852	0	0	0.013023	0	0	0	0	0	0	0.012819	0.034784	0.005866	0.067242	0	0	0.009382	0	0.021725	0
SEMA3B	317	0.255298	0.472923	0.280688	0.254742	0.87841	1.08961	0.146449	0.098344	0.171581	0.193763	1.42163	0.345046	0.259718	0.699767	0.251624	0.26778	0.480335	0.781877	0.197871	0.27562	1.50524	0.601441	0.429246	0.75828	0.441141	0.413854	0.675595	0.334743	0.652601	0.938862	0.454595	0.531422	0.376205	1.04963	0.57943	0.250799	0.21559
MBTPS2	318	4.22556	3.64116	3.55524	3.86999	4.04289	3.45266	3.74643	4.03129	3.76258	4.14477	4.31614	3.43151	4.66463	4.1577	3.89036	3.8391	3.15493	3.41653	4.13933	4.04424	3.98087	3.01539	3.59105	4.12406	4.30404	4.19044	4.05729	3.36233	3.09867	4.07482	4.70066	3.13665	4.19942	3.41226	3.60102	3.76715	8.74172
PRICKLE3	319	1.74858	0.916485	0.276586	0.642604	0.616028	0.235969	0.436287	0.145781	1.07459	1.01898	1.14459	0.386763	0.300213	1.39315	0.634456	1.15331	1.63665	1.26284	0.566936	0.245515	0.412303	0.46761	1.42467	0.870022	0.530465	1.16269	1.29412	0.861343	1.58638	1.06493	0.923983	0.498564	1.13436	0.697204	1.23816	0.865147	0.490625
LTF	320	0.042065	0.016919	0	0.007761	0.026442	0.009918	0.032895	0	0.083745	0.033995	0.130948	0.009335	0	0.026636	0.043559	0.008686	0.009602	0.019073	0.011175	0	0.010063	0	0	0.009992	0.011404	0.017643	0.028227	0.019541	0.035713	0.01838	0.010334	0.029382	0.01849	0.051042	0.097926	0.008393	0.05112
EXTL3	321	13.3071	15.2295	13.8947	12.5693	15.5174	11.8551	12.1432	17.3423	17.1833	16.3813	15.6292	14.2398	13.7357	15.3199	16.387	15.0085	20.8307	21.3866	15.2544	17.893	14.5553	12.7467	21.3571	12.6131	14.7821	18.2619	15.234	14.5034	21.8259	16.246	10.7456	20.5246	12.4234	15.2374	10.9012	10.2588	10.8455
NR1H4	322	0	0	0	0	0	0.012029	0	0	0	0	0	0	0	0	0	0.010678	0.058863	0	0	0	0.012204	0.013216	0	0	0.01402	0.021987	0	0	0	0.022751	0.038638	0.01215	0	0.01758	0.032861	0.061632	0
ELOVL5	323	25.3825	23.8916	20.4208	33.3222	23.2693	14.6585	28.7082	24.8593	26.0165	25.1059	21.5011	26.4117	23.8158	31.6202	24.5946	23.9194	25.9461	27.7462	29.0883	18.6532	16.8008	26.0187	30.7487	31.9041	24.7818	31.4963	26.0514	32.8277	27.2307	27.9028	28.8212	14.5409	26.0295	14.3905	14.6937	19.9209	21.2264
ALOX5	324	0.057413	0.049239	0.04749	0.062976	0.010223	0.193136	0.009593	0.044197	0.012252	0.013263	0.050342	0.064234	0.009265	0.092125	0.037977	0.010029	0.064721	0.116101	0.0612	0.023272	0.260476	0.120935	0.04074	0.023232	0.079364	0.161015	0.087011	0.068308	0.113363	0.064102	0.072411	0.03408	0.104857	0.067534	0.196257	0.081325	0.032701
KDM5D	325	2.78076	4.11383	3.27084	3.83382	3.19577	3.06501	3.5466	2.32267	3.06643	2.20541	2.57971	3.9396	2.79162	2.88197	2.55756	3.25636	6.79926	6.86574	5.203	4.07139	4.02772	6.52031	7.39985	6.15024	5.21202	4.86821	6.2908	6.79455	6.43518	5.51058	0	0.039322	0	0	0	0	0
CALCOCO1	326	9.70059	11.8093	8.76294	7.40063	10.8072	8.1332	8.36197	5.68655	7.21172	8.43023	7.64112	8.59436	8.76438	7.49796	9.43907	11.5764	13.4348	12.152	9.6998	7.12749	6.6015	10.8319	12.1563	8.92833	11.6406	9.79043	12.8256	8.84042	12.1017	12.9095	9.9741	9.48558	9.4019	12.2155	15.1309	11.405	3.28366
UBR7	327	37.3014	29.8125	27.4443	31.5753	25.8427	14.7212	30.864	17.3916	31.2919	34.3905	22.8336	27.4098	26.3928	29.7751	28.2165	30.3476	25.2121	24.0388	26.8394	13.4076	14.7336	22.2772	24.9891	21.3778	23.231	25.9404	24.7168	31.0581	24.7119	23.7286	24.2158	21.6948	29.7506	18.1728	20.2701	20.5384	15.5298
MAP4K5	328	4.96839	7.49844	4.2151	4.89628	6.32853	4.0302	4.95527	5.0841	5.32942	5.4258	6.56181	6.13947	6.19569	5.014	5.43607	6.19317	5.14918	5.91115	3.62284	4.28285	3.5449	5.17455	5.59631	6.32267	6.25221	4.33109	6.26846	3.06962	4.96863	5.43874	6.22324	4.04425	4.11344	7.14623	5.84396	7.04436	5.82907
EHD3	329	2.74548	3.02373	3.58777	1.62228	4.05943	5.11994	2.094	1.60288	2.33388	2.38215	3.90121	2.50898	4.09142	4.22943	2.44791	2.72012	2.24292	2.14625	2.63852	2.31253	5.64711	1.43146	1.59228	1.83466	2.53145	3.83191	2.47773	1.45337	2.88508	2.34162	3.43755	5.37483	3.10889	3.36421	4.84096	5.53315	2.49619
PSMC4	330	81.51	72.126	73.9466	71.9913	71.2411	66.1839	72.1839	68.9884	72.0651	85.2748	68.9683	68.7898	66.9927	69.1917	84.0327	77.6197	55.2504	55.6064	46.746	48.3154	43.5868	40.4857	51.0241	39.4737	42.3992	52.6691	51.8834	52.2605	54.2876	46.3373	46.1175	56.7498	57.8676	45.6504	47.6089	48.598	29.0891
MAN2B2	331	1.49984	2.22504	2.42007	2.21096	2.62856	3.23948	1.7533	1.79062	1.2346	1.12272	1.5667	2.25385	2.31306	1.55525	1.48842	2.19022	2.33187	2.35137	1.81268	2.58715	3.21502	2.23773	1.94743	1.84931	1.93057	1.77664	2.13795	1.60879	2.46609	2.33698	2.0926	2.62666	1.82619	3.12528	3.14215	3.8633	1.52571
SLC7A14	332	0.230002	0.332932	0.954161	0.264906	0.669327	1.25057	0.122695	0.356634	0.247349	0.143058	0.443034	0.551347	1.16151	0.336231	0.289925	0.272803	0.343594	0.455169	0.943978	1.15752	2.86289	0.350194	0.201839	1.1141	0.701242	0.503884	0.579717	0.215451	0.430359	0.665652	0.724076	1.02574	0.396911	0.764461	0.698783	0.98004	1.24554
CLDN11	333	3.10263	2.64602	3.01112	0.269341	19.6118	1.91763	0.049054	0.259503	2.4774	3.71121	31.3065	0.086704	2.61469	9.10959	4.38729	2.94774	1.24761	2.68674	0.251892	0.218773	7.11676	0.104536	1.01824	1.76576	4.37213	7.96067	4.31181	0.113697	3.83781	7.2892	6.84743	0.256986	0.340302	4.84598	2.32877	2.47236	0.561624
SLC25A39	334	47.9863	28.6453	27.2896	28.8157	28.4347	29.2985	26.1091	23.8231	43.4875	49.8297	62.9379	26.3667	27.4774	58.3461	37.766	32.9821	33.468	40.7289	31.8593	26.2814	36.385	27.2599	34.479	26.0537	23.2483	50.0151	32.9481	34.5261	52.1553	30.1504	44.3494	23.9777	35.5876	25.5237	36.2157	28.2959	21.9901
MVP	335	0.829003	0.927852	0.790987	0.54985	1.76971	1.07708	0.271683	0.509014	0.69423	0.661382	2.85316	0.348979	0.645106	1.20663	0.7398	1.03177	0.998309	1.14091	0.745635	0.743166	1.90674	0.597079	0.824402	0.770516	0.742343	1.21368	1.00027	0.402566	1.20244	1.21064	1.09375	0.645592	0.623097	1.24217	0.895168	0.948761	0.597348
NUB1	336	9.96877	10.5318	8.67152	9.31622	9.31557	9.01327	10.1781	10.1839	10.063	9.38319	8.81278	9.6862	8.79336	10.7647	9.33534	10.1129	9.43942	8.9324	8.2569	7.24843	6.80205	7.7908	10.1335	7.75927	8.97537	8.74234	10.9718	9.34528	8.85589	9.1597	7.38227	6.15168	8.04756	7.66613	5.50948	5.33872	5.51407
PGM3	337	8.51773	7.40641	5.37404	7.5743	6.2242	4.6392	7.11463	5.74849	8.26923	7.91402	6.98537	6.48077	6.41608	7.62083	7.16572	7.26351	6.9537	7.24366	7.03262	4.55063	4.93147	7.07557	8.0264	7.41223	6.74003	7.27921	7.25912	8.26016	6.79883	6.41499	6.89411	4.48407	7.10462	4.61343	4.31151	5.15383	6.7225
RWDD2A	338	4.1188	3.5208	3.67456	2.89123	3.71773	3.38828	2.55136	3.30315	4.35961	5.09547	3.36173	3.29815	3.57998	3.58651	4.5969	3.36587	3.88173	4.82302	3.98515	3.54429	3.12546	2.68235	2.9552	3.39107	3.80734	3.81526	3.47539	2.32018	5.06857	3.82574	5.62436	3.18901	4.45336	5.66722	5.93668	6.50564	7.17062
CLK1	339	8.7643	10.5579	8.03062	8.36882	7.26053	8.26164	8.80887	8.07434	6.18818	8.40872	7.81985	9.86298	6.84343	5.82016	7.76687	8.23674	24.6914	18.5988	21.0392	18.5686	11.9118	31.3707	25.8322	28.2196	21.6478	12.1766	31.2212	25.7182	14.952	25.9923	19.4956	22.7458	21.519	21.2573	19.4865	17.5129	19.8381
POLR3B	340	4.16464	3.87818	6.24717	5.33943	4.68494	6.00547	4.64085	4.80765	3.56489	3.88122	4.54679	4.75856	5.32379	3.86972	3.76393	3.6595	3.15115	3.08798	5.28764	4.55668	5.90053	2.94767	3.07736	3.67449	3.77109	3.64586	3.28288	3.99041	2.94278	3.91988	4.59965	6.67122	5.78578	4.07637	3.86923	5.60688	4.06407
ANGEL1	341	2.94592	2.58195	1.8802	2.50651	1.89227	2.2398	2.27751	1.83384	2.15108	2.24304	2.32985	2.64465	1.92341	3.12965	1.71788	2.67134	4.73379	5.12599	3.7541	3.45402	3.951	4.94688	5.68789	4.72646	3.07761	3.74082	4.20224	4.10043	4.85852	3.38271	1.69332	3.12113	2.62863	2.13843	1.79716	1.57035	1.07456
RNF14	342	7.19882	5.41465	8.24496	7.7702	7.40357	7.79804	6.96068	9.14076	6.54505	7.45958	9.89758	7.79906	9.16778	7.5183	8.22501	5.75001	4.72911	5.34896	7.95556	7.83745	7.86031	6.23965	5.35249	7.14901	6.69439	6.54959	5.37614	6.47105	4.73723	7.37867	10.3683	9.94038	10.0879	8.51278	7.63994	8.5759	19.0636
DNASE1L1	343	2.6538	2.10039	1.50904	1.29166	1.94634	1.81483	1.09228	1.40712	3.36773	2.32125	2.45913	1.3385	1.31182	4.03427	1.40338	2.00325	1.90414	2.2418	1.06882	2.04429	1.7624	1.00289	1.93198	1.21752	1.11357	2.79472	1.89548	1.15055	3.03235	1.39084	2.46708	1.19987	1.17503	1.23985	1.20488	1.17015	1.22857
DDX11	344	2.29888	2.79714	1.3356	2.34902	1.62655	2.17001	2.39332	1.66476	2.54028	1.51687	1.25659	2.65613	1.38963	2.47333	1.60971	2.29882	3.45813	3.42449	2.25553	1.62416	2.05333	3.40162	4.0068	3.14739	1.98102	2.85013	3.91165	3.46034	3.7951	2.38061	1.03844	1.013	1.64545	0.660642	0.68237	0.565063	0.392117
HEBP1	345	6.91491	4.01644	4.10795	4.57328	4.41622	1.99052	4.83234	4.69875	6.4467	7.09988	10.035	3.78254	3.10354	7.84497	4.92999	4.77678	4.70959	5.42621	4.05446	3.3419	2.31551	4.49871	4.54301	3.02381	2.98448	5.26362	4.31099	5.26009	4.97054	3.79616	4.76076	1.86752	5.46431	2.61546	3.83382	4.61885	4.682
GPRC5A	346	0.068456	0.021687	0.062411	0.039795	0.273053	0.020067	0.021011	0.043562	0.005367	0.02905	0.133218	0.037773	0.040584	0.0406	0.060925	0.035086	0.029008	0.043707	0.028261	0.020389	0.188249	0.032624	0.01343	0.056285	0.151628	0.076891	0.13386	0.070069	0.063315	0.113088	0.021123	0.009998	0.018832	0.174492	0.009095	0.025471	0.010601
MAMLD1	347	3.25961	5.83191	3.7385	4.34142	5.90186	2.46183	4.76142	0.895694	2.42644	1.54042	1.23133	4.27647	5.7964	2.79707	2.80041	5.08527	9.08105	7.93956	7.46951	3.08453	5.18773	6.12606	10.2328	7.06701	9.0282	6.22075	8.99979	6.97114	7.29634	8.17485	3.43703	3.3721	4.36995	5.18372	5.79424	2.90835	1.61834
CD6	348	0.060031	0.036399	0.080554	0.005516	0.069126	0.208499	0.005904	0.359326	0.007541	0.024379	0.069873	0.013268	0.096627	0.113915	0.054539	0.018517	0.027109	0.013646	0.048935	0.198575	0.163988	0.037991	0.012495	0.070132	0.008215	0.035552	0.017972	0.007039	0.038026	0.013151	0.043662	0.099086	0.05685	0.006492	0.048437	0.047555	0.066921
TACC3	349	24.9532	24.8794	13.628	28.1595	14.7626	5.76293	29.8291	11.6133	23.4488	19.9725	12.3135	25.6291	11.2481	21.1414	18.5153	24.9162	29.3741	27.4509	20.2533	4.9093	4.82069	22.9151	30.6407	18.9052	13.3162	19.1083	23.9209	33.6927	25.9239	16.0599	9.57085	2.90522	18.2082	0.531352	1.00436	0.647912	0.842784
UFL1	350	8.20018	6.97532	4.29991	5.69339	5.17047	2.53048	5.82183	5.39593	8.89413	7.46471	7.47238	5.34335	5.18725	8.7674	6.33617	6.52972	7.48894	7.07852	6.15342	2.86373	3.13176	6.07964	8.16698	6.18624	7.00606	9.25423	8.91924	5.54853	7.84481	7.02953	4.59777	2.60719	3.53211	2.52549	2.86203	2.37957	3.67644
POLA2	351	9.7653	7.33777	4.79278	9.37565	4.63419	2.29625	9.1417	4.31257	7.85534	7.83944	5.2663	7.36753	4.36967	6.86785	6.62027	7.80478	9.12047	8.582	7.34178	2.27356	2.31176	7.38161	10.3787	6.957	5.3983	7.48806	8.35348	11.4229	8.90815	6.33587	4.24418	2.1619	7.51514	1.24388	1.67099	1.59051	1.0757
ZC3H3	352	6.58248	8.07744	6.94825	6.86882	8.06022	10.3947	8.01792	5.58923	5.19427	3.86573	4.04172	8.19536	7.64685	6.7499	6.48079	8.0348	8.89534	8.65061	7.45484	6.6916	9.19229	6.39551	9.20936	6.55043	7.42896	7.90213	9.71803	9.33672	9.0828	7.01966	5.42259	9.70595	7.16036	9.1256	10.9263	7.38343	3.02336
CAPN1	353	8.69463	8.31239	11.2884	10.5255	10.7401	13.1717	6.95462	17.9471	9.14607	8.78562	13.19	9.29361	8.08771	13.7846	8.78271	9.53558	7.74298	9.13876	7.3669	18.2067	13.3016	6.915	6.14553	7.44586	5.98319	10.4306	7.03289	8.66549	11.6836	7.88228	13.9311	14.199	10.6241	12.4888	15.5804	18.2946	11.2367
ACPP	354	0.025775	0	0.020959	0.015874	0	0.010074	0.016877	0.00972	0	0.011509	0.033138	0	0.00804	0.072103	0	0.017644	0	0	0	0	0	0	0	0	0	0.06321	0.0192	0	0.009099	0	0.021281	0	0	0.029855	0.01814	0	0
MDH1	355	34.5458	23.359	36.4084	31.1599	26.9742	19.9294	26.2324	20.7277	30.473	36.8578	33.6043	24.0488	31.765	28.1	26.9644	25.233	20.4766	20.6316	26.7923	22.8422	24.4599	24.4371	19.7375	24.3518	20.8716	25.1211	19.9429	24.391	22.0008	21.2393	41.0968	28.0771	29.2604	25.1925	27.9773	23.7231	52.6332
SLC30A9	356	33.9504	29.78	28.0041	31.5256	30.1947	23.184	28.3556	32.431	35.3719	39.8489	35.778	29.7529	33.0532	30.8462	37.6498	28.913	18.0626	19.3439	26.0474	26.7967	23.469	20.3683	19.5095	24.5822	25.6954	25.1735	24.0646	21.8709	18.3521	25.3104	33.1406	23.8787	24.1198	25.8653	25.4042	29.9249	53.6946
MTMR11	357	0.926232	0.739771	0.512056	0.830477	0.873287	0.492989	0.795852	0.281847	0.751924	0.782452	1.60674	0.729705	0.673007	1.11749	0.688501	0.799291	1.52142	1.58936	1.06037	0.397125	0.609237	1.44407	2.03071	1.34135	0.846474	0.970661	1.12262	1.62273	1.22406	1.43823	1.50665	0.533298	1.39959	0.176236	0.302613	0.15874	0.56965
COX15	358	16.1568	12.3184	11.0607	13.3291	11.1784	8.41708	12.1427	10.2564	12.7317	12.4743	10.4185	11.8567	11.3049	13.8878	11.4712	12.0851	10.4608	11.6327	10.6591	10.1638	9.45705	11.219	11.3307	11.168	11.0773	13.7206	12.6781	13.3001	12.3686	10.6442	10.329	8.79758	10.5834	8.72074	10.7433	10.827	7.5557
CCDC88C	359	8.30031	10.1832	6.50142	6.39904	6.88265	5.74608	7.71418	6.39294	12.2954	9.83921	7.18178	8.74243	4.45347	8.3904	8.04759	9.19189	7.64142	7.23483	4.37222	4.70203	4.78613	6.50049	7.84319	5.05073	6.26123	5.37566	7.48646	5.43441	6.94624	6.48287	4.40198	16.842	5.74945	2.73382	2.22305	3.00569	3.1454
YAF2	360	3.35848	2.46349	2.35208	3.07961	2.40998	1.668	3.18572	2.96339	3.64257	4.23046	3.15198	2.69975	2.65565	2.83144	3.50594	2.38175	2.96969	3.30968	3.094	3.17064	2.40968	3.41853	3.62372	3.4039	3.04668	3.24012	3.33534	3.99479	2.88188	2.74115	2.6833	1.7126	2.57535	2.01756	1.91032	2.12676	6.25737
ZMYND11	361	20.2088	25.5949	25.8594	21.6231	26.7482	24.6633	23.1906	20.9177	23.8062	22.0471	25.9889	26.8615	31.1614	21.5742	26.3978	22.4174	20.6304	20.4857	23.1007	22.7866	22.8383	20.5179	19.8282	22.9327	25.6095	20.789	20.803	17.9381	19.0364	23.0349	31.1677	28.2154	24.0946	32.2352	28.0915	30.7029	51.5601
WAS	362	0.255418	0.481501	0.438345	0.333883	0.578855	1.22998	0.309328	0.220464	0.37668	0.386433	0.852887	0.387831	0.41186	0.711207	0.524722	0.476179	0.254758	0.362563	0.119027	0.344753	0.498566	0.232375	0.266402	0.392982	0.327887	0.531627	0.400881	0.175196	0.538641	0.297237	0.315568	0.314142	0.212865	0.414031	0.51111	0.356383	0.074495
DPEP1	363	1.04093	1.01812	3.89298	4.18304	1.33504	1.38815	3.77346	1.52879	0.712807	1.05543	1.49642	2.56062	2.00097	1.90885	1.12945	1.10937	1.69093	2.00393	3.5094	1.9985	2.23161	3.99255	1.49903	3.90397	1.32487	2.36724	1.59532	6.0054	2.05017	1.85231	2.13249	2.54634	3.49868	0.889945	2.19494	1.16469	2.50967
BID	364	11.4035	8.3412	8.60712	7.56329	8.73558	5.6347	7.19663	3.81829	9.5918	12.0585	9.15424	7.48558	8.07219	7.56989	10.0565	8.9307	6.92485	6.056	5.8997	4.23896	6.12073	4.9728	6.57705	5.37185	5.99376	6.40738	5.1577	5.67523	6.45726	5.60351	13.3719	9.67222	9.16412	12.5942	11.8716	11.5288	10.5132
MATR3	365	83.9784	69.2413	82.9555	80.4362	71.4626	55.0925	78.0013	91.7207	80.2817	86.8793	72.0614	72.1725	84.7983	75.6497	87.2292	69.6332	51.3277	50.11	74.5247	73.7166	57.7391	61.8841	48.1891	60.8178	63.6218	65.4735	55.0125	65.2305	46.7963	58.8165	99.2928	59.6791	73.8993	67.9324	65.035	66.761	138.608
NPC1L1	366	0.006853	0	0	0	0.021421	0.015853	0	0	0	0.009306	0.00889	0.00746	0.013001	0.007225	0	0	0.023231	0.023334	0.002936	0	0.008152	0.017182	0.00717	0.008206	0	0.007244	0.015314	0.008024	0.014515	0	0.016974	0.016013	0.007541	0.01786	0.007185	0	0
XYLT2	367	2.33807	2.91337	1.60856	1.64911	2.99714	3.60878	1.86368	1.34678	2.71652	2.4742	3.67652	2.02053	1.92126	3.21854	1.94599	3.01963	3.66215	3.73575	2.37224	1.41981	3.974	2.45041	3.70359	2.05394	1.94138	3.4955	3.26569	2.61634	4.50056	2.52323	2.57513	2.0531	2.22433	1.92257	2.53926	2.46881	1.23459
RGPD5	368	0	0	0	0	0	0	0	0	0	0	0	0	0	0	0	0	0	0	0	0	0	0	0	0	0	0	0	0	0	0	0	0	0	0	0	0	0
STMN4	369	26.2758	31.1775	125.978	64.6191	64.8799	140.779	55.5368	123.142	34.4017	31.1554	55.4357	77.3934	86.8268	56.3113	44.1931	32.6441	68.2687	71.9643	96.8753	127.655	121.271	75.7499	58.6122	81.8586	75.8762	82.7251	60.3911	59.1827	70.9873	76.3504	70.46	116.426	54.7884	107.814	72.2537	94.5323	89.4217
NUDCD3	370	18.8228	15.8886	28.2834	19.3779	22.6597	25.234	16.8544	19.4247	15.8653	16.7426	19.1775	20.2673	27.4212	17.2963	19.2514	17.4594	19.5497	18.7875	26.2227	31.3813	32.5016	17.8465	17.3752	20.0523	20.1454	23.544	17.4069	19.2039	20.791	19.6802	22.1286	36.403	25.8879	35.2897	26.2613	31.5125	22.9302
ISL1	371	0	0.22712	42.4169	23.4443	2.93111	0.750233	8.70032	0.410594	1.09418	0.182044	0.695288	24.2281	7.91078	0.070913	1.02526	0.023019	0.038171	0.482273	3.72743	0.147533	0.079647	14.4073	0	12.8291	0.015319	0.0237	0	5.57075	0.177752	0	0.096613	45.7759	2.8969	0.009738	0.011914	0.033366	4.70668
CHDH	372	0.375807	0.312638	0.657035	0.912059	0.395265	0.599812	0.868468	0.35508	0.44871	0.327058	0.624926	0.728301	0.481407	0.695695	0.299829	0.374767	0.349319	0.391777	0.876989	0.968322	1.29293	0.978558	0.675792	0.968542	0.184441	0.347383	0.392964	1.48838	0.319567	0.338202	0.525012	0.625409	1.64033	0.34732	0.040886	0.105189	0.603025
IL20RA	373	0.00761	0	0.028229	0.021526	0.024115	0.018091	0.030104	0.017455	0.067615	0	0.040035	0.050852	0.007318	0.089256	0	0.007921	0.008757	0.017513	0.010191	0.009253	0.027532	0.029412	0.016144	0	0	0.016311	0.02586	0.063232	0.01601	0	0.152351	0.666879	0.101752	0.006702	0.0082	0	0.047785
CLCA1	374	0	0	0	0	0	0	0	0	0	0	0	0	0	0	0	0	0	0	0	0	0	0	0	0	0	0	0	0	0	0	0	0	0	0	0	0	0
CLCA4	375	0	0	0	0.009174	0	0	0	0.002865	0	0	0	0	0.006827	0	0	0	0.011195	0.011195	0.012677	0	0	0	0	0.011012	0	0	0	0.011549	0	0	0	0.023047	0.010706	0	0	0	0.024106
GLT8D1	376	13.8638	10.7488	10.8687	12.2512	10.173	9.12336	11.2456	8.83644	11.9466	13.2568	16.3992	11.6378	11.1114	13.317	10.1052	11.0502	9.96782	10.1846	10.9231	6.95444	8.29649	10.3058	9.1548	10.5601	9.7065	10.995	10.5423	10.6027	9.49355	9.73156	14.9741	9.89802	12.9254	9.43444	10.9787	9.26231	12.6397
ATP2C1	377	15.163	17.2176	19.6163	15.5056	17.5446	16.6732	14.9917	14.5888	14.8252	15.5915	14.6165	16.0255	19.7624	15.812	16.8641	16.3142	15.0512	14.1372	17.2469	18.7152	18.8007	14.8609	13.6895	15.5861	20.1896	16.7341	16.1509	13.0075	14.1976	18.7112	17.6912	17.6188	16.2176	18.98	19.9266	21.5809	24.0256
SRCIN1	378	2.22208	5.58795	6.7336	3.80223	6.3667	17.7039	3.59912	6.90903	3.4503	2.35857	1.98982	7.50561	6.37588	2.37844	3.54796	4.79641	7.3387	7.00365	5.87064	11.7492	16.3379	6.11559	5.78419	6.17213	7.27753	4.87121	6.30687	3.63768	7.41305	6.82429	5.40723	16.6766	4.35114	14.0792	12.3764	11.1484	5.88907
IGF1	379	0.11599	0.095024	0.271697	0.140704	0.774779	0.203899	0.091944	0.025248	0.14551	0.103041	4.90133	0.15756	0.295746	0.48913	0.248689	0.197075	0.070864	0.226887	0.176896	0.085589	0.312988	0.158752	0.084003	0.309919	0.231548	0.471094	0.308681	0.067943	0.302348	0.256283	0.51902	0.583518	0.204888	0.352442	0.2324	0.172543	2.38215
SLC38A5	380	12.8413	9.75397	15.0439	11.1008	13.6448	8.31448	9.34993	8.18536	9.19642	13.8986	11.991	7.41675	10.1696	23.324	11.8834	10.7505	5.1132	5.86915	8.03409	7.56336	8.50795	6.78829	5.60387	7.2609	7.09779	12.2511	8.60784	9.98625	8.54097	7.81801	10.1738	8.05922	9.0583	7.73209	10.6086	8.22243	5.94837
MAGIX	381	0.138319	0.140225	0.434467	0.250427	0.281817	0.734628	0.100317	0.419366	0.255768	0.187967	0.285867	0.144704	0.352001	0.221621	0.156663	0.119554	0.099375	0.123876	0.29786	0.584527	0.536205	0.21287	0.167734	0.27022	0.298432	0.169049	0.17086	0.119133	0.170402	0.137025	0.332472	0.841101	0.343676	0.512513	0.47165	0.23849	0.531766
RALBP1	382	10.1099	11.0496	9.30522	12.2052	10.8299	9.34071	12.5029	12.1015	9.83319	9.41041	10.3199	11.3938	8.36948	11.7416	10.0626	9.9971	11.3208	10.7094	11.9084	7.22926	8.26617	9.07086	12.7757	10.2403	10.8547	9.91289	12.0583	13.0968	9.93962	11.2623	7.76958	6.59823	10.5135	7.34094	8.09975	8.31999	4.59298
RUFY3	383	19.9302	25.9436	44.9842	36.1337	37.2685	44.618	29.9264	55.4635	22.4564	25.7994	29.6862	36.2815	49.2864	26.5187	31.3642	21.0547	20.1361	22.8747	41.3425	61.9468	55.0388	27.6978	14.4745	34.7614	34.3854	29.7832	23.7915	23.8572	21.1769	31.8596	55.3543	40.3074	35.089	38.9481	32.7178	45.4546	150.424
CNTN1	384	9.44111	10.8501	16.1603	4.74332	21.0184	12.9778	4.1464	8.91095	8.69854	8.16161	11.1073	9.12123	25.1068	3.41	11.9332	11.3674	13.3894	12.7833	15.2526	36.0138	30.8419	6.79743	7.43523	16.1946	26.5552	16.2217	15.6379	1.7586	15.7712	24.2239	26.0509	15.1976	12.6613	47.2893	50.3369	46.262	61.7888
SLC11A1	385	0.004159	0.029516	0.025366	0.015422	0.026062	0.072758	0.016285	0	0.005218	0.011296	0.070003	0.02295	0.027511	0.035084	0.019233	0.021296	0.040386	0.03764	0	0.049485	0.115339	0.036715	0.03464	0.029681	0.011291	0.035117	0.027885	0.028958	0.021965	0.029279	0.020604	0.019307	0.027213	0.014453	0.017385	0.004127	0.005083
WWTR1	386	2.0552	2.61061	3.04224	13.0177	3.8826	1.92005	6.09132	1.63199	2.23912	2.56775	8.8655	6.39851	2.02788	5.03777	3.09998	2.59512	2.67071	3.32544	5.16971	1.2564	3.1266	9.00254	3.14092	14.6203	2.93552	3.81777	3.13148	10.6488	3.50917	3.17083	3.17996	1.75013	3.55589	1.64449	1.58535	1.59847	1.70223
AGPS	387	12.3503	11.4652	7.32073	9.17564	9.6497	5.79727	8.37028	8.32927	13.6761	14.0674	11.3921	8.9389	9.27563	10.1836	13.5632	11.0876	7.70837	7.78364	7.12503	6.34243	6.02203	7.2002	7.88782	8.04448	8.90543	8.26507	9.05912	6.7641	7.33514	9.34124	9.69803	5.35093	6.15887	6.73777	9.10038	8.27599	12.9348
ZNF806	388	0	0.194687	0.024798	0.01891	0.04256	0.313765	0.080683	0.156339	0.102019	0.091779	0.113346	0.169486	0.106589	0.059384	0.023858	0.020876	0.745967	0.792076	0.681246	1.52577	0.798438	0.630569	0.404471	0.632293	0.82564	0.643905	0.502845	0.434934	0.560698	0.659916	0.147669	0.136744	0.164761	0.335577	0.084684	0.223534	0.125249
CXorf56	389	3.76013	5.03135	3.23265	4.47416	4.31118	5.21487	4.31777	4.03783	3.31261	3.85654	3.98065	5.47727	3.99918	4.00717	3.97809	4.7486	4.92797	4.1129	3.91784	4.41805	4.8671	4.06411	5.12125	4.47471	4.7605	3.63806	5.18022	3.78609	4.40039	4.64381	5.3632	4.77655	3.90212	4.99633	5.37915	4.47225	5.44553
ATP1A2	390	6.98012	12.8563	22.7701	14.9686	31.7189	39.0948	20.5888	2.17377	29.4904	10.8192	43.8379	15.0663	16.9916	47.0598	12.8732	11.707	32.2079	54.515	41.8673	4.86685	58.9277	32.5968	40.1913	34.1459	23.9379	67.406	20.4456	42.3029	53.7153	27.705	59.735	6.80748	50.587	15.5417	9.69044	8.27349	18.1473
TTC27	391	8.77088	7.17484	7.82759	8.24749	6.78867	4.07206	8.03714	4.72962	9.33711	8.45639	7.10425	6.75724	6.08324	7.38988	7.63226	8.02371	7.77985	7.33598	7.83672	5.12101	5.60712	6.20869	7.14962	6.95169	7.29235	7.86861	7.61309	8.28525	7.49097	8.38778	7.40216	5.58852	6.86785	6.15021	5.68423	6.9861	6.60456
ZNF582	392	1.35392	1.54651	1.13897	1.26719	1.09149	0.933516	1.08733	0.742817	1.48325	1.38844	1.36967	1.0249	1.17767	1.27728	1.12263	1.14697	0.704392	0.745756	0.728722	0.674371	0.896133	0.670845	0.835488	0.980499	1.00572	0.895012	1.12753	0.792917	0.632951	0.873548	1.67888	1.14008	2.29983	1.2394	1.60993	1.72196	1.71483
VSIG2	393	0.001357	0.099399	0.233807	0.035974	0.12571	0.29199	0.122959	0	0.080441	0	0	0.218282	0.122936	0.101235	0.032541	0.090575	0.046598	0.084334	0.099499	0.120048	0.142872	0.04441	0.087328	0.144218	0.210034	0.087513	0.107284	0.146986	0.158098	0.057168	0.093278	0.891884	0.063091	0.021516	0.106739	0.010099	0.208045
PHLDB1	394	3.64885	4.61151	4.02469	3.6434	4.14932	7.65004	4.4038	3.13248	2.98982	2.11887	2.40478	4.20095	3.67073	5.14921	2.96791	4.28832	5.37817	4.98418	4.47818	4.64278	7.27032	4.46774	5.18093	4.57193	4.3959	5.73438	5.45984	5.02433	6.32261	4.9909	4.21042	4.05391	4.49835	5.51211	6.18518	3.49858	1.76184
MARCO	395	0.41045	0.12155	0.040892	0.016024	0.787831	0.439501	0	0	0.085283	0.06987	0.551833	0.018756	0.032463	0.123965	0.175924	0.139608	0.116543	0.038845	0	0.020385	0.610682	0	0.071863	0	0.116131	0.071867	0.458369	0	0.09049	0.362553	0	0.020129	0	0.133892	0.036128	0.017094	0
CYP24A1	396	0.018136	0.009193	0.021972	0	0.028475	0.148427	0	0.009011	0.056419	0	0.169157	0	0	0.413978	0	0.009311	0.010293	0	0.035939	0.010877	0.117204	0.011369	0.009488	0.021717	0.012393	0.11711	0.050526	0.010618	0.009604	0.029961	0	0.020904	0.099648	0.039389	0.047931	0.035991	0.022468
PRDM11	397	0.624348	0.624456	0.553691	0.49658	1.0354	0.965084	0.609181	0.561272	0.594882	0.334794	1.04194	0.821612	0.796342	1.19939	0.509819	0.751319	1.09331	0.804939	1.03301	1.08862	1.74249	0.959308	1.14595	0.788087	1.27466	1.43178	0.754977	0.893679	0.802673	0.869237	0.552765	0.750998	0.654505	1.10675	0.578634	0.444373	0.653661
SYT13	398	19.8205	21.9624	59.7182	17.2661	53.6566	67.9785	19.5116	96.1491	13.4933	15.1248	21.9246	21.1906	65.4685	23.3453	24.2241	23.0661	19.3673	15.2005	45.3035	190.733	85.9795	15.5986	6.74607	30.9816	59.9244	39.0907	30.6222	11.8678	11.731	47.727	25.1635	30.8853	27.7767	76.0885	51.5589	31.521	129.372
SNAI2	399	2.667	3.09323	3.69324	2.744	4.49444	1.88636	1.87692	0.998804	2.22853	3.73044	12.5164	2.39339	2.00576	6.80919	3.38121	2.57578	0.931137	1.14682	1.66881	0.473904	2.36551	3.5913	0.891839	2.87386	1.87784	2.90228	2.30973	1.40413	1.93725	2.08438	1.79722	12.2334	1.19803	2.04882	2.78477	2.04403	1.97235
CD74	400	0.731397	0.964749	1.0018	1.18274	1.43969	2.51072	0.995219	0.35627	0.916192	0.902861	2.59783	0.634483	0.864251	1.886	0.888911	0.866275	0.471707	1.0227	0.535641	0.822433	2.45154	0.509845	0.427456	0.734952	0.877261	1.41478	0.754016	0.81665	1.19285	1.07956	1.21077	0.461045	0.792519	0.896615	2.17448	0.938172	0.599497
HGF	401	0.577378	0.772671	0.137938	0	0.668049	0.014249	0.17032	0	0.192616	0.515198	0.528779	0.057931	0.294714	0.017084	0.91693	0.889788	0.680989	0.795891	0.047943	0.009586	0.057628	0.08139	0.422174	0.043259	0.870294	0.704872	0.985404	0.018715	0.335832	0.612428	0.237404	0.037797	0.022165	0.031528	0.18862	0.187813	0.011121
ZRANB1	402	18.0505	20.3453	17.69	17.4238	19.984	15.846	19.1914	16.6937	15.8643	16.0138	12.9339	17.8342	19.6811	16.032	16.1571	18.406	18.5514	18.3347	18.8911	20.0158	18.0951	14.3203	19.6318	17.1627	25.8831	19.4834	22.3175	15.7057	16.9332	22.9064	15.345	19.6346	17.6735	19.4336	16.9583	19.8901	17.9354
NCDN	403	7.2686	11.1168	19.8619	7.62265	16.05	23.9264	6.74139	11.3584	7.2099	6.63719	8.84815	11.1581	18.701	6.76411	9.67292	10.3204	10.9788	12.8273	13.8657	22.122	25.2593	9.52003	6.86933	13.5768	12.6492	11.4276	9.95074	6.04388	15.0387	10.9415	17.3098	39.1529	16.4145	33.5261	30.232	26.5167	15.8775
GPR124	404	4.16948	5.01133	4.47357	2.93817	9.36016	5.15594	3.01603	2.74643	3.09096	3.90905	10.7929	2.75501	3.45392	6.69774	3.6921	5.14269	2.79626	3.39565	3.02603	2.22515	6.50669	2.10963	2.48696	2.77431	4.68584	6.27089	6.32336	2.44564	5.75343	5.18736	4.16873	2.91595	3.15167	5.40572	6.22735	4.72062	2.82448
CCT8L1P	405	0.021569	0	0	0	0	0.02529	0	0.048801	0	0.039976	0	0	0.020459	0	0	0	0.024483	0.031429	0	0	0	0.027411	0	0	0.029476	0	0.0241	0.020818	0	0	0.026712	0	0	0.112425	0.022925	0.021401	0
ZFP64	406	4.66237	4.97745	4.27695	4.46938	3.87049	4.43745	4.55548	4.35945	4.04749	3.4095	3.01165	4.54134	3.94146	4.47127	4.02195	4.76288	4.91674	5.28645	5.17392	5.55917	5.3364	4.02322	5.38934	4.2514	4.66635	5.09861	5.68341	5.00559	6.0109	5.00755	4.83799	4.90098	4.67971	4.44467	4.88362	4.78159	3.32597
MNAT1	407	5.16262	4.40815	2.81586	3.43462	3.12473	1.80584	3.63468	2.35339	4.74836	4.58124	3.62814	3.56103	2.87579	3.80329	3.87984	4.07106	5.18669	4.39208	3.49196	1.23452	1.65251	3.41789	4.60305	2.7544	4.11253	4.2063	5.61316	3.61482	3.5585	4.30238	2.89984	2.02426	2.69243	1.77894	2.21802	1.62805	2.14522
SAMD4A	408	0.911429	1.75338	1.78786	2.45116	2.58131	1.14869	2.80873	0.230674	0.315622	0.390865	1.28677	2.48491	1.89893	0.540346	1.26126	1.8019	2.51237	2.27147	2.58578	0.34976	1.63895	2.80304	3.66731	3.4702	2.89315	1.68566	2.29871	2.72005	2.5244	2.82963	1.60039	1.49835	2.38475	0.390729	2.37238	0.860279	0.415057
RUNX3	409	0.046114	0.031237	0.018791	0.07155	0	0.081167	0.022697	0.034858	0.019327	0.010461	0.169758	0.042505	0.007307	0.016244	0.009984	0.007803	0.017488	0.038164	0.010176	0.036459	0.109839	0.019579	0.0403	0.046119	0.052636	0.04875	0.008607	0.00902	0.065265	0.008484	0.00954	0.027	0.025314	0.020076	0.008187	0.038216	0.009414
MRE11A	410	5.91296	5.46652	2.73688	4.9039	2.89178	1.28639	4.85488	2.20972	5.83761	4.52496	3.44981	3.95821	2.50373	4.97032	3.89127	4.54926	5.22075	4.55594	3.96355	1.55297	1.56792	4.12647	5.16087	4.91977	3.93626	4.46915	6.10289	5.84003	4.61513	4.49458	2.07034	0.903683	2.75124	1.24664	1.64083	1.16259	0.960038
PLEKHB1	411	2.42319	2.99361	0.903395	1.93568	1.35504	2.79244	1.29323	4.14107	5.58467	4.75068	6.66033	2.3627	1.28848	4.16095	3.32407	2.65362	4.97076	5.47028	1.75155	4.77706	2.22506	1.90385	5.39583	1.93682	1.65174	3.45472	2.15659	1.93313	4.88916	2.10984	3.69988	0.926699	2.64337	0.152092	0.1929	1.09074	5.18049
SERPINB1	412	1.30028	1.28851	1.12599	1.04602	1.79081	0.72834	0.767361	1.10821	1.82942	2.47154	3.41812	1.08072	0.784622	2.93055	1.09989	0.902798	0.896613	1.24806	0.425449	0.43951	1.03318	0.805906	0.825232	0.812104	0.634815	1.25813	0.70757	0.693584	1.04801	1.15164	0.785735	0.329374	0.60131	0.533205	0.64996	0.564825	0.412611
CYP3A43	413	0	0	0	0.012533	0	0	0	0	0	0	0	0	0	0	0	0.014025	0.015295	0	0	0	0	0	0.014292	0	0	0	0.012581	0	0	0	0	0	0	0	0.001962	0.026739	0
SLC7A9	414	0.12089	0.122278	0.024353	0.13152	0.125103	0.385798	0.118467	0.022588	0.050438	0.027484	0.026258	0.244488	0.095733	0.064021	0.07799	0.041564	0.555726	0.22383	0.185717	0.242438	0.106068	0.442131	0.416395	0.511231	0.220903	0.061876	0.208121	0.25108	0.296617	0.362668	0.110425	0.179272	0.111053	0.366387	0.334893	0.146274	0.049807
SPAST	415	28.0478	28.2603	22.4833	27.4141	32.2816	26.9422	30.1927	28.4655	26.6422	25.7525	22.4887	26.6399	34.2969	25.6585	32.914	26.2216	15.7373	16.3507	22.8302	23.658	21.121	20.6236	18.5281	22.0524	27.8692	21.1109	21.821	21.7153	14.8913	24.064	29.2024	23.5926	24.1649	30.5513	30.5363	32.4805	39.5039
NRXN3	416	0.215675	0.834591	7.392	5.87828	2.05088	9.26686	5.47948	0.751343	0.677992	0.118871	1.52143	8.95663	5.98975	0.253523	0.784006	0.557835	0.747704	1.36634	10.2104	3.41132	14.0275	10.4225	0.807953	12.9967	1.76712	1.29754	0.659965	9.99747	0.974656	1.23353	0.837609	16.2494	4.86733	1.1146	0.543602	1.12403	3.9508
OSBPL5	417	3.3005	4.5963	3.54722	2.83333	5.19668	6.14323	3.72931	3.35524	2.56657	2.56437	2.62992	4.24033	3.66456	3.10821	3.0526	4.71775	4.22642	4.50598	3.59716	4.02676	5.23229	3.27232	4.21194	3.00715	4.28948	4.0835	4.66762	2.75931	5.27501	4.46367	4.48612	4.99078	3.32788	8.31142	7.32665	5.4697	1.73045
AQR	418	6.7819	6.86668	5.45747	6.02213	5.54248	3.09107	7.13613	4.09094	5.70135	4.71288	3.70149	5.57523	6.12191	5.98271	5.57679	6.61498	7.33008	7.03793	7.65398	4.94199	4.30089	6.16018	7.94566	6.97191	6.92984	8.32721	8.24774	8.72856	7.02339	7.21274	4.45211	4.2652	5.44223	3.54423	4.01749	4.72986	2.48559
CPS1	419	0.198177	0.204725	0.142106	0.16261	0.36764	0.13639	0.06409	0.615769	0.132504	0.125621	0.430583	0.07196	0.129352	0.429383	0.168188	0.193365	0.096823	0.147444	0.10359	0.291038	0.305186	0.060939	0.160253	0.110603	0.177779	0.324702	0.247631	0.083867	0.133093	0.286125	0.101434	0.023964	0.060185	0.113052	0.116269	0.114816	0.029615
C8B	420	0	0	0	0	0	0	0	0	0	0	0	0	0	0	0	0	0.01495	0	0	0	0.015456	0.016512	0	0	0	0	0	0	0.01376	0.014309	0	0	0	0	0	0	0.016316
FHL1	421	46.74	29.637	44.3069	36.3244	25.9175	33.771	26.0559	28.5109	40.7793	28.7529	17.3463	29.0852	37.6947	82.2327	23.4018	31.3145	28.5171	28.1752	39.2439	45.0926	51.5771	26.0159	28.0565	37.107	28.6914	83.3511	39.0755	28.5551	50.6685	30.4749	52.0909	52.801	41.3953	30.1395	29.4007	23.0683	35.0838
C20orf43	422	38.2903	28.5048	32.8565	32.9054	30.0089	24.3321	32.7831	26.9983	36.2211	41.4636	37.6941	30.5797	30.0697	33.9598	35.4606	32.9024	25.8547	24.2369	26.645	18.9273	20.3291	20.5619	21.8279	18.7857	21.658	27.476	22.8398	27.9243	25.7248	23.3191	28.3054	21.8303	31.3124	18.1804	21.3929	19.9874	19.1229
GABRA1	423	0.085268	0.099562	1.70536	0.973389	1.45184	1.69956	0.308616	0.762189	0.17224	0.142271	0.839338	1.76032	3.50176	0.138036	0.339713	0.066894	0.007445	0.237633	1.60606	2.58881	4.05812	1.94581	0.027452	4.13205	0.393316	0.248873	0.131625	0.382349	0.048532	0.086489	0.42976	4.72307	1.64079	0.295686	0.027886	0.155755	20.6368
NLRP2	424	0.975979	0.855243	0.882161	0.698907	1.00348	0.869301	0.642198	0.62484	0.513253	0.469963	0.508741	1.10331	1.05952	0.958303	0.612581	0.786847	0.559271	0.777937	0.370405	0.389444	0.378695	0.514686	1.24475	0.310222	0.683562	0.679398	0.788657	0.326041	0.818853	0.838518	4.21734	4.96824	3.04642	4.7047	7.67385	6.22328	2.14921
SLC45A4	425	0.975853	1.34737	1.06265	0.799477	1.46578	2.27124	0.987281	0.670878	0.835324	0.722821	0.657564	1.34945	1.03647	1.47039	0.909966	1.46009	0.955046	0.907986	0.591892	0.878047	1.68335	0.664504	0.799506	0.641979	1.00451	1.09768	1.13433	0.484892	1.37081	1.07735	0.933742	2.06957	0.95299	1.92535	2.099	2.36226	0.539746
RNF10	426	24.9867	32.474	33.1166	31.3885	32.9914	39.6608	30.3047	28.0025	22.247	21.3619	25.3054	33.7192	32.355	27.9441	26.227	30.8246	34.0402	31.8739	32.7617	38.5729	41.6615	29.9621	29.956	31.444	33.5609	30.0253	32.7541	30.3411	31.9178	35.3388	26.9808	39.8085	28.3179	33.8948	36.395	33.7176	19.1611
ZNF839	427	2.1127	2.49912	2.06927	1.88398	2.1348	2.82945	1.59896	1.74205	2.01531	1.81049	1.7376	2.529	2.32467	2.17664	1.69318	2.11489	2.54522	2.56405	1.51098	1.68565	2.12028	1.67886	2.43874	1.91642	2.20042	1.82798	2.76086	1.56101	2.33499	2.15195	2.51254	3.89297	2.42094	3.12939	3.42275	2.76765	1.8747
ZDHHC6	428	16.8034	13.5845	11.1858	11.7227	11.7523	9.40931	12.3813	7.39452	16.9878	18.171	14.3736	12.2461	10.5361	14.8194	14.5519	13.0239	10.2501	10.2365	8.62649	5.01025	7.79402	8.66105	10.2518	8.30527	7.9732	9.39746	10.3784	9.4659	8.84125	10.091	14.1825	8.96412	12.5938	9.85915	9.80387	9.83344	9.50585
GRAMD1B	429	2.46657	3.667	6.23308	2.80971	5.57927	6.20984	3.93908	3.42612	1.65776	1.40962	1.63821	3.67291	6.90839	2.13631	2.08961	3.75355	4.14088	4.08722	7.77195	7.40477	8.54961	4.22824	4.27859	5.71978	9.41472	6.78234	6.42889	4.15633	4.09661	7.37642	6.51056	7.45336	7.7295	8.02083	8.34049	7.96298	4.99139
RNH1	430	12.2078	10.174	9.04112	10.239	10.3525	8.78195	9.42534	6.69102	11.8529	14.0359	12.9553	8.71743	8.07877	11.8485	11.1834	10.7941	9.39383	10.2331	8.22414	7.32442	9.09885	7.36939	9.36369	6.4458	5.8087	10.0421	8.06881	10.2562	12.1559	7.11156	11.4817	10.9166	11.3625	8.5197	9.70251	10.5543	6.07917
NDUFS1	431	16.2539	17.486	13.0207	14.2896	14.3546	10.7004	15.5306	9.43835	12.1978	13.1598	11.2446	15.6433	13.768	13.6585	13.4119	16.5855	17.3248	15.613	14.4895	12.0839	11.4535	14.6088	18.0542	15.1998	16.972	15.8832	16.1507	16.2831	15.7805	16.2084	12.3281	8.79857	12.2865	12.4801	11.7253	14.073	8.50215
RB1CC1	432	18.4591	20.3353	16.3789	16.2279	19.4061	14.2542	18.4523	14.8636	18.244	16.4694	13.5095	17.5841	20.3364	15.0619	21.3048	18.1587	14.5222	15.1636	16.8326	14.2515	14.103	15.6076	14.6067	15.4785	21.2298	16.6789	18.1095	14.3525	13.9706	18.9808	24.538	17.0068	19.0247	23.2039	24.0034	23.857	27.8532
ERP44	433	7.51598	8.3737	7.78569	8.32272	8.58051	6.38335	8.82625	6.89087	8.32494	8.02663	9.27688	7.57966	7.86909	8.57615	7.89809	7.38717	7.07773	7.24028	8.42493	6.4237	6.66646	7.56429	7.0886	7.67082	8.86947	8.01309	8.68869	7.64767	7.27879	8.96966	8.4003	6.2942	6.93626	7.12201	7.86778	9.22546	8.44162
ALAS1	434	16.1556	18.6228	24.5639	17.0096	22.0087	24.0413	16.2054	19.8577	16.202	16.3276	16.1254	18.5084	20.5153	15.203	18.8308	18.7299	17.8782	18.2484	16.4296	20.6913	22.1703	14.447	14.5177	15.7376	19.1127	17.9491	15.9718	14.4161	19.0889	18.6047	18.0223	25.5619	18.6181	24.768	26.1809	27.6488	15.4576
BIRC3	435	0.033672	0.050642	0.042421	0.031319	0.130887	0.030852	0.014201	0.010905	0.012092	0.026179	0.492444	0.015956	0.027307	0.055624	0.043559	0.029626	0.092559	0.059953	0.038115	0.005781	0.056946	0.054959	0.115783	0.046012	0.076902	0.04076	0.123644	0.063297	0.081669	0.09547	0.029764	0.112393	0.06364	0.179755	0.050811	0.034896	0.173872
AKAP11	436	9.09046	11.5962	13.7565	11.1497	13.3164	9.39607	11.0248	8.37285	9.15262	7.83382	8.23297	11.8232	15.56	7.80515	11.8527	10.2483	11.4852	11.6155	16.7966	17.1341	15.2054	16.4954	12.6445	18.3333	17.5034	13.324	12.8008	12.8958	10.7155	14.7316	13.5668	16.1759	11.9512	17.9787	14.5638	23.1763	29.8164
GLRX2	437	2.48897	1.71671	1.52935	3.13927	2.25328	2.06106	3.27271	1.65694	3.5531	2.99455	3.68179	1.97704	1.92592	2.36813	3.67247	1.96328	1.99868	1.75634	2.12874	1.09619	1.47286	1.90035	2.32892	2.51186	1.35742	1.74544	1.32112	2.65618	1.99525	2.29296	2.82608	0.931727	2.77751	1.93653	0.935549	1.08473	2.377
SNAPC1	438	5.88855	3.99975	3.64035	4.73233	2.90139	1.91702	5.19167	4.8198	5.61389	5.79266	7.09338	3.83834	2.66396	5.91491	4.48431	4.32307	4.74207	6.09368	4.36782	2.37268	2.59365	4.41781	5.24593	4.3044	4.45139	5.91418	5.43286	4.84684	5.05009	3.69738	4.88442	2.24762	3.67685	1.6378	2.47562	2.63757	4.00154
DERA	439	11.3194	9.0347	7.58418	14.0168	10.3208	3.21765	13.6742	8.37869	13.607	16.3815	12.4568	11.6636	7.8007	13.9483	15.285	9.83483	9.79543	9.61983	8.48037	2.2417	2.78981	8.8462	8.183	8.59709	6.99622	6.99347	5.77653	12.8686	7.53592	8.12469	6.16986	1.42244	12.4397	2.70228	1.37288	2.79917	1.77447
STRAP	440	74.6914	65.2324	59.3601	68.5061	63.6232	55.6626	64.5193	77.7828	82.7316	89.805	78.8011	63.5843	65.3259	75.5865	84.4829	65.885	46.9197	47.8325	48.9455	53.4285	45.481	42.3996	41.5703	43.8615	49.7709	54.224	48.0273	48.2403	45.3384	48.4891	67.1988	43.3075	55.8725	43.7828	43.949	42.2044	82.8415
ABCC2	441	0.028837	0.069136	0.055803	0.042625	0.030184	0.033722	0.016994	0.038884	0.035785	0.031222	0.014965	0.057112	0.032603	0.01208	0.092028	0.02953	0.062371	0.110315	0.022755	0.013742	0.013722	0.109845	0.139126	0.081753	0.108749	0.065832	0.145175	0.106501	0.054231	0.06927	0.007143	0.026499	0.018524	0.029859	0.024272	0.033795	0.023848
DEF6	442	0.29318	0.406651	0.293426	0.153219	0.867817	0.610947	0.183713	0.181026	0.218263	0.218526	0.572423	0.294316	0.341775	0.532167	0.312512	0.384867	0.171339	0.212719	0.140926	0.128173	0.618324	0.084847	0.140285	0.176181	0.274217	0.35213	0.268603	0.140418	0.397156	0.382427	0.386683	0.139688	0.249141	0.512386	0.725239	0.29162	0.082483
PLEKHO1	443	20.3869	19.2652	21.0851	19.9158	19.2013	24.2918	23.5772	16.2205	19.7177	21.8631	20.175	21.288	18.312	15.129	22.7111	20.2792	17.9997	16.3196	16.1948	11.927	15.3736	15.9055	14.8266	11.7956	11.5501	11.8874	13.0604	18.8416	14.9592	13.1128	15.922	21.5776	23.6479	19.2806	16.31	15.7794	12.4333
GCLM	444	1.99511	2.27153	1.76897	2.39683	2.22965	1.05278	2.39531	1.33142	1.75771	1.87989	2.41726	2.12848	2.15511	2.44736	2.06742	1.67015	1.42446	1.72585	2.08429	0.630637	0.821626	2.08313	1.76315	2.20509	1.1979	1.48351	1.71764	2.25497	1.16534	1.38225	1.94881	1.17283	2.01748	1.70028	1.25987	1.43695	2.36875
UBR2	445	3.98213	5.36069	4.1668	4.4905	4.7481	3.68761	4.45145	3.26548	3.84424	2.94153	3.28292	4.72259	4.29079	3.57823	4.02442	4.90371	4.31646	4.31389	3.58373	2.40683	2.96175	4.04564	4.666	4.03063	4.14719	4.63884	5.19392	3.57752	4.33757	4.4483	3.82142	3.81319	3.89489	4.94039	5.05639	5.44848	3.09426
EHD2	446	1.63934	1.96172	2.10594	1.13814	5.82267	2.1767	1.09624	0.647212	0.990991	1.19407	3.5603	0.741465	1.21698	2.78956	1.70133	2.41226	1.35534	1.66909	1.24402	1.0052	4.24019	0.978621	1.3318	1.53609	2.45283	3.23378	3.52444	1.50288	2.70664	3.02114	1.77898	0.726004	1.32443	2.56413	2.07592	1.80221	0.599672
DEPDC1	447	6.75835	4.86953	2.10482	6.33921	2.68218	0.750486	6.20402	2.96276	5.93999	6.40995	4.07278	4.63016	2.80592	5.43456	4.94718	4.77935	3.73308	4.31052	4.43737	1.03211	0.609142	5.92159	5.09678	6.02102	3.27914	3.88942	4.84529	7.57269	3.615	3.09527	3.57155	0.551801	4.57972	0.169693	0.220686	0.108903	0.566976
CCDC28A	448	8.80467	5.89933	3.59232	3.98854	3.6968	3.27726	4.44008	2.67442	8.54586	8.14588	6.2377	3.04543	3.14273	6.6086	5.08418	6.11501	7.38615	7.59343	4.16857	1.42265	3.44944	4.38441	7.72953	3.76287	6.11003	8.2461	9.22039	3.81623	8.54823	6.63503	5.35711	2.25923	4.28087	2.81837	3.2672	2.34918	1.86997
RRAGD	449	13.8719	11.415	6.0159	8.42952	9.17436	8.6119	6.64637	6.57754	17.803	11.2454	7.49713	7.78111	8.01656	12.7986	9.00272	10.5832	14.4895	15.3114	8.40278	10.252	11.7651	8.75681	16.0353	11.8273	16.5778	17.1366	16.9769	7.67514	15.0062	15.3132	8.58761	9.60949	6.67187	8.62802	6.00903	10.0756	18.7248
HSF2	450	18.0234	16.5131	19.1432	18.823	17.1382	12.6182	20.1079	14.3382	16.4166	18.8849	16.404	17.208	20.3555	15.2999	18.0081	16.0584	18.8517	19.3132	21.5276	12.9179	14.8701	20.2828	17.6456	19.4478	19.6079	18.7701	19.0578	21.75	18.1132	18.7467	25.0698	16.1837	23.6167	17.3001	15.9584	15.9057	25.0742
PHF20	451	10.8309	12.7678	12.8346	12.3294	13.3675	9.20145	13.1707	11.6204	9.91229	8.28743	8.06472	12.0532	11.445	10.2058	11.195	12.0163	16.0883	14.2994	16.8183	14.7836	14.7268	14.0146	16.2134	14.1732	18.5455	15.0811	17.8646	17.2006	13.6623	19.2512	13.3854	13.1241	13.266	16.2387	16.2835	16.9094	13.4115
HSD17B6	452	1.44194	1.51605	1.01161	1.60812	0.923664	1.01288	1.56802	1.05959	3.95721	2.20457	1.45198	1.12291	0.941631	1.98953	1.11493	1.02369	1.32919	1.31381	1.13269	0.721656	0.671668	1.24252	1.49242	1.02182	0.888911	1.29718	0.882249	1.10797	1.64999	0.913884	0.919532	0.640429	0.821477	0.495897	0.44543	0.519455	0.601355
NR1H3	453	1.93547	1.91056	1.66385	1.61646	1.88639	2.42103	1.40936	2.03026	2.69934	2.54263	3.13189	1.76139	1.36315	2.56021	2.03313	1.89059	1.66341	1.97631	1.17104	1.17454	1.23592	1.39055	1.3992	1.1288	1.02277	1.91259	1.79794	1.58048	2.34934	1.53072	1.74949	1.21008	1.79313	1.19703	1.44859	1.33739	1.29206
TYMP	454	0.134896	0.20833	0.18441	0.201787	0.199732	0.651099	0.206451	0.178182	0.190035	0.247368	0.350209	0.203135	0.250208	0.316037	0.192917	0.12555	0.107802	0.224922	0.105488	0.185396	0.497829	0.289516	0.176934	0.176643	0.156669	0.2309	0.229786	0.202468	0.208002	0.305534	0.375756	0.337684	0.283626	0.182478	0.314372	0.128604	0.180204
NCAPH2	455	31.5995	20.943	20.4275	26.2868	18.2004	16.4266	25.86	17.8799	27.3593	32.138	21.1652	23.5731	18.3778	22.1737	24.4123	23.9532	20.9922	21.0327	18.5796	11.5272	12.9302	20.4494	21.5747	17.3545	11.3338	15.7045	15.6852	24.5486	20.11	12.3713	16.489	17.9529	27.1553	14.2668	12.8892	10.1291	9.95576
TOMM34	456	8.19928	7.38334	6.42914	8.39351	6.36843	4.69354	7.34164	4.29278	8.24938	6.93668	8.44645	6.08749	5.93816	11.3894	5.83299	7.66651	9.10194	10.537	8.2017	5.77638	6.37613	6.96642	8.97949	8.22469	6.9754	14.2363	8.30799	9.85932	11.5118	7.13973	12.3135	7.49031	9.59656	6.33215	5.81384	7.17092	4.58615
SEC63	457	8.37178	12.2302	9.43532	11.3764	11.3124	11.0119	12.0857	11.4	9.98052	8.00529	8.45245	12.7253	10.3785	10.0601	9.61392	10.7833	8.57807	8.99539	10.6623	8.51257	9.16747	9.15032	9.72247	10.4307	13.3459	9.7456	12.9749	8.80521	8.67979	12.775	8.6661	9.58219	8.91687	10.1753	9.93551	11.0565	7.8609
KPNA6	458	12.0885	13.7626	13.7377	12.9782	13.9091	11.0315	13.96	8.70172	9.89894	8.24913	6.92579	12.28	13.5361	11.603	9.12201	10.9939	17.5656	16.0844	15.4484	11.4873	13.997	12.6725	18.3854	13.6405	18.3413	17.863	18.122	15.0912	16.2521	16.7992	9.91321	12.6662	10.9381	13.4218	13.9742	13.4608	6.23811
VIM	459	646.979	558.445	390.318	439.456	528.127	275.283	528.416	234.41	811.288	620.188	750.908	415.125	375.631	807.344	512.893	564.394	625.634	668.094	432.685	161.362	314.605	470.788	720.955	325.808	360.295	740.515	539.611	609.179	697.723	448.286	497.414	75.3418	382.483	116.273	57.5462	57.0878	81.5786
RTEL1	460	1.9171	2.66621	1.27156	1.61152	1.63184	2.13684	1.86653	1.05475	1.53093	1.33267	1.04375	2.52003	1.32567	1.45142	1.45504	2.05789	3.89773	3.5429	1.7388	1.43186	1.72933	3.28255	4.00228	3.00768	2.0028	2.02967	3.23428	2.34567	3.6594	2.27222	1.16203	2.25321	1.54168	2.12943	2.41604	1.74582	0.572596
FAS	461	0.044762	0.066601	0.078653	0.046016	0.083066	0.046566	0.106903	0.039369	0.068482	0.05393	0.135008	0.05497	0.047121	0.151099	0.051649	0.066075	0.045232	0.106427	0.091234	0.053691	0.145173	0.10402	0.098744	0.077537	0.087757	0.132639	0.127636	0.103171	0.10016	0.032692	0.638556	0.040581	0.378854	0.044968	0.049652	0.026515	0.090057
RNASET2	462	0.848201	0.937409	1.58715	1.20537	1.30776	1.72884	1.12106	0.844368	1.17479	1.06771	1.83997	1.09359	1.40224	1.40365	0.946904	0.8818	1.12687	0.882749	1.21835	0.651863	1.30747	1.22769	0.675335	1.53348	0.775796	0.814959	0.777865	0.927587	1.11159	0.97913	0.943127	1.29331	1.6983	0.892761	1.08855	1.12785	0.562329
CD44	463	0.178508	0.195745	0.571087	0.252742	0.198198	0.38568	0.20729	0.068649	0.202188	0.135672	0.501442	0.248359	0.376324	0.87429	0.166968	0.179762	0.299818	0.259123	0.585133	0.145396	0.560377	0.553543	0.453727	0.578793	0.263675	1.44574	0.295567	0.611236	0.494998	0.267371	3.0548	0.521975	0.691643	0.096134	0.102742	0.063813	1.41292
KCNG1	464	4.78947	5.72148	5.78949	1.70601	6.7437	1.87108	5.00142	6.20246	14.783	5.22268	10.0278	4.48925	9.77138	13.5457	4.83448	5.43919	8.44313	14.9069	10.5808	2.71248	2.2991	4.47718	5.13789	2.49663	10.1845	24.4873	9.62859	5.39378	22.2704	9.36083	27.2243	11.802	13.802	13.1747	70.8195	47.2367	3.52068
AGPAT4	465	5.42907	7.78267	6.03168	5.51052	6.88056	6.55308	5.68417	4.95255	4.55033	4.18855	3.95817	6.84527	7.04881	5.4376	5.52426	7.19242	8.82034	8.76077	6.76785	7.10485	7.39327	7.10855	9.30913	7.46565	10.2387	7.4901	10.6199	5.23577	8.28013	9.53543	5.74329	7.1293	5.17753	8.62721	8.04874	8.94016	4.11957
SLAMF7	466	0	0	0	0	0	0	0	0	0	0	0.040256	0	0	0	0	0.008047	0	0.008895	0.010353	0	0	0	0.0082	0	0	0	0	0	0	0	0	0	0	0	0.00833	0	0
BTN3A1	467	0.798305	1.03922	2.98084	2.08565	1.36296	1.42153	1.50791	0.623888	0.982842	0.880142	2.97848	2.27022	2.39269	1.27782	1.41249	0.95378	1.53924	2.09688	3.10415	2.14211	2.3881	2.70154	1.27222	4.9201	1.34099	2.10588	1.25451	2.05954	2.20119	1.47019	3.04773	3.45562	3.13015	1.89559	1.17296	6.49599	1.96201
MIPEP	468	4.12799	3.08583	3.05541	3.73034	2.53625	2.05582	2.76374	3.07301	6.28608	4.1925	4.03644	3.41813	2.78495	5.11937	3.19382	2.68986	2.65318	2.91264	2.70793	2.46997	1.91106	2.92919	2.90288	2.74714	2.10669	3.57047	2.37526	2.99635	3.3266	1.88783	3.76093	3.1915	3.39564	1.86452	2.17282	2.23822	3.03971
PRKCH	469	1.14856	1.34218	2.56934	1.1402	1.60193	0.644015	0.818242	0.485944	1.43961	1.64993	2.0624	1.41626	0.866939	2.07882	1.17651	1.12029	0.604917	0.811667	0.483677	0.465706	1.16069	0.967067	0.471394	0.770094	0.966626	1.38305	1.27665	0.499277	1.44297	1.07973	0.71016	5.40445	0.514315	0.515749	0.790507	1.41874	0.964087
INSRR	470	0.021156	0.014395	0.165173	0.091651	0.431008	0.016538	0	0.047329	0.003706	0.009576	0.064043	0.363778	0.219211	0.022206	0.045578	0.007241	0.02012	0.052461	0.009316	0.026405	0.056343	0.242098	0.012763	0.678391	0.136487	0.060043	0.015653	0.019081	0.017057	0.100755	0.024313	0.432901	0.015415	0.155808	0.007495	0.020897	0.008736
IFNGR1	471	11.7443	9.04795	10.2089	10.4044	10.7277	7.26869	9.94038	10.4153	11.7834	14.7986	13.4836	9.62668	9.52533	12.9333	11.5054	9.21087	8.49726	9.36888	8.82041	6.51011	7.03729	10.2854	8.79875	8.8441	7.94307	10.2764	7.34977	8.38307	8.47897	9.00512	13.8066	7.98552	12.0817	9.23454	9.65955	8.5865	13.293
B4GALT7	472	3.0653	2.69413	2.83159	3.00493	2.97248	3.81591	3.04624	2.68397	2.59684	3.19777	3.59308	2.7359	2.79632	3.52415	2.66381	2.77983	2.49229	2.63531	2.54887	2.62148	3.11974	2.19518	2.25452	2.12358	1.86194	2.9663	1.99242	2.92996	2.62632	1.93615	3.80537	4.08828	4.31032	3.944	3.78013	2.81788	2.37009
SH2D2A	473	0.057322	0.058112	0.087161	0.099788	0.031216	0.049274	0.097195	0.080185	0.125358	0.058381	0.110547	0.141694	0.040597	0.079429	0.018574	0.010738	0.065068	0.097156	0.056539	0.034378	0.131543	0.036424	0.059574	0.083712	0.195315	0.209638	0.095644	0.01678	0.075681	0.065903	0.040772	0.207257	0.094401	0.357503	0.291462	0.28669	0.17705
VRK2	474	6.00781	5.8675	1.96042	3.97502	4.02062	1.98354	4.5373	2.80958	5.17098	6.51286	5.07496	4.01323	2.86943	4.68806	5.18395	5.19975	3.29717	3.85417	2.07277	0.823839	1.63578	3.86009	3.96631	3.44484	4.84563	3.24226	4.37328	2.72221	3.25089	4.77123	3.65209	1.84987	2.58597	3.39026	5.75858	2.11722	3.37319
TNFRSF1B	475	1.87504	1.64254	1.45946	1.04175	3.96176	2.50616	0.804942	0.627485	1.47802	1.61257	3.3855	0.862214	1.24195	4.66565	1.53815	2.089	1.2078	1.60191	0.921768	1.3159	4.00896	0.849139	0.695125	0.959354	2.5839	3.57382	2.57695	0.803572	2.39738	2.95539	1.552	0.869323	0.964115	1.62603	2.50047	1.82921	0.50179
VEZT	476	12.7887	12.4799	13.6479	13.249	13.6469	11.1276	12.0108	12.3063	11.4878	13.1798	12.6073	13.242	14.3523	12.3106	14.0534	11.9786	9.64382	9.35403	10.7393	9.92331	10.2655	9.84294	9.10569	10.2016	12.5884	11.4896	10.6363	9.36037	9.11026	11.1681	11.9215	11.1955	9.47207	11.9205	10.4772	13.2277	13.7825
POU2F2	477	0.137798	1.05735	0.371666	0.533379	0.634785	3.69592	0.46238	11.3335	0.194646	0.070304	0.178976	1.16837	0.615596	1.40703	0.260843	0.598342	1.02104	0.874555	0.534186	14.3102	2.52387	0.894998	0.584638	1.18056	1.34237	1.80775	0.980207	0.479129	0.783535	1.26955	0.341893	1.50348	0.459511	1.4723	2.38362	1.469	0.519931
BRD9	478	5.97468	6.2414	6.23541	5.7426	6.35076	6.25883	6.29594	5.08838	5.11851	5.5678	4.99957	6.32558	5.87084	5.51403	5.44706	6.05535	6.18049	5.50498	4.81742	5.1815	5.84099	5.39228	5.92753	4.91979	5.13272	4.90287	5.39328	5.49614	5.37354	5.45322	4.44473	6.75548	6.4313	5.49688	5.29213	5.05584	3.74928
SNX1	479	7.93237	8.72863	5.40485	6.74985	6.94093	5.65865	7.14073	5.05377	7.50043	7.23884	6.52466	7.83482	5.49256	7.25809	6.70545	8.13995	8.88213	7.54897	5.541	3.3703	4.34883	6.52354	8.82014	6.57888	6.69731	6.61469	8.50534	6.65048	7.60112	6.66143	5.42791	5.20924	6.12606	5.50714	5.55701	5.12472	2.35562
TBPL1	480	13.7241	11.7231	12.9582	14.0731	12.1386	12.3273	12.3652	21.8579	14.1974	18.1634	15.0866	13.1688	13.5407	13.5239	14.516	11.9776	9.901	10.6601	13.4702	15.5149	14.4073	11.4333	8.8037	13.0414	14.1104	11.0181	11.3728	11.8094	10.0862	12.1196	14.5156	14.2034	13.9111	12.0507	10.5486	11.5998	27.363
ARNTL2	481	0.500658	0.798007	1.89926	2.27243	1.31762	3.46864	1.93589	2.26086	1.17721	0.942554	1.21138	2.48718	2.02344	1.51536	1.04082	0.462551	0.407903	0.492435	1.36185	2.0939	1.87767	1.50241	0.337436	1.81515	0.352072	0.468407	0.2081	1.52001	0.442275	0.418466	1.0652	2.53912	1.90089	0.970587	0.418642	0.583516	4.82119
BCLAF1	482	27.2838	32.2785	23.5093	30.7597	30.9761	20.729	31.3444	25.257	27.4636	22.8996	20.6349	30.4556	28.8703	28.3307	29.3156	29.5801	22.9257	22.4631	24.9853	18.3634	18.3084	21.4242	24.2969	25.5196	31.2549	24.0786	30.6915	24.413	20.2308	28.1475	26.8557	20.6371	24.7842	22.0502	23.5655	25.1036	30.0654
SLC39A9	483	16.1328	12.7014	14.1738	14.7523	12.6257	9.67595	14.1586	11.3177	17.819	16.4566	16.1857	10.7186	14.0579	15.9138	13.0211	12.676	10.3575	10.7704	11.9381	9.62973	9.28949	9.70414	11.2573	10.8128	10.226	13.3694	11.3912	12.4636	11.4948	10.7096	11.9132	10.0735	13.0471	9.30933	9.19282	11.4139	11.3044
ANK1	484	0.21814	0.592117	0.504582	0.446108	0.761901	3.14812	0.388221	0.321692	0.277826	0.151224	0.632452	0.783479	0.735174	0.41392	0.360002	0.51089	0.588899	0.541241	0.48852	0.645401	3.69127	0.390489	0.476005	0.607291	0.451591	0.252215	0.391168	0.225601	0.40092	0.780144	0.164286	1.08991	0.349523	0.581084	0.738257	0.900944	0.22182
IBSP	485	0	0	0	0.159368	0	0.040732	0	0	0	0.047173	0	0	0	0	0	0	0	0.319697	0	0	0	0	0.072696	0	0	0	0	0	0.699512	0	0	0	0	0	0	0	0
TFB1M	486	1.98127	2.33269	1.85538	2.59626	1.70769	1.01048	2.20937	1.1364	1.95821	1.70678	2.46552	2.40008	1.5648	1.91625	2.07411	2.04971	2.6813	2.64846	2.46241	1.35601	1.94739	2.30109	2.23023	2.43775	2.54564	2.82311	2.501	2.78814	2.45388	2.81658	1.5995	1.17799	1.24319	2.37507	1.86615	2.61287	0.783358
RABEP1	487	26.8813	31.1645	40.3519	32.0701	36.8294	32.5783	31.1244	36.2758	27.1372	26.9821	30.4157	35.3998	42.128	27.0638	33.4046	29.8057	22.1161	21.4617	32.909	44.1012	37.8219	24.6026	19.6992	28.1155	31.2547	26.3589	25.8543	22.865	20.4691	31.2103	51.0563	43.1356	35.5713	44.4821	42.0931	45.7773	84.8497
HMGB3	488	63.69	67.6768	59.08	73.1682	51.5253	58.7379	70.2997	60.0117	71.7691	65.266	45.5179	73.2287	54.4304	52.5789	62.1036	59.7018	41.1212	39.0907	45.3087	41.2591	42.5375	37.4405	38.4494	44.3276	36.6476	32.9071	41.5644	44.1977	35.81	39.121	25.2754	35.4674	45.3772	19.7866	19.0106	22.8907	31.2707
NUP160	489	16.8967	14.801	11.2959	14.6025	10.9851	7.09215	14.3554	8.31864	14.7218	12.0611	9.10819	11.9035	10.6226	14.4835	11.7087	13.5097	13.4336	12.8945	12.1141	6.84681	6.49182	11.8824	14.6222	11.914	10.9705	15.0026	14.7712	14.7829	14.1619	11.2145	9.25885	7.12413	11.9875	8.58889	8.48565	10.6834	4.7123
BAK1	490	3.20761	2.18272	1.8894	2.23324	1.8704	1.62696	2.12251	1.64581	3.61536	3.77532	4.10545	1.68337	1.9718	3.70799	2.61067	2.72863	2.60231	2.18376	1.92932	1.68015	2.02859	1.88688	2.04203	1.92933	1.80609	2.53273	1.95646	2.18583	2.64094	1.31409	2.89656	1.59083	3.08544	1.87463	2.23926	1.62178	2.6631
MUSK	491	0	0	0.031082	0.008902	0.008931	0	0	0	0	0	0	0	0.016188	0.076108	0.01106	0	0	0	0	0	0	0	0.008928	0.010217	0	0	0	0	0.018074	0	0.010567	0	0	0.009216	0	0.014645	0
IKZF2	492	0.635849	0.822152	0.574652	1.00089	0.610534	0.570292	0.861977	1.03809	1.03279	0.77752	0.683755	0.904848	0.962991	0.864594	0.914033	0.604014	1.03737	1.76288	1.20915	0.878268	0.714394	1.35529	0.894118	1.62157	0.88385	1.20172	0.695417	1.12359	1.79956	0.788957	0.864862	1.34665	1.06516	0.522331	0.451941	1.72354	1.54129
GRN	493	18.2194	14.5903	13.0711	13.6088	20.7707	18.1779	12.2653	11.5405	13.124	11.8465	18.9819	10.3558	13.3935	24.6139	11.8143	15.3745	14.0045	14.8047	13.7794	13.4653	21.5494	12.2614	15.0313	11.0987	11.8627	24.8036	17.2195	16.49	22.1614	13.7664	19.6483	11.5696	16.9094	11.7849	17.8829	12.9316	6.99045
FAM13B	494	4.88152	10.2631	7.88518	7.40266	9.4033	12.3812	6.61624	8.57501	5.96814	5.54961	7.55975	10.4481	12.3522	5.94361	8.36559	8.09268	5.14548	4.78907	4.24087	5.88316	5.99657	5.524	5.50582	7.25061	5.90979	3.32354	5.6036	3.93653	3.82548	5.23573	9.28549	14.6802	7.95332	11.8805	10.2616	15.4714	22.678
ARHGAP31	495	1.15919	1.44972	1.26764	0.834775	2.28683	1.47104	0.88176	0.498241	1.57263	0.959921	4.56688	0.891046	1.30187	3.04594	1.17331	1.65619	1.12781	1.6386	1.2422	0.368043	2.41233	0.692874	1.44053	0.666461	1.12501	2.01353	1.49223	1.00029	2.1902	1.41482	1.90686	0.623402	1.82452	1.43964	1.09668	1.18008	0.765319
NR2E3	496	0.011412	0.068463	0.02822	0.064413	0.024217	0.081202	0.011823	0.049519	0	0.015709	0	0.050721	0.03292	0	0.04255	0.094545	0.091741	0.071153	0	0.083254	0.013761	0.117413	0.080477	0.199356	0.083319	0	0.025503	0.039355	0.08543	0.075237	0.014327	0.077991	0.025459	0.077817	0.095374	0.029161	0.057324
CENPQ	497	21.7398	9.23528	7.15801	13.2866	7.51272	2.03554	14.7453	6.10191	23.6201	25.1071	16.5911	8.5793	6.46307	14.4717	15.3297	11.094	6.42513	8.56771	8.12293	1.64426	1.72344	8.28721	6.86861	8.68356	7.18129	11.478	8.51615	12.2052	7.5686	5.80714	11.4062	1.38862	9.89581	0.746692	0.951433	0.569752	4.13051
SARS	498	56.6885	49.1897	56.9114	55.9574	50.3796	45.0168	54.1108	58.1506	48.654	55.366	45.8198	41.6722	51.958	44.1587	51.8597	50.545	43.1101	39.1905	49.7166	37.9828	39.3436	31.6763	38.573	33.5513	43.3235	44.5681	42.5268	44.9157	40.8764	43.4137	45.2697	41.9931	53.6136	43.8795	43.0816	40.8945	20.8091
RANBP3	499	17.6819	24.1582	19.9144	20.2955	21.578	27.0263	22.7345	16.6104	16.1049	13.9948	13.5895	24.0079	18.188	17.1119	16.6359	22.2333	26.1205	24.1267	22.1418	13.9153	20.8675	20.3547	24.7084	17.2049	18.7986	20.0744	22.7119	23.8624	24.5512	19.1121	17.5986	23.7347	20.6063	22.0975	24.3357	19.1403	7.93479
ARID4A	500	4.40475	8.05424	7.28772	5.95171	8.38927	6.19187	6.85221	8.65484	5.13596	4.40953	5.53899	8.03244	7.41345	5.34234	7.2436	6.46906	9.49363	9.01636	6.73199	5.5379	6.33059	7.39737	8.95616	7.69369	11.2759	7.11872	10.6376	5.00571	7.08404	9.65728	9.3558	8.86163	6.59076	11.1582	11.2319	10.8767	12.8078
TSSC1	501	7.18689	5.26565	9.32135	7.26401	6.54624	7.24891	6.56538	5.8136	6.61853	7.71627	7.16498	6.12956	8.75751	5.78674	5.75556	5.92903	6.70173	6.55635	9.94844	7.42875	9.13968	7.56215	6.3559	6.82078	5.37867	7.37111	5.7605	8.32994	7.11487	6.14606	8.83754	10.412	8.61038	7.18231	7.42039	6.85846	6.37537
PNPLA6	502	9.67202	9.86587	11.0757	9.1126	10.9829	15.6796	9.22082	7.21081	8.98168	7.45126	7.43282	8.77195	10.7096	12.3809	7.53139	9.3134	9.73571	11.2903	10.7874	8.37823	13.9903	8.68397	9.91681	8.95568	8.64017	13.6291	10.3878	10.4528	13.734	9.29772	12.4001	14.7994	11.8687	12.2021	14.6297	12.6139	6.35753
IFT88	503	3.34122	3.79307	2.20479	3.50309	2.2555	1.91164	2.73217	2.49012	4.29588	4.15863	3.63563	3.05231	2.35461	4.19986	3.13192	2.94683	2.56398	2.83181	2.00609	1.64264	1.56247	2.31167	2.65255	2.80912	2.09945	2.57565	2.90786	2.57783	2.37499	2.42055	3.21297	2.55718	2.67295	1.70182	2.17389	2.58189	3.27658
ALG1	504	6.69812	5.4019	4.38535	5.00877	4.84807	4.28606	5.29893	3.65836	5.44627	5.90007	6.19102	3.58158	4.65498	6.50201	5.43741	6.10014	4.81571	4.54484	3.91176	2.43797	3.66646	3.09604	4.39206	2.9861	3.84111	4.82612	4.69649	4.81852	4.55181	4.21121	6.52299	4.84891	6.25747	4.05758	4.48215	4.68114	4.67856
ZCCHC8	505	3.03815	3.65696	2.90379	3.59809	3.17028	2.73505	3.49957	3.26971	2.69284	2.7341	2.61592	3.95366	3.00672	3.0869	2.89809	3.01882	3.92496	4.04698	3.00748	2.50142	2.54103	3.45699	3.9284	3.83181	4.04313	2.56992	4.02671	2.8356	2.91587	3.3572	2.20477	2.9579	2.99793	3.09177	2.8541	2.60866	2.42567
ABCF2	506	14.7166	12.6435	11.446	9.18528	11.528	9.25485	9.26118	7.37622	13.0075	11.2451	9.4151	9.91709	11.0375	13.2975	10.3786	13.3175	10.7513	10.5366	8.37498	7.00809	8.54992	6.88281	9.49346	6.43391	8.93468	13.158	11.0727	8.2913	11.6096	9.66612	13.172	12.4541	11.6578	11.1758	12.8503	12.9914	6.25183
CHPF2	507	4.41397	4.55316	4.68201	4.00764	5.09766	5.71858	3.87609	3.41804	3.79374	3.67306	5.03424	4.36519	4.74036	5.06595	4.38163	4.83176	3.5417	3.33065	3.36019	2.74135	4.60225	2.44017	3.5151	2.65159	3.05165	4.75841	3.77503	3.47656	3.89923	3.74161	4.77907	5.37257	5.29494	5.30091	5.44466	5.03099	2.54132
LRRC7	508	1.86179	3.8929	3.53093	1.8777	4.6679	2.58431	1.57956	1.52515	1.44918	2.05883	1.56988	3.01143	4.45434	1.32302	3.3731	3.32301	4.35468	3.51093	2.82859	2.83896	3.26582	3.64676	3.10889	3.90883	7.12288	3.26979	3.65352	0.944331	3.50303	6.50437	5.8331	5.3682	3.37233	16.4987	10.2691	14.4198	4.47933
FUT8	509	6.52788	8.89484	10.7488	10.2899	10.0903	6.75028	11.9293	5.41923	6.13477	8.54397	12.2791	12.9189	10.922	5.83139	11.5934	8.76819	8.89861	9.13587	11.6351	6.45761	8.89395	12.3538	12.443	8.4397	9.01071	5.46735	6.66201	12.3277	4.62578	9.74477	5.39545	10.0999	10.841	4.53145	3.94574	5.46469	11.8258
UBA6	510	9.20656	9.68808	5.75362	8.49507	7.90894	4.35996	8.67596	6.43831	9.25364	8.54133	7.68446	8.6832	7.89155	8.22402	9.48358	8.42556	7.85606	8.5298	7.36928	4.64128	3.93833	9.74442	9.20677	9.65322	7.42148	8.29602	9.29442	9.16256	7.7038	8.26734	11.4263	4.82885	7.32065	7.15683	7.54844	9.2797	9.97297
GAB2	511	4.2205	10.5399	8.27691	6.50446	11.9226	13.427	6.87026	10.2481	5.48035	4.95645	4.40214	8.96646	7.82077	6.46021	7.60618	8.54235	15.7117	15.1044	12.7995	18.9257	17.9964	10.9575	10.4434	11.4831	17.5984	12.8975	13.9228	9.83127	17.2569	17.8385	8.63229	7.98245	5.4971	17.975	11.819	25.21	5.65854
ATP6V0A1	512	14.1589	20.0737	35.6263	17.9736	31.4692	49.9939	17.449	28.2482	11.787	11.2093	14.0961	23.5652	37.8864	14.3591	17.8886	19.5023	19.7286	22.0277	31.4935	51.5856	60.7683	21.1156	15.905	31.1357	32.3573	22.9389	22.3442	15.9805	22.569	27.7359	23.3768	50.7461	22.5633	42.2258	44.5672	44.5791	23.2255
PIAS1	513	10.2702	11.0573	11.6481	9.53409	10.228	8.38569	11.5162	8.79828	10.8666	7.53667	8.58344	10.1	11.878	11.3936	9.7969	9.5315	14.6399	14.3804	20.0198	11.4896	14.907	13.2392	14.9782	13.2989	16.6041	18.8058	15.8399	17.2009	16.3562	15.4952	7.72108	6.8116	11.0343	6.75071	7.94465	8.76117	3.56093
SLC4A7	514	7.20577	6.24849	2.16856	4.46524	3.60528	2.35739	4.29717	3.43054	5.42202	5.397	2.94934	4.07679	3.7442	4.46921	5.32305	5.77243	5.2383	6.16488	4.23838	2.37295	2.69485	5.55256	6.48987	5.73353	4.79147	5.46281	5.31122	4.55411	6.16312	4.76167	5.06168	1.79549	3.2633	2.78109	2.26704	2.78366	2.53283
APBA2	515	13.9009	19.4285	28.5107	25.4804	21.4404	29.24	21.2925	36.3284	14.1557	13.7613	12.7981	26.3494	26.4903	18.2927	15.8251	18.37	16.1311	17.9864	24.6652	43.1418	29.246	17.7991	12.8262	21.6933	16.074	21.6989	17.0411	19.5506	21.1622	17.9738	29.8601	34.9003	28.3684	26.3854	36.7725	30.3479	18.5816
UHRF1	516	25.2661	24.757	11.9826	21.5232	13.7492	5.8189	27.2139	9.63716	25.8081	13.7079	8.22111	18.6779	10.1205	20.6203	15.5215	21.8554	21.3681	19.9477	16.845	4.17155	4.22306	16.2411	28.0566	12.935	10.53	18.0455	25.0664	29.4006	21.8997	13.9282	4.27353	2.39291	9.92612	0.697448	1.49937	1.0723	0.646635
MAP2K3	517	2.65113	2.88689	3.10333	2.37929	3.03487	4.76316	2.36627	1.79837	2.53261	1.82807	4.71727	2.92758	3.24293	3.40655	2.15928	2.77804	2.49729	2.66889	2.29802	2.48892	3.73147	1.76944	2.09041	1.62599	1.79551	2.90469	2.80175	2.08923	3.58702	2.13509	2.5818	4.42715	2.86659	2.21053	2.95743	3.23463	2.00504
EFCAB1	518	0.371949	0.132158	0.597633	0.5356	0.13645	0.123524	0.627169	0.280715	0.474086	0.39475	1.20535	0.49283	0.487864	1.81963	0.224999	0.171609	0.105384	0.280882	0.661918	0.103808	0.169558	0.730963	0.136316	0.646207	0.186645	0.307839	0.055246	0.710244	0.102948	0.102432	1.0975	0.585807	1.20965	0.11274	0.065756	0.024654	0.984467
TMSB10	519	2227.13	2020.93	4347.2	2872.41	2565.98	3358.06	2517.52	3743.6	2416.61	3708.96	3672.51	2576.6	2632.65	2236.93	3160.37	2153.77	1696.18	1599.35	1783.76	2240.41	2186.17	1644.84	1192.98	1191.41	1320.33	1344.38	1119.07	1621.47	1427.59	1521.26	2741.09	2739.88	2917.65	2371.7	2250.31	2273.89	3940.99
ASTE1	520	4.01803	4.26605	3.99529	3.91254	3.71234	3.922	3.42687	3.30569	3.95237	4.53123	3.51319	4.31195	4.48292	4.01159	3.72527	4.03939	2.68654	2.97144	3.8866	3.43381	3.94441	2.97333	2.73565	2.62309	3.93484	3.39504	3.36119	3.10377	3.0638	3.33055	5.13995	4.78301	5.17797	4.5632	4.6794	4.34774	4.3545
RNF19A	521	6.64278	8.47796	9.82837	9.42097	8.46848	7.95561	9.26361	8.49561	5.42116	6.82212	7.97664	11.2555	9.59668	6.79045	8.78049	7.40421	7.98177	7.81543	10.8531	8.83394	9.86706	12.2283	9.65172	12.4638	10.2583	7.29888	8.84302	9.35483	6.7428	9.59227	7.86896	12.5867	9.24877	9.16158	4.65792	8.32387	13.7689
PEX3	522	5.38923	4.52564	3.85824	4.30732	4.20653	2.95386	4.22796	2.92492	4.8414	5.62216	4.71492	4.17273	4.85624	4.18219	4.49535	4.02243	2.60338	1.83945	2.22816	1.28847	2.04125	2.88687	2.99754	2.31885	2.52964	2.16226	2.73639	2.53469	2.36014	2.78333	5.54712	2.96732	4.25468	4.84212	3.59959	3.59624	5.09827
GABARAPL2	523	136.364	92.0242	144.823	119.076	113.576	96.9109	104.192	129.639	106.421	159.125	133.123	103.622	144.119	103.319	133.822	108.204	87.788	85.3493	111.546	123.574	116.673	92.9253	79.9234	93.2261	87.128	100.529	84.0166	99.6742	83.4968	93.3316	177.581	136.853	143.15	125.98	124.106	106.893	225.052
MYOC	524	0.016945	0.068715	0.040779	0	0.035473	0.019869	0	0	0	0	0.043969	0.018701	0.032148	0.053601	0.021963	0.0174	0	0.019234	0	0.020325	0.020158	0	0.017731	0.040581	0.023158	0.071413	0	0	0.035893	0.074649	0	0	0	0.044163	0.018011	0	0
SH3YL1	525	1.68182	2.11558	1.80076	1.87716	1.59658	2.41854	1.85523	1.45398	1.92509	1.77247	2.00416	2.26098	1.7834	1.8312	1.68004	1.52366	2.48117	2.67748	2.08784	2.05985	2.77766	2.70734	2.53584	3.03318	2.82449	1.97144	2.48008	1.87125	2.32623	2.64835	1.84597	2.64428	1.60921	2.57945	2.26271	2.21355	1.92161
FAM136A	526	13.6953	10.4467	11.3832	15.3237	9.56018	7.59433	12.336	10.2411	16.8319	16.2009	14.767	14.2237	10.1306	13.9854	13.0526	10.3756	9.34432	8.7742	8.04874	5.94846	5.70559	8.51181	8.70852	8.22726	6.41052	8.56815	7.79004	9.13574	8.38569	7.92114	11.9206	13.1551	12.4698	7.58934	6.85337	8.24225	14.0135
VCL	527	10.9974	11.8752	6.99652	5.58217	14.3238	6.08119	7.13282	7.17348	7.93112	8.05584	12.5887	5.60367	7.07803	13.2369	8.10349	12.2643	11.3865	12.1631	7.00968	5.41177	10.9309	5.77055	15.2719	5.96203	12.0265	14.7299	15.0666	7.67208	10.8661	12.4997	7.27597	4.05494	6.63593	3.90163	4.03565	3.388	2.85728
DEPDC1B	528	20.6757	13.3173	6.27985	17.2828	6.57311	2.0596	14.7167	10.1967	20.5563	18.8584	9.28754	12.4988	6.8911	14.6219	11.9465	12.0184	12.2863	12.4162	10.5561	3.7231	1.70719	12.3684	12.1953	13.2866	6.29888	10.3969	11.6255	16.4328	12.3557	7.58897	6.78085	1.7399	10.2012	0.93896	0.769671	0.578634	1.69075
DAPK2	529	0.388176	0.680376	0.217129	0.222415	0.330178	0.158391	0.330604	0.202093	0.484624	0.488826	0.358577	0.30601	0.240337	0.423208	0.50017	0.481775	0.868927	1.08302	0.255442	0.103901	0.175827	0.493667	1.13263	0.305872	0.361468	0.221807	0.55888	0.405145	0.75603	0.565313	0.315328	0.178586	0.168496	0.060658	0.080974	0.030456	0.124437
NSMAF	530	2.9369	3.61051	2.59301	3.26573	2.87294	2.81013	3.06489	2.08432	3.71565	3.14938	3.469	3.3455	2.7597	3.71394	3.04171	3.12336	3.04196	2.99807	2.48262	1.69565	1.93506	3.11373	3.00707	2.8675	2.58406	2.10925	2.37262	2.59689	2.8714	2.60302	2.79233	3.96673	4.24394	3.40669	3.11974	3.59543	2.79743
ADSS	531	17.566	15.1196	17.3023	16.7598	16.008	16.4934	15.5352	17.0856	17.0324	17.9168	18.6238	17.6822	15.6304	17.051	16.3567	14.8395	10.0613	11.014	10.6474	10.4222	12.3242	10.0126	8.75487	12.1307	11.7259	10.9525	11.7079	9.3348	9.92771	12.1179	12.4959	14.8226	11.3032	13.524	12.3753	14.5711	19.2902
STAP1	532	0.064215	0.034185	0	0	0	0	0	0.024547	0.02722	0.088396	0.02777	0.047244	0	0.022878	0	0	0.00233	0	0	0.003165	0	0	0	0	0	0	0.07208	0	0	0.047793	0.026872	0.08736	0	0	0.033347	0.043059	0.098076
TIMP2	533	29.2234	41.4698	40.2024	40.0963	62.1304	41.4855	40.5149	7.25323	28.8412	24.4885	32.895	39.3468	57.9452	34.3125	36.1115	42.2396	43.0428	41.6893	56.9333	32.8306	60.0695	34.8983	37.2207	47.815	59.2905	48.0479	40.8977	43.6815	40.4949	56.8157	50.9926	60.9876	56.2009	86.12	73.4822	48.6436	37.9217
RFC1	534	11.0531	16.4805	8.92456	12.8205	11.4029	7.17481	13.5944	6.07079	12.0351	7.90602	8.44609	13.3172	9.08476	13.0973	9.50845	13.4141	15.7387	15.161	11.3378	5.95166	7.59462	10.861	16.2961	12.3532	15.0304	14.2127	16.6064	11.8566	13.4588	14.4418	7.88436	5.98245	8.61535	6.64196	7.87541	7.11706	4.47191
TBC1D23	535	9.76334	8.45394	6.82119	7.30008	9.05627	6.01209	7.67591	7.11887	9.06503	10.3381	10.1954	7.20092	8.94289	7.9116	9.8595	7.78748	5.4111	6.22725	6.84322	6.02353	6.59894	6.05291	6.52723	6.40392	8.43781	7.02739	8.17434	6.68433	5.59529	6.58933	9.5815	5.86924	8.04013	7.11889	6.66061	7.04968	14.2514
CUL3	536	15.4328	18.3938	12.4923	14.7516	15.7851	10.8509	17.3116	12.2642	16.4378	17.2433	14.1712	15.3431	14.4233	13.1084	17.6281	17.2522	17.0061	18.8217	16.1779	12.1129	11.3444	14.3333	15.7177	15.0312	18.9017	15.1706	19.8217	17.2334	16.1149	18.7141	13.0468	8.80855	12.3493	11.3311	12.4353	11.9038	15.4015
MYOM2	537	0.717341	1.02984	1.82725	0.921082	0.981393	1.50923	1.00044	0.979604	0.847773	0.869286	0.825503	1.20983	1.36318	0.895832	0.942499	0.785585	0.383275	0.422934	0.716814	0.815116	1.16473	0.397859	0.399368	0.539193	0.436099	0.613336	0.444364	0.356762	0.765467	0.614681	0.85097	1.00038	0.775206	1.08287	1.2534	0.967533	0.877252
OTC	538	0	0	0	0.011957	0	0.052399	0	0	0.05683	0	0	0	0.021486	0.010005	0.058716	0	0	0	0.084107	0.054337	0.053526	0	0	0	0	0	0	0.026164	0.023664	0.024945	0.028052	0.051498	0.049848	0	0	0	0.05612
CYP46A1	539	0.111061	0.198407	0.44604	0.181451	0.284619	1.02395	0.170683	0.238146	0.096456	0.140347	0.268303	0.367177	0.622458	0.117211	0.129366	0.154101	0.210683	0.332236	0.464858	1.00435	1.25945	0.480559	0.085575	0.653518	0.292806	0.320945	0.212165	0.148403	0.291021	0.172972	0.511146	1.24076	0.329308	0.605234	0.349483	0.303301	0.942631
ZZZ3	540	7.68234	7.74104	6.59584	7.43211	6.8224	4.6922	7.84666	4.55437	7.36795	7.31001	7.04976	7.06728	7.50166	7.86034	7.17784	7.69574	6.5818	6.08812	7.85533	4.73002	5.21626	6.67288	6.69038	7.54813	7.53491	6.53989	7.37436	7.38021	5.36669	7.20521	7.98671	5.1072	7.68707	5.90721	5.7609	6.5847	9.18441
SLC18A1	541	0	0	0.033343	0.016989	0.038108	0.032053	0	2.51514	0	0	0.059647	0	0.025813	2.02524	0	0.021818	0	0	0.012147	0.709596	0.043458	0.011528	0	0.01101	0.030057	0.094579	0.005276	0	0.009475	0	0.102028	0	0	0.015976	0.013075	0	0.090974
USP2	542	1.00879	1.35246	0.894006	0.792718	0.99484	0.592861	0.998258	0.231924	0.737495	0.461613	0.338175	1.06058	0.750587	1.10161	0.652446	1.39178	2.56326	2.25949	1.37218	0.40466	0.8357	1.63827	2.68943	1.65285	1.74829	2.04322	2.3659	1.4788	1.91671	1.72115	1.24987	1.36998	0.986727	2.53074	1.64677	1.25704	0.234377
CASR	543	0	0.01357	0	0	0	0.023543	0	0.015143	0	0	0	0	0.012697	0.028132	0	0	0	0.007597	0	0.032111	0.023777	0	0	0.024042	0	0.007075	0	0.015673	0	0	0.008289	0.015639	0.007364	0	0	0	0
TUBG2	544	3.05786	3.85891	4.60765	3.69016	4.1678	9.57511	3.29616	5.01469	2.89458	2.29643	3.92726	5.10512	4.70886	3.83081	2.93278	3.59857	5.24583	5.53625	4.77073	6.73879	7.82005	5.14907	4.92987	5.28406	4.20304	4.58537	5.50595	3.93928	6.11458	5.48423	4.2569	8.0076	4.27061	6.23088	7.71772	5.35959	3.61722
RPL26L1	545	11.9205	8.90754	14.6943	11.3348	8.66921	6.89621	10.3391	9.38887	12.5494	15.7596	15.2786	9.80614	9.66381	11.2153	12.8713	10.2918	8.0438	7.98276	9.68143	6.403	5.51956	8.95325	7.29739	6.14895	6.18879	9.58398	5.77521	8.61485	8.37748	6.87867	17.8027	12.756	14.3579	8.44121	9.88011	7.74938	20.5028
FLT4	546	1.06933	1.24121	0.942976	1.1882	1.24801	0.856118	1.19869	0.499479	0.670701	0.771361	0.709676	1.02832	0.840573	1.55855	0.818163	1.23638	0.836412	0.683639	0.994715	0.396817	0.852408	0.836044	0.878579	0.869346	0.768609	1.05426	1.26271	1.09049	1.106	0.908748	0.588345	0.706279	0.67292	0.598124	0.958711	0.668464	0.228768
NSUN2	547	6.87116	8.20846	5.47672	6.21687	6.86218	5.72433	6.78393	5.22574	6.52087	6.07461	5.42624	7.3622	5.74119	6.91241	6.60821	7.26294	4.9677	4.24818	3.07721	1.69	2.38374	3.89919	4.96976	3.31858	4.06186	3.48723	5.5622	3.54778	4.42569	4.22521	5.58577	5.46623	5.78612	5.60267	5.74153	6.00357	2.73141
FBXO42	548	4.8016	5.92985	5.55014	6.35532	5.60374	5.3706	6.03439	4.64257	4.37143	4.56458	4.05598	5.90889	5.46381	4.95096	4.8005	5.10687	8.32566	8.41943	7.11325	6.12147	6.76445	6.92317	8.11629	7.52164	7.49551	7.52341	7.15764	6.99402	8.21679	7.3944	4.64948	6.44953	5.87395	7.22894	6.50988	7.45249	3.46334
MFAP3	549	8.77317	8.30466	11.2553	10.6462	10.5369	7.98204	8.17208	12.0345	7.81087	8.79601	8.94883	9.41632	13.3075	10.2336	9.59906	8.26563	5.44883	6.40722	9.75891	13.8422	10.5269	6.46158	5.59033	9.56411	8.59984	9.5347	7.83599	6.37485	5.64928	8.94898	9.57109	13.2293	11.2888	12.3797	7.40667	10.2123	20.2944
MRI1	550	3.10825	5.7396	2.45598	3.25631	3.5583	4.51064	4.15105	1.94382	2.70937	2.48194	2.09793	3.87812	2.47468	3.61747	2.52456	3.64431	7.34513	7.1351	3.16919	2.77695	3.64983	5.71612	8.13934	5.78144	4.28102	4.24747	7.09622	5.62188	6.9874	5.18291	3.09592	3.79297	2.70525	4.53683	3.54216	2.21649	1.61022
METTL1	551	2.33924	1.89028	1.48259	1.75294	1.30124	1.07627	1.72827	0.933974	2.51508	2.75506	1.98836	1.56324	1.26101	2.52228	1.36525	2.00328	1.85062	1.48298	1.41384	0.670266	1.02762	1.19697	1.89172	1.18809	0.893656	1.75788	1.27308	1.74303	1.66094	0.991468	2.35202	1.46184	2.47325	1.21266	1.34782	1.27831	1.00133
HOXC8	552	0	0	0	0	0	0	0	0	0	0	0	0	0	0	0	0	0	0	0	0	0	0	0	0	0	0	0	0	0	0	0	0	0	0	0	0	0
AGA	553	4.92284	3.35684	1.96793	4.81243	3.43691	1.55225	4.04562	2.89697	3.85433	5.59869	4.25316	3.28667	2.73046	4.91323	4.06406	3.83499	2.50865	2.55	2.6877	1.12253	1.06677	2.3796	3.10327	3.02903	2.10201	3.44145	2.65482	4.03864	2.75748	2.21801	5.93679	0.611214	4.69658	1.52615	1.59462	1.76385	3.91904
PI4K2B	554	3.09616	2.18869	0.680285	1.67744	1.53531	0.687634	1.94127	0.620291	2.23136	2.48634	2.26578	1.51166	1.23552	1.9631	2.0206	1.8663	1.32919	1.4041	1.21966	0.223234	0.530562	1.17982	1.95279	1.50999	1.19623	1.40836	1.83121	1.7022	1.39066	1.14511	1.33652	0.441106	1.58588	0.544866	0.328584	0.305158	0.719998
BOD1L	555	1.63551	6.47046	3.04952	2.67097	4.68287	5.81113	3.40493	2.4341	1.21366	0.90954	1.02311	5.51658	3.45603	1.86033	1.91106	4.48598	5.71537	5.19929	3.88177	3.87206	5.2935	5.02119	5.02029	5.15289	7.87117	3.24499	7.22621	3.08819	4.68559	7.10038	3.08981	6.83432	3.67864	6.90519	7.25324	7.14934	2.82656
MAT2B	556	33.7294	20.2483	12.5042	22.8442	12.1857	6.30318	21.0479	14.0106	30.3416	31.3011	20.5415	17.0802	11.8911	22.3461	22.1048	22.0852	21.14	21.1073	17.2845	6.50332	6.54483	16.9256	25.0973	16.9009	14.59	21.1701	23.475	22.7287	22.458	16.5399	13.0409	6.52779	16.4803	2.38777	3.85898	4.10452	7.60216
TLL1	557	0.095223	0.251631	0.689141	0.306376	2.04599	0.417102	0.670307	5.00449	0.137635	0.116747	1.15884	0.926282	1.89941	0.176043	0.925154	0.15191	0.076661	0.135029	0.756389	3.44977	3.15188	0.412697	0.039935	0.392413	0.483843	0.726126	0.021396	0.101121	0.065496	0.162293	1.35242	0.156301	0.272769	1.18684	0.020215	0.014249	0.402293
EDC4	558	13.1201	17.0496	17.2101	16.8685	16.8958	17.1911	17.4279	12.5664	9.59675	8.59459	6.87024	19.0976	17.0897	12.543	11.411	16.3862	20.5493	19.8566	21.5639	18.2195	21.4463	19.5262	22.7291	19.9031	16.4898	19.1993	18.9997	23.471	21.1692	17.5568	14.6926	25.4837	20.9876	21.8006	23.0632	21.4923	10.0414
TRIO	559	3.91932	12.9993	14.1315	8.18218	13.922	23.8298	9.36918	7.38659	3.81007	2.52313	3.4006	15.405	14.7704	4.26664	5.77929	10.0874	12.9157	12.3349	15.2179	21.4514	25.8324	12.6484	9.93915	13.6987	19.3127	11.2231	14.5145	7.24134	13.5726	17.8848	10.0328	26.0346	12.5918	24.7364	22.9892	30.3879	8.51926
VCAN	560	19.5543	26.446	34.1905	33.9431	34.2619	24.3288	29.6698	6.7425	13.8791	8.76808	16.9486	51.7321	25.5606	24.7579	15.5294	23.8547	30.526	28.5501	36.3242	20.8741	32.4106	50.4103	42.663	41.5089	65.0073	46.4726	43.5703	36.3295	27.0453	48.7297	28.3356	59.6394	35.9285	50.6233	12.3026	8.57474	35.4298
CLEC16A	561	2.25257	3.71584	3.51514	3.25371	4.07137	6.37056	3.19009	2.88822	1.74714	1.52267	1.48544	4.15534	4.10683	2.3266	2.37252	3.45614	3.29516	3.39169	3.54174	4.0484	5.49086	3.25438	3.78709	3.4021	3.8606	3.6612	3.57619	3.16744	3.7056	3.58403	2.5136	7.01861	3.76504	4.29	5.12581	4.8293	1.74529
MSR1	562	0.059726	0.023361	0.011167	0.012802	0.04335	0.027019	0.007463	0.020855	0.086646	0.025034	0.196827	0.014915	0.017487	0.052862	0.01784	0.004732	0.05705	0.05224	0	0.010981	0.021856	0.005857	0.024111	0.010962	0.062387	0.160384	0.077106	0.021513	0.101445	0.040468	0.045661	0.005385	0.015214	0.028026	0.039056	0.041094	0.017128
CDH1	563	0.247505	0.213842	0.248388	0.054091	0.927713	0.139846	0.078127	0.016504	0.027327	0.049525	6.58372	0.031981	0.254878	0.04604	0.11281	0.350998	0.099019	0.223648	0.172664	0.061007	0.337699	0.018539	0.083334	0.156387	0.874237	0.169015	0.459388	0.042588	0.293341	0.785508	0.568128	0.467337	3.19289	1.6858	2.4199	1.93756	0.270103
SKIV2L2	564	22.2458	19.2766	16.5829	18.6777	17.616	10.6068	19.2694	18.0631	21.2347	21.6172	17.7506	17.3967	16.8218	18.327	21.0575	19.2261	16.6425	16.1558	17.5422	12.0596	10.7323	15.1511	15.8711	15.1543	20.1203	17.7551	19.5336	17.2678	14.6361	20.0158	16.9501	10.926	15.2455	11.8948	14.6122	13.1424	17.085
DNAH5	565	0.045795	0.07928	0.387984	0.168981	0.141085	0.088031	0.147247	0.084669	0.054528	0.021183	0.040935	0.173746	0.162796	0.135064	0.056108	0.044661	0.091347	0.107675	0.215425	0.309632	0.208686	0.204391	0.077384	0.246605	0.216689	0.192653	0.10969	0.172228	0.119644	0.152638	0.099335	0.117038	0.119409	0.242855	0.242937	0.225851	0.121136
ZFYVE16	566	3.17791	3.64912	2.04566	3.15035	2.73822	1.69002	3.22791	1.8865	2.72438	2.68733	2.90605	3.26059	2.62968	3.87612	2.78763	2.99167	3.61525	3.95861	3.41756	2.01372	2.23661	5.12768	4.88229	5.4622	4.16614	2.88755	4.0776	4.4141	3.22014	3.91983	2.4242	1.90519	2.75828	2.0523	1.85197	1.70916	3.4329
FAM65A	567	9.01782	17.0486	14.1197	13.5512	19.1399	23.2713	15.924	12.3113	5.20081	4.83861	4.23944	18.8363	15.1253	8.1147	9.07199	14.9627	21.0935	23.1452	20.7022	23.6377	24.2501	20.4816	19.0513	20.3173	24.9065	19.4613	22.9842	21.6075	24.3975	25.0361	15.0006	25.1365	15.5576	36.0124	41.5669	23.7934	6.42943
C6	568	0	0	0.147277	0.00696	0.023818	0	0.007349	0	0	0.0206	0.068884	0.033257	0.052892	0.007889	0.019397	0.007683	0	0.017219	0.01002	0	0.008901	0.019149	0	0.018165	0	0.008019	0	0	0	0	0.009394	0.392329	0.08335	0.006589	0	0	0.028062
RAI14	569	12.0733	21.6489	8.73374	17.5613	14.7084	4.53692	20.4697	4.58355	10.6586	10.7468	8.23441	22.9742	9.76888	8.0426	15.0447	18.3052	24.6775	21.2145	16.5785	2.84558	3.37221	25.0263	25.7708	22.5127	20.7135	11.9431	20.2056	26.7915	18.7041	23.986	5.94582	2.82159	7.40695	8.25662	20.6035	23.8097	1.37977
SOX30	570	0.062325	0.100182	0.177035	0.049743	0.092122	0.133812	0.050874	0.070508	0.065155	0.056423	0.067199	0.066611	0.103991	0.11796	0.04039	0.132026	0.001593	0.056402	0.041167	0.170222	0.084661	0.039603	0.037013	0.037314	0.03875	0.05075	0.069484	0.012163	0.046383	0.137279	0.040332	0.06593	0.08001	0.074752	0.190525	0.106549	0.130942
PNKP	571	10.1763	8.44245	8.63175	8.62402	7.42758	8.69738	8.46281	6.63446	11.1328	11.4389	10.3382	7.52206	6.88982	11.9711	7.58646	7.63898	9.7985	9.82833	6.38621	5.21657	5.5921	8.45337	9.18028	7.09442	5.63225	9.15055	7.29455	9.28312	10.1673	5.99484	7.55749	8.47216	7.34787	6.12826	5.87608	5.70025	4.56081
BEST2	572	0	0.01379	0	0	0.037325	0	0	0	0	0	0	0	0	0	0	0.013967	0	0.092635	0	0	0.066692	0	0	0.016288	0	0.01438	0	0.020662	0.014406	0	0	0.031785	0.014967	0	0.02872	0	0
PHLPP2	573	1.46142	2.58855	1.73452	1.82938	1.94392	2.32912	1.76721	1.30886	1.2229	0.969817	0.809996	2.28142	2.05021	1.58451	1.38846	2.17492	2.05695	1.87993	1.5336	1.47518	2.00389	1.54546	2.08244	1.94876	2.38427	1.79225	2.29872	1.28408	2.00705	1.96239	1.59766	2.73068	2.03225	2.66215	2.28199	2.81331	1.75651
CCDC99	574	7.39462	7.86413	6.16421	7.3731	5.82429	3.52909	8.62574	4.04474	8.7895	7.7347	6.12395	7.59818	5.10618	6.89037	7.31363	6.61	7.80732	7.04412	7.14033	3.36785	3.46537	7.36329	7.94452	7.80451	7.50528	6.2774	7.90129	8.33853	6.45221	6.44583	4.11676	3.58924	5.10254	1.84059	2.91195	2.68564	2.59428
STAU2	575	11.4863	10.6512	14.4508	12.6052	12.5598	10.0273	12.7705	16.0851	11.6255	12.6327	11.4887	12.707	14.0725	10.1719	13.8934	10.4311	11.0037	11.0535	13.6634	18.0595	13.3864	12.8727	9.76333	12.5455	14.2019	12.1054	11.2239	12.9392	10.3254	13.698	11.5793	14.1699	9.54046	10.4692	9.53734	11.2903	18.644
PQLC2	576	4.13973	4.64981	3.27239	3.7082	4.58464	4.06467	3.87378	2.7919	2.62732	2.98324	3.46469	4.02175	4.29558	4.00042	3.52692	4.16122	3.94831	4.50448	3.19795	3.09114	3.90701	3.51132	4.66632	3.70495	3.77021	3.81501	4.23499	3.89044	4.58153	3.74298	4.81526	6.03957	4.7111	5.96498	5.63253	4.81286	2.55498
CTNS	577	3.60131	2.7496	2.37486	2.72723	3.03783	3.13111	3.09275	1.69677	3.55462	3.13249	3.59018	2.33098	3.06855	4.24746	2.87663	3.08007	2.81921	3.03462	2.84028	1.83584	2.76116	2.25679	2.94981	2.35381	2.43635	3.37525	2.86032	2.45506	2.97497	1.96052	3.93833	2.50185	3.84081	2.44696	2.27643	1.90229	2.16185
RTN4R	578	6.95265	6.42364	5.91035	6.42345	6.59834	11.126	7.65364	12.2631	7.14802	7.0633	4.84264	6.5946	6.99922	8.94378	6.84511	6.33877	9.35108	9.60351	8.38264	12.5047	9.84656	7.07718	11.4389	6.20869	4.58704	7.71299	6.59673	12.6102	12.2166	5.71652	6.2943	8.43531	9.77636	11.2495	7.61589	7.9256	7.01928
PHF23	579	34.4846	27.994	28.8879	22.072	28.8979	28.7419	25.5135	33.0845	37.6693	35.1377	30.9089	24.933	26.4478	32.089	28.5184	30.6298	27.2755	27.2417	18.4232	20.5681	19.8536	14.095	23.1061	14.5752	19.5774	27.6671	24.6207	19.9239	29.4983	20.5075	25.7502	22.4684	21.7881	20.5486	21.987	17.7579	18.6531
CDH10	580	0.987584	2.462	6.08144	4.56215	3.80729	3.43419	3.58397	3.23734	3.82015	3.04573	6.47645	6.11066	3.975	1.36419	3.17908	1.83308	3.94666	5.106	4.17138	1.91653	3.79501	3.92283	3.69963	5.65174	2.92854	1.20983	1.63729	3.4581	3.27617	1.88633	2.46263	8.81378	4.23201	7.00978	0.54109	1.43359	5.34442
INPP4A	581	6.92316	7.806	8.70678	5.25494	9.11989	9.91965	5.70526	6.34166	5.72943	5.03436	4.60028	7.56712	9.29614	5.3538	6.80451	7.97177	7.21015	7.34582	6.64918	11.0807	11.9705	6.22944	6.50231	6.58456	9.57504	7.89032	8.88511	5.09073	7.33463	9.10233	5.88982	11.8547	5.84813	12.5678	10.9049	12.3086	6.64351
RAB27B	582	0.252428	0.151396	1.23676	0.871703	0.857023	2.02271	0.435108	1.04332	0.284252	0.335789	1.16248	0.818122	2.07368	0.695502	0.287276	0.158564	0.061592	0.146184	1.28567	2.91225	2.51756	0.588842	0.043147	1.40597	0.154686	0.466628	0.103671	0.410003	0.141859	0.107857	0.503698	1.61992	1.16885	0.201261	0.082105	0.061234	20.1451
PSMA4	583	39.618	24.0464	30.0069	30.3309	26.6344	19.5929	31.5838	30.9016	41.2393	50.7782	47.2984	25.5469	27.3452	38.6913	37.1565	28.4676	16.5462	15.4083	22.4881	15.0278	12.7913	18.1759	15.5391	17.6685	15.2308	20.2957	16.7114	19.2159	13.8383	16.2329	52.79	16.206	30.6713	14.6668	14.5481	11.477	58.3671
MYO16	584	1.30822	2.04778	3.17674	1.72523	2.79616	4.11674	0.917471	8.9638	0.910598	0.709493	1.1328	3.10079	3.04692	2.67949	1.34955	2.29492	1.73687	1.4765	1.60985	18.374	6.21975	1.72811	2.29958	3.75272	4.09194	2.63662	2.33603	1.01772	1.64475	4.00437	2.90487	3.54267	1.3031	4.69247	3.41228	2.99797	8.85849
LSG1	585	7.95194	8.81349	7.52336	8.27843	7.59669	7.11777	8.70534	5.53708	8.52638	6.12418	6.35297	8.65044	7.51173	9.09796	6.81532	8.00684	10.0473	9.05391	7.73528	6.38481	7.38591	7.62784	9.90813	8.0717	7.8617	9.28627	8.49647	9.65995	9.89181	8.16068	6.56835	8.30067	7.60907	8.09716	6.15038	9.47433	4.09036
PARP3	586	0.925405	1.24256	1.41939	0.898904	1.46571	1.87048	0.973052	1.43718	1.10776	1.03191	1.46467	1.10671	1.47505	1.85037	1.49107	1.15052	1.84813	1.68657	1.66397	1.54171	1.89176	1.36274	1.56189	1.94738	1.35801	1.8215	1.58512	1.27523	1.77537	1.50084	1.28787	2.44628	1.21174	1.55821	1.4935	1.16685	0.700936
TNC	587	0.255638	1.19902	12.5096	5.52978	1.15176	7.11708	14.2335	3.79196	3.77202	0.642671	7.69257	12.5133	5.48869	45.3704	1.95952	0.956602	3.71169	13.0796	22.5917	22.5991	17.0165	28.1714	5.96675	15.9259	2.97736	14.9166	1.15553	34.2175	9.11239	3.87231	56.1985	5.52924	23.3181	0.028745	0.429588	0.237429	7.42804
THAP3	588	9.05324	8.06782	9.03677	8.3801	8.18361	9.99258	8.734	6.09225	6.79304	7.63578	7.3739	8.84738	7.84955	7.72506	6.8753	8.13245	10.3591	9.97237	9.45939	5.56707	9.3809	7.19511	9.61169	7.85853	7.09314	8.90118	9.41702	9.73495	9.82818	8.14436	8.24896	12.4363	10.2665	10.0545	10.1075	8.29881	5.12562
FAM65C	589	0.066692	0.112492	0.05706	0.231185	0.087935	0.212389	0.129019	0.027103	0.044878	0.032533	0.25999	0.117277	0.112858	0.084741	0.061999	0.147347	0.255589	0.276887	0.173213	0.085528	0.162716	0.287593	0.375335	0.51113	0.217458	0.177114	0.173277	0.409977	0.244897	0.298521	0.273446	0.07272	0.635889	0.029813	0.101253	0.02361	0.253572
TDP1	590	6.25285	5.36915	4.77158	7.65691	4.02112	3.94937	6.40726	4.83235	5.24334	5.25228	4.0377	6.65235	4.24449	5.79612	4.2605	5.40992	5.93931	5.47283	4.43907	3.25104	2.91278	5.6868	6.02697	5.07479	4.05306	3.88472	5.44931	5.64223	5.16498	4.39266	2.7942	4.38172	5.0346	3.00724	2.51953	2.50785	2.45039
AIFM2	591	0.181313	0.256066	0.386006	0.529374	0.357436	0.397188	0.401126	0.428255	0.368354	0.339015	0.473778	0.615553	0.165875	0.436112	0.271491	0.308602	0.514044	0.571354	0.342572	0.478728	0.424275	0.980593	0.494868	0.860148	0.374204	0.443169	0.359442	0.525376	0.542448	0.358764	0.433134	0.692996	0.415501	0.521778	0.372031	0.402315	0.677951
C2orf83	592	0	0	0.231814	0.144197	0.018084	0	0.01697	0	0	0	0	0.147127	0.016389	0	0	0	0	0	0.022825	0	0	0.554572	0	0.062066	0.023612	0	0	0.020231	0	0	0	0.305801	0	0	0.018364	0	0.213749
SPATA7	593	2.99281	2.35559	2.97568	3.66744	2.41962	3.20597	2.88581	3.52668	2.89911	3.07433	2.98557	3.12165	2.95091	3.24446	2.19844	2.31799	2.3744	2.12891	3.23365	3.37503	3.21611	2.84102	1.77743	3.37606	2.83105	2.715	2.29891	2.5841	2.2239	2.6631	2.94136	2.9114	3.1906	2.20704	2.13309	2.19332	4.15234
MED17	594	6.44399	6.06195	5.59172	5.93839	5.12835	3.83924	5.85096	3.98039	4.98194	5.48195	4.0564	5.53694	5.42763	5.66951	5.22912	5.57733	3.25075	3.30825	2.67727	1.25506	2.10959	2.54401	3.05445	2.71841	3.44021	3.00647	3.67119	2.61077	3.04498	3.06285	4.79363	4.91951	5.21939	4.22383	4.65277	5.01269	3.61788
RETSAT	595	2.57535	2.58952	2.41063	2.05769	3.01225	3.1694	2.17612	1.94492	2.82074	2.76835	3.95528	1.88944	2.37671	3.18778	2.52566	2.90505	3.29523	3.30126	2.64468	2.81467	3.37499	2.47408	3.29253	2.05339	3.0165	3.82973	2.95817	3.19258	3.64706	2.8178	4.27609	2.40506	3.04884	2.51985	3.41546	3.40551	2.38624
CAPG	596	17.0799	9.31394	4.47227	6.9702	7.78687	2.95153	9.59762	0.904904	10.0552	13.3308	5.23171	4.61429	4.93621	11.0193	10.6791	11.9285	11.7745	9.22389	6.54809	1.05116	2.1653	5.70958	13.302	4.73191	5.09672	9.82482	7.63827	10.4584	10.7226	6.74683	11.506	1.75709	14.3323	0.761862	1.81066	0.507503	1.56591
AP2S1	597	67.3424	50.8781	68.4466	55.1857	67.9535	60.0548	52.5578	53.8688	71.858	90.7062	91.2703	54.3624	61.6948	66.4966	67.2391	58.916	41.0776	48.8146	41.813	44.5383	48.7517	38.3892	34.4269	31.2453	31.6862	52.3845	36.6392	46.9734	53.0952	35.0679	65.5497	57.1111	62.3638	54.8955	54.9783	55.483	47.2333
USH2A	598	0.001536	0.008865	0.015941	0.010595	0.007298	0.032755	0.006871	0.03032	0.004121	0	0.009076	0.007694	0.013249	0.012858	0.002267	0	0.005956	0.001985	0.032252	0.020921	0.04982	0.017781	0.00366	0.012424	0	0.003698	0	0.010212	0.001852	0.013457	0.004332	0.018335	0.007646	0.006077	0.007436	0.005206	0.071527
ZPBP	599	0.013592	0	0	0.012642	0	0.013568	0	0	0.016821	0	0.052901	0	0	0.018398	0	0	0	0	0	0	0.016169	0	0	0	0.036648	0.029708	0.012519	0	0.014395	0	0.050499	0	0	0.035264	0	0	0.016838
TG	600	0.004409	0.070844	0.026513	0.093538	0.095257	0.085163	0.01269	1.2822	0.042163	0.102187	0.037318	0.063391	0.045171	0.338586	0.04871	0.076102	0.062032	0.032451	0.016953	0.905533	0.095748	0.0294	0.035487	0.081325	0.057742	0.047527	0.02741	0.021517	0.043916	0.07552	0.026758	0.017288	0.016954	0.131162	0.184831	0.125553	0.015951
ADAM28	601	0.019208	0.031082	0.051491	0.081483	0.051705	0.175963	0.037475	0.060832	0.047996	0.052167	0.143438	0.080079	0.065275	0.113062	0.034679	0.007804	0.043488	0.030428	0.045798	0.138984	0.214314	0.0729	0.076307	0.090067	0.089135	0.101032	0.017856	0.035717	0.040464	0.076074	0.104113	0.054858	0.144111	0.106314	0.141692	0.060584	0.118458
BARX2	602	0.045794	0	0.027833	0.021369	0.024047	0.013469	0.011283	0	0	0.124794	0.238048	0	0.010896	0.12112	0	0.02359	0	0.195579	0	0	0.013665	0	0	0	0	0.121274	0	0	0.267486	0.02496	0.028453	0.040083	0	0	0	0.011398	0
DCUN1D1	603	5.80183	4.33083	3.44013	4.0007	4.31525	3.00915	4.20763	4.30652	5.61399	5.29471	5.81371	3.87859	4.96605	5.19135	5.40034	4.40049	2.51085	2.95353	3.61259	3.26737	3.23213	3.26088	3.09685	3.29101	3.94234	4.47282	3.59628	3.133	3.16953	3.22548	7.18332	4.03722	5.12668	4.46819	4.10686	4.3446	12.1237
PHF15	604	0.231914	0.338678	0.288892	0.119719	0.455938	0.267067	0.075281	0.057621	0.221282	0.178276	0.467099	0.175163	0.370827	0.405272	0.202591	0.28744	0.309804	0.368382	0.170431	0.063934	0.266842	0.215826	0.210128	0.274921	0.283484	0.452824	0.296913	0.050913	0.571831	0.399669	0.427004	0.887502	0.229667	0.994885	1.12269	0.965253	0.148205
ZIC2	605	9.21115	13.5974	5.96401	1.71142	18.624	35.1778	1.9379	140.523	21.19	9.69268	15.3292	5.10079	14.3965	61.4227	7.64776	12.6207	18.1348	26.9313	15.4884	106.316	58.2495	2.13421	16.2104	5.33206	12.7296	35.03	20.0236	3.28693	34.7453	15.98	21.1493	3.40538	5.15501	6.31903	5.50427	3.74124	61.3865
LCP2	606	0.221754	0.220509	0.240755	0.156101	0.216889	0.294273	0.111744	0.038918	0.204969	0.262555	0.249004	0.098514	0.131484	0.338583	0.230968	0.268828	0.122954	0.089555	0.072126	0.047561	0.251385	0.063139	0.139895	0.073195	0.161923	0.208665	0.204606	0.121157	0.225301	0.223018	0.146905	0.074801	0.119265	0.145566	0.283068	0.200525	0.085983
TRIT1	607	2.99115	4.14242	2.7598	3.38785	2.30632	4.17379	3.03517	3.28487	3.13875	2.7009	3.30966	3.91663	2.7268	3.80895	2.4864	3.2989	6.00444	5.71481	2.80817	2.99613	4.18328	5.37436	4.9881	5.49941	4.5358	3.31322	6.17226	2.64455	4.92642	4.64696	2.89394	3.84102	3.45023	3.39809	2.90381	2.64637	2.81319
ADRB1	608	0.050475	0.063963	0.32322	0.023474	0.200618	0.207143	0.012394	0.014276	0.047063	0.051407	0.146897	0.111407	0.167577	0.013305	0.032711	0.038871	0.014324	0.042969	0.01667	0.008591	0.075056	0.064146	0.013204	0.1511	0.051735	0	0.0282	0	0.066821	0.125076	0.093767	1.89154	0.166623	1.41755	2.96683	0.235693	0.20491
GUCA2B	609	0	0	0	0	0	0	0	0	0	0	0	0	0.045538	0	0	0	0	0	0	0	0	0	0	0	0	0	0	0	0	0	0	0	0	0	0	0	0
CUL7	610	9.67839	10.9498	10.8619	9.6371	11.5115	12.6466	8.69057	8.2685	8.81653	7.01112	8.61396	10.8162	10.3205	12.3439	7.90868	11.3853	16.5306	17.0328	11.8658	12.4953	16.1831	12.7001	18.3537	13.0133	14.0124	17.41	16.5703	13.2586	18.2625	15.0085	8.74657	12.8827	8.44624	11.0807	13.078	12.5623	4.26099
CTNNA1	611	25.4981	28.8997	24.721	31.7987	25.0854	18.8794	32.8572	33.9077	23.1609	21.2681	24.2993	29.9259	22.4834	38.8666	24.6467	29.6901	38.4607	34.9056	32.3757	24.1803	23.6151	32.4194	43.7581	30.543	27.4663	34.8749	31.3802	39.9135	32.1731	30.6331	22.2976	13.2263	28.2921	12.2452	11.997	13.1079	12.1181
PHKA2	612	2.36835	2.53019	2.55916	3.55789	2.11029	1.61825	2.62246	1.29606	1.81246	1.88649	1.99614	3.11809	1.9923	2.53986	1.91032	2.23396	3.07686	3.25959	2.8355	1.85166	2.14757	3.51996	3.2519	3.98847	2.44767	3.07065	3.15667	3.53862	3.20526	3.01401	1.95106	2.74328	2.31554	3.04942	2.51903	2.87444	0.955674
CNTLN	613	4.07206	6.72475	1.31566	2.41323	2.78153	1.21513	3.26398	2.49977	5.289	3.25975	2.1787	3.46467	1.63035	4.00108	3.6439	5.2675	8.08719	7.72368	3.27752	1.70866	1.41342	4.52104	9.45782	3.82146	5.88701	5.02984	9.76368	4.85504	6.79037	6.78962	1.76204	0.857519	1.61605	0.552991	0.786904	0.649852	0.473038
EPHA3	614	10.9632	7.66263	31.557	22.6609	19.9289	8.94325	57.0681	41.0863	1.5722	2.22285	11.2638	26.0822	30.6899	7.39458	8.01416	9.37344	2.33099	2.38378	66.4034	34.4797	11.0848	30.8305	7.59122	16.2987	17.0588	13.3549	9.41524	68.9568	1.87595	10.4217	7.12441	3.73984	43.4503	21.0117	0.944445	1.32872	14.9616
HSPA5	615	55.782	61.2369	57.7406	53.1252	69.164	59.7543	55.5409	64.8631	59.0879	54.8021	82.2365	52.0783	60.3294	80.4123	57.4538	57.0175	37.0574	36.4788	51.0735	57.4837	62.2241	37.0488	36.0659	50.4432	43.9919	50.607	40.7691	46.9461	34.8503	44.4081	63.5147	35.3715	49.2855	33.7943	33.3002	34.203	41.9568
DSG2	616	4.2837	4.25266	2.30964	5.25123	4.09517	0.648305	4.01299	2.52552	5.71065	3.50449	5.14039	3.72078	2.69165	6.76645	2.94395	3.36382	4.96086	6.40876	5.56864	2.26404	1.7831	5.68001	5.68382	7.14312	3.23661	7.94285	6.3196	7.91884	6.9693	4.55227	3.06315	0.920687	3.74644	1.46509	0.872266	1.04063	2.02433
GEMIN8	617	3.81012	3.75128	5.30131	4.19827	3.52787	4.14574	3.92794	4.14417	4.3008	5.59381	4.94259	4.01315	4.43735	4.46076	3.81257	3.84959	5.0819	5.05107	4.91378	4.46899	4.34934	6.02229	5.02265	4.67241	3.67808	2.96361	3.83342	5.0135	5.13863	3.9731	4.59139	5.85866	6.20376	5.02933	5.37451	4.85091	4.21521
OFD1	618	1.40664	2.5137	1.60031	1.578	1.53702	1.85244	1.9737	1.95688	1.94637	1.60483	1.48846	2.24431	1.38426	1.96468	1.61839	1.72051	2.61807	2.36481	1.41503	1.56065	1.83403	2.99879	2.12176	2.65874	2.23715	1.48842	2.30748	1.65536	2.23309	2.1738	1.93476	1.87951	1.98164	1.94723	2.3289	2.30811	1.55664
GPM6B	619	46.1931	45.064	58.7717	62.9295	44.3478	40.3825	71.8635	59.6831	54.3147	61.0699	65.4905	50.7918	77.038	58.5319	59.9451	43.7146	42.1194	48.7851	101.832	46.9797	47.265	64.1918	56.3044	66.9056	40.9225	56.2281	37.2925	87.1481	38.0055	44.9352	90.3901	40.3505	147.184	31.195	29.4637	30.9656	124.108
MAGEC2	620	0	0	0	0	0	0	0	0	0	0	0	0	0	0	0	0	0	0	0	0	0	0	0	0	0	0	0	0	0	0	0	0	0	0.01574	0	0	0
PREX2	621	3.27977	4.62607	1.27748	0.496975	2.30085	1.08199	1.69884	1.14369	7.28185	3.31512	2.7613	1.30949	1.86007	5.11779	3.57065	4.01493	8.12026	7.5894	2.13399	1.60645	2.27875	2.12273	9.52442	0.69587	3.38886	5.838	5.17364	1.78817	7.05285	4.33939	3.30964	0.358857	1.99009	1.24282	0.717388	4.19741	1.21574
WDR37	622	7.53042	7.30642	11.1423	6.55452	9.20603	12.599	6.81131	5.79317	6.49751	6.74082	6.64127	8.24567	13.2559	5.88581	7.24489	7.46855	4.17017	3.92538	7.16528	5.07991	11.5209	4.11468	3.7108	5.83829	6.77167	5.0184	5.00954	3.09252	4.13915	4.98577	7.71012	11.8554	8.52804	9.43652	9.87007	10.3627	6.64856
YTHDC2	623	3.46541	4.61728	3.18457	3.60382	3.51976	3.26825	3.37731	2.75109	3.53272	3.0454	2.79993	4.30578	3.51142	3.22068	3.67673	3.87802	5.21842	5.05723	3.40622	3.81006	3.66042	5.13525	5.45918	5.68998	4.96884	3.85959	5.68227	3.7253	4.6966	4.65779	2.48974	3.21941	2.21881	3.51333	3.11275	4.01974	3.36291
CTPS2	624	13.4974	10.2931	8.99962	10.4009	8.93595	7.31708	10.4798	11.4288	11.5088	10.919	10.2588	9.25186	9.55684	14.3126	9.54563	10.6149	12.001	11.0526	11.4405	9.47913	8.48669	8.98724	12.6665	9.2126	10.7047	12.1267	11.815	11.0995	10.4192	10.853	6.20475	3.88109	7.6801	4.34912	4.04068	4.01874	4.44811
ATP6V1H	625	10.878	11.4618	15.6043	10.3764	13.4325	14.8439	10.538	17.2515	9.30089	12.5606	12.9972	11.3836	14.3305	9.40656	12.5066	11.0218	9.93368	9.40836	10.6134	20.0696	14.6163	8.31842	7.79034	9.01414	11.0453	10.3716	9.89203	8.0523	9.08688	11.2144	10.1282	13.2172	9.54968	12.2083	11.3671	13.2265	15.7192
POLR2B	626	45.7864	41.798	44.8069	36.8877	44.2133	28.4788	38.5838	33.4673	39.4282	45.9151	36.2045	35.6563	43.8212	34.5768	44.1458	42.3073	36.3893	34.3092	40.5759	30.6585	32.0166	28.3766	32.5409	30.3031	46.3416	41.9163	41.182	34.4024	35.3648	44.2601	48.3206	35.7412	39.8375	42.3211	43.8412	48.8673	36.3726
KIAA1370	627	3.9564	6.26184	4.59794	4.63791	5.42108	4.27311	6.04887	4.30075	3.31902	3.95681	4.27728	6.26571	7.44378	4.52658	5.04609	5.03225	4.13498	5.03029	5.65332	3.29816	4.38641	5.82582	5.47835	4.89639	5.70106	4.14712	4.77741	4.8469	3.62112	4.58704	5.9695	4.65585	7.94336	4.36567	4.65398	5.28261	4.21472
ARAP2	628	0.070582	0.143338	0.404925	0.37406	0.213013	0.219306	0.684877	0.066063	0.151681	0.11868	0.264246	0.912181	0.311641	0.197326	0.22041	0.059729	0.216469	0.293881	0.8936	0.215545	0.320622	1.96401	0.234667	0.874422	0.1593	0.123108	0.050876	1.33093	0.179979	0.223881	0.169726	0.391633	1.35106	0.148074	0.083956	0.275488	0.902066
TPR	629	9.26897	21.4788	10.7958	12.3859	13.1818	12.5695	15.2896	8.75778	9.03996	5.57081	5.6175	17.984	10.1743	10.8081	9.63098	16.7255	21.363	19.4991	16.75	14.7809	14.4575	18.717	23.0543	21.1463	24.2578	16.9839	26.2273	17.4687	19.0429	24.6486	8.22337	11.3059	9.67072	9.8712	11.7811	12.5923	4.73839
CP	630	0.281464	0.30935	0.346239	0.47742	0.22003	0.409034	0.436851	0.285667	0.273003	0.281568	0.338936	0.362744	0.465315	2.03435	0.232689	0.307573	0.281403	0.261547	0.384345	0.236301	0.267529	0.376353	0.26512	0.443117	0.308708	0.402564	0.250171	0.287234	0.311164	0.415123	0.967999	0.176626	0.282846	0.326063	0.269098	0.357187	0.514387
KIAA0556	631	1.33498	2.56478	1.24533	1.58635	2.18241	2.46797	1.95672	0.973698	0.867586	0.805335	0.788388	2.16953	1.65164	1.83249	1.18099	2.05297	3.11252	3.03358	2.08159	1.48606	2.14691	2.49003	3.63169	2.13431	2.91307	2.54759	3.43939	2.34704	3.08521	2.94019	1.80372	2.18354	1.87037	2.86012	2.79054	1.98898	0.640015
DTNBP1	632	4.23607	3.71838	5.47776	3.49575	4.81903	5.96412	3.18324	5.26377	4.26167	4.27482	4.51208	3.56077	4.62658	5.33185	3.95495	3.52997	4.07034	3.93717	3.32038	7.52698	5.82083	3.52328	2.52882	3.50365	4.27977	4.09047	3.87086	1.77553	3.4996	4.25231	4.78912	15.6482	3.11558	4.89856	4.70915	3.53778	14.3702
XK	633	0.603397	0.505955	0.954898	0.444936	0.986892	1.04807	0.387914	0.807954	0.661487	0.592842	1.86124	0.443931	1.57218	1.69162	0.574838	0.526991	0.401401	0.506908	0.983214	1.21705	1.46692	0.581495	0.340786	0.722407	0.786186	1.0028	0.68941	0.30849	0.601722	0.694777	1.73252	0.718788	0.557114	0.903047	0.94647	0.740431	4.09788
ANO2	634	0.377649	0.238462	0.53105	0.226175	0.516388	0.471037	0.238223	0.557779	0.129118	0.162727	0.409183	0.350645	0.528434	0.709787	0.177434	0.276889	0.130009	0.357459	0.419949	1.5665	0.967458	0.385673	0.281913	0.541303	0.524301	0.727136	0.540641	0.214211	0.512349	0.372151	0.417141	0.941185	0.20842	0.169555	0.135483	0.111788	0.80296
C12orf4	635	6.52506	5.73943	6.60715	4.37291	6.47343	3.69137	4.72008	4.25499	5.82261	6.74357	6.70684	4.71635	6.93052	4.5304	6.38199	5.42462	3.92261	3.62143	3.62396	4.21224	3.99296	3.34965	3.20079	3.44372	5.26849	4.1591	4.46718	3.03456	3.52222	5.68363	10.0953	6.80957	5.8512	9.30935	8.19092	8.2233	18.277
SCML1	636	3.58092	3.40494	1.1701	2.29314	2.41453	0.60221	2.6893	1.41167	2.45117	3.20115	2.09822	2.1615	1.82376	1.84932	2.90681	2.90269	4.45118	4.19109	3.19993	1.25452	1.16959	4.80983	5.64128	4.41361	3.64663	2.50268	4.52019	4.13436	3.9702	3.96709	1.64775	0.637015	1.64211	1.16079	0.737796	0.727637	1.15002
WWC3	637	2.16008	4.02208	2.27245	3.37738	3.03801	2.7263	4.76358	1.51565	1.96421	1.64317	2.90828	4.51929	2.33671	2.98231	2.13861	3.25086	4.77376	4.74595	4.57749	2.05287	2.98291	5.79469	6.32817	4.41361	4.25296	3.4309	4.75249	5.9838	3.88095	4.38896	1.40306	1.5877	3.10587	1.53405	1.06367	1.17614	0.540323
ARHGAP6	638	0.110252	0.134928	0.094532	0.064065	0.281364	1.12254	0.05918	0.063156	0.069887	0.087204	0.507358	0.081801	0.10215	0.351939	0.11133	0.186864	0.12462	0.117072	0.102232	0.087021	1.3562	0.065762	0.070058	0.173466	0.211594	0.14064	0.168903	0.040189	0.281978	0.164678	0.047776	0.198125	0.05181	0.097046	0.132236	0.089505	0.069374
FAM184B	639	3.69326	8.33546	3.16135	3.47911	7.0027	5.17579	4.60255	1.96579	4.41532	4.3805	2.77745	6.87989	4.94429	3.31539	7.4211	6.56615	15.4275	12.8223	3.89904	3.41521	5.91923	7.67893	14.8391	5.73807	10.1566	4.88759	8.00291	4.09654	8.63462	11.4024	3.69715	6.96561	2.61396	7.49782	8.96252	10.3486	2.86151
MAP4	640	12.6736	18.1372	27.2089	20.6731	23.5815	34.578	22.083	28.7809	10.9836	10.5948	13.5532	25.3185	28.1902	15.5701	16.0347	16.845	21.5346	20.8782	29.3073	39.9084	35.9413	22.5175	21.9764	24.654	23.9781	23.4208	20.769	24.0771	20.0045	24.2352	30.0284	26.4128	25.6654	20.2089	20.4284	20.2499	37.9712
GOPC	641	15.0266	14.1825	11.9023	13.738	14.0572	10.5934	13.8355	12.6176	11.729	13.4789	12.1315	13.9871	15.2036	11.1787	14.654	13.4512	11.2205	11.5877	14.6404	11.43	10.6736	13.9782	13.1068	16.4025	14.9767	11.1092	15.8398	11.885	9.50112	14.0461	11.4183	12.7576	12.7323	11.7834	11.869	12.3395	22.0347
ROS1	642	0	0	0	0	0	0	0	0.005173	0	0	0	0.010092	0	0	0	0	0	0	0.006041	0	0	0	0	0	0	0	0	0	0	0	0	0.00527	0	0	0	0.004537	0
USP28	643	8.77198	8.4193	4.50253	5.61043	4.93949	3.38936	7.14541	1.65003	8.24042	6.36931	5.13637	5.98467	5.11247	7.25284	6.18959	7.9107	10.2759	10.3052	7.26487	2.51512	3.91841	7.09091	11.905	6.56799	8.76348	9.44972	10.3218	7.70874	9.29597	8.82194	4.24869	2.57622	5.94024	3.47083	3.38749	3.56709	1.17436
HDAC9	644	14.1156	9.14697	4.23759	8.86289	4.6584	1.35471	9.26391	2.41695	10.485	7.76351	3.97905	5.62576	6.68825	10.4107	7.16918	9.69122	9.30302	10.0701	10.2483	4.12345	2.10469	7.95331	10.8756	8.84709	7.56551	16.3988	12.4916	12.7963	12.3088	7.1254	6.54684	0.931173	6.39302	3.81011	2.02168	2.45614	1.38112
TSPAN17	645	9.05758	7.61339	7.26035	6.66721	8.83207	8.061	5.55151	9.58684	9.27831	12.1685	10.4879	6.95379	7.09233	8.67031	9.10632	8.0336	7.75153	7.48409	5.72802	11.2221	7.97749	5.553	6.81521	5.71488	5.86823	8.50527	5.55322	5.17532	9.16669	6.11431	10.4795	7.67978	6.54	9.27132	6.71563	6.03125	15.0185
NOP16	646	10.44	7.98459	8.25547	9.39409	7.35476	8.52935	7.66239	6.59587	8.7221	10.0678	8.62329	9.15603	7.39064	9.71197	9.14203	8.62872	8.47748	9.75149	6.50663	5.23158	6.82391	6.97342	7.55042	7.68318	6.42511	7.56681	7.49765	8.24287	9.24052	7.34717	8.66583	10.6048	9.19838	9.00609	9.11879	8.61331	5.92693
CC2D2A	647	5.37261	4.91429	3.28654	3.7521	4.79826	2.70096	4.71822	1.6618	3.74379	3.53401	3.97598	3.63511	4.1808	4.99562	3.92948	5.37897	5.43608	4.79732	4.19146	1.34976	2.65067	4.12904	6.45561	3.74996	6.33664	5.88968	7.40501	4.35384	4.35211	5.99744	3.93552	1.61357	3.75214	3.24438	3.07801	2.29891	1.55972
RRM2B	648	5.38436	4.56017	2.5079	2.63811	4.95691	1.96344	3.37743	1.99634	4.5352	5.12034	4.44155	2.63167	3.92298	4.63117	5.30291	4.35034	3.60557	4.31311	3.52467	1.46867	2.30794	2.77464	3.86301	2.88952	5.70099	5.97924	5.05155	3.04461	3.89766	4.86607	7.2961	1.61395	3.41383	7.23179	5.33322	6.8407	4.99519
ZNF800	649	2.75724	3.15398	1.36506	2.738	2.34441	1.50398	2.73586	2.08977	3.27893	2.85497	2.06044	2.60872	2.15823	3.28573	2.88707	2.61502	2.71288	2.91103	2.1591	2.37104	1.94925	2.66082	3.72696	2.59161	2.06208	3.09115	3.08051	3.11597	2.86915	2.44804	2.72901	0.677982	2.0103	1.35638	0.791737	1.26302	2.78109
TNFRSF17	650	0	0.065285	0.039274	0.059898	0.033703	0	0	0	0.040394	0.043725	0.584272	0.071069	0.030543	0	0	0	0.03655	0.036548	0	0	0.037786	0.080735	0.033691	0	0	0	0	0.037193	0.034101	0.070923	0	1.72496	0.035431	0	0	0.031949	0.159556
SNX29	651	4.36852	6.35719	7.64029	6.30192	7.21419	6.96205	6.14519	7.03697	3.83577	2.99457	3.32065	7.34284	7.18889	5.18426	4.84671	6.0195	8.17381	8.13846	8.51711	10.5336	10.5065	6.44156	7.81472	7.5602	9.15889	9.25283	8.17091	7.6831	8.30146	9.06463	6.26808	12.1341	7.11433	9.07125	8.60147	11.0303	4.838
LMO3	652	5.20065	25.1257	24.7571	17.0037	95.7244	6.13208	23.5785	3.84064	3.80855	13.0424	11.4118	23.8959	46.4136	2.61674	52.34	19.9789	25.8852	18.3043	22.168	4.5548	6.24568	25.32	13.1955	25.6077	80.2582	8.30435	13.6569	10.8425	5.63781	60.3244	17.3413	20.386	41.7406	83.466	37.3596	81.851	6.24213
MRPS10	653	16.2336	11.7304	10.4458	13.0193	11.8644	7.88793	12.8871	12.285	12.7731	17.3274	14.4556	12.2759	11.2069	14.9183	14.2312	12.9288	8.26993	7.51533	8.15466	6.57151	6.60109	6.96702	8.74863	7.70546	8.36374	9.26368	10.0981	8.88563	7.87522	9.02645	14.0341	7.52041	10.3247	8.56965	8.60405	7.7806	15.6631
GUCA1A	654	1.8181	1.14943	1.87318	0.979153	1.8055	2.42655	1.37358	2.1935	1.3762	1.27229	1.96975	1.30472	2.33168	1.50723	1.29414	1.54595	0.838577	0.883605	1.60194	2.48727	2.16528	0.847957	1.1509	0.916724	1.30939	1.44305	0.836629	1.0951	0.761265	1.03734	2.98116	3.11782	1.99578	2.06698	2.07409	1.77612	6.04647
RSF1	655	9.06529	11.422	9.7587	10.556	11.1488	8.81397	11.3283	11.3053	9.1581	6.38151	6.60775	11.5407	10.6999	10.021	9.35036	11.1534	12.4255	11.816	12.3635	11.0781	10.2746	9.35139	12.3038	11.4131	18.0735	14.1162	17.823	10.7173	11.3499	15.4293	8.07132	7.99019	8.18883	9.11854	8.25207	9.90529	7.94875
VPS13D	656	1.94557	3.48242	3.03623	2.97266	2.91232	3.12268	3.42904	1.62833	1.65989	0.953909	1.24025	3.7867	3.047	1.94254	1.99419	3.10162	3.82589	3.69024	4.73418	3.00013	3.61217	4.15125	4.67436	4.17665	4.88991	4.05894	4.28704	4.47546	3.68368	4.11111	2.34796	4.10705	5.52651	4.09284	3.82929	4.70713	1.4151
CELF2	657	24.0043	37.8033	34.5439	30.4619	43.0442	21.3918	31.5281	31.8289	21.1471	18.1804	16.7291	36.4073	42.989	18.4712	29.0962	33.8766	30.7714	34.1	31.7976	38.1557	25.0725	28.91	29.0968	30.8433	50.5971	33.2454	37.7076	29.3532	34.3546	42.3289	25.927	49.0213	29.2371	65.5393	47.9804	56.4442	28.6772
FAM120A	658	6.53257	8.26895	4.56875	6.98743	7.25274	4.44389	7.78435	3.29681	7.22799	5.45819	6.1257	7.25112	5.65264	8.13555	6.46479	7.98168	6.95058	7.08104	5.54164	3.24607	4.11277	6.22596	8.83285	6.18148	6.38026	7.2421	7.66707	6.82947	7.9861	6.23427	7.34968	4.17242	7.22738	4.19165	4.75077	4.09563	4.53551
R3HDM1	659	5.52215	9.42761	7.03539	7.87796	8.69532	9.16658	8.49809	8.43748	5.17985	4.02204	4.04146	9.02956	7.56242	5.82258	5.82605	8.42928	9.87509	10.8244	9.11528	26.7253	13.666	9.43907	9.85506	13.0361	19.0206	11.2245	12.8053	8.90722	9.83718	14.0547	8.41937	8.557	7.15304	14.4204	17.4073	11.3391	15.686
COL9A2	660	2.52104	3.32139	4.92485	3.65722	3.52981	8.73267	2.5912	6.89713	7.5708	3.68078	36.2374	3.50521	5.1681	25.7722	3.07808	3.33511	6.80904	7.29701	4.33675	5.44389	9.20773	2.66256	7.13168	4.16084	2.86542	15.0083	4.12466	2.40827	10.5265	4.15193	8.72544	3.47981	3.35683	2.82696	2.99002	4.40751	2.387
KITLG	661	3.37189	2.91339	5.59658	7.93572	2.06522	6.68501	5.6744	77.7946	7.47085	5.49092	12.6844	4.88961	3.26256	10.9437	3.74346	2.46661	1.90925	4.71073	8.57066	321.263	16.6077	4.8205	2.19385	9.47452	2.39355	20.3133	2.56977	10.4119	5.13471	1.96511	7.27575	7.99099	15.8789	5.87054	1.46416	2.90965	679.032
ERCC8	662	5.62926	4.58516	4.76484	5.02803	4.22158	2.85728	4.74066	4.11158	4.81064	6.06269	5.15536	3.98789	4.66471	4.57378	5.43499	4.81096	4.7164	4.07346	4.74684	4.11876	3.49346	4.69581	4.66809	4.34802	4.07971	4.40456	4.39789	5.12962	3.74204	4.29732	6.05386	3.2686	4.99614	3.80884	3.94004	3.57006	8.49956
ADAMTS6	663	0.613102	0.857785	0.198748	0.264498	0.332903	0.496593	0.436276	0.179971	0.474234	0.289992	0.216114	0.337144	0.186727	0.707465	0.281867	0.716837	1.8099	1.57088	0.580351	0.369707	0.879129	1.25013	2.08345	0.704829	1.19817	1.04009	2.02658	0.911881	1.35904	1.04883	0.238658	0.058726	0.460028	0.717056	0.456672	0.298729	0.279957
H6PD	664	3.9289	5.48654	2.11611	3.34344	4.17073	2.51193	3.97	0.797955	3.1168	1.96754	2.73275	4.04917	2.25494	4.86443	2.70532	5.19365	6.98725	6.9623	3.9554	0.85303	2.77245	4.67781	9.4845	4.64905	4.50463	6.54724	6.76077	5.8813	7.08314	5.441	3.26056	3.19284	3.95758	2.89039	3.73954	3.09001	0.721028
VAMP3	665	10.8716	9.90315	6.52921	8.31363	10.5364	6.63401	8.51915	3.91372	8.14484	10.0903	14.6136	7.25462	7.65941	14.0733	8.09716	9.65258	7.89327	8.99348	5.8027	4.12306	6.92873	7.26857	9.23363	7.96152	8.27168	9.12898	8.30877	6.99027	8.52856	9.30144	9.95078	4.10216	8.47961	6.34961	6.15788	4.73468	5.20029
PER3	666	1.19295	1.70237	1.34621	2.28975	1.90722	2.27026	2.09464	1.5696	1.44001	0.677389	1.19541	2.33632	2.2192	1.71712	0.863452	1.50354	1.52108	2.0113	2.55981	1.26189	2.33653	2.62455	2.43899	3.99839	1.6773	1.73213	1.71508	3.15032	2.13858	1.65776	1.1749	0.658608	2.03879	0.950547	0.491897	1.05032	0.867955
UTS2	667	0.792117	1.17009	0.905492	1.35418	1.36458	0.713005	1.30556	0.956094	0.819793	0.660386	0.850273	1.42254	1.40632	0.984807	0.682462	0.981379	0.625142	1.26502	1.38938	0.771442	1.38046	1.37182	1.22162	2.65345	0.631532	1.07906	1.0722	1.85056	1.23966	1.09601	0.928824	0.397953	1.27961	0.537713	0.342087	0.804839	0.370761
TNFRSF9	668	0	0	0	0	0	0	0	0	0	0	0	0	0	0	0	0.006119	0.017877	0	0	0	0.037216	0	0	0.006116	0	0	0	0	0	0.01711	0	0	0	0	0	0	0
EPN3	669	0	0.039242	0.084575	0.064884	0.097392	0.10824	0.04554	0.052573	0.029215	0	0.190805	0.119819	0.102591	0.008185	0.030048	0.023912	0.043939	0.037983	0.106984	0.066058	0.174082	0.023863	0.008122	0.046225	0.082432	0.049127	0.034696	0	0.03233	0.051064	0.006106	0.033582	0.06187	0.093956	0.067791	0.032891	0.033398
SRD5A2	670	0	0.015746	0	0	0	0.018212	0	0.008786	0	0	0	0.00857	0.007367	0.065507	0	0	0.017511	0	0.010259	0.01863	0.009238	0.009869	0.008126	0.009299	0	0	0.03471	0.009093	0.008225	0.051317	0	0.009074	0	0.026804	0	0.007706	0.028862
LTBP1	671	8.26947	9.4153	11.3429	6.05684	6.82324	3.85891	17.8372	4.81546	17.8838	5.90895	10.8485	6.89565	12.4601	16.5733	5.59798	8.23178	13.8182	17.3663	28.2541	5.20474	4.01478	8.65185	17.1749	6.34583	10.5175	38.1139	15.4886	25.37	26.2793	10.3072	29.5204	0.857318	33.6181	0.5888	0.901435	0.514402	3.12664
RCN1	672	12.2447	9.99928	6.09528	7.51276	7.58946	5.45874	10.7552	12.783	14.1575	13.4611	14.8919	9.78623	7.16151	14.9356	11.2011	9.72738	10.1022	10.2296	9.42643	5.8568	5.66719	8.16076	11.8696	6.13906	6.47005	9.59231	8.83071	9.89918	8.41851	7.22374	7.06237	3.57229	8.618	0.563371	0.577706	0.556236	8.11949
ELN	673	4.82775	3.17575	6.18501	8.7263	4.28177	5.76439	4.9054	6.53824	6.64622	3.48342	11.5892	4.84016	2.65367	15.9276	3.1388	4.08767	2.52361	3.7375	3.37177	3.51025	6.58499	4.60332	2.69866	4.36275	1.90692	9.45961	4.33336	5.67891	5.33242	2.10573	9.15961	2.63164	4.81455	3.09509	1.3058	2.08071	3.12343
RFC2	674	33.2203	22.3737	17.8244	23.2412	18.0493	12.154	24.2275	16.0583	30.7379	32.0843	23.2167	20.9158	16.6158	25.229	22.2235	24.6957	22.7547	21.7462	20.7835	10.7385	13.5873	19.2553	25.2469	16.8483	15.4877	20.6368	20.7787	25.6646	21.4303	18.6088	16.2496	11.892	21.4108	9.84415	9.13998	8.69823	10.5212
ARID1B	675	3.5956	7.89507	8.566	5.56199	7.18134	12.2024	7.79314	4.29029	3.39441	2.0187	1.8131	8.85226	7.00085	4.61102	3.75976	6.46681	8.85728	8.54997	9.19053	9.75523	13.3593	9.04134	8.35317	7.62565	11.0302	8.80139	9.73945	8.33298	10.4456	10.2641	5.93938	11.4654	7.66507	8.68053	9.63564	13.4662	3.03482
CLPTM1L	676	11.0351	10.6262	9.87311	10.2171	10.3928	11.4605	9.33056	9.29675	11.3348	12.1836	10.1057	9.555	10.702	11.4583	10.5109	10.538	7.85655	7.96121	7.7868	7.46473	7.71859	6.51494	7.21852	6.93792	6.65703	8.91796	7.52645	7.78639	9.25645	6.77264	10.2964	11.0576	9.6813	8.91385	10.2269	9.93019	6.67398
NEDD4L	677	27.5234	49.0332	37.2316	54.9651	40.0803	30.7858	54.1403	28.257	26.9037	27.0744	16.4179	63.0841	41.2811	13.9301	38.7744	39.6357	54.5813	54.7554	51.471	41.8445	36.6333	58.4093	61.7344	52.9988	45.9621	28.7201	40.7143	63.5149	43.7527	48.7233	21.9211	56.9214	39.9423	38.198	21.7579	42.9797	27.2409
FOXP3	678	0.172099	0.286832	0.305099	0.115363	0.152315	0.52183	0.263822	0.26123	0.092933	0.059642	0.158224	0.134591	0.217425	0.212065	0.156119	0.09484	0.248415	0.27921	0.32397	0.202809	0.495337	0.264228	0.198023	0.194337	0.207371	0.247295	0.29698	0.285827	0.355349	0.155698	0.281304	0.475048	0.160333	0.195032	0.309543	0.238092	0.131002
PPP1R3F	679	2.41293	3.00939	3.6845	3.15465	3.44901	5.02506	3.0408	4.75438	2.92354	3.0447	3.15735	3.64422	3.26671	2.66558	2.9659	2.92212	3.21253	3.41395	3.21965	4.21592	3.87195	3.42204	2.87647	3.16875	2.57527	2.34572	2.91217	2.7167	3.25953	2.82541	3.95511	6.22906	3.59042	5.12319	4.58875	3.67559	3.96757
HEXB	680	6.93261	4.90825	7.39275	5.52375	8.87701	5.48253	6.31765	7.30906	5.79864	5.68396	9.38762	7.00878	9.70005	7.73962	6.78335	5.81831	4.48234	5.23867	11.4829	9.68593	7.46342	6.42098	6.10721	6.64592	5.11219	8.77248	5.80386	8.48395	5.80059	5.26728	10.5377	6.98283	12.4176	7.59971	5.27801	17.338	7.05237
PTCD2	681	2.50284	2.02886	1.71407	1.71647	1.72919	1.03541	1.76256	1.04627	1.78991	2.16727	2.50864	1.33651	1.62053	2.44593	1.78986	2.09141	2.66272	2.31791	2.33599	1.08466	1.73341	1.93	2.61727	1.87503	2.82465	2.87868	3.39431	2.36551	2.47384	2.76483	2.18893	1.00692	1.4364	1.45198	2.22667	2.39155	1.76669
KIAA2022	682	5.03815	7.05214	7.24354	4.85863	8.48831	5.7952	4.9702	5.68015	4.2531	3.47959	3.06402	5.9344	10.8048	3.70769	5.8871	6.97374	9.04443	8.09316	9.59323	11.019	9.89266	5.5697	8.43093	8.96737	13.8869	9.65317	10.9759	4.81414	7.70721	11.8693	7.4527	6.64353	5.75294	10.304	10.1968	11.7025	18.2093
JKAMP	683	6.88644	6.19945	6.17355	7.41608	5.7462	5.49211	6.54628	8.20577	7.0959	9.37218	8.70588	6.95744	6.82361	8.12614	6.30882	6.14722	6.66068	7.64454	6.77067	6.28099	5.79771	7.20742	7.27944	7.55895	5.65666	6.19588	5.44175	5.52907	6.99073	6.51633	9.4237	6.74374	8.19601	4.21169	4.91255	5.5049	12.8595
DKK3	684	20.867	23.5688	53.9149	22.5316	35.68	34.567	26.1631	30.2886	24.0303	24.917	37.4847	31.4125	39.3423	24.4453	30.2724	26.2071	35.927	33.5194	38.5985	60.5077	37.4733	37.5818	42.3621	29.8907	34.6271	42.4934	23.1555	32.7774	33.0005	33.9564	76.1461	55.9834	35.2392	41.317	33.6832	26.1656	89.41
ARHGEF5	685	0.070652	0.065009	0.023454	0.053898	0.08069	0.075292	0.037858	0.047445	0.048355	0.034856	0.208494	0.078162	0.012133	0.203298	0.06665	0.118914	0.087506	0.116438	0.051035	0.046234	0.037987	0.089899	0.100874	0.030735	0.079193	0.088487	0.050264	0.052673	0.088556	0.084135	0.079417	0.258011	0.084923	0.016705	0.034218	0.025555	0.063487
NFE2L3	686	0.63187	0.734138	1.87699	0.945809	0.952658	4.35844	0.463613	2.62147	0.881686	0.729379	0.952435	0.988257	1.43624	1.8058	0.760313	0.738157	0.295524	0.694041	0.650994	2.03079	3.95853	0.943557	0.328736	0.924984	0.48465	0.721416	0.513281	0.294684	0.669075	0.663861	3.01457	2.6879	1.40671	2.13479	1.78035	3.27349	8.81154
CCDC90A	687	6.60864	8.32923	4.7337	5.45129	10.2883	4.29582	7.21273	5.42658	7.11031	7.53244	7.02932	5.29505	6.38276	7.76233	8.34613	8.00026	6.81368	5.66546	5.79367	4.48443	4.32605	5.64482	6.06909	4.49875	8.10482	6.2906	7.3312	5.50358	5.20235	9.03301	8.47894	2.16513	5.78408	13.572	7.79156	4.95126	5.48242
LIMA1	688	3.42325	3.86763	2.7618	4.14047	4.62367	1.91175	3.60367	2.08653	3.28595	3.46744	7.27933	3.35634	2.78582	4.31297	3.95181	4.04461	4.79563	4.14919	3.5318	1.40129	2.69321	4.25168	6.12723	4.78786	4.80593	4.56557	5.33752	4.84824	4.06361	6.03198	5.89052	1.82446	3.54971	2.44542	2.41314	2.42841	2.04839
LETMD1	689	6.0199	5.85445	8.298	6.33671	7.28425	9.8675	5.48845	4.29146	4.55549	5.20626	7.22455	5.66512	8.55693	5.45067	5.82867	5.40002	7.01225	7.23229	7.53348	8.16705	12.2865	7.43577	6.10701	9.12933	10.5699	7.49396	8.33806	5.81037	7.31006	9.34183	7.06257	8.61131	6.49723	9.86207	12.4335	11.4796	6.92948
SLC4A8	690	3.85182	5.69709	3.47954	4.42061	4.42553	4.82009	3.73453	4.04696	3.6881	2.50366	1.80858	4.97385	4.90469	3.46192	3.49602	5.05187	6.15882	5.6784	6.14022	8.01569	6.63396	5.51657	6.87348	6.67728	7.30125	6.61733	7.56331	4.83885	6.22978	7.0425	2.98414	2.40948	2.19703	3.63421	5.45782	5.39295	1.71682
LAMC3	691	1.62607	2.31533	1.49842	1.08673	4.48504	2.59767	0.989814	0.636747	1.23667	1.4974	1.2475	0.854731	1.19239	5.57372	1.53239	2.32082	0.613208	0.713873	0.545262	0.497065	3.005	0.496436	0.561585	0.696244	1.40773	3.35782	2.10836	0.586506	1.468	1.45952	0.975613	0.842955	0.572346	1.33035	3.51287	2.21496	0.325377
PTGER3	692	0.201729	0.185664	0.54244	0.1741	0.52787	25.39	0.066028	0.169134	0.855071	0.167354	1.24698	0.189737	1.48804	0.212752	0.300091	0.149621	0.080609	0.216302	0.747372	0.286737	28.6499	0.147248	0.070289	0.765001	0.234823	0.268468	0.137818	0.448642	0.082912	0.139731	0.16201	0.353541	0.242539	0.262829	0.051644	0.051769	0.259165
TNIP3	693	0	0.009546	0.116265	0.044389	0.079385	0.201149	0.037246	0.398075	0.01165	0.025923	0.061749	0.073308	0.163829	0.059704	0.024743	0.009801	0.021669	0.010834	0.049926	0.617463	0.205763	0.060487	0	0.079078	0.350784	0	0.021331	0.055278	0	0.013637	0.047124	0.279704	0.041018	0.066224	0.044831	0.028284	0.465306
MAPK9	694	4.36526	4.72074	5.7741	4.8025	5.03499	6.22229	4.34016	5.2287	4.1803	4.19935	4.88014	5.89936	6.57193	4.38338	4.41587	4.54837	4.66094	4.95367	5.21568	8.17139	8.27133	4.82206	4.42614	5.88495	5.30841	4.43124	4.5646	3.57539	4.39783	5.10301	4.64071	6.7718	4.115	6.45859	4.48002	6.23383	7.44361
COL23A1	695	0.036566	0.156754	0.144761	0.12838	0.393443	1.50091	0.017405	4.31997	0.137928	0.049486	1.93901	0.030575	0.043564	0.912672	0.094626	0.141598	0.010483	0.094198	0.116065	7.26586	2.80246	0	0.054583	0.153321	0.071972	0.300537	0.122853	0.053921	0.12662	0.020204	0.214989	0.083841	0.080884	0.127389	0.077996	0.102777	2.89414
BCAR1	696	7.7485	7.97214	7.25721	6.52622	8.71274	11.4928	7.35618	6.99399	5.86839	5.87041	6.58631	7.93309	7.71627	8.49237	6.52715	8.08834	8.72128	9.16708	8.86651	7.325	11.2332	6.28886	8.46936	6.04981	6.23804	9.78166	8.42424	8.15315	11.134	7.23895	8.87991	10.6778	11.5448	10.3741	9.17168	6.41705	3.58435
FAM160A2	697	3.78835	4.2674	4.93945	4.23781	4.61111	5.31789	3.35615	3.8548	3.19231	3.48562	3.01138	4.37468	5.10922	2.88723	4.00155	4.09811	7.23495	7.43084	6.35986	6.7808	7.5263	6.55556	7.44918	6.22563	6.0337	5.95278	6.86078	6.80484	7.27783	6.21192	5.85169	9.55904	6.63049	9.65769	9.49447	8.50846	4.78543
HERPUD1	698	12.5777	11.5988	14.7728	11.9841	18.7825	11.5697	11.2375	12.1469	10.204	12.4632	19.6204	10.5676	15.1672	15.8706	11.3669	11.847	9.00583	9.58558	12.8066	16.0965	16.4597	10.2754	8.8636	13.8503	12.761	11.2779	11.0595	10.9902	9.20443	13.7253	17.8146	14.605	14.238	14.925	14.0578	11.1165	15.8151
HOMER3	699	13.5319	12.2394	12.0576	17.5346	11.4238	18.5542	14.5962	9.04189	11.6162	17.7368	11.3007	13.7007	9.63948	11.9809	13.8221	13.8342	10.4366	10.3381	9.53273	5.15985	15.6845	10.1435	10.2925	9.46002	6.11658	8.34759	8.10054	13.7431	10.391	6.98352	10.9544	16.2353	18.8766	7.48268	6.95058	6.07347	5.48413
RAD51	700	10.8865	7.98449	4.67882	8.86557	5.24152	1.23851	9.37693	3.33222	9.03819	9.11974	5.86275	6.98847	4.14532	7.14932	6.93962	7.71376	7.14274	6.33948	6.26419	1.26352	1.13062	6.70646	9.35948	5.67248	4.91468	5.39044	6.72295	9.53549	6.333	4.44642	2.99805	0.785201	6.36256	0.206636	0.363165	0.29296	0.354265
POLQ	701	1.4508	2.33181	0.48317	1.3837	0.786701	0.384989	1.55287	0.435664	1.17333	0.984223	0.687538	1.68526	0.585962	1.02537	0.795091	1.67847	2.19541	2.20986	1.36961	0.265619	0.292819	2.21489	2.85568	2.33564	1.54148	1.46791	2.64784	1.84577	2.0053	1.77963	0.594686	0.187757	0.843739	0.042831	0.04866	0.079597	0.033169
PIK3CB	702	4.73592	6.3782	5.04552	3.63922	6.30425	3.74603	4.96155	3.4197	5.05679	5.13448	3.31677	4.52201	5.59492	3.94275	6.16385	5.49881	5.16668	5.90326	5.01972	4.05412	3.78529	3.74557	4.71198	3.62285	6.67094	4.99123	5.35681	4.55039	5.24348	6.39773	4.51977	5.4429	4.95108	6.34363	8.47961	8.63182	7.17552
CYBA	703	35.5287	22.227	19.4662	18.7991	34.1201	22.2411	19.3754	15.2703	43.3934	52.3163	79.6602	16.8949	14.2251	46.78	35.8952	25.0901	14.9027	15.9254	8.00838	4.26138	10.0617	11.92	12.5254	10.1312	7.18607	15.7313	11.211	16.7042	16.6248	10.2795	19.4371	17.0473	15.5644	11.5236	17.3307	8.16723	6.71915
THOC3	704	4.583	2.39417	2.49985	2.67779	2.06195	2.11949	2.52086	2.02334	3.0923	3.92919	2.35338	2.36475	2.20634	2.91946	3.15475	3.01751	2.32338	2.07405	2.30455	1.31618	1.72665	1.60553	2.58928	1.69038	1.68395	2.4182	2.64897	2.82396	2.6016	1.75926	1.95395	1.86619	2.46082	1.67141	1.70959	1.26588	1.25572
HEBP2	705	12.7737	10.5086	8.30249	8.33888	11.4858	8.71415	10.7334	7.03313	16.5025	21.767	20.5419	8.48274	8.39811	13.3576	14.4358	10.2991	13.0123	12.4479	12.9588	6.63539	14.8457	9.71565	12.6029	8.39095	11.5632	14.4426	10.7371	11.2075	12.4154	12.2488	24.0292	5.49179	16.344	20.591	13.1876	12.9782	54.0493
MPHOSPH9	706	3.27324	4.18882	1.49189	2.4481	1.85924	1.10029	2.6393	1.05824	2.97735	2.0158	1.52637	2.86154	1.48093	2.16556	2.13764	3.03548	4.18339	3.84072	2.49251	0.922762	1.07185	4.21457	4.66373	4.1307	3.25479	2.46984	4.66914	3.1289	3.35469	3.08235	1.21078	1.15668	1.92033	1.07963	1.0213	0.984635	0.52954
PLEKHA5	707	3.65632	4.33495	3.02549	3.05865	3.36588	4.31529	3.19156	2.05832	3.84414	2.03846	3.15783	4.47441	3.70944	6.06437	2.72886	3.53864	4.04796	4.05354	2.90704	3.15304	4.82924	4.32535	3.86834	4.49826	5.41095	6.90396	5.64394	2.44401	4.86603	5.35005	4.5835	3.40649	2.37422	4.53496	3.93362	5.18334	2.75225
PRSS8	708	0.018292	0	0.04402	0.017014	0.019147	0.042897	0.017966	0.041389	0	0.049681	1.16126	0.040374	0.017352	0.095915	0.023709	0.037565	0	0.08277	0.010123	0.043586	0.064988	0.023247	0	0.043807	0.024999	0.116027	0.02044	0	0.116239	0	0.022654	0.192062	0.040257	0	0	0	0.067677
SIKE1	709	9.3148	7.82849	6.22748	7.63684	7.91085	6.33065	7.23172	7.98304	10.2298	10.1189	11.6981	7.27182	8.19246	10.628	9.27743	7.37345	4.70413	5.94516	6.29634	4.65773	5.72875	5.51721	5.8969	7.1252	5.77086	7.15907	6.46066	6.00979	5.34328	6.26571	9.22142	6.01961	6.75961	6.14705	6.16455	7.09466	13.3148
RRP12	710	4.36638	4.69684	4.4123	4.26649	4.05806	3.55882	4.44385	2.4962	4.73249	3.31136	2.70011	4.44427	3.374	4.91188	3.66168	4.56823	5.68115	5.6436	3.77192	2.92881	3.5312	3.6295	5.70112	3.54853	3.91705	5.91901	4.89137	4.88621	6.39282	4.05865	3.50123	5.92131	3.80481	4.04058	4.79002	4.95608	1.72855
FNIP2	711	3.46908	4.68792	7.20076	6.41501	6.28714	4.56688	4.83894	8.44272	3.88349	3.77713	4.79628	7.43018	8.20353	4.38643	5.08999	3.79075	3.30036	3.58227	5.35598	14.5178	6.36192	4.26817	3.12141	6.54476	4.33285	4.00048	3.04433	3.39255	3.14482	4.018	4.10884	6.57406	4.62303	6.87513	4.18421	8.69778	12.8819
MSMO1	712	59.4714	50.025	46.6646	51.7406	51.8221	32.873	50.3137	85.7154	49.1179	64.566	43.8604	45.1289	54.564	46.7891	62.2218	46.4353	46.3989	52.3751	59.1849	106.202	54.7288	65.2192	67.9677	67.8526	56.6066	46.9886	58.4998	67.4551	44.1796	71.7881	72.6513	45.0216	46.0158	38.6886	17.4404	29.7657	156.746
TTC17	713	3.57664	4.9408	4.28938	3.94169	4.37941	4.63511	3.82254	3.40732	3.66479	3.22782	3.54404	4.78215	4.90886	3.78751	3.62636	3.96275	6.06879	5.94887	4.44117	3.71399	4.64794	5.87848	6.02824	6.54379	6.18742	4.40778	5.49891	4.08433	5.42058	6.21463	4.03016	5.35618	4.27708	5.46877	5.86684	5.96468	4.06288
ALX4	714	1.19312	1.51327	0.739334	0.186718	3.11275	0.596121	0.079918	0.143598	0.970097	1.2575	15.2411	0.166203	0.6829	3.48487	1.12282	1.54588	0.477221	0.704185	0.091239	0.082842	1.00762	0.059845	0.282939	0.150364	0.608871	1.97906	1.4859	0.044111	1.6075	1.31868	0.707605	0.153953	0.070209	1.4568	1.56097	1.10782	0.062225
FSTL4	715	0.085789	0.218269	0.215273	0.099489	0.262425	1.67089	0.125928	0.175056	0.219687	0.142409	0.239758	0.229549	0.44459	0.439775	0.062388	0.175212	0.249399	0.597783	0.507368	1.51474	4.16023	0.250841	0.122812	0.362871	0.241	0.794606	0.298076	0.1679	0.473576	0.117724	0.250533	0.356432	0.264668	0.268351	0.050931	0.1194	1.50417
FOXN3	716	13.9573	14.1651	12.9419	16.788	13.8687	10.2285	20.1747	10.4249	10.2298	8.93511	6.95755	15.3559	15.1097	12.4261	11.7371	13.328	16.0116	14.2413	25.9148	12.5396	14.8169	18.7888	17.7695	18.7748	21.3884	18.9735	21.8982	28.9927	15.448	19.7559	7.86158	7.37395	13.7491	10.6775	9.92194	9.04389	7.02169
C6orf186	717	0.321082	0.320497	0.338076	0.220536	0.65434	0.237472	0.142586	0.492395	0.18384	0.249313	1.89517	0.268329	0.213458	0.891787	0.217686	0.260933	0.223975	0.284391	0.133051	0.242268	0.406442	0.206117	0.084708	0.311848	0.221648	0.577035	0.271992	0.119537	0.288317	0.488412	0.149542	0.353981	0.128641	0.306829	0.234516	0.240982	0.10063
AKR7A2	718	26.2582	14.0552	16.501	22.2857	16.157	9.76036	18.7931	12.0345	20.8184	25.1265	25.2638	14.5684	16.373	25.134	17.6659	19.031	18.2229	21.0853	21.8533	9.87318	11.7132	17.8273	19.5914	13.8975	13.2286	21.8037	16.7142	27.7735	22.0508	14.787	19.5631	10.737	25.1876	8.18054	9.90891	7.37214	6.1062
MRTO4	719	16.9459	12.5084	15.136	14.1859	11.5832	9.67774	12.9796	10.0472	15.954	17.2949	14.3523	12.5998	11.3011	16.3857	13.6089	14.0012	10.2125	9.63814	9.22714	8.17635	8.44642	8.18723	10.194	8.02068	8.52218	9.56265	9.45247	9.01922	9.94787	7.74405	15.7547	13.7977	13.3845	13.1527	12.2835	11.8021	12.1595
NNAT	720	656.837	914.703	2559.27	1772.9	1233.74	4373.9	1587.08	1730.04	1775.01	1258.96	1760.36	1907.8	2687.08	1155.72	1146.47	835.794	824.931	1247.77	2629.96	2001.92	3554.19	1414.14	625.652	1901.19	611.895	1136.37	498.929	1926.92	1254.11	618.483	1829.36	3139.02	3638.7	755.172	1102.96	858.009	1547.22
USE1	721	23.6388	18.0444	20.7691	19.1184	19.0439	24.2029	19.9141	22.364	22.8793	29.2851	26.6101	21.6866	16.4356	21.1281	25.132	20.9622	15.0716	16.6141	13.8314	11.2587	12.4763	11.5544	13.256	9.35881	10.5867	13.0166	11.8374	15.7169	14.455	12.5134	15.4059	20.0569	23.7563	17.5937	18.0569	14.812	10.5795
MCF2L2	722	0.963755	0.824458	0.764468	1.07919	0.783473	1.00316	0.984147	1.02292	1.10577	1.02487	0.949647	0.822326	0.995832	1.16299	0.901374	0.781201	0.343355	0.482621	0.754722	0.827916	1.28425	0.594292	0.387032	0.937061	0.40434	0.758732	0.440632	0.662532	0.461128	0.438228	1.2075	0.892466	1.26672	0.520592	0.434157	0.481694	1.9988
NRIP2	723	0.615213	0.872915	0.625363	0.403509	0.778147	1.30032	0.49862	0.143484	0.397552	0.639377	0.707542	0.74873	0.590824	0.596828	0.476727	0.649009	0.936573	0.91246	0.732399	0.743555	1.8626	1.02804	1.29254	0.857748	1.07701	0.749739	1.33098	0.471564	1.05195	1.09008	0.474019	0.492866	0.396885	0.780783	1.11206	0.592502	0.136027
LAMA3	724	0.131438	0.551748	0.168296	0.215128	0.171382	0.084832	0.19703	0	0.155559	0.062416	0.133558	0.416715	0.080994	0.073024	0.123735	0.392325	1.75781	1.63019	0.277735	0.047125	0.125288	1.50192	1.87413	1.05203	0.6514	0.14719	0.773224	0.716641	0.879245	0.942289	0.073456	0.071079	0.110173	0.039618	0.041949	0.055562	0.052888
MUDENG	725	13.2633	10.7433	9.22006	11.2323	10.3173	6.62438	10.1049	10.2566	11.6892	14.064	10.939	10.0702	10.976	13.5123	11.8981	10.5543	5.63772	6.93853	8.13048	6.97164	8.26307	6.11495	6.32249	7.88825	8.27523	8.39818	8.03523	7.07407	7.02894	7.70305	12.1063	7.2612	10.9942	7.41445	7.44236	9.1854	11.8943
ANAPC4	726	3.17437	3.08779	2.36228	2.63247	2.41173	1.84413	2.73977	1.80463	2.90365	2.88198	2.36611	2.56531	2.40557	2.66844	2.40369	2.72102	2.51203	2.25482	2.31048	1.35098	1.79709	3.2233	2.5887	3.02406	3.33988	2.2604	3.16083	2.34731	2.14697	2.94123	2.8309	2.12107	2.57792	2.18596	2.6252	2.23925	3.25943
KCNQ1	727	0.333076	0.363726	0.411489	0.325036	0.59015	0.287404	0.325283	0.19974	0.265124	0.176438	0.474466	0.259654	0.285822	0.683113	0.313288	0.264494	0.259921	0.235446	0.296338	0.150404	0.400873	0.223417	0.202936	0.361107	0.276936	0.430981	0.362035	0.300141	0.419488	0.304646	0.291076	0.342334	0.242119	0.332381	0.505649	0.403511	0.213882
TRAPPC3	728	17.2418	12.7771	17.575	12.606	14.5138	16.8108	12.05	13.553	16.0263	18.7324	18.4869	12.7876	14.4763	15.9946	15.6684	15.0466	10.1443	9.99959	9.656	12.4439	13.1235	8.11495	9.87676	8.21124	9.59913	11.2442	9.72197	7.81623	10.0277	9.64818	18.6022	17.1307	14.682	15.1733	13.8839	14.3628	16.1581
THRAP3	729	43.86	53.5938	46.7031	50.0677	47.5405	41.5031	58.0714	42.3909	46.379	32.9681	29.9124	51.5953	39.8369	45.1138	40.7434	49.026	52.8709	44.8123	39.492	29.7839	30.804	33.6242	44.5613	34.7875	43.9294	41.759	50.4114	45.4282	43.3005	44.0114	27.7641	29.884	34.1093	34.4943	31.3612	33.0493	16.1999
PHPT1	730	41.7059	25.808	35.0541	32.806	29.0969	33.9032	32.6243	47.7601	42.3979	46.523	51.0388	31.5101	30.7841	42.1761	37.7218	30.5646	20.2679	19.8856	23.2118	26.3847	22.2279	21.6315	19.0831	18.0878	13.8799	22.1677	17.4163	25.961	23.809	15.5828	37.0553	33.5662	38.9792	31.0432	26.4704	21.4883	35.912
ENTPD2	731	1.12831	0.896576	0.247479	0.07614	0.626475	0.716746	0.588041	0.061252	0.376469	0.333242	0.459335	0.525727	0.457667	1.70483	0.476624	1.60123	1.2944	1.03131	1.26989	0.049206	0.797736	1.99989	3.15221	0.695005	1.13337	4.08611	3.47545	2.16415	2.06195	1.69443	0.354034	0.254979	0.702928	0.224745	0.434651	0.121562	0.05082
LY75	732	0.07959	0.095005	0.070168	0.088027	0.161325	0.08486	0.078121	0.038839	0.074755	0.11102	0.523641	0.084933	0.093931	0.244961	0.080309	0.058752	0.060093	0.047275	0.058836	0.033697	0.113628	0.121717	0.038457	0.140546	0.112502	0.172473	0.116004	0.13472	0.046513	0.122852	0.056817	0.107385	0.099376	0.099504	0.088375	0.053449	0.161178
ARID4B	733	9.98218	12.8127	10.1111	11.0039	11.2426	9.59477	12.2903	8.66582	10.4172	10.0449	9.17783	11.3576	10.4912	9.61515	11.1124	10.3491	8.56779	8.70575	8.71465	4.40248	6.6311	7.97656	8.65706	8.18528	11.0149	8.63527	9.79897	7.36202	8.01876	9.24902	11.1268	8.44407	9.60356	9.16881	9.82414	9.47623	10.4204
OPN3	734	6.96923	5.30969	3.91415	6.09377	5.24213	2.86025	5.56298	7.57509	6.9678	8.07893	7.60188	4.94302	4.55816	8.11167	6.55502	5.3531	4.14741	3.66686	4.2661	3.35499	2.25219	3.72746	4.89436	4.24876	3.33387	4.76952	4.11498	6.13931	4.0136	3.82551	5.16324	1.86748	5.15937	3.19844	3.12342	3.34565	2.12669
SDCCAG8	735	10.1456	11.1346	6.25189	6.5979	9.03885	6.59266	7.45575	5.3046	7.70323	10.7216	6.35559	6.06024	6.78655	6.11043	9.7617	10.2611	8.91996	8.34092	6.73884	4.61098	7.12095	6.47935	7.87473	6.19344	10.7228	7.83389	11.3018	6.54779	8.30118	10.6003	8.47992	5.7636	7.95646	13.1599	16.978	17.3778	6.2497
PTPRN	736	1.13307	1.55375	3.18379	0.906478	2.26449	4.3153	0.662941	3.29955	0.958166	1.05352	1.153	1.5779	2.78732	0.989999	1.45646	1.62479	1.64352	1.47459	2.10458	5.87995	4.24361	1.45172	0.594577	2.31861	1.78115	1.96065	1.5975	0.467178	2.3977	1.78159	3.48522	6.12405	1.23187	5.25938	5.32885	5.4496	3.53602
HHAT	737	1.86192	1.16479	1.12095	1.6625	1.25689	1.43164	1.56541	1.06044	2.21732	1.84638	3.22729	1.40867	1.05014	3.16126	1.28817	1.36496	1.15371	1.46002	1.06285	0.483873	1.28114	1.32981	1.66021	1.28184	0.991354	2.33004	1.35987	1.5059	1.90105	0.883449	1.16859	1.70964	0.790616	0.18167	0.14128	0.671012	0.368604
KIF1B	738	25.5375	45.2063	33.3178	30.1808	39.5411	38.8469	31.7017	33.9462	22.2191	15.5581	12.0035	40.2502	39.0057	22.3974	26.7488	40.4004	53.1208	47.2934	46.166	65.9839	60.7085	36.4519	58.6407	44.0693	64.8599	47.6225	59.9386	35.3725	46.141	61.9611	27.1644	35.7675	29.4181	42.2207	42.0546	58.1977	21.1357
FOXC1	739	4.9479	5.51815	3.85631	2.32757	19.9436	3.78311	2.13541	1.56137	3.5677	5.29781	39.5313	1.69848	4.04683	10.4653	6.72585	5.89728	1.29339	2.0084	1.12053	0.904017	5.0347	0.663425	1.13924	1.73022	5.64892	4.38785	6.84457	1.06643	3.09077	7.02173	3.73397	1.30748	1.02272	6.10888	3.81677	3.4479	1.41366
TBC1D22A	740	2.21179	2.08995	2.44913	2.6686	2.39787	2.99098	2.55437	2.90976	2.11715	2.18621	2.56458	2.63269	2.04978	2.92996	1.88291	2.54187	3.5089	3.47051	2.81836	3.26275	2.89971	3.06494	3.26499	2.82264	2.58422	3.06275	3.41854	3.28288	3.64568	2.96721	2.84048	3.26577	2.86398	3.12448	3.38977	3.1788	1.75059
SYNE2	741	6.77513	21.0557	4.50492	7.38674	10.2842	3.94083	9.53581	3.95043	3.978	2.85346	1.52706	14.4777	5.74997	3.68234	5.85769	15.9575	32.1007	27.4643	13.6071	8.5341	5.78415	21.0554	42.8352	18.4019	36.13	15.9393	36.736	17.5298	21.584	35.3024	3.70029	6.21022	6.78035	12.074	11.4265	10.5518	1.73672
PLEKHH1	742	0.913041	1.62905	0.59411	0.750549	0.760431	0.939998	0.83642	0.620093	0.820318	0.616393	0.604302	1.27849	0.777911	0.899239	0.780449	0.974814	1.99729	1.90955	0.781541	0.77413	0.859537	1.95023	2.212	1.74418	1.17722	0.913117	1.83824	0.902757	1.65828	1.43134	1.04107	1.46631	0.951039	0.839608	0.864243	1.2745	0.869953
ATP9A	743	33.7397	46.5441	83.1287	45.8199	67.5251	101.334	43.722	51.6023	31.0678	26.0058	30.269	58.9039	91.0691	34.8727	41.2927	45.1225	39.7363	41.1582	80.0522	121.515	141.865	45.8166	31.4937	63.4438	71.8753	65.2984	49.3776	39.2623	45.8507	62.0854	59.7551	91.8815	52.6568	76.6614	49.5711	86.133	86.9765
SPO11	744	0	0	0	0	0	0	0	0	0	0	0	0	0	0	0	0	0	0	0	0	0	0	0	0	0	0	0	0	0	0	0	0	0	0.00248	0	0	0
CBLN4	745	0.358053	1.65632	1.13352	0.321778	5.04861	3.76088	0.890266	0.256542	0.523229	0.486003	8.04024	0.46064	3.71888	1.78559	2.04029	2.00701	1.60833	1.05428	1.57435	2.64803	3.04085	0.57576	0.85983	1.12708	5.90932	1.12071	1.70197	0.307262	0.656778	4.99895	3.2105	3.11831	1.73142	4.1499	0.924506	2.31469	13.6733
CHRDL2	746	0.011465	0.022933	0	0	0.011839	0.206559	0	0.025942	0.089604	0.01557	0.02975	0.025306	0.021751	0.18019	0.014861	0.035159	0	0.1428	0.015146	0.040885	0.25638	0.014571	0.046366	0.004082	0	0.072396	0.06371	0.026669	0.29077	0.012627	0.310469	0	0	0.009826	0	0.06795	0
FAM168A	747	21.6204	33.878	38.5398	29.8042	36.3682	39.0915	29.7616	19.4739	22.6303	18.7414	18.5869	38.4031	40.4316	20.413	25.8368	30.9533	40.6369	40.8058	42.6554	42.8249	54.622	34.1212	37.294	38.199	44.6604	39.6898	39.6739	35.2403	39.4408	44.1071	28.1991	50.2542	31.3706	41.4645	43.7308	45.4223	22.3099
RELT	748	1.28498	1.41875	0.936672	1.13658	0.976899	1.5461	1.34015	0.944569	0.955248	1.30458	1.13583	1.45569	0.917278	1.12821	1.43636	1.39661	1.80763	1.67266	1.08161	0.908074	1.66848	1.53259	1.94282	1.34848	1.1658	1.2668	1.49362	1.48349	1.81475	1.50841	1.3184	1.81104	1.32131	0.90639	1.1791	1.16842	0.662875
GALC	749	4.58415	4.25704	6.38907	5.46418	5.43631	4.96291	4.76547	5.44865	3.97217	4.03085	6.3478	4.79805	6.95266	5.95697	4.87172	4.18818	4.52099	5.05837	7.11	7.19283	6.89406	5.26241	4.60311	6.9418	6.10565	6.40638	5.08475	5.6372	4.65377	5.34387	7.2129	5.81017	6.58539	4.8779	5.06071	5.6601	9.79133
NOP58	750	21.8633	17.8273	15.67	14.789	14.7021	11.9894	16.9484	13.7121	25.5369	24.6568	19.5436	15.6178	12.8254	19.816	19.7559	16.6732	10.5854	9.18718	8.62275	5.19335	7.22401	8.97838	10.6381	9.65466	11.1959	9.17362	13.7764	6.77524	8.48858	11.3272	14.524	10.3683	11.147	10.4044	11.5482	9.33136	15.5305
C1orf144	751	33.5347	24.9073	24.3262	33.4578	21.3054	19.8595	29.7161	31.2621	33.6225	34.3807	35.7465	27.9971	21.2734	34.4976	27.6277	27.4139	22.1766	21.4977	24.1574	18.9313	15.108	21.7196	22.159	21.5846	15.5236	23.8727	19.8942	32.2509	22.194	17.8785	23.4324	17.7745	33.3443	13.2366	14.9438	12.7834	14.2854
KCNH2	752	2.42446	2.94391	5.53243	3.88791	3.407	9.62336	2.99024	8.51264	2.26719	2.10601	2.26629	5.34105	4.52524	2.85036	2.29294	3.67353	3.2854	3.62075	4.09176	10.5618	9.65268	4.2592	2.83923	4.61605	3.30761	3.93895	3.86136	2.8686	4.11532	3.35053	1.73426	10.9111	3.04205	9.48021	6.21238	4.85206	3.2693
CUL1	753	40.7884	42.2429	30.029	29.1075	38.0121	26.7382	34.574	23.8424	32.2368	34.9413	27.8529	33.591	34.0031	28.3496	37.2192	41.6526	36.4514	34.6344	30.8228	22.2072	26.2857	24.276	34.4157	25.0259	33.5511	32.0242	36.0317	27.5326	33.3082	36.0673	27.5669	26.837	29.1193	26.1127	25.4704	28.2372	18.397
FAM114A2	754	3.91684	3.40199	2.38792	3.17661	3.2142	2.06699	3.29515	3.14146	3.71508	3.66948	3.3579	2.97404	2.92996	4.16163	3.35038	3.33706	2.23857	2.28718	2.36469	1.58993	1.39474	1.97369	2.3542	2.27813	2.28189	2.49268	2.81033	3.14245	2.26526	2.4511	2.83659	1.75549	2.54274	1.75178	1.62847	1.96786	1.93564
CYFIP2	755	14.8598	20.5911	27.9126	19.6321	24.9995	23.8548	19.3899	22.3888	13.7399	11.9106	10.0166	21.747	27.775	16.085	17.5787	20.4959	21.7797	22.8687	26.797	39.5363	30.7165	20.4248	17.6563	22.3533	27.4069	25.4241	23.5326	22.401	25.4052	26.6422	22.7077	29.7003	20.5261	33.4795	35.5984	45.9924	20.8094
TAB2	756	17.0327	19.4067	12.624	16.7838	15.6558	9.23864	18.1773	14.8716	17.1633	14.1872	15.8515	16.8271	14.1974	21.2239	14.8893	17.7043	24.1072	24.708	20.6162	13.3142	11.7867	18.7243	25.6851	19.0609	22.7391	24.1063	24.6028	21.7086	24.9251	22.5425	20.9385	12.2771	20.0275	12.8713	11.7895	11.3609	13.883
C6orf72	757	15.7205	13.2069	9.25626	11.8751	12.9749	8.83529	13.3083	7.64095	16.1501	13.6493	19.7139	10.1528	11.1836	16.8413	12.8421	12.3087	10.6802	11.177	10.0884	4.8537	8.84445	9.27641	11.5928	10.0212	12.0092	13.6508	12.6204	10.4063	11.1033	11.3561	11.2614	5.1159	11.0611	6.32611	6.44774	6.03634	8.15965
EIF2AK2	758	4.57013	9.40122	4.05394	6.48739	5.71837	5.46585	7.79249	4.00796	4.72277	3.37112	3.30795	8.63883	5.48481	5.02034	4.32353	6.82264	9.46978	10.8639	9.22839	7.16742	7.3056	10.3977	13.0785	11.7825	10.2739	8.43588	11.5571	10.4156	8.9503	10.2139	6.78071	5.33358	6.94226	4.99196	4.46483	4.53065	9.33117
USP36	759	2.0097	3.09237	1.44873	1.73606	2.14919	2.86213	1.81544	0.819138	1.92081	1.36895	1.376	2.43255	1.8429	2.02859	1.67075	2.74465	3.89468	3.91385	1.85146	1.43226	2.76077	2.47972	4.06726	2.40487	3.59156	2.90869	4.25154	2.22228	4.38184	3.79959	1.59184	2.66332	1.72397	2.56344	3.35859	2.68437	0.581807
MLL3	760	1.8359	6.49233	1.89238	2.66461	3.793	3.42503	3.4083	1.50692	1.03474	0.730958	0.502334	5.56813	2.74537	1.40926	1.58916	4.69282	7.10065	6.49383	4.60786	3.02944	3.84338	6.34781	7.64136	5.69024	9.77341	5.10783	7.75695	3.83986	6.50116	6.99109	3.30449	6.74545	4.52776	12.383	8.89903	9.04494	2.46752
MCOLN3	761	0	0	0	0.010126	0.005621	8.6e-05	0	0	0	0	0.014124	0	0	0	0	0.005589	0	0	0	0	0.006475	0	0	0.006518	0	0.005677	0.024329	0.012661	0	0	0	0.01908	0	0	0.005786	0.005401	0
CCDC85A	762	1.56636	2.08101	4.28813	1.98305	3.97055	5.36156	1.47544	1.26667	1.10943	0.870938	2.17126	2.33547	5.50797	0.943554	2.03227	2.22315	1.8868	1.21361	3.63828	3.48506	8.07007	1.59809	1.21304	4.0168	4.62336	1.99689	3.04288	1.02778	0.976798	4.17683	3.59775	4.9456	3.78175	10.1765	12.2225	1.85761	11.1975
PUM2	763	39.1443	40.9883	25.1927	29.977	32.6253	20.8442	32.4969	21.5178	35.3005	31.1708	24.1497	31.5025	34.0072	31.3365	33.0194	36.4954	35.6664	34.1502	34.8822	23.3388	24.8212	30.4615	38.9307	34.3355	43.5095	38.6819	43.3884	32.4027	34.2741	39.8763	30.995	29.6124	33.8172	40.3648	39.8257	41.7645	30.576
MRPL43	764	14.0217	10.2483	12.2195	11.7093	11.8178	12.8611	11.413	10.504	12.7037	14.6596	14.3686	9.7102	11.2395	12.1144	12.1134	11.4354	14.4102	14.7276	13.3253	14.5315	14.559	13.6253	14.9793	12.1184	10.9938	14.4331	12.1414	17.3861	14.1814	12.5331	14.256	12.2439	14.9271	15.2557	14.0237	11.2641	9.86942
ITIH4	765	0.059101	0.128223	0.031918	0.037172	0.046303	0.184831	0.038815	0.007552	0.049354	0.043271	0.068131	0.054713	0.027102	0.036976	0.025496	0.06032	0.301183	0.389869	0.051972	0.155019	0.182437	0.369325	0.353533	0.224031	0.29522	0.062385	0.280765	0.05357	0.238117	0.132336	0.045306	0.138105	0.058667	0.283472	0.14853	0.049192	0.010365
ITIH1	766	0	0.008021	0.009651	0	0	0	0	0	0	0	0	0	0	0	0	0	0	0	0	0	0	0	0	0.009474	0	0	0	0	0	0	0	0	0	0	0	0	0
C4orf27	767	34.0404	25.4905	25.9245	27.3617	24.5421	17.5027	28.3122	21.9977	37.3735	42.5192	32.4557	22.8067	25.8855	28.9517	32.3237	25.4772	15.6546	17.599	20.1579	15.3081	14.4738	16.3275	15.5426	18.6061	17.7879	18.1486	16.605	19.3143	15.9874	17.5035	26.0626	15.9754	23.0297	14.3636	14.1733	15.037	35.3843
ZFR	768	36.7151	32.2601	32.0199	33.5458	31.5744	23.2691	34.6508	29.458	32.9033	30.7055	28.7304	30.3126	34.7304	30.3618	35.4214	33.0716	32.8296	30.3878	38.8147	31.6134	28.4224	32.6075	34.1481	33.5046	37.0955	37.3923	35.7192	37.3045	30.5859	34.9448	29.8805	22.9608	30.1417	26.184	25.1231	27.6342	35.4823
ZNF280C	769	3.11517	3.22323	2.20454	2.8954	2.08375	1.17513	3.19641	2.25564	2.35749	1.91529	1.3941	2.74342	2.46032	2.85981	2.15263	2.5671	4.15773	3.9304	3.33322	2.00215	1.77998	3.68455	4.25125	4.21795	4.23976	4.05296	4.12055	3.22698	4.17484	3.99619	2.31034	1.32557	2.35733	2.14185	1.9001	2.15957	1.63268
NPFFR2	770	0	0	1.53602	0.684972	0.111877	0.17904	0.314335	0	0.045041	0.041471	0.39272	0.687705	0.255429	0.0483	0	0	0	0	0.2914	0	0.018164	0.271149	0	0.181851	0	0	0	0.111142	0.016172	0	0.037821	1.17385	0.342625	0	0	0	0.628319
PHF21B	771	12.9912	24.9654	15.334	26.2035	19.8035	20.1202	29.3976	29.2939	9.21889	11.8236	6.18685	28.196	16.1573	10.2086	16.7122	21.8319	19.853	19.628	15.857	11.6083	8.42963	16.1342	20.5711	13.5381	18.2991	12.5713	21.9496	19.2113	21.272	19.1882	8.00131	8.46476	14.8846	7.12389	13.5517	7.91447	1.1632
TRAF1	772	0.217612	0.411027	0.19748	0.202403	0.122866	0.302574	0.142538	0.271839	0.105253	0.091044	0.231819	0.418827	0.185484	0.223708	0.101398	0.228878	1.11521	1.15744	0.497169	0.772992	0.65783	0.938687	1.06019	1.05035	0.579909	0.54304	0.614435	0.346409	1.05876	0.700752	0.256211	0.470263	0.190298	0.514282	0.278696	0.22717	0.235404
RC3H2	773	10.3169	12.4371	9.67475	9.01063	12.6396	8.25952	9.2136	7.73911	9.5225	8.13166	8.08679	9.64092	12.7711	9.14179	10.4096	10.8255	10.93	11.8874	11.7498	11.1406	10.2141	9.15739	11.4994	12.0801	16.8819	14.8872	14.9408	8.58515	11.2266	14.3348	12.0643	8.68609	8.52384	14.3455	14.3312	16.4834	17.2335
PCGF2	774	29.146	42.3826	35.7226	35.3066	40.8728	56.2451	38.1087	27.3534	27.162	20.7633	21.2972	39.9592	32.4877	38.8467	25.8512	40.4217	52.2544	48.2226	40.0033	35.4224	47.3323	40.0536	52.0368	36.9969	45.5213	50.3812	52.467	45.2698	57.4812	46.3273	33.8813	42.0092	36.866	35.8507	45.7857	37.3716	15.0012
IL17RB	775	1.32464	1.77286	1.64207	2.065	1.70386	1.66512	2.00188	1.78143	1.07863	1.13758	1.23373	2.40983	1.95724	1.29112	1.6214	1.53251	1.07398	1.11374	1.58593	2.04611	1.80462	1.7736	0.860442	1.67169	1.4712	1.12298	1.43484	1.58087	1.14115	1.45391	1.74168	1.81547	3.21216	1.85374	1.67828	2.41825	2.33607
TRAF3IP2	776	0.714741	0.563115	0.940888	0.897763	0.885335	0.545752	0.916775	0.432104	0.363623	0.502263	0.895723	0.737056	0.799734	1.10411	0.456519	0.536015	0.53069	0.576361	0.850662	0.359235	0.603265	0.906636	0.698286	0.874757	0.679457	1.06185	0.880333	0.816761	0.72681	0.635346	0.976459	0.760055	1.344	0.430889	0.538692	0.443874	0.687659
GYG2	777	4.84002	5.37298	3.16748	3.65819	3.34549	4.16653	3.48864	4.71358	8.9146	7.39622	7.49097	5.2681	2.88978	5.31112	5.7958	5.37212	8.68079	7.93765	3.09143	4.46023	4.11691	4.5333	8.09758	4.22259	2.6649	4.11468	3.70433	4.42213	6.82138	4.2389	3.79691	4.37011	2.17355	0.838389	1.11244	1.65205	4.76276
DCBLD2	778	6.47592	6.41524	7.46396	9.50315	5.47831	5.04886	8.95128	12.5545	6.14051	4.86663	5.19414	10.0686	7.10953	8.52876	5.64573	5.36161	4.77943	5.14877	6.9293	10.9557	4.88554	7.98277	6.13921	8.0786	4.83911	4.7931	5.0327	7.53838	4.21475	4.65663	1.95768	6.1407	4.67155	2.15466	0.45352	0.431957	7.1348
SERPINB3	779	0	0	0	0	0	0	0	0.022588	0	0	0	0.022336	0	0	0	0	0	0.022973	0	0	0	0	0	0	0	0	0	0	0.064306	0	0	0	0	0.017583	0	0	0
SOAT1	780	4.46251	4.97061	2.1472	4.65103	3.51275	1.45969	4.8348	1.25888	3.52402	4.0617	3.05776	4.18971	3.26923	2.90595	3.96724	4.1545	5.59684	5.27338	4.41165	1.29785	1.57953	5.55143	7.19806	4.98545	3.82781	3.25385	4.68278	7.13652	3.62648	4.03455	3.58085	2.01739	4.75298	1.90622	1.81817	1.75646	2.24343
PKP2	781	1.50451	0.929912	0.733293	0.762636	1.37956	0.511003	0.691755	1.38015	1.21163	0.707321	1.84206	0.581994	0.765668	3.43215	0.721711	0.952496	1.00041	0.928396	0.810854	1.35839	0.792117	0.481854	0.854163	0.8103	0.995748	5.16985	1.58212	0.693334	1.84801	0.991837	6.05651	0.796079	0.814557	1.14362	0.251608	0.476531	2.09305
MSH4	782	0.053486	0.044433	0.013229	0.010226	0.034523	0.038674	0.050782	0	0.027398	0.07465	0	0.027546	0.009161	0.017075	0	0.02212	0.099502	0.024958	0.014524	0.143992	0.035171	0.158604	0.033579	0.092866	0.029847	0.011466	0.02457	0.020354	0.004091	0.048433	0.040664	0.025517	0.027138	0.032913	0.011686	0.010761	0.027056
F7	783	0.066516	0.145278	0.185442	0.052909	0.059541	0.322508	0.027872	0.021355	0.618095	0.206459	0.24589	0.083892	0.081122	0.1798	0.159111	0.038896	0.30172	0.258852	0.017812	0.079321	0.203163	0.076046	0.099292	0.189585	0.036501	0	0.031853	0.007217	0.528068	0.04186	0.07045	0.515199	0	0.113003	0.064966	0.705853	0.105944
GDI2	784	135.118	90.2071	104.165	115.634	90.3295	61.4012	100.804	100.908	134.751	140.478	123.43	93.0476	87.5606	121.444	120.359	102.733	83.3853	81.9171	84.9393	76.9394	57.1253	69.1452	70.6689	70.4866	85.5423	95.389	84.4489	89.8243	78.5768	86.5257	85.0359	55.9747	82.0916	57.7356	64.4916	72.4185	94.5236
PRDM1	785	0.283099	0.481589	0.323553	0.440137	0.307533	0.192131	0.266326	0.121649	0.290339	0.207549	0.227379	0.231086	0.364077	0.429625	0.249483	0.516542	0.19929	0.158624	0.126786	0.169371	0.383205	0.187038	0.136137	0.248903	0.473281	0.221364	0.278103	0.145625	0.15587	0.255225	0.210231	0.152014	0.224097	0.108176	0.2791	0.229867	0.16829
ATG5	786	9.30205	6.58854	6.28232	7.17721	6.60683	4.28583	6.72286	5.45279	8.02595	10.1785	9.79177	6.74014	7.22298	7.93382	8.30438	6.19043	4.06986	4.06131	5.8759	4.6012	5.05388	5.30603	4.68259	5.51669	5.82579	6.00595	5.15224	5.68079	4.28103	5.10006	12.149	7.11902	9.04106	7.19934	6.15659	6.44469	17.5777
TMCC3	787	0.574879	0.836144	2.71906	2.2332	1.9696	2.59895	1.69463	0.808192	1.03497	0.747328	2.06105	1.18501	2.91207	0.927641	0.717569	0.625179	0.439991	0.816388	2.79209	0.969193	3.99648	0.837499	0.191162	1.37128	2.97185	1.49714	1.00004	1.2901	1.07223	0.987566	2.33722	2.39873	3.22211	1.1541	0.841647	0.878153	6.88323
PITHD1	788	25.3878	21.9747	40.5189	25.8472	27.8281	42.23	23.5359	25.2008	27.1784	29.3395	36.6554	24.6295	39.3861	26.1351	24.1156	21.668	18.9923	18.9973	28.6942	29.1692	39.6027	18.3549	18.3078	23.8837	19.3666	22.5168	20.2645	19.751	19.5053	20.7648	40.6408	41.3375	36.9026	34.2202	28.0216	33.0703	74.6955
MTA3	789	3.82069	4.44978	6.83702	5.93069	4.66087	5.5306	5.31808	3.77454	4.4835	4.42868	5.44334	6.1692	5.41358	2.52264	4.41487	4.81159	7.37518	7.10529	8.26979	5.27088	8.13195	7.33768	6.52058	7.9042	6.5767	4.50173	5.80465	7.95546	5.961	6.62155	3.85833	11.6162	5.65289	6.37939	5.34807	5.91784	5.20398
USP13	790	5.01208	5.53522	4.96414	5.78274	4.92165	3.93939	6.51858	3.8083	3.93053	3.37064	3.04813	5.23389	4.81242	4.47741	3.90947	5.08405	5.86905	5.67225	6.67054	3.31923	4.82276	5.82287	7.28824	6.37365	5.58648	5.40984	6.94602	8.06113	5.45655	6.17139	3.261	3.58464	6.03495	4.66217	4.15864	4.33912	2.7339
ATP11B	791	5.68662	5.63012	3.28632	5.76755	4.50591	2.42598	5.63452	3.85359	4.98112	4.72805	5.54097	4.94363	3.81214	5.53274	5.25831	5.22712	4.88797	4.99495	6.02773	3.11238	3.12288	5.02064	6.22492	5.71975	5.71794	5.9972	6.59112	6.92444	5.03178	5.68499	3.93029	2.17634	4.58318	3.26719	2.92314	3.71655	4.2832
LAMC2	792	0.474749	0.691852	0.473211	0.3825	0.845008	0.150937	0.317578	0.037017	0.205987	0.669736	0.686255	0.484613	0.511562	0.176892	0.974574	0.794896	0.449079	0.407693	0.318693	0.31514	0.452674	0.550319	0.407968	0.306499	0.734677	0.306837	0.354233	0.096306	0.251241	0.795989	0.092467	6.74126	0.176506	0.099619	0.175157	0.228003	1.07879
CDK14	793	8.91917	9.18532	15.1525	18.2407	10.6402	17.2714	18.6159	10.3697	9.24502	7.76475	12.4339	15.8656	15.8564	17.7183	9.17546	8.22429	7.81178	8.49137	21.5259	16.5084	25.806	16.4713	9.2419	21.513	8.76906	14.425	8.97361	23.4589	7.82529	8.72654	11.9905	12.5547	15.5074	5.51715	2.72046	6.74659	22.9503
SEC61A1	794	47.9782	41.6441	49.6588	49.4728	46.5723	40.9161	44.7241	39.087	42.0003	42.9212	50.8491	44.3044	48.806	52.5418	40.7376	45.515	34.0387	36.0935	43.1548	40.5277	45.5974	33.1745	32.772	36.2001	34.6286	48.5544	32.5029	42.5008	42.1925	37.0219	65.6575	44.9781	59.4117	41.96	45.9191	46.2989	38.4047
PPP1R12A	795	4.66983	6.68198	4.683	5.9333	6.11223	4.93928	6.2485	5.67623	4.97294	4.0043	4.61881	6.47515	4.97684	5.20064	5.03169	5.65156	7.53174	6.765	7.02013	5.96359	5.24234	7.66151	8.36502	8.33002	8.51136	6.81767	9.79137	7.47489	6.42481	9.00473	5.52535	5.04005	4.99572	5.71981	4.92846	7.03226	6.89824
RASGRF1	796	0.210862	0.37184	1.86796	0.305269	1.36529	1.11416	0.209916	0	0.16736	0.101752	0.176919	0.942862	2.30961	0.0175	0.170902	0.296741	0.236818	0.509083	1.69155	0.193664	1.81575	0.978525	0.100339	2.09581	1.66189	0.441465	0.606196	0.079384	0.549638	1.01538	0.987779	4.53583	0.521297	3.32909	3.82585	2.8513	1.31992
CAMK2B	797	1.34591	2.76128	7.93725	2.22349	6.43049	14.1709	1.39667	4.70606	1.93748	1.37199	2.08455	4.23519	7.49983	1.22186	1.9396	2.5405	3.258	3.28933	4.93043	11.3515	13.6635	3.55233	1.14919	4.85707	4.67981	2.76345	2.37465	0.538927	3.92176	4.97396	6.15079	17.7575	4.14187	15.8493	13.8882	14.6185	8.08487
CROCC	798	3.6406	4.81031	2.51978	3.62858	3.12215	5.17554	3.50521	2.73881	3.34942	2.48429	1.45808	4.59518	2.38521	4.60694	2.64372	4.64336	3.7258	3.79246	1.98633	1.48595	2.65862	2.69051	4.13584	3.31445	2.14177	3.06269	4.04927	2.41886	4.05371	2.49919	1.94416	3.87974	2.9707	2.66979	2.95824	1.87072	1.00319
POLR3E	799	8.02486	9.94101	6.22198	6.97719	7.67897	9.45333	7.21157	5.97117	7.74961	6.70709	6.4887	7.47305	6.06838	8.77916	7.011	8.64513	6.69077	6.70201	5.03333	4.48848	4.98545	4.98841	6.29407	5.85488	5.40001	5.51259	5.95593	4.98653	7.21273	5.64574	7.96619	7.84796	7.40535	10.6525	10.5137	9.2023	4.19181
ATP2B4	800	12.6061	15.5752	12.5236	14.9534	16.4135	12.2406	18.7809	3.08585	9.62175	7.33812	8.79341	17.0414	18.1716	14.2215	10.1173	15.8509	17.8836	18.6596	25.069	6.28045	18.0362	16.0322	23.5863	19.6555	25.1274	27.408	23.1001	22.4962	16.7652	21.2355	9.37626	8.09415	21.4162	4.62533	14.4952	3.50385	5.04672
ZC3H11A	801	6.47224	10.874	5.9585	6.66324	7.22022	6.76061	6.74019	5.18709	5.68999	5.41364	6.26099	8.56758	6.26138	6.48836	5.66159	7.52316	10.4606	10.0844	6.95612	6.4782	7.24542	9.85095	11.0313	10.8281	11.4405	6.99183	12.5503	6.91067	8.40088	11.434	5.58092	7.43404	6.09717	7.48803	8.8173	8.05433	4.47703
RIOK2	802	7.45722	5.60344	5.8453	5.84047	5.38897	3.12025	5.9524	5.43959	6.69737	7.27464	6.62968	4.96061	5.37736	6.70299	6.75023	5.91862	4.64941	4.08303	5.33533	2.00204	2.93114	4.04082	4.68897	4.12183	5.40461	5.06563	5.09152	4.50874	3.81745	5.09792	5.64948	3.18873	4.55932	3.14844	3.34199	2.65896	5.36741
YIPF1	803	11.2771	8.66743	10.7629	8.38728	10.2419	9.28184	8.36463	7.9144	10.2328	11.8685	12.0485	7.88733	10.8902	12.1864	10.556	9.70435	10.7952	10.7646	8.98398	9.36406	10.3396	7.55573	9.23341	8.39131	10.5441	11.9801	9.62612	9.05957	12.2005	10.5274	14.3663	7.74389	10.8938	8.14	10.821	12.2102	11.2991
TMEM48	804	17.0294	11.7216	9.76786	16.7548	10.1397	5.46649	15.2959	12.6984	16.3524	14.1657	12.1069	12.4626	11.5404	17.2934	12.5108	12.4374	8.83311	11.3682	12.0975	11.0401	7.11712	10.6362	11.6036	13.7085	9.15286	12.4216	11.6607	15.921	9.75616	9.05284	12.9924	7.38798	13.1154	6.71571	6.65751	6.98466	20.7376
DGKG	805	0.142154	0.368077	0.11635	0.081426	0.349548	0.251035	0.21816	0.044881	0.288045	0.204417	0.207946	0.216314	0.322707	0.165776	0.367352	0.274634	0.621999	0.64581	0.24395	0.039078	0.368637	0.302335	1.11824	0.178074	0.431611	0.382562	0.428627	0.308042	0.474379	0.711271	0.969797	0.19478	0.196125	0.311721	0.792216	0.284869	0.320906
FLYWCH1	806	5.76598	5.72902	6.86574	5.66113	6.89064	12.1471	6.13557	7.61617	4.79671	4.41611	5.05027	7.01234	7.22943	5.79434	5.70379	6.55338	6.58231	6.68202	6.37205	8.60957	10.8363	4.9507	5.86008	4.72783	5.45032	6.88211	6.09932	5.19372	6.56975	5.41086	5.78511	10.6299	6.99213	9.22316	10.0565	8.8102	4.31604
UNKL	807	2.23664	2.56272	2.12515	2.17059	2.07292	4.61452	2.13367	2.95585	1.94158	1.82588	2.09392	2.92236	2.0663	2.65794	1.94969	2.63203	2.96778	2.84529	1.83889	1.61934	2.86748	2.38035	2.73435	2.12123	2.18739	2.16766	2.79762	2.01024	3.09294	2.20389	1.73561	2.98681	2.34466	2.53058	2.54557	2.53616	1.68018
TBXAS1	808	0.195859	0.225571	0.19483	0.176895	0.329665	0.368663	0.17993	0.186068	0.178162	0.279157	0.379688	0.2056	0.224402	0.414986	0.177429	0.193849	0.116232	0.226806	0.161135	0.201192	0.269129	0.182954	0.130066	0.204849	0.202261	0.259452	0.165287	0.127267	0.163163	0.195254	0.141439	0.106838	0.138149	0.204908	0.260693	0.158953	0.156975
PARP12	809	0.250847	0.139996	0.175715	0.180843	0.323313	0.147472	0.171709	0.084337	0.202111	0.209309	0.422357	0.209183	0.216702	0.54777	0.318099	0.285978	0.135992	0.276455	0.086505	0.034392	0.243555	0.148513	0.14352	0.253694	0.132804	0.261988	0.239854	0.113424	0.199517	0.194673	0.530633	0.244914	0.258287	0.159013	0.382922	0.24336	0.205153
ALDH18A1	810	30.3899	29.3435	19.6263	28.0846	21.9921	17.669	26.0831	20.5499	31.3015	26.0606	26.3615	23.9158	19.6169	33.9205	24.3802	27.4585	25.7211	26.9498	20.9632	15.7275	14.698	16.5829	26.2309	18.2061	20.5846	32.37	26.1384	23.2363	28.2516	21.6366	21.9522	15.1971	22.9623	15.427	16.0678	18.6145	9.67763
TARBP1	811	0.626335	1.46392	0.281583	0.365035	0.624826	1.64077	0.399467	0.176505	0.524322	0.488872	0.674356	1.23103	0.375376	0.612336	0.428366	0.605475	3.49779	3.57313	0.709895	1.35087	2.45551	5.4537	3.72635	4.34091	2.92799	0.750871	3.03388	0.875567	2.53021	3.30606	0.751041	2.72984	0.809822	2.12068	2.40002	1.00253	0.851436
PET112	812	2.6015	2.02354	2.60354	2.27214	2.01802	1.7609	2.1599	1.31515	2.25327	2.43619	1.95982	2.08632	2.40968	2.14133	2.13815	2.13366	1.87591	1.88287	2.02876	1.59272	1.96703	1.84705	1.92501	1.85424	1.65365	2.10215	1.59846	2.02036	1.75447	1.78746	2.64943	2.59877	2.5015	2.17323	2.27109	2.19505	2.8259
MXD1	813	3.36579	3.61708	5.09265	3.93953	4.88241	4.68029	4.07869	4.14506	3.26305	3.70949	3.4634	3.89708	6.55327	3.24787	3.58467	3.45395	5.95863	6.63989	7.69754	5.00325	6.39784	6.27589	6.81953	7.22216	6.89635	6.31849	7.52348	6.16349	5.95966	7.48397	3.28763	3.27936	3.26875	4.40139	3.32471	3.56813	4.58493
CDK17	814	11.677	10.909	20.3906	17.9981	12.1178	9.90063	15.7664	7.92825	13.3118	12.9819	12.1415	16.2447	17.2503	13.5871	12.7978	9.86801	7.31571	8.77691	12.1435	5.13801	9.22629	12.1451	7.49111	14.9154	9.54298	14.0922	8.01431	10.5857	8.99142	7.97157	20.4414	22.5543	14.6166	8.32048	12.605	16.5311	13.4998
DNAJC25	815	4.3675	3.58377	1.97146	4.00195	3.3003	2.40529	3.32843	2.07155	4.98033	6.03047	6.35036	3.15702	3.2163	4.49904	4.51885	3.13126	2.29089	2.33606	2.06325	1.28124	1.76534	2.75728	2.21912	2.53826	2.67132	2.3668	2.27763	1.94009	1.72501	2.34536	3.97984	2.29202	2.86084	1.87366	1.84465	1.49192	4.58973
SLC2A3	816	6.05901	5.36668	11.7071	9.33061	6.81341	8.18544	9.8268	6.68991	5.62889	4.81417	7.22405	7.71446	9.54003	6.29604	5.65535	5.12146	15.2481	14.223	19.2331	11.004	17.7082	15.8371	18.3321	17.7152	16.1076	14.4727	15.8045	18.7526	12.847	18.2621	3.82372	4.69497	4.90361	3.99329	3.87205	3.98612	3.55998
PSD	817	5.55416	8.39353	20.7408	8.10966	13.4742	30.8433	6.72549	11.864	6.82231	7.67225	8.95627	13.603	20.7214	4.66016	8.42074	8.00653	9.18091	9.90035	15.6444	23.3165	28.139	10.2119	4.17921	12.6265	10.4789	8.52759	8.22631	4.92205	10.7447	10.0838	18.5094	43.2715	17.4738	36.3098	35.2335	28.4622	21.7451
CTDP1	818	6.52834	7.89029	6.79207	6.42983	6.92205	7.69197	7.01105	5.50921	5.42446	5.56025	4.05326	7.05262	5.53507	6.90921	6.22265	7.23978	4.7686	4.90928	3.78459	2.69021	4.22563	3.26911	4.309	2.83153	3.14429	4.92403	5.24339	3.91597	5.75101	3.27217	4.61899	8.79031	6.57604	6.85594	7.48368	7.61505	2.43944
CSDA	819	3.38674	2.92721	1.76926	4.21148	3.28642	1.61655	3.30354	2.53752	4.47638	3.45562	5.26954	3.69683	1.51093	4.98878	3.12292	3.12485	2.08907	2.12806	1.5759	0.775834	1.23727	2.16515	2.48479	2.8693	1.78073	1.7257	2.70647	2.69025	2.15019	2.08178	0.786268	0.297568	1.71505	0.477264	0.328438	0.578063	0.284526
STYK1	820	0.083924	0.031671	0.281113	0.116626	0.240342	0.773249	0.174899	0.404516	0.118287	0.02854	0.258844	0.115497	0.416225	0.044319	0.067917	0.075384	0.059641	0.094291	0.511571	1.2928	1.04194	0.053418	0.010847	0.246386	0.043082	0.331765	0.035225	0.036248	0.128586	0.034406	0.479938	0.1835	0.219228	0.245371	0.155914	0.86907	2.51438
WNK1	821	5.82574	16.9991	7.31062	11.2463	9.87955	11.6046	12.2845	6.10373	6.07636	3.11169	3.10448	14.7021	8.73689	8.53458	5.86346	12.4405	21.0041	20.7787	17.2511	14.4956	15.9877	18.5804	25.1763	21.9333	18.5504	16.0595	21.1117	19.873	19.8793	19.289	9.07179	11.46	12.7333	11.0556	11.0778	11.2363	4.63703
RPS17P5	822	16.58	9.76072	16.3605	11.5254	9.33804	3.41787	10.5843	11.0206	16.5109	19.9118	16.2729	9.74807	12.0021	17.7598	8.76614	10.9354	24.1641	23.1452	31.1564	17.4818	17.8179	33.5161	28.8228	27.1328	20.6423	37.4982	19.796	34.959	23.4671	24.6529	82.1865	23.5304	48.2924	24.0403	36.3338	20.0706	70.2354
CCAR1	823	9.99397	18.1449	7.42424	11.1422	10.6235	8.68243	12.1092	8.77293	10.1624	7.67706	7.22797	14.5734	8.42575	9.12877	10.2048	12.5397	16.6466	15.3818	11.4888	10.1413	8.4165	16.396	17.4507	16.0484	15.363	11.1222	18.4839	13.88	13.9152	15.7431	9.91232	9.02404	8.52288	8.96651	9.72044	8.84735	6.63693
OGFR	824	7.4789	9.4603	7.12125	6.23736	8.80508	7.18448	7.80881	8.23567	6.97717	7.20917	6.09949	8.37739	6.31894	6.86386	6.66036	9.31103	8.25033	7.03823	4.99509	3.62301	4.14879	5.44127	6.73254	4.33353	4.58746	5.71483	6.3155	5.42647	7.76655	5.06201	7.0259	8.1917	7.27584	9.69326	11.417	7.97873	3.43715
GNA15	825	0.320452	0.22213	0.143372	0.046916	0.60561	0.592783	0.076667	0.114388	0.23164	0.366664	1.04794	0.074306	0.206544	0.355206	0.131053	0.259671	0.133427	0.228755	0.133272	0.081036	0.380393	0.042929	0.123231	0.056027	0.298507	0.338042	0.488644	0.078572	0.373225	0.406713	0.187692	0.078668	0.166764	0.453471	0.659129	0.332681	0.146182
CREB3L3	826	0	0	0	0	0	0.016318	0	0	0	0	0	0	0	0	0	0	0	0	0	0.016693	0	0	0	0	0	0.014513	0	0	0	0	0	0	0	0	0	0	0.103208
PIGV	827	1.94837	1.63055	1.33593	1.59474	1.39038	1.25113	1.60463	1.14293	1.5484	1.41299	1.97528	1.5103	1.34298	1.77652	1.11657	1.23971	2.37776	2.1093	2.51948	1.92576	1.69125	2.14217	2.73596	2.17122	2.48766	2.87204	2.34947	2.82403	2.3645	2.06281	2.28667	1.54999	1.95371	1.44345	1.71873	1.4005	1.3695
PTPRU	828	1.62927	2.33444	4.38432	1.32113	10.5641	3.63222	2.44746	0.787298	0.971073	0.736218	2.72447	2.33905	6.34153	2.49736	2.27723	2.3835	3.05997	2.26619	2.37648	1.59372	4.04582	2.00562	1.1548	3.49201	12.712	4.44359	5.19464	0.613506	3.18816	7.91183	3.61286	3.53825	1.59743	19.682	34.7677	7.74731	1.80381
SNRNP40	829	20.465	12.4536	11.1186	13.3849	10.2135	6.08026	12.6515	9.46789	16.4598	18.9283	13.1346	10.3575	10.1386	15.4377	13.2364	14.1179	12.2794	11.4985	9.89556	5.95725	4.92183	8.57129	11.762	8.10216	8.75349	12.7666	11.7241	11.8967	11.9413	10.0235	10.9941	7.52623	12.2507	7.02843	8.19599	7.30824	5.54667
RIMBP2	830	0.065562	0.222923	0.869939	0.413919	0.673127	2.59225	0.587687	1.2944	0.171826	0.211089	0.670281	1.33786	1.59889	0.345814	0.218502	0.10938	0.214164	0.42167	1.35122	2.61106	2.46993	0.936678	0.178839	1.98976	0.711462	0.458687	0.234326	0.559273	0.228524	0.281648	0.702779	2.26077	0.977659	4.74206	0.804807	0.762626	2.98574
COL11A1	831	6.7704	10.3729	4.84571	4.07582	15.2565	1.466	9.24321	1.98997	5.66376	4.47561	40.3687	7.61102	8.17041	6.22876	7.08078	10.7853	13.901	15.0699	11.5239	2.58286	2.95545	11.0905	19.7302	5.81323	13.5969	11.8679	18.783	13.0134	14.0655	17.7082	8.59321	0.656531	9.68535	4.0655	0.779856	0.603255	1.45067
QSER1	832	10.8806	17.453	6.18039	13.4226	11.6107	5.90159	13.9559	9.12383	11.2761	8.46061	6.09116	12.2752	10.1896	13.1245	11.1573	15.1342	15.1795	18.1668	15.6442	9.81516	8.11836	14.5105	20.6905	17.7733	16.8992	18.769	19.5659	17.7868	17.1997	17.4462	11.4923	6.14413	11.8687	6.70099	6.24294	7.44241	7.15364
BRP44L	833	13.3072	13.4734	16.5149	15.7834	16.5817	14.7881	15.5899	8.4868	15.5076	19.5175	15.7925	13.5543	17.0596	10.455	16.1574	12.959	8.01206	8.8879	11.1275	4.43387	9.03107	10.3234	8.43177	10.6524	9.7182	8.22788	7.48807	12.9166	9.09016	9.98411	16.4371	14.6632	21.5933	15.0556	13.0636	10.6609	21.4354
ACAA1	834	5.61703	4.36127	4.80209	3.79644	4.34726	3.70599	3.92433	2.15237	4.35772	5.7623	5.13051	3.90674	3.66149	4.43335	4.42699	4.8058	4.61092	3.99646	3.47938	2.20955	3.75193	4.26638	3.97895	3.30626	3.40817	3.84821	3.96265	3.47627	3.97233	3.482	5.35925	4.25162	4.70889	4.05695	4.19998	3.48533	3.48753
BCAT1	835	2.57325	5.17432	11.5337	12.1345	9.6642	12.8529	12.5912	22.1921	6.70466	5.88383	12.8224	13.776	15.785	9.1856	8.80616	4.17449	2.69314	5.02696	12.3001	15.8828	11.6739	9.95971	2.70539	8.0122	5.06748	3.54645	2.23175	9.91553	3.448	4.27656	4.06465	5.75785	7.12946	5.25322	3.3296	12.7379	14.9443
HDAC7	836	3.29035	3.83423	2.41905	2.40777	3.33695	4.57616	3.18661	2.61017	2.58968	2.15387	2.16239	3.83575	2.5487	4.26745	2.3794	3.75869	3.9305	4.1557	3.02544	2.11843	2.90578	4.09681	4.26696	2.99578	3.25461	3.71665	4.27751	3.41329	4.70163	3.28758	2.62922	4.08224	3.36539	2.82269	2.64408	1.78956	0.843433
LZTS1	837	18.8469	35.9834	15.1009	16.0001	30.8409	16.4244	18.4705	5.81584	12.2231	17.424	9.70653	20.8129	19.3324	7.89313	25.6509	31.7959	25.1502	26.0615	14.4973	5.23751	10.2903	13.9505	22.5243	10.3083	30.7126	17.8165	27.0457	11.7427	23.8027	33.3196	13.995	36.7946	17.7131	74.7579	69.2336	60.1603	4.35966
PRDM6	838	0.278733	0.244318	0.125953	0.010688	0.936031	0.781648	0.011286	0.026	0.034285	0.139806	0.764936	0.025191	0.108999	0.154886	0.237093	0.31921	0.14295	0.168498	0.060105	0.068915	1.28198	0.014603	0.101062	0.055038	0.423151	0.072394	0.498495	0.013455	0.218728	0.592059	0.056924	0.053703	0	0.448407	0.024262	0.034051	0.02847
WNT8A	839	0	0	0.021034	0.035764	0	0.015302	0	0	0	0	0.022373	0.095154	0	0.018182	0	0	0.008729	0	0.022781	0.020684	0.081779	0.043831	0.036088	0.020649	0	0.01823	0	0.020192	0	0.018992	0	0.159279	0.018975	0.044943	0.036658	0.033759	0.042726
SPAG4	840	0.087227	0.031676	0.078074	0.059536	0.116736	0.053937	0	0.036085	0	0.150863	0.417189	0.01772	0.120612	0.201557	0.041342	0	0.134479	0.169937	0.063635	0.019259	0.316198	0.072247	0.092631	0.104447	0.172581	0.256679	0.142077	0.01499	0.257837	0.08794	0.121463	0.05552	0.095982	0.183788	0.157979	0.062866	0.15698
NCKAP1	841	44.8157	47.528	37.1649	42.1977	41.5116	26.3257	42.4852	34.4331	49.1704	52.7008	43.4564	38.3201	44.6469	39.738	48.5604	44.9563	43.0999	49.424	47.7371	45.5684	37.7393	47.107	49.5855	48.3708	43.2662	46.7957	39.0472	47.046	47.5808	45.6279	80.7507	38.9768	47.2332	48.0494	45.8704	56.7154	86.8076
MRPS35	842	28.2126	21.7057	25.7293	27.027	23.847	14.5294	25.9026	20.7667	25.2914	29.3433	23.8754	20.7316	25.0933	24.6391	24.6166	23.0931	23.0909	24.6178	25.1525	19.62	18.704	23.0085	21.5945	24.4007	23.3642	24.7303	23.8032	26.8867	22.8212	22.8215	32.3877	23.1629	27.3785	21.5332	22.0359	20.4427	47.0211
GUCY1B3	843	8.01507	9.03013	12.7364	6.43687	9.44084	8.38498	6.24911	9.14529	8.78265	10.0037	11.4162	8.00621	13.903	6.26628	9.58022	7.47294	11.1282	12.2151	11.3931	9.9884	12.5818	8.60478	7.11755	9.23752	10.1249	8.11279	9.1701	5.89503	11.2362	12.6974	10.7803	35.461	11.6258	8.90289	18.6576	16.491	27.2289
SFSWAP	844	1.73352	4.37191	2.3165	2.60542	2.86053	5.35745	3.09439	2.00196	1.76466	1.35318	1.31047	3.99983	2.44899	1.75003	1.79002	3.14706	6.59159	6.1627	3.74065	3.1344	4.88464	5.00349	6.22757	4.91505	5.60746	3.75258	6.55429	4.41587	5.8509	5.85366	1.98805	4.06227	2.47476	3.71408	3.58764	2.80017	1.03277
TNK2	845	1.19107	2.29456	1.20716	1.48114	1.76965	4.13791	1.49896	1.3561	1.17217	0.867975	1.13396	2.0962	1.36513	1.57374	0.93973	1.76667	3.55886	3.73142	2.01386	2.31082	4.19343	2.96955	3.54927	2.86451	2.65977	2.25075	3.49276	1.86835	4.0512	2.48788	2.0644	4.03367	2.09114	3.73082	3.64121	2.21388	1.00896
MON2	846	2.76705	3.50158	1.97823	2.5748	2.66473	2.05621	2.4569	1.60691	2.21172	2.16812	2.00297	2.98349	2.77132	2.42832	2.36446	2.82896	4.09307	4.18855	3.3096	2.37792	2.61226	4.36513	4.78665	4.76932	4.03532	3.41428	4.44518	3.66217	3.75202	4.07966	2.49341	2.23864	2.7848	3.61185	3.43181	4.08588	2.72264
CDH3	847	0.655662	0.968182	1.76905	0.697299	1.91668	1.5219	0.647478	1.23306	0.525383	0.677192	5.67328	1.16276	1.30729	1.62545	0.721304	0.901349	1.47295	1.43353	1.5279	2.2523	1.90865	1.19572	1.02517	1.46442	1.97996	1.05955	1.52799	0.594876	1.26372	2.46077	0.740538	2.02559	1.06339	5.85529	6.68105	2.11751	0.863037
ARSF	848	0.096853	0.229029	0.19698	0.090288	0.226145	0.26541	0.173897	0	0.50525	0.61298	0.817316	0.017895	0.492616	0.367817	0.493333	0.215773	0.128594	0.133064	0.405555	0.01945	0.076376	0.143136	0.168521	0.018892	0.09403	0.221919	0.035503	0.075434	0.273843	0.106425	2.16749	0.16974	0.477413	0.16847	0.120178	0.191765	0.119983
GPBP1	849	25.3107	23.4197	24.1879	27.534	22.4453	20.5903	27.7277	30.5316	25.4827	26.6414	25.5911	26.1738	27.1418	25.9903	24.6971	22.1777	20.9218	22.2876	32.2674	30.1093	26.1692	24.5169	22.4041	28.5319	26.6163	23.9274	23.4009	28.3862	19.7306	26.9323	25.4637	23.4305	29.6796	16.9362	17.8405	16.8105	32.6663
DGAT2	850	0.259309	0.175087	0.576523	0.308998	0.228871	0.464247	0.184594	0.143958	0.188573	0.135861	0.247832	0.326534	0.301966	0.355031	0.082506	0.247766	0.13415	0.11986	0.198252	0.310663	0.550614	0.20232	0.128435	0.222979	0.117929	0.351073	0.184159	0.159832	0.254639	0.135047	0.523348	1.77191	0.335561	0.711341	0.758336	0.928434	0.437001
ZNF285	851	3.97058	4.17598	3.64768	3.38645	3.80639	3.28926	3.6568	3.13436	3.87789	3.78374	2.98928	4.0053	3.87514	3.56799	3.57478	4.1429	2.98156	2.81755	2.79938	2.29516	2.78165	2.56975	2.61124	2.54062	4.27483	2.97519	3.55516	2.1019	2.90599	3.74328	4.40854	3.83237	3.58542	5.09274	5.91036	6.07231	3.23649
CS	852	25.9926	24.2907	24.7449	30.8086	23.7305	17.0684	24.7323	18.6863	19.5158	20.7402	16.6046	26.7641	22.9665	22.6237	21.0597	25.2999	27.7845	28.5942	26.6271	27.9716	24.704	24.879	26.6903	27.8671	25.946	28.2046	28.9469	30.3935	28.5327	28.1943	20.0031	19.914	20.9934	22.4942	24.9201	27.5577	12.0574
LTK	853	0.011147	0.011148	0.040605	0.05156	0.011668	0.025964	0.017754	0.025051	0.013984	0	0.014462	0.036905	0	0.011594	0.014448	0.057229	0.050613	0.035051	0	0.01337	0.013081	0.028333	0.046339	0.05321	0	0.035352	0	0.025928	0.117099	0.012111	0	0	0.088181	0	0.023696	0.01106	0.027618
MRPS24	854	21.2612	13.7948	17.8681	18.3981	15.984	21.2903	17.9084	16.2156	18.1373	22.6021	21.8631	14.7011	17.0051	16.051	20.3311	17.9813	13.0121	13.7417	14.7049	11.7324	16.7009	13.7636	11.8689	11.5325	11.2079	15.1385	11.87	15.2087	14.581	11.0879	20.9338	17.7324	21.3492	15.1176	17.7947	13.4671	19.113
ELMO2	855	9.31648	11.19	11.3446	8.93879	11.4479	8.93417	9.09898	5.25342	7.72429	7.75505	7.8462	9.9772	12.0695	9.14521	9.27598	10.8578	11.1236	10.696	10.029	6.7744	10.4282	8.98893	9.86528	9.18206	11.3561	10.9056	9.69998	8.01063	12.1467	10.2356	13.6894	13.5105	11.8704	15.0499	14.5017	16.3427	7.151
WAPAL	856	16.2732	17.7466	12.0121	15.7284	12.8995	8.92978	17.379	11.8824	17.185	13.7941	12.19	15.344	12.7255	15.6525	15.8207	15.5716	14.4346	13.694	14.5396	7.03512	8.0529	12.3534	15.7663	13.4668	15.1773	14.2181	16.4488	15.1463	13.1159	14.0893	12.4512	8.01488	13.3293	9.15573	9.98789	10.6627	8.40284
VMP1	857	28.3671	20.2236	31.5167	22.9273	24.1965	20.7493	21.1207	22.1123	29.2681	35.7105	31.8809	20.1127	25.7256	25.288	29.5322	22.7075	21.2608	18.8474	23.1494	23.9749	22.8346	19.9937	17.9131	20.7972	20.6357	22.8672	18.7973	23.2287	18.3788	23.0423	36.163	28.1684	26.6546	25.1692	24.6743	25.6577	55.2502
APPBP2	858	20.4517	16.1646	14.4434	19.1673	15.3667	11.4127	19.296	15.4682	18.1765	18.3347	19.3924	15.8813	18.0264	18.9479	18.5348	16.512	15.8242	17.5939	18.3019	11.5106	12.1009	16.0547	18.4939	17.5191	17.2904	19.2751	17.4485	19.2299	15.157	17.2002	17.8248	10.8443	15.5968	11.6137	12.1118	12.844	20.4897
POLD1	859	30.0322	25.9607	10.5758	23.6092	14.505	9.06457	25.4288	13.3124	33.8247	25.4929	15.1048	23.6429	9.6914	24.994	20.4131	24.1877	29.9322	29.9566	18.2386	6.45886	6.84328	23.1406	32.541	18.0467	12.0646	21.9095	24.8279	35.1854	36.4794	15.0128	8.51871	5.6401	14.6839	3.4307	4.63063	2.99874	1.40361
SEZ6	860	26.7166	52.4949	17.5987	9.38295	83.6027	34.206	27.9233	11.971	10.5857	15.3552	6.55679	21.9969	46.4902	8.13523	32.751	58.0469	53.1605	40.7525	31.9909	41.4851	39.4395	23.0809	39.2407	19.1695	110.892	38.6729	72.8789	12.5732	42.0988	102.396	34.1751	31.0898	32.4725	132.358	178.843	96.0286	16.2574
EIF4B	861	61.1496	52.2711	56.3721	59.0103	56.1962	41.9447	57.8101	39.8827	57.9753	52.1733	53.5083	45.9029	47.1226	57.1266	53.4465	51.9507	53.7131	50.225	54.0986	34.1131	40.1608	43.0216	43.4329	49.4839	68.705	59.4758	61.2074	57.5339	49.1359	64.0051	42.9169	35.2579	48.4711	51.0695	67.8761	63.3247	26.7976
SLC6A16	862	0.043228	0.098327	0.025513	0.050727	0.037624	0.456538	0.125393	0.14268	0.078136	0.045867	0.044423	0.113706	0.121838	0.19522	0.018475	0.079705	0.23391	0.32341	0.259331	0.158896	0.836782	0.271136	0.398811	0.513721	0.148007	0.339215	0.279077	0.145499	0.455354	0.272677	0.220667	0.107167	0.292218	0.030689	0.177032	0.086398	0.093283
GLTSCR1	863	2.23937	5.77586	2.94254	3.44307	5.4803	10.6564	4.61832	3.88098	1.5552	1.26614	0.58407	6.77902	3.3312	2.09509	2.77571	5.09398	6.76093	6.46373	4.17234	3.88481	5.09482	4.95945	5.83723	4.06024	4.46467	3.74777	6.07065	4.79628	6.71836	4.96467	3.15554	7.61289	4.5998	6.78917	8.26053	8.49155	1.3412
SPHK2	864	4.27413	4.5163	3.22009	3.12319	4.55872	6.11036	3.93388	2.82519	4.02651	4.59607	4.12238	4.11366	3.43659	3.37936	4.22984	4.75852	3.18669	3.66575	2.58247	1.46761	3.12494	2.19205	2.92341	1.68375	2.43914	3.29468	2.94702	2.80659	4.19111	2.27753	5.13309	5.01078	5.14159	6.28071	6.46625	5.4516	1.84064
RPL18	865	200.637	110.609	144.921	142.964	124.33	128.298	133.672	135.299	176.94	209.854	196.172	107.469	110.703	172.156	174.959	138.679	115.193	118.234	110.725	65.6251	78.9752	90.4973	95.6115	78.655	88.0324	127.69	101.749	138.275	132.531	94.8727	133.495	108.922	179.215	111.067	150.479	105.516	58.3801
CA11	866	5.65641	7.34956	24.9605	8.52059	13.6124	39.0567	4.47916	34.9463	9.71161	8.09446	19.0747	12.2016	14.9471	13.7409	6.62253	6.7497	4.98056	5.6151	8.62574	25.0892	27.3211	7.33744	2.27048	9.45231	7.10149	9.90798	6.2695	3.22012	7.347	7.51387	10.2063	37.9717	8.87689	10.5569	19.254	12.2765	20.04
ISOC2	867	12.4709	7.64243	9.64216	11.875	10.0033	8.21525	8.55408	7.44919	11.9346	13.0232	14.3023	9.32875	10.5107	12.3017	8.67387	9.35966	8.7353	9.86192	9.90626	6.25228	10.2074	8.30477	8.78628	9.091	5.60365	10.6869	7.0342	12.5798	10.9306	5.30909	15.9959	11.8976	15.2771	10.2645	8.9984	7.81982	8.1926
U2AF2	868	77.7038	80.4225	71.9531	82.4072	72.4784	84.2879	87.4345	83.3145	86.3732	75.3761	58.5836	93.1037	61.456	77.5265	75.6142	81.9353	72.7346	73.9831	64.7308	51.4629	59.312	59.685	72.4591	55.1349	51.4779	66.5078	65.5669	77.4198	79.9756	56.2598	53.4784	66.2301	75.6454	52.5498	54.5486	44.487	24.5532
EPN1	869	38.0994	45.3556	48.609	43.6785	54.735	75.1632	49.4218	48.6993	39.5322	37.3859	36.213	51.3858	45.9833	42.3544	45.5664	49.0488	36.7113	37.6897	37.2122	43.2433	52.6516	30.6651	32.6176	29.47	28.615	37.0162	33.5377	39.0785	42.3852	31.5722	38.1641	59.8974	44.0637	53.0187	60.7202	48.6711	25.2733
MED29	870	13.0912	11.8817	14.9378	13.2122	12.1357	16.0663	11.9752	10.7622	12.9493	12.1244	14.3819	13.1244	13.9885	15.1996	11.3488	13.292	12.1448	11.6868	13.325	12.5255	14.9996	10.6426	12.1088	11.2522	10.9748	13.9223	11.5048	12.6715	12.2279	10.6113	14.0333	18.4871	15.1364	13.3039	12.4784	11.7972	11.2962
AHRR	871	0.348485	0.290502	0.351841	0.279453	0.271244	0.443134	0.315725	0.140268	0.305433	0.417222	0.513935	0.283254	0.394905	0.389248	0.36508	0.381152	0.282057	0.31301	0.355168	0.252762	0.479095	0.298287	0.341995	0.328842	0.266826	0.421932	0.260138	0.281592	0.408319	0.330125	0.579088	0.662562	0.633913	0.557966	0.463943	0.484099	0.365444
GSC2	872	0	0	0.073573	0	0	0.232624	0	0	0	0	0	0.076968	0.066157	0	0	0	0.009094	0	0	0.041828	0.124451	0	0	0	0	0	0	0	0	0	0	0.103511	0.076744	0.030295	0	0.034601	0.0432
ZNF275	873	3.18573	3.69269	3.2949	3.30399	3.88085	4.26592	3.79945	2.89535	2.73288	2.56904	3.21107	3.81497	4.14624	3.69601	2.75069	3.70038	4.41837	4.91283	5.90011	4.77759	6.13075	4.42888	5.4699	4.90219	4.77112	5.67064	4.92607	5.85501	5.02123	4.8084	4.35253	3.36144	4.77393	3.71484	3.8711	4.09117	2.53
MTMR1	874	10.8578	10.7415	11.5974	13.7518	10.5785	7.02881	12.7125	8.34348	10.2702	10.3761	8.894	11.4378	10.6786	9.43291	11.3654	11.4449	9.76315	9.23827	10.4831	7.77944	7.84018	9.26994	10.1136	9.74841	9.7501	9.7118	10.2089	11.5919	9.69784	11.065	5.86792	9.10132	8.318	9.60293	11.2569	10.7289	5.08793
GPC1	875	69.953	61.641	39.295	44.0978	39.6376	24.4318	61.0504	26.2683	62.1641	61.4347	35.4202	45.0483	34.9694	58.4568	47.1162	66.7092	83.64	84.9318	55.598	30.125	29.3068	48.0585	92.2049	37.974	36.729	86.3252	65.5721	86.4875	91.4044	40.6194	41.7753	37.2454	61.7129	26.5686	25.2537	21.09	23.443
ADCK1	876	0.977335	1.12196	0.897133	0.902216	0.907582	1.17076	0.735089	0.49586	1.02402	0.934525	0.829268	0.870008	1.02226	0.966478	1.06595	1.09764	1.41121	1.43129	0.881789	0.787671	1.01581	1.20272	1.66568	1.33057	0.890553	1.25427	1.16255	0.774607	1.64435	1.24517	1.22955	1.88368	1.18162	1.24271	1.32404	1.19632	1.03708
HAGH	877	20.381	17.5154	18.7787	15.6011	17.7702	20.6606	16.0522	16.9027	16.2992	22.3109	22.1096	15.8528	16.4701	15.8245	22.4165	19.5723	14.5079	15.2937	13.6717	13.3662	13.7008	13.3252	15.9191	10.4699	9.0442	13.2341	13.5509	13.8766	18.6199	13.6327	16.2079	14.5266	15.4334	15.0392	15.9515	10.4101	10.9357
RNF4	878	8.1288	8.90942	7.36223	8.71348	7.80224	7.83877	8.00513	4.67049	7.71265	7.55635	7.28483	8.3872	8.1612	7.63916	7.83606	7.56395	7.71895	7.79821	7.13688	4.48087	7.31729	6.01972	7.92631	7.03905	7.88523	7.48394	7.54613	7.14713	8.57893	7.12164	8.39429	9.81684	8.42652	8.84434	9.35985	8.66934	5.14492
CASP8	879	0.206065	0.103944	0.141355	0.063991	0.313917	0.067434	0.028866	0.033476	0.148149	0.086987	0.503744	0.037963	0.06995	0.249316	0.13376	0.174346	0.122147	0.122292	0.030531	0.099348	0.21764	0.142187	0.04515	0.123413	0.211505	0.177239	0.147705	0.018145	0.096704	0.173095	0.141706	0.085144	0.059976	0.161665	0.173088	0.122545	0.076624
LIMCH1	880	4.29496	8.27717	5.74818	4.87896	10.5457	6.76954	8.82867	1.25092	2.96067	4.21665	5.72218	6.65972	8.23155	2.89383	7.76751	7.27399	12.867	10.0851	11.3988	3.65961	7.35097	8.02316	13.7302	7.75605	12.1968	7.37208	8.00094	9.96164	8.47997	16.9648	9.29657	1.3162	7.86976	45.3384	40.6799	38.7662	8.29969
C12orf11	881	9.61572	8.40961	6.95868	7.85152	7.36872	5.12443	8.17572	6.58968	12.6683	9.91086	10.4571	7.71651	6.98271	9.81823	8.82229	7.86427	8.57552	8.29284	7.77009	6.87704	5.37697	6.2369	7.34956	7.16247	7.43375	8.4939	9.15232	7.49371	7.72412	8.67809	7.70001	4.68536	7.07731	4.86218	6.48406	5.66868	9.44994
TM7SF3	882	12.2566	8.37203	7.64988	8.1145	7.97578	6.90233	8.2095	5.55526	11.6566	10.6948	11.3673	7.59259	8.79511	12.1956	9.61043	9.50857	8.27625	8.02305	8.52813	4.45743	5.90533	6.33272	8.48002	6.37	6.58511	9.71646	7.84227	8.01518	8.30569	6.40114	13.7047	5.80157	11.4756	6.85576	7.65681	7.31622	7.38515
DLX3	883	0.039876	0.02695	0	0.061815	0.013913	0.031171	0	0	0.033349	0.01805	0.2067	0.014669	0	0.70074	0.051684	0.040945	0	0.060348	0	0.015943	0.047436	0.016892	0.013908	0	0.018165	0.309135	0.014852	0	0.225235	0	0.147931	0	0.014626	0	0.014128	0.013189	0
SPA17	884	3.52242	2.53822	1.99778	3.75063	1.4419	1.04677	3.12619	3.44788	4.73885	4.47308	3.50088	3.29275	2.0324	4.95691	2.71162	2.5747	2.25669	2.51374	2.96752	2.04125	1.09745	3.33265	2.26513	3.32409	1.19096	3.39603	2.2228	3.93059	2.52611	1.31478	4.35181	0.769889	2.73297	0.200991	0.154478	0.198972	4.19972
TSPAN32	885	0.28651	0.24493	0.077311	0.133422	0.218638	0.217694	0.149964	0.079109	0.123296	0.180335	0.415487	0.239725	0.152866	0.165589	0.11608	0.240438	0.541211	0.438798	0.317306	0.142512	0.255509	0.356449	0.635691	0.407447	0.265651	0.351037	0.566592	0.250296	0.327081	0.387607	0.145873	0.078403	0.200907	0.370287	0.311346	0.194529	0.14973
WISP2	886	0.007149	0.007347	0	0	0.022757	0	0	0.016398	0.018183	0.029391	0	0.007998	0.006875	0	0	0	0.025124	0.04113	0	0	0	0	0.015166	0.008678	0	0	0	0	0.053624	0.039908	0	0.042337	0.007975	0.006296	0	0	0.00825
DMRT3	887	16.7759	6.71589	0.571803	0.116706	1.72531	0	0.415881	0.119757	6.5363	2.74596	1.07879	0.133511	1.40578	21.4469	1.47879	8.05138	4.83145	3.94092	0.479462	0.054417	0	0.096092	7.56353	0.09054	3.84398	19.1676	17.3195	0.194779	10.6637	3.94671	6.41781	0	0.199683	0.039412	0.240884	0.015005	0.018734
ST3GAL6	888	1.41814	1.06663	0.598596	0.760052	1.17518	1.35756	1.02131	1.11163	1.33359	1.25819	1.7966	0.928949	1.08512	1.39072	1.1566	1.10203	0.885431	0.996699	1.05479	0.628732	1.72179	1.02375	1.1353	0.870312	1.60372	1.31326	1.16813	0.558794	0.933021	1.07194	2.23258	0.460611	1.49699	1.91918	0.434973	0.319105	1.74034
ATP2C2	889	0.050575	0.081979	0.346055	0.215699	0.195967	0.633352	0.102713	0.005427	0.037999	0.013587	0.085174	0.142031	0.209448	0.036418	0.09593	0.070508	0.241148	0.125545	0.231581	0.076281	1.00404	0.18568	0.104117	0.334474	0.190493	0.137504	0.075043	0.125019	0.229204	0.08438	0.568133	0.226915	0.642782	3.54279	2.43153	3.39348	0.137023
NGFR	890	6.2913	4.63724	3.0695	0.734973	11.4181	5.9549	1.02302	3.45721	2.95167	4.04399	8.70728	1.69486	5.47323	11.0553	2.36175	5.90982	0.908162	1.96948	0.25221	1.10358	6.82148	0.595375	0.88014	3.18784	7.91312	9.2977	5.81963	0.223273	4.82122	3.30817	9.67535	2.44214	0.095349	11.9775	12.3555	5.49911	0.193019
CDON	891	23.4596	38.1832	1.96577	2.03239	11.891	3.33174	4.72326	2.16361	39.9126	20.511	13.5656	8.9416	4.27776	23.9755	17.9784	30.0028	70.5912	84.6143	2.69352	3.24382	3.78641	12.8216	78.6714	4.50597	26.2504	47.4069	44.453	6.61383	107.705	33.7	7.15854	3.36366	0.529726	3.63946	4.88526	4.49242	0.998609
TAF2	892	6.93998	7.75178	7.51045	6.90062	7.4388	5.52283	7.2573	6.1392	5.95088	5.99889	5.7988	7.13873	8.09968	6.14925	6.87816	6.62304	6.97554	7.10482	7.9596	7.0832	6.11735	6.99981	7.94808	7.59934	7.7111	7.23804	8.05732	8.19146	6.52865	8.12515	6.80546	6.43775	6.39391	6.62302	7.39588	7.96012	7.15747
HIPK2	893	5.99659	14.157	8.12043	13.8126	11.4895	16.6786	14.2476	7.90876	6.50847	3.10573	3.80467	17.2886	10.0126	9.17624	6.61034	10.6445	15.1634	16.8271	17.7928	14.6997	17.1858	16.5543	18.9849	21.883	17.0976	19.5074	16.819	19.8558	16.9562	14.1375	8.27827	6.83469	11.679	5.17329	5.51336	6.64171	3.56061
TNPO3	894	23.6304	24.8825	28.1144	28.1807	24.9147	20.9244	28.4578	22.8251	21.046	17.1315	18.4725	27.3518	25.6351	23.5003	22.5704	24.1314	28.5799	27.3285	35.0864	33.6313	26.8907	28.7761	26.7036	30.7176	29.3402	27.7983	29.1186	38.0616	28.2123	29.9814	17.9435	20.918	25.1248	27.1116	28.4547	35.1865	13.9646
MEF2BNB-MEF2B	895	4.28921	3.4949	3.61829	4.67179	4.04818	5.50214	3.67927	4.33496	3.08235	4.04258	5.13686	4.77199	3.32997	4.72113	4.85423	3.98171	3.96008	4.20705	4.42247	2.72602	3.65585	4.18199	3.72858	3.13361	2.33181	4.53711	3.94955	4.39109	4.74001	2.81327	3.4686	4.71819	4.19113	3.32227	4.05176	3.73278	2.57554
RFXANK	896	20.5186	13.3028	10.2844	11.613	12.3831	9.06727	13.428	9.43678	22.6555	20.7257	18.4468	10.3697	9.58803	20.1753	14.8271	15.5341	15.4597	15.2294	9.23625	4.55134	6.1058	8.90957	14.3787	6.80686	7.54759	14.9629	10.0031	12.9018	14.4801	8.0871	14.1768	9.70441	16.2862	5.68899	9.16689	6.39426	4.72764
TMEM161A	897	6.52544	5.26529	4.00039	4.10072	4.9062	5.10164	4.58376	4.05488	5.21446	4.37808	4.94299	3.87892	4.15433	8.05435	3.81638	4.95951	6.43787	7.08739	5.86158	4.18863	4.77595	4.17552	7.08997	5.01487	4.4205	7.15953	6.52269	6.58482	8.14467	4.44878	5.60711	4.42745	5.49023	4.65313	5.77463	3.64096	2.1516
LPAR2	898	10.7384	13.5331	7.52463	8.91225	9.47843	15.4468	9.55088	10.7595	10.7802	10.183	7.60689	11.0085	8.55068	12.8227	8.93491	11.2252	21.0848	20.5837	9.24676	15.295	12.4916	18.2978	23.9077	15.8463	12.3463	11.8922	17.4904	12.7136	18.6763	14.9369	12.3874	11.215	11.669	15.3798	13.1297	10.9837	7.63802
CTSA	899	6.46676	5.77035	4.23913	3.96863	6.63246	6.56649	4.10613	2.58781	5.51661	5.88047	5.87012	4.43645	4.92083	7.29657	5.49521	5.72418	5.03529	5.39941	3.38885	2.51157	5.95583	4.30009	4.86308	4.16089	3.73988	5.36132	5.91371	3.52369	6.11129	4.51326	5.79863	4.75632	5.30007	4.24941	4.88399	3.64953	2.76243
SUGP2	900	20.4708	28.8326	24.8286	26.3244	23.9927	30.4496	25.1548	21.6181	18.7939	16.2944	14.6652	32.3824	24.4803	18.8458	19.9019	23.5713	40.0854	40.6765	29.959	32.9664	38.3618	40.0116	39.3244	42.7274	37.5583	26.3154	37.2868	31.7137	36.4391	38.1171	17.105	33.6117	21.7541	29.692	26.1909	28.1584	12.3361
SLC12A2	901	3.37601	3.58887	1.84788	2.37989	4.00795	1.75577	2.51777	2.03538	2.36563	2.49594	3.81132	2.54791	2.51543	3.38657	3.07035	3.19011	2.2819	2.18417	2.55568	2.22094	1.67545	2.57375	3.29621	2.95571	2.88513	2.53576	3.63443	2.66072	2.06748	3.22545	1.31071	1.1445	2.10166	1.713	1.27325	1.62509	2.28781
SNX24	902	3.90896	3.70153	3.02783	2.13538	3.92831	2.89223	2.95838	3.83384	4.96027	5.42216	6.58972	2.82757	2.76419	5.02392	4.04382	3.66662	3.67631	5.1232	3.50086	3.75865	3.97178	2.96098	4.00777	3.0349	3.43885	4.04931	4.23399	3.37288	4.24122	4.55223	3.76523	1.99555	3.3314	1.54323	1.32091	1.38914	3.47537
EYA2	903	9.42598	7.15058	1.69096	0.778011	4.44569	5.74299	1.74147	13.0664	4.9375	6.26436	6.80775	1.90348	2.84943	8.47954	5.64727	7.27788	2.73709	3.65137	2.4856	7.85902	5.72367	1.62522	3.18367	1.36068	2.66658	3.4671	7.02536	1.51264	3.15186	3.06085	0.366728	2.97327	2.78414	0.797243	0.115408	0.097628	0.562124
CNN2	904	21.7181	12.7506	22.9511	12.2517	30.2484	17.4113	21.1771	4.91382	5.81523	7.26143	28.5381	11.037	20.0601	25.8486	9.86639	17.6046	3.58873	3.9337	17.0368	3.54115	15.2818	8.1235	7.36819	7.99995	11.8414	17.5891	16.8733	17.5773	5.76762	13.2872	25.5128	15.9678	23.0623	9.7342	6.49343	2.74449	4.08493
ABCA7	905	0.269157	0.642431	0.338212	0.245702	0.458623	0.840319	0.155046	0.370245	0.267955	0.226115	0.233273	0.550504	0.323052	0.454524	0.238018	0.460878	0.610322	0.787356	0.10707	0.639631	0.857516	0.841351	0.646365	0.652721	0.634665	0.306205	0.714186	0.070089	0.712646	0.737618	0.31709	0.862228	0.089184	0.494132	1.06497	0.660344	0.268921
SNCAIP	906	11.5604	13.0243	8.92568	7.53946	8.48649	5.2066	12.4806	5.1636	7.88752	7.56728	7.05591	11.5509	9.88384	10.2689	9.42727	12.2405	13.0933	12.6259	12.3268	6.57394	4.29663	9.91216	14.9488	6.76723	9.87774	14.6899	14.499	12.0944	14.4637	11.3592	22.6881	5.12685	18.5162	3.80524	1.9436	2.11668	5.67085
DDX20	907	7.19325	6.05947	6.26072	6.6248	5.99357	4.3634	6.7794	4.99814	6.16656	5.89499	5.00663	5.84367	6.01769	5.70721	6.50943	6.13978	4.60778	4.36958	4.27477	2.80841	3.35035	3.71906	4.37487	4.21731	4.61433	4.9623	5.12233	4.72505	3.95079	4.73369	4.66321	5.52403	5.63442	3.83691	3.56286	4.66291	4.55283
BTBD1	908	19.0774	18.1925	21.8361	17.9308	23.1677	14.0922	17.0484	16.0424	18.5046	21.4675	22.3164	19.2131	24.4796	17.4011	21.5405	16.5446	14.2481	14.522	17.0005	16.0958	15.0871	15.5304	14.2918	17.2611	19.8042	16.3958	17.0149	14.3128	13.2977	19.7733	22.2071	19.098	16.7188	27.9629	26.5273	23.3868	29.2484
FAR2	909	3.29724	2.73054	7.88072	4.63332	2.9678	2.47627	3.55818	4.70988	4.6716	3.55336	4.26679	3.8807	4.3177	4.23756	2.75292	2.87013	2.52658	3.11323	3.30658	6.35621	3.37553	2.74362	1.83275	3.86363	2.04125	5.67537	2.16017	2.77354	3.58477	2.23317	8.72011	4.71858	4.08396	3.37674	6.42802	6.20414	11.7294
BCAS1	910	0.003997	0.020205	0.004875	0.01487	0.020861	0.06542	0.019628	0.018087	0.005082	0.005428	0.031112	0.008822	0.007583	0.021071	0.015541	0.012256	0.036295	0.035925	0.060293	0	0.090209	0.121563	0.016728	0.119583	0.010703	0	0.02233	0.046737	0.025283	0.029504	3.58148	0.121225	0.197197	0.126219	0.021241	0.170046	0.02469
POU1F1	911	0	0.023254	0.027978	0.04267	0.048018	0.153379	0	0	0.028776	0	0.059518	0.025314	0.003822	0.024186	0	0	0.026037	0	0	0.055027	0.081861	0.029151	0	0.027467	0	0	0	0	0	0.025262	0.056816	0.112633	0	0.051703	0.073142	0.107648	0.096
CHI3L2	912	0	0	0	0	0	0	0	0	0	0	0	0	0	0	0	0	0	0	0	0	0	0	0	0	0	0	0	0	0	0	0	0	0	0	0	0	0.18747
SBNO2	913	3.01885	5.13902	1.62709	2.14537	3.33487	2.3424	2.94816	1.48637	2.0597	1.81936	1.70062	3.00721	1.82765	2.47126	2.53264	4.81755	5.53759	5.22593	2.43086	1.0039	2.38008	3.20012	6.31117	2.44394	3.39963	4.04454	6.10437	3.52169	6.245	4.42185	2.30016	2.21744	2.0775	2.88509	5.90347	3.77882	0.369589
PMS1	914	5.89724	5.3159	2.99973	4.61376	3.98857	3.21609	4.27604	4.95033	6.61803	5.85549	4.85301	4.84842	4.38561	5.88299	5.91354	5.04796	3.98456	4.73851	3.90672	3.57852	2.74197	4.44835	5.27082	5.06611	4.67878	4.56623	6.21366	4.20993	4.44036	4.36715	5.2446	2.4226	4.20184	3.37835	3.36888	2.94261	7.5372
HMG20B	915	13.7087	10.0944	6.61074	10.8934	8.72162	5.30877	11.3494	9.33487	13.6897	15.4704	16.8589	9.41224	6.36017	16.181	12.2825	11.5846	11.1275	11.2476	8.45583	3.68651	4.81831	7.49319	10.3516	6.5257	5.79318	10.4045	8.90069	13.0562	11.1087	7.55725	11.5709	1.97022	12.3797	1.65654	4.06746	2.75776	2.45334
CALCRL	916	1.50321	0.95035	0.982614	0.511274	2.23534	0.396958	0.395621	0.936119	0.943137	1.80838	4.31682	0.328408	0.935445	1.88102	1.17191	0.869825	0.384468	0.628332	0.623809	0.357038	1.20226	0.511801	0.547477	0.656599	1.14188	1.00525	1.12821	0.574252	0.663895	0.918551	1.58467	0.421651	1.25393	1.27926	0.737185	0.601311	1.4327
TAF11	917	25.7368	21.4136	24.8495	23.843	21.1843	24.2059	22.8603	29.1514	23.268	30.0784	31.8846	24.5126	21.9153	25.2557	26.5953	20.5402	13.6141	13.4532	14.4656	21.5767	19.1182	15.5248	12.3735	15.1891	14.7486	14.2795	12.8119	12.4408	13.0764	15.3226	26.0341	25.5432	21.9951	18.4413	18.8523	18.1892	44.1311
ANKS1A	918	11.6397	12.6893	12.1445	9.96195	14.554	35.1883	9.85954	9.5213	9.34455	6.41768	6.3904	11.4794	18.2708	16.0297	8.46378	10.8942	11.3587	13.9331	12.8801	14.755	31.4521	6.25827	9.89822	9.52755	13.8133	23.1126	12.3472	6.21976	22.0448	10.273	11.932	11.608	9.31319	9.35	10.5081	12.3059	5.45662
AP3D1	919	22.7792	34.8066	27.9771	27.5944	32.3293	40.5916	29.5778	23.5283	20.7039	15.9061	14.6653	33.8425	30.2836	24.1554	21.3393	32.2958	36.4749	39.016	32.9034	34.6643	41.8322	30.1181	37.3522	30.8872	30.9232	34.8812	37.4512	32.32	42.1002	34.0225	22.8642	35.9369	27.2653	36.3898	34.2446	35.5561	13.6963
ZNF76	920	3.75665	3.74086	2.80737	3.68052	2.39176	2.99277	3.09731	2.94584	3.85557	4.03163	2.89219	3.52626	2.83573	3.70913	3.00509	3.50524	4.70897	4.63218	3.09029	3.13641	2.6943	4.47703	4.63087	4.16323	2.347	3.12771	3.85399	4.10161	4.61143	2.91899	2.58929	3.07984	3.02721	2.24379	2.27829	2.10219	1.62588
SLC9A3R2	921	5.47215	6.80335	6.35291	3.2061	12.8415	16.9523	3.79033	4.33241	5.76766	7.04433	16.0295	4.23982	5.97189	11.6247	7.63751	5.98154	2.15952	2.75546	2.44378	4.19822	7.93747	1.83971	1.27346	2.34882	2.17473	5.14408	2.83539	1.51026	4.34931	3.09589	5.50264	4.51228	2.96956	5.8938	7.44984	4.97029	5.27157
NTHL1	922	19.4865	12.1556	14.0652	15.1402	12.7423	17.3547	13.6153	15.1822	20.5227	21.9559	17.4674	13.2967	12.7769	19.3527	13.3864	13.9517	12.4872	12.6167	11.3164	9.78587	12.5285	8.64805	12.6414	6.86691	6.9928	12.7263	10.9154	11.9382	12.774	8.50159	13.9025	17.3276	14.4	14.7586	15.5881	11.5912	12.2984
UHRF1BP1	923	4.57483	5.3122	4.13132	5.06479	4.08276	4.13956	5.106	3.52234	4.70966	3.16865	3.66743	5.43917	4.83188	4.45348	3.70904	5.03669	5.94527	5.86411	6.45585	4.18757	4.64935	5.61757	7.0773	5.66107	5.63461	6.07063	6.69216	5.98526	5.97972	5.42498	2.43021	2.90159	4.11937	1.92685	1.83372	2.62296	2.13081
GNAI3	924	77.9468	57.2194	44.2419	62.561	52.3313	42.9128	67.8935	55.7671	78.8397	85.5333	75.4811	52.8668	54.9035	77.5479	73.4429	64.6103	40.9416	44.6045	63.9403	41.7039	47.8555	45.3964	47.5137	48.266	50.1467	62.6498	49.8578	66.6724	43.1376	49.9763	81.9363	28.0349	69.4508	35.1494	38.5865	41.0524	63.0301
IPO5	925	62.9973	47.5038	47.4297	60.0877	45.2366	19.492	53.7336	40.7849	59.0725	54.5094	42.0293	45.3819	44.4652	56.066	48.3903	47.5507	50.8522	48.9597	56.4271	37.4078	28.7975	48.7061	49.4483	51.5907	49.0684	59.6646	49.5226	67.082	47.226	47.895	41.8246	27.7458	47.5843	31.1494	28.4123	37.5858	36.6001
OAT	926	8.87545	6.97141	11.4559	10.7845	8.53028	10.6676	8.90402	10.5797	8.35315	8.87994	15.2478	10.8441	10.8585	12.6307	8.89934	8.02752	6.74684	6.88164	11.549	10.1286	12.0309	9.57001	8.1651	10.2573	7.9426	9.31716	7.15842	11.1787	8.11006	8.14479	21.2755	10.422	19.9867	13.608	6.71257	5.82265	27.7368
WDR3	927	18.8036	15.6343	15.6479	14.9607	15.5119	8.49888	16.3889	10.1521	16.8933	16.2151	12.9621	13.3755	14.381	16.1278	16.6878	15.3596	14.7477	13.2768	14.1073	7.16318	8.81546	11.0487	14.7336	11.2652	15.7427	17.4369	15.6913	14.0585	14.9097	14.5083	13.0902	10.2524	13.5602	11.5351	13.3514	14.5417	8.36149
PKN2	928	11.8812	10.7285	4.94925	8.9833	7.52516	3.71922	10.3302	4.20931	12.4368	9.50295	8.08188	8.61617	6.85462	11.6045	9.58945	10.0361	9.29187	10.1249	7.22518	2.87723	3.62988	8.9288	10.8089	8.91799	8.85348	10.3036	10.6956	8.8572	9.36613	8.07942	6.82608	4.37905	7.87778	3.89363	3.88891	3.79991	4.65477
WDR18	929	55.0504	36.0059	35.6534	42.0031	37.2697	34.7771	42.6089	41.2474	53.839	56.8948	44.5601	35.6384	33.6438	46.2855	43.9191	44.0701	30.5356	31.5232	29.5203	23.3498	24.0862	23.7676	29.51	18.9519	16.1298	31.0021	24.5563	38.4173	35.2473	19.8819	26.776	28.747	36.7085	21.8333	26.3055	16.9899	15.1693
TRAM2	930	1.32273	1.70276	1.92243	1.92937	2.40724	2.96489	2.55735	1.15101	1.26191	0.843493	2.6876	2.24934	1.74765	4.38643	1.14969	1.58402	1.20806	1.04477	1.82253	1.10347	2.66413	1.73319	1.56248	2.07923	1.58462	2.27189	1.39994	2.03917	1.54391	1.6382	1.59882	0.580302	2.21895	0.830596	0.765427	0.563878	0.875691
NTN1	931	0.263436	1.67578	6.04803	23.3907	5.79182	10.3261	8.54983	0.672554	0.893199	0.487139	1.48354	25.1603	5.20592	0.437626	2.94176	1.45975	1.13933	2.43168	4.0004	1.19673	5.43355	17.097	1.1025	28.5544	2.00645	1.23226	0.720607	9.40035	2.19073	1.45339	2.29073	60.4283	1.99769	1.45585	0.780298	4.37086	7.09121
GLP2R	932	0	0	0	0	0.006599	0	0	0	0	0	0	0	0	0	0	0	0	0	0	0	0.015001	0	0	0.010712	0	0	0	0	0	0	0	0	0	0	0.006701	0	0
MCM10	933	9.9307	9.45772	4.45013	9.84089	5.34474	1.43111	9.96052	4.00715	8.65921	6.92958	4.12625	8.59742	4.30749	7.17353	7.5022	8.88954	9.41184	9.08704	8.38437	1.68467	1.23019	7.79227	12.6101	7.83902	6.3191	8.62549	10.6006	12.7169	8.91363	7.1772	2.84762	0.852071	5.36935	0.102661	0.237178	0.136988	0.50901
DGKA	934	0.18924	0.255392	0.237507	0.216847	0.340521	0.358378	0.179827	0.351115	0.150513	0.234584	0.355962	0.239404	0.304122	0.371017	0.196471	0.20278	0.26172	0.314403	0.387714	0.566609	0.626986	0.270361	0.255817	0.411417	0.346105	0.348307	0.275315	0.290516	0.440418	0.227155	0.469616	0.185124	0.390922	0.248338	0.203065	0.167431	0.288937
ERBB3	935	0.004095	0.014502	0.146425	0.097778	0.038987	0.013681	0.02843	0.023481	0.041661	0.033747	4.52241	0.041044	0.070665	0.017448	0.032283	0.021139	0.056353	0.16402	0.082036	0.044611	0.113178	0.131246	0.047544	0.18499	0.118367	0.026271	0.009214	0.053467	0.34084	0.095451	0.710088	0.139473	0.12296	0.122223	0.008765	0.127073	0.071856
ROPN1	936	0.007751	0	0	0	0.008113	0.009088	0	0.008769	0.009724	0	0.040088	0	0.022057	0.024518	0.010046	0	0.017597	0.008798	0.020479	0.009297	0	0	0.01622	0.026715	0	0.032776	0	0	0	0	0.00934	0.024598	0.008529	0.000273	0.024715	0.014342	0
ANKRD44	937	1.30028	2.01233	1.2633	0.594208	2.19856	0.96423	0.773415	0.67951	1.07064	0.793102	1.01279	0.914504	1.7876	0.919976	1.68765	1.68758	1.72995	1.70879	1.15203	1.08425	1.50498	0.9308	1.27075	1.07142	2.38618	1.48063	1.67583	0.496418	2.18421	2.29955	1.16865	0.830487	1.13364	4.20599	4.80863	5.40648	0.905636
KARS	938	85.801	72.7897	87.0217	79.525	72.9335	51.2374	76.1454	66.2782	82.3329	83.3908	72.4646	67.0272	68.7782	79.2798	75.3922	73.758	65.468	63.6429	65.3743	56.9999	48.8196	52.401	56.4967	54.8007	57.1001	73.1722	59.8905	68.3639	65.7338	62.0891	72.9846	55.5566	69.786	55.623	63.8698	69.3639	48.9961
ADAT1	939	3.8044	6.13481	5.01757	3.94333	4.31256	3.96965	4.23752	3.15877	4.3618	2.60956	3.3657	4.45868	4.78866	4.97044	3.76203	4.09436	5.46038	5.07835	5.03577	6.23499	4.80959	4.88896	6.19333	4.84247	4.54722	5.8241	6.13764	4.34458	6.52586	4.83193	3.4467	3.54321	3.1724	4.38676	4.95807	6.09588	1.8395
PDIA5	940	2.83861	2.34672	2.01347	1.7844	2.10862	1.9162	1.95876	4.75617	2.76422	2.7501	3.71429	1.80857	1.83548	2.97201	2.1135	2.37515	2.16648	2.25542	1.84775	1.7173	2.17323	1.522	1.87924	1.64379	1.54097	2.3787	2.11701	1.44099	2.15809	2.00307	2.47897	1.3111	2.24872	1.19111	1.7552	1.36892	1.54994
TBC1D22B	941	7.08515	6.90144	8.6327	6.18619	7.05688	7.29203	6.15854	5.49866	6.209	6.59269	7.00478	6.58953	8.28876	6.29681	6.97646	6.59388	9.49941	8.87535	6.96659	7.50012	7.91988	6.22247	7.86569	6.17312	7.20705	7.83643	7.93063	6.90181	8.40437	7.20083	7.21655	9.3516	8.2854	5.59638	6.95817	5.91988	9.24311
NDUFB4	942	21.5029	19.3778	22.8261	20.7601	22.5494	20.4218	19.9973	23.9791	26.2557	28.9642	24.7794	17.2785	20.6064	20.8582	26.3169	19.5938	19.7709	19.4131	16.9819	12.7768	13.78	17.6887	16.7184	15.3456	14.8826	16.0849	15.5032	17.2071	17.53	15.8394	21.9514	18.92	20.9901	17.2839	21.91	14.6638	18.7693
SPEN	943	4.59984	18.7659	5.02111	7.63565	9.52302	18.0199	9.78754	3.80018	2.28984	1.416	0.503234	17.2205	6.90493	2.94569	3.56665	13.3367	30.2987	26.3715	19.247	15.2984	21.5929	22.93	34.5447	23.3535	28.7643	15.7343	31.7185	20.934	25.2804	26.8893	8.06957	20.583	14.3858	17.3962	15.0838	14.2125	4.2213
MYLK	944	0.312607	0.575485	0.468844	0.433468	0.625395	0.548744	0.299236	0.373665	0.428412	0.392984	1.18175	0.391304	0.25449	1.02631	0.48885	0.502771	0.473019	0.569551	0.197403	0.291817	0.673119	0.376458	0.27758	0.426948	0.300281	0.525335	0.38465	0.333582	0.766834	0.457836	0.26393	0.314298	0.19847	0.322134	0.612614	2.38969	0.307077
ZC3H15	945	27.4802	25.8395	25.8152	23.001	27.4102	23.5317	27.2453	25.9283	33.0397	38.3695	37.7153	24.4337	24.8938	26.4604	32.9201	25.0254	19.6925	18.8457	21.5191	16.6885	18.1504	19.2907	18.3469	19.1219	21.719	21.2635	21.9797	17.6552	16.1749	23.0546	35.6004	17.9287	22.0585	21.0819	19.6731	20.5579	50.3192
MAP2K4	946	13.6579	12.2366	10.7085	11.0457	12.2379	10.1832	10.153	11.128	11.2105	11.9766	12.0542	11.2712	16.4048	12.3458	11.9389	11.878	8.52992	10.5212	9.88965	10.5039	11.2369	6.07453	8.23969	8.85217	12.5158	12.3148	9.2212	6.20555	10.0332	9.89255	16.0974	13.3335	11.8915	15.2501	18.4272	17.434	18.738
TMEM206	947	11.1683	8.39476	9.76237	10.0111	8.50075	7.27273	10.0051	8.23658	9.0439	10.2674	9.12281	7.70015	9.81326	11.7343	9.25127	8.62843	12.474	13.0646	11.9219	9.06466	9.35387	10.3499	11.3077	10.1634	9.63671	18.6963	10.7578	12.7356	15.0696	10.5323	38.0395	8.13857	13.2332	12.8865	14.5453	13.2601	11.5865
SNAP91	948	8.12405	12.2333	17.8197	8.87733	20.3588	20.8547	8.70134	15.4634	6.86919	7.48243	8.72938	13.2955	23.9127	6.36732	10.8985	11.3411	11.8191	12.2019	15.7586	32.2058	29.3916	11.9498	8.00794	16.8159	19.3786	12.6316	13.1212	7.67729	12.8073	17.8529	18.5628	23.3195	11.0699	31.797	24.5988	30.1633	46.0917
SLK	949	10.0944	13.703	8.28744	10.1362	13.4101	4.8893	11.2646	6.04692	9.71066	8.2875	8.76452	11.1879	8.87249	9.85385	11.5877	11.7081	11.3973	11.6017	8.35782	4.10354	5.49397	9.53689	11.5673	10.2289	17.7174	11.6503	14.0372	8.45353	10.0211	13.8417	6.27276	5.5426	5.92947	8.87431	8.38104	6.47816	5.1718
CYB5R4	950	9.71752	8.20338	4.6332	8.39509	6.7904	3.2664	6.88257	5.13962	7.38499	11.131	5.72287	6.76687	5.95407	5.30859	10.1981	8.86258	4.83238	4.34157	4.14255	3.53757	3.04943	4.3333	4.56329	5.50115	5.00133	4.20271	5.41451	5.50721	4.1841	4.78869	5.45394	5.51754	5.73786	5.12174	6.28843	5.61989	6.80738
COL17A1	951	0.027859	0	0.033889	0.046431	0.005832	0.026044	0	0.018825	0.020969	0.01503	0.028915	0.038555	0.010356	0.017545	0.021568	0.011288	0.006325	0.012392	0	0	0	0.013971	0	0.008114	0	0	0.000673	0.013048	0.076234	0	0.006714	0.012668	0.010854	0	0.005922	0	0.006809
GSTO2	952	0.641082	0.363725	0.461257	0.445647	0.415811	0.133688	0.400116	0.175406	0.608662	0.28899	0.615109	0.449782	0.521481	0.769548	0.30328	0.378108	0.630689	0.929614	0.606484	0.410731	0.297471	0.924298	1.0464	0.838058	0.636575	1.02383	0.690769	0.762391	0.85618	0.493112	1.00283	0.51043	0.898714	0.397761	0.598294	0.421845	0.431115
SEC61A2	953	7.71896	9.10392	10.9228	8.94913	8.72594	12.066	7.66313	10.1935	8.17127	7.93381	8.51258	9.80721	10.8715	7.73509	7.60527	7.80432	9.42165	9.99209	9.78816	11.2777	11.974	9.18499	8.74425	11.37	10.5999	9.20266	9.30377	7.5329	9.79269	10.3515	10.9243	9.79711	7.98288	12.4961	11.8633	13.451	9.44698
PRKCQ	954	0.378749	0.524525	0.680826	0.459945	0.517446	0.494765	0.405445	0.178871	0.343206	0.229281	0.17858	0.290391	0.550101	0.510988	0.191393	0.237866	0.394028	0.273985	0.557433	4.1865	0.375833	0.362229	0.528352	0.518457	0.31639	0.333234	0.37908	0.467946	0.356724	0.370952	0.217255	0.258289	0.60318	0.119207	0.055663	0.208559	0.66436
TLE2	955	15.4882	6.69073	9.53091	3.83004	8.46199	4.63284	3.19867	0.602584	2.303	2.1652	7.65487	5.29259	11.429	3.76286	3.19705	11.0358	4.04767	3.39242	7.44668	1.91859	2.52865	4.0602	6.73339	8.83339	11.7073	9.56249	19.5774	2.7702	6.11589	11.1831	9.84417	20.5052	7.59828	7.28784	24.4258	5.13361	3.46889
ASB1	956	6.09985	6.64189	4.55694	5.99298	5.42585	5.87311	5.8302	3.5916	6.38034	5.4029	6.36638	5.97807	5.32028	7.40543	5.62193	6.8013	6.44548	6.20121	5.55044	2.91643	4.94266	4.74402	6.86858	5.22436	5.08727	7.34847	5.72189	5.84536	7.08653	5.62131	7.37522	4.40921	5.90301	4.42363	5.03278	5.80872	2.59789
FAM107B	957	15.2934	14.0902	20.6744	20.9382	17.8282	11.7288	18.6015	16.171	13.2322	16.3887	16.3546	17.731	18.8012	18.1555	17.4024	14.5853	10.0009	10.2149	17.2606	12.4798	12.8019	12.0952	9.01661	13.3832	16.8252	13.5552	12.9298	15.5448	9.72651	15.047	27.125	19.2614	22.3936	22.1549	19.6685	25.9799	20.1302
ME1	958	0.30637	0.298649	0.708657	0.815596	0.386825	1.34446	0.436057	0.47903	0.729399	0.660435	1.19298	0.824257	0.740906	0.511276	0.301964	0.237891	0.575695	0.683914	0.781759	1.08659	1.75769	1.23705	0.627761	1.3367	0.287175	0.513834	0.34153	0.740511	0.737016	0.175112	0.642517	1.24503	0.755476	0.173443	0.044578	0.512917	5.43699
TBC1D1	959	15.3055	18.6005	4.86959	5.8773	10.5829	6.19044	10.4979	6.33211	13.6104	11.6169	7.5556	10.4944	6.57907	14.3556	12.6051	17.0308	17.9787	16.3978	6.52353	3.68563	6.03138	9.20224	20.9948	4.8153	11.8945	13.2954	17.0338	10.3367	17.2388	14.124	10.5454	1.75466	5.02554	3.15304	6.37683	9.54651	1.14527
CDK13	960	5.49394	8.80983	5.83274	7.19804	7.80656	6.74325	7.73861	5.83409	5.20342	3.97701	3.54833	8.58971	7.05881	5.90914	5.42398	7.82838	8.83601	8.41835	6.40801	5.57498	6.23738	6.72386	8.88908	7.10957	9.20455	7.75201	10.2008	7.20895	8.2273	8.23217	5.42906	6.75702	6.70881	6.97542	6.96573	6.447	3.6081
MTHFD2	961	7.2624	5.62413	4.05804	8.04926	4.95023	2.71896	5.97748	8.73684	6.77381	6.92076	6.77224	5.44686	4.4928	7.41005	5.35357	5.10934	4.54118	4.51104	5.20971	6.53428	3.72793	5.68153	5.31796	6.27583	5.94869	5.48333	5.87758	6.59237	5.20062	5.32386	7.22777	2.81581	5.24856	4.55785	4.82451	4.10843	18.4155
SLC9A7	962	0.759859	1.40982	1.57235	0.978617	1.34333	2.07119	0.677903	1.1479	1.16994	0.52109	0.743138	1.5649	1.86249	1.56738	0.76328	1.30246	2.26658	2.53108	1.9392	6.42799	5.24999	2.16021	2.2013	2.95283	2.76276	3.3323	2.2016	1.32096	2.85083	2.04735	0.628781	3.2483	0.951649	3.6412	3.05665	3.75807	1.80029
FOXJ2	963	5.50969	7.22409	7.37122	6.71127	8.01991	8.01376	7.01459	4.70089	4.1738	3.11453	3.4057	7.52342	7.94524	5.15364	4.60985	6.94503	10.3604	9.58775	10.0583	8.70097	10.3498	8.65248	9.99651	9.74882	10.3211	9.39785	10.818	10.7696	9.37399	10.4182	5.23202	9.9223	6.9879	8.59284	8.70646	9.08091	3.65403
YBX1	964	568.708	438.851	490.54	504.23	505.857	476.674	527.069	539.785	739.219	787.143	635.298	478.683	400.309	507.966	754.071	492.105	278.922	265.663	286.286	279.118	246.253	252.495	224.072	233.112	262.688	292.719	249.759	310.799	266.311	278.817	396.347	273.214	332.414	290.347	307.164	266.498	578.346
PDE4A	965	1.0448	2.19968	3.31952	1.64798	3.01547	3.3171	0.887006	0.641025	0.978531	0.875609	0.995588	2.37856	3.20754	0.711431	1.82682	2.06243	2.23644	2.66627	1.64728	2.78459	3.78478	1.50972	0.752578	2.49418	2.62222	2.09002	2.24337	0.49045	3.05809	2.69934	2.6886	5.29697	1.21297	3.02631	6.79812	5.65583	1.73591
PPP2R5A	966	5.58699	4.20298	2.30539	4.33467	5.34845	2.03791	4.56619	0.961214	4.16477	5.35449	5.82299	3.52246	3.47146	4.04117	4.58793	4.98003	4.35073	4.56146	4.21113	0.895886	2.48915	3.6167	5.64064	4.29152	6.70959	4.39492	5.24073	4.58855	3.94848	6.69491	4.18956	1.25146	3.58707	7.09355	4.13577	7.92981	4.40016
CTNNA2	967	9.15832	16.5839	29.0992	17.8798	20.1425	27.6641	18.1824	24.3413	8.17784	9.46271	8.93269	21.6261	26.9219	11.4582	15.3445	15.9353	17.4756	16.941	27.9311	37.3027	35.5674	18.566	8.37991	21.3643	26.5236	18.776	19.212	18.059	16.8407	27.0927	30.0679	34.4385	23.0021	16.9031	30.1504	31.6977	21.9896
ELAVL1	968	25.9519	27.06	23.0153	29.2605	27.212	18.2812	29.4035	22.6092	23.9533	21.152	16.9074	26.7696	25.8003	26.0501	21.7837	25.4964	28.8881	30.1543	27.7434	24.6706	20.262	23.6883	30.5878	24.4318	33.5443	30.2967	32.2221	31.8924	30.7135	31.8157	19.1953	19.8773	24.0938	21.7204	26.3609	19.1869	12.2724
TIE1	969	3.44334	3.48355	4.02403	2.75442	5.47003	3.47916	2.89518	1.60998	2.13065	2.84536	3.97082	2.46429	2.99815	7.50203	3.39674	3.84616	1.40144	1.58379	2.11587	1.64569	3.48956	1.38011	1.45332	1.67457	2.53149	4.03053	2.98946	2.17656	2.50897	2.68374	2.47046	2.35086	2.12628	2.13382	4.13613	2.84647	0.928636
DIP2B	970	11.3468	13.9388	13.2953	13.9654	12.8745	8.68127	13.674	9.01478	9.88129	7.82369	6.45084	14.3469	13.1884	9.39956	10.2416	13.2468	15.2251	15.7465	15.6592	8.59119	9.49399	14.8743	20.1604	13.9794	18.3008	17.4896	18.4864	15.9625	14.9491	17.207	10.9581	11.985	12.8221	11.1094	11.1105	13.8125	8.99713
SMARCD1	971	37.8409	38.1953	32.4445	35.2974	33.9509	27.6956	35.2931	30.2279	30.0688	29.1863	20.9157	33.6501	31.9203	32.4355	31.0987	36.7609	37.3084	35.1791	29.4185	24.4656	23.0648	26.7865	35.8628	26.3432	34.2851	34.7981	37.3469	34.7513	37.944	35.5864	20.9023	25.7858	30.0336	26.9574	30.3464	27.5721	8.59885
KDM4A	972	19.521	23.8839	29.202	25.8097	25.7132	23.4211	27.8623	19.9139	16.5572	15.1596	15.867	25.7897	28.3743	19.1151	19.7811	23.5209	25.0648	22.169	29.5935	22.3272	24.9725	20.3164	21.833	23.0284	26.3523	27.4198	26.7996	26.3276	24.5682	25.507	27.7098	24.834	31.8889	29.899	29.9753	34.7595	11.4286
NFYC	973	10.0969	9.93104	12.7804	11.196	10.7693	13.1037	11.3733	8.84805	8.7027	8.46175	8.68401	10.3207	12.2295	8.88393	9.18147	10.0382	11.2737	11.3342	12.805	9.14926	12.697	10.5301	11.5711	11.9986	10.5448	11.4272	11.4783	13.8072	11.82	10.7229	9.30855	11.7132	12.7846	11.0793	11.8603	8.51206	4.70578
ZMYND12	974	0.179283	0.207589	0.187322	0.33124	0.238686	0.230485	0.145833	0.459802	0.144009	0.107736	0.528156	0.378099	0.258563	0.648415	0.127246	0.100805	0.19747	0.29908	0.194393	0.454279	0.355106	0.167292	0.136578	0.478713	0.256823	0.312057	0.036648	0.305938	0.241745	0.141558	0.309861	0.186166	0.081447	0.042547	0.01743	0.065087	0.48483
SLC9A3	975	0.430147	0.878684	0.622067	0.513283	0.835495	1.74289	0.456217	0.652717	0.630175	0.532271	0.516887	0.908419	0.902219	0.74824	0.622614	0.697339	3.46675	3.80992	2.68691	4.3087	5.23524	3.02488	3.39395	3.29647	2.05186	2.93704	3.04846	2.00671	4.81302	3.1792	1.18939	2.42139	0.862222	2.67335	2.45463	2.27692	0.823395
NGEF	976	1.10879	2.66618	36.3138	9.45298	7.77986	3.66444	3.56666	4.16301	1.63838	1.10505	1.18063	10.7427	7.43913	1.77125	2.8123	2.7926	4.95895	2.67097	5.54719	7.42131	5.31654	13.6359	1.77685	9.09384	6.34459	3.31689	4.53975	2.5835	2.79017	9.20744	4.14503	62.96	7.06352	15.0999	20.2234	8.24337	10.7284
ASPM	977	9.95978	15.6218	4.67956	13.1377	7.00053	1.67192	14.9589	5.59908	11.6294	7.86581	4.7892	14.3691	5.7693	8.06946	9.22416	12.3425	14.179	14.3188	14.469	3.06049	1.99553	16.3402	20.4236	18.608	12.2068	11.6427	18.7957	20.1103	12.3381	12.5447	4.40429	1.23607	8.12963	0.172719	0.307872	0.29113	0.84437
CD84	978	0.058503	0.07117	0.061586	0.068925	0.175539	0.255909	0.076614	0.035298	0.053754	0.095334	0.121439	0.038738	0.140435	0.168493	0.040441	0.080041	0.101466	0.022135	0.036067	0.121632	0.199317	0.034629	0.016324	0.042032	0.090539	0.057668	0.082743	0.013577	0.057829	0.068668	0.140011	0.050126	0.085775	0.132096	0.310629	0.216504	0.053083
ELOVL1	979	4.44569	3.50443	2.77289	4.25012	4.60071	2.74328	3.17225	2.35108	2.9395	3.95795	6.81126	3.06333	3.24508	4.96204	3.50453	3.91921	3.17758	3.45973	2.45782	2.41542	2.91044	2.77654	3.83571	3.12824	3.0625	3.85046	2.66616	3.20071	3.90396	3.04247	4.66658	2.06355	4.27157	2.29034	2.62145	2.3895	2.19703
SPI1	980	0.450546	0.561752	0.593186	0.652452	1.19769	2.33918	0.476733	0.333412	0.609209	0.493232	1.49856	0.229124	0.590821	1.07792	0.471689	0.65913	0.275751	0.393296	0.092047	0.478299	1.81764	0.3533	0.381279	0.27031	0.534979	0.568867	0.698335	0.101983	0.677852	0.68752	0.686547	0.710124	0.713344	0.693038	1.41537	0.688082	0.322814
ZNRD1	981	6.88981	4.19562	4.39869	5.14552	3.66967	2.84679	4.64172	3.56313	5.65431	6.68492	5.06483	3.60002	4.06896	6.91325	4.66424	4.43717	5.39618	4.80039	4.84556	2.54017	2.91903	4.60959	5.09236	3.9946	3.08047	6.74429	4.68782	5.7262	6.502	3.81656	5.31016	3.59681	6.59405	2.87456	3.6883	3.09845	2.27632
MPPED2	982	23.7467	22.3791	11.1498	19.6231	11.7451	2.73642	14.4061	7.71985	24.0273	25.8208	14.7253	35.0561	9.11157	15.1524	21.434	21.2722	32.213	32.0693	8.43583	10.6116	2.49172	37.1912	36.3009	22.0632	16.5073	16.8711	25.9372	20.7317	33.6042	21.3866	5.59477	32.4758	5.49589	10.468	9.43876	11.0413	18.5601
CLDN18	983	0.009304	0.0246	0.011348	0	0.009738	0.027126	0.022845	0.003698	0.035016	0.012635	0	0.023727	0.008826	0.022139	0.036178	0.054609	0.084917	0.138714	0.050825	0.017343	0	0.070944	0.087617	0.110053	0.021822	0.026849	0.04327	0.05241	0.076699	0.03074	0.023045	0.032612	0.020476	0.006772	0	0.017216	0.021339
ZBTB11	984	5.81966	6.15288	6.01104	5.81394	6.35021	5.07159	6.01684	5.23731	5.57356	5.12155	4.76949	5.63983	6.80837	5.19557	6.10995	6.10149	6.20322	5.83982	7.97939	6.9857	6.09122	6.92573	6.96644	7.66472	7.68676	6.72175	8.35149	7.97692	5.69802	8.09193	6.75602	6.58391	7.20727	8.05569	7.65584	8.4184	10.3803
ATXN3	985	1.89872	2.12802	1.73115	1.95751	1.93711	2.19672	2.01469	2.83708	1.87118	1.66693	1.79484	2.32308	1.9975	2.21396	1.62226	1.54108	1.79267	1.91081	1.4906	1.82149	1.72011	1.93464	1.88805	2.09329	2.16638	1.75402	1.97901	1.40019	1.73728	1.92113	1.94752	1.31467	1.78991	2.36885	2.03469	2.02773	3.21256
GOLGA5	986	9.67933	11.2351	10.622	10.4082	10.4066	9.64606	10.2371	7.88917	8.11469	9.48901	9.61795	10.2687	10.122	9.02059	10.1318	9.59328	10.2901	9.79128	9.21727	7.16942	9.05164	7.75311	9.39841	7.22911	13.1515	10.1213	11.2552	8.44642	9.10015	12.618	9.72832	9.49039	9.96323	9.80629	10.4602	11.0919	8.62026
FGFR2	987	17.6292	18.1978	8.39219	27.1256	13.1854	2.37628	22.0608	1.13099	9.26075	10.5611	6.42145	26.5024	10.1202	8.30315	14.9948	18.0471	15.4919	12.5689	14.069	1.7299	2.76885	33.5035	22.0402	24.2508	12.3757	13.1866	16.1817	27.7299	12.2816	12.9111	13.6956	2.87281	7.53327	1.96907	4.01546	2.39243	1.87047
LRRC40	988	23.6707	16.9292	16.8941	22.0791	17.8854	12.0638	20.3294	28.1735	21.42	24.1839	21.4776	18.0566	20.2549	17.6769	23.5315	16.6109	12.7905	14.279	15.5618	19.1989	10.1842	17.4416	14.8558	16.5595	13.5322	14.9557	13.1769	16.6091	12.79	13.961	25.1547	13.884	16.4647	16.3311	12.7966	17.8087	51.742
ISOC1	989	14.2763	13.9147	21.0354	25.2521	15.0345	12.5149	18.9452	18.9579	22.3246	19.2956	22.9701	17.2267	20.0765	16.4885	16.4536	12.389	10.459	9.88795	19.2391	12.6281	12.5879	11.8036	9.68597	17.9951	9.99794	10.9272	9.8735	18.1397	10.5576	8.96708	9.50228	19.3253	19.166	9.16157	7.46732	6.72496	27.724
EML1	990	14.8587	15.251	4.76439	4.3607	13.1979	3.80572	6.4613	9.83535	12.9444	9.6814	5.71096	5.6484	8.35696	14.5862	10.868	15.1506	11.9158	11.4507	5.09938	9.87355	3.36231	4.34505	9.1888	3.93295	18.2711	17.7956	18.6397	4.24315	16.6597	15.7946	13.2801	4.33207	4.76614	38.8377	45.4392	51.7833	3.47644
TRMT11	991	7.85029	4.97683	3.27534	4.74313	3.51503	2.16683	5.28813	3.70438	7.31945	7.04638	5.0942	3.8788	4.21936	7.57952	4.27198	5.07489	7.22403	7.88249	4.47202	2.81382	3.60972	7.72897	8.78598	7.87602	5.70388	6.51739	7.64468	4.62859	6.39591	5.67747	4.54202	1.45435	4.0836	1.4206	1.14733	0.962964	3.28249
THUMPD1	992	15.7674	14.7252	10.451	10.5424	12.1969	9.27107	12.327	8.43619	16.7009	14.1813	12.6815	9.95279	11.6861	17.7701	13.3222	13.1612	10.1996	11.2835	9.02681	5.86718	8.35133	7.58156	11.5015	7.79022	12.7391	13.7038	13.5883	8.55135	11.3343	11.5533	16.8231	9.39468	12.3398	11.7719	11.2049	10.9898	12.6622
C9orf30	993	12.5251	11.8741	17.4081	13.9951	13.0267	10.2281	15.9867	16.8455	12.5526	13.46	11.8099	14.7103	14.7866	12.9132	14.0616	12.0968	12.6869	12.8693	15.309	15.3808	11.5963	12.2872	10.8128	12.579	15.1886	12.5926	11.456	12.5694	11.8347	16.0429	11.6834	10.4991	11.6456	10.3155	10.7695	10.3475	14.4526
KIF26A	994	8.44052	13.8122	10.2316	10.2314	13.5984	3.69759	11.7981	3.24953	2.82657	4.50929	2.6906	15.4015	8.38991	3.2942	7.4707	16.9511	7.86606	5.83358	7.78971	2.82902	2.22908	7.43625	8.52471	7.67964	10.5853	5.31105	14.2497	7.87543	7.62414	12.4861	11.0172	20.8651	9.26229	22.2403	62.3137	30.7572	2.88994
ATG2B	995	2.57645	3.67657	2.68732	2.902	3.35364	2.55237	2.65288	2.03294	2.01131	1.66651	1.82286	3.36981	3.51152	2.13189	2.3608	3.26789	3.01623	3.08966	2.51586	2.2694	2.53073	2.88617	3.16283	3.03999	3.44874	2.83081	3.42695	2.22877	3.15225	3.17076	2.65249	3.4057	3.1368	3.80417	3.63537	4.92362	2.71138
ARFGEF1	996	4.48994	6.75128	3.65664	4.07036	5.48667	3.83639	4.12297	4.42598	4.82085	4.25562	3.50507	5.4066	4.35385	4.19963	5.18672	5.59884	5.86807	5.75629	3.63241	4.75542	3.34262	4.67943	5.56658	4.82714	6.33605	4.49209	6.05732	3.35036	5.07062	6.40178	4.04213	4.26466	3.04513	6.57216	4.94122	7.29557	6.36341
ACSM2B	997	0.036384	0	0	0.011383	0	0	0	0	0	0	0	0	0	0.012904	0	0	0	0	0	0	0	0	0	0	0	0	0	0	0	0	0	0	0	0	0	0	0
ZFAT	998	1.37052	1.55175	1.40579	1.46405	1.37186	1.27595	1.4669	0.953102	1.29108	0.939957	0.899643	1.40102	1.52222	1.26714	1.17494	1.47248	1.78922	1.68385	1.76767	0.807411	1.22474	1.35958	2.14857	1.29759	1.81555	1.87421	1.79997	1.84047	1.88655	1.68033	1.1978	1.42829	1.64149	1.6388	1.59319	1.63272	0.632253
MTFR1	999	6.38746	4.55822	4.06095	6.4524	3.92063	2.928	5.71844	5.50377	5.2588	6.35466	4.7267	5.38448	4.30349	5.63213	5.09261	4.8574	4.32183	4.16156	5.17828	4.0175	2.90312	5.24205	4.90074	5.11141	3.40884	4.57174	4.37116	5.98233	3.97783	3.73738	5.13959	3.22485	5.95674	3.4696	2.24959	2.53811	3.67672
STAG3	1000	1.78596	2.70887	3.08498	2.36581	3.24304	4.59018	2.59953	3.05032	1.77463	1.42343	1.76411	2.88543	3.05435	2.37597	2.04272	2.45998	4.96555	4.72543	4.12633	6.30035	6.85381	5.27122	3.88064	5.1236	5.82864	3.88341	4.56899	3.49714	4.57192	5.31551	4.47377	5.51038	3.5656	6.94353	5.99961	5.86308	3.64482
FECH	1001	3.80066	2.98133	2.70191	3.11417	3.91021	4.24481	2.29872	1.93893	3.78092	3.78843	9.68905	2.83449	3.10833	5.20912	2.87247	2.90021	3.38871	3.26818	3.08022	1.81847	4.96378	2.75412	3.05343	3.19191	3.30882	3.63099	3.54206	3.40004	3.79345	3.35805	3.43837	2.52805	2.30369	2.64789	2.7059	2.44391	3.07885
MYO9A	1002	2.18403	4.05205	4.39438	3.29559	4.7687	3.26373	3.61117	2.69143	1.86898	1.39342	1.75507	4.57208	4.1918	1.91904	2.9656	3.56392	4.42933	3.59152	4.34072	3.89644	4.08681	4.2285	4.22558	4.54757	6.25541	3.64191	4.69593	3.842	3.49383	5.53451	2.91666	5.78656	3.55777	7.88515	6.66013	8.75986	4.10081
DDX3Y	1003	11.2467	11.1552	8.89694	10.579	9.96192	9.11192	11.4373	7.38337	11.5088	10.2407	10.9269	10.6878	10.881	13.311	10.0852	9.88447	9.68037	11.1041	9.67851	5.25221	8.1871	12.1632	10.4774	12.6612	10.9099	11.451	10.1626	7.76421	9.83445	9.61164	0	0.080037	0	0	0	0	0
PFKP	1004	5.92668	6.34638	11.9311	11.9214	6.24739	12.0174	7.90781	2.73313	5.66404	4.8752	5.2401	10.7371	6.60032	6.88034	4.90768	6.03728	7.97328	8.91046	8.11502	7.42857	10.2233	12.6575	6.56215	14.8723	4.0001	8.85028	6.73736	11.8917	12.3519	6.06334	6.70609	19.1946	6.22284	10.8341	7.95082	16.451	14.3477
IDI1	1005	60.1142	41.721	32.2721	41.1707	39.3514	18.7511	45.737	59.2962	46.9963	76.4774	40.8097	37.3149	41.5947	37.4266	60.1668	44.1636	29.3764	27.9392	39.4422	46.6154	22.1879	36.0087	38.7338	32.037	29.4286	30.1163	33.6028	39.7112	23.7729	35.1078	68.6536	27.3751	38.4118	26.4033	16.1214	16.0322	115.821
SP100	1006	0.316751	0.199918	0.182084	0.210076	0.298291	0.155426	0.149863	0.150525	0.198297	0.218976	0.308454	0.180835	0.158382	0.300239	0.193888	0.24074	0.083006	0.129902	0.07415	0.10161	0.184341	0.11619	0.112283	0.13534	0.165842	0.17566	0.188669	0.115679	0.132504	0.196141	0.153901	0.079163	0.127326	0.191148	0.246834	0.117782	0.119107
KLF6	1007	15.4708	14.6704	12.7796	14.3396	16.3853	15.9053	13.6283	24.1848	16.734	16.1589	21.5912	13.3647	16.8721	16.1483	16.883	14.0274	28.4066	23.8255	22.8535	45.6377	22.1502	18.5897	34.6332	22.0342	22.9445	20.3693	27.8727	25.4625	21.5631	26.4881	10.2438	8.65847	11.9863	16.3759	10.4183	14.3047	36.905
PPAP2A	1008	7.6782	6.85914	6.93543	8.05851	8.34348	5.46904	6.77376	6.18925	7.18003	8.2321	12.0972	6.38415	6.96458	8.71811	7.00846	7.54173	7.82113	7.13867	6.08721	5.79631	6.51761	5.69343	6.9099	7.73775	7.98953	7.96887	7.80919	5.29995	6.023	7.3439	10.1293	5.29517	6.72972	6.50332	5.53392	5.26992	8.8028
NEO1	1009	18.8284	32.5703	25.5804	19.2229	62.4694	26.8435	27.6685	27.705	8.37839	7.8956	7.16216	24.4017	45.605	16.9758	22.4612	34.0064	34.1862	24.2901	37.8555	51.2148	40.5725	25.7699	26.9691	30.2057	116.898	49.6679	58.0185	26.4067	22.1723	80.1336	32.9088	22.5167	26.2897	50.2827	56.1122	24.6451	20.8679
TRAM1	1010	22.5822	15.4446	10.0996	17.2242	15.0866	8.47014	16.8578	11.7048	24.0096	25.8478	31.8564	12.7886	14.3265	26.9055	21.8388	14.7659	8.59745	11.0609	12.0242	6.75319	9.52504	11.3164	11.0298	12.5003	10.3668	14.8617	9.87342	14.215	9.90386	9.66227	20.3959	7.14558	18.4414	9.18654	7.29034	6.92945	18.6118
PHKA1	1011	1.51289	1.46045	0.851289	1.75276	0.887115	0.436216	1.73143	0.553439	1.62733	1.37652	1.1471	1.53201	0.870771	1.52033	1.23305	1.27558	2.04392	2.09989	1.745	0.297154	0.308265	1.9979	2.43485	2.08504	1.19945	1.87063	1.83089	3.08548	1.90725	1.46098	0.738379	0.58578	1.59126	0.117277	0.059752	0.133417	0.334948
TNFRSF1A	1012	4.48489	3.54384	2.90812	2.09257	5.57242	3.43809	2.71359	2.1915	3.58974	5.08767	8.90936	2.09618	2.45687	7.5236	3.97646	4.18875	3.49642	4.50286	2.52163	1.4391	4.22155	2.71152	4.18928	2.08752	2.8495	5.28651	3.67683	4.03848	4.81788	3.53877	4.25168	1.32119	3.13531	1.99454	2.25615	1.56357	1.4316
CACNB1	1013	6.4456	10.3179	9.81391	6.40635	11.8587	21.5758	7.60562	14.328	5.67061	5.03553	4.37828	9.41161	10.4027	5.34393	7.81397	9.74092	10.7907	10.3365	7.2941	15.0116	14.5317	8.02702	9.66446	7.41633	9.1621	8.47407	10.4368	5.31068	12.4079	9.92274	11.3766	16.8778	7.55573	19.4977	18.2264	16.0206	9.26118
EVI5	1014	1.95132	2.11664	1.46159	2.04389	1.91915	1.57285	2.02435	0.858721	2.0608	1.74785	2.34384	1.78622	1.80484	2.63814	1.84868	1.90551	2.28125	2.2596	2.1873	1.15385	1.97653	2.36868	2.79092	2.63634	2.39659	2.65404	2.4341	2.36	1.82679	2.00933	2.09134	1.15046	1.8897	1.18581	1.05181	1.24047	1.41379
STOML1	1015	9.73368	7.36372	19.8623	10.7208	11.6142	19.6315	10.0904	14.8356	7.57273	10.5564	11.8618	10.7134	16.4396	9.02497	8.84396	9.19416	6.68396	6.45731	10.6279	18.1301	16.8837	8.53648	6.11161	7.70717	7.29745	9.43717	5.64182	7.48602	7.81924	6.27673	17.7033	30.7173	19.2104	28.427	21.035	17.2533	28.9596
PKM2	1016	317.031	219.722	215.14	278.025	198.056	167.909	246.712	270.882	322.606	276.618	219.272	222.592	185.619	411.441	229.006	247.853	255.831	257.039	210.661	245.086	185.625	224.991	261.17	184.248	156.046	338.939	196.107	300.535	301.329	174.791	216.634	140.049	195.274	129.547	133.384	114.668	139.655
DHX29	1017	9.44481	11.1104	8.68698	8.10779	11.0806	9.0907	9.14	7.97811	8.44055	8.5719	8.14766	9.98349	10.2691	7.817	10.2845	9.84782	7.50978	8.06209	8.02187	6.64968	7.71959	7.02326	6.97418	7.87957	11.917	7.63094	10.1804	6.90555	7.03024	10.596	8.60163	9.13039	8.22404	11.0662	11.8791	12.5184	8.53949
DNTTIP2	1018	13.4222	13.2147	12.4031	11.2663	12.1953	8.27263	12.8545	11.1167	14.3473	15.905	12.6867	11.4415	11.1105	11.8178	14.0482	11.8023	9.24977	7.75862	8.7593	5.31172	6.29449	6.87937	7.76729	6.93099	9.95366	9.19841	11.3614	8.78877	7.09038	9.9843	11.2748	7.98308	9.84948	8.30416	9.15213	8.30892	14.3912
METTL22	1019	4.84742	5.07948	3.80835	4.86715	3.7732	5.39079	5.07057	3.76584	3.95178	4.4864	4.96415	4.90244	3.47696	4.43523	3.77484	4.97928	6.27851	6.23063	3.27881	3.76757	4.44552	5.79756	6.19473	6.14476	2.85276	2.77571	4.41509	4.31612	5.65648	4.39497	4.99601	4.53883	5.57145	5.57577	5.69805	4.29557	3.85208
TP53BP1	1020	14.6169	21.2783	20.924	17.2475	18.9252	19.0645	17.6807	16.089	13.4777	9.1015	9.3632	20.2428	20.395	18.0044	12.6316	19.7018	24.602	24.1522	24.3101	25.454	24.0939	19.7643	23.5403	23.5623	25.626	29.1495	27.6316	21.0182	26.753	25.6946	16.2403	20.0505	14.4762	19.1849	21.5974	28.1802	8.97004
TRO	1021	9.28258	11.2846	17.306	11.3525	13.7314	16.4839	9.3374	12.8388	7.6423	8.28472	10.4584	13.5181	16.4674	10.6676	9.12719	10.4971	15.061	16.3191	15.8222	25.1562	23.1918	20.008	14.4174	18.7992	14.189	13.8327	12.8966	12.2939	15.7706	13.8663	15.488	23.6292	15.0214	22.0814	20.1501	22.9305	15.8754
RRP15	1022	4.5808	4.22074	2.55753	2.84514	3.58754	1.99651	3.09759	2.97226	4.40258	4.11146	3.31916	2.97851	3.39664	4.26759	3.63369	3.36157	1.79938	1.92741	1.36905	0.856413	1.04433	1.39246	1.91356	1.43013	2.33485	2.16004	2.73236	1.38319	1.66148	2.22364	3.27279	2.2538	2.47418	2.73557	3.26858	3.09723	3.76008
RHOA	1023	167.262	129.957	132.829	171.208	135.106	83.0269	152.737	140.63	142.644	164.553	187.038	134.962	114.932	179.815	144.422	136.499	114.949	111.965	114.81	88.0918	76.9706	107.537	113.081	114.177	97.5243	129.475	105.707	153.18	110.184	106.918	124.866	71.9966	144.153	75.0629	77.7395	78.991	69.5931
DHX8	1024	13.9721	16.8864	14.8264	14.9563	14.1361	10.0293	17.6611	8.97064	11.3036	9.08173	8.73378	15.5468	13.4299	12.9742	12.5387	15.9027	21.2697	19.0855	18.4639	10.0674	12.983	16.0327	21.3952	14.9948	18.5539	20.7971	22.539	22.0949	20.7921	19.1596	10.8712	13.3774	15.2928	12.3325	12.4206	17.1773	4.80348
PMS2P4	1025	1.23333	1.98122	1.96679	1.49842	1.936	3.83975	1.77174	2.90441	2.40392	2.31294	3.38201	1.98346	2.28356	2.39128	2.46235	1.64368	1.97367	1.75921	2.07748	2.59697	2.79066	1.94505	2.14061	1.71916	1.73601	2.06599	1.78418	1.94765	2.24263	1.68396	2.97827	2.67331	1.65996	2.24812	1.81035	1.64788	2.22788
PRKCZ	1026	6.31013	7.6636	12.1066	6.7348	11.4047	15.1004	6.77299	7.99322	6.69959	7.17999	8.65256	9.36022	12.1103	6.26025	9.02072	8.15848	6.55538	6.77024	8.53922	10.5133	12.9337	5.55165	4.69067	6.26242	7.97391	7.28584	6.40342	4.54016	7.45372	7.51092	8.78176	17.1715	9.71789	16.979	15.3445	15.3366	8.87558
ZFY	1027	3.4218	3.14041	2.48007	4.17768	2.72302	1.99449	3.30098	2.65497	3.60034	3.27551	3.99982	3.36366	3.19883	3.49913	4.03546	2.59241	1.96343	1.95222	2.52481	1.74597	1.68794	2.4171	1.94875	2.97383	1.49521	1.77082	1.39009	3.16151	1.80716	1.54509	0	0.007346	0	0	0.006683	0	0
IARS2	1028	18.3411	19.8044	16.3574	17.9772	16.8473	13.802	19.3417	12.043	15.4091	14.4067	14.1632	18.0372	15.6268	16.1694	13.9187	18.9063	16.9368	16.5217	16.8002	10.8872	13.2275	13.7236	17.867	17.8526	20.6145	18.8597	21.8362	17.1088	16.0296	20.4002	13.0534	13.8037	14.9453	13.5125	14.4933	13.9542	10.0309
SYT1	1029	23.8739	33.4141	37.7101	18.5838	46.9008	50.8722	19.9026	34.1267	19.1235	20.0005	20.2615	29.9928	54.8381	14.6219	29.1778	31.8217	33.8447	31.3224	39.1893	60.2556	79.4807	23.4914	22.144	43.5248	82.1534	42.4394	51.8781	14.5305	34.1313	72.5108	29.2149	43.581	25.8762	56.7453	46.4341	71.3655	56.202
NAV3	1030	1.20301	3.24701	8.32638	4.94698	7.48143	5.16049	4.75654	4.03996	1.02379	0.898243	1.33822	7.6281	6.95758	1.36952	2.67407	2.60782	4.58197	3.93446	7.98532	11.6285	8.58549	7.8858	2.22921	9.00959	11.8891	4.99943	5.14029	6.0676	2.81177	8.85165	5.13286	11.7358	6.04155	22.4767	9.59344	16.269	13.3991
IDH3G	1031	19.4101	18.0356	25.3795	20.5248	21.5362	26.1348	20.3663	22.9196	18.914	19.5395	22.6207	22.0698	21.958	20.1178	20.2299	20.1361	19.3591	20.6173	20.5816	25.8662	25.7389	21.2481	16.9047	18.1639	17.6869	20.9287	15.5593	21.4487	23.443	19.2185	27.7963	35.002	27.2439	25.9082	30.593	24.962	16.2295
ROGDI	1032	18.7471	27.6573	27.235	15.2125	26.6607	42.9766	14.4437	29.7206	24.8606	36.7516	27.7238	22.0936	25.1353	18.4078	32.7924	26.7921	27.1732	29.0045	17.3021	29.3249	32.6619	17.9975	17.9963	16.3435	14.9836	17.7113	16.1171	12.1498	35.7157	19.8721	29.1935	53.2882	18.9719	37.3823	40	46.9063	30.378
PDZD4	1033	40.2974	62.8504	106.398	65.0183	75.6694	158.657	55.9852	95.286	47.6391	48.8923	45.118	101.408	83.4474	40.6416	59.6464	59.8014	62.5581	59.322	64.617	125.992	135.966	67.1087	41.8562	64.8159	55.5772	49.8639	50.8965	37.3843	61.4262	58.8556	75.4426	194.373	69.2787	123.171	108.567	94.1364	96.5429
ATP2B3	1034	0.795036	1.69474	2.19788	0.613362	2.37931	3.77413	0.590027	0.18525	0.631257	0.568411	0.417005	1.18741	1.9342	0.98341	1.0869	1.54163	1.41799	1.30866	1.19151	0.722498	3.47333	0.954226	0.403504	1.42505	1.86467	0.976023	1.84615	0.273045	1.71685	1.97442	0.98694	3.4297	1.0661	3.7972	5.32572	4.6343	0.737237
ROCK1	1035	8.39343	12.4224	4.97816	6.68556	8.12609	4.79506	9.95206	3.44388	7.34408	5.83192	5.38704	8.37682	5.71748	6.81473	8.80983	10.6567	10.1765	9.3743	8.42346	2.82412	4.92739	8.72901	11.3437	7.48449	12.1369	8.93553	12.183	8.35328	8.17388	10.9369	5.70429	3.32934	5.77442	4.59442	5.70894	5.56971	2.26038
CBFB	1036	25.2331	17.8787	10.4742	13.7967	15.7081	9.30631	17.5164	9.93533	24.7184	22.1945	20.4122	11.883	14.2012	19.9867	19.1408	18.9515	13.1684	14.1066	14.3768	4.86626	7.60234	11.341	16.774	11.3982	20.2023	20.564	20.9329	16.5818	14.7434	17.6189	21.5899	6.17211	16.0255	11.3246	16.7633	10.3449	10.9399
PDK3	1037	2.05528	1.60584	1.63686	1.86031	1.22324	0.700382	1.79014	1.05056	2.09371	1.58506	1.84142	1.47224	1.44695	2.24596	1.93926	1.70833	2.10533	1.85874	1.30015	1.13895	0.9721	1.52326	2.39642	1.44669	1.57692	2.27569	2.04201	1.58319	2.19179	1.51371	1.00243	1.10184	1.02203	0.366781	0.428623	0.276833	0.865982
HYAL2	1038	12.809	8.50539	9.68458	9.30653	10.6498	9.19975	7.82036	9.79726	10.3001	12.6859	14.3563	8.30747	9.77093	15.5752	9.09342	10.4875	7.08484	9.17208	7.40999	9.85166	9.64287	6.95898	7.77148	6.0787	6.13649	10.7864	7.41137	8.58676	11.079	6.19994	12.1239	10.4535	11.727	11.0016	12.1466	10.1158	7.51614
HDAC4	1039	1.58848	2.87649	2.55272	3.04753	3.07544	2.88163	3.06567	2.10451	1.71514	1.21404	1.33862	3.00294	3.04991	2.33204	1.62454	2.53644	2.62606	2.49412	2.69937	1.718	2.43912	2.01437	2.49637	2.84991	2.64867	2.64236	2.48581	2.16872	2.57107	2.29108	2.43463	4.17882	3.97385	3.55938	2.61534	2.67645	2.24772
RASSF1	1040	5.01409	5.33357	5.5955	5.24828	5.95008	6.247	5.41503	4.38013	4.38762	5.00791	7.25211	6.07544	5.56022	5.22235	5.18113	5.63155	13.9363	12.2066	6.43481	5.16271	7.1671	9.88735	15.6785	9.04039	6.41062	7.83358	10.2794	9.97231	12.3232	8.49919	5.04644	8.74117	4.25073	7.12712	6.55539	5.93709	4.17665
FGFR3	1041	104.067	24.5476	27.6491	22.1945	31.5825	20.2038	62.0367	12.252	1.71001	2.9309	2.50939	19.4493	38.3056	81.9545	8.56723	52.0513	7.13436	2.0344	57.6467	18.3002	11.2192	24.9669	58.6473	21.3339	71.7649	180.037	137.007	67.2246	6.44717	44.0986	62.3145	1.23346	35.5564	0.315559	1.12445	0.117509	10.2118
IFI35	1042	0.498082	0.405105	0.487104	0.251608	0.970084	0.490831	0.429327	0.160277	0.22851	0.836925	1.29623	0.201293	0.275332	0.785932	0.519215	0.655639	0.144287	0.206752	0.313346	0.148026	0.562861	0.237764	0.272463	0.255648	0.223635	0.326418	0.162166	0.216466	0.211997	0.240296	0.496112	0.439775	0.700166	0.693653	0.715665	0.43127	0.247363
HEATR6	1043	8.70366	8.81326	7.85156	9.68243	8.30815	6.09297	9.97357	6.38205	6.73594	5.58662	5.75775	8.79873	8.11124	8.58398	6.0787	8.43745	10.7848	10.0379	10.3122	5.62506	6.78709	8.62632	12.5191	9.16596	10.1511	11.7324	10.3604	11.1334	10.4719	10.7167	6.69517	6.49229	8.32737	5.87134	7.09067	6.50221	2.97559
COASY	1044	16.32	15.8815	14.2774	16.0202	14.7906	16.4438	16.394	13.1676	15.8495	15.3591	14.7006	15.012	12.8725	16.8967	13.4423	16.2448	22.5909	21.1339	18.8063	16.1513	18.0828	17.092	20.8097	16.1539	14.4614	19.4025	17.501	22.9914	21.8484	16.9592	13.1555	13.7698	14.8932	11.1327	12.6497	12.4053	7.91082
PLEKHH3	1045	1.5065	1.9832	1.38384	1.63737	1.85333	3.85912	2.4706	3.16405	1.63061	1.33461	1.899	1.39594	1.49226	2.86703	1.40279	1.67937	1.89174	2.24707	1.63023	1.44421	1.72995	1.21334	1.83173	0.90658	0.627829	2.75401	1.55194	2.46309	3.85336	1.18361	2.91041	0.523743	3.30626	0.848379	1.05692	0.997998	0.445876
MEF2A	1046	5.65032	6.90246	8.2124	6.65273	7.94252	5.52044	6.02334	8.92878	5.68728	5.59871	7.34453	7.22654	8.22071	6.21735	6.50881	6.42305	6.15739	6.45662	6.1613	12.067	7.42009	6.40266	5.80282	7.20021	8.39261	6.90941	7.56619	5.33539	6.19883	7.96125	6.70305	10.1075	6.70571	9.11746	8.15525	8.92637	26.1089
OTUD5	1047	16.9631	18.3394	21.8604	18.5938	20.2396	29.0021	20.2367	23.0204	17.9715	17.1997	17.6061	20.6278	18.7965	18.9052	19.5323	20.344	15.3887	15.7675	16.2248	17.5693	18.078	14.2158	15.5513	13.4067	13.3499	14.6674	15.6308	15.8557	15.9201	13.802	15.9338	22.056	18.8246	17.015	16.3359	15.5812	12.3281
TFE3	1048	5.96972	7.92967	6.92517	6.66872	7.50591	9.35009	7.25344	6.87785	6.01662	5.66145	6.12459	7.31716	7.052	7.00932	5.64828	7.10768	9.1177	9.24624	8.65534	9.02185	9.91671	7.81782	9.85201	8.66052	7.95314	9.14934	8.79707	8.83393	9.96552	8.99833	7.3146	8.13801	6.98974	6.65695	7.39153	6.05749	4.73393
TBC1D25	1049	4.75104	4.53354	7.51607	4.79586	6.32835	7.99052	4.93616	5.27128	4.09512	4.10091	4.70514	5.64774	7.5555	4.24263	4.68317	5.36878	5.88934	6.02386	5.52968	6.97308	9.02792	4.43159	5.41089	4.54967	5.47138	5.79783	5.83514	4.41951	6.40861	6.05152	7.17673	10.4513	6.21311	9.81868	9.90236	9.58631	4.28182
ACSL4	1050	6.25822	6.29316	14.2144	8.40284	10.6412	13.3556	6.18364	16.7824	6.50677	7.60587	8.25545	8.21672	16.8964	5.83123	9.08096	6.55307	6.25876	6.79011	13.3936	26.7202	19.6407	8.86454	5.41139	12.3751	9.46309	9.38166	5.66563	4.77765	5.47358	8.503	18.4135	14.5838	10.244	17.1898	12.7433	18.4903	65.9646
INPP5A	1051	11.7408	10.7225	10.1578	9.98666	11.9283	9.71759	9.24632	6.1084	11.2571	12.0844	11.8431	8.85254	11.6093	10.7527	10.682	10.5301	9.62488	10.3081	8.2907	10.4236	10.5089	7.21411	9.58902	9.2807	9.20248	12.5323	10.2154	7.90058	11.2786	9.55225	7.39759	13.2799	7.5527	7.2594	9.00502	11.0239	13.4205
GPKOW	1052	19.3589	19.1417	18.9958	18.4351	17.2756	17.9202	20.1069	17.185	16.9618	17.0519	16.2336	18.2324	15.1831	18.294	17.984	18.6918	18.6169	18.5336	16.3827	13.6819	15.0541	14.5033	16.3801	14.2351	11.1681	16.1585	14.8755	18.1692	19.2722	15.7783	15.0928	15.4301	15.376	13.4858	14.0667	11.6234	7.49456
GRIPAP1	1053	6.28336	11.1957	10.9517	9.00128	10.4556	17.1269	9.15159	8.51026	6.02451	6.04459	5.81024	12.2896	9.71788	6.79742	7.93556	10.064	11.2861	9.78682	8.77722	9.20482	12.4279	10.468	9.5548	9.81238	9.69189	7.57595	10.6028	6.79047	10.1541	10.6376	8.37999	15.17	7.87257	12.0309	12.5789	11.839	5.05201
FTSJ1	1054	17.1714	13.9206	16.0229	15.5384	16.4222	15.1589	13.9859	10.9247	14.1059	17.7465	12.9089	14.352	15.822	12.7513	15.5248	15.4966	12.3618	12.7573	13.1076	10.9907	13.7192	11.4744	12.6185	11.5153	12.9912	12.3717	12.2047	13.3797	14.4147	12.357	12.6038	15.3372	13.4433	15.7937	16.1677	12.7042	9.65046
PRR11	1055	4.78357	14.8704	3.28765	6.83365	6.37953	2.58774	9.59725	4.40507	5.0779	3.26171	2.69581	10.5743	4.48606	5.94479	4.49772	10.6966	19.6298	19.0412	10.1826	5.75841	4.83071	15.7888	23.96	12.9695	11.6536	8.97482	18.1108	13.7601	17.7248	15.8897	2.45976	0.803091	4.39841	0.536025	0.648637	0.576628	0.679248
REEP1	1056	29.4322	32.4862	60.3127	28.0685	53.3477	54.7515	26.1682	53.3533	22.9273	33.2016	34.5647	35.8015	69.4812	24.0424	43.0654	36.1899	24.0494	24.8597	43.8157	101.103	69.5786	25.3441	16.5545	37.9758	45.3769	35.3486	27.8691	16.4569	22.7674	42.0585	53.3931	62.599	42.6369	65.7317	58.0933	60.2574	142.836
ATP11A	1057	2.00229	4.90366	1.6519	2.6423	2.67748	1.69277	2.89946	1.77836	1.69961	1.49129	1.39966	3.5293	2.49538	2.60293	2.39181	3.76735	4.99152	5.02042	2.94437	2.59301	2.07564	3.44455	6.92705	3.61947	3.41694	3.73751	4.94984	3.45563	4.26116	4.36259	1.42628	2.33394	1.8433	1.78325	1.89719	2.39239	0.829084
POLR1A	1058	4.45935	7.34853	4.34447	4.59439	5.87674	5.46533	4.99595	3.06596	3.88787	2.1961	1.86194	6.5234	4.64102	4.49175	3.39066	7.07513	9.1672	8.64045	6.70618	5.20463	5.55396	6.56764	10.7362	6.10157	8.0794	9.19404	10.0182	8.06638	10.1161	8.28352	5.75822	6.6872	6.21122	8.3919	9.13715	10.4369	1.98554
LAPTM4A	1059	97.3377	67.4091	60.4679	62.8454	87.8862	41.4422	63.4298	50.9444	86.7676	108.184	162.793	46.2373	70.6037	113.222	85.4556	76.7961	51.2158	54.2261	72.1196	33.7679	50.6618	44.7161	58.0738	55.7113	64.4361	91.3721	61.5724	60.2266	64.5963	69.3962	126.37	32.6004	82.6156	45.2202	42.9823	41.5953	60.169
TTC7A	1060	1.37699	1.56957	0.806908	1.00429	0.925117	1.49291	1.22087	0.603696	1.5044	1.12724	0.988458	1.03717	0.86777	2.09682	0.949446	1.16589	1.47136	1.65139	1.33559	0.965851	1.62244	1.29146	1.70269	1.37716	1.04796	1.97275	1.68769	1.37262	1.78232	1.13853	1.63464	1.48663	1.58855	0.924146	0.953893	0.531339	0.519459
IP6K2	1061	20.9076	20.8052	32.605	22.1996	23.9357	28.6347	20.8096	22.7053	19.168	22.7708	21.9786	23.4788	26.3801	17.681	23.7615	21.3258	22.351	21.3784	21.398	20.5762	25.7859	21.7271	19.902	19.6353	18.4152	17.9268	19.0934	17.4369	20.8218	19.1347	25.62	35.9922	27.7189	28.3142	24.475	27.3869	22.964
STON1-GTF2A1L	1062	4.80395	4.15338	1.94654	4.20024	2.54104	0.937209	4.59108	1.1218	3.27638	2.71647	2.11907	2.93847	2.52927	3.42755	2.67528	3.94921	8.08481	8.25864	7.28327	1.56171	1.65542	6.59504	10.5088	7.34638	7.18283	9.61912	9.59962	8.78447	7.6915	6.87953	1.7805	0.346797	2.38349	0.267107	0.793591	0.416095	0.477416
SRBD1	1063	5.81614	5.38833	3.79981	5.84906	4.41078	3.15059	5.88092	4.63214	7.31494	5.05387	5.30619	4.97143	4.64991	6.44495	4.71118	5.48371	4.39917	4.29694	4.50868	2.62916	2.91268	4.01025	4.9154	3.52173	4.58707	5.19603	5.96991	5.22732	3.94102	4.76326	4.45803	1.47463	3.93265	1.78977	2.20439	2.20795	3.15666
CYFIP1	1064	12.4119	12.3837	9.80034	11.3958	11.8719	7.66416	12.7936	9.10736	11.3396	9.97671	10.9375	10.0555	10.2692	16.84	10.1474	12.567	13.8231	13.2645	14.1331	7.88127	9.19153	12.3111	17.4286	11.151	12.5058	19.3425	14.6873	17.4062	14.8738	12.8836	13.2877	6.99813	14.8801	8.77421	7.34312	7.35129	5.61934
KIF2A	1065	27.1986	30.7779	27.9499	29.5333	28.8799	19.1016	31.5115	21.8646	25.9814	20.9117	18.0995	28.995	27.9667	20.6792	26.9531	28.5318	28.4113	26.5369	34.4816	26.1835	22.3781	28.1221	27.6001	32.5621	35.2619	28.8738	33.1347	31.9385	25.8965	34.6132	25.4953	20.8934	24.8707	30.2265	28.9945	32.7904	30.5829
RASGRP2	1066	0.393769	0.626781	2.84016	0.737783	0.865862	1.07103	0.392568	0.186881	0.317675	0.507553	0.480957	0.61721	0.842235	0.496195	0.477077	0.653329	0.687266	0.8472	0.449986	0.761749	1.31597	1.38267	0.516781	1.43637	0.549069	0.590144	0.70157	0.379354	0.926795	1.02608	1.12124	5.15155	0.808633	3.14165	2.7532	1.30188	1.36626
PSME4	1067	8.95728	9.54164	7.49367	7.04291	7.97676	4.08963	7.4514	6.12566	7.17712	6.69119	5.93266	7.24137	7.39024	7.33722	7.50648	8.84568	8.16981	7.9879	6.75848	5.22056	4.09284	6.01526	8.16786	6.41769	9.2463	8.33053	10.5759	6.22676	8.22559	9.56096	7.02959	6.53702	6.56044	6.66178	7.40896	8.21896	6.44676
IFT80	1068	6.09015	6.29415	4.12117	6.93598	4.37867	2.78504	6.88062	5.66417	7.49091	6.50267	6.49505	6.45038	4.27599	6.70174	5.62441	5.2467	5.36976	5.61497	5.5514	3.70324	3.14658	7.54569	7.11913	7.89678	5.82198	5.12894	6.42705	6.37591	4.5717	5.33428	4.4547	2.4878	3.93852	2.97789	2.37955	2.06471	6.26795
SIRT2	1069	6.02827	6.37632	9.7537	7.90196	9.09274	12.6498	7.59418	9.98792	5.45747	6.69949	8.97511	7.91387	9.30652	6.68081	7.58396	6.51162	8.70529	8.431	10.2978	12.9957	14.2828	8.73589	7.24014	9.11595	7.50327	8.00644	6.62428	9.92948	9.11388	8.62602	16.3648	13.16	10.5934	10.1433	10.1958	9.56103	9.95507
ERLEC1	1070	19.1291	15.9375	17.3423	17.1791	15.2188	16.0572	16.7863	16.4313	19.0736	21.5935	27.1864	16.8976	17.9018	18.0825	19.8202	16.5974	10.8018	11.6106	13.4406	8.93325	12.9821	11.8541	12.2277	12.2845	14.276	13.3714	12.5479	11.1064	9.48048	13.0964	20.802	13.1522	14.9768	10.6366	12.7868	11.1646	21.8965
PPP2R5B	1071	8.74145	11.4309	18.7536	7.9274	16.9239	24.0828	7.53926	17.3032	8.39934	9.60484	12.0654	11.6073	16.7606	8.79209	12.099	11.0022	11.9899	12.2864	12.1194	27.1742	23.8282	9.93018	7.97544	11.1967	12.4989	12.8059	11.1572	6.32025	15.3685	13.1014	17.2152	28.504	10.4804	23.9358	26.9797	25.4015	18.377
PYGM	1072	0.057184	0.030272	0.201271	0.026684	0.247383	0.109614	0.021277	0.048685	0.02681	0.06851	0.297765	0.047384	0.067942	0.490683	0.050466	0.026753	0.024258	0.073214	0.01895	0.051384	0.213944	0.018106	0.030121	0.137881	0.088017	0.257076	0.024206	0.016682	0.151922	0.047395	0.283159	0.009691	0.03973	0.087317	0.068662	0.07136	0.017771
PAGE1	1073	0	0.05237	0	0	0	0	0	0	0	0	0	0	0	0	0	0	0.06029	0	0	0	0	0	0	0	0	0	0	0	0	0	0	0	0	0	0	0	0
PITX1	1074	0.024941	0	0.020372	0.085443	0.096035	0.019584	0.016405	0.056687	0.010477	0.022681	0.291216	0.027649	0.023765	0.043908	0.010824	0	0.018191	0.1231	0	0	0.009935	0.031696	0.017477	0.01	0.011413	0.008829	0.018663	0.009779	0.256375	0	0	0	0.009065	0.007255	0	0	0
TRPC7	1075	0	0.01127	0.109215	0	0.02359	0.850452	0.010918	0.012748	0.014137	0	0.086137	0.061676	0.258273	0.011882	0	0.023142	0	0	0.178438	0.019544	0.512839	0.114374	0	0.214618	0.0308	0	0.020078	0.013195	0.023869	0	0.370396	0.689971	0.086631	0.633542	0.08724	0.078117	0.319756
MAST4	1076	0.350093	0.637571	0.879852	0.737571	1.01639	2.76525	0.697986	6.21211	0.473927	0.252549	0.676355	0.779365	1.04421	1.09158	0.367993	0.618016	1.2658	1.17524	1.26212	18.7675	3.65606	1.19652	2.13206	1.44827	1.25224	1.88356	1.14196	1.23689	1.48205	1.40514	0.990498	0.539993	0.855964	0.80883	0.533132	0.514583	11.1134
GPR116	1077	1.94212	2.17233	2.92602	2.33435	3.05921	1.51418	2.4422	1.34839	1.53528	1.80191	2.37104	1.86707	2.36007	3.2062	1.85471	2.08324	1.58691	1.32721	2.5183	1.9824	3.1799	2.08152	1.73129	2.42923	2.84302	3.23636	3.05386	2.25941	1.92643	2.95949	1.15832	1.14133	1.24419	1.34049	1.50455	1.46466	1.54371
SDK2	1078	0.619556	1.28215	0.632461	0.733828	0.957305	3.26715	1.03171	1.09931	0.86732	0.182619	0.437491	1.18433	0.880533	1.70331	0.41688	0.924637	0.969539	1.79113	1.07024	2.03941	3.24436	0.966612	1.58611	1.04583	1.14349	1.34064	1.50393	1.02124	1.86224	0.982925	0.765302	0.998093	1.43085	0.992629	2.31129	4.75385	0.373634
ADAM7	1079	0	0	0	0	0	0	0	0	0	0	0.009695	0.008844	0	0	0	0	0	0	0	0.009613	0.007988	0	0	0.019192	0	0	0	0	0	0	0.004828	0	0	0	0	0	0
NUP133	1080	22.8057	20.2837	18.7771	21.5115	17.1516	10.7433	21.138	12.469	18.2837	17.3155	13.5719	18.0899	17.1688	19.4637	16.4815	19.3433	17.957	17.6499	18.3736	13.0767	11.5822	15.8613	18.4842	17.3469	19.0419	20.2839	19.8767	22.4044	17.3323	18.1143	12.7029	12.4304	16.2758	10.8485	12.5948	14.5441	8.52265
NUCKS1	1081	146.347	125.826	98.7802	131.005	104.138	67.8613	129.349	101.805	183.862	151.455	137.708	117.605	109.971	137.621	132.231	116.816	89.7438	99.8552	113.952	78.7014	79.5383	86.7825	99.7805	106.022	104.645	115.856	113.185	107.234	92.4187	99.9865	87.9069	59.384	85.1104	63.4134	62.0233	61.4124	89.7516
VPS35	1082	44.3047	38.6417	36.7665	42.3635	37.3326	26.4939	41.4143	36.3813	42.219	39.5096	35.0828	36.8817	38.9801	42.1257	37.8686	36.4875	35.6138	36.9866	39.0778	30.5852	29.7362	30.6503	36.3325	36.6066	37.9253	41.5059	39.3368	41.6473	33.8167	40.4302	33.8521	25.7639	34.4843	25.0745	24.8399	27.9308	23.4971
DNAJA2	1083	37.1563	31.1425	34.3568	31.8339	35.1558	30.9397	33.2576	35.5891	37.1934	38.9919	39.3529	30.0019	34.7789	35.0203	38.997	33.9588	25.9907	25.1116	27.069	25.8028	24.2936	23.0538	22.6644	25.5042	29.6597	28.092	28.6306	24.4044	24.7816	28.1535	33.9127	26.0401	26.4402	27.9512	25.938	29.1924	44.0651
BCL3	1084	0.121902	0.168478	0.143011	0.112405	0.347899	0.441127	0.075494	0.503401	0.194736	0.145152	0.373564	0.195498	0.115775	0.256272	0.186605	0.192379	0.118094	0.11093	0.146165	0.899095	0.686496	0.154539	0.102575	0.278634	0.195932	0.397876	0.344387	0.116019	0.335957	0.292646	0.040903	0.129272	0.024118	0.124942	0.070369	0.076714	0.314862
KCNAB2	1085	0.902841	1.86473	2.56981	1.62873	2.41833	4.49671	1.81594	1.12924	1.11364	0.995024	1.05523	2.50761	2.30586	1.09223	1.43174	1.7608	2.04049	1.94241	1.96565	2.37025	4.29684	2.05465	1.66828	2.14606	2.1625	1.6476	1.75683	2.02781	1.78405	2.1507	1.53629	4.85351	2.03276	3.58741	3.47672	2.79772	1.22212
ABCC9	1086	0.77341	0.866695	1.43084	0.943747	1.05388	0.669216	1.24239	0.577897	0.507211	0.570441	0.825046	0.895442	1.26472	0.916186	0.902313	0.7648	0.489349	0.528957	1.85919	1.02203	1.28596	1.14482	0.643312	1.31339	1.12633	1.04546	0.941854	1.81714	0.682668	1.00495	0.675881	0.508861	1.45497	0.541588	0.676022	0.698817	1.18623
GAL	1087	0	0.028022	0.233272	0.128548	0.028541	0.418712	0.079979	0	0.104029	0.037536	1.17566	0.181379	0.207988	0.05829	0.035827	0	0	0.030951	0.217122	0.098569	0.19596	0.069307	0	0.1315	0	0	0	0	0.058549	0	0	0.127873	0	0.047702	0	0	0
CLEC2D	1088	0.826319	0.796999	0.483552	0.706245	0.550539	0.725642	0.814888	0.665151	0.59719	0.693934	0.972581	0.71585	0.484862	1.00445	0.513842	0.507473	1.57011	1.37567	1.10492	1.07823	0.783459	1.93849	1.76289	1.96751	0.981484	0.855799	1.28298	1.37607	1.22448	0.948405	0.887191	0.293704	0.831675	0.428743	0.260347	0.344919	0.847589
FUNDC1	1089	13.8618	10.0926	11.9813	14.232	10.6616	10.6135	11.5044	14.2697	13.0108	15.5732	15.383	12.4944	10.4673	12.0503	12.8698	11.7073	10.03	9.06992	8.70363	7.97931	8.76162	8.40339	7.87829	8.98623	9.85016	9.71753	8.94352	9.8016	9.77943	9.00186	12.8755	8.37251	12.357	6.24648	9.78536	6.5558	13.8669
MAOB	1090	0.304892	0.437826	3.69692	1.68729	0.795657	2.26216	3.54458	0.999854	1.15664	0.355255	4.21031	1.80845	3.11883	2.9795	0.96877	0.313228	0.541168	0.743972	4.07299	1.77033	1.94827	1.7861	0.636712	1.98567	0.384485	1.12559	0.143847	3.61924	0.743895	0.489657	2.24627	2.84721	7.74192	0.416522	0.448211	1.22067	2.14342
RORA	1091	0.379874	0.49534	0.264977	0.435853	0.495847	12.6387	0.344682	4.44846	0.79199	0.324975	0.601078	0.491777	0.449661	1.50535	0.398397	0.419946	0.521457	0.711219	0.614664	8.56298	20.202	0.662675	0.785824	0.856067	0.699309	2.30908	0.722953	0.532946	0.800511	0.620138	0.707744	0.803362	0.420332	0.21118	0.159929	0.138534	13.0465
DRD4	1092	0.09751	0.18201	0.30417	0.31008	0.191713	2.00587	0.318378	2.19211	2.08864	0.475084	2.90878	0.431168	0.13218	2.79262	0.144319	0.326418	0.283818	1.0421	0.096612	0.919086	0.3911	0.215188	0.226808	0.418918	0.200789	0.279647	0.467849	0.085633	0.770694	0.39074	0.209702	0.794801	0.257005	0.721757	1.07458	0.933199	0.671322
TGFBR3	1093	0.419767	0.357588	0.258196	0.162313	1.98581	0.277353	0.044797	0.075076	0.224071	0.338549	2.41855	0.031901	0.307062	1.14313	0.392966	0.502682	0.216154	0.437708	0.148218	0.059767	1.17158	0.057963	0.190482	0.262565	0.956639	1.24578	1.10278	0.072766	0.68984	1.68556	0.49876	0.058283	0.073022	1.1645	0.361641	0.383078	0.082071
KIAA1107	1094	2.64921	2.8245	5.93696	3.58026	3.84843	6.92234	2.87653	4.44725	2.75989	2.2484	2.39693	3.35038	5.80575	2.76339	3.14944	2.27575	3.86809	4.66163	7.49728	8.87578	12.845	5.80179	3.28017	6.66791	6.18092	5.19766	4.53784	3.08708	3.97958	4.98685	4.86743	3.78229	2.83172	3.17389	2.63779	3.93534	14.0794
PLA2G10	1095	0	0.055481	0	0.018647	0.017865	0.045109	0.001597	0	0	0	0	0.073252	0	0	0	0	0.071963	0.036902	0.026485	0.038996	0.02385	0.039595	0.081926	0.145337	0.037025	0	0.052372	0.023475	0.027832	0.08832	0.024829	0.093697	0	0.087085	0.078326	0.049732	0
HES2	1096	0	0.013535	0.008142	0	0.020961	0.05479	0.006556	0.007552	0.008374	0.01813	0.025981	0	0.012493	0.0915	0.008652	0.006854	0	0	0	0.016014	0.047646	0	0.006985	0	0	0.028228	0.007459	0	0.00707	0.007352	0.032957	0	0.022036	0.013793	0.01419	0.026494	0.00827
ATP1B3	1097	33.609	29.2108	31.8346	45.7887	35.8468	23.9602	35.2461	32.9796	34.7582	38.0589	41.1951	31.2894	36.7501	37.0653	34.0461	31.8807	21.0942	23.6966	33.2017	35.7824	29.5212	23.0807	19.8811	32.4898	25.9988	24.7263	23.136	26.8422	21.8488	26.9018	40.0181	26.3052	41.2111	27.9264	28.3992	33.1358	45.1925
NEDD4	1098	1.6124	1.46955	0.809904	1.61244	1.06369	0.306428	1.60619	0.681655	0.978045	1.40213	1.49926	1.38764	1.05251	1.20546	1.49721	1.43933	1.1971	1.17627	1.29819	0.244348	0.203395	1.3342	1.4995	1.39672	1.21837	0.950943	1.24647	1.47726	0.916345	0.971964	0.618096	0.275311	1.12318	0.349716	0.405846	0.228597	0.311483
PIGB	1099	1.75804	1.53299	1.66131	2.16535	1.93131	2.33696	1.77731	1.20193	1.73335	2.25614	2.68643	1.98406	1.93	2.53137	1.8674	2.16661	1.60153	1.59491	1.8592	1.73609	2.34492	2.44777	2.00771	2.04263	1.32593	1.74749	1.82728	1.98759	1.7111	2.03138	3.30245	2.50381	2.68191	1.52401	1.6787	1.05702	6.03816
MAPK6	1100	30.6955	27.8368	39.1071	33.5086	29.9239	28.4786	28.9422	37.8406	30.6452	36.8369	28.266	32.7357	41.4092	27.4257	36.1348	28.5038	19.3179	20.7453	30.7807	32.4635	27.283	21.184	17.6181	24.2162	26.5612	24.6344	20.4212	20.6192	19.671	27.6781	31.6871	25.7253	24.4277	24.608	20.3809	35.6829	41.8388
GNB5	1101	8.06118	6.59817	6.38644	4.86251	6.07637	6.00944	5.37012	4.25821	6.54817	7.35761	5.01576	4.75466	6.90621	5.57963	6.25523	6.87699	6.38695	6.63507	6.10048	7.03467	6.44266	5.21829	5.67875	4.64316	6.33907	6.69755	6.67531	5.83364	6.57781	6.25922	5.37703	6.80326	6.5557	7.56083	6.83759	6.66237	5.84354
RAB27A	1102	1.02299	1.16784	0.576717	0.988288	1.16436	0.53572	0.972777	0.64074	1.06775	0.908273	2.68217	1.09287	0.633799	1.55442	1.45109	1.0703	0.65849	0.807356	0.542783	0.339261	0.436967	0.860137	0.944628	0.772109	1.20617	0.855781	1.40569	0.732664	0.76554	0.914533	0.591528	0.30639	0.537663	0.299418	0.346037	0.332029	0.426799
CECR5	1103	13.7925	9.99648	13.2543	10.8619	10.6623	10.6679	10.941	7.73497	14.2554	14.2147	12.6253	9.97634	11.2203	12.0785	10.8742	11.1389	11.8638	12.2426	10.6349	6.58696	9.29246	11.1433	12.1036	8.88286	8.37206	12.4121	9.27996	12.2657	13.7519	9.39921	17.9462	14.5121	14.3107	13.0932	17.279	12.1773	9.15839
UFD1L	1104	5.71486	4.37116	4.5081	4.52201	4.05737	2.92336	4.37515	4.93254	5.7488	6.40646	5.9928	4.4529	3.4694	5.25837	5.51831	4.38482	4.27044	4.35417	3.46816	2.85414	2.34992	3.78022	3.58852	3.48345	3.34421	3.58794	3.49936	3.80799	4.05572	3.23574	4.12563	3.24117	4.72999	3.51314	3.12562	3.56394	3.3548
LRP6	1105	8.83155	12.0976	5.6795	9.84452	7.668	5.56823	10.5162	4.59434	8.2875	6.48386	6.75215	9.54766	7.25539	7.81133	8.36527	9.96307	13.8574	13.349	12.5385	5.73823	5.91977	11.6379	17.4047	14.4196	14.3084	11.1643	14.8002	13.4982	11.6038	12.9154	5.8423	5.34445	8.51965	7.3232	6.20057	8.17121	6.37862
GUCY2C	1106	0.012223	0.031509	0.033224	0.021979	0.022175	0	0.018865	0.01712	0.067321	0.013753	0.051347	0.032501	0.02098	0.023934	0.011165	0.014224	0.020481	0.048623	0.021068	0.000977	0.020495	0.061393	0.074786	0.039725	0.035316	0.046393	0.028876	0.036257	0.0826	0.013846	0.072803	0.026385	0.066863	0.019922	0.009156	0.008547	0
SCT	1107	0	0	0.057939	0.239317	0.385326	0	0	0	0.120836	0.105717	0.797722	0.097563	0.264092	0.342246	0	0.112453	0	0.125805	0	0.037984	0	0.164334	0	0.072679	0	0	0.067821	0	0.526834	0.130786	0.120925	0.171123	0.079856	0.136408	0.398298	0.458229	0
PHRF1	1108	5.94686	10.3737	6.93407	6.79853	8.49652	11.4415	8.55614	6.95558	5.73178	4.29243	2.88248	9.74834	6.59987	6.21202	6.27769	9.37602	9.82323	8.76202	5.90485	3.9915	6.65359	6.51482	9.11626	5.5458	6.38308	6.26762	9.56929	6.76035	9.50871	7.35564	5.41408	8.07043	7.45367	8.13066	9.13242	8.23522	1.96832
IKBKAP	1109	9.45949	11.3987	12.6843	12.2494	11.2484	11.555	10.7306	12.077	7.83798	7.79096	8.28249	13.6892	12.1276	9.79861	9.07874	10.4405	8.75834	9.23569	10.9594	15.7183	12.0477	11.9428	8.83929	13.382	10.5382	7.54174	9.27181	9.82745	7.58471	10.3347	9.6947	15.4181	11.5983	10.4789	10.7292	12.3691	9.88479
NUCB2	1110	4.7726	4.81087	5.79942	5.48806	5.54961	3.71509	5.52952	4.57132	5.84471	6.38509	7.72859	5.17047	6.18754	5.54486	5.76185	4.99423	3.88013	3.45899	4.56036	3.25671	3.07763	3.4395	3.10312	4.13111	4.65341	4.13979	4.16738	3.64483	3.1366	4.43144	6.1246	2.73484	3.61077	3.49328	4.15001	3.63399	8.41007
PFN2	1111	146.414	118.062	205.294	307.7	136.631	109.545	259.309	212.287	135.304	173.895	170.907	222.155	183.217	172.524	162.461	125.163	82.0752	90.9605	225.787	150.714	111.86	206.423	86.7296	196.085	94.0137	107.552	77.0258	307.485	85.5533	96.6567	177.196	134.726	334.371	121.197	108.237	128.472	311.548
PTPN3	1112	0.230919	0.168605	0.567323	0.285356	0.249295	0.32996	0.142023	0.110186	0.19044	0.102441	0.252718	0.254838	0.303991	0.353768	0.110737	0.215467	0.089636	0.110773	0.166677	1.13938	0.412546	0.214664	0.13212	0.151196	0.345052	0.582491	0.185344	0.081903	0.244146	0.182086	0.42931	0.215049	0.170602	0.307618	0.049546	0.067993	1.56344
SPTB	1113	0.834792	1.86654	1.67181	0.707304	1.2826	2.25073	0.563435	0.595279	0.715891	0.535023	0.860238	1.1724	1.76756	0.772817	0.833998	1.41733	1.23199	1.53939	1.60143	1.8894	3.09484	0.991101	0.680964	1.69622	1.80371	1.40823	2.39152	0.519581	2.10826	1.74185	0.781496	5.17671	1.5439	2.77126	3.04205	3.06667	1.33098
DAPP1	1114	0.055483	0.039742	0.048339	0.051406	0.066258	0.046469	0.038925	0.026901	0.019887	0.03229	0.123397	0.017494	0.015037	0.108418	0.020547	0.016167	0.026991	0.017993	0.031413	0.009507	0.050967	0.030219	0.008294	0.065924	0.010832	0.041556	0.008857	0.018436	0.041972	0.069716	0.039132	0.009261	0.017326	0.041315	0.091874	0.054946	0.068203
FGF10	1115	0.035948	0	0.077423	0.201667	0.062541	0.513586	0.034989	0.094892	0.001828	0	0.438432	0.116691	0.230398	0.08844	0.015531	0	0	0	0.015616	0.143727	0.355397	0	0.012538	0.630739	0.032751	0.063337	0.187448	0.014031	0.126905	0	0.148399	0.850033	0.039556	0.104097	0.050944	1.57969	1.17069
SLC44A1	1116	5.55306	5.15981	4.8709	8.7791	4.29863	1.92818	6.72636	2.27823	6.13007	5.8337	7.24695	4.54648	3.8966	6.14324	5.00724	5.05981	5.91226	5.93749	7.69655	2.44739	2.56548	5.47287	6.24988	9.13565	6.37609	6.37134	5.6394	8.374	5.69264	7.34477	8.65351	2.61943	8.55903	9.39872	12.6834	8.37376	3.79177
C14orf101	1117	1.24985	1.57781	0.925538	1.41037	1.22682	1.11167	0.994835	1.33847	0.97302	0.971331	1.35631	1.72144	1.02249	1.72453	1.04993	1.11568	1.4489	1.46031	1.0217	1.38441	1.15688	1.69211	1.48539	1.62695	1.09961	1.07008	1.50292	1.10872	1.15591	1.32796	1.16976	1.67756	1.4986	1.44823	1.02545	1.05053	1.64235
SMG6	1118	7.19427	12.3472	8.6628	10.3462	11.401	12.7275	11.2649	8.92174	6.35213	4.95934	5.32761	11.9693	9.03628	9.62733	7.70877	11.2698	16.074	13.9578	13.3348	11.1824	13.3736	12.347	16.6301	13.3753	15.7119	13.19	16.6951	15.6497	14.236	15.2746	7.26182	9.81926	9.47924	10.961	11.0115	10.6866	3.16853
EXOC5	1119	16.8272	15.3164	11.567	18.4185	14.2664	8.84641	17.9576	18.5482	15.751	17.6627	13.4707	15.5341	15.2826	17.3284	18.7471	14.8521	9.63554	10.8475	14.9893	13.8382	9.58288	14.7865	12.0627	16.268	13.163	12.9969	11.9278	17.6248	9.49486	11.9217	17.4463	8.56922	14.7525	11.4322	10.6882	12.0079	22.0728
CLTCL1	1120	0.634766	0.911145	0.898439	0.867858	0.723334	0.818472	0.82648	0.87329	0.695115	0.558662	0.589329	0.864926	0.751266	0.762107	0.606324	0.758212	1.52646	1.45231	1.01669	1.77065	1.39627	1.40151	1.42214	1.4415	1.03447	1.07293	1.07618	1.21091	1.46687	1.44318	0.846797	1.26256	0.751833	1.46368	2.36443	3.29742	0.861002
FGF22	1121	0.152609	0.270218	0.062328	0.038537	0.053486	0.413746	0.020347	0	0	0.124717	0.066295	0	0.034061	0.053879	0.196906	0.135428	0.058004	0.080731	0.219849	0.061292	0.223437	0	0.035404	0	0.209501	0.06424	0.124227	0.059834	0.119207	0.056277	0.313859	0.008068	0.126894	0.132577	0.417623	0.504969	0.240381
FSTL3	1122	1.12447	0.9999	0.730626	0.987589	1.39592	2.46155	0.841807	1.94144	1.62097	1.35783	2.88422	1.2281	0.708087	1.82826	1.03343	1.14226	1.42508	1.56331	0.686991	1.23239	1.144	0.790597	1.24785	1.12945	0.411826	1.32577	1.32693	0.874068	1.66768	1.05719	1.46206	1.3265	0.789161	1.43454	1.20735	2.00119	1.156
DGCR2	1123	23.3343	23.5193	26.647	27.1063	24.446	34.2926	25.5015	26.8319	22.947	21.0992	22.5215	26.183	27.3168	24.8455	21.8076	24.8688	23.2631	25.0865	30.3393	28.7502	33.9764	20.8586	25.6857	23.9819	20.0542	26.7594	20.7612	28.607	26.8937	20.1667	27.8618	38.2777	35.7284	31.7305	33.4342	29.3579	19.4788
RNF126	1124	18.734	13.8483	14.2221	14.5361	15.5864	21.866	16.595	18.0578	14.3341	16.662	12.5399	16.3626	16.1363	14.7539	17.0519	16.7242	11.5774	11.2774	11.9412	9.40485	12.6415	8.70121	11.7906	9.82538	9.54714	11.7268	11.1444	14.6116	14.5893	10.1596	11.5157	18.2066	15.4833	15.1417	17.6492	12.3386	8.99054
MNT	1125	3.4404	7.6032	7.03234	5.17382	8.82849	15.2435	6.25757	6.26173	2.9489	1.72423	2.13543	8.77513	7.95853	4.09832	3.96445	6.73362	5.63247	5.86003	5.97206	7.71712	11.4041	5.15097	4.51244	5.18781	6.1891	5.91	6.11116	4.11267	7.33848	5.59905	7.21371	14.7804	7.45263	12.0317	13.2739	12.4226	3.78684
ZXDC	1126	3.08793	4.53288	3.5581	4.02102	3.90865	3.55038	4.00421	3.31583	2.67374	2.32724	1.90291	4.15041	3.71863	3.34139	2.70174	4.07672	7.60924	7.10905	6.02626	5.94114	4.78856	6.28437	8.09347	6.11956	5.71065	5.64254	6.74868	7.33194	7.44475	6.56999	3.67972	4.3727	4.63819	5.09394	5.13563	5.63567	1.63697
JMJD6	1127	6.13556	8.01615	9.14221	7.63847	8.29965	10.3301	7.40911	7.87043	5.25684	5.3088	5.13518	9.35098	8.36106	5.07723	6.66214	7.48899	9.1014	7.91664	9.90959	14.9521	14.0721	8.98819	8.06554	9.95864	9.91339	7.05222	9.88718	10.5144	8.04269	10.7891	7.19302	12.2812	9.3614	12.4559	9.89251	10.829	7.16117
POLB	1128	11.687	10.7014	13.525	10.3153	11.5921	10.0201	10.3734	11.801	10.2031	14.7882	10.4859	10.2921	12.0681	9.41371	12.7146	9.47698	7.50634	7.73057	9.77593	12.1243	10.1442	8.32664	6.55464	7.44915	7.93225	8.01287	7.21235	8.05224	7.16702	8.66787	12.8497	12.4586	11.4805	11.4387	11.2604	13.195	20.2717
ST6GALNAC1	1129	0.042486	0.042877	0.293423	0.170172	0.132208	0.199716	0.041541	0.191827	0.035533	0.057695	0.146739	0.077934	0.174457	0.179187	0.109391	0.087054	0.064085	0.032149	0.093039	0.168722	0.197157	0.081964	0.073892	0.135664	0.038708	0.147894	0.141993	0.090981	0.05959	0.124355	0.19222	0.29672	0.233332	0.365103	0.36045	0.256164	0.349462
WIPI1	1130	2.37422	3.35537	3.1392	1.89587	6.72147	3.80959	2.29995	3.54668	1.72317	2.21595	4.80665	1.69454	2.42314	4.09362	3.50613	3.52823	2.85502	2.91726	1.93485	3.54107	4.42268	1.6261	2.04519	1.65594	3.47555	2.92205	4.3816	1.73563	2.99522	3.96675	1.77453	1.02444	1.63161	2.91192	2.04616	2.29346	1.3683
FRMPD1	1131	0.026423	0.211286	0.816669	0.745301	0.23512	0.877764	0.702837	0.145122	0.140582	0.166529	0.145573	0.565142	0.217885	0.084496	0.117662	0.162341	0.151609	0.134016	0.568062	0.256413	0.800799	0.564048	0.055977	0.31336	0.050851	0.056478	0.059858	0.591744	0.194815	0.162164	0.11933	1.69194	0.526616	0.232124	0.233217	0.582819	0.327691
GBA2	1132	10.2145	14.0089	16.8362	14.7453	13.5132	15.9455	12.5518	14.8208	9.0617	10.5932	10.6688	16.3181	15.0569	9.93403	11.7742	12.4041	16.8648	15.7602	18.6017	26.7268	21.2086	18.042	16.1854	17.8317	14.9193	13.5895	15.5771	16.6321	17.5394	16.8491	14.6631	17.8416	15.1642	17.9623	15.912	16.2358	14.1383
NDST1	1133	10.2747	16.2625	12.9755	14.3962	14.4328	13.2753	12.6538	9.26836	9.1782	8.42898	9.08775	16.2096	13.6332	11.8403	10.232	14.8458	15.003	15.0035	15.5395	16.1508	17.0197	12.9427	15.6411	14.7809	13.76	14.9897	15.4125	14.4465	15.8879	14.6636	12.1553	21.9388	13.9751	19.6455	19.9553	23.4088	8.12883
ASNS	1134	13.4294	15.9063	18.6797	18.2488	14.4948	14.5618	12.221	26.2928	13.7361	18.3332	11.1669	16.5876	14.3502	10.6105	16.6045	15.0452	12.4154	13.5733	8.6401	18.6	12.1378	12.9605	11.6036	12.3061	11.0213	10.2111	10.1918	9.75689	13.991	12.0866	14.7827	12.5077	7.37272	9.71872	10.98	13.5733	14.1
AP3M2	1135	7.34038	6.93159	11.1024	7.57816	8.4978	8.54523	7.51867	5.53342	6.47284	6.38917	7.36205	8.3104	10.2524	8.03122	5.71659	6.70638	7.53454	7.54935	11.1151	10.5958	13.1059	7.15953	7.27357	8.42391	9.93056	9.57692	8.77365	8.45289	7.61022	8.73623	9.97323	12.7085	11.033	10.4177	10.2118	10.6229	10.4639
CNGB1	1136	0.022736	0.007683	0.073452	0.014003	0	0.460405	0	0.008574	0.037773	0	0.112008	0.050069	0.243256	0.100857	0.019646	0	0	0.008486	0.258549	0.24544	0.292639	0.05037	0	0.078608	0	0.039409	0	0.008874	0.015944	0	0.009386	0.026325	0.018256	0	0.007946	0.01128	0.177495
ST6GALNAC2	1137	0.21108	0.09997	0.172955	0.143057	0.124972	0.165451	0.097308	0.077334	0.175857	0.135793	1.59545	0.087927	0.184452	0.549093	0.088602	0.087976	0.122684	0.44562	0.309662	0.207201	0.32143	0.299656	0.266533	0.290084	0.141392	0.4812	0.172119	0.175769	0.393292	0.311313	0.328913	0.119532	0.072932	0.362332	0.281792	0.264205	0.034045
CHAT	1138	0.067643	0.078295	0.164691	0.00904	0.030245	0.302162	0.047731	0.310259	0.024221	0.026219	0.033399	0.127556	0.217285	0.035591	0.012598	0.106005	0.030713	0.065746	0.083981	0.542424	0.741237	0.073445	0.01017	0.230565	0.022437	0.20439	0.083068	0.045216	0.15385	0.063937	0.350381	0.192899	0.047694	0.234256	0.080412	0.425247	0.204041
PABPC1	1139	105.057	108.179	87.7705	107.841	110.328	76.1318	107.853	108.004	118.55	92.3181	95.7602	88.1535	81.4124	134.547	102.896	99.9504	88.5884	87.3388	78.4246	57.9086	56.9347	70.9871	74.1421	80.4423	113.546	97.6799	109.199	95.8467	94.6117	105.839	74.6103	56.351	81.0783	93.6812	122.258	117.924	44.8471
TESK2	1140	0.584053	0.204869	0.106961	0.39174	0.301396	0.341917	0.15887	0.222261	0.241704	0.165075	0.686258	0.247056	0.246614	0.330134	0.193442	0.240836	0.16957	0.337525	0.203473	0.069448	0.227694	0.186276	0.349527	0.299532	0.512016	0.350463	0.297726	0.183311	0.286209	0.265588	0.239832	0.212631	0.338037	0.276035	0.335335	0.220315	0.153028
C16orf80	1141	58.0823	46.7376	65.4579	79.0633	48.784	50.4439	77.0379	53.5292	53.3339	61.8072	55.3072	58.2387	55.9607	45.8287	56.4775	47.3109	49.2061	51.3207	57.595	36.3625	42.4604	49.4206	47.0394	53.3432	40.8037	43.4585	42.9679	77.4358	43.6802	41.3833	43.3596	50.9396	61.0422	39.7037	38.0266	37.5408	37.096
CSNK2A2	1142	19.7411	23.774	23.3136	25.5363	22.4891	16.2617	27.6981	13.206	16.6228	15.724	15.617	21.1317	20.2193	18.365	18.1152	22.2391	30.3734	28.2025	26.834	15.2783	17.4106	25.0431	27.0394	25.876	33.6748	27.4503	32.4829	33.1553	29.083	31.6337	17.9405	16.8805	19.8369	20.8326	23.2966	24.1647	6.1899
PTPN21	1143	4.1582	5.93153	3.8545	6.36875	4.79455	6.12989	6.17232	4.32634	3.80693	3.00392	2.61935	5.44226	4.62351	6.58633	4.37097	5.39363	3.71217	3.53924	3.91788	2.31387	3.43272	4.06082	4.15658	4.95484	3.39705	4.34026	3.73508	4.07834	4.01144	3.22178	5.25589	2.19867	5.46125	3.54074	2.33663	4.54133	2.06226
EIF2B3	1144	11.8651	10.7929	9.6621	7.61096	9.65905	6.95214	7.17946	9.15756	10.3462	12.8653	10.962	7.77305	8.50081	7.8769	11.4848	11.5275	9.59904	8.87024	8.13477	9.79422	8.29998	7.44938	8.82851	6.7839	7.92333	9.00566	8.59002	7.82898	9.15091	9.66499	11.3367	9.17145	8.55325	10.2042	9.25598	10.7345	11.1555
CAMK2A	1145	1.00767	1.80478	8.57852	2.27493	3.4278	3.43002	1.54515	2.20782	1.54752	1.21194	1.55893	4.38532	7.51686	0.92882	1.54842	1.38836	1.82428	2.23677	5.38697	7.53857	3.96261	4.71789	1.61298	5.38147	1.50481	2.45851	1.41675	1.34381	3.25785	1.47464	2.80343	15.1733	2.51609	1.37363	2.07606	3.62588	5.83521
TCOF1	1146	3.30768	6.1462	3.5701	4.21732	4.5215	5.3219	4.74352	4.02598	2.69432	1.52794	1.26537	5.82095	3.59267	3.82699	2.42827	5.48218	6.65386	5.95417	3.77502	4.23704	4.60551	4.55153	6.16908	4.31382	4.29786	4.39727	7.20956	4.46073	6.34647	5.49348	2.93159	5.5624	3.78396	5.15699	5.42876	4.50955	1.3197
CDC42	1147	50.1178	45.0923	78.3116	56.0985	64.7135	71.8769	53.2298	75.148	60.9895	70.5576	82.9965	52.9732	73.4395	57.3819	59.985	42.3127	38.3249	36.6322	54.4043	77.8384	70.8778	40.9694	31.019	47.8779	51.0726	47.576	38.3373	40.4538	35.2704	48.8482	79.279	76.5391	63.7715	63.2874	56.4026	59.3593	138.478
OSBPL3	1148	0.363168	0.510284	0.456305	0.688091	0.490377	2.08243	0.677862	0.675489	0.444437	0.367184	0.384162	0.479629	0.516165	0.909145	0.424218	0.465573	0.617946	0.662241	0.473097	0.584943	2.57033	0.626935	0.901962	0.748349	0.756784	0.44338	0.436145	0.752333	0.625363	1.02188	0.652774	0.282572	0.374163	1.42882	3.85028	2.70884	0.634353
EPHA8	1149	0.020073	0.033886	1.20614	0.311653	0.686412	3.29568	0.249969	0.436405	0.117706	0.026272	0.147652	1.49445	0.835132	0.077573	0.086765	0.034508	0.030518	0.015258	0.300937	2.87239	6.00069	0.994788	0	1.08446	0.631694	0.531667	0.074698	0.117947	0.021355	0.044314	0.739052	7.59626	0.228377	1.74211	0.759201	0.060022	1.85131
SLC12A3	1150	0	0	0	0	0	0.007577	0	0	0	0	0	0	0	0.006813	0	0	0	0	0	0	0	0	0	0	0.008831	0	0	0	0	0	0	0	0	0	0	0	0.008005
RAD18	1151	5.21717	4.03734	3.03647	3.99732	3.08699	1.98008	4.26726	1.93334	4.80111	4.19183	2.82923	3.55072	3.18122	3.84157	3.59434	3.73057	3.79472	4.35489	4.40536	1.36147	2.32723	4.14477	5.09324	4.50248	3.67577	4.45834	5.35141	5.01722	4.47947	3.87491	2.03196	2.34579	3.57485	1.31813	1.31952	1.65911	1.3331
ATP2B1	1152	7.16398	9.49464	7.40522	7.61592	9.35825	7.43352	6.17986	16.3971	10.2918	7.12519	12.2934	8.29465	10.9595	12.438	8.60851	8.23671	10.0541	10.5608	8.24815	18.0289	10.6833	7.58615	11.1135	9.98588	9.25895	10.1031	8.77105	6.46645	10.2016	9.13421	10.5027	13.6493	8.03008	18.5611	7.50804	16.6867	23.3286
TRPM5	1153	0	0.009165	0.011027	0	0	0.010601	0.0024	0	0	0	0	0	0.00846	0.009533	0	0	0.029262	0	0	0	0	0.01149	0.00946	0.010241	0.024377	0.009558	0.012559	0	0	0.009822	0	0.021126	0.009679	0.007854	0.009609	0	0
NCK2	1154	27.9829	29.4516	31.1827	29.1799	30.4211	38.0793	32.2845	33.6502	29.1958	30.0018	33.6793	31.7282	25.7976	28.3545	32.334	28.9004	26.9877	26.7961	29.8094	33.3263	36.34	20.5239	23.0048	22.9107	28.5429	30.4911	33.1926	28.203	29.0393	33.8384	23.1812	30.2957	26.9118	51.5589	53.7864	41.4939	20.2598
MAP4K4	1155	31.8769	63.2069	46.1767	42.3737	50.4056	41.5936	52.2911	35.2069	30.9813	25.9381	23.2359	54.3142	43.4316	28.6695	43.8189	53.4332	52.8557	46.4538	52.7308	50.116	41.6608	47.6811	46.7792	45.8169	63.932	43.009	59.88	49.3716	45.9481	65.5656	30.7062	37.5036	34.1523	47.7494	45.1311	65.2457	15.9966
MGAT4A	1156	0.720999	1.22357	3.42346	2.54423	2.67266	4.37106	1.9739	3.4064	1.40042	1.06242	2.03568	3.0608	3.50536	1.96381	1.66869	0.965412	0.890461	1.67947	2.5618	4.34665	5.88462	2.78762	0.663354	3.66786	2.53917	2.04302	0.861378	1.59656	1.25929	1.58856	2.24334	4.67944	1.90316	1.84047	0.963908	2.16685	5.86152
RPL31	1157	73.8711	35.9786	74.7431	52.7871	47.51	25.809	48.4434	44.3363	79.4708	100.89	94.6585	33.7965	48.4693	69.7883	56.6614	45.4402	40.3	38.5779	48.8382	25.8445	28.8401	52.495	39.8134	32.2999	39.1585	59.6108	34.6712	51.0408	43.0311	40.8771	126.889	45.2159	90.6382	46.8905	63.5126	40.0168	99.1153
WDR1	1158	16.9358	16.7772	19.1736	19.9668	18.9863	15.8524	20.3377	20.4434	15.8186	18.433	21.2171	18.9648	16.4253	20.9719	17.8651	17.6019	16.9286	16.4489	18.1091	18.8458	15.8115	16.9512	18.2567	14.4403	12.9599	16.6236	14.6044	22.3881	16.1791	14.7995	16.7513	22.9515	19.9856	15.1971	11.5038	13.6695	15.5571
SNX13	1159	3.37389	3.20166	1.78914	2.2786	2.5765	1.32455	2.3164	1.69752	3.16161	3.12634	3.28828	2.35922	2.54059	2.73278	2.93608	3.00983	2.85153	3.27457	2.44981	1.73481	1.49349	2.98877	3.3868	2.90234	3.10443	3.24519	3.24505	2.56145	2.80222	3.24364	2.81886	1.44593	1.98689	2.09841	2.21077	2.4464	2.54927
MS4A12	1160	0	0	0	0	0	0	0	0	0	0	0	0	0	0	0	0	0	0	0	0	0	0	0	0	0	0	0	0	0	0	0	0	0	0	0	0	0
ARHGAP10	1161	0.163325	0.175628	0.231466	0.111774	0.445933	0.1322	0.136932	0.090003	0.121105	0.212013	0.911775	0.073506	0.180309	0.453792	0.150302	0.157103	0.059468	0.060441	0.184656	0.115956	0.182333	0.072046	0.076611	0.119987	0.131744	0.217751	0.155884	0.123482	0.127081	0.186656	0.235413	0.239178	0.39227	0.165056	0.099094	0.099066	0.090984
RPS6KA2	1162	5.12906	9.46067	13.3899	11.4776	13.0912	10.6831	9.90994	11.0065	5.42221	6.14439	6.73865	13.3519	11.8058	7.30701	9.32089	8.1435	5.67544	6.19216	9.24142	13.676	11.1513	6.74572	4.37885	9.0824	8.14426	6.19309	5.29613	6.67297	5.94151	6.44516	4.56265	15.491	9.52316	10.4363	7.90383	11.6706	5.7249
ING3	1163	4.03385	4.27247	3.29065	5.2666	3.38568	2.62277	5.14411	3.2138	3.75807	4.77235	4.1227	4.47374	3.30329	3.97368	3.97361	3.84097	2.64563	2.23851	2.99484	0.981588	1.72186	3.19838	2.41733	3.90824	2.44115	1.90732	2.56881	3.20076	1.99638	2.65134	3.17967	2.09641	4.58109	2.09019	1.93325	1.97881	2.40428
VASH1	1164	32.1052	40.5741	31.3003	26.2315	37.9158	32.3236	28.7664	35.1951	28.2591	28.5379	21.6606	31.0086	31.5502	34.3011	29.2628	38.3803	26.5307	26.4438	26.7176	30.2197	26.2087	19.4465	23.492	19.3739	34.5087	38.8366	34.889	18.9535	36.6115	31.12	47.8888	32.7418	31.2746	39.8294	59.415	38.387	18.0506
LMCD1	1165	1.49748	1.04537	1.35814	1.29414	1.89305	2.64683	1.25773	0.189231	1.04895	1.45592	5.45504	1.10589	1.2215	4.051	1.46475	1.62873	0.680395	0.805712	0.992118	0.399905	3.03344	0.635319	1.03411	0.567185	1.65715	3.35493	1.36843	1.20742	1.31363	1.19449	3.68902	0.617172	1.53082	0.65226	0.725591	0.537051	0.741853
WBSCR22	1166	5.92945	5.41503	5.19812	4.6834	4.89637	6.1047	4.7864	4.89342	6.29616	6.07339	6.54624	5.09788	4.75435	6.36979	5.96301	5.26922	3.83157	3.81554	2.67457	3.19698	3.01335	3.51351	3.25494	3.16948	2.60949	3.28687	3.15935	2.09679	4.3529	3.23193	5.22521	6.4617	5.28911	4.84567	5.02317	4.85893	3.52535
SEL1L	1167	8.8185	9.18939	8.84459	8.23086	11.8605	7.89399	8.57353	6.93137	8.35	7.37676	7.96015	8.19213	11.5354	8.27377	9.75379	9.44797	6.46647	7.12847	8.84445	7.55334	9.384	6.34744	7.24554	7.35799	12.4451	9.83419	8.9553	6.59575	7.1405	10.2377	9.92877	9.04016	8.74991	12.0092	11.4522	14.7295	12.7472
TRIP13	1168	13.4921	10.4621	5.27689	9.69222	6.84133	3.05549	9.52457	4.94348	13.0876	12.6495	8.52402	8.79196	5.68739	10.2722	9.16413	10.9081	10.5099	9.68174	7.6613	2.13598	2.95324	7.79139	11.2434	7.14118	5.47567	8.48935	8.75894	12.2131	9.56699	7.19673	5.1083	2.06624	6.86036	1.7156	2.2025	3.38615	1.16088
ATP6AP1	1169	16.892	19.8312	26.4673	20.0108	27.8924	39.6392	18.2221	29.6161	13.7867	14.67	17.0162	23.119	30.0532	19.0362	19.2344	21.1788	22.6344	22.8797	24.2615	41.2974	38.5257	19.9562	20.0651	24.1047	23.0775	23.6236	20.4282	21.3909	23.5045	22.7552	23.4438	35.6015	21.9205	31.3026	31.9513	29.12	19.0472
TCF3	1170	58.9557	72.6512	29.5664	54.9854	44.0951	34.7584	65.5357	32.1479	55.8448	44.5201	34.5366	50.1159	32.1461	63.8105	47.2925	67.1695	62.405	63.859	43.4989	16.0064	24.0863	38.7449	71.5283	38.4283	39.9699	59.9227	66.41	60.3154	70.565	44.0832	29.2711	17.253	43.0711	13.5474	24.0733	17.1749	4.83045
TRIB2	1171	31.0456	31.4787	74.9652	49.2376	41.7658	135.778	40.7985	35.0148	33.4515	31.9766	42.7497	50.7105	73.256	31.6039	35.2252	30.4739	38.2246	40.1884	62.6826	58.1268	176.007	30.8955	46.572	51.4923	37.6168	35.2235	33.9535	38.5017	29.7573	36.5036	17.3044	62.3386	47.645	17.5045	6.67509	9.3121	62.3474
DAZAP1	1172	45.6014	43.8435	38.1054	39.4057	39.2987	36.6306	42.8116	47.4396	45.6317	41.8005	30.2269	44.1174	29.4839	37.015	42.9806	47.284	31.8828	32.5426	26.2594	23.8861	20.0436	24.2738	29.6423	22.8129	25.6072	27.2485	34.1254	30.9276	32.0312	29.0526	20.2766	27.6725	27.868	24.4173	28.8175	21.4557	14.7474
MBD3	1173	51.3512	48.1176	38.4067	44.6626	39.8037	47.5471	50.19	37.8934	46.2561	48.9218	38.4771	45.677	37.589	48.9746	43.2491	51.885	38.2272	35.3723	34.013	24.4185	34.2139	28.0319	39.0248	25.166	22.968	35.0525	36.5099	45.8298	41.0831	23.3607	48.0496	44.8221	57.8743	41.7111	45.137	27.5698	24.4849
PRLH	1174	0	0	0	0	0	0.146339	0	0	0	0	0	0	0	0	0	0	0	0	0	0	0	0	0	0	0	0	0	0	0	0	0	0	0	0	0	0	0
HLTF	1175	9.75055	11.2443	9.28044	14.6995	10.283	10.5728	12.0001	16.5074	9.82127	9.2211	10.5064	14.9997	11.0623	10.1437	11.2629	9.84767	9.03868	8.54022	7.58695	7.84123	7.7825	12.4753	9.34292	13.3752	8.55629	6.08338	9.75778	8.15109	7.13988	8.22733	11.0824	10.3952	10.4795	10.7053	9.6154	10.6784	20.3259
FAM50A	1176	23.4197	24.8069	21.783	18.4822	22.1036	24.9298	22.9195	24.982	24.7605	26.9885	26.3177	22.3907	16.8639	22.0474	28.489	23.5036	18.2218	16.4601	13.4007	15.1636	12.5849	16.4421	16.2467	12.3143	11.5664	14.3745	13.3913	14.9845	16.335	14.8831	17.4313	16.8772	15.9655	17.112	17.1798	14.0874	12.6638
FAM3A	1177	3.53317	3.13981	3.35639	3.64557	3.64769	5.34473	3.45569	4.65635	3.88321	4.42277	5.39598	3.56875	3.27401	4.54519	4.04064	3.19373	4.06119	3.68088	3.40806	3.70556	4.10871	3.42818	3.78111	2.99911	2.3252	3.84527	2.90392	4.22845	3.9692	2.5298	4.66625	3.92861	4.14165	3.26547	3.62672	2.84377	3.33381
CPSF1	1178	19.5391	23.0648	15.6303	22.3399	15.7681	19.3111	23.3114	15.6555	17.3778	13.977	9.70545	23.6076	14.0446	18.8508	14.7962	20.4197	29.387	30.7453	22.2607	16.8053	18.9156	26.8226	34.4488	22.5263	18.4471	24.2979	26.9462	32.3013	31.5056	20.3137	8.93247	13.252	16.4452	10.3003	11.0093	10.1136	3.30686
MYO3B	1179	0.008707	0	0.07449	0.065067	0.03658	0.158773	0.025657	0	0.016497	0	0.034121	0.067723	0.070628	0.064642	0	0	0.019902	0.024675	0.098206	0.005258	0.395167	0.077612	0.02287	0.078447	0.029952	0.013902	0	0.015328	0.009285	0.03053	0.059641	0.066301	0.02164	0.015232	0.033935	0.039026	0.151017
CYBRD1	1180	3.71943	3.21053	2.22344	1.38469	5.01219	1.69669	2.76968	0.543366	4.23558	4.17179	13.0048	2.06315	1.93457	7.0328	3.07849	3.18925	4.29028	4.71688	3.79943	0.65968	2.88896	3.1222	5.3316	1.96506	3.53942	6.90266	4.31984	4.58096	5.36917	4.36342	4.98395	0.251926	5.25844	1.79343	1.11038	0.750678	1.66522
CDH19	1181	0.016026	0.010831	0	0.004901	0.005591	0.012527	0.005247	0	0.046367	0	2.61595	0	0	0.016821	0.013754	0.005485	0.006064	0.030317	0.007057	0	0.056849	0	0.00559	0	0	0.011294	0.005969	0.012341	0.011315	0	0.013232	0	0.005799	0.009281	0.006292	0.0053	0
PDCD2	1182	9.20234	6.5236	6.79561	6.46866	6.93223	5.52562	6.19818	6.27163	8.23729	9.72575	8.50478	6.41748	7.1662	7.89145	7.76273	6.31321	4.69817	5.07863	5.03856	4.62467	4.58902	4.48425	4.30956	4.86724	5.92347	5.42196	5.01684	4.41049	5.11367	5.24532	9.78948	6.30917	6.59731	6.93573	7.40358	7.06591	10.2019
SLC6A15	1183	9.3575	7.44704	3.65148	2.34104	5.74963	6.25228	3.01132	12.1753	9.92728	8.58379	5.97755	2.80519	6.20364	10.4262	6.81756	7.29725	5.37275	7.33387	3.43105	8.59732	5.81474	2.6526	3.86578	2.97579	6.46199	8.52645	7.44839	1.48845	10.0862	6.4583	9.47354	4.79955	3.09593	8.7147	10.6483	14.6603	13.7034
RDH11	1184	15.3672	15.3906	16.6117	15.702	16.636	14.947	15.2129	14.1618	14.4549	15.6348	16.0284	14.9158	18.057	16.3084	16.0424	15.0753	17.5017	16.3439	16.1027	12.5574	15.7548	15.6689	18.225	15.1264	16.2499	16.4431	16.2737	15.5113	16.5959	16.675	21.8491	15.5366	17.5832	15.6587	14.8097	16.1339	19.6654
PRKACA	1185	12.5801	19.9691	21.7626	21.1242	20.0301	30.8479	18.0429	29.6787	14.5635	11.2036	14.5848	25.3821	18.3229	19.7585	14.7613	18.7167	19.0347	20.6357	16.5967	37.9801	23.6367	16.5908	17.5134	17.9944	15.4449	18.2993	15.5621	17.1751	20.2422	16.0867	17.711	24.2467	17.622	21.0333	20.0089	19.05	15.5894
LPHN1	1186	11.63	27.7186	29.0528	16.7821	30.1207	66.5534	16.5456	22.1236	13.2208	8.51484	9.48698	30.3741	28.9168	12.9701	13.4093	23.0209	28.6692	30.2815	25.3984	42.022	61.0875	23.0468	23.2912	26.5242	29.2118	20.7795	27.2932	14.0637	32.4287	27.909	15.8584	78.9656	22.5734	49.7087	53.2401	45.4459	20.9926
SPP2	1187	0	0	0	0	0	0	0	0	0	0	0.034304	0	0	0	0	0	0	0	0	0	0	0	0	0	0	0	0	0	0	0	0	0	0	0	0	0	0
ACTN1	1188	4.50803	6.44975	2.7909	4.12371	5.06368	2.6301	4.65209	2.90465	9.19037	6.67071	8.16337	4.71408	3.1559	6.0555	4.98025	5.72439	11.4516	16.0798	3.97873	2.80929	3.79475	5.80308	10.0445	4.30433	4.48412	7.48163	6.38281	6.31385	12.2219	5.90676	5.05228	1.74908	2.50881	1.90745	1.30015	1.2766	1.13064
ZFYVE26	1189	1.37935	1.96412	1.59225	1.47324	1.47802	1.90663	1.67744	0.961999	1.11517	0.868483	0.901997	1.91516	1.7351	1.38314	1.22394	1.69239	2.13527	1.99813	1.95181	1.68334	2.09677	2.12134	2.26267	2.11283	2.02366	1.85491	1.99311	1.81438	2.1322	1.87239	1.62937	2.22061	2.09457	2.38826	2.00503	2.28965	0.768397
RPS6KA6	1190	3.38079	3.65317	3.51304	3.27972	2.87969	2.67684	3.31082	3.35443	3.80816	2.96142	2.24911	3.17279	3.50717	2.68011	3.37926	3.26109	3.78112	3.66342	4.19672	4.9047	3.08217	4.50125	3.7751	4.29129	4.21466	4.05949	3.68163	3.6382	3.67489	3.97696	2.58486	2.7094	2.18293	1.81217	3.08141	3.20178	4.31204
EPN2	1191	10.1184	10.6569	12.8771	10.2417	11.2416	12.941	9.88243	6.74744	8.95708	8.95856	8.9444	10.3108	12.4126	9.15257	9.84958	9.91722	12.1551	13.2324	13.6628	10.5718	14.6522	10.6522	12.5016	11.9405	12.4225	13.6958	12.4471	11.6497	14.2084	12.8264	15.1875	17.8681	14.7187	16.3905	17.5489	15.937	13.372
PTPN18	1192	3.71468	4.22494	2.48997	2.82772	3.48953	5.12568	3.15728	2.93823	3.26019	2.83529	2.7219	2.86175	2.98282	4.11229	2.60232	3.76418	4.97684	5.17744	3.48031	3.91912	5.50965	3.44219	5.11789	3.88091	4.39205	4.49027	5.24297	3.38123	5.32724	4.98133	3.77425	3.02286	3.08782	3.64365	4.05704	3.61925	1.62378
LIMS2	1193	0.417493	0.471719	0.857343	0.536441	0.909776	0.630405	0.316688	0.307675	0.366432	0.494486	0.983901	0.48047	0.563282	1.09739	0.457019	0.486904	0.306223	0.377568	0.401495	0.250108	0.826487	0.412261	0.235682	0.506545	0.273058	0.458305	0.465597	0.2863	0.523161	0.304475	2.71811	1.30937	0.680271	0.744023	0.65955	0.750143	0.593298
ACCN4	1194	0	0.062514	0.250676	0.203506	0.100315	1.77058	0.033749	0.116199	0.094484	0.027997	0.12446	0.498911	0.356949	0.238433	0.062231	0	0.046594	0.054392	0.135689	0.172547	0.772668	0.124278	0.037217	0.722149	0.03744	0.01453	0	0.248692	0.043473	0.037741	0.211855	0.303705	0.135503	0.038322	0.036522	0.04764	0.067878
SPEG	1195	0.408314	0.921245	0.662362	0.359878	0.677462	1.49258	0.365872	0.442183	0.372099	0.288608	0.306799	0.851773	0.555055	0.635546	0.406611	0.711679	1.42035	1.31338	0.550394	0.749279	1.20006	1.33876	1.14967	0.93286	0.944342	0.97285	1.41903	0.402409	1.68708	1.18924	1.01119	2.00817	0.674451	1.89615	2.05648	0.690841	0.598909
LNX1	1196	2.71043	4.31682	4.6997	3.11784	8.3193	6.0688	4.29754	2.38182	3.53552	4.03356	4.51671	4.71509	5.14827	2.4911	8.18422	3.2774	4.75499	4.09563	3.66629	2.24655	6.13161	3.28787	2.75638	2.95796	5.80466	2.33467	3.09952	2.06124	2.15335	5.59866	2.74582	3.88991	4.18771	7.82834	4.67235	7.70627	5.38205
ALDH3A2	1197	24.4381	17.2145	15.4512	17.4617	15.126	12.1793	18.2082	10.8832	22.2769	20.511	17.7426	15.5055	17.0314	23.344	15.7754	18.6746	13.7903	13.9994	18.2297	11.0719	13.4194	12.522	17.1699	14.8691	14.0012	21.0037	18.5648	19.2444	14.9484	15.932	21.1028	8.67458	20.6135	11.3721	8.44769	6.59377	15.1939
TFRC	1198	10.8703	9.227	9.6912	14.3647	8.05435	5.59479	12.6277	8.42558	14.2796	9.71225	11.3191	11.7718	8.61983	12.3252	8.05999	9.03493	10.4363	11.5958	11.5449	7.79967	5.78913	13.3791	12.6548	15.0586	9.47918	12.3396	12.5733	14.9699	13.0012	10.7226	8.43099	7.50174	10.8992	6.22431	5.10524	5.64647	7.06895
SREBF1	1199	6.36045	10.258	3.96887	5.23316	6.86857	3.74224	7.24931	4.40369	4.22732	4.51612	2.95158	8.07927	4.31529	3.50718	6.07539	9.21091	12.236	10.2129	6.17068	3.81846	3.55867	10.1432	15.239	6.32366	5.66706	5.37947	10.4065	11.2281	10.1101	7.87185	5.06297	7.23679	7.97936	4.88858	6.60348	5.97813	2.3049
TRPC5	1200	0.055414	0.100002	0.165615	0.022976	0.232355	0.2097	0.060574	0.118677	0.068574	0	0.047747	0.163568	0.356469	0.039069	0.024013	0.044388	0.174683	0.23075	0.220165	0.251454	0.584643	0.13321	0.019298	0.406116	0.46122	0.216502	0.199743	0.064592	0.130721	0.31222	0.112037	0.151134	0.094861	0.79402	0.091896	0.89836	0.152596
AFF4	1201	14.4469	20.0622	16.4372	18.0883	19.0033	13.1276	18.5371	13.4275	13.1354	10.7808	9.82767	19.7464	21.2456	16.8164	16.2043	18.585	18.9177	21.3072	20.8959	13.2628	15.7466	17.6287	21.6055	20.3861	25.8417	26.5654	24.4565	16.9504	21.0095	23.1018	17.6699	15.1279	16.57	18.9046	20.2813	24.2361	16.3409
UBE2D1	1202	17.2849	15.7569	10.4485	17.4165	17.4034	18.4984	16.2254	18.5747	19.2382	24.0019	19.2676	15.2289	19.8076	21.0851	22.9392	15.3419	6.67022	10.8089	11.1893	12.0793	12.943	13.543	10.6631	11.6872	7.82234	11.3023	8.25302	11.504	9.59822	8.84507	24.3043	19.8851	20.0628	20.0157	16.3106	20.0583	33.4299
MPP5	1203	8.27354	6.67256	5.04542	9.02211	4.25185	2.69088	10.0265	4.02622	9.07555	7.89056	7.37061	7.78689	6.08501	8.68316	6.90392	6.11982	6.12096	7.09244	9.87137	2.6998	2.5186	8.1934	7.80616	9.39711	5.79104	9.35199	5.96986	11.5539	6.12648	5.03071	7.9463	2.32338	9.61913	1.26555	1.46663	2.18556	6.1977
RHOBTB1	1204	4.94153	4.75221	3.87538	3.33869	4.97403	4.18101	3.68602	7.37222	5.95699	5.14953	8.60609	4.05255	4.62119	7.79114	4.00851	4.43343	3.46793	4.18996	3.59347	7.03262	4.0141	2.26748	3.84221	2.73858	2.9015	4.20082	3.62615	2.68205	4.09923	3.21092	4.36791	2.41504	4.69512	3.67319	1.61918	1.47932	9.43819
ASAH2C	1205	0	0	0	0	0	0	0	0.009402	0	0	0	0	0	0	0	0	0	0	0	0	0	0	0	0	0	0	0	0	0	0	0	0	0.009145	0.00722	0	0	0.010296
SMC1A	1206	21.2157	29.7198	21.3942	27.7429	23.2141	17.3744	30.0788	21.8064	22.7736	15.1998	12.0088	28.6324	21.1025	21.8736	21.9019	28.3242	26.1666	24.5137	26.2977	19.3917	16.5125	23.9124	29.1873	24.0283	25.5941	24.5772	28.2277	31.3248	24.0433	26.9207	12.498	14.748	21.0617	12.5977	15.8087	15.4848	5.25815
HSD17B10	1207	59.8686	46.9829	50.2814	55.1736	60.2882	40.7155	55.0343	45.1819	60.3546	71.4317	78.1724	45.9918	48.7772	60.6493	68.6477	52.8025	41.7959	38.1641	50.1031	24.2041	26.3813	43.9419	38.875	32.1103	30.7445	47.3727	32.3397	57.758	43.699	34.369	70.9733	38.6968	78.5501	35.345	42.1044	37.2739	26.7052
MARK2	1208	6.81986	9.4039	8.16288	7.23334	9.72464	10.4632	8.10953	9.93531	6.83417	4.88787	4.82734	9.26412	8.37339	7.6777	6.80296	8.64175	7.98297	9.0484	6.17516	7.28889	5.98096	5.77248	7.55739	6.04365	6.9261	7.90623	8.23717	5.12012	9.47196	7.24189	6.71933	9.75645	7.85143	9.96944	10.3662	9.34006	3.96754
HMMR	1209	7.60389	5.29332	2.7805	5.16767	3.50861	1.15274	6.10374	8.68111	7.75408	7.42246	6.95238	4.18554	2.73068	8.13462	4.9455	5.02221	4.91114	5.31741	5.49688	3.17446	0.927786	5.48389	5.46428	5.69314	4.8667	6.97253	7.47058	7.11047	4.8563	4.11221	3.5768	0.380368	3.44565	0.24337	0.438291	0.169122	1.04958
CHFR	1210	3.73009	4.1776	3.73225	3.50698	3.64293	4.08258	3.25837	3.95872	3.49851	4.14205	3.62577	4.03391	3.26553	3.18245	4.27274	3.70781	3.98655	3.68669	2.42113	3.44014	3.50671	3.59409	3.3326	2.98389	3.37351	2.91648	3.43269	2.6739	3.73443	3.5614	2.71406	4.71624	2.88791	5.59246	5.61196	5.62027	2.81583
TRHDE	1211	0.057771	0.03188	0.757847	0.313534	0.580336	0.769487	0.226756	0.344492	0.094787	0.107049	0.599601	0.368869	0.842314	0.190616	0.040022	0.091537	0.023905	0.128481	0.769299	0.610596	0.697145	0.238159	0.082558	0.909005	0.100245	0.327252	0.228478	0.166448	0.087858	0.20443	0.155959	0.429345	0.16871	0.095864	0.044692	0.10935	0.410017
P4HA2	1212	0.277412	0.22529	0.498973	0.322544	0.506495	0.700449	0.297216	0.694438	0.329167	0.125491	0.93676	0.293465	0.40945	1.25929	0.275781	0.29714	0.36415	0.589535	0.227872	0.866937	0.848124	0.508175	0.445893	0.500454	0.431955	1.04114	0.577684	0.245425	0.819791	0.45627	0.843973	0.499781	0.266465	0.477888	0.371004	0.404896	0.448504
FCGR2B	1213	0	0	0	0	0	0	0	0	0	0	0.006675	0	0	0	0	0	0	0	0	0	0	0	0	0	0	0	0	0	0	0.005666	0	0	0	0	0.005468	0	0
NFATC3	1214	8.8374	9.8447	5.12783	9.1031	6.7517	2.83372	9.72967	3.86096	7.15643	6.27694	4.88607	8.27488	5.52222	7.43163	6.17407	8.22904	9.07875	9.04892	7.87524	2.38198	2.60785	8.14758	11.0537	7.87524	8.18492	7.25863	10.4774	10.325	8.02021	8.15074	4.39966	4.02879	8.11687	3.7403	4.68585	4.53582	1.37722
TRNT1	1215	6.27037	4.88375	3.79985	4.66338	4.60164	3.33675	4.49486	3.47136	6.03654	6.67453	5.81291	4.09086	4.29149	5.19087	4.98001	4.30602	3.12105	3.35901	3.20937	2.43024	2.96413	3.01674	3.10842	3.53376	3.78471	4.059	3.73597	3.05403	3.12185	3.52216	6.09579	3.67069	3.85546	3.69328	3.78069	4.07272	8.12869
ACADVL	1216	17.7861	19.5381	12.6953	14.3502	16.049	21.6057	15.4096	12.5413	18.5361	17.2647	22.1193	15.6094	12.6222	24.4397	14.5337	17.1687	24.5887	24.6448	15.8117	10.3246	17.3304	20.8962	24.3978	20.3836	16.3825	21.1984	21.7059	17.4189	25.5109	18.0186	18.9446	11.4502	16.6049	11.2153	12.3192	7.67424	6.70756
STK10	1217	1.09103	1.99164	1.01618	0.881352	2.02955	1.32472	1.10529	0.714181	0.822954	0.745159	1.37826	0.992188	1.13179	1.79383	1.26737	1.77906	1.51678	1.4811	0.808615	0.79412	1.07213	0.875652	1.25221	0.885586	2.17382	1.62025	1.9675	0.827823	1.68225	2.44939	1.05662	0.766956	0.844187	2.53073	4.0494	1.29117	0.313591
FBXW11	1218	18.3975	17.8025	20.9094	18.8747	20.4429	16.2315	19.6889	16.7137	15.7347	14.7557	14.6459	18.9632	23.105	15.9868	17.1003	18.4173	20.0336	19.6349	24.6229	19.3831	21.2747	18.1724	19.4061	21.3275	25.4567	23.9641	22.7693	22.4274	19.0232	25.376	18.5403	18.6873	20.0974	20.4013	22.7334	19.7213	19.6688
ACAP1	1219	0.598991	0.409385	0.696061	0.36664	0.459179	0.968456	0.445068	0.454449	0.409674	0.671343	0.751613	0.422263	0.436053	0.706322	0.359343	0.521672	0.475225	0.443488	0.445663	0.595529	0.644257	0.567312	0.58744	0.481239	0.250396	0.400221	0.343585	0.287407	0.584183	0.391481	0.658314	1.35399	0.460254	0.441532	0.316998	0.32804	0.797651
CRMP1	1220	164.599	203.973	350.927	258.355	293.919	321.697	247.317	350.301	137.093	161.877	147.999	259.251	304.794	144.637	232.529	208.538	180.713	181.537	263.779	427.607	317.688	181.426	130.25	200.24	209.729	206.65	172.261	229.048	197.18	214.651	220.406	328.298	255.812	302.288	246.885	342.413	194.332
EVC	1221	9.28212	13.2674	18.6511	13.8746	15.9208	19.588	14.1813	20.462	8.2612	8.90877	8.69272	16.4023	15.2376	8.72572	13.4708	13.1065	12.9945	13.1369	14.5376	21.1215	16.7989	11.3786	12.3006	11.0126	12.7392	12.9093	12.4805	13.5046	13.9399	13.6558	11.7445	16.1255	13.2046	14.9106	12.5918	18.1885	7.75925
DERL2	1222	9.08711	7.86001	8.56176	9.04925	8.69037	6.84746	8.2814	7.53668	10.0415	9.35848	10.772	7.59363	9.31616	9.60498	8.47624	7.50327	5.05184	6.07702	7.28171	6.44414	7.29601	6.03858	5.52662	7.67665	6.60944	6.83211	6.32636	6.94704	6.02226	6.2223	8.71604	7.2048	8.18748	6.19347	5.67403	6.47318	8.01434
SIDT1	1223	0.199925	0.248628	0.498735	0.169751	1.71906	0.979656	0.093001	0.048345	0.30086	0.392626	0.754275	0.144605	0.346754	1.27768	0.384436	0.201075	0.125544	0.5447	0.158451	0.090947	2.14921	0.124625	0.182387	0.622554	0.668266	1.98034	0.541004	0.153359	0.53716	0.459016	1.73125	0.164433	0.176749	0.517642	0.694634	1.00878	0.11984
NDE1	1224	6.09284	9.91802	4.0095	7.92423	5.69513	2.47086	9.70564	4.1628	5.94124	4.57754	3.94777	9.48886	4.12945	6.29296	5.16827	8.38889	15.5845	13.6131	9.91102	2.9952	2.90301	13.0253	19.8947	11.695	8.41777	9.73232	14.0969	15.1489	13.6845	11.2586	3.33551	1.49727	5.61273	0.604319	1.20373	0.784659	0.281184
MRVI1	1225	0.379251	0.478119	0.434026	0.372029	0.860757	0.491211	0.259146	0.193126	0.336359	0.262399	0.544249	0.296318	0.442284	0.761008	0.38225	0.408806	0.265465	0.449004	0.421119	0.373713	0.951105	0.472487	0.352972	0.499802	0.558481	0.571749	0.503033	0.34734	0.383617	0.376436	0.362871	0.285838	0.337994	0.268729	0.405404	0.274394	0.205868
TMEM38A	1226	0.794801	0.617072	1.85481	0.848246	0.618289	3.43537	0.538085	1.16769	0.52636	0.524597	0.888838	0.877127	1.48141	0.814957	0.315032	0.529608	0.364686	0.700075	1.6003	1.37393	4.36594	1.0394	0.531218	0.991904	0.647945	1.19887	0.665068	0.566391	0.936344	0.520842	1.62793	2.73895	1.45663	1.16537	1.98772	0.876941	1.09414
AP1M1	1227	39.8648	41.8093	54.8666	46.8244	48.1831	53.5711	45.9135	53.7491	36.3709	37.1798	32.53	46.8211	49.4238	40.1772	38.3369	42.0918	36.7354	41.2619	40.8026	63.2622	57.3567	34.3742	37.884	34.4058	34.3708	42.3169	38.0291	43.2884	43.0964	35.6787	33.4208	44.2359	39.3147	44.2551	43.3201	39.8134	21.6398
PVR	1228	2.08246	3.37015	3.58108	3.14324	3.33597	4.05527	2.84604	2.37353	1.71105	1.30098	1.84261	3.31901	3.51514	1.75148	2.30491	3.10838	4.78627	4.86835	4.7389	4.61313	7.21786	4.81263	4.8018	5.3242	5.63135	4.32236	5.90835	4.65568	4.59727	5.49839	2.89774	6.0943	2.66363	5.00029	4.9048	4.25648	2.00597
IKBKG	1229	0.733522	0.844042	0.967888	0.884007	0.924212	0.961448	1.08882	1.11549	0.806098	0.876306	0.837453	0.827876	0.734445	0.854169	0.968006	1.03283	0.852791	0.787967	0.699553	0.91461	0.684156	0.724999	0.811789	0.471692	0.704495	0.710766	0.716825	0.75163	0.83218	0.621955	0.69091	0.692548	0.68141	0.851937	0.903251	0.973816	0.32145
XRCC1	1230	38.7247	34.1124	29.7936	34.0873	31.952	31.5881	37.6369	30.6819	36.0558	31.3943	28.8735	34.4223	25.907	36.4402	29.4197	35.3869	32.9061	32.4455	28.7568	18.3633	20.544	26.7906	36.7012	22.2408	24.4126	30.9131	35.1166	32.1422	31.0759	27.1023	19.8403	18.4123	24.0092	15.3531	20.3254	16.6275	7.84119
SCARB1	1231	3.36822	3.44587	2.6322	1.78097	4.50844	2.33424	2.27324	0.882099	2.86827	2.56155	2.53346	2.06065	2.80751	4.26959	2.7831	3.77169	4.57717	4.49268	2.58029	1.35858	3.46661	2.46761	3.82946	2.56266	5.32506	6.59021	5.43763	2.41253	7.14474	5.12243	5.43985	3.53627	2.84383	5.38637	7.33724	4.23374	1.35474
CYP2W1	1232	0	0.021712	0.015845	0.051271	0.013597	0.030464	0	0.014697	0.032594	0.035044	0.005238	0	0	0.151041	0	0.026678	0.058785	0.044236	0.011364	0.031164	0.006892	0.01941	0.024247	0.027958	0	0	0	0	0.108579	0.024554	0	0.041842	0	0	0.013808	0.049469	0.012179
MCM2	1233	95.4306	64.2719	34.3873	65.5841	38.3502	14.2372	69.893	33.6373	83.2461	67.3998	37.6033	53.8769	32.8789	76.6166	57.0392	73.1033	72.2308	70.8578	55.204	14.1551	13.1164	56.7842	92.9197	42.8248	34.2729	71.9832	64.2673	102.704	84.2231	41.594	28.9466	8.87256	47.1956	4.06732	5.76659	4.91124	3.38325
MOV10L1	1234	0.031074	0.013603	0.025325	0.004861	0.016262	0.156257	0.025595	0	0.016301	0.007097	0.04746	0	0.047898	0.038423	0.013547	0.031979	0.052988	0.049298	0.061482	0.154593	0.285807	0.063364	0.021651	0.091752	0.014284	0.093397	0.069284	0.030348	0.02917	0.067978	0.070845	0.079212	0.029841	0.071168	0.033253	0.072736	0.092474
PANX2	1235	1.38368	1.67331	1.48506	1.40481	2.04731	5.35123	1.01444	1.31535	1.15215	0.883249	0.990045	2.14158	1.7859	1.22575	1.52186	1.78068	2.11036	2.23887	1.62795	4.38967	5.61026	1.34236	1.40323	2.09124	1.80912	1.7263	1.64937	1.28963	2.70612	1.9177	1.61961	2.56041	0.793016	3.628	2.52839	2.51253	2.36917
RP3-402G11.5	1236	3.92214	5.88474	2.46151	3.36221	2.97383	6.92025	3.60096	2.38506	2.83533	3.16672	2.44702	4.98802	2.61792	3.38218	2.7795	4.29272	8.28293	8.54947	4.60575	3.34172	6.73151	7.85154	9.36107	6.42262	4.98146	4.38695	7.23454	6.18915	9.58727	5.86162	3.48171	7.38454	4.68564	5.47858	5.97665	3.12051	1.90671
TP63	1237	0.048292	0.048891	0	0.022489	0.060601	0.007049	0.00475	0	0	0.006567	0.137596	0.021346	0.013761	0.015296	0.049888	0.03469	0.016393	0.098056	0.012776	0.011522	0.05737	0.006145	0.020239	0.028874	0.045367	0.035577	0.021613	0	0.056266	0.058294	0	0.00565	0.005321	0.025092	0.01028	0.018998	0.023962
ALPK1	1238	2.78555	2.89258	0.3437	0.133023	2.87628	0.227217	0.761877	0.835688	1.71371	2.00306	1.15314	0.654923	1.29877	1.85892	2.48803	3.06627	1.72814	1.61468	0.387386	0.528471	0.203678	0.400223	1.34	0.173868	2.85962	2.29632	2.88448	0.247808	1.77465	2.58142	1.65493	0.277707	0.296871	1.90895	2.25636	1.33061	0.277223
LLGL2	1239	0.295526	0.324643	0.306392	0.282349	0.299798	0.132369	0.111343	0.176393	0.184627	0.141584	0.483857	0.076707	0.131978	0.496562	0.146322	0.273953	0.193223	0.226487	0.10338	0.073022	0.264511	0.16435	0.197779	0.145511	0.308558	0.366902	0.350029	0.152534	0.460089	0.2773	0.258101	0.192945	0.17261	0.453906	0.845333	0.551035	0.085961
PDE8A	1240	0.559907	1.35748	0.640786	0.814793	0.940197	0.720358	0.592942	0.446464	0.68942	0.816794	1.36378	1.04547	0.553956	0.978667	0.823992	1.0227	1.04367	1.02208	0.489043	0.27765	0.632503	1.19502	1.10797	1.28535	0.697078	0.389005	0.904996	0.673494	1.06137	0.903317	0.453204	1.29843	0.749424	0.413691	0.417105	0.571017	0.320562
CLCN4	1241	6.98422	13.5081	16.5966	5.32653	25.2858	17.1978	5.89654	16.9463	7.65404	9.39118	12.5272	10.2041	21.7861	6.91428	15.9686	12.2972	13.3673	13.0571	13.6046	26.9473	25.7782	7.62083	4.84104	10.9172	27.8295	14.4936	13.9379	2.44342	13.0165	24.606	18.7099	18.3504	11.0402	31.0051	25.3584	43.6833	28.9881
NLE1	1242	9.55253	8.09322	10.6404	9.1099	8.77422	10.2189	8.60611	6.29377	9.48371	9.34941	8.49515	8.93596	10.6433	9.0785	8.22333	8.78315	10.0499	9.93482	11.7976	8.28753	10.5515	7.92026	9.4437	8.51238	8.06461	11.9162	9.55964	11.1948	10.0282	8.67989	9.99108	15.8101	11.9792	13.2333	14.3984	11.6949	7.59496
SDHA	1243	9.66696	9.0941	9.73724	9.68281	9.35625	10.6578	9.14737	7.3042	8.36877	8.28403	7.40585	9.82173	9.043	8.33345	8.37164	9.54827	8.21537	8.5102	9.30986	8.55329	10.2135	8.12538	9.02352	7.85746	8.66045	9.42533	9.52591	9.59701	9.68969	8.37528	6.37993	10.5603	8.53898	9.13394	8.5717	9.17785	4.42248
SMARCE1	1244	18.7439	17.3198	19.3058	23.5026	16.751	16.4786	20.6322	28.374	18.1759	19.3551	19.1252	21.0672	18.9541	20.2172	19.906	16.8318	10.6709	10.3133	13.3094	14.9191	11.1767	11.8888	9.85446	13.5511	12.0819	11.4946	11.8086	13.2789	9.45162	12.1024	11.1451	13.619	14.9884	9.83174	10.8139	10.3006	13.7701
FNDC8	1245	2.03372	1.63661	1.93176	1.73435	2.17177	2.40512	1.55303	1.67137	1.2208	0.786659	0.870667	1.61473	2.55984	1.70831	1.19568	1.72349	1.37054	1.53547	1.83474	1.36959	1.81556	1.32701	1.6381	1.98412	2.11162	1.69431	2.06482	1.29262	1.49829	1.43527	1.69206	5.35121	1.75636	3.94183	2.98567	3.21701	1.54947
GSDMB	1246	0.066343	0.427968	0.045578	0.080718	0.080551	0.399289	0.083968	0.090714	0.088445	0.045191	0.066344	0.169462	0.086538	0.06685	0.014967	0.156641	1.02612	0.9751	0.115024	0.429967	0.552957	1.33422	0.97124	1.08579	0.603779	0.150959	0.669254	0.18249	0.685301	0.479066	0.109876	0.472031	0.155473	0.675722	0.412795	0.175206	0.096225
KDM5A	1247	7.6514	8.32791	6.83061	6.93232	6.88362	4.39961	7.8249	5.94963	7.14979	5.17458	5.19111	6.40379	6.36556	8.2991	6.43889	7.83805	8.1419	8.05418	8.00488	4.94497	5.26099	7.33232	8.98067	7.54806	9.13604	9.79804	9.62716	8.44079	7.94927	7.7313	4.56852	4.71002	6.54313	6.32317	6.29492	7.10508	3.12068
ADAM11	1248	0.256368	0.772731	1.35357	0.511612	0.853262	2.40977	0.259898	0.95142	0.652775	0.486963	0.587849	0.91492	0.588553	0.462816	0.454514	0.515408	1.22895	1.16312	0.473449	1.98528	2.31403	1.43476	0.846783	1.43312	0.443834	0.426256	0.393367	0.287932	1.41366	0.732813	1.24893	5.03956	0.62562	4.24566	2.48061	3.01568	1.4477
PPP2R3A	1249	6.81412	7.27551	9.98896	6.84729	9.70879	10.6955	7.9557	5.03354	6.00194	4.76206	4.53528	8.16542	12.9314	7.27681	6.59647	6.86334	6.95221	7.35824	9.56902	6.39551	13.9853	5.84872	5.90211	6.92856	13.0158	11.3169	10.1483	5.78968	8.70393	10.6771	8.94442	7.3523	6.92	7.91822	8.05565	11.794	6.12169
FERMT2	1250	9.97696	10.4663	6.1883	9.54651	9.40912	4.41934	9.96239	5.00806	8.44256	8.89922	9.79269	8.72804	6.58109	7.85785	9.19343	9.80698	12.2235	11.5747	10.9936	5.00702	6.41402	11.1522	13.6378	11.2537	11.8132	10.3072	12.5126	13.4057	10.5662	12.0304	7.20739	3.94685	7.48724	7.23778	3.75301	5.51393	6.06497
ABCB11	1251	0.013952	0.035073	0.048522	0	0.014603	0.197741	0.041016	0	0.017502	0	0	0.015397	0.006617	0.036477	0.008919	0.035814	0.118346	0.117056	0.095765	0.008141	0.310739	0.17347	0.253691	0.158141	0	0.007374	0.156735	0.121748	0.051516	0.091672	0.025567	0.024341	0.100409	0.00606	0	0.013656	0.008642
DHRS9	1252	0.028672	0.009733	0.078807	0.016653	0.030147	0.033467	0.037718	0	0.024088	0.013037	0	0.010595	0.018091	0.040218	0.024888	0.029574	0.043592	0	0.012683	0	0	0.012036	0.030137	0.045208	0.026241	0.010149	0.021165	0.011242	0.010031	0.021147	0.199721	0.078066	0.033406	0.22463	0.386528	0.152288	0.011733
CD5L	1253	0.043986	0	0.071052	0.135821	0.336592	0.702777	0.186821	0.148614	0.073077	0.059463	0.266052	0.080904	0.343378	0.702363	0.076016	0.060221	0.115828	0.016642	0.019369	0.860325	1.10521	0.093167	0.060952	0.157299	0.039804	0.077291	0.04915	0.085841	0.046165	0.096668	0.090302	0.171308	0.337718	0.127203	0.015584	0	0.090573
PTGS2	1254	0.040977	0.041541	0.024934	0.063407	0.028658	0.031995	0.04706	0	0.068347	0.092826	0.174367	0.02256	0.006405	0.064662	0.035248	0.063066	0.023204	0.054385	0.063175	0.082103	0.089349	0.147176	0.042876	0.111757	0.056126	0.072166	0.083926	0.120006	0.028997	0.04462	0.042271	0.047876	0.014962	0.06533	0.06538	1.25169	0.084452
IGF2BP2	1255	19.177	29.3004	13.1045	20.0577	19.9349	10.4836	24.6742	9.09744	18.0254	15.0223	10.4991	24.217	14.5206	15.3602	16.6878	25.1578	29.7558	26.6736	14.2002	5.62365	7.359	18.3163	31.6274	14.8744	25.3486	18.9449	31.6432	18.3648	23.2268	25.2539	6.6097	6.28386	6.9234	8.27084	9.32706	5.53312	2.22816
MAP3K13	1256	2.75133	3.1553	3.5142	3.18854	3.66015	5.07904	3.75462	5.13096	2.74135	2.58627	2.61095	3.58264	4.0576	3.6653	2.99477	3.07741	2.63277	2.57077	3.8293	5.17587	5.35737	2.99507	2.80068	2.96171	3.82973	3.20833	3.48085	2.84163	2.4232	3.75654	3.08962	3.82546	3.197	3.40558	2.82032	3.10793	3.21745
ST6GAL1	1257	4.86884	5.28782	7.47904	5.00656	9.43846	5.85909	6.38554	6.81705	2.91615	4.31675	4.36824	5.3364	9.46282	6.28777	5.95171	5.68846	5.27969	5.04574	9.42955	8.90611	8.69688	5.19404	4.62848	5.57777	13.6174	8.2107	8.56789	7.1961	5.3985	10.6525	5.30278	7.48969	6.74874	14.6595	12.824	8.23408	4.9112
TBX21	1258	0.014014	0	0.017093	0	0	0	0	0	0.034923	0	0.109086	0	0	0	0.018164	0	0	0.047504	0.018513	0	0	0.052706	0	0	0	0.014815	0	0.032818	0.074208	0	0.034476	0.016373	0	0.012174	0.014694	0.083241	0.01736
VDAC1P1	1259	27.0824	26.0371	39.9984	33.9549	25.8112	25.4191	29.704	31.2214	23.9862	24.1109	24.0865	31.5363	33.7424	27.0382	22.4176	23.2677	30.8939	30.8953	32.2392	48.2298	39.2678	31.0749	29.5875	29.5763	28.7547	32.1523	25.077	31.3197	30.6256	26.8331	27.1155	35.8309	31.3995	25.1624	21.6841	26.456	23.6379
FRY	1260	1.1857	2.76748	6.80644	2.84632	3.92032	7.13185	3.76056	2.54105	0.976487	0.697233	1.12265	5.78271	6.75209	1.3114	1.70257	2.15007	3.42845	3.02826	6.67075	11.883	12.3658	4.89702	3.87469	6.53794	5.20078	3.5411	3.31466	3.23994	2.82625	4.44182	4.17229	15.782	6.81729	8.25094	5.27428	6.81453	10.8419
PICALM	1261	30.4271	30.6814	29.105	35.9914	29.3848	25.7906	32.642	35.1258	27.3289	29.9767	29.1098	32.5378	29.5537	29.4029	28.0243	31.1	27.1752	27.5784	31.9127	37.1794	30.6926	26.9679	26.7052	32.8418	35.3579	31.6405	34.3766	32.0564	26.6232	33.1621	27.7404	25.9246	27.7424	37.5035	36.7376	39.5558	34.6293
NSF	1262	13.6717	13.6323	23.1664	13.6228	19.8666	19.6525	12.8539	15.7321	11.4539	11.3498	11.8788	14.6565	27.532	13.4739	11.2262	13.8864	10.42	10.2129	18.5951	29.0277	25.6275	10.6403	10.1473	17.2114	21.0925	16.3092	13.5332	10.4472	11.4255	17.9314	14.962	20.516	11.9323	21.4226	23.6374	20.0372	28.868
GLI2	1263	4.11663	8.66191	2.8352	3.69894	4.74311	2.77033	9.44592	3.26741	3.09792	1.81364	1.17663	9.66542	3.4775	3.93966	3.24907	6.86763	11.5119	10.7954	7.71242	2.49575	3.02156	12.356	15.882	5.40332	7.38032	6.251	11.1826	13.0757	9.8682	7.71682	1.43485	0.829059	5.36217	0.238552	0.31246	0.131227	0.170005
CLASP1	1264	14.106	22.3066	25.3611	20.9709	22.6338	23.7164	24.6182	19.6739	12.5317	10.3994	9.35128	24.2783	24.1668	14.5411	14.7722	19.3812	21.7843	21.3391	27.8423	31.0995	30.6544	19.3775	19.504	22.2593	28.1864	23.9635	24.7103	22.2757	23.4668	26.0246	17.4	23.5615	23.8974	37.4959	28.6462	38.0318	11.0608
MRPS34	1265	59.7651	45.9556	54.3554	49.8289	47.3821	53.7048	53.0831	49.8353	66.3873	71.5401	63.7887	50.7254	47.8443	51.4057	61.9724	55.0598	41.7602	41.9825	32.6224	25.5945	33.6858	32.4809	37.6195	25.3316	23.0615	36.8916	31.5702	43.7861	42.1866	31.2098	47.75	44.4849	51.198	41.7848	42.4694	28.561	31.9477
NOTCH3	1266	21.1265	32.3463	11.0439	16.956	20.3287	19.7841	23.7221	6.77207	17.1921	8.5638	5.46377	18.7906	12.3015	24.9173	12.0777	29.632	39.2072	43.0443	23.5145	8.85419	20.9685	23.0693	55.2403	19.2278	18.916	44.1313	37.0728	38.0925	55.9491	22.5937	11.6813	4.41474	17.3779	3.57871	4.98712	3.79096	1.74365
CLNS1A	1267	42.9316	24.6986	20.9125	28.3505	19.5872	12.0914	28.3601	18.8229	39.6531	45.3049	34.5999	21.241	20.1635	37.3325	29.8506	28.6446	19.1864	18.2849	20.4258	9.77405	11.0892	16.7065	19.6374	16.9386	16.8741	24.7814	18.4392	21.6821	18.633	16.0982	28.5919	9.46741	26.2179	8.96877	11.7962	9.9747	16.8323
PPP2R2C	1268	1.26283	1.64555	6.01034	1.62802	4.55181	11.0617	0.825388	0.870816	1.54035	1.11471	2.38562	3.42561	8.37048	1.37932	1.37194	1.4774	1.15092	2.00916	7.00404	6.57146	16.0799	2.63071	0.23693	7.44154	3.95799	3.81071	2.11103	0.572027	2.48668	2.01469	4.36651	14.1022	4.17887	4.35217	3.55443	6.95758	7.79758
TEAD2	1269	68.281	46.681	29.107	47.3433	31.6563	20.047	52.5896	61.5334	69.6275	63.2242	44.4648	34.856	25.5802	76.9368	44.041	48.2198	41.4919	37.189	29.6349	13.7044	12.7783	25.1423	41.479	22.2791	22.4981	43.7195	35.606	39.2305	42.2036	24.7721	25.9402	4.14431	44.1753	4.36866	4.56193	3.50146	4.1034
EED	1270	6.13064	5.15587	3.72099	5.17486	3.64481	3.03209	4.54581	4.35035	7.10722	6.21878	4.57637	4.52576	3.3253	5.12116	4.50312	5.28106	3.37614	2.84555	2.67944	1.41032	1.7495	3.54185	2.98389	3.61981	3.06735	3.38836	3.57866	2.87373	3.42242	2.61521	3.97826	3.0182	4.49852	3.42375	4.77827	3.65547	2.80217
CDHR2	1271	1.50835	2.29185	2.45153	2.01227	3.60011	4.76452	2.34818	2.34	1.14059	1.06393	0.905709	2.6976	2.89089	0.887678	1.97818	2.30557	2.25613	1.85579	2.60857	3.45632	4.40974	1.86629	1.31629	2.22421	3.41953	1.91236	2.60666	1.50848	1.96023	2.63813	2.47648	3.75504	2.78417	5.98109	4.13768	2.98686	2.22154
SNCB	1272	25.634	34.1414	8.28663	0.918248	55.8784	21.6672	11.8246	0.471861	16.1085	28.8038	9.25782	4.33657	22.7963	10.4086	39.6995	39.4018	11.4159	10.4075	5.3033	1.32319	12.2577	2.01769	9.37681	2.62624	22.6049	16.9138	15.8761	0.275167	12.6021	18.281	36.2188	2.56196	4.12222	26.1243	23.5957	4.63221	4.48907
TSG101	1273	24.9605	22.4836	26.7512	22.4574	24.5001	24.202	24.4585	28.2178	23.3203	29.0666	25.6418	22.6251	25.8768	20.8688	28.3413	24.1403	18.9663	18.3698	19.3929	19.6552	20.5864	15.3729	17.3861	18.098	20.6451	20.707	18.3313	18.7938	17.5641	20.3465	24.9584	24.0127	23.9695	23.3902	24.5875	24.3535	23.7869
C17orf85	1274	8.62649	11.3841	9.13209	9.85865	8.59257	9.27716	9.53454	12.5821	8.08505	7.37687	7.72027	11.8586	8.24394	10.5728	9.75726	9.82033	12.0553	11.6892	9.00055	12.1387	7.66051	11.1441	12.9564	11.0442	11.9885	9.40404	13.387	10.9916	10.8095	11.9168	6.66296	8.88722	8.15034	8.4411	7.49076	10.1137	6.29559
ATP2A3	1275	0.382888	0.588157	0.609229	0.471993	1.15177	0.828202	0.382921	0.760941	0.314299	0.430017	0.727454	0.600746	0.593374	0.982933	0.576163	0.575134	0.349826	0.548707	0.436248	1.04868	0.9182	0.429811	0.431001	0.496336	0.471466	0.687551	0.475864	0.370554	0.805419	0.531964	0.745934	2.21906	0.590547	0.830401	0.96637	1.18852	0.819664
CA12	1276	15.3182	18.3325	3.40545	5.3833	15.3552	5.28764	10.0439	0.20921	6.47269	9.38647	6.41399	8.14926	8.60377	4.45486	13.9568	20.9521	26.3715	20.4643	10.3137	1.58068	9.27886	11.6625	38.4895	8.35633	22.6865	12.8916	23.5294	11.6919	13.3865	26.063	7.88318	1.48138	8.47319	4.64755	5.01981	2.91303	3.86055
MGLL	1277	2.25794	3.925	1.6132	1.50055	6.48219	1.17231	1.74199	0.346532	1.38057	2.25822	2.7574	1.62644	2.43949	1.54862	3.27465	4.41609	4.97492	3.69946	1.81419	1.51437	2.71633	3.15656	1.82935	2.84218	8.68671	4.24603	5.91513	2.6133	4.15175	9.11622	2.89707	2.14771	1.37364	21.9245	28.7444	13.4123	1.58091
NTN4	1278	2.28232	5.36932	5.21574	18.408	3.30186	5.04189	8.05332	3.20818	4.37101	5.5312	2.31928	11.5399	3.77006	1.99796	5.32053	3.98135	6.73546	5.73576	5.46419	2.46803	4.94656	8.92222	6.08175	19.9414	2.37621	1.83466	1.65847	10.1031	4.19567	2.67564	5.07974	6.81817	6.03307	4.42541	1.2429	4.98228	4.0882
BCS1L	1279	7.01655	6.15927	7.98987	7.07317	6.83997	9.15792	6.97785	6.3137	6.53686	6.89924	6.39799	6.99123	6.42242	6.29992	6.60135	6.82485	8.38852	7.04072	7.87519	6.6469	9.76937	7.91867	7.26828	6.19767	5.81663	7.45276	6.78489	9.3588	8.12064	6.86834	8.40641	8.88438	8.4764	8.33687	8.04379	6.54295	5.24572
NUAK1	1280	11.563	20.4719	13.0629	8.6675	21.8268	12.4963	10.1521	22.9823	11.3313	13.9655	10.0814	12.63	15.3129	8.43465	20.793	17.9152	19.889	15.4679	9.16318	20.8853	14.923	9.55227	18.3814	8.35871	24.8702	12.8865	14.1302	5.94831	13.4632	22.5747	9.34841	13.5433	5.47311	30.6747	15.645	15.5661	11.7182
DPP8	1281	2.06172	2.71815	1.80477	1.81205	2.53431	1.83264	1.88861	1.43455	2.06968	1.94176	1.99117	2.27374	2.32025	2.20803	2.20909	2.39885	1.9752	1.9989	1.4985	1.20207	1.69488	1.94673	2.24709	2.19263	2.16153	2.0825	2.52876	1.50249	1.80461	2.10742	2.63858	1.88201	2.01429	3.03413	2.65041	2.82628	2.56088
SLC24A1	1282	0.343378	0.569299	0.423998	0.409319	0.617723	0.584273	0.343635	0.337289	0.414408	0.327842	0.564811	0.406956	0.394791	0.805917	0.39582	0.505704	0.232073	0.279081	0.378478	0.304253	0.462676	0.328839	0.270858	0.459295	0.424459	0.516452	0.508221	0.276214	0.354685	0.529638	0.489457	0.395738	0.446868	0.520949	0.654198	0.522856	0.500567
ZNF532	1283	16.9211	31.2687	20.4325	25.6206	24.3002	27.2375	27.4186	16.876	15.2815	10.3727	10.5981	31.4999	22.0469	19.3223	16.2895	25.6115	41.6574	40.8588	37.1818	31.5957	37.7279	37.877	45.6278	39.3673	42.4473	37.171	46.6471	40.2839	42.1104	43.402	20.1217	24.0032	24.0781	27.8825	28.4954	25.8161	10.5559
SCARF1	1284	1.40796	1.34628	1.0174	0.902789	2.32001	1.37072	0.932091	0.519863	0.863467	1.20409	1.53791	1.04465	0.821517	2.1754	1.2707	1.54132	0.659715	1.02087	0.565056	0.537456	1.26391	0.507848	0.837149	0.723845	0.954736	1.35354	1.2224	0.817359	1.07526	0.910236	0.722403	0.817725	0.687722	0.894407	1.39002	1.11534	0.491019
LMAN1	1285	12.6884	10.6793	7.81947	11.5547	10.2816	7.26482	9.2357	13.2366	11.9665	12.0753	16.3632	10.3424	8.24047	17.4166	10.9493	10.5191	9.71354	10.7627	9.17328	9.34673	9.86819	9.90366	9.52613	12.3233	10.1837	12.0117	12.2875	11.2976	10.022	11.7158	9.31698	7.52321	8.0729	7.6191	7.80454	9.70928	13.9954
PTPLAD1	1286	84.2635	63.9431	58.2009	76.73	58.4121	46.0753	67.0861	72.1439	84.9956	84.5762	80.9962	63.415	63.3909	87.2004	71.4249	67.5261	38.551	44.1394	52.4634	44.99	40.58	39.2909	45.5337	46.6361	45.2313	52.2561	45.4857	47.613	38.8132	43.2527	65.7492	35.9102	52.2747	34.4226	35.6233	34.1743	113.588
IPCEF1	1287	0.977857	1.27109	0.759608	0.252824	0.675864	0.289256	0.333961	0.258852	0.981014	0.735202	1.08414	0.593862	1.06813	0.389556	0.669156	0.950101	0.832631	1.04556	0.841324	0.203819	0.272805	0.506878	0.857108	0.346004	0.880871	0.615079	0.80883	0.228864	0.969062	1.27598	0.294266	2.29696	0.949577	1.08604	1.3642	1.04106	0.505996
ZZEF1	1288	2.39142	6.02309	3.49835	3.46987	4.52048	5.79267	3.87493	2.08081	1.96778	1.24295	0.909661	5.31444	3.9058	2.36979	2.43752	4.51241	7.5518	6.93194	6.14724	4.60751	6.67254	5.91575	8.00526	6.18913	8.4061	6.08524	8.47098	6.02366	7.19377	8.11642	3.25	6.41256	4.43325	6.90177	6.9371	7.14762	1.66808
NOX3	1289	0.017572	0	0	0	0	0.020604	0	0	0.04379	0	0.022489	0	0	0.064595	0	0	0.019676	0	0	0	0	0.022331	0	0	0	0	0.019369	0	0.01861	0	0.26026	0	0.034751	0.03053	0.01792	0	0.021474
ENO1	1290	214.803	137.533	127.439	168.549	115.188	116.962	167.985	138.136	215.835	183.302	147.856	131.656	106.546	261.865	141.795	157.019	166.941	168.653	136.254	120.858	124.206	131.511	170.999	113.502	91.594	233.412	130.558	182.607	204.001	109.026	123.03	73.2416	116	60.7535	60.5491	54.3011	64.0365
SLC12A1	1291	0.011478	0.02818	0.04181	0.016341	0.025499	0.068345	0.013498	0.026103	0.05074	0.022532	0.027301	0.032228	0.126913	0.031861	0.020494	0.017318	0.032528	0.025879	0.059467	0.025381	0.058704	0.019102	0.02929	0.056379	0.00779	0.025424	0.020896	0.008091	0.019144	0.027389	0.045063	0.032341	0.027967	0.038733	0.015644	0.03804	0.043964
C19orf10	1292	40.1944	33.9176	39.7837	34.2789	41.2681	51.1846	33.6763	42.6294	57.7907	58.6564	75.6435	31.7525	34.1572	43.7128	42.6845	37.4595	26.7172	27.8974	25.5679	24.0238	29.897	25.1126	25.3404	21.6812	18.0162	28.6659	22.2095	27.8229	33.156	21.6733	47.6981	36.7403	43.349	34.737	36.5113	28.9904	34.2411
ANO8	1293	5.13241	10.0974	7.98218	6.8746	9.87552	22.114	8.46326	9.04921	4.73663	4.19452	3.62138	12.179	8.88786	5.07686	6.24149	9.34346	13.2465	12.1567	8.27641	13.3417	18.5103	13.2165	13.0167	11.5273	11.3615	7.32643	12.9246	8.06404	12.7263	12.3325	6.82751	14.0534	6.50436	17.6319	17.8027	14.8616	4.35661
TUBE1	1294	2.99399	2.89909	2.43128	2.81825	2.34308	2.41719	2.96296	3.51463	2.56391	2.84967	3.61909	3.14528	2.4968	3.2982	2.59381	2.1769	3.94854	4.2186	3.01732	2.34722	2.44249	5.61435	4.0762	5.94696	3.49896	2.20274	2.96848	3.62439	2.92724	2.55131	3.89834	3.37136	3.93516	2.44566	2.71189	2.23434	5.20526
ARHGEF10L	1295	2.8186	5.22312	4.19097	5.05174	4.74704	8.46795	5.17802	5.66928	3.43831	3.51139	3.87538	7.60218	4.20663	3.42211	4.02573	3.88676	7.96385	7.56607	4.92668	7.35281	7.38191	7.97113	6.74646	6.78735	5.15112	3.59497	5.37985	5.5555	7.16223	5.75313	4.48207	9.78911	5.24066	8.3536	7.90672	8.29755	3.91839
TXK	1296	0.020441	0	0	0	0.010698	0.048593	0	0	0	0	0	0	0.009828	0.010776	0	0	0	0.01176	0	0	0.036975	0.009252	0.021535	0	0.027553	0	0	0.011968	0.010973	0.044871	0.03832	0.011941	0	0.069208	0	0	0
WSCD2	1297	0.625523	0.760996	1.3878	0.290661	1.13527	1.54971	0.34982	0.828975	0.309583	0.334813	0.804304	0.448381	1.95405	1.10884	0.819327	0.864572	1.51989	1.18263	1.62082	0.857276	1.88569	0.569857	0.435306	1.1161	1.37915	1.75622	1.48851	0.146088	0.789264	1.97118	3.41706	1.82325	1.44771	0.271933	2.96372	0.348315	0.487227
KCNQ2	1298	26.3587	20.9064	22.755	23.8968	20.1848	29.812	26.2758	34.7286	24.297	27.3241	18.2265	25.4147	21.7476	28.8997	23.5275	23.6034	18.2202	18.5977	22.7406	26.1184	22.8895	20.5909	19.3973	15.6527	15.8136	20.9257	16.7015	22.8678	21.6481	15.6792	21.5306	28.8894	26.7343	19.8175	22.802	15.5307	11.7715
TACR2	1299	0.100324	0.038204	0.107046	0.047367	0.144631	0.310107	0.061689	0.085267	0.109033	0.051175	0.113859	0.043649	0.113521	0.118667	0.032343	0.084363	0.057036	0.062813	0.144643	0.180198	0.525844	0.079821	0.052576	0.09025	0.136872	0.118799	0.028072	0.029418	0.013304	0.013834	0.835883	0.311385	0.827296	0.241852	0.22788	0.118409	1.10088
ACTR6	1300	13.2971	7.31087	9.98429	10.2641	9.17274	6.47603	10.878	12.9028	12.509	17.6389	13.036	8.44326	11.346	10.5331	13.9955	8.22267	5.00985	6.60641	11.5503	8.38721	7.33398	9.73812	6.22544	8.88647	7.13139	9.31104	6.69241	9.87195	5.8606	6.81042	27.2642	7.53304	12.2235	8.35398	9.42605	7.18762	36.2511
TIPIN	1301	7.97264	6.63978	4.54897	6.66362	4.10038	2.32542	6.80633	4.49676	7.12458	8.21805	5.17291	6.51189	3.79572	6.39623	6.62855	6.14773	5.05375	4.66478	3.81931	1.12356	1.7246	4.94069	5.8798	6.04945	4.74158	2.71401	4.86494	5.98857	4.10784	4.73011	2.99932	3.2293	3.80655	2.44613	3.24335	3.2838	1.8098
SRI	1302	28.2288	22.1822	20.2414	31.9249	17.0581	12.6523	27.9249	26.9691	32.7562	35.7661	30.5356	21.4784	19.1669	33.141	25.3742	22.0241	21.1211	21.386	23.2668	17.5992	10.9534	20.044	22.2819	21.7399	14.4599	24.6651	17.4591	27.2962	20.7016	16.8749	27.274	9.98317	39.1167	7.26026	6.58125	11.2619	25.9143
EIF4G3	1303	5.82451	17.0974	9.50419	9.91936	11.0681	15.8623	10.5761	12.6282	4.83805	3.30451	3.38585	17.5148	9.86796	7.49688	6.2874	11.4292	16.7793	15.7619	12.3691	24.1447	16.3788	14.4388	16.1297	16.4956	17.2401	11.8237	18.7743	11.3371	15.5765	18.4683	8.4835	16.3354	9.5554	14.6357	15.2114	15.394	11.0276
NUP37	1304	11.86	6.70596	5.09436	7.23406	4.46464	1.53717	6.65877	3.19671	10.8968	11.1378	8.02942	5.77973	4.43642	8.99595	6.64214	7.32083	7.26109	7.57693	5.35486	1.76791	1.83911	6.08563	7.88245	5.38366	5.48574	7.98116	7.6264	7.09887	7.13609	6.60576	4.9968	1.41847	4.53985	0.931216	1.31272	1.04996	1.72486
SEMA3A	1305	7.73387	11.6221	7.2825	2.17517	11.909	2.08988	8.49627	5.12253	6.67668	10.3353	11.2446	6.53121	9.49369	3.16091	13.6216	10.788	11.2102	9.93568	9.69778	3.22247	2.46551	7.07033	11.4377	3.63346	13.641	5.77017	9.69063	7.51295	7.8302	13.5839	2.45463	6.32069	5.90829	17.3914	8.37412	12.8073	6.09779
GTSE1	1306	15.2834	16.1311	8.05197	19.2305	9.04203	3.69605	19.8126	9.6079	14.4814	14.4982	10.0499	18.1241	7.82142	12.9779	13.0428	14.7096	21.1708	19.32	14.5027	4.23972	2.80117	16.8367	21.8257	16.6425	10.4629	10.6289	17.815	23.3435	17.0941	11.7528	5.09377	1.75951	12.0244	0.300767	0.620788	0.402178	0.546071
SEMA3C	1307	11.4862	8.02761	15.0042	13.0153	9.2797	3.20365	6.83401	7.83972	4.65094	5.70603	7.41887	14.4934	12.7792	13.7852	7.72994	9.117	5.37127	6.12197	7.76176	6.19663	4.60086	10.4047	4.6954	10.3805	7.90776	18.3627	9.66641	6.79646	9.91181	7.66782	34.4079	6.4012	8.11278	33.292	29.0768	91.0519	5.14322
TTC38	1308	5.56323	4.18464	2.54587	3.25376	3.26484	2.98734	3.8838	2.83591	6.63722	5.91456	6.59752	3.39658	2.6457	6.04685	3.53521	4.15828	5.06924	5.04336	3.12701	1.89243	2.62688	2.80977	5.88085	2.72316	2.55542	4.95071	4.08485	5.29337	5.64775	3.16834	4.44475	1.23758	4.4895	1.32156	1.13508	1.40704	2.02918
ACAT1	1309	11.506	9.51201	11.169	10.5358	10.303	9.30221	9.71705	9.20362	12.4	14.4459	12.4086	9.43642	8.85043	10.0039	11.1267	11.2443	6.89095	5.73576	6.83004	8.41547	7.32829	6.87496	5.43939	6.70026	6.96814	6.56199	6.63572	6.70459	6.0292	8.31343	15.0793	8.47618	9.04163	10.9299	11.1706	10.4577	22.7565
GRAMD4	1310	6.14589	9.70123	6.44366	4.87896	7.77816	14.3559	6.58249	5.42614	6.30664	4.63242	3.91916	8.22845	6.55021	7.20076	4.97138	8.28334	9.1774	8.98424	7.577	6.22257	11.7784	7.25368	10.3161	6.20396	7.66269	9.28675	10.7365	6.64054	12.8006	9.6063	10.1361	14.4346	9.28646	13.2122	11.867	12.2289	4.48931
CELSR1	1311	10.0117	17.9528	2.47388	3.3179	8.50456	3.05767	8.36324	0.92018	4.88098	3.08035	0.776764	7.11536	6.17233	6.44036	5.02077	16.4545	21.8099	18.6378	10.5171	2.11792	2.54722	10.9469	37.7338	6.11682	15.1914	20.9914	31.2671	14.7856	18.8788	16.7008	8.3606	0.559361	6.96718	0.179977	0.258789	0.078644	0.232464
WNT8B	1312	0.017057	0.034351	1.95711	0.079326	1.05169	0.278654	0	0.05737	1.29923	0.06949	0.04396	0	0.128785	54.9417	0	0	0.030351	0.641004	0.880033	0.162296	0.3806	0.021677	0.024119	0.095224	0.813676	35.3108	1.00011	0.039946	7.04807	0	10.2949	0	0.018769	0	0.020825	0	0.021131
ZNF638	1313	9.40485	15.3247	9.87428	10.9655	11.9269	10.5348	11.7601	9.79613	9.31653	7.07353	6.33617	13.9982	10.8231	9.7205	9.9067	12.3889	10.4706	9.67449	7.82011	6.91727	6.50487	10.2298	9.77349	10.4124	11.6376	7.94482	12.5174	7.66733	8.96439	10.668	9.81647	10.5794	9.53051	11.5216	11.4043	12.5944	8.19468
SLC25A40	1314	4.58375	3.53235	2.92504	5.11015	3.50802	3.21441	4.6567	4.36506	4.78604	4.61437	4.68063	4.52293	3.96935	4.38293	4.13719	3.65305	3.66838	4.28964	3.97885	2.72943	3.198	5.67169	4.39876	6.08703	3.42033	3.52686	3.67308	4.94918	3.6214	3.52899	3.48996	2.71745	3.98468	2.74682	2.74287	2.26174	4.93981
C18orf55	1315	22.0102	18.597	15.166	17.0356	16.1362	19.009	18.1678	15.0548	23.2099	22.4415	20.7918	16.816	13.903	19.0978	21.5254	17.7161	17.1584	16.6217	16.4801	8.05924	12.5182	12.9091	17.2744	14.8119	13.3221	13.1445	15.8748	16.0962	14.8829	15.701	16.6476	13.144	17.0803	13.2378	12.616	12.8406	13.5818
ADD2	1316	17.594	25.153	25.5318	19.222	22.001	26.8902	18.669	43.0729	18.7066	12.7396	12.1454	22.996	23.8678	30.9458	17.9732	23.5364	28.3021	29.2232	29.2275	65.5676	34.5109	21.4307	24.0894	23.3239	28.471	40.9119	31.4127	21.1467	39.0957	30.8121	29.3931	32.3993	21.9853	57.0423	36.8296	52.7462	15.5531
FGF4	1317	0	0	0	0	0	0	0	0	0	0	0.037288	0	0	0	0	0	0	0	0	0	0	0	0	0	0	0	0	0	0	0	0	0	0	0	0	0	0
RASAL2	1318	3.28562	5.57471	6.5751	6.96471	5.57692	8.14483	7.04895	4.69308	3.73784	2.21347	3.26534	6.98888	7.45399	3.78919	3.68994	4.33345	8.38116	7.74604	10.7184	8.22929	12.1281	9.05119	8.31447	13.3953	11.3917	7.1343	9.21472	8.96526	7.1859	10.3185	4.52986	6.38563	6.95125	7.97149	7.07145	9.21012	4.73259
C16orf7	1319	5.62158	6.4054	9.26269	7.39921	8.13732	17.5518	7.41441	9.3795	5.40785	4.97173	6.73527	9.55421	8.56361	6.34032	6.74872	5.96445	8.16944	8.81361	8.84101	12.605	16.0054	8.24427	7.0445	8.36693	8.01427	7.93647	7.24758	8.21233	8.64301	7.22465	9.12726	10.8636	10.0781	11.6333	9.95755	7.76564	8.57837
ZNF37A	1320	2.41604	5.51174	2.35567	2.84767	3.41758	3.50062	3.15316	2.46321	2.74642	1.87767	1.61088	4.59316	2.91184	2.52764	2.76875	4.50533	2.61187	2.67415	1.5176	1.87991	1.9536	2.34848	2.869	2.51458	3.43178	1.62216	3.44905	1.64303	2.35975	2.98938	2.31332	3.51885	2.84921	4.39481	4.66447	4.81613	1.78619
MARK3	1321	9.42331	12.6516	13.1486	10.7409	13.0795	12.7553	11.3774	10.5836	10.3536	9.86124	10.0052	12.6792	12.3755	9.26832	11.1868	11.4321	12.6889	12.5638	12.0348	12.5069	12.479	11.0781	11.6526	11.0803	13.6222	11.2144	11.7363	9.93685	12.3343	13.8625	11.1245	14.1651	11.0773	13.5585	14.2487	14.5618	8.35552
SLC25A3	1322	96.579	70.6342	62.8257	82.0656	66.5008	54.3411	68.9158	68.8389	92.915	101.857	93.3792	65.0658	62.0038	90.7036	82.3604	77.6546	62.8107	65.6132	56.5829	56.1877	49.5072	53.5081	58.4876	55.1663	49.4986	69.1944	56.8767	67.7688	68.7686	53.3763	55.0439	39.9981	64.6142	40.0306	38.6569	42.1	39.3981
[truncated: 51,054 more rows]

## Sheet: D90 Organoids
Cerebral Organoids
[truncated: 53,854 more rows]

[truncated: 1 more sheets: Comparison]
